# Supplementary material for: Plasmodium vivax readiness to transmit: implication for malaria eradication
Source: Springer Nature journal article supplement (doi:10.1186/s12918-018-0669-4), 2019-01-11
Supplement: 12918_2018_669_MOESM2_ESM.pdf [file 12918_2018_669_MOESM2_ESM.pdf]

# S1 Table

| SRR Number                            | SRR1925783 | SRR1925785 | SRR1925803   | SRR1925797   | SRR1925781 | SRR1925795   | SRR1925787 | SRR1925799   | SRR1925788 | SRR1925790 | SRR1925798   | SRR1925791   |                                                                                                |
|---------------------------------------|------------|------------|--------------|--------------|------------|--------------|------------|--------------|------------|------------|--------------|--------------|------------------------------------------------------------------------------------------------|
| Parasite Density (Parasites/ $\mu$ L) | 6          | 10         | 20           | 25           | 34         | 34           | 38         | 55           | 95         | 110        | 216          | 390          |                                                                                                |
| Parasitemia Classification            | low        | low        | low          | low          | medium     | medium       | medium     | medium       | high       | high       | high         | high         |                                                                                                |
| Patient Identifier                    | 317N-Dx    | 314N-Dx    | 3755-Dx      | 3275-Dx      | 302N-Dx    | 3245-Dx      | 319N-Dx    | 3015-Dx      | 306N-Dx    | 310N-Dx    | 3415-Dx      | 3025-Dx      |                                                                                                |
| Patient Location                      | Cali       | Cali       | Buenaventura | Buenaventura | Cali       | Buenaventura | Cali       | Buenaventura | Cali       | Cali       | Buenaventura | Buenaventura |                                                                                                |
| Reads Mapped to Parasite              | 2597       | 3316       | 856          | 810          | 7966       | 386          | 1091       | 1689         | 6821       | 8020       | 12165        | 1406         |                                                                                                |
| Gene ID                               | Patient    |            |              |              |            |              |            |              |            |            |              |              | Gene Description                                                                               |
|                                       | Patient 1  | Patient 2  | Patient 3    | Patient 4    | Patient 5  | Patient 6    | Patient 7  | Patient 8    | Patient 9  | Patient 10 | Patient 11   | Patient 12   |                                                                                                |
| PlvioMp1                              | 0          | 0          | 0            | 0            | 0          | 0            | 0          | 0            | 0          | 0          | 0            | 0            | unspecified product                                                                            |
| PlvioMp2                              | 0          | 0          | 0            | 0            | 0          | 0            | 0          | 0            | 0          | 0          | 0            | 0            | unspecified product                                                                            |
| PlvioMp3                              | 0          | 0          | 0            | 0            | 0          | 0            | 0          | 0            | 0          | 33.2406    | 0            | 0            | unspecified product                                                                            |
| PVX_000000                            | 0          | 0          | 0            | 0            | 0          | 0            | 0          | 0            | 0          | 0          | 0            | 0            | Plasmodium exported protein, unknown function                                                  |
| PVX_000005                            | 101.036    | 70.5823    | 0            | 0            | 0          | 0            | 0          | 0            | 76.5888    | 35.4911    | 20.1123      | 163.824      | Plasmodium exported protein, unknown function                                                  |
| PVX_000010                            | 2313.41    | 1730.52    | 1369.84      | 880.362      | 873.674    | 1691.34      | 842.405    | 1376.96      | 2066.14    | 2612.64    | 1655.54      | 891.954      | Plasmodium exported protein, unknown function                                                  |
| PVX_000015                            | 0          | 164.8      | 0            | 0            | 0          | 402.833      | 0          | 0            | 0          | 0          | 46.9717      | 0            | Pv-fam-d protein                                                                               |
| PVX_000020                            | 0          | 0          | 0            | 0            | 0          | 0            | 0          | 0            | 0          | 0          | 0            | 0            | variable surface protein Vir9-like,PIR protein                                                 |
| PVX_000025                            | 0          | 0          | 0            | 0            | 0          | 0            | 0          | 0            | 0          | 0          | 0            | 0            | hypothetical protein                                                                           |
| PVX_000525                            | 0          | 0          | 0            | 0            | 0          | 0            | 0          | 0            | 0          | 0          | 8.75013      | 0            | protein kinase domain containing protein                                                       |
| PVX_000530                            | 0          | 4.02029    | 0            | 0            | 1.82567    | 0            | 8.79847    | 0            | 0          | 0          | 4.58736      | 0            | hypothetical protein, conserved                                                                |
| PVX_000535                            | 60.4785    | 42.2273    | 0            | 193.355      | 0          | 0            | 0          | 0            | 0          | 42.4974    | 12.0383      | 0            | thioredoxin, putative                                                                          |
| PVX_000540                            | 0          | 0          | 0            | 0            | 7.59378    | 0            | 0          | 0            | 0          | 0          | 0            | 0            | hypothetical protein, conserved                                                                |
| PVX_000545                            | 93.7714    | 0          | 0            | 149.84       | 44.612     | 0            | 0          | 260.443      | 177.639    | 49.4223    | 130.654      | 75.9067      | serine--tRNA ligase, putative                                                                  |
| PVX_000550                            | 0          | 23.1284    | 82.3581      | 0            | 0          | 0            | 0          | 0            | 0          | 11.6439    | 26.3823      | 0            | hypothetical protein, conserved                                                                |
| PVX_000555                            | 0          | 160.537    | 0            | 0            | 0          | 0            | 98.7279    | 0            | 0          | 0          | 25.6913      | 0            | calcium-dependent protein kinase 4, putative (CDPK4)                                           |
| PVX_000560                            | 0          | 0          | 0            | 0            | 14.395     | 0            | 0          | 17.1961      | 31.8957    | 36.137     | 0            | 0            | queuine tRNA-ribosyltransferase, putative                                                      |
| PVX_000565                            | 60.3968    | 42.1703    | 0            | 0            | 0          | 0            | 92.386     | 83.885       | 22.885     | 21.22      | 36.066       | 0            | hypothetical protein, conserved                                                                |
| PVX_000570                            | 0          | 0          | 0            | 0            | 0          | 0            | 0          | 0            | 0          | 0          | 63.7946      | 0            | hypothetical protein, conserved                                                                |
| PVX_000575                            | 0          | 28.36      | 100.999      | 259.637      | 0          | 0            | 0          | 30.7846      | 14.2758    | 32.3472    | 65.764       | 0            | hypothetical protein, conserved                                                                |
| PVX_000580                            | 88.7165    | 0          | 0            | 283.86       | 0          | 0            | 135.828    | 0            | 201.733    | 155.828    | 123.618      | 143.799      | hypothetical protein, conserved                                                                |
| PVX_000585                            | 116.869    | 81.6597    | 0            | 0            | 0          | 0            | 0          | 44.3002      | 41.0496    | 69.7938    | 0            | 0            | transporter/permease protein, putative                                                         |
| PVX_000590                            | 573.119    | 320.354    | 856.628      | 367.022      | 36.4155    | 0            | 175.638    | 159.286      | 651.727    | 483.136    | 616.074      | 371.854      | eukaryotic translation initiation factor 3 subunit 2, putative                                 |
| PVX_000595                            | 0          | 0          | 0            | 0            | 0          | 0            | 0          | 12.0449      | 0          | 18.9853    | 0            | 0            | hypothetical protein, conserved                                                                |
| PVX_000600                            | 116.774    | 40.7661    | 0            | 186.658      | 55.5714    | 0            | 89.3063    | 81.0922      | 88.4931    | 41.0283    | 11.622       | 0            | cysteine desulfurase, putative (SufS)                                                          |
| PVX_000604                            | 149.435    | 208.715    | 0            | 0            | 71.1426    | 0            | 228.688    | 207.579      | 56.6282    | 104.998    | 133.855      | 121.06       | hypothetical protein, conserved                                                                |
| PVX_000606                            | 0          | 0          | 0            | 0            | 90.4174    | 0            | 0          | 0            | 0          | 0          | 112.865      | 0            | transcription initiation factor IIA subunit 1, putative                                        |
| PVX_000610                            | 221.278    | 115.868    | 550.312      | 176.836      | 87.746     | 0            | 169.211    | 230.488      | 419.208    | 272.113    | 418.429      | 89.582       | hypothetical protein, conserved                                                                |
| PVX_000615                            | 0          | 0          | 0            | 0            | 21.0237    | 339.184      | 0          | 50.211       | 0          | 13.188     | 0            | 0            | hypothetical protein, conserved                                                                |
| PVX_000620                            | 0          | 43.6381    | 77.6934      | 99.863       | 39.6452    | 0            | 47.7744    | 43.4063      | 59.2144    | 54.9253    | 56.001       | 0            | protein SDA1, putative (SDA1)                                                                  |
| PVX_000625                            | 24.9372    | 52.211     | 0            | 159.293      | 15.8101    | 0            | 0          | 103.869      | 28.34      | 26.2892    | 29.7811      | 0            | RNA-binding protein, putative                                                                  |
| PVX_000630                            | 159.702    | 111.535    | 0            | 0            | 101.387    | 0            | 0          | 151.302      | 112.209    | 95.3685    | 129.396      | 0            | phosphoantothenate--cysteine ligase, putative,phosphoantothenoylecysteine synthetase, putative |
| PVX_000635                            | 0          | 0          | 0            | 0            | 0          | 0            | 0          | 0            | 35.733     | 60.7486    | 0            | 0            | hypothetical protein, conserved                                                                |
| PVX_000640                            | 107.985    | 0          | 0            | 0            | 0          | 0            | 0          | 150.05       | 122.79     | 37.9308    | 64.4875      | 0            | 30S ribosomal protein S12, putative                                                            |
| PVX_000645                            | 0          | 0          | 0            | 0            | 0          | 0            | 0          | 0            | 0          | 19.5242    | 0            | 0            | hypothetical protein, conserved                                                                |
| PVX_000650                            | 17.6385    | 0          | 0            | 56.324       | 16.7711    | 0            | 26.944     | 97.9511      | 20.0444    | 18.5955    | 35.1075      | 28.5328      | DNA polymerase alpha, putative                                                                 |
| PVX_000660                            | 7.86427    | 0          | 0            | 0            | 0          | 0            | 0          | 2.97878      | 2.76379    | 10.9569    | 0            | 0            | hypothetical protein                                                                           |
| PVX_000670                            | 0          | 0          | 50.9655      | 0            | 0          | 0            | 0          | 0            | 7.20857    | 24.4975    | 0            | 0            | hypothetical protein, conserved                                                                |
| PVX_000675                            | 0          | 0          | 0            | 0            | 0          | 0            | 0          | 0            | 0          | 0          | 0            | 0            | hypothetical protein                                                                           |
| PVX_000677                            | 0          | 0          | 0            | 0            | 0          | 0            | 0          | 0            | 0          | 0          | 0            | 0            | tRNA Glutamic acid                                                                             |
| PVX_000678                            | 0          | 0          | 0            | 0            | 0          | 0            | 0          | 0            | 0          | 0          | 0            | 0            | tRNA Alanine                                                                                   |
| PVX_000680                            | 0          | 0          | 0            | 0            | 16.8532    | 0            | 0          | 20.1394      | 0          | 10.5816    | 43.0102      | 0            | RNA helicase, putative                                                                         |
| PVX_000685                            | 53.6288    | 0          | 266.734      | 0            | 0          | 0            | 0          | 0            | 56.5283    | 53.3737    | 0            | 0            | hypothetical protein, conserved                                                                |
| PVX_000690                            | 29.0209    | 0          | 0            | 0            | 0          | 0            | 0          | 0            | 43.9759    | 10.1979    | 28.8819      | 0            | hypothetical protein, conserved                                                                |
| PVX_000695                            | 0          | 0          | 0            | 0            | 0          | 0            | 0          | 0            | 78.5905    | 44.5709    | 0            | 0            | hypothetical protein, conserved                                                                |
| PVX_000700                            | 0          | 0          | 0            | 0            | 0          | 0            | 0          | 46.1647      | 0          | 19.8529    | 0            | 0            | hypothetical protein, conserved                                                                |
| PVX_000705                            | 39.9211    | 55.7327    | 0            | 0            | 25.3191    | 0            | 61.0255    | 0            | 45.3733    | 42.0824    | 31.7844      | 0            | hypothetical protein, conserved                                                                |
| PVX_000710                            | 0          | 15.182     | 0            | 0            | 6.89564    | 0            | 0          | 0            | 7.64484    | 17.3202    | 0            | 0            | hypothetical protein, conserved                                                                |
| PVX_000715                            | 0          | 29.823     | 0            | 0            | 13.5489    | 0            | 0          | 16.1861      | 30.0233    | 17.0075    | 138.317      | 0            | ribosome biogenesis GTPase A, putative (RbgA)                                                  |
| PVX_000720                            | 172.975    | 60.4075    | 0            | 0            | 54.9154    | 443.035      | 0          | 120.153      | 163.884    | 182.297    | 120.512      | 0            | hypothetical protein, conserved                                                                |
| PVX_000725                            | 0          | 0          | 0            | 0            | 80.4804    | 0            | 0          | 96.0032      | 44.4742    | 75.6211    | 205.464      | 0            | hypothetical protein, conserved                                                                |
| PVX_000730                            | 107.209    | 74.9005    | 0            | 0            | 34.0536    | 0            | 164.237    | 148.971      | 0          | 37.6583    | 106.706      | 0            | exosome complex component RRP4, putative (RRP4)                                                |
| PVX_000735                            | 33.6599    | 23.4939    | 0            | 0            | 10.6724    | 0            | 51.444     | 0            | 25.5035    | 11.8278    | 46.8984      | 0            | protein phosphatase 2C, putative                                                               |

| Gene ID    | Patient 1 | Patient 2 | Patient 3 | Patient 4 | Patient 5 | Patient 6 | Patient 7 | Patient 8 | Patient 9 | Patient 10 | Patient 11 | Patient 12 | Gene Description                                                |
|------------|-----------|-----------|-----------|-----------|-----------|-----------|-----------|-----------|-----------|------------|------------|------------|-----------------------------------------------------------------|
| Patient    |           |           |           |           |           |           |           |           |           |            |            |            |                                                                 |
| PVX_000737 | 0         | 0         | 0         | 0         | 0         | 0         | 0         | 0         | 0         | 0          | 0          | 0          | tRNA Isoleucine                                                 |
| PVX_000738 | 0         | 0         | 0         | 0         | 0         | 0         | 0         | 0         | 0         | 0          | 0          | 0          | tRNA Serine                                                     |
| PVX_000745 | 38.3309   | 214.047   | 0         | 122.471   | 0         | 0         | 58.5917   | 0         | 14.5218   | 0          | 22.8887    | 0          | hypothetical protein, conserved                                 |
| PVX_000750 | 0         | 0         | 0         | 0         | 0         | 0         | 0         | 0         | 0         | 0          | 0          | 0          | actin-like protein, putative                                    |
| PVX_000755 | 64.6742   | 180.637   | 160.885   | 206.794   | 0         | 331.08    | 0         | 0         | 98.026    | 90.8895    | 51.494     | 0          | zinc finger protein, putative                                   |
| PVX_000760 | 0         | 0         | 0         | 0         | 0         | 0         | 0         | 0         | 0         | 0          | 0          | 0          | hypothetical protein, conserved                                 |
| PVX_000765 | 0         | 17.6746   | 0         | 80.8872   | 16.0563   | 258.984   | 0         | 0         | 38.3749   | 35.5978    | 45.367     | 40.9762    | replication factor a protein, putative                          |
| PVX_000770 | 0         | 0         | 0         | 0         | 28.5068   | 0         | 0         | 124.738   | 68.0545   | 0          | 17.8723    | 0          | hypothetical protein, conserved                                 |
| PVX_000775 | 0         | 71.66     | 0         | 0         | 65.1182   | 262.623   | 0         | 0         | 136.117   | 108.195    | 61.2935    | 83.0997    | chaperone DNAJ protein, putative                                |
| PVX_000780 | 36.6813   | 25.6038   | 0         | 234.39    | 0         | 0         | 0         | 50.9347   | 41.6901   | 25.7785    | 36.506     | 59.369     | hypothetical protein, conserved                                 |
| PVX_000785 | 69.0132   | 48.1918   | 0         | 0         | 21.9007   | 0         | 0         | 95.8604   | 0         | 72.7389    | 13.7373    | 0          | ribosomal processing protein, putative                          |
| PVX_000790 | 50.8556   | 35.504    | 0         | 0         | 16.1313   | 0         | 0         | 0         | 0         | 17.8686    | 40.4908    | 0          | U4/U6 small nuclear ribonucleoprotein PRP31, putative           |
| PVX_000795 | 0         | 0         | 0         | 46.8692   | 4.652     | 0         | 0         | 0         | 11.1205   | 0          | 20.4516    | 23.7432    | hypothetical protein, conserved                                 |
| PVX_000800 | 46.8121   | 0         | 116.393   | 149.605   | 14.8473   | 0         | 0         | 0         | 17.736    | 65.793     | 55.9069    | 0          | tRNA N6-adenosine threonylcarbamoyltransferase, putative (KAE1) |
| PVX_000805 | 0         | 0         | 0         | 0         | 0         | 0         | 0         | 0         | 0         | 0          | 36.9939    | 20.9645    | hypothetical protein, conserved                                 |
| PVX_000810 | 0         | 0         | 0         | 0         | 0         | 0         | 0         | 0         | 0         | 0          | 0          | 0          | perforin-like protein 1 (PLP1)                                  |
| PVX_000815 | 0         | 0         | 0         | 0         | 0         | 0         | 0         | 0         | 0         | 0          | 0          | 0          | sporozoite invasion-associated protein 1, putative (SIAP1)      |
| PVX_000820 | 0         | 0         | 0         | 0         | 12.6765   | 0         | 0         | 0         | 45.4341   | 14.0463    | 47.7405    | 0          | flap endonuclease 1, putative (FEN1)                            |
| PVX_000825 | 66.4017   | 0         | 0         | 0         | 0         | 0         | 0         | 0         | 50.3228   | 69.9873    | 52.8696    | 0          | hypothetical protein, conserved                                 |
| PVX_000830 | 106.444   | 0         | 0         | 0         | 0         | 0         | 0         | 0         | 40.3455   | 74.7794    | 63.5669    | 0          | hypothetical protein, conserved                                 |
| PVX_000835 | 0         | 0         | 143.717   | 0         | 0         | 0         | 0         | 0         | 0         | 0          | 11.5019    | 0          | hypothetical protein, conserved                                 |
| PVX_000840 | 0         | 21.8879   | 0         | 0         | 0         | 0         | 0         | 0         | 11.8802   | 0          | 12.4839    | 0          | hypothetical protein, conserved                                 |
| PVX_000845 | 0         | 0         | 0         | 894.713   | 0         | 0         | 0         | 0         | 0         | 0          | 0          | 0          | hypothetical protein, conserved                                 |
| PVX_000850 | 94.2157   | 0         | 117.129   | 0         | 14.9412   | 0         | 0         | 0         | 0         | 16.5521    | 84.39      | 0          | AAA family ATPase, putative                                     |
| PVX_000855 | 0         | 0         | 0         | 0         | 0         | 0         | 0         | 0         | 0         | 0          | 0          | 7.70488    | hypothetical protein, conserved                                 |
| PVX_000860 | 0         | 0         | 0         | 0         | 0         | 0         | 0         | 0         | 0         | 0          | 4.166      | 0          | hypothetical protein, conserved                                 |
| PVX_000865 | 0         | 0         | 0         | 0         | 0         | 0         | 0         | 0         | 0         | 0          | 0          | 0          | hypothetical protein, conserved                                 |
| PVX_000870 | 0         | 0         | 0         | 0         | 0         | 0         | 0         | 0         | 36.0925   | 33.4527    | 56.8695    | 0          | mitochondrial carrier protein, putative                         |
| PVX_000875 | 0         | 0         | 0         | 0         | 0         | 0         | 0         | 0         | 0         | 0          | 0          | 0          | hypothetical protein, conserved                                 |
| PVX_000880 | 0         | 127.98    | 0         | 0         | 19.385    | 0         | 0         | 84.8591   | 23.1507   | 42.9325    | 60.8078    | 0          | hypothetical protein, conserved                                 |
| PVX_000885 | 0         | 77.5038   | 0         | 0         | 35.2387   | 568.659   | 169.957   | 0         | 84.0943   | 38.9646    | 66.2463    | 179.916    | peptidyl-tRNA hydrolase, putative                               |
| PVX_000890 | 75.0937   | 52.4418   | 186.86    | 240.18    | 0         | 0         | 0         | 104.312   | 56.9134   | 79.1452    | 74.7386    | 0          | methyltransferase, putative                                     |
| PVX_000895 | 0         | 94.4159   | 0         | 0         | 0         | 0         | 0         | 93.9039   | 25.6178   | 23.7519    | 53.8282    | 0          | hypothetical protein, conserved                                 |
| PVX_000900 | 0         | 0         | 0         | 0         | 0         | 0         | 0         | 18.4284   | 0         | 0          | 0          | 21.4708    | hypothetical protein, conserved                                 |
| PVX_000905 | 0         | 0         | 340.704   | 0         | 0         | 0         | 0         | 0         | 51.8174   | 96.0077    | 163.256    | 0          | hypothetical protein, conserved                                 |
| PVX_000910 | 0         | 0         | 0         | 0         | 0         | 0         | 0         | 0         | 0         | 0          | 0          | 14.9895    | hypothetical protein, conserved                                 |
| PVX_000915 | 386.15    | 0         | 0         | 0         | 0         | 0         | 0         | 0         | 0         | 0          | 153.793    | 0          | hypothetical protein, conserved                                 |
| PVX_000920 | 0         | 22.215    | 0         | 0         | 0         | 162.775   | 0         | 44.1938   | 0         | 22.3685    | 44.3464    | 0          | hypothetical protein, conserved                                 |
| PVX_000925 | 488.53    | 85.3431   | 0         | 0         | 38.8081   | 0         | 0         | 339.464   | 92.5939   | 171.588    | 72.9375    | 198.148    | hydroxyacyl glutathione hydrolase, putative                     |
| PVX_000930 | 0         | 0         | 0         | 0         | 0         | 0         | 0         | 0         | 48.6911   | 45.1121    | 51.1377    | 0          | sexual stage antigen s16, putative                              |
| PVX_000935 | 349.104   | 48.7562   | 521.141   | 223.282   | 22.1574   | 0         | 213.667   | 0         | 132.288   | 98.1198    | 125.082    | 113.111    | vacuolar ATP synthase subunit b, putative                       |
| PVX_000940 | 48.8833   | 68.2524   | 0         | 156.233   | 0         | 0         | 74.7469   | 0         | 55.5629   | 17.1758    | 126.491    | 158.29     | hypothetical protein, conserved                                 |
| PVX_000945 | 0         | 0         | 0         | 135.163   | 0         | 0         | 0         | 0         | 0         | 0          | 0          | 0          | apical sushi protein, putative (ASP)                            |
| PVX_000950 | 221.311   | 0         | 0         | 354.275   | 35.1513   | 0         | 0         | 153.765   | 41.9431   | 0          | 44.055     | 0          | hypothetical protein, conserved                                 |
| PVX_000955 | 74.8303   | 73.1045   | 37.178    | 47.7867   | 9.4861    | 76.5001   | 0         | 20.7771   | 51.0214   | 36.816     | 41.7035    | 24.208     | lysine decarboxylase, putative                                  |
| PVX_000960 | 240.329   | 167.932   | 0         | 0         | 0         | 0         | 0         | 0         | 91.1008   | 0          | 95.6827    | 0          | secy-independent transporter protein, putative                  |
| PVX_000965 | 0         | 0         | 246.299   | 0         | 62.825    | 0         | 0         | 0         | 74.9793   | 34.7462    | 39.3799    | 0          | hypothetical protein, conserved                                 |
| PVX_000970 | 40.4182   | 28.2025   | 0         | 64.5188   | 16.0098   | 0         | 46.295    | 84.1635   | 30.6192   | 21.3064    | 50.2795    | 32.6842    | pre-mRNA-processing-splicing factor 8, putative                 |
| PVX_000975 | 10.503    | 7.32869   | 26.0878   | 0         | 6.6565    | 0         | 0         | 0         | 0         | 0          | 22.9954    | 33.9734    | liver specific protein 2, putative (LISP2)                      |
| PVX_000980 | 0         | 0         | 0         | 0         | 0         | 0         | 0         | 0         | 0         | 0          | 0          | 0          | Plasmodium yoelii blood stage membrane protein ag-1, putative   |
| PVX_000985 | 20.0579   | 13.9975   | 49.834    | 128.108   | 19.0726   | 205.086   | 0         | 55.6947   | 60.7844   | 56.3891    | 35.9309    | 32.4487    | protein transport protein Sec24B, putative (SEC24B)             |
| PVX_000990 | 61.9865   | 86.5621   | 0         | 0         | 0         | 0         | 0         | 86.0942   | 70.4629   | 65.3351    | 24.6769    | 0          | ATP-dependent RNA helicase protein, putative                    |
| PVX_000995 | 0         | 0         | 0         | 0         | 0         | 0         | 0         | 0         | 0         | 0          | 0          | 0          | 6-cysteine protein (P41)                                        |
| PVX_001000 | 0         | 0         | 0         | 0         | 0         | 0         | 0         | 0         | 0         | 0          | 9.87575    | 0          | hypothetical protein, conserved                                 |
| PVX_001005 | 0         | 0         | 0         | 0         | 13.6074   | 0         | 0         | 0         | 0         | 0          | 0          | 0          | dipeptidyl aminopeptidase 3, putative (DPAP3)                   |
| PVX_001010 | 0         | 0         | 0         | 0         | 0         | 0         | 0         | 0         | 0         | 0          | 0          | 0          | hypothetical protein, conserved                                 |
| PVX_001015 | 0         | 0         | 0         | 0         | 0         | 0         | 0         | 0         | 0         | 0          | 0          | 0          | hypothetical protein, conserved                                 |
| PVX_001020 | 0         | 0         | 0         | 0         | 0         | 0         | 0         | 0         | 0         | 0          | 0          | 0          | 6-cysteine protein (P52)                                        |
| PVX_001025 | 0         | 0         | 0         | 0         | 0         | 0         | 0         | 0         | 0         | 0          | 0          | 0          | 6-cysteine protein (P36)                                        |
| PVX_001030 | 0         | 59.6744   | 106.263   | 0         | 27.1107   | 0         | 196.035   | 118.711   | 64.7753   | 45.0564    | 144.633    | 0          | hypothetical protein, conserved                                 |
| PVX_001035 | 273.048   | 0         | 0         | 0         | 87.0847   | 0         | 0         | 0         | 207.224   | 95.8312    | 54.3655    | 0          | hypothetical protein, conserved                                 |
| PVX_001040 | 0         | 0         | 0         | 0         | 0         | 0         | 0         | 0         | 0         | 0          | 1.70703    | 0          | transcription factor with AP2 domain(s), putative (ApiAP2)      |

| Gene ID    | Patient 1 | Patient 2 | Patient 3 | Patient 4 | Patient 5 | Patient 6 | Patient 7 | Patient 8 | Patient 9 | Patient 10 | Patient 11 | Patient 12 | Gene Description                                                                                      |
|------------|-----------|-----------|-----------|-----------|-----------|-----------|-----------|-----------|-----------|------------|------------|------------|-------------------------------------------------------------------------------------------------------|
| Patient    |           |           |           |           |           |           |           |           |           |            |            |            |                                                                                                       |
| PVX_001045 | 0         | 0         | 0         | 0         | 0         | 0         | 0         | 0         | 0         | 0          | 78.0146    | 0          | hypothetical protein, conserved                                                                       |
| PVX_001050 | 0         | 0         | 0         | 0         | 0         | 0         | 25.9759   | 0         | 19.3244   | 17.9277    | 3.38467    | 27.5076    | SET domain protein, putative (SET8)                                                                   |
| PVX_001055 | 0         | 0         | 0         | 0         | 0         | 0         | 0         | 0         | 0         | 39.0034    | 14.7292    | 0          | alpha/beta hydrolase, putative                                                                        |
| PVX_001060 | 136.163   | 63.3689   | 0         | 0         | 14.395    | 0         | 0         | 0         | 34.3922   | 0          | 45.1713    | 0          | splicing factor, putative,CGI-201 protein, short form, putative,crooked neck-like protein 1, putative |
| PVX_001065 | 0         | 0         | 93.2435   | 0         | 0         | 0         | 0         | 0         | 0         | 0          | 29.8659    | 0          | hypothetical protein, conserved                                                                       |
| PVX_001070 | 0         | 0         | 0         | 0         | 0         | 0         | 0         | 0         | 0         | 0          | 0          | 0          | hypothetical protein                                                                                  |
| PVX_001075 | 0         | 0         | 0         | 0         | 0         | 0         | 0         | 0         | 0         | 0          | 0          | 0          | ubiquitin specific protease, putative                                                                 |
| PVX_001080 | 0         | 0         | 0         | 0         | 0         | 0         | 22.8334   | 6.23023   | 8.6708    | 1.63691    | 13.3003    | 0          | hypothetical protein, conserved                                                                       |
| PVX_001085 | 0         | 0         | 0         | 0         | 116.883   | 0         | 0         | 0         | 0         | 0          | 145.621    | 0          | hypothetical protein, conserved                                                                       |
| PVX_001090 | 0         | 44.0443   | 0         | 0         | 20.0145   | 0         | 96.4966   | 0         | 23.9017   | 44.324     | 50.2236    | 0          | hypothetical protein, conserved                                                                       |
| PVX_001095 | 0         | 0         | 0         | 0         | 13.8062   | 0         | 0         | 0         | 0         | 76.4818    | 60.6556    | 70.4723    | hypothetical protein, conserved                                                                       |
| PVX_001097 | 0         | 0         | 0         | 0         | 0         | 0         | 0         | 0         | 0         | 0          | 0          | 0          | tRNA Asparagine                                                                                       |
| PVX_001100 | 0         | 0         | 0         | 0         | 0         | 0         | 0         | 0         | 0         | 0          | 0          | 0          | RAD protein (Pv-fam-e)                                                                                |
| PVX_001105 | 0         | 0         | 0         | 0         | 0         | 0         | 0         | 0         | 0         | 31.8601    | 18.0535    | 0          | Plasmodium exported protein, unknown function, pseudogene                                             |
| PVX_001110 | 0         | 0         | 0         | 0         | 0         | 0         | 0         | 0         | 0         | 0          | 0          | 0          | hypothetical protein                                                                                  |
| PVX_001610 | 0         | 0         | 0         | 0         | 0         | 0         | 0         | 0         | 0         | 0          | 18.4844    | 0          | variable surface protein Vir25-related,PIR protein                                                    |
| PVX_001615 | 0         | 0         | 0         | 0         | 0         | 0         | 0         | 0         | 0         | 0          | 0          | 0          | variable surface protein Vir12/24-related,PIR protein                                                 |
| PVX_001620 | 0         | 0         | 0         | 0         | 0         | 0         | 0         | 0         | 0         | 0          | 0          | 0          | hypothetical protein                                                                                  |
| PVX_001625 | 0         | 0         | 0         | 0         | 0         | 0         | 0         | 0         | 0         | 0          | 15.0998    | 0          | variable surface protein Vir12-related,PIR protein                                                    |
| PVX_001630 | 0         | 0         | 0         | 0         | 0         | 0         | 0         | 0         | 0         | 26.3155    | 14.9102    | 0          | VIR protein, pseudogene,PIR protein, pseudogene                                                       |
| PVX_001635 | 0         | 0         | 0         | 0         | 0         | 0         | 0         | 0         | 0         | 0          | 9.84301    | 0          | VIR protein,PIR protein                                                                               |
| PVX_001640 | 0         | 0         | 0         | 0         | 21.4047   | 0         | 0         | 0         | 0         | 0          | 0          | 0          | VIR protein,PIR protein                                                                               |
| PVX_001645 | 0         | 17.5228   | 0         | 0         | 15.923    | 0         | 0         | 0         | 0         | 0          | 19.9842    | 0          | variable surface protein Vir12-related,PIR protein                                                    |
| PVX_001650 | 43.7459   | 152.688   | 0         | 0         | 27.7475   | 223.803   | 66.8804   | 0         | 66.2956   | 61.4844    | 52.2447    | 70.8172    | Pv-fam-d protein                                                                                      |
| PVX_001655 | 0         | 0         | 0         | 0         | 0         | 0         | 0         | 0         | 77.3628   | 143.224    | 0          | 0          | hypothetical protein                                                                                  |
| PVX_001660 | 0         | 239.085   | 0         | 0         | 0         | 0         | 0         | 0         | 0         | 0          | 0          | 0          | Plasmodium exported protein, unknown function, pseudogene                                             |
| PVX_001670 | 252.556   | 564.214   | 251.206   | 484.33    | 176.241   | 258.466   | 154.48    | 280.592   | 382.759   | 532.429    | 442.382    | 572.492    | Plasmodium exported protein, unknown function                                                         |
| PVX_001675 | 0         | 0         | 0         | 0         | 0         | 0         | 0         | 0         | 0         | 0          | 22.4721    | 0          | Phist protein (Pf-fam-b)                                                                              |
| PVX_001680 | 0         | 0         | 0         | 0         | 0         | 0         | 0         | 0         | 0         | 0          | 0          | 0          | Phist protein (Pf-fam-b)                                                                              |
| PVX_001685 | 346.704   | 363.101   | 143.717   | 184.727   | 73.3286   | 591.493   | 88.3819   | 401.27    | 569.26    | 426.348    | 149.525    | 93.5795    | Phist protein (Pf-fam-b)                                                                              |
| PVX_001690 | 78.6577   | 0         | 0         | 0         | 0         | 0         | 0         | 0         | 0         | 0          | 0          | 0          | Phist protein (Pf-fam-b)                                                                              |
| PVX_001695 | 0         | 0         | 0         | 0         | 0         | 0         | 0         | 0         | 0         | 0          | 0          | 0          | Phist protein (Pf-fam-b)                                                                              |
| PVX_001700 | 0         | 0         | 0         | 0         | 0         | 0         | 0         | 0         | 0         | 0          | 36.9688    | 0          | Phist protein (Pf-fam-b)                                                                              |
| PVX_001705 | 0         | 0         | 0         | 0         | 0         | 0         | 0         | 0         | 34.2334   | 0          | 17.9806    | 0          | Phist protein (Pf-fam-b)                                                                              |
| PVX_001710 | 0         | 99.1691   | 0         | 0         | 0         | 728.008   | 0         | 197.218   | 0         | 49.8291    | 56.4896    | 0          | Phist protein (Pf-fam-b)                                                                              |
| PVX_001715 | 0         | 0         | 0         | 0         | 0         | 0         | 0         | 0         | 0         | 0          | 0          | 0          | early transcribed membrane protein (ETAMP) (ETAMP10.3)                                                |
| PVX_001720 | 144.917   | 0         | 144.055   | 0         | 36.7542   | 0         | 0         | 80.4849   | 32.9392   | 40.7388    | 92.3024    | 46.8996    | DNA polymerase delta catalytic subunit, putative                                                      |
| PVX_001725 | 0         | 0         | 0         | 0         | 0         | 0         | 0         | 0         | 27.6896   | 0          | 0          | 0          | rhopty neck protein 12, putative (RON12)                                                              |
| PVX_001730 | 67.1491   | 0         | 0         | 0         | 0         | 0         | 0         | 0         | 0         | 0          | 53.4647    | 0          | enoyl-CoA hydratase-related protein, putative                                                         |
| PVX_001735 | 0         | 0         | 0         | 0         | 0         | 0         | 0         | 79.4838   | 21.6845   | 0          | 34.1747    | 185.361    | golgi re-assembly stacking protein, putative (GRASP)                                                  |
| PVX_001740 | 0         | 0         | 0         | 0         | 0         | 0         | 0         | 0         | 0         | 0          | 33.1305    | 0          | phosphomannomutase, putative                                                                          |
| PVX_001745 | 0         | 0         | 0         | 0         | 0         | 0         | 0         | 0         | 358.201   | 0          | 0          | 0          | hypothetical protein, conserved                                                                       |
| PVX_001750 | 104.077   | 36.3303   | 129.406   | 166.332   | 0         | 0         | 159.159   | 0         | 19.7168   | 54.8524    | 93.2234    | 0          | hypothetical protein, conserved                                                                       |
| PVX_001752 | 0         | 0         | 0         | 0         | 0         | 0         | 0         | 0         | 0         | 0          | 0          | 0          | hypothetical protein                                                                                  |
| PVX_001755 | 0         | 47.1475   | 83.9447   | 0         | 21.4173   | 0         | 0         | 0         | 12.7951   | 11.8679    | 13.4451    | 0          | hypothetical protein, conserved                                                                       |
| PVX_001760 | 74.5308   | 52.0484   | 185.456   | 0         | 94.6193   | 0         | 0         | 103.53    | 141.217   | 104.736    | 89.014     | 0          | 26S proteasome regulatory subunit p55, putative                                                       |
| PVX_001765 | 81.2279   | 0         | 0         | 0         | 0         | 0         | 0         | 0         | 30.7826   | 0          | 0          | 0          | tRNA pseudouridine synthase, putative                                                                 |
| PVX_001770 | 0         | 0         | 0         | 0         | 0         | 756.932   | 0         | 0         | 0         | 0          | 58.7245    | 0          | hypothetical protein, conserved                                                                       |
| PVX_001775 | 14.9811   | 0         | 0         | 0         | 0         | 0         | 22.8827   | 0         | 11.3495   | 10.5294    | 8.94545    | 0          | serine/threonine protein phosphatase 8, putative (PPP8)                                               |
| PVX_001780 | 130.599   | 60.7781   | 0         | 0         | 27.6124   | 0         | 66.5546   | 0         | 32.9865   | 45.8891    | 43.3254    | 0          | hypothetical protein, conserved                                                                       |
| PVX_001782 | 0         | 0         | 0         | 0         | 0         | 0         | 0         | 0         | 0         | 0          | 49.6663    | 0          | hypothetical protein                                                                                  |
| PVX_001783 | 0         | 0         | 0         | 0         | 0         | 0         | 0         | 531.006   | 0         | 0          | 38.0085    | 0          | hypothetical protein                                                                                  |
| PVX_001785 | 0         | 0         | 0         | 0         | 0         | 0         | 0         | 0         | 0         | 0          | 0          | 0          | hypothetical protein, conserved                                                                       |
| PVX_001790 | 0         | 40.6794   | 0         | 62.0503   | 12.3174   | 0         | 0         | 26.9765   | 22.0814   | 20.4848    | 19.3375    | 0          | hypothetical protein, conserved                                                                       |
| PVX_001795 | 58.4635   | 0         | 0         | 0         | 0         | 0         | 0         | 81.1983   | 0         | 0          | 34.9115    | 0          | hypothetical protein, conserved                                                                       |
| PVX_001800 | 0         | 0         | 0         | 0         | 0         | 0         | 0         | 0         | 36.3858   | 33.7435    | 76.4624    | 0          | hypothetical protein, conserved                                                                       |
| PVX_001805 | 44.9094   | 31.3503   | 0         | 0         | 14.2431   | 0         | 68.6617   | 62.365    | 34.0297   | 15.7798    | 80.4514    | 0          | hypothetical protein, conserved                                                                       |
| PVX_001810 | 26.6439   | 27.888    | 33.0922   | 42.535    | 12.6655   | 0         | 20.3474   | 18.4942   | 0         | 23.4084    | 15.9094    | 21.5475    | hypothetical protein, conserved                                                                       |
| PVX_001820 | 0         | 0         | 0         | 0         | 0         | 0         | 34.4948   | 0         | 0         | 0          | 13.4818    | 0          | hypothetical protein                                                                                  |
| PVX_001825 | 0         | 0         | 0         | 0         | 0         | 0         | 0         | 0         | 0         | 0          | 0          | 0          | hypothetical protein, conserved                                                                       |
| PVX_001830 | 0         | 0         | 0         | 0         | 0         | 0         | 0         | 0         | 0         | 0          | 0          | 0          | hypothetical protein, conserved                                                                       |
| PVX_001835 | 829.108   | 0         | 517.705   | 0         | 0         | 1065.65   | 637.104   | 576.604   | 943.427   | 509.402    | 165.066    | 0          | 60S ribosomal protein L30, putative                                                                   |

| Gene ID    | Patient 1 | Patient 2 | Patient 3 | Patient 4 | Patient 5 | Patient 6 | Patient 7 | Patient 8 | Patient 9 | Patient 10 | Patient 11 | Patient 12 | Gene Description                                              |
|------------|-----------|-----------|-----------|-----------|-----------|-----------|-----------|-----------|-----------|------------|------------|------------|---------------------------------------------------------------|
| Patient    |           |           |           |           |           |           |           |           |           |            |            |            |                                                               |
| PVX_001840 | 0         | 17.3891   | 0         | 0         | 0         | 0         | 0         | 0         | 0         | 8.75575    | 24.7969    | 0          | hypothetical protein, conserved                               |
| PVX_001845 | 62.0028   | 0         | 154.094   | 0         | 9.82883   | 0         | 47.3769   | 0         | 23.4888   | 21.7875    | 43.1942    | 50.168     | hypothetical protein, conserved                               |
| PVX_001850 | 0         | 0         | 0         | 0         | 0         | 0         | 0         | 142.796   | 0         | 18.0636    | 10.2332    | 83.2431    | hypothetical protein                                          |
| PVX_001855 | 0         | 0         | 0         | 0         | 0         | 0         | 50.9263   | 0         | 0         | 0          | 13.2648    | 0          | rRNA methyltransferase, putative                              |
| PVX_001860 | 0         | 0         | 0         | 0         | 0         | 0         | 0         | 0         | 0         | 0          | 103.606    | 853.505    | autophagy-related protein 8, putative (ATG8)                  |
| PVX_001865 | 57.1566   | 0         | 0         | 0         | 18.1328   | 0         | 0         | 79.3822   | 43.3136   | 200.819    | 68.262     | 92.5619    | RNA-binding protein, putative                                 |
| PVX_001868 | 0         | 0         | 0         | 0         | 0         | 0         | 0         | 0         | 0         | 0          | 0          | 0          | hypothetical protein, conserved                               |
| PVX_001872 | 0         | 0         | 0         | 0         | 0         | 0         | 0         | 0         | 0         | 0          | 12.7019    | 0          | hypothetical protein, conserved                               |
| PVX_001875 | 0         | 0         | 0         | 0         | 0         | 0         | 0         | 0         | 0         | 0          | 0          | 0          | cytoplasmic dynein intermediate chain, putative               |
| PVX_001880 | 182.919   | 127.718   | 151.662   | 194.939   | 58.036    | 0         | 0         | 84.6856   | 138.62    | 128.534    | 60.6835    | 0          | S-adenosyl-L-methionine-dependent methyltransferase, putative |
| PVX_001885 | 81.6727   | 0         | 0         | 0         | 0         | 0         | 0         | 0         | 30.9512   | 57.3842    | 97.5446    | 0          | hypothetical protein, conserved                               |
| PVX_001890 | 0         | 0         | 0         | 0         | 6.31506   | 0         | 0         | 55.3226   | 30.1892   | 21.0047    | 31.7252    | 0          | hypothetical protein, conserved                               |
| PVX_001895 | 0         | 35.703    | 0         | 0         | 0         | 0         | 0         | 35.514    | 19.3794   | 8.98846    | 20.3648    | 0          | histone acetyltransferase, putative                           |
| PVX_001900 | 0         | 0         | 0         | 0         | 0         | 0         | 0         | 0         | 0         | 0          | 0          | 0          | dihydroliipoamide acetyltransferase, putative                 |
| PVX_001905 | 0         | 0         | 1306.25   | 839.491   | 0         | 0         | 0         | 363.354   | 198.139   | 0          | 155.956    | 0          | ADP-ribosylation factor, putative (ARF1)                      |
| PVX_001910 | 0         | 0         | 0         | 0         | 0         | 0         | 0         | 284.629   | 0         | 0          | 81.5544    | 0          | hypothetical protein, conserved                               |
| PVX_001920 | 58.1031   | 13.5158   | 0         | 0         | 42.9708   | 0         | 0         | 53.7778   | 66.0291   | 34.0306    | 84.8087    | 31.3316    | hypothetical protein, conserved                               |
| PVX_001925 | 0         | 0         | 0         | 182.601   | 18.1212   | 0         | 0         | 0         | 0         | 0          | 68.2185    | 0          | hypothetical protein, conserved                               |
| PVX_001930 | 77.2322   | 53.9368   | 0         | 0         | 24.5138   | 0         | 0         | 0         | 29.2675   | 54.2655    | 76.8673    | 125.144    | hypothetical protein, conserved                               |
| PVX_001935 | 0         | 37.7813   | 134.579   | 172.98    | 0         | 0         | 82.7607   | 0         | 41.008    | 57.0409    | 21.5431    | 0          | endomembrane protein 70, putative                             |
| PVX_001940 | 0         | 0         | 266.734   | 0         | 0         | 274.445   | 246.047   | 148.96    | 0         | 94.2138    | 96.0727    | 0          | ATP-dependent RNA helicase, putative                          |
| PVX_001945 | 0         | 106.257   | 379.06    | 0         | 145.006   | 0         | 466.387   | 1056.54   | 57.6322   | 266.905    | 302.601    | 246.82     | deoxyribose-phosphate aldolase, putative                      |
| PVX_001950 | 10.242    | 0         | 0         | 16.3469   | 3.24512   | 0         | 0         | 21.3261   | 7.75868   | 3.59946    | 9.17338    | 0          | hypothetical protein, conserved                               |
| PVX_001955 | 0         | 0         | 44.6656   | 0         | 5.69823   | 0         | 0         | 24.9601   | 0         | 12.6361    | 32.2062    | 29.0834    | schizont egress antigen-1, putative (SEA1)                    |
| PVX_001960 | 33.4758   | 0         | 0         | 106.894   | 0         | 0         | 0         | 0         | 12.6805   | 23.5282    | 33.3149    | 0          | hypothetical protein, conserved,10b antigen, putative         |
| PVX_001965 | 20.3452   | 0         | 50.5482   | 0         | 12.8973   | 0         | 0         | 28.2462   | 0         | 21.4487    | 8.099      | 0          | RNA-binding protein, putative                                 |
| PVX_001970 | 145.339   | 0         | 362.371   | 0         | 184.833   | 0         | 0         | 0         | 220.411   | 51.042     | 231.464    | 235.953    | hypothetical protein, conserved                               |
| PVX_001975 | 65.6409   | 68.7233   | 0         | 0         | 20.812    | 0         | 0         | 45.5719   | 37.3011   | 69.1971    | 84.925     | 0          | hypothetical protein, conserved                               |
| PVX_001980 | 0         | 167.257   | 0         | 0         | 0         | 0         | 0         | 0         | 0         | 0          | 0          | 0          | zinc transporter, putative                                    |
| PVX_002480 | 0         | 0         | 0         | 0         | 0         | 0         | 0         | 0         | 0         | 0          | 0          | 0          | variable surface protein Vir12/24-related,PIR protein         |
| PVX_002485 | 0         | 180.637   | 0         | 206.794   | 41.0431   | 331.08    | 0         | 0         | 122.533   | 136.334    | 64.3675    | 0          | variable surface protein Vir12-related,PIR protein            |
| PVX_002490 | 0         | 0         | 0         | 0         | 18.9573   | 0         | 0         | 0         | 0         | 0          | 0          | 0          | variable surface protein Vir12-related,PIR protein            |
| PVX_002495 | 0         | 0         | 0         | 0         | 0         | 0         | 0         | 0         | 0         | 0          | 0          | 0          | variable surface protein Vir7-like,PIR protein                |
| PVX_002500 | 0         | 0         | 0         | 0         | 0         | 0         | 0         | 0         | 0         | 0          | 0          | 0          | tryptophan-rich antigen (Pv-fam-a)                            |
| PVX_002505 | 38.6788   | 0         | 0         | 0         | 0         | 0         | 0         | 0         | 0         | 13.591     | 0          | 0          | Plasmodium exported protein, unknown function                 |
| PVX_002507 | 0         | 40.5806   | 0         | 0         | 0         | 0         | 0         | 0         | 0         | 0          | 0          | 0          | Pv-fam-b protein                                              |
| PVX_002510 | 0         | 0         | 0         | 0         | 0         | 0         | 0         | 0         | 0         | 0          | 0          | 0          | Nucleosomal binding protein 1, putative                       |
| PVX_002512 | 0         | 39.7538   | 0         | 0         | 0         | 291.411   | 0         | 0         | 0         | 0          | 22.6671    | 0          | Plasmodium exported protein, unknown function                 |
| PVX_002515 | 0         | 43.9204   | 0         | 0         | 0         | 0         | 0         | 0         | 23.8345   | 0          | 0          | 0          | Pv-fam-b protein                                              |
| PVX_002520 | 0         | 0         | 0         | 0         | 0         | 0         | 0         | 0         | 0         | 0          | 0          | 0          | Pv-fam-b protein                                              |
| PVX_002525 | 0         | 0         | 0         | 0         | 30.3369   | 0         | 0         | 0         | 0         | 0          | 0          | 0          | Pv-fam-b protein                                              |
| PVX_002530 | 0         | 76.8361   | 0         | 0         | 0         | 0         | 0         | 0         | 0         | 38.6296    | 0          | 0          | Pv-fam-b protein                                              |
| PVX_002535 | 91.1564   | 63.6724   | 0         | 0         | 0         | 467.017   | 0         | 0         | 34.5475   | 96.0667    | 0          | 0          | Pv-fam-b protein                                              |
| PVX_002550 | 21.9488   | 45.946    | 0         | 0         | 6.95533   | 56.0897   | 50.2817   | 15.2349   | 78.9812   | 38.5674    | 15.2902    | 17.7493    | hypothetical protein, conserved                               |
| PVX_002555 | 80.1369   | 335.804   | 398.875   | 0         | 25.4376   | 0         | 245.317   | 333.97    | 91.1066   | 112.611    | 143.565    | 0          | Plasmodium exported protein, unknown function                 |
| PVX_002560 | 0         | 0         | 0         | 0         | 0         | 0         | 0         | 0         | 0         | 0          | 0          | 0          | hypothetical protein                                          |
| PVX_002565 | 0         | 0         | 0         | 0         | 0         | 0         | 0         | 0         | 0         | 0          | 25.9035    | 0          | RAD protein (Pv-fam-e)                                        |
| PVX_002570 | 112.889   | 0         | 0         | 0         | 0         | 0         | 0         | 0         | 0         | 0          | 0          | 0          | Plasmodium exported protein, unknown function                 |
| PVX_002575 | 58.5162   | 0         | 145.422   | 93.4587   | 9.27573   | 149.619   | 0         | 162.496   | 88.6708   | 61.6875    | 87.354     | 47.3447    | replication factor C subunit 1, putative                      |
| PVX_002580 | 96.4621   | 0         | 0         | 308.71    | 61.2639   | 0         | 295.446   | 0         | 0         | 33.8852    | 57.6052    | 0          | pseudouridine synthetase, putative                            |
| PVX_002585 | 0         | 0         | 711.971   | 457.565   | 45.3945   | 0         | 0         | 0         | 54.1346   | 0          | 56.8502    | 0          | ribosome associated membrane protein RAMP4, putative          |
| PVX_002590 | 447.874   | 1885.69   | 1126.28   | 0         | 143.461   | 2319.39   | 4161.9    | 3122.12   | 2041.89   | 1413.47    | 2051.49    | 1466.72    | 40S ribosomal protein S30, putative                           |
| PVX_002595 | 0         | 0         | 0         | 0         | 0         | 0         | 0         | 0         | 150.551   | 278.081    | 78.9401    | 0          | hypothetical protein, conserved                               |
| PVX_002600 | 0         | 0         | 0         | 0         | 0         | 0         | 0         | 0         | 0         | 18.6307    | 10.5546    | 85.861     | hypothetical protein, conserved                               |
| PVX_002605 | 0         | 0         | 0         | 209.064   | 41.4936   | 0         | 0         | 90.8147   | 49.5504   | 45.9426    | 65.073     | 0          | nuclear protein SkIP, putative                                |
| PVX_002610 | 0         | 10.6848   | 0         | 48.8909   | 4.85265   | 0         | 0         | 42.5141   | 5.8       | 5.3809     | 30.4763    | 0          | hypothetical protein, conserved                               |
| PVX_002615 | 127.892   | 0         | 0         | 0         | 0         | 0         | 196.052   | 0         | 193.929   | 179.675    | 178.215    | 207.527    | small nuclear ribonucleoprotein Sm D2, putative               |
| PVX_002620 | 63.1678   | 0         | 0         | 0         | 0         | 0         | 0         | 0         | 0         | 22.1933    | 50.2945    | 0          | DEAD/DEAH box helicase, putative                              |
| PVX_002625 | 0         | 0         | 0         | 324.492   | 0         | 0         | 0         | 0         | 38.4246   | 0          | 100.904    | 0          | rRNA methylase, putative                                      |
| PVX_002630 | 23.0252   | 0         | 0         | 0         | 0         | 0         | 0         | 31.9679   | 8.72227   | 24.2738    | 4.58295    | 37.2522    | hypothetical protein                                          |
| PVX_002635 | 0         | 0         | 0         | 0         | 0         | 0         | 0         | 0         | 0         | 0          | 0          | 0          | hypothetical protein                                          |
| PVX_002640 | 113.318   | 0         | 0         | 0         | 0         | 0         | 0         | 0         | 42.9529   | 119.408    | 45.115     | 0          | replication factor C subunit 2, putative                      |

| Gene ID    | Patient 1 | Patient 2 | Patient 3 | Patient 4 | Patient 5 | Patient 6 | Patient 7 | Patient 8 | Patient 9 | Patient 10 | Patient 11 | Patient 12 | Gene Description                                                             |
|------------|-----------|-----------|-----------|-----------|-----------|-----------|-----------|-----------|-----------|------------|------------|------------|------------------------------------------------------------------------------|
| Patient    |           |           |           |           |           |           |           |           |           |            |            |            |                                                                              |
| PVX_002645 | 123.624   | 0         | 0         | 131.674   | 0         | 0         | 62.995    | 114.445   | 46.8362   | 115.836    | 65.6179    | 0          | hypothetical protein, conserved                                              |
| PVX_002650 | 574.122   | 804.072   | 0         | 0         | 183.171   | 0         | 0         | 799.174   | 762.581   | 604.454    | 571.567    | 2339.52    | 40S ribosomal protein S26, putative (RPS26)                                  |
| PVX_002655 | 0         | 0         | 0         | 0         | 0         | 0         | 0         | 0         | 52.5403   | 48.6724    | 27.5886    | 0          | hypothetical protein, conserved                                              |
| PVX_002660 | 41.4537   | 14.4645   | 0         | 0         | 0         | 0         | 0         | 28.7762   | 23.5545   | 0          | 12.3764    | 0          | hypothetical protein, conserved                                              |
| PVX_002665 | 64.9559   | 45.3561   | 0         | 0         | 0         | 0         | 99.3742   | 90.2211   | 24.6133   | 0          | 64.6479    | 0          | calcium-dependent protein kinase 1, putative (CDPK1)                         |
| PVX_002670 | 162.197   | 0         | 0         | 520.046   | 51.5895   | 0         | 0         | 0         | 0         | 113.915    | 96.8692    | 263.447    | hypothetical protein, conserved                                              |
| PVX_002675 | 0         | 0         | 0         | 0         | 0         | 0         | 621.281   | 0         | 152.582   | 140.908    | 0          | 0          | AP-2 complex subunit sigma, putative                                         |
| PVX_002680 | 0         | 0         | 58.63     | 150.72    | 7.47959   | 0         | 0         | 32.7604   | 8.93848   | 16.5836    | 28.1793    | 0          | hypothetical protein, conserved                                              |
| PVX_002685 | 179.976   | 125.662   | 149.218   | 0         | 95.1683   | 0         | 275.296   | 83.3223   | 113.658   | 84.3113    | 191.063    | 0          | ATP synthase alpha chain, putative                                           |
| PVX_002690 | 0         | 0         | 0         | 0         | 10.6845   | 0         | 0         | 0         | 0         | 0          | 13.4147    | 0          | hypothetical protein, conserved                                              |
| PVX_002695 | 0         | 0         | 0         | 0         | 0         | 0         | 0         | 0         | 0         | 23.86      | 0          | 0          | hypothetical protein, conserved                                              |
| PVX_002700 | 0         | 0         | 0         | 0         | 0         | 0         | 0         | 0         | 0         | 13.1809    | 7.46646    | 0          | hypothetical protein, conserved                                              |
| PVX_002705 | 0         | 0         | 0         | 0         | 0         | 0         | 0         | 0         | 15.3928   | 7.13984    | 0          | 0          | hypothetical protein, conserved                                              |
| PVX_002710 | 0         | 0         | 0         | 160.446   | 15.923    | 0         | 0         | 69.7149   | 19.0198   | 88.1907    | 79.9367    | 81.2792    | hypothetical protein, conserved                                              |
| PVX_002715 | 0         | 29.0907   | 0         | 66.5617   | 0         | 0         | 0         | 0         | 0         | 7.3244     | 16.5941    | 0          | hypothetical protein, conserved                                              |
| PVX_002720 | 138.053   | 0         | 114.415   | 147.063   | 29.1901   | 0         | 70.3589   | 0         | 87.1747   | 80.8461    | 64.1178    | 74.4998    | vacuolar protein sorting-associated protein 45, putative                     |
| PVX_002725 | 0         | 0         | 0         | 0         | 8.28381   | 0         | 0         | 72.5631   | 39.5965   | 27.5479    | 10.4024    | 0          | hypothetical protein, conserved                                              |
| PVX_002730 | 0         | 0         | 0         | 0         | 0         | 0         | 0         | 0         | 81.2575   | 0          | 42.6499    | 0          | hypothetical protein, conserved                                              |
| PVX_002735 | 0         | 0         | 0         | 0         | 19.1789   | 0         | 0         | 41.9975   | 34.3756   | 21.2574    | 42.143     | 0          | hypothetical protein                                                         |
| PVX_002740 | 0         | 0         | 0         | 0         | 0         | 0         | 0         | 0         | 14.5691   | 0          | 26.7932    | 0          | DEAD/DEAH helicase, putative                                                 |
| PVX_002745 | 0         | 0         | 0         | 0         | 0         | 0         | 0         | 0         | 0         | 0          | 0          | 0          | palmitoyltransferase, putative (DHHC11)                                      |
| PVX_002750 | 0         | 0         | 0         | 0         | 0         | 0         | 0         | 0         | 0         | 0          | 23.3999    | 0          | origin recognition complex subunit 5, putative (ORC5)                        |
| PVX_002755 | 40.1969   | 56.1034   | 0         | 0         | 25.4816   | 102.75    | 30.7041   | 27.9036   | 15.2268   | 35.3144    | 12.0012    | 32.5144    | DNA-directed RNA polymerase II 135 kDa polypeptide, putative                 |
| PVX_002760 | 0         | 140.214   | 0         | 321.208   | 31.8716   | 0         | 0         | 278.878   | 76.0731   | 0          | 159.816    | 162.719    | hypothetical protein, conserved                                              |
| PVX_002765 | 51.0587   | 35.6459   | 0         | 0         | 16.1958   | 0         | 0         | 141.817   | 58.0364   | 35.8799    | 111.794    | 0          | hypothetical protein, conserved                                              |
| PVX_002770 | 0         | 56.3362   | 0         | 0         | 0         | 0         | 61.6867   | 56.0353   | 0         | 28.3585    | 16.0642    | 0          | hypothetical protein, conserved                                              |
| PVX_002775 | 0         | 0         | 0         | 0         | 0         | 0         | 275.514   | 0         | 0         | 0          | 35.7218    | 0          | hypothetical protein, conserved                                              |
| PVX_002780 | 0         | 0         | 0         | 0         | 0         | 0         | 0         | 0         | 47.4639   | 0          | 0          | 0          | RING zinc finger protein, putative                                           |
| PVX_002785 | 89.6837   | 125.213   | 0         | 0         | 0         | 0         | 0         | 62.2712   | 101.936   | 63.0245    | 35.7024    | 0          | ATP-dependent acyl-CoA synthetase, putative                                  |
| PVX_002790 | 0         | 0         | 0         | 0         | 0         | 0         | 0         | 0         | 0         | 0          | 0          | 0          | rhopty neck protein 6, putative (RONE)                                       |
| PVX_002795 | 0         | 27.9951   | 49.834    | 0         | 0         | 0         | 0         | 0         | 7.59805   | 14.0973    | 7.98464    | 0          | hypothetical protein, conserved                                              |
| PVX_002800 | 0         | 0         | 0         | 0         | 0         | 0         | 0         | 0         | 0         | 0          | 0          | 0          | hypothetical protein, conserved                                              |
| PVX_002805 | 0         | 0         | 0         | 0         | 6.10695   | 0         | 0         | 0         | 14.5973   | 0          | 11.5051    | 0          | calcium-dependent protein kinase 4, putative                                 |
| PVX_002810 | 0         | 0         | 0         | 0         | 0         | 0         | 0         | 176.234   | 0         | 89.0744    | 100.971    | 0          | hypothetical protein, conserved                                              |
| PVX_002815 | 41.5137   | 57.9573   | 0         | 132.652   | 13.1651   | 0         | 0         | 0         | 62.9118   | 72.9347    | 57.8418    | 0          | hypothetical protein, conserved                                              |
| PVX_002820 | 21.7547   | 0         | 0         | 0         | 0         | 0         | 0         | 0         | 0         | 15.2897    | 4.33006    | 0          | hypothetical protein                                                         |
| PVX_002825 | 0         | 0         | 0         | 0         | 65.3922   | 0         | 0         | 0         | 0         | 72.1044    | 40.8877    | 0          | 50S ribosomal protein L13, putative                                          |
| PVX_002830 | 65.264    | 30.364    | 0         | 69.476    | 13.7913   | 0         | 0         | 60.4071   | 82.409    | 53.5139    | 90.9312    | 35.1954    | protein transport protein SEC31, putative (SEC31)                            |
| PVX_002835 | 284.293   | 231.543   | 0         | 151.429   | 75.1415   | 242.433   | 72.4481   | 329.003   | 161.568   | 249.728    | 198.057    | 76.7116    | T-complex protein 1, theta subunit, putative                                 |
| PVX_002840 | 28.305    | 19.7549   | 0         | 0         | 17.9467   | 0         | 0         | 0         | 42.8908   | 19.8927    | 56.3388    | 0          | hypothetical protein, conserved                                              |
| PVX_002845 | 0         | 31.3976   | 0         | 143.733   | 0         | 0         | 0         | 62.4591   | 34.081    | 15.8036    | 26.8576    | 72.8128    | hypothetical protein, conserved                                              |
| PVX_002850 | 0         | 0         | 0         | 0         | 0         | 0         | 0         | 0         | 0         | 359.858    | 0          | 0          | hypothetical protein, conserved                                              |
| PVX_002855 | 0         | 0         | 0         | 0         | 0         | 0         | 0         | 0         | 5.32275   | 4.93821    | 5.59375    | 0          | hypothetical protein, conserved                                              |
| PVX_002860 | 0         | 50.7785   | 180.927   | 0         | 0         | 0         | 0         | 101.005   | 27.5545   | 0          | 57.896     | 0          | hypothetical protein, conserved                                              |
| PVX_002865 | 0         | 0         | 0         | 0         | 34.1768   | 0         | 0         | 149.508   | 40.7824   | 0          | 21.4183    | 0          | serine/threonine protein kinase, putative                                    |
| PVX_002867 | 0         | 0         | 4621.49   | 0         | 0         | 0         | 0         | 5015.17   | 0         | 0          | 709.378    | 0          | conserved Plasmodium protein, unknown function                               |
| PVX_002870 | 0         | 0         | 0         | 0         | 0         | 0         | 0         | 0         | 187.969   | 0          | 394.026    | 0          | hypothetical protein, conserved                                              |
| PVX_002875 | 0         | 0         | 0         | 0         | 0         | 0         | 0         | 0         | 43.282    | 80.2147    | 90.9208    | 0          | heat shock protein, putative                                                 |
| PVX_002880 | 169.895   | 0         | 0         | 0         | 0         | 0         | 0         | 64.4235   | 119.317   | 33.8225    | 276.01     | 0          | hypothetical protein, conserved                                              |
| PVX_002885 | 85.6595   | 0         | 0         | 0         | 27.1943   | 0         | 0         | 0         | 0         | 0          | 102.307    | 0          | Leu/Phe-tRNA protein transferase, putative                                   |
| PVX_002890 | 37.3706   | 0         | 0         | 119.399   | 11.85     | 191.151   | 0         | 0         | 28.3158   | 39.3943    | 52.0688    | 0          | hypothetical protein, conserved                                              |
| PVX_002895 | 0         | 69.4054   | 0         | 0         | 31.5524   | 0         | 0         | 0         | 75.3125   | 34.9004    | 19.7774    | 161.088    | hypothetical protein, conserved                                              |
| PVX_002900 | 287.872   | 0         | 0         | 0         | 0         | 0         | 0         | 200.077   | 0         | 0          | 28.6537    | 0          | secreted protein with altered thrombospondin repeat domain, putative (SPATR) |
| PVX_002905 | 8.07065   | 5.63129   | 20.0449   | 25.7646   | 7.67196   | 0         | 12.3247   | 11.2035   | 15.2848   | 19.8542    | 25.7017    | 0          | hypothetical protein, conserved                                              |
| PVX_002910 | 8.63607   | 18.0776   | 0         | 27.5701   | 10.9461   | 0         | 13.1884   | 23.977    | 6.54228   | 18.2101    | 30.9401    | 41.8996    | hypothetical protein, conserved                                              |
| PVX_002915 | 165.154   | 115.347   | 0         | 0         | 26.2137   | 0         | 252.806   | 458.864   | 187.765   | 116.039    | 131.5      | 267.649    | eukaryotic peptide chain release factor subunit 1, putative                  |
| PVX_002920 | 0         | 0         | 0         | 0         | 22.1401   | 0         | 106.75    | 193.815   | 52.874    | 122.554    | 138.872    | 0          | 50S ribosomal protein L7/L12, putative                                       |
| PVX_002925 | 0         | 0         | 0         | 0         | 6.1627    | 0         | 29.7029   | 26.9941   | 0         | 6.83273    | 19.3501    | 0          | hypothetical protein, conserved                                              |
| PVX_002930 | 0         | 0         | 309.396   | 0         | 39.4562   | 0         | 0         | 172.562   | 94.1369   | 43.6109    | 49.4347    | 0          | GDP-fucose transporter, putative                                             |
| PVX_002935 | 173.815   | 121.402   | 0         | 278.057   | 82.7739   | 0         | 0         | 241.473   | 32.9361   | 61.0605    | 69.1982    | 0          | hypothetical protein, conserved                                              |
| PVX_002940 | 230.689   | 281.866   | 0         | 368.738   | 91.4833   | 0         | 176.422   | 80.0988   | 305.932   | 263.42     | 172.195    | 93.3983    | asparagine-tRNA ligase, putative                                             |
| PVX_002945 | 60.9264   | 0         | 0         | 0         | 9.65807   | 0         | 0         | 0         | 0         | 10.7046    | 72.7617    | 0          | tyrosine kinase-like protein, putative (TKL1)                                |

| Gene ID    | Patient 1 | Patient 2 | Patient 3 | Patient 4 | Patient 5 | Patient 6 | Patient 7 | Patient 8 | Patient 9 | Patient 10 | Patient 11 | Patient 12 | Gene Description                                                    |
|------------|-----------|-----------|-----------|-----------|-----------|-----------|-----------|-----------|-----------|------------|------------|------------|---------------------------------------------------------------------|
| Patient    |           |           |           |           |           |           |           |           |           |            |            |            |                                                                     |
| PVX_002950 | 0         | 0         | 0         | 0         | 204.674   | 0         | 0         | 0         | 0         | 0          | 42.6499    | 0          | hypothetical protein, conserved                                     |
| PVX_002955 | 0         | 0         | 0         | 0         | 7.3707    | 0         | 0         | 0         | 0         | 0          | 9.25641    | 0          | hypothetical protein, conserved                                     |
| PVX_002960 | 0         | 0         | 0         | 0         | 0         | 0         | 0         | 0         | 0         | 0          | 0          | 0          | beta-ketoacyl-acyl carrier protein synthase III precursor, putative |
| PVX_002965 | 78.9353   | 0         | 196.44    | 0         | 25.0554   | 0         | 0         | 0         | 29.9133   | 0          | 15.7125    | 0          | hypothetical protein, conserved                                     |
| PVX_002970 | 0         | 106.257   | 0         | 0         | 48.3353   | 0         | 233.193   | 0         | 115.264   | 106.762    | 90.7803    | 0          | ras-related protein Rab-5A, putative (RAB5a)                        |
| PVX_002975 | 28.8432   | 0         | 0         | 0         | 18.2882   | 0         | 88.1513   | 40.0478   | 32.7799   | 30.4064    | 11.482     | 46.6727    | hypothetical protein, conserved                                     |
| PVX_003475 | 0         | 0         | 0         | 0         | 0         | 0         | 0         | 0         | 0         | 0          | 7.91545    | 16.0837    | hypothetical protein, conserved                                     |
| PVX_003485 | 0         | 0         | 0         | 0         | 0         | 0         | 0         | 0         | 0         | 0          | 41.2017    | 167.814    | variable surface protein Vir4, putative,PIR protein                 |
| PVX_003487 | 214.223   | 0         | 0         | 0         | 0         | 0         | 0         | 0         | 0         | 75.2079    | 0          | 0          | Plasmodium exported protein, unknown function                       |
| PVX_003490 | 0         | 26.6872   | 0         | 0         | 0         | 0         | 0         | 0         | 0         | 0          | 0          | 0          | VIR protein,PIR protein                                             |
| PVX_003495 | 0         | 0         | 0         | 0         | 0         | 0         | 0         | 0         | 0         | 0          | 0          | 0          | variable surface protein Vir22/24-related,PIR protein               |
| PVX_003500 | 0         | 0         | 0         | 0         | 0         | 0         | 0         | 0         | 0         | 0          | 0          | 0          | VIR protein,PIR protein                                             |
| PVX_003505 | 0         | 26.5849   | 0         | 0         | 0         | 0         | 0         | 0         | 0         | 13.3829    | 0          | 0          | variable surface protein Vir24-related,PIR protein                  |
| PVX_003510 | 0         | 0         | 0         | 0         | 0         | 0         | 0         | 0         | 0         | 0          | 0          | 0          | variable surface protein Vir24-related,PIR protein                  |
| PVX_003515 | 0         | 54.9333   | 0         | 0         | 0         | 0         | 0         | 0         | 0         | 0          | 0          | 0          | Phist protein (Pf-fam-b)                                            |
| PVX_003520 | 0         | 0         | 0         | 0         | 0         | 0         | 0         | 0         | 0         | 0          | 0          | 0          | histidine-rich knob protein homolog KPRPC, putative                 |
| PVX_003525 | 0         | 0         | 0         | 0         | 0         | 0         | 0         | 23.0049   | 0         | 0          | 3.29818    | 0          | Plasmodium exported protein, unknown function                       |
| PVX_003530 | 0         | 0         | 0         | 0         | 54.1514   | 0         | 0         | 0         | 0         | 0          | 67.7738    | 0          | hypothetical protein                                                |
| PVX_003535 | 0         | 0         | 0         | 0         | 0         | 0         | 0         | 0         | 0         | 0          | 14.1971    | 0          | Phist protein (Pf-fam-b)                                            |
| PVX_003540 | 0         | 52.8412   | 0         | 0         | 0         | 0         | 0         | 0         | 28.6734   | 0          | 15.0615    | 0          | Plasmodium exported protein (PHISc), unknown function               |
| PVX_003545 | 187.126   | 391.975   | 155.157   | 0         | 0         | 638.578   | 190.837   | 173.269   | 212.715   | 306.809    | 148.99     | 202.056    | Plasmodium exported protein, unknown function                       |
| PVX_003550 | 0         | 0         | 0         | 0         | 0         | 0         | 0         | 0         | 0         | 0          | 0          | 0          | Plasmodium exported protein, unknown function                       |
| PVX_003555 | 0         | 197.3     | 70.2513   | 90.2974   | 0         | 289.115   | 86.3955   | 39.2507   | 53.5458   | 49.669     | 16.8803    | 45.7432    | Plasmodium exported protein, unknown function                       |
| PVX_003560 | 0         | 0         | 0         | 310.725   | 30.8318   | 0         | 148.688   | 0         | 73.5955   | 34.1056    | 38.6535    | 0          | hypothetical protein                                                |
| PVX_003565 | 2455.2    | 3661.98   | 816.626   | 0         | 1249.52   | 3361.62   | 502.4     | 0         | 2296.38   | 2414.08    | 1075.31    | 0          | early transcribed membrane protein (ETRAMP)                         |
| PVX_003570 | 0         | 0         | 60.9622   | 78.3576   | 0         | 0         | 0         | 34.063    | 9.29385   | 17.2427    | 9.76648    | 0          | hypothetical protein, conserved                                     |
| PVX_003575 | 0         | 0         | 0         | 0         | 0         | 0         | 0         | 0         | 0         | 0          | 0          | 0          | octaprenyl pyrophosphate synthase, putative (OPP)                   |
| PVX_003578 | 0         | 0         | 0         | 1684.83   | 0         | 0         | 0         | 0         | 0         | 0          | 0          | 0          | conserved Plasmodium protein, unknown function                      |
| PVX_003580 | 135.441   | 0         | 0         | 0         | 0         | 0         | 0         | 0         | 0         | 0          | 0          | 0          | palmitoyltransferase, putative (DHHC12)                             |
| PVX_003585 | 16.6352   | 0         | 41.3264   | 0         | 0         | 0         | 0         | 0         | 0         | 23.3838    | 23.1774    | 0          | hypothetical protein, conserved                                     |
| PVX_003590 | 0         | 0         | 0         | 0         | 4.59321   | 0         | 0         | 0         | 0         | 0          | 0          | 0          | serine/threonine-specific protein kinase, putative                  |
| PVX_003595 | 111.814   | 39.0331   | 0         | 0         | 53.2075   | 0         | 0         | 77.6456   | 42.3662   | 78.5719    | 55.6412    | 0          | hypothetical protein, conserved                                     |
| PVX_003600 | 0         | 0         | 0         | 0         | 0         | 0         | 282.346   | 255.667   | 139.449   | 0          | 183.013    | 0          | ERCC1 nucleotide excision repair protein, putative                  |
| PVX_003605 | 0         | 0         | 0         | 563.106   | 0         | 0         | 0         | 0         | 0         | 0          | 104.852    | 0          | hypothetical protein, conserved                                     |
| PVX_003607 | 0         | 0         | 0         | 0         | 0         | 0         | 0         | 0         | 0         | 0          | 0          | 0          | tRNA Glutamine                                                      |
| PVX_003610 | 0         | 0         | 0         | 0         | 42.425    | 0         | 0         | 0         | 25.3306   | 0          | 66.5313    | 0          | hypothetical protein, conserved                                     |
| PVX_003615 | 62.3753   | 43.5528   | 0         | 199.43    | 19.791    | 0         | 0         | 0         | 23.635    | 65.7448    | 62.0793    | 0          | hypothetical protein, conserved                                     |
| PVX_003620 | 61.3491   | 0         | 152.599   | 0         | 19.4649   | 0         | 93.8454   | 170.417   | 116.23    | 86.218     | 24.4232    | 0          | hypothetical protein, conserved                                     |
| PVX_003625 | 0         | 0         | 0         | 0         | 0         | 0         | 0         | 0         | 0         | 0          | 0          | 0          | 5'-3' exonuclease, N-terminal resolvase-like domain, putative       |
| PVX_003630 | 0         | 0         | 0         | 0         | 13.1896   | 0         | 0         | 0         | 0         | 0          | 24.8354    | 0          | hypothetical protein, conserved                                     |
| PVX_003635 | 12.2296   | 0         | 0         | 0         | 0         | 0         | 0         | 0         | 0         | 0          | 0          | 0          | hypothetical protein, conserved                                     |
| PVX_003640 | 0         | 0         | 0         | 0         | 45.1056   | 0         | 217.595   | 0         | 0         | 49.8291    | 141.224    | 0          | hypothetical protein, conserved                                     |
| PVX_003645 | 0         | 0         | 0         | 0         | 0         | 0         | 0         | 0         | 0         | 0          | 0          | 0          | hypothetical protein, conserved                                     |
| PVX_003650 | 0         | 0         | 0         | 0         | 0         | 0         | 0         | 0         | 0         | 0          | 0          | 0          | dynein light polypeptide 4, axonemal, putative                      |
| PVX_003655 | 0         | 0         | 0         | 0         | 0         | 0         | 101.818   | 0         | 25.2176   | 0          | 52.9876    | 0          | aspartate aminotransferase, mitochondrial precursor, putative       |
| PVX_003660 | 0         | 0         | 0         | 0         | 0         | 0         | 0         | 0         | 19.4406   | 0          | 10.2145    | 0          | 5'-3' exoribonuclease, putative                                     |
| PVX_003665 | 0         | 47.8593   | 0         | 0         | 0         | 0         | 104.866   | 0         | 51.9422   | 96.317     | 81.8555    | 111.028    | hexose transporter                                                  |
| PVX_003670 | 0         | 0         | 0         | 0         | 0         | 0         | 0         | 0         | 29.42     | 0          | 0          | 0          | 3'-5' exonuclease domain containing protein                         |
| PVX_003675 | 0         | 0         | 0         | 0         | 0         | 0         | 0         | 0         | 0         | 0          | 18.2011    | 148.218    | ubiquinone biosynthesis methyltransferase, putative                 |
| PVX_003680 | 0         | 0         | 0         | 0         | 29.9772   | 0         | 0         | 0         | 0         | 16.6046    | 9.40638    | 0          | hypothetical protein                                                |
| PVX_003685 | 0         | 0         | 0         | 0         | 19.385    | 0         | 0         | 0         | 0         | 0          | 36.4847    | 0          | hypothetical protein                                                |
| PVX_003690 | 0         | 0         | 0         | 0         | 0         | 0         | 0         | 0         | 0         | 0          | 0          | 0          | hypothetical protein, conserved                                     |
| PVX_003695 | 0         | 0         | 0         | 0         | 13.6009   | 0         | 0         | 0         | 0         | 0          | 17.0727    | 0          | hypothetical protein, conserved                                     |
| PVX_003700 | 53.3093   | 148.873   | 0         | 0         | 50.7321   | 272.808   | 81.5262   | 74.036    | 60.5956   | 37.4611    | 74.278     | 0          | hypothetical protein, conserved                                     |
| PVX_003705 | 913.96    | 0         | 0         | 0         | 0         | 0         | 0         | 0         | 173.628   | 0          | 637.068    | 0          | DNA-directed RNA polymerase II 16 kDa subunit, putative             |
| PVX_003710 | 341.894   | 0         | 857.19    | 0         | 0         | 0         | 0         | 0         | 0         | 0          | 0          | 0          | hypothetical protein                                                |
| PVX_003715 | 0         | 0         | 124.617   | 0         | 15.8962   | 0         | 0         | 0         | 0         | 17.6085    | 39.9012    | 81.1424    | hypothetical protein, conserved                                     |
| PVX_003720 | 120.651   | 0         | 300.607   | 386.384   | 38.3358   | 0         | 0         | 167.67    | 0         | 42.3769    | 24.0174    | 0          | hypothetical protein, conserved                                     |
| PVX_003725 | 0         | 0         | 319.172   | 0         | 0         | 0         | 0         | 178.001   | 0         | 0          | 0          | 0          | PH domain containing protein                                        |
| PVX_003730 | 24.799    | 34.6144   | 308.107   | 158.41    | 78.6119   | 0         | 75.7815   | 103.294   | 93.9431   | 95.8596    | 187.569    | 120.372    | 26S proteasome regulatory subunit RPN1, putative (RPN1)             |
| PVX_003735 | 0         | 14.804    | 0         | 0         | 6.72393   | 0         | 0         | 29.4517   | 0         | 7.45459    | 21.1114    | 0          | DNA repair endonuclease, putative,RAD2 endonuclease, putative       |
| PVX_003740 | 0         | 115.709   | 0         | 0         | 0         | 0         | 0         | 0         | 0         | 0          | 32.9467    | 0          | cysteine desulfuration protein SufE, putative (SufE)                |

| Gene ID    | Patient 1 | Patient 2 | Patient 3 | Patient 4 | Patient 5 | Patient 6 | Patient 7 | Patient 8 | Patient 9 | Patient 10 | Patient 11 | Patient 12 | Gene Description                                                                         |
|------------|-----------|-----------|-----------|-----------|-----------|-----------|-----------|-----------|-----------|------------|------------|------------|------------------------------------------------------------------------------------------|
| PVX_003745 | 0         | 0         | 0         | 0         | 0         | 0         | 0         | 0         | 0         | 0          | 0          | 0          | pantothenate transporter, putative (PAT)                                                 |
| PVX_003750 | 25.6327   | 8.94315   | 0         | 0         | 12.1846   | 0         | 19.5748   | 17.7923   | 67.9654   | 18.0161    | 12.7547    | 0          | pentafunctional AROM polypeptide, putative (AROM)                                        |
| PVX_003755 | 29.2964   | 20.4472   | 0         | 0         | 9.28789   | 149.815   | 0         | 40.6773   | 0         | 0          | 52.481     | 0          | hypothetical protein, conserved                                                          |
| PVX_003760 | 0         | 0         | 1893.53   | 0         | 0         | 0         | 0         | 0         | 0         | 0          | 0          | 0          | transcription factor, putative                                                           |
| PVX_003765 | 0         | 52.4418   | 0         | 0         | 0         | 0         | 0         | 208.625   | 28.4567   | 79.1452    | 59.7909    | 0          | adenylosuccinate lyase (ASL)                                                             |
| PVX_003770 | 0         | 0         | 0         | 0         | 0         | 0         | 0         | 0         | 35.3031   | 0          | 0          | 0          | merozoite surface protein 5                                                              |
| PVX_003775 | 0         | 0         | 0         | 0         | 0         | 0         | 0         | 0         | 0         | 0          | 0          | 0          | merozoite surface protein 4, putative                                                    |
| PVX_003780 | 18.7352   | 13.0743   | 0         | 59.8278   | 5.93811   | 0         | 0         | 26.0106   | 14.1939   | 6.58386    | 22.3743    | 0          | hypothetical protein, conserved                                                          |
| PVX_003785 | 0         | 0         | 0         | 0         | 0         | 0         | 0         | 351.033   | 0         | 0          | 0          | 0          | iron-sulfur cluster assembly accessory protein, putative                                 |
| PVX_003790 | 0         | 0         | 0         | 0         | 0         | 0         | 0         | 0         | 0         | 0          | 0          | 0          | serine-repeat antigen (SERA), putative,serine-repeat antigen protein precursor, putative |
| PVX_003795 | 0         | 0         | 0         | 0         | 0         | 0         | 0         | 0         | 0         | 0          | 0          | 0          | serine-repeat antigen (SERA),serine-repeat antigen protein precursor, putative           |
| PVX_003800 | 31.4923   | 0         | 0         | 0         | 9.98459   | 0         | 0         | 43.7272   | 71.5825   | 11.0662    | 18.8049    | 0          | serine-repeat antigen (SERA),serine-repeat antigen protein precursor, putative           |
| PVX_003805 | 0         | 0         | 0         | 0         | 0         | 0         | 0         | 0         | 10.5689   | 0          | 0          | 0          | serine-repeat antigen (SERA), putative                                                   |
| PVX_003810 | 65.7615   | 0         | 0         | 0         | 0         | 0         | 0         | 0         | 0         | 0          | 0          | 0          | serine-repeat antigen 5 (SERA), putative                                                 |
| PVX_003815 | 0         | 0         | 0         | 0         | 0         | 0         | 0         | 0         | 0         | 0          | 0          | 0          | serine-repeat antigen (SERA), truncated, putative                                        |
| PVX_003820 | 29.1818   | 0         | 0         | 0         | 0         | 0         | 0         | 0         | 0         | 0          | 0          | 0          | serine-repeat antigen 4 (SERA), putative                                                 |
| PVX_003825 | 31.7267   | 0         | 0         | 0         | 0         | 0         | 0         | 0         | 0         | 0          | 0          | 0          | serine-repeat antigen 4 (SERA),cysteine protease, putative                               |
| PVX_003830 | 0         | 0         | 0         | 0         | 0         | 0         | 0         | 0         | 0         | 0          | 0          | 0          | serine-repeat antigen 5 (SERA)                                                           |
| PVX_003835 | 29.1533   | 0         | 0         | 0         | 0         | 0         | 0         | 0         | 0         | 0          | 11.6055    | 0          | serine-repeat antigen 1 (SERA)                                                           |
| PVX_003840 | 0         | 0         | 0         | 0         | 0         | 0         | 0         | 0         | 0         | 10.6179    | 12.0287    | 0          | serine-repeat antigen 3 (SERA)                                                           |
| PVX_003845 | 26.254    | 18.323    | 0         | 0         | 0         | 0         | 0         | 0         | 0         | 36.903     | 26.1282    | 0          | serine-repeat antigen 4 (SERA)                                                           |
| PVX_003850 | 0         | 0         | 0         | 0         | 0         | 0         | 0         | 0         | 0         | 0          | 0          | 0          | serine-repeat antigen 2 (SERA)                                                           |
| PVX_003855 | 0         | 14.1114   | 0         | 0         | 0         | 103.378   | 0         | 28.0739   | 0         | 7.10597    | 16.0992    | 32.7128    | hypothetical protein, conserved                                                          |
| PVX_003860 | 0         | 0         | 0         | 407.904   | 0         | 653.136   | 195.211   | 0         | 96.5501   | 134.182    | 152.103    | 0          | KRR1 small subunit processome component, putative (KRR1)                                 |
| PVX_003865 | 0         | 14.4144   | 0         | 0         | 6.54693   | 0         | 0         | 57.3532   | 31.2972   | 43.5508    | 28.7783    | 33.4154    | hypothetical protein, conserved                                                          |
| PVX_003870 | 16.1577   | 0         | 40.1395   | 0         | 5.12085   | 0         | 0         | 0         | 12.2409   | 22.7126    | 19.296     | 26.1363    | hypothetical protein, conserved                                                          |
| PVX_003875 | 0         | 0         | 0         | 0         | 0         | 0         | 0         | 0         | 0         | 0          | 0          | 0          | hypothetical protein                                                                     |
| PVX_003880 | 0         | 0         | 0         | 0         | 0         | 0         | 616.966   | 279.229   | 152.293   | 70.4885    | 159.881    | 0          | acyl carrier protein, putative (ACP)                                                     |
| PVX_003885 | 0         | 87.7174   | 0         | 0         | 19.9301   | 0         | 0         | 0         | 47.602    | 132.412    | 87.5211    | 0          | ribosome-recycling factor, putative (RRF1)                                               |
| PVX_003890 | 0         | 70.0281   | 0         | 0         | 0         | 0         | 0         | 0         | 75.9878   | 105.639    | 59.8639    | 0          | hypothetical protein, conserved                                                          |
| PVX_003895 | 199.87    | 0         | 0         | 0         | 0         | 0         | 0         | 0         | 0         | 0          | 79.5832    | 0          | hypothetical protein, conserved                                                          |
| PVX_003900 | 13.8862   | 9.68985   | 0         | 0         | 0         | 0         | 0         | 38.5555   | 0         | 4.87998    | 0          | 0          | 6-cysteine protein                                                                       |
| PVX_003905 | 11.1258   | 7.76335   | 0         | 0         | 0         | 0         | 0         | 0         | 0         | 0          | 2.21446    | 0          | 6-cysteine protein                                                                       |
| PVX_003910 | 0         | 0         | 111.656   | 0         | 0         | 0         | 0         | 0         | 0         | 31.5597    | 35.7562    | 0          | phospholipase A2, putative                                                               |
| PVX_003915 | 106.698   | 298.171   | 0         | 0         | 33.8908   | 0         | 163.451   | 0         | 202.209   | 149.915    | 212.395    | 0          | hypothetical protein, conserved                                                          |
| PVX_003920 | 0         | 0         | 337.598   | 0         | 43.0509   | 0         | 0         | 0         | 0         | 0          | 26.9622    | 0          | 2C-methyl-D-erythritol 2,4-cyclodiphosphate synthase, putative                           |
| PVX_003925 | 129.818   | 0         | 0         | 0         | 0         | 0         | 99.3019   | 0         | 98.3817   | 205.243    | 103.362    | 0          | hypothetical protein, conserved                                                          |
| PVX_003930 | 0         | 0         | 0         | 0         | 0         | 0         | 0         | 0         | 0         | 0          | 0          | 0          | hypothetical protein                                                                     |
| PVX_003935 | 0         | 0         | 0         | 0         | 0         | 0         | 0         | 0         | 0         | 0          | 11.4012    | 0          | amine transporter, putative                                                              |
| PVX_003940 | 0         | 211.566   | 0         | 0         | 19.2273   | 0         | 0         | 84.1692   | 68.8876   | 21.2919    | 24.1254    | 0          | RING zinc finger protein, putative                                                       |
| PVX_003945 | 376.304   | 300.252   | 534.752   | 171.835   | 136.425   | 550.211   | 328.852   | 522.613   | 427.737   | 642.193    | 363.813    | 261.147    | ATP-dependent RNA helicase UAP56, putative (UAP56)                                       |
| PVX_003950 | 0         | 1082.12   | 0         | 0         | 499.598   | 0         | 0         | 0         | 582.496   | 1063.13    | 911.16     | 0          | transport protein SEC61 gamma subunit, putative                                          |
| PVX_003955 | 1932.45   | 2729.32   | 7391.9    | 3167.05   | 313.281   | 0         | 0         | 4060.88   | 4419.98   | 2365.92    | 3080.8     | 0          | 60S ribosomal protein L37a, putative                                                     |
| PVX_003960 | 0         | 19.1303   | 34.0505   | 43.7668   | 8.68815   | 0         | 0         | 38.0594   | 10.3846   | 14.4516    | 35.4683    | 0          | hypothetical protein, conserved                                                          |
| PVX_003965 | 0         | 0         | 189.732   | 0         | 24.2      | 0         | 0         | 211.827   | 0         | 26.7861    | 91.0618    | 0          | transporter, putative                                                                    |
| PVX_003970 | 0         | 0         | 0         | 694.556   | 0         | 0         | 0         | 0         | 0         | 0          | 129.187    | 0          | 50S ribosomal protein L33, putative                                                      |
| PVX_003975 | 26.9904   | 0         | 0         | 0         | 8.55631   | 0         | 0         | 0         | 51.123    | 18.9689    | 26.861     | 0          | hypothetical protein, conserved                                                          |
| PVX_003980 | 0         | 0         | 0         | 0         | 0         | 0         | 0         | 0         | 0         | 0          | 15.6572    | 0          | hypothetical protein, conserved                                                          |
| PVX_003985 | 0         | 0         | 0         | 0         | 11.7587   | 0         | 0         | 51.4648   | 14.0398   | 52.0647    | 7.37484    | 120.056    | syntaxin, putative                                                                       |
| PVX_003990 | 0         | 0         | 0         | 0         | 0         | 0         | 0         | 0         | 67.2444   | 0          | 0          | 0          | hypothetical protein, conserved                                                          |
| PVX_003995 | 0         | 87.1295   | 310.694   | 0         | 0         | 0         | 0         | 0         | 189.061   | 131.379    | 124.103    | 0          | hypothetical protein, conserved                                                          |
| PVX_004495 | 0         | 0         | 0         | 0         | 0         | 0         | 0         | 0         | 0         | 0          | 0          | 0          | VIR protein,PIR protein                                                                  |
| PVX_004503 | 0         | 0         | 0         | 0         | 0         | 0         | 0         | 0         | 0         | 0          | 7.45509    | 0          | VIR protein,PIR protein                                                                  |
| PVX_004505 | 0         | 0         | 0         | 0         | 0         | 0         | 0         | 0         | 0         | 0          | 0          | 0          | hypothetical protein                                                                     |
| PVX_004510 | 0         | 0         | 0         | 0         | 31.6581   | 0         | 0         | 0         | 0         | 0          | 0          | 0          | variable surface protein Vir4/14-related,PIR protein                                     |
| PVX_004515 | 188.503   | 395.503   | 0         | 0         | 0         | 0         | 0         | 0         | 71.489    | 66.1869    | 0          | 0          | RAD protein (Pv-fam-e)                                                                   |
| PVX_004520 | 0         | 0         | 0         | 322.295   | 0         | 0         | 0         | 0         | 0         | 106.114    | 60.1333    | 0          | variable surface protein Vir4, putative,PIR protein                                      |
| PVX_004525 | 0         | 0         | 0         | 0         | 0         | 0         | 0         | 0         | 0         | 36.6064    | 0          | 0          | variable surface protein Vir16/32-related,PIR protein                                    |
| PVX_004530 | 0         | 0         | 0         | 0         | 0         | 0         | 0         | 0         | 0         | 28.3814    | 0          | 0          | VIR protein,PIR protein                                                                  |
| PVX_004535 | 149.81    | 104.62    | 0         | 0         | 0         | 0         | 0         | 0         | 56.7704   | 131.578    | 59.6407    | 0          | variable surface protein Vir, putative,PIR protein                                       |
| PVX_004536 | 0         | 0         | 0         | 0         | 0         | 0         | 0         | 0         | 0         | 0          | 0          | 0          | Plasmodium exported protein, unknown function                                            |
| PVX_004537 | 0         | 0         | 0         | 0         | 0         | 0         | 0         | 0         | 22.7927   | 0          | 0          | 0          | VIR protein,PIR protein                                                                  |

| Gene ID    | Patient 1 | Patient 2 | Patient 3 | Patient 4 | Patient 5 | Patient 6 | Patient 7 | Patient 8 | Patient 9 | Patient 10 | Patient 11 | Patient 12 | Gene Description                                      |
|------------|-----------|-----------|-----------|-----------|-----------|-----------|-----------|-----------|-----------|------------|------------|------------|-------------------------------------------------------|
| Patient    |           |           |           |           |           |           |           |           |           |            |            |            |                                                       |
| PVX_004539 | 0         | 120.002   | 0         | 274.846   | 54.5456   | 0         | 0         | 0         | 65.1131   | 60.3574    | 119.702    | 0          | variable surface protein Vir12-related,PIR protein    |
| PVX_005040 | 0         | 0         | 0         | 0         | 0         | 0         | 0         | 0         | 0         | 30.2658    | 17.1496    | 0          | hypothetical protein                                  |
| PVX_005045 | 0         | 0         | 0         | 0         | 0         | 0         | 0         | 0         | 0         | 0          | 11.66      | 0          | variable surface protein Vir12-related,PIR protein    |
| PVX_005050 | 0         | 0         | 0         | 0         | 0         | 0         | 0         | 0         | 0         | 0          | 0          | 0          | variable surface protein Vir22/23-related,PIR protein |
| PVX_005055 | 0         | 19.8264   | 0         | 0         | 0         | 0         | 0         | 0         | 0         | 19.9545    | 0          | 0          | VIR protein,PIR protein                               |
| PVX_005057 | 78.8657   | 0         | 0         | 0         | 0         | 403.9     | 0         | 0         | 0         | 0          | 15.6986    | 0          | VIR protein,PIR protein                               |
| PVX_005058 | 0         | 0         | 0         | 0         | 0         | 0         | 0         | 0         | 0         | 32.7218    | 0          | 0          | VIR protein,PIR protein                               |
| PVX_005060 | 0         | 0         | 193.196   | 0         | 0         | 0         | 0         | 0         | 0         | 0          | 0          | 0          | variable surface protein Vir12-like,PIR protein       |
| PVX_005065 | 0         | 0         | 0         | 0         | 0         | 0         | 0         | 0         | 0         | 0          | 0          | 0          | VIR protein,PIR protein                               |
| PVX_005565 | 0         | 0         | 0         | 0         | 0         | 0         | 0         | 0         | 0         | 0          | 0          | 0          | hypothetical protein                                  |
| PVX_005570 | 0         | 0         | 0         | 0         | 0         | 0         | 0         | 0         | 0         | 0          | 0          | 0          | hypothetical protein                                  |
| PVX_005575 | 0         | 0         | 0         | 0         | 0         | 0         | 0         | 0         | 0         | 0          | 0          | 0          | hypothetical protein                                  |
| PVX_005580 | 0         | 0         | 0         | 0         | 0         | 0         | 0         | 0         | 0         | 0          | 0          | 0          | variable surface protein Vir4, putative               |
| PVX_006080 | 0         | 0         | 0         | 0         | 0         | 0         | 0         | 0         | 0         | 0          | 11.6372    | 0          | variable surface protein Vir18-related                |
| PVX_006580 | 0         | 0         | 0         | 0         | 0         | 0         | 0         | 0         | 0         | 0          | 0          | 0          | variable surface protein Vir14, putative              |
| PVX_007080 | 0         | 0         | 0         | 0         | 0         | 0         | 0         | 0         | 0         | 0          | 0          | 0          | variable surface protein Vir 28, putative             |
| PVX_007085 | 0         | 0         | 0         | 0         | 0         | 0         | 0         | 0         | 0         | 0          | 0          | 0          | variable surface protein Vir24-related                |
| PVX_007585 | 0         | 0         | 0         | 0         | 0         | 0         | 0         | 0         | 0         | 0          | 0          | 0          | variable surface protein Vir28, putative              |
| PVX_008085 | 266.994   | 279.653   | 166.055   | 0         | 42.3616   | 0         | 102.122   | 0         | 0         | 117.254    | 66.4321    | 0          | variable surface protein Vir 14-related               |
| PVX_009090 | 0         | 0         | 0         | 0         | 0         | 0         | 0         | 0         | 0         | 0          | 0          | 0          | variable surface protein Vir14-like                   |
| PVX_009590 | 0         | 0         | 0         | 0         | 0         | 0         | 0         | 0         | 0         | 0          | 0          | 0          | variable surface protein Vir21, pseudogene, putative  |
| PVX_009595 | 0         | 0         | 0         | 0         | 0         | 0         | 0         | 0         | 0         | 0          | 0          | 0          | variable surface protein Vir22, putative              |
| PVX_009600 | 0         | 0         | 0         | 0         | 0         | 0         | 0         | 0         | 0         | 0          | 0          | 0          | variable surface protein Vir5-related                 |
| PVX_010100 | 0         | 0         | 0         | 0         | 0         | 0         | 0         | 0         | 0         | 0          | 0          | 0          | variable surface protein Vir18, putative              |
| PVX_010105 | 0         | 0         | 0         | 0         | 0         | 0         | 0         | 0         | 0         | 0          | 0          | 0          | variable surface protein Vir12-related                |
| PVX_010605 | 0         | 0         | 0         | 0         | 0         | 0         | 0         | 0         | 0         | 0          | 0          | 0          | variable surface protein Vir15, putative              |
| PVX_010610 | 0         | 0         | 0         | 0         | 0         | 0         | 0         | 0         | 0         | 0          | 0          | 0          | variable surface protein Vir14, putative              |
| PVX_011110 | 0         | 0         | 0         | 0         | 0         | 0         | 0         | 0         | 0         | 0          | 0          | 0          | variable surface protein Vir18-like                   |
| PVX_011610 | 0         | 0         | 0         | 0         | 0         | 0         | 0         | 0         | 0         | 0          | 0          | 0          | variable surface protein Vir17, putative              |
| PVX_011615 | 0         | 0         | 0         | 0         | 0         | 0         | 0         | 0         | 0         | 0          | 0          | 0          | variable surface protein vir23, putative              |
| PVX_012115 | 0         | 0         | 0         | 0         | 21.5511   | 0         | 0         | 0         | 0         | 0          | 27.0367    | 0          | variable surface protein Vir 28/6-related             |
| PVX_013120 | 0         | 0         | 0         | 0         | 0         | 0         | 0         | 0         | 0         | 0          | 0          | 0          | variable surface protein Vir18, putative              |
| PVX_013620 | 0         | 44.2943   | 0         | 0         | 0         | 0         | 0         | 0         | 0         | 0          | 12.6271    | 0          | variable surface protein Vir12-like                   |
| PVX_013625 | 0         | 0         | 0         | 0         | 0         | 0         | 0         | 0         | 0         | 0          | 18.9565    | 0          | variable surface protein Vir18, putative              |
| PVX_014125 | 0         | 0         | 0         | 0         | 0         | 0         | 0         | 0         | 0         | 0          | 0          | 0          | variable surface protein Vir6-like, pseudogene        |
| PVX_014625 | 0         | 0         | 0         | 0         | 0         | 0         | 0         | 0         | 0         | 0          | 0          | 0          | variable surface protein Vir7, putative               |
| PVX_014630 | 0         | 0         | 0         | 0         | 0         | 0         | 0         | 0         | 0         | 0          | 0          | 0          | variable surface protein Vir6, putative               |
| PVX_015130 | 0         | 0         | 0         | 0         | 0         | 0         | 0         | 0         | 0         | 0          | 0          | 0          | variable surface protein Vir18-like                   |
| PVX_015135 | 0         | 0         | 0         | 0         | 0         | 0         | 0         | 0         | 0         | 0          | 0          | 0          | variable surface protein Vir17, truncated, putative   |
| PVX_015635 | 0         | 0         | 0         | 0         | 0         | 0         | 0         | 0         | 0         | 0          | 0          | 0          | variable surface protein Vir12-like                   |
| PVX_015640 | 0         | 0         | 0         | 0         | 0         | 0         | 0         | 0         | 0         | 0          | 0          | 0          | variable surface protein Vir18-related                |
| PVX_016140 | 0         | 0         | 0         | 0         | 0         | 0         | 0         | 0         | 0         | 0          | 0          | 0          | variable surface protein Vir4, putative               |
| PVX_016640 | 0         | 0         | 0         | 0         | 0         | 0         | 0         | 0         | 0         | 0          | 0          | 0          | variable surface protein Vir18-like                   |
| PVX_017140 | 0         | 0         | 0         | 0         | 0         | 0         | 0         | 0         | 0         | 0          | 0          | 0          | variable surface protein Vir12-like                   |
| PVX_017145 | 0         | 0         | 0         | 0         | 0         | 0         | 0         | 0         | 0         | 0          | 0          | 0          | variable surface protein Vir18, putative              |
| PVX_017645 | 0         | 0         | 0         | 0         | 0         | 0         | 0         | 0         | 0         | 64.1616    | 0          | 0          | variable surface protein Vir35, putative              |
| PVX_017650 | 0         | 0         | 0         | 0         | 0         | 0         | 0         | 0         | 0         | 0          | 0          | 0          | variable surface protein Vir18, putative              |
| PVX_018150 | 0         | 0         | 0         | 0         | 0         | 0         | 0         | 0         | 0         | 0          | 0          | 0          | variable surface protein Vir18, putative              |
| PVX_018155 | 0         | 0         | 0         | 0         | 0         | 0         | 0         | 0         | 0         | 0          | 0          | 0          | variable surface protein Vir17, putative              |
| PVX_018655 | 0         | 0         | 0         | 0         | 0         | 0         | 0         | 0         | 0         | 0          | 0          | 0          | variable surface protein Vir28-like                   |
| PVX_018660 | 0         | 0         | 0         | 0         | 0         | 0         | 0         | 0         | 0         | 0          | 0          | 0          | variable surface protein Vir24-like                   |
| PVX_019160 | 0         | 0         | 0         | 0         | 0         | 0         | 0         | 0         | 0         | 0          | 0          | 0          | variable surface protein Vir17, putative              |
| PVX_019165 | 0         | 0         | 0         | 0         | 0         | 350.091   | 0         | 0         | 25.9115   | 0          | 0          | 0          | variable surface protein Vir18, putative              |
| PVX_019665 | 0         | 0         | 0         | 0         | 0         | 0         | 0         | 0         | 0         | 0          | 0          | 0          | variable surface protein Vir11, putative              |
| PVX_019670 | 0         | 0         | 0         | 0         | 0         | 0         | 0         | 0         | 0         | 0          | 0          | 0          | variable surface protein Vir12-related                |
| PVX_020170 | 0         | 0         | 0         | 0         | 0         | 0         | 0         | 0         | 0         | 0          | 0          | 0          | hypothetical protein                                  |
| PVX_020175 | 0         | 0         | 0         | 0         | 0         | 0         | 0         | 0         | 0         | 0          | 0          | 0          | Pv-fam-c protein                                      |
| PVX_020675 | 0         | 0         | 0         | 0         | 0         | 0         | 0         | 0         | 0         | 0          | 0          | 0          | variable surface protein Vir18, putative              |
| PVX_020680 | 0         | 40.5016   | 0         | 0         | 0         | 0         | 0         | 0         | 0         | 0          | 0          | 0          | variable surface protein Vir12-like                   |
| PVX_021180 | 0         | 0         | 0         | 0         | 0         | 0         | 0         | 0         | 0         | 0          | 0          | 0          | variable surface protein Vir18, putative              |
| PVX_021680 | 0         | 0         | 0         | 0         | 0         | 0         | 0         | 0         | 0         | 0          | 0          | 0          | variable surface protein Vir4, putative               |
| PVX_021685 | 0         | 0         | 0         | 0         | 0         | 0         | 0         | 0         | 0         | 0          | 0          | 0          | variable surface protein Vir5, putative               |



| Gene ID    | Patient 1 | Patient 2 | Patient 3 | Patient 4 | Patient 5 | Patient 6 | Patient 7 | Patient 8 | Patient 9 | Patient 10 | Patient 11 | Patient 12 | Gene Description                                    |
|------------|-----------|-----------|-----------|-----------|-----------|-----------|-----------|-----------|-----------|------------|------------|------------|-----------------------------------------------------|
| Patient    |           |           |           |           |           |           |           |           |           |            |            |            |                                                     |
| PVX_022185 | 59.3553   | 165.77    | 0         | 189.758   | 37.6628   | 0         | 0         | 0         | 67.4707   | 62.5626    | 129.962    | 0          | variable surface protein Vir12-related              |
| PVX_022685 | 105.925   | 18.4879   | 0         | 0         | 0         | 271.029   | 0         | 0         | 60.2009   | 9.30433    | 0          | 0          | variable surface protein Vir24-related              |
| PVX_023185 | 0         | 0         | 0         | 0         | 0         | 0         | 0         | 0         | 0         | 0          | 0          | 0          | variable surface protein Vir12-related              |
| PVX_023685 | 0         | 0         | 0         | 0         | 0         | 0         | 0         | 0         | 0         | 0          | 0          | 0          | variable surface protein Vir7, putative             |
| PVX_024185 | 0         | 0         | 0         | 0         | 0         | 0         | 0         | 0         | 0         | 0          | 0          | 0          | variable surface protein Vir6-like                  |
| PVX_024685 | 84.6868   | 0         | 0         | 0         | 0         | 0         | 0         | 0         | 64.1883   | 59.5011    | 33.715     | 0          | variable surface protein Vir12-related              |
| PVX_024690 | 0         | 0         | 0         | 0         | 0         | 0         | 0         | 0         | 0         | 0          | 0          | 0          | variable surface protein Vir12-related              |
| PVX_025190 | 0         | 0         | 689.606   | 0         | 0         | 0         | 0         | 0         | 0         | 0          | 0          | 0          | Pvstp1, truncated, putative                         |
| PVX_025690 | 0         | 0         | 0         | 0         | 0         | 0         | 0         | 0         | 0         | 0          | 0          | 0          | variable surface protein Vir21, putative            |
| PVX_026190 | 0         | 0         | 0         | 0         | 0         | 0         | 0         | 0         | 0         | 0          | 0          | 0          | variable surface protein Vir14, putative            |
| PVX_026690 | 0         | 0         | 0         | 0         | 0         | 0         | 0         | 0         | 0         | 0          | 0          | 0          | variable surface protein Vir6, putative             |
| PVX_027190 | 0         | 0         | 0         | 0         | 0         | 0         | 0         | 0         | 0         | 0          | 0          | 0          | hypothetical protein                                |
| PVX_027690 | 0         | 0         | 0         | 0         | 0         | 0         | 0         | 0         | 0         | 0          | 0          | 0          | variable surface protein Vir16, putative            |
| PVX_028190 | 0         | 0         | 0         | 0         | 0         | 0         | 0         | 0         | 0         | 0          | 0          | 0          | variable surface protein Vir4, putative             |
| PVX_028690 | 0         | 0         | 0         | 0         | 0         | 0         | 0         | 0         | 0         | 0          | 0          | 0          | variable surface protein Vir6, putative             |
| PVX_029190 | 0         | 0         | 0         | 0         | 0         | 0         | 0         | 0         | 0         | 0          | 0          | 0          | variable surface protein Vir14, putative            |
| PVX_029690 | 0         | 0         | 0         | 0         | 0         | 0         | 0         | 0         | 0         | 0          | 0          | 0          | variable surface protein Vir6, putative             |
| PVX_030190 | 0         | 0         | 0         | 0         | 0         | 0         | 0         | 0         | 0         | 0          | 0          | 0          | variable surface protein Vir14, truncated, putative |
| PVX_030690 | 0         | 0         | 0         | 0         | 0         | 0         | 0         | 0         | 0         | 0          | 0          | 0          | variable surface protein Vir6, putative             |
| PVX_031190 | 0         | 0         | 0         | 0         | 0         | 0         | 0         | 0         | 0         | 0          | 0          | 0          | variable surface protein Vir6, putative             |
| PVX_031690 | 0         | 0         | 0         | 0         | 0         | 0         | 0         | 0         | 0         | 0          | 0          | 0          | variable surface protein Vir30, putative            |
| PVX_032190 | 0         | 0         | 0         | 0         | 0         | 0         | 0         | 0         | 0         | 0          | 20.6562    | 0          | variable surface protein Vir28-related              |
| PVX_032690 | 0         | 0         | 0         | 0         | 0         | 0         | 0         | 0         | 0         | 0          | 0          | 0          | variable surface protein Vir7, putative             |
| PVX_033190 | 0         | 0         | 0         | 0         | 0         | 0         | 0         | 0         | 0         | 0          | 0          | 0          | variable surface protein Vir21, putative            |
| PVX_033690 | 0         | 0         | 0         | 0         | 0         | 0         | 0         | 0         | 0         | 0          | 0          | 0          | variable surface protein Vir6, truncated, putative  |
| PVX_034190 | 0         | 0         | 0         | 0         | 0         | 0         | 0         | 0         | 0         | 0          | 0          | 0          | variable surface protein Vir14-related              |
| PVX_034690 | 0         | 0         | 0         | 0         | 0         | 0         | 0         | 0         | 0         | 0          | 17.6073    | 0          | hypothetical protein                                |
| PVX_035190 | 0         | 0         | 0         | 0         | 0         | 0         | 0         | 0         | 0         | 0          | 0          | 0          | variable surface protein Vir6, truncated, putative  |
| PVX_035690 | 0         | 0         | 0         | 0         | 0         | 0         | 0         | 0         | 0         | 0          | 0          | 0          | hypothetical protein                                |
| PVX_036190 | 0         | 0         | 0         | 0         | 0         | 0         | 0         | 0         | 0         | 0          | 0          | 0          | variable surface protein Vir34, putative            |
| PVX_036690 | 0         | 645.112   | 0         | 0         | 0         | 0         | 0         | 0         | 0         | 0          | 0          | 0          | hypothetical protein                                |
| PVX_037190 | 0         | 0         | 0         | 0         | 0         | 0         | 0         | 0         | 0         | 0          | 0          | 0          | variable surface protein Vir14/24-related           |
| PVX_037690 | 0         | 0         | 0         | 0         | 0         | 0         | 0         | 0         | 0         | 0          | 0          | 0          | hypothetical protein                                |
| PVX_038190 | 0         | 0         | 0         | 0         | 0         | 0         | 0         | 0         | 0         | 0          | 0          | 0          | hypothetical protein                                |
| PVX_038690 | 0         | 0         | 0         | 0         | 0         | 0         | 0         | 0         | 0         | 0          | 0          | 0          | variable surface protein Vir35-like                 |
| PVX_039190 | 0         | 0         | 0         | 0         | 0         | 0         | 0         | 0         | 0         | 0          | 0          | 0          | variable surface protein Vir6, putative             |
| PVX_039690 | 0         | 0         | 0         | 0         | 0         | 0         | 0         | 0         | 0         | 0          | 0          | 0          | variable surface protein Vir27, truncated, putative |
| PVX_040190 | 0         | 0         | 0         | 0         | 0         | 0         | 0         | 0         | 0         | 0          | 0          | 0          | variable surface protein Vir6, truncated, putative  |
| PVX_040690 | 0         | 0         | 0         | 0         | 0         | 0         | 0         | 0         | 0         | 0          | 0          | 0          | variable surface protein Vir35, putative            |
| PVX_041190 | 0         | 0         | 0         | 0         | 0         | 0         | 0         | 0         | 0         | 0          | 0          | 0          | variable surface protein Vir35, truncated, putative |
| PVX_041690 | 0         | 0         | 0         | 0         | 0         | 0         | 0         | 0         | 0         | 0          | 0          | 0          | variable surface protein Vir12-related, truncated   |
| PVX_042190 | 0         | 0         | 0         | 0         | 0         | 0         | 0         | 0         | 0         | 0          | 0          | 0          | variable surface protein Vir12-related, truncated   |
| PVX_042690 | 0         | 0         | 0         | 0         | 0         | 0         | 0         | 0         | 0         | 0          | 0          | 0          | variable surface protein Vir30, putative            |
| PVX_043190 | 0         | 0         | 0         | 0         | 0         | 0         | 0         | 0         | 44.8275   | 41.5375    | 23.5413    | 0          | variable surface protein Vir12, truncated, putative |
| PVX_043690 | 0         | 0         | 0         | 0         | 0         | 0         | 0         | 0         | 0         | 0          | 0          | 0          | variable surface protein Vir32, truncated, putative |
| PVX_044190 | 0         | 0         | 0         | 0         | 0         | 0         | 0         | 0         | 0         | 0          | 0          | 0          | variable surface protein Vir32, putative            |
| PVX_044690 | 0         | 0         | 0         | 0         | 0         | 0         | 0         | 0         | 0         | 0          | 0          | 0          | variable surface protein Vir35, truncated, putative |
| PVX_045190 | 0         | 0         | 0         | 0         | 0         | 0         | 0         | 0         | 0         | 0          | 95.3683    | 0          | variable surface protein Vir18-related              |
| PVX_045690 | 0         | 0         | 0         | 0         | 0         | 0         | 0         | 0         | 0         | 0          | 0          | 0          | variable surface protein Vir12-related              |
| PVX_046190 | 0         | 0         | 0         | 0         | 0         | 0         | 0         | 0         | 0         | 0          | 0          | 0          | variable surface protein Vir32, putative            |
| PVX_046690 | 0         | 0         | 0         | 0         | 0         | 0         | 0         | 0         | 0         | 0          | 0          | 0          | Pvstp1, truncated, putative                         |
| PVX_047190 | 0         | 0         | 0         | 0         | 0         | 0         | 0         | 0         | 0         | 0          | 0          | 0          | variable surface protein Vir28-like                 |
| PVX_047690 | 0         | 0         | 0         | 0         | 0         | 0         | 0         | 0         | 0         | 0          | 0          | 0          | variable surface protein Vir10, truncated, putative |
| PVX_048190 | 0         | 0         | 0         | 0         | 0         | 0         | 0         | 0         | 0         | 0          | 0          | 0          | variable surface protein Vir27, truncated, putative |
| PVX_048690 | 0         | 0         | 0         | 0         | 0         | 0         | 0         | 0         | 0         | 0          | 0          | 0          | variable surface protein Vir7-like                  |
| PVX_049190 | 0         | 0         | 0         | 0         | 0         | 0         | 0         | 0         | 0         | 0          | 0          | 0          | Pv-fam-c protein                                    |
| PVX_049690 | 0         | 69.6376   | 0         | 0         | 0         | 0         | 0         | 0         | 12.5941   | 70.0339    | 0          | 0          | hypothetical protein                                |
| PVX_050190 | 0         | 0         | 0         | 0         | 0         | 0         | 0         | 0         | 0         | 38.347     | 0          | 0          | variable surface protein Vir4, putative             |
| PVX_050690 | 0         | 0         | 0         | 0         | 0         | 0         | 0         | 0         | 0         | 0          | 0          | 0          | variable surface protein Vir6, putative             |
| PVX_051190 | 0         | 0         | 0         | 0         | 0         | 0         | 0         | 0         | 0         | 0          | 0          | 0          | variable surface protein Vir23, truncated, putative |
| PVX_051690 | 0         | 0         | 0         | 0         | 0         | 0         | 0         | 0         | 0         | 0          | 0          | 0          | variable surface protein Vir32, putative            |
| PVX_052190 | 0         | 0         | 0         | 0         | 0         | 0         | 0         | 0         | 0         | 0          | 0          | 0          | variable surface protein Vir4, pseudogene, putative |

| Gene ID    | Patient 1 | Patient 2 | Patient 3 | Patient 4 | Patient 5 | Patient 6 | Patient 7 | Patient 8 | Patient 9 | Patient 10 | Patient 11 | Patient 12 | Gene Description                                       |
|------------|-----------|-----------|-----------|-----------|-----------|-----------|-----------|-----------|-----------|------------|------------|------------|--------------------------------------------------------|
| Patient    |           |           |           |           |           |           |           |           |           |            |            |            |                                                        |
| PVX_052690 | 0         | 0         | 0         | 0         | 0         | 0         | 0         | 0         | 0         | 0          | 27.9347    | 0          | variable surface protein Vir4-related, truncated       |
| PVX_053190 | 0         | 0         | 0         | 0         | 0         | 0         | 0         | 0         | 0         | 0          | 0          | 0          | variable surface protein Vir27, putative               |
| PVX_053690 | 0         | 0         | 0         | 0         | 0         | 0         | 0         | 0         | 0         | 0          | 0          | 0          | variable surface protein Vir30, putative               |
| PVX_054190 | 0         | 0         | 0         | 0         | 0         | 0         | 0         | 0         | 34.3375   | 0          | 0          | 0          | variable surface protein Vir14-related, truncated      |
| PVX_054690 | 0         | 0         | 0         | 0         | 0         | 0         | 0         | 0         | 0         | 0          | 0          | 0          | variable surface protein Vir29, truncated, putative    |
| PVX_055190 | 0         | 0         | 0         | 0         | 0         | 0         | 0         | 0         | 0         | 0          | 0          | 0          | variable surface protein Vir18, truncated, putative    |
| PVX_055690 | 0         | 0         | 0         | 0         | 0         | 0         | 0         | 0         | 0         | 83.162     | 0          | 0          | variable surface protein Vir27, truncated, putative    |
| PVX_056190 | 87.8457   | 0         | 0         | 0         | 0         | 0         | 0         | 0         | 0         | 61.7195    | 0          | 0          | variable surface protein Vir6-related                  |
| PVX_056690 | 0         | 0         | 0         | 0         | 0         | 0         | 0         | 0         | 0         | 0          | 0          | 0          | variable surface protein Vir30, truncated, putative    |
| PVX_057190 | 0         | 0         | 0         | 0         | 0         | 0         | 0         | 0         | 0         | 0          | 0          | 0          | variable surface protein Vir6, truncated, putative     |
| PVX_057690 | 0         | 0         | 0         | 0         | 0         | 0         | 0         | 0         | 0         | 0          | 0          | 0          | variable surface protein Vir33, putative               |
| PVX_058190 | 0         | 0         | 0         | 0         | 0         | 0         | 0         | 0         | 0         | 0          | 0          | 0          | variable surface protein Vir10/35, truncated, putative |
| PVX_058690 | 0         | 0         | 0         | 0         | 0         | 0         | 0         | 0         | 0         | 0          | 0          | 0          | variable surface protein Vir21, truncated, putative    |
| PVX_059190 | 0         | 0         | 0         | 0         | 0         | 0         | 0         | 0         | 0         | 0          | 0          | 0          | variable surface protein Vir6, putative                |
| PVX_059690 | 0         | 0         | 0         | 0         | 0         | 0         | 0         | 0         | 0         | 0          | 0          | 0          | variable surface protein Vir26, putative               |
| PVX_060190 | 0         | 0         | 0         | 0         | 0         | 0         | 0         | 0         | 0         | 0          | 0          | 0          | hypothetical protein                                   |
| PVX_060690 | 0         | 0         | 0         | 0         | 0         | 0         | 0         | 0         | 0         | 0          | 0          | 0          | variable surface protein Vir18-related                 |
| PVX_061190 | 0         | 0         | 0         | 0         | 0         | 0         | 0         | 0         | 0         | 38.0685    | 0          | 0          | variable surface protein Vir32, putative               |
| PVX_061690 | 0         | 0         | 0         | 0         | 0         | 0         | 0         | 0         | 0         | 0          | 0          | 0          | hypothetical protein                                   |
| PVX_062190 | 0         | 0         | 0         | 0         | 0         | 0         | 0         | 0         | 0         | 0          | 0          | 0          | variable surface protein Vir21, truncated, putative    |
| PVX_062690 | 75.4736   | 52.7074   | 0         | 0         | 23.9546   | 0         | 0         | 0         | 28.6008   | 0          | 15.0234    | 0          | variable surface protein Vir18, putative               |
| PVX_063190 | 0         | 0         | 0         | 0         | 0         | 0         | 0         | 0         | 0         | 0          | 0          | 0          | variable surface protein Vir12-related                 |
| PVX_063690 | 0         | 0         | 0         | 0         | 0         | 0         | 0         | 0         | 0         | 0          | 0          | 0          | variable surface protein Vir6-like                     |
| PVX_064190 | 0         | 0         | 0         | 0         | 0         | 0         | 0         | 0         | 0         | 0          | 0          | 0          | variable surface protein Vir7, putative                |
| PVX_064690 | 0         | 0         | 0         | 0         | 0         | 0         | 0         | 0         | 0         | 0          | 0          | 0          | variable surface protein Vir27, putative               |
| PVX_065190 | 0         | 0         | 0         | 0         | 0         | 0         | 0         | 0         | 0         | 0          | 0          | 0          | variable surface protein Vir18, truncated, putative    |
| PVX_065690 | 0         | 63.6724   | 0         | 0         | 0         | 0         | 0         | 0         | 34.5475   | 0          | 0          | 147.764    | hypothetical protein                                   |
| PVX_066190 | 0         | 0         | 0         | 0         | 0         | 0         | 0         | 104.576   | 0         | 0          | 14.9854    | 0          | variable surface protein Vir18-like                    |
| PVX_066690 | 0         | 0         | 0         | 0         | 0         | 0         | 0         | 0         | 0         | 0          | 0          | 0          | variable surface protein Vir16, pseudogene, putative   |
| PVX_067190 | 0         | 0         | 0         | 0         | 0         | 0         | 0         | 0         | 0         | 0          | 0          | 0          | variable surface protein Vir35, putative               |
| PVX_067690 | 0         | 0         | 0         | 0         | 0         | 0         | 0         | 0         | 0         | 0          | 0          | 0          | variable surface protein Vir1-like                     |
| PVX_068190 | 0         | 0         | 0         | 0         | 0         | 0         | 0         | 0         | 0         | 0          | 0          | 0          | variable surface protein Vir18, putative               |
| PVX_068690 | 0         | 0         | 0         | 0         | 0         | 0         | 0         | 0         | 0         | 0          | 0          | 0          | variable surface protein Vir18, putative               |
| PVX_069190 | 0         | 0         | 0         | 0         | 0         | 0         | 0         | 0         | 0         | 0          | 0          | 0          | variable surface protein Vir27-like, truncated         |
| PVX_069690 | 0         | 0         | 0         | 0         | 0         | 0         | 0         | 0         | 0         | 0          | 0          | 0          | variable surface protein Vir23, putative               |
| PVX_070190 | 0         | 0         | 0         | 0         | 0         | 0         | 0         | 0         | 0         | 0          | 0          | 0          | variable surface protein Vir28, truncated, putative    |
| PVX_070690 | 0         | 0         | 0         | 0         | 0         | 0         | 0         | 0         | 0         | 0          | 0          | 0          | variable surface protein Vir33, truncated, putative    |
| PVX_071190 | 0         | 0         | 0         | 0         | 0         | 0         | 0         | 0         | 0         | 0          | 0          | 0          | variable surface protein Vir28-related                 |
| PVX_071690 | 0         | 0         | 0         | 0         | 0         | 0         | 0         | 0         | 0         | 0          | 0          | 0          | variable surface protein Vir6 (truncated), putative    |
| PVX_072190 | 0         | 0         | 0         | 0         | 0         | 0         | 0         | 0         | 38.2944   | 0          | 0          | 0          | variable surface protein Vir7, putative                |
| PVX_072690 | 0         | 0         | 0         | 0         | 0         | 0         | 0         | 0         | 0         | 0          | 0          | 0          | variable surface protein Vir4/14-related               |
| PVX_073190 | 0         | 48.9857   | 0         | 0         | 0         | 0         | 0         | 0         | 0         | 0          | 0          | 0          | variable surface protein Vir6-like                     |
| PVX_073690 | 0         | 57.0411   | 0         | 0         | 0         | 0         | 0         | 0         | 30.9512   | 28.6921    | 0          | 0          | variable surface protein Vir12-related                 |
| PVX_074190 | 0         | 0         | 0         | 0         | 0         | 0         | 0         | 0         | 0         | 0          | 0          | 0          | hypothetical protein                                   |
| PVX_074690 | 0         | 28.9168   | 0         | 0         | 0         | 0         | 0         | 0         | 15.6905   | 0          | 0          | 0          | variable surface protein Vir4-related                  |
| PVX_074695 | 0         | 0         | 0         | 0         | 0         | 0         | 0         | 0         | 0         | 0          | 0          | 0          | variable surface protein Vir10, putative               |
| PVX_075195 | 0         | 0         | 0         | 0         | 0         | 0         | 0         | 0         | 0         | 0          | 0          | 0          | variable surface protein Vir26, putative               |
| PVX_075695 | 0         | 0         | 0         | 0         | 0         | 0         | 0         | 0         | 0         | 0          | 0          | 0          | variable surface protein Vir12/22/24-related           |
| PVX_076195 | 0         | 53.1109   | 0         | 0         | 0         | 0         | 0         | 0         | 0         | 0          | 0          | 0          | variable surface protein Vir12-related                 |
| PVX_076695 | 0         | 0         | 0         | 0         | 0         | 0         | 0         | 0         | 0         | 0          | 0          | 0          | variable surface protein Vir14/32-related              |
| PVX_077195 | 0         | 0         | 0         | 0         | 0         | 0         | 0         | 0         | 0         | 0          | 0          | 0          | Pvstp1, putative                                       |
| PVX_077695 | 0         | 21.7764   | 0         | 0         | 19.791    | 0         | 0         | 0         | 23.635    | 10.9575    | 12.4159    | 0          | variable surface protein Vir12-like                    |
| PVX_078195 | 0         | 0         | 0         | 0         | 0         | 0         | 0         | 0         | 0         | 0          | 0          | 0          | variable surface protein Vir12-related                 |
| PVX_078695 | 0         | 0         | 0         | 0         | 0         | 0         | 0         | 0         | 0         | 0          | 0          | 0          | variable surface protein Vir29-like                    |
| PVX_079195 | 0         | 0         | 0         | 0         | 26.2866   | 0         | 0         | 0         | 0         | 0          | 0          | 0          | variable surface protein Vir6-like                     |
| PVX_079695 | 25.1545   | 52.6661   | 0         | 80.3412   | 7.97395   | 0         | 38.4343   | 34.9249   | 19.058    | 26.5182    | 0          | 0          | hypothetical protein, conserved                        |
| PVX_079700 | 0         | 0         | 0         | 0         | 0         | 0         | 0         | 0         | 0         | 29.4166    | 16.6682    | 0          | hypothetical protein, conserved                        |
| PVX_079705 | 0         | 0         | 0         | 0         | 0         | 0         | 234.437   | 63.9375   | 59.2094   | 67.1352    | 0          | 0          | 30S ribosomal protein S16-related, putative            |
| PVX_079710 | 0         | 0         | 0         | 0         | 0         | 0         | 0         | 0         | 0         | 0          | 0          | 0          | hypothetical protein, conserved                        |
| PVX_079715 | 0         | 29.7661   | 0         | 0         | 13.523    | 0         | 0         | 0         | 32.3105   | 29.9661    | 16.9751    | 0          | hypothetical protein, conserved                        |
| PVX_079720 | 23.2942   | 0         | 0         | 0         | 0         | 0         | 0         | 16.1689   | 0         | 0          | 0          | 0          | hypothetical protein, conserved                        |
| PVX_079725 | 0         | 0         | 321.481   | 0         | 0         | 0         | 0         | 0         | 0         | 0          | 25.6795    | 0          | hypothetical protein, conserved                        |

| Gene ID    | Patient 1 | Patient 2 | Patient 3 | Patient 4 | Patient 5 | Patient 6 | Patient 7 | Patient 8 | Patient 9 | Patient 10 | Patient 11 | Patient 12 | Gene Description                                                      |
|------------|-----------|-----------|-----------|-----------|-----------|-----------|-----------|-----------|-----------|------------|------------|------------|-----------------------------------------------------------------------|
| Patient    |           |           |           |           |           |           |           |           |           |            |            |            |                                                                       |
| PVX_079730 | 28.9084   | 40.3525   | 0         | 0         | 0         | 0         | 0         | 40.1384   | 0         | 10.1584    | 17.262     | 0          | hypothetical protein, conserved                                       |
| PVX_079735 | 0         | 0         | 0         | 0         | 0         | 0         | 0         | 0         | 28.5286   | 0          | 44.9563    | 0          | XAP-5 DNA binding protein, putative                                   |
| PVX_079740 | 0         | 0         | 0         | 0         | 0         | 0         | 0         | 0         | 0         | 0          | 0          | 0          | hypothetical protein, conserved                                       |
| PVX_079745 | 0         | 0         | 0         | 0         | 0         | 0         | 0         | 28.2462   | 0         | 21.4487    | 12.1485    | 0          | hypothetical protein, conserved                                       |
| PVX_079750 | 0         | 0         | 63.2887   | 0         | 0         | 0         | 0         | 0         | 9.64834   | 0          | 15.2084    | 0          | hypothetical protein, conserved                                       |
| PVX_079755 | 0         | 0         | 0         | 0         | 0         | 0         | 0         | 87.5505   | 23.8848   | 110.732    | 50.1882    | 102.097    | phosphoenolpyruvate/phosphate translocator, putative (PPT)            |
| PVX_079760 | 0         | 0         | 0         | 0         | 0         | 0         | 0         | 0         | 142.978   | 66.1869    | 75.0561    | 0          | hypothetical protein, conserved                                       |
| PVX_079765 | 122.971   | 0         | 0         | 0         | 0         | 0         | 188.479   | 170.9     | 233.077   | 129.575    | 73.4387    | 0          | hypothetical protein, conserved                                       |
| PVX_079770 | 274.622   | 191.936   | 0         | 0         | 0         | 0         | 0         | 0         | 0         | 144.674    | 27.3346    | 0          | hypothetical protein, conserved                                       |
| PVX_079772 | 0         | 0         | 0         | 0         | 0         | 0         | 0         | 0         | 0         | 0          | 3.38467    | 0          | conserved Plasmodium protein, unknown function                        |
| PVX_079775 | 30.0843   | 0         | 0         | 0         | 19.0757   | 0         | 0         | 0         | 11.3969   | 0          | 23.9522    | 0          | hypothetical protein, conserved                                       |
| PVX_079778 | 0         | 0         | 0         | 0         | 0         | 0         | 0         | 0         | 0         | 0          | 0          | 0          | tRNA Arginine                                                         |
| PVX_079780 | 0         | 0         | 0         | 0         | 150.924   | 0         | 0         | 0         | 179.933   | 277.747    | 125.962    | 0          | cell cycle regulator protein, putative                                |
| PVX_079785 | 0         | 0         | 0         | 0         | 6.14933   | 0         | 29.6385   | 26.9356   | 14.6986   | 13.6358    | 15.4465    | 0          | hypothetical protein, conserved                                       |
| PVX_079790 | 0         | 0         | 0         | 0         | 0         | 0         | 0         | 0         | 0         | 0          | 0          | 0          | apicoplast TIC22 protein, putative                                    |
| PVX_079795 | 0         | 166.675   | 0         | 0         | 0         | 0         | 0         | 0         | 0         | 167.208    | 47.4186    | 0          | hypothetical protein, conserved                                       |
| PVX_079800 | 0         | 0         | 0         | 0         | 14.2431   | 459.527   | 0         | 62.365    | 0         | 47.3395    | 0          | 0          | T-cell immunomodulatory protein homolog precursor, putative           |
| PVX_079805 | 0         | 0         | 0         | 0         | 0         | 0         | 0         | 0         | 0         | 0          | 0          | 0          | hypothetical protein, conserved                                       |
| PVX_079810 | 63.9807   | 44.6746   | 0         | 204.572   | 20.3011   | 0         | 0         | 177.731   | 0         | 44.9576    | 12.7354    | 0          | hypothetical protein, conserved                                       |
| PVX_079815 | 0         | 61.4781   | 0         | 0         | 27.9448   | 0         | 0         | 0         | 33.3575   | 0          | 17.5208    | 0          | cyclophilin, putative                                                 |
| PVX_079820 | 104.7     | 0         | 0         | 0         | 0         | 0         | 0         | 0         | 39.6842   | 0          | 20.8419    | 0          | hypothetical protein, conserved                                       |
| PVX_079825 | 0         | 0         | 0         | 0         | 0         | 0         | 0         | 0         | 0         | 0          | 0          | 0          | F-actin capping protein, alpha subunit, putative                      |
| PVX_079830 | 0         | 0         | 0         | 0         | 0         | 0         | 0         | 0         | 0         | 0          | 0          | 0          | palmitoyltransferase, putative (DHHCT)                                |
| PVX_079835 | 0         | 0         | 0         | 0         | 0         | 0         | 0         | 0         | 0         | 0          | 0          | 0          | hypothetical protein, conserved                                       |
| PVX_079840 | 267.024   | 223.709   | 132.809   | 0         | 101.646   | 0         | 148.337   | 121.408   | 262.697   | 191.343    | 0          | 0          | eukaryotic translation initiation factor 3, subunit 6, putative       |
| PVX_079845 | 0         | 72.3604   | 0         | 110.4     | 21.9139   | 0         | 0         | 0         | 65.458    | 48.5714    | 27.5132    | 55.927     | AP-1 complex subunit beta, putative                                   |
| PVX_079850 | 402.666   | 0         | 334.549   | 0         | 42.6622   | 0         | 0         | 186.556   | 101.768   | 424.264    | 213.756    | 0          | hypothetical protein, conserved                                       |
| PVX_079855 | 40.4992   | 28.2701   | 100.679   | 129.407   | 12.8431   | 0         | 0         | 0         | 46.0305   | 14.2306    | 16.1224    | 0          | RNA helicase-1, putative                                              |
| PVX_079857 | 0         | 0         | 0         | 0         | 0         | 0         | 0         | 0         | 0         | 0          | 0          | 0          | tRNA Leucine                                                          |
| PVX_079858 | 0         | 0         | 0         | 0         | 0         | 0         | 0         | 0         | 0         | 0          | 0          | 0          | tRNA Glutamic acid                                                    |
| PVX_079860 | 0         | 0         | 0         | 0         | 0         | 0         | 0         | 0         | 0         | 0          | 0          | 0          | hypothetical protein, conserved                                       |
| PVX_079865 | 479.936   | 209.437   | 149.218   | 191.797   | 57.101    | 0         | 91.7655   | 249.967   | 454.631   | 337.245    | 298.535    | 0          | Hsc70-interacting protein, putative (HIP)                             |
| PVX_079870 | 0         | 0         | 0         | 0         | 0         | 0         | 0         | 0         | 504.19    | 279.82     | 105.824    | 0          | hypothetical protein, conserved                                       |
| PVX_079875 | 0         | 0         | 0         | 0         | 0         | 0         | 356.779   | 0         | 176.509   | 40.8895    | 0          | 0          | methionine aminopeptidase 1a, putative (METAP1a)                      |
| PVX_079880 | 131.688   | 30.6426   | 0         | 0         | 0         | 0         | 67.1103   | 0         | 49.8925   | 77.1194    | 26.212     | 71.0606    | ubiquitin carboxyl-terminal hydrolase, putative                       |
| PVX_079885 | 366.208   | 0         | 457.017   | 0         | 58.2693   | 0         | 0         | 0         | 138.877   | 128.585    | 109.358    | 297.58     | ubiquitin-conjugating enzyme E2 N, putative (UBC13)                   |
| PVX_079890 | 0         | 23.026    | 0         | 0         | 0         | 0         | 50.4189   | 45.8072   | 12.4979   | 0          | 45.9648    | 0          | DNA replication licensing factor MCM3, putative                       |
| PVX_079895 | 0         | 0         | 0         | 0         | 64.9429   | 0         | 0         | 0         | 0         | 71.6119    | 81.2161    | 0          | transmembrane emp24 domain-containing protein, putative               |
| PVX_079900 | 134.097   | 0         | 0         | 0         | 0         | 0         | 0         | 0         | 50.8131   | 70.6688    | 120.115    | 0          | hypothetical protein, conserved                                       |
| PVX_079905 | 94.8146   | 132.381   | 0         | 0         | 60.1451   | 0         | 0         | 197.506   | 53.8846   | 83.2866    | 75.4902    | 76.7523    | hypothetical protein, conserved                                       |
| PVX_079910 | 0         | 6.32432   | 22.5121   | 0         | 2.87208   | 0         | 0         | 12.5823   | 3.43315   | 3.18532    | 9.02013    | 0          | hypothetical protein, conserved                                       |
| PVX_079915 | 0         | 0         | 0         | 0         | 0         | 0         | 0         | 0         | 0         | 0          | 0          | 0          | hypothetical protein                                                  |
| PVX_079920 | 50.2524   | 0         | 62.4352   | 0         | 31.8599   | 0         | 0         | 0         | 0         | 35.318     | 55.0126    | 0          | hypothetical protein, conserved                                       |
| PVX_079925 | 100.695   | 70.3437   | 0         | 0         | 31.9794   | 0         | 0         | 139.91    | 38.165    | 106.114    | 80.1778    | 163.27     | hypothetical protein, conserved                                       |
| PVX_079930 | 132.215   | 92.3218   | 164.457   | 0         | 0         | 0         | 101.14    | 0         | 25.0498   | 162.58     | 26.3176    | 107.084    | WD domain, G-beta repeat domain containing protein                    |
| PVX_079935 | 0         | 0         | 0         | 0         | 0         | 0         | 0         | 0         | 73.202    | 22.6243    | 51.2717    | 0          | ADP-ribosylation factor GTPase-activating protein, putative (ARF-GAP) |
| PVX_079940 | 0         | 0         | 0         | 321.208   | 31.8716   | 0         | 0         | 139.439   | 76.0731   | 35.2524    | 39.954     | 0          | hypothetical protein, conserved                                       |
| PVX_079945 | 0         | 0         | 123.991   | 0         | 15.8164   | 0         | 0         | 0         | 18.8926   | 52.5607    | 39.7011    | 0          | hypothetical protein, conserved                                       |
| PVX_079950 | 0         | 0         | 0         | 0         | 0         | 0         | 0         | 0         | 0         | 0          | 0          | 0          | serine/threonine-protein kinase Nek1, putative                        |
| PVX_079955 | 0         | 0         | 0         | 0         | 0         | 0         | 0         | 0         | 0         | 0          | 25.3505    | 0          | inner membrane complex protein 1g, putative (IMC1g)                   |
| PVX_079960 | 0         | 0         | 0         | 0         | 0         | 0         | 0         | 0         | 63.1042   | 58.4393    | 66.2611    | 270.338    | hypothetical protein, conserved                                       |
| PVX_079965 | 0         | 0         | 0         | 0         | 0         | 0         | 0         | 0         | 38.0365   | 0          | 0          | 0          | RNA methyltransferase, putative                                       |
| PVX_079970 | 0         | 35.8795   | 0         | 0         | 10.8637   | 0         | 26.1799   | 23.7936   | 12.9841   | 0          | 23.8787    | 0          | hypothetical protein, conserved                                       |
| PVX_079975 | 0         | 0         | 0         | 0         | 0         | 0         | 113.489   | 0         | 28.1028   | 52.1078    | 29.5238    | 0          | G-protein coupled receptor, putative                                  |
| PVX_079980 | 65.383    | 0         | 0         | 209.064   | 0         | 0         | 0         | 0         | 0         | 0          | 26.0292    | 0          | hypothetical protein, conserved                                       |
| PVX_079985 | 0         | 0         | 45.3215   | 0         | 0         | 0         | 0         | 0         | 6.9103    | 6.41075    | 7.26197    | 29.5104    | hypothetical protein, conserved                                       |
| PVX_079990 | 95.523    | 166.713   | 118.756   | 152.643   | 45.4463   | 0         | 73.0289   | 0         | 72.3832   | 67.127     | 76.0543    | 77.3265    | long-chain fatty acid CoA ligase, putative                            |
| PVX_079995 | 0         | 0         | 0         | 0         | 0         | 0         | 0         | 0         | 0         | 0          | 5.5967     | 0          | hypothetical protein, conserved                                       |
| PVX_080000 | 0         | 27.4982   | 97.9278   | 0         | 0         | 0         | 0         | 0         | 0         | 41.5268    | 23.5235    | 127.529    | hypothetical protein, conserved                                       |
| PVX_080005 | 0         | 0         | 198.902   | 255.658   | 0         | 0         | 0         | 0         | 0         | 28.0774    | 47.7269    | 0          | hypothetical protein, conserved                                       |
| PVX_080010 | 0         | 33.6844   | 0         | 0         | 15.3041   | 0         | 0         | 0         | 54.8437   | 16.9536    | 48.0209    | 0          | hypothetical protein, conserved                                       |
| PVX_080015 | 0         | 285.603   | 0         | 0         | 130.308   | 0         | 0         | 0         | 309.337   | 142.825    | 162.189    | 0          | mitochondrial import receptor subunit TOM22, putative                 |

| Gene ID    | Patient 1 | Patient 2 | Patient 3 | Patient 4 | Patient 5 | Patient 6 | Patient 7 | Patient 8 | Patient 9 | Patient 10 | Patient 11 | Patient 12 | Gene Description                                                              |
|------------|-----------|-----------|-----------|-----------|-----------|-----------|-----------|-----------|-----------|------------|------------|------------|-------------------------------------------------------------------------------|
| Patient    |           |           |           |           |           |           |           |           |           |            |            |            |                                                                               |
| PVX_080020 | 166.42    | 0         | 0         | 0         | 0         | 0         | 0         | 231.381   | 0         | 0          | 66.2611    | 0          | 50S ribosomal protein L12, apicoplast, putative                               |
| PVX_080025 | 0         | 0         | 0         | 0         | 0         | 0         | 0         | 0         | 451.652   | 0          | 157.88     | 0          | hypothetical protein, conserved                                               |
| PVX_080030 | 33.3399   | 69.8714   | 0         | 0         | 0         | 0         | 0         | 0         | 12.6363   | 11.7114    | 66.3667    | 0          | developmentally regulated GTP-binding protein 1, putative                     |
| PVX_080035 | 80.7879   | 112.845   | 201.062   | 0         | 25.6447   | 0         | 0         | 0         | 153.079   | 85.1442    | 48.2439    | 0          | hypothetical protein, conserved                                               |
| PVX_080040 | 0         | 0         | 0         | 0         | 0         | 0         | 0         | 0         | 0         | 0          | 0          | 0          | hypothetical protein, conserved                                               |
| PVX_080045 | 0         | 19.2911   | 0         | 0         | 8.76258   | 0         | 42.2363   | 0         | 20.9419   | 0          | 0          | 89.4503    | hypothetical protein, conserved                                               |
| PVX_080050 | 56.4315   | 196.926   | 70.1183   | 180.253   | 35.7802   | 144.284   | 43.116    | 78.3528   | 171.022   | 148.725    | 106.706    | 45.6566    | karyopherin beta, putative,importin-beta 3, putative                          |
| PVX_080055 | 0         | 0         | 0         | 0         | 0         | 0         | 0         | 0         | 0         | 0          | 0          | 0          | hypothetical protein, conserved                                               |
| PVX_080060 | 36.017    | 100.559   | 89.5247   | 0         | 0         | 0         | 165.152   | 50.0119   | 40.9348   | 101.247    | 21.5069    | 58.2927    | metal transporter, putative                                                   |
| PVX_080065 | 0         | 0         | 0         | 0         | 0         | 0         | 37.975    | 0         | 37.6607   | 26.2016    | 9.89396    | 0          | hypothetical protein, conserved                                               |
| PVX_080070 | 0         | 0         | 0         | 0         | 0         | 0         | 0         | 0         | 0         | 33.2757    | 37.7124    | 153.566    | hypothetical protein, conserved                                               |
| PVX_080075 | 0         | 0         | 0         | 0         | 0         | 0         | 0         | 0         | 0         | 0          | 0          | 0          | hypothetical protein, conserved                                               |
| PVX_080080 | 129.069   | 45.0615   | 0         | 206.345   | 40.9542   | 0         | 0         | 0         | 24.4535   | 22.6732    | 51.3826    | 0          | hypothetical protein, conserved                                               |
| PVX_080085 | 0         | 0         | 913.574   | 0         | 0         | 0         | 0         | 0         | 0         | 0          | 145.028    | 594.861    | hypothetical protein, conserved                                               |
| PVX_080090 | 63.7927   | 0         | 79.2732   | 101.894   | 0         | 0         | 48.746    | 0         | 24.167    | 22.4164    | 44.4412    | 0          | hypothetical protein, conserved                                               |
| PVX_080095 | 127.136   | 88.7483   | 0         | 135.419   | 40.319    | 0         | 129.575   | 117.698   | 96.3346   | 59.5632    | 92.7882    | 0          | mitochondrial processing peptidase alpha subunit, putative                    |
| PVX_080100 | 42.6997   | 89.3965   | 53.0459   | 0         | 40.6036   | 0         | 32.6172   | 148.207   | 72.7878   | 67.5234    | 84.9896    | 34.5401    | multidrug resistance protein (MDR1)                                           |
| PVX_080105 | 0         | 11.1424   | 0         | 0         | 5.06052   | 0         | 0         | 0         | 30.2419   | 16.8339    | 25.4251    | 25.8284    | hypothetical protein, conserved                                               |
| PVX_080110 | 151.746   | 0         | 0         | 0         | 96.5061   | 0         | 232.796   | 210.949   | 57.5344   | 159.872    | 151.044    | 0          | G10 protein, putative                                                         |
| PVX_080115 | 0         | 0         | 0         | 0         | 0         | 0         | 0         | 726.709   | 99.0696   | 0          | 51.9855    | 0          | iron-sulfur cluster assembly accessory protein, putative (SufA)               |
| PVX_080120 | 0         | 0         | 0         | 0         | 0         | 0         | 0         | 0         | 26.7711   | 0          | 56.2505    | 0          | hypothetical protein, conserved                                               |
| PVX_080125 | 0         | 0         | 0         | 0         | 0         | 0         | 463.294   | 0         | 0         | 0          | 59.8451    | 0          | 50S ribosomal protein L17, apicoplast, putative (RPL17)                       |
| PVX_080130 | 3.36419   | 2.34722   | 0         | 0         | 0         | 0         | 0         | 0         | 0         | 0          | 1.33919    | 0          | hypothetical protein, conserved                                               |
| PVX_080135 | 101.957   | 71.2264   | 0         | 0         | 0         | 0         | 0         | 0         | 38.6436   | 35.8144    | 40.5914    | 0          | S-adenosylmethionine-dependent methyltransferase, putative                    |
| PVX_080140 | 0         | 141.708   | 0         | 0         | 0         | 0         | 0         | 0         | 0         | 0          | 80.6644    | 0          | transcription initiation factor TFIIID subunit 10, putative (TAF10)           |
| PVX_080145 | 0         | 0         | 0         | 0         | 0         | 0         | 0         | 0         | 0         | 0          | 0          | 0          | hypothetical protein, conserved                                               |
| PVX_080147 | 0         | 0         | 0         | 0         | 0         | 0         | 0         | 0         | 0         | 238.959    | 0          | 0          | conserved Plasmodium protein, unknown function                                |
| PVX_080150 | 0         | 0         | 0         | 0         | 0         | 0         | 0         | 0         | 0         | 0          | 0          | 0          | hypothetical protein, conserved                                               |
| PVX_080155 | 0         | 0         | 0         | 0         | 15.8962   | 0         | 0         | 0         | 18.9878   | 17.6085    | 19.9506    | 0          | hypothetical protein, conserved                                               |
| PVX_080160 | 0         | 25.7198   | 0         | 0         | 23.3679   | 0         | 0         | 51.1655   | 27.9193   | 51.7905    | 14.6685    | 0          | DEAD/DEAH box ATP-dependent RNA helicase, putative                            |
| PVX_080165 | 0         | 0         | 0         | 0         | 0         | 0         | 0         | 0         | 0         | 0          | 210.144    | 0          | hypothetical protein, conserved                                               |
| PVX_080170 | 68.3805   | 0         | 0         | 0         | 21.6995   | 0         | 0         | 0         | 77.7346   | 0          | 54.4452    | 0          | ribosomal large subunit pseudouridylylase synthase, putative                  |
| PVX_080175 | 0         | 35.1839   | 0         | 0         | 15.9858   | 0         | 0         | 0         | 38.1896   | 17.7077    | 60.1889    | 0          | hypothetical protein, conserved                                               |
| PVX_080180 | 0         | 14.8216   | 52.7688   | 67.8262   | 6.73191   | 0         | 0         | 88.4599   | 8.0453    | 22.3903    | 25.3638    | 0          | hypothetical protein, conserved                                               |
| PVX_080185 | 0         | 0         | 0         | 0         | 0         | 0         | 0         | 0         | 28.2198   | 26.1623    | 44.47      | 0          | hypothetical protein, conserved                                               |
| PVX_080190 | 0         | 0         | 0         | 0         | 12.7839   | 0         | 0         | 0         | 27.998    | 0          | 12.0417    | 0          | hypothetical protein, conserved                                               |
| PVX_080195 | 0         | 64.7153   | 115.246   | 0         | 0         | 0         | 0         | 0         | 52.6842   | 16.2864    | 27.6783    | 0          | hypothetical protein, conserved                                               |
| PVX_080200 | 403.531   | 28.1681   | 100.315   | 0         | 153.56    | 0         | 123.373   | 168.106   | 366.915   | 467.915    | 409.637    | 195.956    | adenosylhomocysteinase(S-adenosyl-L-homocystein e hydrolase), putative        |
| PVX_080205 | 0         | 10.5923   | 0         | 0         | 9.62131   | 0         | 0         | 0         | 17.2495   | 5.33436    | 15.1063    | 0          | hypothetical protein, conserved                                               |
| PVX_080210 | 33.0264   | 0         | 0         | 0         | 0         | 0         | 0         | 137.574   | 0         | 58.026     | 13.1474    | 0          | hypothetical protein, conserved                                               |
| PVX_080215 | 0         | 345.209   | 0         | 0         | 0         | 0         | 0         | 0         | 62.4071   | 57.795     | 65.5298    | 0          | bis(5'-nucleosyl)-tetrakisphosphate [asymmetric], putative                    |
| PVX_080220 | 0         | 0         | 0         | 0         | 0         | 0         | 0         | 0         | 0         | 0          | 46.7122    | 0          | phosphomethylpyrimidine kinase, putative                                      |
| PVX_080225 | 349.239   | 0         | 0         | 372.769   | 0         | 0         | 0         | 0         | 88.2544   | 40.8895    | 185.39     | 0          | hypothetical protein, conserved                                               |
| PVX_080230 | 197.227   | 0         | 0         | 0         | 62.7856   | 0         | 0         | 0         | 149.604   | 207.741    | 157.061    | 320.661    | U6 snRNA-associated Sm-like protein LSM4, putative                            |
| PVX_080235 | 47.9406   | 33.4677   | 119.202   | 0         | 30.4112   | 0         | 0         | 66.5764   | 127.146   | 134.757    | 57.2546    | 155.234    | hypothetical protein, conserved                                               |
| PVX_080240 | 60.4735   | 105.519   | 0         | 0         | 0         | 0         | 0         | 0         | 34.364    | 53.1255    | 18.0552    | 0          | protein phosphatase 2C, putative                                              |
| PVX_080245 | 1718.94   | 901.11    | 357.13    | 918.071   | 364.323   | 735.03    | 659.084   | 1991.15   | 1140.47   | 2062.6     | 1026.58    | 930.16     | 40S ribosomal protein S9, putative                                            |
| PVX_080250 | 0         | 0         | 0         | 0         | 0         | 0         | 0         | 0         | 79.9344   | 98.8134    | 97.9744    | 0          | hypothetical protein, conserved                                               |
| PVX_080255 | 22.7328   | 0         | 0         | 0         | 14.4117   | 232.455   | 0         | 0         | 25.8344   | 7.98852    | 31.6732    | 0          | hypothetical protein, conserved                                               |
| PVX_080260 | 0         | 609.976   | 0         | 558.834   | 221.81    | 0         | 267.402   | 363.979   | 364.066   | 337.471    | 556.287    | 283.096    | hypothetical protein, conserved                                               |
| PVX_080265 | 0         | 185.862   | 0         | 0         | 0         | 0         | 135.687   | 123.245   | 50.4369   | 31.1842    | 79.4939    | 71.8368    | zinc finger protein, putative                                                 |
| PVX_080270 | 0         | 0         | 0         | 0         | 0         | 0         | 0         | 0         | 29.8337   | 0          | 4.47903    | 0          | hypothetical protein, conserved                                               |
| PVX_080275 | 523.539   | 1189.1    | 652.4     | 1257.84   | 83.1962   | 671.357   | 401.317   | 363.823   | 992.354   | 1103.26    | 364.771    | 212.401    | 40S ribosomal protein S24, putative (RPS24)                                   |
| PVX_080280 | 0         | 0         | 0         | 0         | 19.7496   | 0         | 0         | 0         | 0         | 21.8692    | 37.1699    | 0          | cytochrome c oxidase assembly protein (heme A: farnesyltransferase), putative |
| PVX_080285 | 117.637   | 246.592   | 0         | 0         | 74.7512   | 0         | 0         | 0         | 445.916   | 289.234    | 210.758    | 0          | V-type proton ATPase 16 kDa proteolipid subunit, putative                     |
| PVX_080290 | 0         | 0         | 0         | 0         | 0         | 0         | 0         | 0         | 0         | 0          | 210.842    | 0          | 50S ribosomal subunit protein L14, putative                                   |
| PVX_080295 | 0         | 0         | 387.402   | 248.973   | 24.7061   | 0         | 0         | 108.126   | 88.4903   | 27.3451    | 61.9752    | 0          | hypothetical protein, conserved                                               |
| PVX_080300 | 0         | 0         | 0         | 0         | 0         | 0         | 0         | 0         | 0         | 0          | 0          | 0          | hypothetical protein, conserved                                               |
| PVX_080305 | 0         | 0         | 0         | 0         | 0         | 0         | 0         | 0         | 0         | 0          | 0          | 0          | hypothetical protein, conserved                                               |
| PVX_080310 | 0         | 0         | 0         | 0         | 0         | 0         | 0         | 0         | 0         | 0          | 0          | 0          | RNA-binding protein, putative                                                 |
| PVX_080315 | 23.9559   | 16.7186   | 0         | 76.5106   | 7.59378   | 0         | 0         | 0         | 36.2996   | 25.2549    | 66.7549    | 0          | hypothetical protein, conserved                                               |
| PVX_080320 | 0         | 0         | 0         | 0         | 0         | 0         | 0         | 0         | 0         | 11.1605    | 6.32171    | 0          | ATP-dependent RNA helicase DDX23, putative                                    |

| Gene ID    | Patient 1 | Patient 2 | Patient 3 | Patient 4 | Patient 5 | Patient 6 | Patient 7 | Patient 8 | Patient 9 | Patient 10 | Patient 11 | Patient 12 | Gene Description                                                                |
|------------|-----------|-----------|-----------|-----------|-----------|-----------|-----------|-----------|-----------|------------|------------|------------|---------------------------------------------------------------------------------|
| Patient    |           |           |           |           |           |           |           |           |           |            |            |            |                                                                                 |
| PVX_080325 | 0         | 0         | 0         | 0         | 0         | 0         | 0         | 0         | 0         | 0          | 0          | 0          | cyclin, putative                                                                |
| PVX_080330 | 62.9014   | 43.9204   | 0         | 603.345   | 59.8745   | 0         | 96.2248   | 262.097   | 95.3378   | 265.197    | 250.412    | 305.645    | proteasome subunit beta type-1, putative                                        |
| PVX_080335 | 140.546   | 0         | 0         | 0         | 0         | 0         | 0         | 0         | 53.2836   | 0          | 111.914    | 228.14     | SWIB/MDM2 domain-containing protein, putative                                   |
| PVX_080340 | 0         | 0         | 0         | 0         | 0         | 0         | 39.7539   | 0         | 9.85595   | 9.14261    | 25.8927    | 0          | hypothetical protein, conserved                                                 |
| PVX_080345 | 0         | 0         | 728.305   | 0         | 0         | 0         | 224.017   | 0         | 0         | 0          | 58.1493    | 0          | zinc finger protein, putative                                                   |
| PVX_080350 | 0         | 0         | 0         | 0         | 0         | 0         | 93.0783   | 0         | 0         | 42.7574    | 72.6716    | 98.5509    | zinc finger protein, putative                                                   |
| PVX_080355 | 0         | 0         | 0         | 0         | 6.98225   | 0         | 0         | 61.1656   | 0         | 7.7408     | 26.3065    | 0          | transcription factor with AP2 domain(s), putative (ApiAP2)                      |
| PVX_080360 | 0         | 0         | 0         | 555.441   | 0         | 0         | 0         | 0         | 0         | 0          | 68.9544    | 0          | apicortin, putative                                                             |
| PVX_080365 | 206.543   | 240.273   | 513.364   | 219.951   | 65.4888   | 0         | 105.226   | 143.397   | 273.866   | 254.019    | 198.703    | 278.558    | Eukaryotic translation initiation factor 3 subunit 9, putative                  |
| PVX_080370 | 0         | 0         | 0         | 0         | 0         | 0         | 0         | 0         | 0         | 0          | 0          | 0          | F-actin capping protein beta subunit, putative                                  |
| PVX_080375 | 0         | 0         | 0         | 0         | 0         | 0         | 0         | 0         | 0         | 14.1984    | 0          | 0          | UTP-glucose-1-phosphate uridylyltransferase, putative                           |
| PVX_080380 | 30.1552   | 21.0468   | 0         | 96.3268   | 19.1207   | 0         | 46.0825   | 0         | 57.1189   | 31.7894    | 66.0239    | 0          | FACT complex subunit SPT16, putative (FACT-L)                                   |
| PVX_080385 | 723.903   | 168.612   | 0         | 0         | 38.3358   | 0         | 0         | 0         | 91.4695   | 84.7539    | 168.122    | 0          | pre-mRNA-splicing factor (SR1)                                                  |
| PVX_080390 | 0         | 42.0566   | 0         | 0         | 0         | 0         | 0         | 0         | 0         | 0          | 23.9793    | 0          | hypothetical protein, conserved                                                 |
| PVX_080395 | 0         | 0         | 0         | 0         | 0         | 0         | 0         | 0         | 0         | 0          | 55.5922    | 113.111    | hypothetical protein, conserved                                                 |
| PVX_080400 | 1078.76   | 880.099   | 448.712   | 2883.75   | 171.633   | 923.583   | 1380.35   | 1500.04   | 818.179   | 1010.1     | 1252.77    | 292.172    | 60S ribosomal protein L12, putative                                             |
| PVX_080405 | 505.751   | 353.311   | 503.765   | 647.513   | 160.622   | 0         | 309.851   | 702.717   | 690.078   | 959.342    | 604.052    | 492.03     | 60S ribosomal protein L2, putative (RPL2)                                       |
| PVX_080410 | 12.8072   | 0         | 31.8131   | 0         | 0         | 0         | 0         | 0         | 4.8512    | 0          | 12.7456    | 0          | transcription factor with AP2 domain(s), putative (ApiAP2)                      |
| PVX_080415 | 23.3192   | 48.8225   | 57.9421   | 74.4757   | 36.9592   | 119.228   | 0         | 32.3762   | 61.8356   | 65.5566    | 37.1318    | 0          | ubiquitin carboxyl-terminal hydrolase 2, putative                               |
| PVX_080420 | 45.9205   | 16.0236   | 0         | 0         | 14.556    | 0         | 35.0793   | 31.8777   | 52.1859   | 32.2738    | 22.8501    | 0          | MB2 protein, putative                                                           |
| PVX_080425 | 0         | 0         | 0         | 0         | 0         | 0         | 0         | 0         | 0         | 0          | 0          | 0          | transporter, putative                                                           |
| PVX_080430 | 102.424   | 71.5529   | 0         | 0         | 97.5894   | 0         | 156.882   | 284.629   | 0         | 143.913    | 81.5544    | 0          | phosducin-like protein, putative (PhLP3)                                        |
| PVX_080435 | 0         | 130.658   | 0         | 0         | 19.791    | 0         | 0         | 0         | 47.27     | 43.8299    | 37.2476    | 0          | tRNA pseudouridine synthase, putative                                           |
| PVX_080440 | 664.443   | 580.699   | 828.809   | 1065.31   | 158.518   | 0         | 0         | 692.851   | 692.857   | 816.633    | 925.933    | 269.833    | 40S ribosomal protein S11, putative                                             |
| PVX_080445 | 0         | 24.4603   | 0         | 0         | 11.1116   | 0         | 0         | 0         | 13.2762   | 12.314     | 6.97526    | 0          | RAP protein, putative                                                           |
| PVX_080450 | 56.1877   | 39.2293   | 139.741   | 179.616   | 53.4751   | 287.563   | 0         | 78.0358   | 149.027   | 78.9664    | 145.394    | 0          | NLI interacting factor-like phosphatase, putative (NIF2)                        |
| PVX_080455 | 1320.13   | 0         | 0         | 4364.6    | 0         | 0         | 0         | 0         | 0         | 0          | 263.183    | 0          | BoIA-like protein, putative                                                     |
| PVX_080460 | 0         | 0         | 0         | 0         | 0         | 0         | 114.921   | 0         | 0         | 26.3817    | 14.9477    | 0          | glideosome-associated protein 40, putative (GAP40)                              |
| PVX_080465 | 0         | 0         | 0         | 0         | 0         | 0         | 0         | 26.9882   | 0         | 0          | 3.86918    | 0          | hypothetical protein, conserved                                                 |
| PVX_080470 | 0         | 0         | 0         | 0         | 0         | 0         | 0         | 0         | 0         | 0          | 0          | 0          | hypothetical protein, conserved                                                 |
| PVX_080475 | 0         | 0         | 0         | 0         | 0         | 0         | 0         | 0         | 0         | 0          | 0          | 0          | hypothetical protein, conserved                                                 |
| PVX_080480 | 0         | 24.3156   | 0         | 55.6328   | 0         | 0         | 0         | 0         | 19.7985   | 12.245     | 24.2739    | 0          | phosphatidylinositol 3-kinase, putative                                         |
| PVX_080485 | 180.155   | 0         | 449.62    | 0         | 0         | 0         | 0         | 0         | 0         | 63.2583    | 107.597    | 0          | hypothetical protein, conserved                                                 |
| PVX_080490 | 0         | 0         | 0         | 0         | 0         | 0         | 0         | 0         | 0         | 0          | 0          | 0          | rhomboid protease ROM9, putative (ROM9)                                         |
| PVX_080495 | 0         | 59.6459   | 106.212   | 0         | 13.5489   | 0         | 0         | 0         | 32.3722   | 0          | 34.015     | 0          | RNA-binding protein, putative                                                   |
| PVX_080500 | 0         | 39.8045   | 141.792   | 0         | 36.1731   | 0         | 0         | 79.1798   | 43.2032   | 0          | 56.7401    | 0          | hypothetical protein, conserved                                                 |
| PVX_080505 | 0         | 45.6982   | 0         | 0         | 20.7587   | 0         | 0         | 0         | 12.4018   | 23.0067    | 13.0319    | 0          | hypothetical protein, conserved                                                 |
| PVX_080510 | 0         | 0         | 0         | 0         | 0         | 0         | 0         | 31.5138   | 8.59837   | 0          | 0          | 0          | hypothetical protein, conserved                                                 |
| PVX_080515 | 0         | 0         | 0         | 0         | 0         | 899.952   | 269.005   | 0         | 0         | 61.5259    | 69.7646    | 0          | ribose 5-phosphate epimerase, putative                                          |
| PVX_080520 | 0         | 0         | 0         | 0         | 0         | 0         | 0         | 0         | 0         | 0          | 0          | 0          | hypothetical protein, conserved                                                 |
| PVX_080523 | 0         | 0         | 0         | 0         | 0         | 0         | 0         | 0         | 0         | 0          | 0          | 0          | tRNA Phenylalanine                                                              |
| PVX_080525 | 30.4321   | 63.7203   | 0         | 97.212    | 28.9446   | 0         | 0         | 126.764   | 46.1148   | 53.4686    | 54.5156    | 0          | aspartate-tRNA ligase, putative                                                 |
| PVX_080530 | 0         | 33.414    | 0         | 0         | 0         | 0         | 0         | 0         | 36.269    | 0          | 9.52713    | 0          | hypothetical protein, conserved                                                 |
| PVX_080535 | 0         | 0         | 0         | 97.1128   | 0         | 0         | 0         | 42.2116   | 0         | 0          | 18.1533    | 0          | ATP-dependent DNA helicase UvrD, putative (UvrD)                                |
| PVX_080540 | 0         | 0         | 0         | 0         | 0         | 0         | 0         | 104.312   | 0         | 0          | 59.7909    | 0          | tubulin tyrosine ligase-like protein 1, putative                                |
| PVX_080545 | 323.807   | 0         | 0         | 0         | 51.4958   | 0         | 0         | 0         | 122.78    | 56.8548    | 96.6939    | 0          | hypothetical protein, conserved                                                 |
| PVX_080550 | 425.392   | 0         | 531.321   | 682.931   | 67.7357   | 0         | 0         | 0         | 0         | 0          | 42.3457    | 0          | ras-related protein Rab-1A, putative (RAB1a)                                    |
| PVX_080555 | 0         | 0         | 0         | 0         | 0         | 0         | 0         | 0         | 0         | 13.8606    | 0          | 0          | 6-cysteine protein, secreted ookinete protein, putative (PSOP12)                |
| PVX_080560 | 26.629    | 0         | 66.1721   | 0         | 8.44167   | 0         | 0         | 0         | 10.0877   | 9.35749    | 47.7024    | 0          | deoxyribodipyrimidine photo-lyase, putative                                     |
| PVX_080565 | 0         | 371.801   | 0         | 0         | 0         | 0         | 0         | 0         | 201.201   | 0          | 316.263    | 0          | mitochondrial import inner membrane translocase subunit TIM16, putative (PAM16) |
| PVX_080570 | 0         | 0         | 0         | 0         | 0         | 0         | 0         | 0         | 0         | 0          | 26.8403    | 0          | GTP-binding protein, putative                                                   |
| PVX_080575 | 314.838   | 146.635   | 261.363   | 335.942   | 66.6659   | 537.888   | 321.517   | 583.291   | 755.77    | 663.549    | 292.471    | 170.183    | purine nucleoside phosphorylase, putative (PNP)                                 |
| PVX_080580 | 13.0824   | 18.2576   | 0         | 41.7699   | 4.14588   | 0         | 0         | 54.485    | 0         | 22.9875    | 28.6428    | 0          | hypothetical protein, conserved                                                 |
| PVX_080585 | 0         | 0         | 0         | 0         | 0         | 0         | 0         | 0         | 0         | 0          | 31.7148    | 0          | hypothetical protein, conserved                                                 |
| PVX_080590 | 0         | 0         | 0         | 0         | 0         | 0         | 0         | 0         | 0         | 0          | 36.0339    | 0          | hypothetical protein, conserved                                                 |
| PVX_080595 | 0         | 0         | 0         | 0         | 0         | 0         | 0         | 0         | 0         | 0          | 26.1315    | 0          | hypothetical protein, conserved                                                 |
| PVX_080600 | 0         | 0         | 0         | 0         | 0         | 0         | 0         | 0         | 35.9817   | 41.7229    | 51.991     | 0          | hypothetical protein, conserved                                                 |
| PVX_080605 | 0         | 0         | 0         | 0         | 0         | 0         | 0         | 0         | 0         | 0          | 31.2146    | 0          | orotate phosphoribosyltransferase, putative (OPRT)                              |
| PVX_080610 | 0         | 0         | 0         | 0         | 0         | 0         | 0         | 0         | 0         | 68.3442    | 38.7527    | 316.454    | ras-related protein Rab-1B, putative (RAB1b)                                    |
| PVX_080615 | 0         | 0         | 0         | 0         | 0         | 0         | 0         | 0         | 28.3158   | 13.1314    | 29.7536    | 0          | hypothetical protein, conserved                                                 |
| PVX_080617 | 0         | 0         | 0         | 0         | 0         | 0         | 0         | 0         | 0         | 0          | 9.68249    | 0          | conserved Plasmodium protein, unknown function                                  |
| PVX_080620 | 0         | 0         | 0         | 0         | 0         | 0         | 0         | 0         | 0         | 0          | 0          | 0          | hypothetical protein, conserved                                                 |

| Gene ID    | Patient 1 | Patient 2 | Patient 3 | Patient 4 | Patient 5 | Patient 6 | Patient 7 | Patient 8 | Patient 9 | Patient 10 | Patient 11 | Patient 12 | Gene Description                                                              |
|------------|-----------|-----------|-----------|-----------|-----------|-----------|-----------|-----------|-----------|------------|------------|------------|-------------------------------------------------------------------------------|
| Patient    |           |           |           |           |           |           |           |           |           |            |            |            |                                                                               |
| PVX_080625 | 0         | 0         | 227.863   | 0         | 29.062    | 0         | 140.147   | 254.327   | 34.6889   | 64.3064    | 36.4394    | 0          | CDK-activating kinase assembly factor, putative                               |
| PVX_080630 | 0         | 0         | 0         | 0         | 0         | 0         | 77.0223   | 0         | 38.1681   | 17.6977    | 30.0775    | 0          | glutathione synthetase, putative                                              |
| PVX_080635 | 254.418   | 0         | 0         | 0         | 81.1058   | 0         | 0         | 0         | 193.061   | 89.3011    | 0          | 414.313    | hypothetical protein, conserved                                               |
| PVX_080640 | 551.766   | 387.698   | 2783.19   | 0         | 531.565   | 0         | 1714.78   | 770.048   | 209.776   | 0          | 329.701    | 0          | prefoldin subunit 6, putative                                                 |
| PVX_080645 | 49.4505   | 0         | 0         | 0         | 0         | 0         | 0         | 68.6743   | 0         | 0          | 9.84301    | 0          | hypothetical protein, conserved                                               |
| PVX_080650 | 525.93    | 842.115   | 538.209   | 494.132   | 186.36    | 791.064   | 425.506   | 730.252   | 808.682   | 782.722    | 652.727    | 400.511    | inositol-3-phosphate synthase, putative (INO1)                                |
| PVX_080655 | 0         | 0         | 0         | 0         | 0         | 0         | 0         | 366.571   | 199.892   | 92.4509    | 52.4447    | 0          | EKC/KEOPS complex subunit CGI121, putative (CGI121)                           |
| PVX_080657 | 0         | 0         | 0         | 0         | 0         | 0         | 0         | 0         | 86.218    | 0          | 0          | 0          | apical rhopty neck protein, putative (ARNP)                                   |
| PVX_080660 | 2.62108   | 10.9724   | 13.0178   | 25.0986   | 5.81295   | 0         | 32.0157   | 3.63835   | 21.8408   | 13.8175    | 13.0422    | 0          | RNA pseudouridylylase synthase, putative                                      |
| PVX_080665 | 0         | 0         | 0         | 0         | 0         | 0         | 0         | 0         | 0         | 21.5545    | 0          | 99.363     | hypothetical protein, conserved                                               |
| PVX_080670 | 22.8372   | 0         | 0         | 0         | 0         | 0         | 0         | 0         | 0         | 0          | 4.54553    | 0          | hypothetical protein, conserved                                               |
| PVX_080675 | 68.6363   | 71.8607   | 0         | 0         | 10.8813   | 0         | 52.4512   | 47.6522   | 39.0036   | 36.1771    | 95.6314    | 0          | stearyl-CoA desaturase (acyl-CoA desaturase, fatty acid desaturase), putative |
| PVX_080680 | 0         | 0         | 0         | 0         | 0         | 0         | 0         | 0         | 43.8418   | 0          | 23.024     | 0          | hypothetical protein, conserved                                               |
| PVX_080685 | 558.805   | 312.341   | 0         | 715.652   | 35.5035   | 0         | 171.235   | 155.303   | 84.7249   | 196.282    | 200.228    | 543.806    | translationally controlled tumor protein, putative                            |
| PVX_080690 | 0         | 0         | 0         | 0         | 0         | 0         | 0         | 0         | 0         | 0          | 0          | 0          | WD-repeat protein, putative                                                   |
| PVX_080700 | 0         | 0         | 0         | 0         | 0         | 0         | 0         | 0         | 0         | 0          | 0          | 0          | hypothetical protein, conserved                                               |
| PVX_081200 | 0         | 0         | 0         | 0         | 0         | 0         | 0         | 0         | 0         | 0          | 0          | 0          | hypothetical protein, conserved                                               |
| PVX_081205 | 0         | 0         | 0         | 0         | 0         | 0         | 319.501   | 0         | 26.3753   | 48.9073    | 55.4192    | 112.759    | TatD-like deoxyribonuclease, putative                                         |
| PVX_081210 | 0         | 0         | 0         | 0         | 0         | 0         | 0         | 582.007   | 0         | 220.355    | 41.6526    | 0          | hypothetical protein, conserved                                               |
| PVX_081215 | 0         | 34.0147   | 121.152   | 0         | 30.9086   | 0         | 74.5023   | 135.329   | 36.9209   | 85.5986    | 87.2848    | 0          | hypothetical protein, conserved                                               |
| PVX_081220 | 0         | 423.683   | 0         | 0         | 0         | 0         | 937.868   | 0         | 229.178   | 0          | 240.063    | 0          | hypothetical protein, conserved                                               |
| PVX_081225 | 0         | 0         | 0         | 0         | 95.2098   | 0         | 229.665   | 208.122   | 56.7636   | 157.734    | 89.4132    | 0          | hypothetical protein, conserved                                               |
| PVX_081230 | 0         | 0         | 191.53    | 0         | 0         | 0         | 0         | 0         | 58.3336   | 27.0394    | 15.3206    | 0          | UMP-CMP kinase, putative                                                      |
| PVX_081235 | 44.3749   | 0         | 0         | 141.806   | 28.1469   | 0         | 0         | 0         | 16.8123   | 0          | 26.498     | 0          | hypothetical protein, conserved                                               |
| PVX_081240 | 49.5842   | 0         | 61.6044   | 0         | 15.718    | 126.764   | 0         | 0         | 0         | 17.4242    | 19.7386    | 0          | replication factor c, putative                                                |
| PVX_081245 | 0         | 0         | 0         | 0         | 70.9566   | 0         | 342.509   | 0         | 0         | 78.1997    | 177.396    | 0          | hypothetical protein, conserved                                               |
| PVX_081250 | 0         | 0         | 0         | 0         | 0         | 0         | 0         | 0         | 0         | 0          | 4.17772    | 0          | kinesin-8, putative                                                           |
| PVX_081255 | 236.281   | 496.052   | 0         | 0         | 75.2905   | 0         | 0         | 0         | 89.638    | 0          | 47.0429    | 0          | adenylate kinase-like protein 1, putative (AKLP1)                             |
| PVX_081260 | 0         | 0         | 0         | 0         | 0         | 0         | 152.675   | 0         | 113.346   | 0          | 19.8435    | 161.628    | transcription initiation factor TFIIB, putative                               |
| PVX_081265 | 182.794   | 0         | 303.117   | 584.417   | 135.325   | 0         | 186.411   | 169.256   | 392.49    | 428.156    | 351.724    | 394.741    | chromatin assembly factor 1 protein WD40 domain, putative                     |
| PVX_081270 | 41.3962   | 28.8888   | 0         | 66.0996   | 13.1211   | 0         | 31.6208   | 0         | 39.203    | 14.5472    | 0          | 0          | phosphatidylinositol-4-phosphate 5-kinase, putative (PIP5K)                   |
| PVX_081275 | 0         | 28.1085   | 0         | 0         | 6.38331   | 0         | 30.7664   | 0         | 7.62884   | 0          | 12.0255    | 0          | bromodomain protein, putative                                                 |
| PVX_081277 | 80.5148   | 281.45    | 0         | 258.143   | 76.8251   | 0         | 247.111   | 0         | 152.645   | 84.8222    | 96.1718    | 0          | DNA-directed RNA polymerase 2, putative                                       |
| PVX_081280 | 0         | 0         | 0         | 0         | 133.997   | 0         | 0         | 1166.97   | 159.015   | 0          | 0          | 0          | FAD-linked sulfhydryl oxidase ERV1, putative (ERV1)                           |
| PVX_081285 | 168.24    | 0         | 104.563   | 0         | 0         | 0         | 0         | 58.4065   | 47.805    | 14.7789    | 16.7437    | 68.0848    | selenocysteine-specific elongation factor selB homologue, putative            |
| PVX_081290 | 178.36    | 0         | 0         | 0         | 0         | 0         | 0         | 0         | 0         | 0          | 71.0163    | 0          | hypothetical protein                                                          |
| PVX_081295 | 0         | 0         | 0         | 0         | 0         | 0         | 0         | 0         | 0         | 0          | 26.2636    | 0          | hypothetical integral membrane protein, DUF56 family, putative                |
| PVX_081300 | 237.579   | 0         | 147.73    | 189.884   | 75.3756   | 0         | 90.8502   | 0         | 90.0207   | 104.34     | 189.16     | 0          | phenylalanyl-tRNA synthetase beta chain, putative                             |
| PVX_081305 | 0         | 0         | 323.823   | 0         | 0         | 0         | 0         | 0         | 0         | 136.907    | 77.5977    | 421.706    | hypothetical protein, conserved                                               |
| PVX_081307 | 0         | 0         | 0         | 0         | 0         | 0         | 0         | 538.042   | 0         | 135.45     | 153.793    | 0          | cold-shock protein, putative                                                  |
| PVX_081310 | 0         | 0         | 0         | 0         | 0         | 0         | 498.813   | 900.562   | 368.244   | 113.462    | 128.776    | 0          | N-acetyltransferase, putative                                                 |
| PVX_081315 | 0         | 0         | 421.478   | 0         | 0         | 0         | 0         | 0         | 0         | 0          | 67.2619    | 0          | tubulin-specific chaperone a, putative                                        |
| PVX_081320 | 119.204   | 83.2937   | 296.991   | 0         | 0         | 0         | 0         | 0         | 90.3721   | 125.608    | 355.942    | 193.382    | elongation of very long chain fatty acids protein 3, putative                 |
| PVX_081325 | 148.968   | 0         | 371.457   | 0         | 0         | 0         | 0         | 207.081   | 169.44    | 52.3155    | 207.589    | 241.869    | mRNA cleavage factor-like protein, putative                                   |
| PVX_081330 | 0         | 0         | 0         | 0         | 9.26967   | 0         | 0         | 0         | 0         | 0          | 34.9188    | 0          | LCCL domain-containing protein (CCp5)                                         |
| PVX_081335 | 0         | 0         | 241.482   | 0         | 0         | 0         | 0         | 0         | 0         | 0          | 0          | 0          | hypothetical protein, conserved                                               |
| PVX_081340 | 93.052    | 0         | 0         | 0         | 29.5466   | 0         | 0         | 0         | 141.065   | 32.6878    | 111.137    | 0          | hypothetical protein, conserved                                               |
| PVX_081345 | 0         | 0         | 0         | 0         | 0         | 0         | 0         | 0         | 11.0766   | 0          | 23.2792    | 0          | secreted ookinete protein, putative (PSOP24)                                  |
| PVX_081350 | 123.651   | 86.406    | 308.109   | 0         | 0         | 0         | 0         | 0         | 93.7463   | 0          | 196.919    | 0          | hypothetical protein, conserved                                               |
| PVX_081355 | 397.08    | 277.743   | 0         | 0         | 63.2055   | 0         | 0         | 0         | 451.803   | 69.7074    | 0          | 0          | hypothetical protein                                                          |
| PVX_081360 | 0         | 0         | 0         | 0         | 0         | 0         | 0         | 0         | 0         | 0          | 111.937    | 0          | hypothetical protein, conserved                                               |
| PVX_081365 | 29.3577   | 40.9722   | 36.4643   | 93.7385   | 27.912    | 75.0314   | 89.6834   | 81.5132   | 83.4036   | 51.5851    | 73.0414    | 23.7432    | hypothetical protein, conserved                                               |
| PVX_081370 | 46.3755   | 0         | 0         | 0         | 0         | 0         | 70.9066   | 0         | 70.282    | 16.2949    | 83.078     | 0          | hypothetical protein, conserved                                               |
| PVX_081375 | 106.065   | 74.1005   | 0         | 339.536   | 101.068   | 0         | 162.479   | 589.52    | 241.212   | 335.311    | 253.364    | 0          | proteasome subunit beta type-3, putative                                      |
| PVX_081380 | 0         | 131.004   | 0         | 0         | 0         | 0         | 0         | 520.985   | 71.0395   | 0          | 111.877    | 0          | hypothetical protein, conserved                                               |
| PVX_081385 | 85.0494   | 0         | 0         | 181.11    | 0         | 0         | 43.321    | 39.3626   | 32.2191   | 29.8864    | 33.8568    | 0          | double-strand break repair protein MRE11, putative                            |
| PVX_081390 | 0         | 0         | 164.457   | 211.385   | 0         | 0         | 0         | 91.8216   | 25.0498   | 23.2257    | 26.3176    | 0          | hypothetical protein, conserved                                               |
| PVX_081395 | 0         | 0         | 0         | 0         | 0         | 0         | 0         | 0         | 3.48504   | 0          | 7.32516    | 0          | serine/threonine protein kinase, putative                                     |
| PVX_081400 | 0         | 59.0062   | 52.5193   | 0         | 20.1003   | 0         | 0         | 88.0419   | 40.0365   | 37.1409    | 37.8659    | 34.1972    | patched family protein, putative                                              |
| PVX_081405 | 0         | 0         | 0         | 403.867   | 80.1392   | 0         | 193.278   | 0         | 47.7985   | 88.5727    | 276.105    | 204.592    | hypothetical protein, conserved                                               |
| PVX_081410 | 0         | 0         | 0         | 0         | 0         | 0         | 0         | 0         | 0         | 39.0613    | 22.137     | 0          | carbon catabolite repressor protein 4, putative                               |
| PVX_081415 | 0         | 0         | 0         | 0         | 0         | 0         | 0         | 101.005   | 0         | 0          | 43.422     | 0          | hypothetical protein, conserved                                               |

| Gene ID    | Patient | Patient 1 | Patient 2 | Patient 3 | Patient 4 | Patient 5 | Patient 6 | Patient 7 | Patient 8 | Patient 9 | Patient 10 | Patient 11 | Patient 12 | Gene Description                                                                |
|------------|---------|-----------|-----------|-----------|-----------|-----------|-----------|-----------|-----------|-----------|------------|------------|------------|---------------------------------------------------------------------------------|
| PVX_081420 |         | 0         | 0         | 0         | 948.174   | 0         | 0         | 0         | 0         | 0         | 0          | 410.638    | 0          | centrin-1, putative (CEN1)                                                      |
| PVX_081425 |         | 0         | 0         | 0         | 0         | 0         | 0         | 0         | 0         | 0         | 0          | 0          | 0          | hypothetical protein, conserved                                                 |
| PVX_081430 |         | 0         | 0         | 0         | 0         | 0         | 0         | 0         | 0         | 0         | 0          | 40.3322    | 0          | ras-related protein Rab-5C, putative (RAB5c)                                    |
| PVX_081435 |         | 25.2538   | 0         | 0         | 161.318   | 0         | 0         | 38.5863   | 70.1258   | 0         | 17.7487    | 20.1062    | 0          | ribosome biogenesis protein BMS1, putative                                      |
| PVX_081440 |         | 0         | 0         | 0         | 0         | 0         | 0         | 0         | 0         | 0         | 0          | 0          | 0          | hypothetical protein, conserved                                                 |
| PVX_081445 |         | 0         | 0         | 0         | 0         | 0         | 0         | 0         | 0         | 0         | 0          | 0          | 0          | hypothetical protein, conserved                                                 |
| PVX_081450 |         | 0         | 0         | 0         | 0         | 0         | 0         | 198.906   | 0         | 98.3714   | 45.5696    | 51.6568    | 0          | pre-rRNA-processing protein TSR2, putative                                      |
| PVX_081455 |         | 0         | 36.8732   | 0         | 84.3758   | 8.37434   | 0         | 0         | 36.6779   | 20.0145   | 27.8488    | 78.8704    | 0          | calcium-transporting ATPase, putative                                           |
| PVX_081460 |         | 0         | 0         | 0         | 0         | 0         | 0         | 309.181   | 0         | 0         | 0          | 0          | 0          | hypothetical protein, conserved                                                 |
| PVX_081465 |         | 0         | 0         | 0         | 0         | 0         | 0         | 0         | 207.926   | 0         | 0          | 14.8977    | 0          | vacuolar ATP synthase subunit c, putative                                       |
| PVX_081470 |         | 0         | 33.739    | 120.169   | 308.918   | 0         | 0         | 0         | 67.116    | 0         | 0          | 19.2395    | 0          | hypothetical protein, conserved                                                 |
| PVX_081475 |         | 72.012    | 150.863   | 179.176   | 0         | 68.562    | 0         | 0         | 0         | 136.442   | 25.2995    | 100.34     | 116.668    | DNA binding protein, putative                                                   |
| PVX_081480 |         | 38.4297   | 26.8248   | 0         | 0         | 0         | 0         | 0         | 0         | 0         | 0          | 61.1938    | 0          | hypothetical protein, conserved                                                 |
| PVX_081485 |         | 12.3358   | 0         | 30.6419   | 39.3854   | 0         | 0         | 18.8406   | 34.2502   | 18.6906   | 13.0055    | 27.0083    | 0          | hypothetical protein                                                            |
| PVX_081490 |         | 49.6667   | 34.6624   | 0         | 0         | 7.8721    | 0         | 0         | 103.437   | 47.0367   | 8.7266     | 34.6       | 40.1797    | hypothetical protein, conserved                                                 |
| PVX_081495 |         | 0         | 0         | 0         | 321.208   | 0         | 0         | 0         | 0         | 76.0731   | 141.01     | 119.862    | 0          | hypothetical protein, conserved                                                 |
| PVX_081498 |         | 0         | 285.603   | 0         | 0         | 0         | 0         | 0         | 0         | 0         | 0          | 81.0943    | 0          | hypothetical protein, conserved                                                 |
| PVX_081502 |         | 0         | 0         | 0         | 0         | 0         | 0         | 482.945   | 0         | 0         | 0          | 62.3593    | 0          | hypothetical protein, conserved                                                 |
| PVX_081505 |         | 57.2297   | 79.9146   | 0         | 0         | 18.1561   | 0         | 87.5326   | 79.4838   | 86.7381   | 100.538    | 148.09     | 185.361    | hypothetical protein, conserved                                                 |
| PVX_081510 |         | 0         | 0         | 0         | 0         | 120.356   | 0         | 0         | 1573.25   | 142.935   | 0          | 74.955     | 0          | hypothetical protein, conserved                                                 |
| PVX_081515 |         | 0         | 41.3054   | 0         | 0         | 18.769    | 0         | 0         | 0         | 44.8317   | 20.7853    | 11.7756    | 0          | transporter, putative                                                           |
| PVX_081520 |         | 0         | 0         | 0         | 0         | 0         | 0         | 0         | 0         | 0         | 0          | 0          | 0          | transporter, putative                                                           |
| PVX_081525 |         | 0         | 19.2376   | 0         | 0         | 0         | 0         | 42.1191   | 0         | 10.4419   | 0          | 5.48638    | 0          | hypothetical protein, conserved                                                 |
| PVX_081530 |         | 67.7079   | 0         | 336.893   | 216.512   | 21.4858   | 0         | 103.594   | 94.0461   | 25.6566   | 47.5757    | 53.9097    | 0          | hypothetical protein, conserved                                                 |
| PVX_081535 |         | 166.073   | 0         | 206.671   | 0         | 26.36     | 0         | 127.109   | 0         | 94.4053   | 87.5133    | 181.819    | 0          | 4-hydroxy-3-methylbut-2-enyl diphosphate reductase, putative                    |
| PVX_081540 |         | 8.21285   | 5.73053   | 20.3981   | 0         | 0         | 0         | 12.5419   | 45.6039   | 18.665    | 11.5452    | 14.7119    | 13.282     | ubiquitin carboxyl-terminal hydrolase 1, putative (UBP1)                        |
| PVX_081550 |         | 0         | 0         | 0         | 0         | 0         | 0         | 0         | 0         | 26.3958   | 0          | 0          | 0          | STAR-related lipid transfer protein, putative                                   |
| PVX_081555 |         | 0         | 0         | 0         | 0         | 0         | 0         | 0         | 0         | 15.6481   | 0          | 0          | 0          | hypothetical protein, conserved                                                 |
| PVX_081560 |         | 0         | 0         | 0         | 0         | 0         | 0         | 0         | 0         | 0         | 0          | 0          | 0          | hypothetical protein, conserved                                                 |
| PVX_081565 |         | 68.5376   | 143.578   | 0         | 0         | 21.7495   | 350.897   | 104.866   | 0         | 51.9422   | 96.317     | 122.783    | 0          | hypothetical protein, conserved                                                 |
| PVX_081570 |         | 0         | 0         | 0         | 0         | 0         | 0         | 146.299   | 0         | 0         | 0          | 19.0172    | 0          | actin-related protein (ARP1)                                                    |
| PVX_081572 |         | 0         | 0         | 0         | 0         | 18.6211   | 0         | 0         | 0         | 88.9575   | 20.6218    | 58.4148    | 0          | L-seryl-tRNA(Sec) kinase, putative (PSTK)                                       |
| PVX_081575 |         | 0         | 0         | 0         | 0         | 7.21135   | 0         | 0         | 0         | 8.61805   | 7.99462    | 4.5282     | 0          | hypothetical protein, conserved                                                 |
| PVX_081580 |         | 0         | 0         | 0         | 0         | 0         | 0         | 0         | 0         | 0         | 0          | 11.0142    | 0          | hypothetical protein, conserved                                                 |
| PVX_081585 |         | 20.9451   | 131.552   | 52.0397   | 0         | 13.2778   | 0         | 95.9954   | 29.0794   | 47.6052   | 36.802     | 66.7027    | 67.7698    | hypothetical protein, conserved                                                 |
| PVX_081590 |         | 0         | 31.9275   | 0         | 0         | 14.5055   | 0         | 0         | 0         | 0         | 16.0701    | 63.7246    | 74.0423    | hypothetical protein, conserved                                                 |
| PVX_081595 |         | 237.224   | 0         | 196.788   | 0         | 50.1996   | 0         | 121.029   | 329.541   | 29.9661   | 194.459    | 188.883    | 128.136    | nucleoside transporter 4 (NT4)                                                  |
| PVX_081600 |         | 0         | 0         | 0         | 0         | 7.09229   | 0         | 0         | 0         | 0         | 15.7254    | 26.7208    | 0          | vacuolar protein sorting-associated protein 51, putative (VPS51)                |
| PVX_081605 |         | 0         | 0         | 0         | 0         | 0         | 0         | 0         | 0         | 0         | 0          | 0          | 0          | vacuolar protein sorting-associated protein VTA1, putative                      |
| PVX_081610 |         | 85.9375   | 119.98    | 106.825   | 0         | 40.881    | 0         | 131.381   | 238.676   | 146.514   | 166.079    | 102.633    | 139.115    | aspartate-tRNA ligase, putative                                                 |
| PVX_081615 |         | 0         | 0         | 0         | 0         | 20.8844   | 0         | 100.692   | 0         | 0         | 0          | 52.403     | 0          | hypothetical protein, conserved                                                 |
| PVX_081620 |         | 0         | 0         | 61.9134   | 0         | 0         | 0         | 0         | 0         | 18.8776   | 17.5115    | 19.8375    | 0          | DNA mismatch repair protein PMS1, putative (PMS1)                               |
| PVX_081625 |         | 13.4005   | 4.67501   | 0         | 21.3889   | 2.12301   | 0         | 10.2315   | 0         | 15.2272   | 16.483     | 18.6703    | 0          | hypothetical protein, conserved                                                 |
| PVX_081630 |         | 20.34     | 14.1926   | 0         | 64.9368   | 6.4454    | 0         | 15.5317   | 14.1181   | 26.9654   | 25.0184    | 30.3631    | 32.8959    | ubiquitin carboxyl-terminal hydrolase family 2, putative                        |
| PVX_081635 |         | 31.0659   | 0         | 0         | 99.2385   | 9.84931   | 0         | 0         | 0         | 0         | 21.8328    | 49.4676    | 0          | hypothetical protein, conserved                                                 |
| PVX_081640 |         | 0         | 0         | 0         | 938.825   | 93.0893   | 0         | 0         | 0         | 0         | 204.764    | 174.266    | 475.593    | hypothetical protein, conserved                                                 |
| PVX_081645 |         | 0         | 0         | 0         | 0         | 470.615   | 0         | 0         | 1020.02   | 0         | 0          | 0          | 0          | defender against cell death 2, putative                                         |
| PVX_081650 |         | 0         | 163.568   | 0         | 0         | 59.4514   | 0         | 0         | 195.23    | 106.527   | 49.3964    | 111.931    | 0          | mitochondrial import inner membrane translocase subunit TIM50, putative (TIM50) |
| PVX_081655 |         | 31.885    | 0         | 79.2449   | 0         | 0         | 0         | 0         | 44.2726   | 12.0792   | 11.2042    | 25.3859    | 0          | vacuolar protein sorting-associated protein 53, putative (VPS53)                |
| PVX_081660 |         | 35.887    | 25.0491   | 0         | 114.655   | 11.3791   | 0         | 0         | 0         | 0         | 37.8306    | 64.2878    | 0          | hypothetical protein, conserved                                                 |
| PVX_081665 |         | 0         | 0         | 0         | 0         | 0         | 0         | 0         | 0         | 0         | 0          | 0          | 0          | cysteine desulfurase, putative                                                  |
| PVX_081670 |         | 40.2986   | 0         | 0         | 0         | 12.7794   | 0         | 0         | 0         | 0         | 14.1601    | 16.0425    | 0          | DNA (cytosine-5)-methyltransferase, putative (DNMT)                             |
| PVX_081675 |         | 90.511    | 126.442   | 225.322   | 0         | 57.4759   | 0         | 0         | 0         | 137.211   | 0          | 180.17     | 146.715    | proteasome subunit alpha type-5, putative                                       |
| PVX_081680 |         | 0         | 0         | 0         | 146.16    | 0         | 0         | 0         | 0         | 0         | 16.0701    | 0          | 0          | hypothetical protein, conserved                                                 |
| PVX_081685 |         | 31.693    | 0         | 78.7674   | 0         | 0         | 0         | 0         | 0         | 12.0065   | 11.1367    | 25.2331    | 51.2883    | hypothetical protein, conserved                                                 |
| PVX_081690 |         | 0         | 0         | 75.3233   | 0         | 9.60897   | 0         | 46.3169   | 0         | 22.9637   | 21.3006    | 24.1307    | 0          | hypothetical protein, conserved                                                 |
| PVX_081695 |         | 37.0285   | 0         | 0         | 59.122    | 23.4722   | 0         | 28.2826   | 25.7038   | 42.0795   | 26.0249    | 47.9059    | 0          | cation transporting ATPase, putative                                            |
| PVX_081700 |         | 0         | 0         | 39.4974   | 0         | 0         | 0         | 0         | 0         | 18.0678   | 5.5837     | 15.8229    | 0          | hypothetical protein, conserved                                                 |
| PVX_081705 |         | 160.561   | 280.339   | 199.796   | 256.807   | 50.9667   | 0         | 0         | 0         | 91.2702   | 112.813    | 159.803    | 0          | eukaryotic translation initiation factor 2 alpha subunit, putative              |
| PVX_081707 |         | 6.07775   | 0         | 0         | 0         | 0         | 0         | 0         | 0         | 0         | 0          | 2.41939    | 0          | conserved Plasmodium protein, unknown function                                  |
| PVX_081710 |         | 0         | 0         | 0         | 0         | 0         | 0         | 0         | 0         | 0         | 0          | 0          | 0          | actin-like protein, putative (ALP3)                                             |
| PVX_081715 |         | 0         | 0         | 0         | 0         | 54.7563   | 441.751   | 0         | 0         | 0         | 0          | 137.329    | 139.771    | hypothetical protein, conserved                                                 |

| Gene ID    | Patient 1 | Patient 2 | Patient 3 | Patient 4 | Patient 5 | Patient 6 | Patient 7 | Patient 8 | Patient 9 | Patient 10 | Patient 11 | Patient 12 | Gene Description                                            |
|------------|-----------|-----------|-----------|-----------|-----------|-----------|-----------|-----------|-----------|------------|------------|------------|-------------------------------------------------------------|
| PVX_081720 | 0         | 0         | 0         | 0         | 0         | 0         | 0         | 0         | 0         | 106.544    | 181.363    | 0          | hypothetical protein, conserved                             |
| PVX_081722 | 0         | 0         | 0         | 0         | 0         | 0         | 0         | 0         | 0         | 0          | 0          | 0          | conserved Plasmodium protein, unknown function              |
| PVX_081725 | 17.2509   | 0         | 42.8566   | 0         | 16.4024   | 0         | 26.3516   | 23.9496   | 52.277    | 24.2492    | 27.4688    | 27.9055    | hypothetical protein, conserved                             |
| PVX_081730 | 0         | 0         | 0         | 0         | 0         | 0         | 0         | 0         | 0         | 19.9926    | 0          | 0          | alpha/beta hydrolase, putative                              |
| PVX_081740 | 0         | 0         | 0         | 0         | 0         | 0         | 0         | 105.913   | 28.8933   | 53.5723    | 45.5309    | 123.541    | hypothetical protein, conserved                             |
| PVX_081745 | 107.839   | 75.2892   | 0         | 0         | 17.1045   | 0         | 82.4611   | 0         | 20.4298   | 132.614    | 64.3958    | 174.623    | RNA-binding protein, putative                               |
| PVX_081750 | 0         | 328.095   | 0         | 0         | 74.6954   | 0         | 0         | 0         | 355.73    | 82.2917    | 140.019    | 0          | signal recognition particle subunit SRP9, putative (SRP9)   |
| PVX_081755 | 0         | 0         | 0         | 0         | 3.60502   | 0         | 0         | 0         | 0         | 0          | 4.52856    | 0          | hypothetical protein, conserved                             |
| PVX_081760 | 0         | 0         | 0         | 0         | 0         | 0         | 0         | 0         | 199.332   | 61.5259    | 69.7646    | 284.699    | peroxiredoxin, putative                                     |
| PVX_081765 | 36.1479   | 75.6939   | 0         | 115.489   | 0         | 0         | 55.2509   | 0         | 68.4728   | 63.5094    | 93.5353    | 0          | 60S ribosomal export protein NMD3, putative (NMD3)          |
| PVX_081770 | 112.446   | 196.27    | 139.829   | 0         | 35.6725   | 0         | 0         | 0         | 149.12    | 98.77      | 33.5735    | 0          | hypothetical protein, conserved                             |
| PVX_081775 | 39.8678   | 27.8291   | 99.107    | 0         | 0         | 203.939   | 60.9438   | 0         | 0         | 28.0174    | 23.8064    | 0          | hypothetical protein, conserved                             |
| PVX_081780 | 0         | 127.007   | 0         | 0         | 0         | 0         | 278.888   | 0         | 0         | 63.7713    | 108.471    | 0          | hypothetical protein, conserved                             |
| PVX_081785 | 43.2804   | 30.2126   | 0         | 0         | 0         | 0         | 0         | 60.102    | 32.795    | 30.4152    | 51.6888    | 0          | hypothetical protein, conserved                             |
| PVX_081790 | 0         | 0         | 0         | 0         | 0         | 0         | 0         | 0         | 0         | 0          | 0          | 0          | hypothetical protein, conserved                             |
| PVX_081792 | 0         | 0         | 0         | 0         | 0         | 0         | 0         | 8.3417    | 4.5522    | 0          | 2.39209    | 0          | hypothetical protein                                        |
| PVX_081795 | 0         | 0         | 0         | 0         | 0         | 0         | 0         | 0         | 0         | 0          | 0          | 0          | hypothetical protein, conserved                             |
| PVX_081800 | 35.7579   | 0         | 0         | 0         | 0         | 0         | 0         | 49.6521   | 13.5468   | 12.5649    | 0          | 0          | hypothetical protein, conserved                             |
| PVX_081805 | 0         | 0         | 0         | 0         | 11.3246   | 0         | 54.5887   | 49.5926   | 0         | 25.0997    | 35.5444    | 57.8037    | AP-4 complex subunit beta, putative                         |
| PVX_081810 | 119.876   | 50.1963   | 0         | 76.5721   | 37.9995   | 0         | 66.5743   | 127.151   | 109.526   | 109.757    | 38.7902    | 0          | transcription factor with AP2 domain(s), putative (AP2-L)   |
| PVX_081815 | 0         | 0         | 0         | 0         | 0         | 0         | 0         | 0         | 0         | 0          | 0          | 0          | hypothetical protein, conserved                             |
| PVX_081820 | 9.77349   | 0         | 0         | 0         | 6.19405   | 49.9501   | 0         | 13.5676   | 7.40399   | 3.43472    | 7.78115    | 0          | hypothetical protein, conserved                             |
| PVX_081822 | 0         | 0         | 0         | 0         | 0         | 0         | 0         | 0         | 0         | 0          | 0          | 0          | tRNA Valine                                                 |
| PVX_081824 | 0         | 0         | 0         | 0         | 0         | 0         | 0         | 0         | 0         | 0          | 0          | 0          | tRNA Threonine                                              |
| PVX_081825 | 0         | 0         | 0         | 0         | 0         | 0         | 0         | 0         | 0         | 0          | 0          | 0          | hypothetical protein                                        |
| PVX_081830 | 507.822   | 1447.5    | 526.038   | 270.454   | 348.935   | 1515.44   | 388.172   | 235.063   | 432.89    | 565.048    | 480.129    | 274.015    | Plasmodium exported protein, unknown function               |
| PVX_081832 | 0         | 121.919   | 0         | 0         | 0         | 178.676   | 0         | 0         | 13.2347   | 98.2043    | 104.302    | 0          | Plasmodium exported protein, unknown function               |
| PVX_081835 | 44.7745   | 0         | 0         | 0         | 0         | 0         | 0         | 0         | 0         | 0          | 0          | 0          | knob-associated histidine-rich protein, putative            |
| PVX_081840 | 84.4471   | 0         | 0         | 0         | 0         | 0         | 0         | 0         | 128.013   | 88.999     | 67.2391    | 0          | heat shock protein, putative,DnaJ domain containing protein |
| PVX_081845 | 79.0747   | 55.2248   | 0         | 0         | 0         | 0         | 0         | 0         | 27.7798   | 31.4805    | 0          | 0          | Plasmodium exported protein, unknown function               |
| PVX_081847 | 412.527   | 72.0483   | 0         | 330.118   | 32.7553   | 528.561   | 157.971   | 143.3     | 234.536   | 72.4538    | 307.944    | 334.464    | Plasmodium exported protein, unknown function               |
| PVX_081850 | 0         | 0         | 0         | 0         | 0         | 0         | 0         | 0         | 0         | 0          | 0          | 0          | variable surface protein Vir22/23-related,PIR protein       |
| PVX_082350 | 0         | 9.40522   | 0         | 0         | 4.27143   | 0         | 0         | 0         | 0         | 0          | 26.8272    | 0          | hypothetical protein, conserved                             |
| PVX_082355 | 492.734   | 57.3555   | 408.78    | 0         | 78.2073   | 0         | 125.705   | 456.335   | 248.974   | 317.35     | 474.062    | 133.086    | proteasome subunit beta type-7, putative                    |
| PVX_082360 | 0         | 0         | 0         | 0         | 0         | 0         | 0         | 0         | 8.8743    | 0          | 13.9894    | 0          | hypothetical protein, conserved                             |
| PVX_082365 | 0         | 0         | 0         | 313.798   | 0         | 0         | 0         | 0         | 74.3217   | 0          | 58.552     | 0          | hypothetical protein, conserved                             |
| PVX_082370 | 241.709   | 0         | 0         | 0         | 0         | 0         | 0         | 111.925   | 30.533    | 56.6096    | 16.0379    | 0          | hypothetical protein, conserved                             |
| PVX_082375 | 0         | 0         | 79.2732   | 0         | 0         | 0         | 0         | 44.2884   | 12.0835   | 11.2082    | 50.79      | 0          | PST-A protein                                               |
| PVX_082380 | 0         | 0         | 0         | 0         | 0         | 0         | 0         | 0         | 0         | 0          | 0          | 0          | hypothetical protein, conserved                             |
| PVX_082385 | 124.685   | 87.1295   | 0         | 399.349   | 39.6216   | 0         | 0         | 0         | 47.2653   | 0          | 49.6413    | 0          | NAD-dependent deacetylase, putative                         |
| PVX_082390 | 274.307   | 63.8678   | 0         | 0         | 87.0967   | 0         | 0         | 127.034   | 69.3068   | 64.2407    | 182.011    | 0          | hypothetical protein, conserved                             |
| PVX_082395 | 15.8739   | 33.2315   | 0         | 0         | 15.0927   | 0         | 24.2472   | 22.0377   | 18.0389   | 5.57845    | 18.9572    | 0          | DNA-directed RNA polymerase III largest subunit, putative   |
| PVX_082400 | 0         | 0         | 0         | 0         | 19.7865   | 0         | 0         | 21.6686   | 23.6492   | 21.9402    | 12.4265    | 0          | myosin C, putative                                          |
| PVX_082405 | 0         | 0         | 0         | 0         | 0         | 0         | 0         | 0         | 0         | 0          | 0          | 0          | hypothetical protein, conserved                             |
| PVX_082410 | 63.9807   | 0         | 0         | 0         | 40.6023   | 0         | 0         | 88.8657   | 48.4872   | 22.4788    | 63.6772    | 0          | chromatin assembly factor 1 P55 subunit, putative           |
| PVX_082415 | 0         | 0         | 0         | 0         | 0         | 0         | 0         | 0         | 0         | 0          | 0          | 0          | adenosine/AMP deaminase, putative                           |
| PVX_082420 | 12.2901   | 17.1517   | 0         | 0         | 3.89472   | 0         | 18.7708   | 34.1232   | 23.2766   | 4.31909    | 14.6772    | 0          | hypothetical protein, conserved                             |
| PVX_082425 | 0         | 101.31    | 180.486   | 231.987   | 23.021    | 0         | 0         | 100.759   | 27.4875   | 76.4519    | 101.072    | 0          | hypothetical protein                                        |
| PVX_082430 | 0         | 0         | 0         | 0         | 0         | 0         | 0         | 0         | 0         | 0          | 0          | 0          | apicoplast calcium binding protein 1, putative (ACBP1)      |
| PVX_082435 | 0         | 0         | 0         | 0         | 0         | 0         | 43.6253   | 0         | 10.8151   | 0          | 0          | 0          | hypothetical protein, conserved                             |
| PVX_082437 | 0         | 0         | 0         | 155.468   | 0         | 0         | 0         | 0         | 0         | 0          | 0          | 0          | conserved Plasmodium protein, unknown function              |
| PVX_082440 | 128.259   | 0         | 0         | 0         | 0         | 0         | 0         | 356.514   | 0         | 90.095     | 0          | 0          | hypothetical protein, conserved                             |
| PVX_082445 | 187.32    | 0         | 0         | 601.022   | 0         | 0         | 575.394   | 260.492   | 71.0395   | 65.7716    | 111.877    | 0          | hypothetical protein, conserved                             |
| PVX_082450 | 163.68    | 114.437   | 0         | 0         | 104.126   | 0         | 753.6     | 227.566   | 186.193   | 57.4782    | 228.095    | 0          | hypothetical protein, conserved                             |
| PVX_082455 | 318.619   | 0         | 0         | 0         | 50.6676   | 0         | 0         | 0         | 0         | 0          | 31.7148    | 0          | DnaJ domain containing protein                              |
| PVX_082460 | 0         | 0         | 0         | 0         | 0         | 0         | 0         | 0         | 52.0561   | 0          | 0          | 0          | ER lumen protein retaining receptor 1, putative             |
| PVX_082465 | 88.4866   | 0         | 0         | 282.77    | 14.0317   | 0         | 67.6419   | 61.4396   | 50.2873   | 31.0917    | 132.097    | 143.247    | hypothetical protein, conserved                             |
| PVX_082470 | 229.911   | 0         | 190.709   | 0         | 48.6491   | 0         | 117.288   | 106.458   | 145.209   | 53.8474    | 198.314    | 124.177    | elongation factor Tu, mitochondrial precursor, putative     |
| PVX_082475 | 35.5308   | 24.8004   | 88.315    | 0         | 22.5322   | 0         | 54.3066   | 0         | 26.9214   | 37.4552    | 28.2888    | 0          | hypothetical protein, conserved                             |
| PVX_082480 | 50.0311   | 69.856    | 124.407   | 159.907   | 31.739    | 256.006   | 153.009   | 0         | 113.736   | 87.895     | 109.544    | 0          | hypothetical protein, conserved                             |
| PVX_082485 | 0         | 0         | 0         | 0         | 0         | 0         | 0         | 0         | 0         | 0          | 13.0432    | 0          | hypothetical protein, conserved                             |
| PVX_082490 | 0         | 0         | 0         | 0         | 0         | 0         | 0         | 0         | 10.1057   | 0          | 15.9292    | 0          | helicase, putative                                          |



| Gene ID    | Patient 1 | Patient 2 | Patient 3 | Patient 4 | Patient 5 | Patient 6 | Patient 7 | Patient 8 | Patient 9 | Patient 10 | Patient 11 | Patient 12 | Gene Description                                                             |
|------------|-----------|-----------|-----------|-----------|-----------|-----------|-----------|-----------|-----------|------------|------------|------------|------------------------------------------------------------------------------|
| Patient    |           |           |           |           |           |           |           |           |           |            |            |            |                                                                              |
| PVX_082495 | 93.7342   | 0         | 0         | 0         | 0         | 0         | 0         | 0         | 142.1     | 98.7822    | 55.976     | 0          | hypothetical protein, conserved                                              |
| PVX_082500 | 254.418   | 0         | 0         | 0         | 0         | 0         | 0         | 0         | 96.5304   | 0          | 101.31     | 0          | signal peptidase 21 kDa subunit, putative                                    |
| PVX_082505 | 0         | 0         | 0         | 0         | 0         | 0         | 0         | 0         | 0         | 0          | 0          | 0          | CPW-WPC family protein, putative                                             |
| PVX_082510 | 0         | 0         | 0         | 0         | 0         | 0         | 78.2127   | 71.0304   | 0         | 17.9707    | 20.3611    | 0          | hypothetical protein                                                         |
| PVX_082515 | 0         | 106.439   | 0         | 0         | 0         | 0         | 0         | 0         | 57.7304   | 160.415    | 121.246    | 0          | protein tyrosine phosphatase-like protein, putative (PTPLA)                  |
| PVX_082520 | 262.581   | 26.1836   | 93.2435   | 359.551   | 47.579    | 0         | 57.3377   | 104.176   | 227.381   | 276.8      | 104.531    | 60.7142    | glutamine-tRNA ligase, putative                                              |
| PVX_082525 | 1835.7    | 257.361   | 0         | 1183.99   | 352.1     | 0         | 567.14    | 511.461   | 1115.26   | 901.56     | 438.655    | 599.792    | 60S ribosomal protein L23, putative                                          |
| PVX_082530 | 139.234   | 0         | 0         | 0         | 0         | 0         | 0         | 0         | 52.7857   | 97.7989    | 83.1522    | 0          | syntaxin 5, putative                                                         |
| PVX_082535 | 0         | 0         | 0         | 0         | 0         | 0         | 0         | 0         | 0         | 0          | 0          | 0          | hypothetical protein, conserved                                              |
| PVX_082540 | 0         | 0         | 0         | 0         | 0         | 0         | 0         | 0         | 0         | 0          | 0          | 0          | hypothetical protein, conserved                                              |
| PVX_082545 | 0         | 0         | 0         | 0         | 0         | 0         | 0         | 394.511   | 107.557   | 0          | 112.865    | 0          | trafficking protein particle complex subunit 2, putative (TRAPP2)            |
| PVX_082550 | 40.2442   | 56.1841   | 100.044   | 128.591   | 12.7621   | 0         | 123.04    | 55.8841   | 106.728   | 42.4229    | 72.0938    | 195.427    | hypothetical protein, conserved                                              |
| PVX_082555 | 184.996   | 129.376   | 0         | 0         | 58.8743   | 0         | 0         | 0         | 140.315   | 64.9566    | 110.489    | 0          | SAM-dependent RNA methyltransferase, putative                                |
| PVX_082560 | 70.1493   | 48.9857   | 0         | 448.669   | 0         | 0         | 107.337   | 194.879   | 79.7464   | 24.6453    | 55.8537    | 0          | apurinic/apryrimidinic endonuclease Apn1, putative                           |
| PVX_082565 | 0         | 49.3341   | 0         | 0         | 22.4202   | 0         | 0         | 0         | 0         | 24.8203    | 28.1253    | 0          | DEAD/DEAH box helicase domain containing protein                             |
| PVX_082570 | 0         | 231.419   | 0         | 0         | 0         | 0         | 508.004   | 0         | 188.261   | 58.1154    | 164.733    | 268.831    | eukaryotic translation initiation factor 6, putative                         |
| PVX_082575 | 52.3697   | 18.2747   | 65.0677   | 0         | 24.9024   | 0         | 0         | 0         | 69.4358   | 36.8058    | 78.178     | 84.7359    | isoleucine-tRNA ligase, putative                                             |
| PVX_082580 | 84.5268   | 118.073   | 0         | 0         | 0         | 0         | 129.396   | 0         | 128.134   | 29.6944    | 0          | 0          | 20 kDa chaperonin, putative (CPN20)                                          |
| PVX_082585 | 0         | 0         | 0         | 0         | 0         | 0         | 0         | 0         | 0         | 0          | 0          | 0          | hypothetical protein, conserved                                              |
| PVX_082590 | 0         | 0         | 0         | 0         | 0         | 0         | 0         | 0         | 14.2836   | 13.2509    | 3.75261    | 0          | ubiquitin-activating enzyme, putative                                        |
| PVX_082595 | 0         | 0         | 505.919   | 650.281   | 0         | 0         | 0         | 0         | 76.8367   | 0          | 161.329    | 0          | hypothetical protein, conserved                                              |
| PVX_082600 | 176.252   | 369.74    | 0         | 0         | 0         | 0         | 270.603   | 0         | 200.511   | 185.667    | 105.265    | 0          | hypothetical protein, conserved                                              |
| PVX_082605 | 0         | 0         | 272.918   | 0         | 0         | 0         | 0         | 152.257   | 83.0639   | 0          | 43.6234    | 0          | hypothetical protein, conserved                                              |
| PVX_082610 | 53.8346   | 37.5722   | 66.8892   | 0         | 8.53313   | 0         | 0         | 37.3731   | 40.7877   | 9.4588     | 64.2919    | 0          | hypothetical protein, conserved                                              |
| PVX_082615 | 0         | 0         | 0         | 0         | 0         | 0         | 0         | 0         | 0         | 0          | 0          | 0          | histone H3-like centromeric protein CSE4, putative (CenH3)                   |
| PVX_082620 | 0         | 88.6133   | 0         | 0         | 0         | 0         | 0         | 176.234   | 48.0697   | 0          | 0          | 0          | hypothetical protein, conserved                                              |
| PVX_082625 | 25.084    | 0         | 0         | 0         | 15.9032   | 0         | 0         | 34.827    | 0         | 17.6293    | 29.9564    | 40.5854    | hypothetical protein, conserved                                              |
| PVX_082630 | 0         | 0         | 0         | 0         | 0         | 0         | 0         | 0         | 0         | 26.9237    | 0          | 0          | hypothetical protein, conserved                                              |
| PVX_082635 | 63.3188   | 0         | 0         | 0         | 10.0376   | 0         | 0         | 43.9593   | 0         | 33.3748    | 25.2063    | 0          | hypothetical protein, conserved                                              |
| PVX_082640 | 47.4073   | 0         | 0         | 0         | 45.1088   | 0         | 72.4865   | 197.506   | 233.5     | 99.9439    | 56.6177    | 76.7523    | chaperone binding protein, putative                                          |
| PVX_082645 | 0         | 134.331   | 0         | 0         | 0         | 492.681   | 0         | 133.591   | 109.325   | 101.328    | 191.398    | 311.764    | merozoite surface protein 7 (MSP7), putative                                 |
| PVX_082650 | 0         | 0         | 0         | 0         | 0         | 0         | 0         | 0         | 0         | 0          | 0          | 0          | merozoite surface protein 7 (MSP7), putative                                 |
| PVX_082655 | 0         | 0         | 0         | 0         | 0         | 0         | 0         | 0         | 0         | 0          | 0          | 0          | merozoite surface protein 7 (MSP7), putative                                 |
| PVX_082660 | 0         | 0         | 0         | 174.169   | 0         | 0         | 0         | 0         | 0         | 0          | 108.731    | 0          | hypothetical protein                                                         |
| PVX_082665 | 0         | 0         | 0         | 0         | 0         | 0         | 0         | 0         | 0         | 0          | 0          | 0          | merozoite surface protein 7 (MSP7)                                           |
| PVX_082670 | 0         | 0         | 0         | 0         | 0         | 0         | 0         | 0         | 0         | 0          | 51.7478    | 0          | merozoite surface protein 7 (MSP7), putative                                 |
| PVX_082675 | 0         | 0         | 0         | 0         | 0         | 0         | 0         | 0         | 0         | 0          | 0          | 0          | merozoite surface protein 7 (MSP7)                                           |
| PVX_082680 | 0         | 0         | 0         | 0         | 0         | 0         | 0         | 0         | 0         | 0          | 0          | 0          | merozoite surface protein 7 (MSP7), putative                                 |
| PVX_082685 | 0         | 0         | 0         | 0         | 0         | 0         | 0         | 0         | 0         | 0          | 0          | 0          | merozoite surface protein 7 (MSP7)                                           |
| PVX_082690 | 0         | 0         | 0         | 0         | 0         | 0         | 0         | 0         | 0         | 0          | 0          | 0          | merozoite surface protein 7 (MSP7)                                           |
| PVX_082695 | 0         | 0         | 0         | 0         | 0         | 0         | 0         | 0         | 0         | 0          | 0          | 0          | merozoite surface protein 7 (MSP7), putative                                 |
| PVX_082700 | 84.4471   | 0         | 0         | 0         | 0         | 0         | 0         | 0         | 0         | 0          | 0          | 0          | merozoite surface protein 7 (MSP7)                                           |
| PVX_082710 | 186.298   | 130.132   | 0         | 0         | 0         | 0         | 0         | 0         | 70.6061   | 130.887    | 0          | 0          | hypothetical protein                                                         |
| PVX_082715 | 0         | 0         | 0         | 0         | 0         | 0         | 0         | 0         | 0         | 0          | 0          | 0          | hypothetical protein, conserved                                              |
| PVX_082720 | 0         | 117.297   | 209.004   | 0         | 0         | 0         | 0         | 116.655   | 0         | 58.9988    | 117.006    | 0          | hypothetical protein, conserved                                              |
| PVX_082725 | 42.8223   | 0         | 53.1983   | 0         | 0         | 0         | 32.7109   | 0         | 16.2215   | 15.0483    | 42.6168    | 0          | hypothetical protein, conserved                                              |
| PVX_082730 | 0         | 34.5225   | 122.962   | 158.049   | 15.6851   | 0         | 0         | 0         | 37.4719   | 0          | 19.686     | 0          | hypothetical protein, conserved                                              |
| PVX_082735 | 0         | 0         | 0         | 0         | 0         | 0         | 0         | 0         | 0         | 0          | 0          | 0          | thrombospondin-related anonymous protein,sporozoite surface protein 2 (TRAP) |
| PVX_082740 | 0         | 53.1109   | 0         | 0         | 24.1382   | 0         | 0         | 0         | 0         | 0          | 0          | 0          | hypothetical protein, conserved                                              |
| PVX_082742 | 0         | 0         | 0         | 1030.25   | 102.144   | 0         | 0         | 0         | 0         | 0          | 0          | 63.6973    | conserved Plasmodium protein, unknown function                               |
| PVX_082745 | 0         | 81.8528   | 0         | 374.786   | 18.5967   | 0         | 89.6579   | 81.4111   | 88.841    | 102.974    | 140.012    | 0          | hypothetical protein                                                         |
| PVX_082750 | 0         | 66.9495   | 0         | 0         | 30.4346   | 0         | 0         | 0         | 0         | 33.6676    | 19.0783    | 0          | hypothetical protein, conserved                                              |
| PVX_082755 | 143.332   | 50.0459   | 0         | 0         | 0         | 0         | 0         | 0         | 54.3143   | 151.068    | 156.919    | 0          | RanBPM and CLTH-like protein, putative                                       |
| PVX_082760 | 0         | 0         | 0         | 0         | 79.9621   | 0         | 0         | 0         | 190.35    | 0          | 99.8896    | 0          | hypothetical protein, conserved                                              |
| PVX_082765 | 0         | 154.982   | 184.074   | 0         | 0         | 0         | 0         | 0         | 56.0662   | 155.936    | 14.7253    | 0          | hypothetical protein                                                         |
| PVX_082770 | 0         | 148.589   | 0         | 0         | 22.5092   | 0         | 0         | 197.043   | 161.263   | 199.349    | 211.776    | 0          | nuclear movement protein, putative                                           |
| PVX_082775 | 0         | 0         | 128.286   | 0         | 16.3641   | 0         | 0         | 0         | 19.5463   | 108.756    | 71.8801    | 0          | tryptophan-tRNA ligase, putative                                             |
| PVX_082780 | 32.3811   | 0         | 0         | 0         | 0         | 0         | 0         | 0         | 12.2672   | 45.5139    | 6.44523    | 0          | mitochondrial intermediate peptidase, putative                               |
| PVX_082785 | 125.208   | 0         | 0         | 0         | 0         | 0         | 0         | 0         | 47.4639   | 175.907    | 49.8497    | 0          | CDK-related protein kinase 6, putative                                       |
| PVX_082790 | 0         | 19.9379   | 70.992    | 91.2493   | 0         | 0         | 79.3285   | 21.644    | 50.1921   | 39.8022    | 0          | 0          | 1-deoxy-D-xylulose 5-phosphate synthase, putative (DXS)                      |
| PVX_082795 | 28.0214   | 58.6708   | 0         | 0         | 17.7668   | 0         | 128.456   | 0         | 84.922    | 68.9271    | 55.7743    | 90.6836    | exonuclease, putative                                                        |
| PVX_082800 | 0         | 36.6502   | 0         | 0         | 0         | 0         | 0         | 0         | 19.8904   | 36.8899    | 52.2465    | 0          | hypothetical protein, conserved                                              |

| Gene ID    | Patient 1 | Patient 2 | Patient 3 | Patient 4 | Patient 5 | Patient 6 | Patient 7 | Patient 8 | Patient 9 | Patient 10 | Patient 11 | Patient 12 | Gene Description                                                                          |
|------------|-----------|-----------|-----------|-----------|-----------|-----------|-----------|-----------|-----------|------------|------------|------------|-------------------------------------------------------------------------------------------|
| Patient    |           |           |           |           |           |           |           |           |           |            |            |            |                                                                                           |
| PVX_082810 | 14.4094   | 0         | 0         | 0         | 4.56658   | 0         | 0         | 0         | 10.9163   | 0          | 8.60409    | 0          | hypothetical protein                                                                      |
| PVX_082813 | 0         | 0         | 0         | 0         | 0         | 0         | 0         | 0         | 0         | 0          | 0          | 0          | tRNA Serine                                                                               |
| PVX_082815 | 0         | 0         | 0         | 0         | 0         | 0         | 0         | 0         | 0         | 0          | 0          | 0          | hypothetical protein, conserved                                                           |
| PVX_082820 | 60.1128   | 0         | 0         | 0         | 0         | 0         | 0         | 0         | 0         | 0          | 0          | 0          | calcium-dependent protein kinase, putative                                                |
| PVX_082825 | 0         | 0         | 0         | 0         | 49.6038   | 0         | 0         | 0         | 0         | 54.7755    | 31.0514    | 0          | hypothetical protein, conserved                                                           |
| PVX_082830 | 0         | 44.8672   | 159.844   | 0         | 0         | 0         | 0         | 0         | 0         | 0          | 38.3709    | 0          | hypothetical protein, conserved                                                           |
| PVX_082835 | 66.8481   | 0         | 0         | 0         | 42.425    | 0         | 0         | 92.8511   | 126.653   | 117.429    | 172.981    | 324.859    | 26S proteasome regulatory subunit RPN3, putative (RPN3)                                   |
| PVX_082840 | 961.316   | 1007.59   | 1197.57   | 0         | 381.809   | 1232.34   | 1289.12   | 834.971   | 774.356   | 1181.78    | 574.096    | 0          | 60S ribosomal protein L6, putative                                                        |
| PVX_082845 | 544.444   | 266.079   | 406.196   | 348.068   | 138.17    | 557.252   | 166.53    | 226.84    | 453.833   | 439.973    | 422.647    | 0          | elongation factor 1-gamma, putative                                                       |
| PVX_082850 | 0         | 0         | 0         | 0         | 0         | 0         | 0         | 0         | 0         | 0          | 0          | 0          | hypothetical protein, conserved                                                           |
| PVX_082855 | 91.6116   | 0         | 0         | 0         | 14.5278   | 0         | 70.0343   | 0         | 52.0638   | 16.0947    | 100.292    | 74.1562    | hypothetical protein, conserved                                                           |
| PVX_082860 | 37.7489   | 0         | 281.502   | 0         | 0         | 0         | 0         | 104.835   | 28.6025   | 39.793     | 15.0274    | 61.0988    | hypothetical protein, conserved                                                           |
| PVX_082865 | 125.238   | 0         | 103.782   | 0         | 13.2389   | 0         | 0         | 0         | 0         | 44.0057    | 33.2375    | 0          | hypothetical protein, conserved                                                           |
| PVX_082870 | 0         | 0         | 0         | 0         | 0         | 0         | 0         | 0         | 0         | 0          | 0          | 0          | hypothetical protein                                                                      |
| PVX_082875 | 0         | 0         | 0         | 0         | 0         | 0         | 0         | 0         | 0         | 0          | 0          | 0          | CPW-WPC family protein, putative                                                          |
| PVX_082880 | 35.9302   | 25.0793   | 0         | 0         | 0         | 0         | 0         | 0         | 13.6121   | 0          | 42.9102    | 0          | protein kinase, putative                                                                  |
| PVX_082882 | 0         | 0         | 0         | 0         | 0         | 0         | 0         | 0         | 0         | 0          | 0          | 0          | tRNA Methionine                                                                           |
| PVX_082884 | 0         | 0         | 0         | 0         | 0         | 0         | 0         | 0         | 0         | 0          | 0          | 0          | tRNA Proline                                                                              |
| PVX_082885 | 0         | 0         | 0         | 0         | 0         | 0         | 0         | 0         | 0         | 94.5644    | 107.2      | 0          | hypothetical protein, conserved                                                           |
| PVX_082890 | 341.894   | 0         | 0         | 1101.79   | 0         | 0         | 0         | 0         | 389.396   | 119.953    | 340.397    | 0          | hypothetical protein, conserved                                                           |
| PVX_082895 | 0         | 0         | 0         | 0         | 93.3959   | 0         | 0         | 0         | 111.082   | 205.433    | 0          | 0          | 60S ribosomal protein, mitochondrial precursor, putative                                  |
| PVX_082900 | 0         | 0         | 0         | 0         | 0         | 0         | 0         | 89.0568   | 48.5914   | 0          | 63.8141    | 103.856    | hypothetical protein, conserved                                                           |
| PVX_082905 | 18.5488   | 0         | 0         | 0         | 0         | 0         | 0         | 0         | 0         | 13.0367    | 11.0758    | 0          | hypothetical protein, conserved                                                           |
| PVX_082910 | 0         | 91.069    | 0         | 0         | 41.4158   | 0         | 0         | 0         | 0         | 0          | 51.8825    | 0          | mitotic-spindle organizing protein 1, putative                                            |
| PVX_082915 | 0         | 0         | 0         | 0         | 0         | 0         | 0         | 0         | 0         | 28.0174    | 31.7419    | 0          | ABC transporter, putative                                                                 |
| PVX_082920 | 0         | 0         | 0         | 0         | 0         | 0         | 0         | 0         | 0         | 0          | 0          | 0          | hypothetical protein, conserved                                                           |
| PVX_082925 | 139.234   | 194.629   | 0         | 0         | 88.5213   | 0         | 0         | 0         | 52.7857   | 48.8994    | 166.304    | 0          | exosome complex component RRP42, putative (RRP42)                                         |
| PVX_082930 | 0         | 0         | 0         | 0         | 0         | 0         | 0         | 0         | 0         | 0          | 0          | 0          | hypothetical protein                                                                      |
| PVX_082935 | 27.2534   | 152.166   | 0         | 0         | 43.1987   | 0         | 0         | 0         | 72.2698   | 38.3075    | 54.2456    | 0          | nucleolar complex protein 2, putative                                                     |
| PVX_082937 | 0         | 0         | 0         | 0         | 0         | 0         | 0         | 138.971   | 37.9089   | 0          | 0          | 0          | hypothetical protein, conserved                                                           |
| PVX_082938 | 0         | 0         | 0         | 0         | 0         | 0         | 0         | 0         | 10.142    | 0          | 0          | 0          | hypothetical protein, conserved                                                           |
| PVX_082945 | 0         | 83.4388   | 0         | 0         | 0         | 0         | 0         | 331.953   | 45.2809   | 41.9868    | 107.042    | 96.7713    | Ser/Thr protein phosphatase family protein                                                |
| PVX_082950 | 0         | 0         | 0         | 0         | 0         | 0         | 0         | 0         | 0         | 0          | 0          | 0          | ras-related protein Rab-11b, putative (RAB11b)                                            |
| PVX_082955 | 0         | 0         | 0         | 0         | 0         | 0         | 0         | 0         | 0         | 0          | 152.346    | 0          | mitochondrial pyruvate carrier protein 1, putative (MPC1)                                 |
| PVX_082960 | 0         | 0         | 0         | 0         | 16.9208   | 272.971   | 0         | 0         | 20.2106   | 56.2251    | 53.0874    | 0          | sodium-dependent phosphate transporter, putative (PIT)                                    |
| PVX_082962 | 0         | 0         | 0         | 0         | 0         | 0         | 0         | 0         | 0         | 0          | 0          | 0          | tRNA Arginine                                                                             |
| PVX_082964 | 0         | 0         | 0         | 0         | 0         | 0         | 0         | 0         | 0         | 0          | 0          | 0          | U6 spliceosomal RNA                                                                       |
| PVX_082965 | 240.007   | 167.706   | 0         | 384.305   | 190.648   | 1230.68   | 367.825   | 166.77    | 363.914   | 505.797    | 262.775    | 389.365    | 60S ribosomal protein L18a, putative                                                      |
| PVX_082970 | 405.059   | 212.227   | 0         | 0         | 0         | 0         | 0         | 281.405   | 575.716   | 462.428    | 423.315    | 164.196    | 60S ribosomal protein L18, putative                                                       |
| PVX_082975 | 0         | 0         | 0         | 0         | 0         | 0         | 0         | 0         | 0         | 0          | 0          | 0          | hypothetical protein, conserved                                                           |
| PVX_082980 | 0         | 60.867    | 0         | 0         | 0         | 0         | 0         | 0         | 16.5174   | 15.3187    | 8.67775    | 0          | GPI mannosyltransferase 3, putative (GPI10)                                               |
| PVX_082985 | 0         | 0         | 0         | 0         | 0         | 0         | 0         | 0         | 242.857   | 0          | 0          | 0          | hypothetical protein, conserved                                                           |
| PVX_082990 | 0         | 0         | 0         | 0         | 0         | 0         | 0         | 0         | 0         | 0          | 15.8242    | 0          | hypothetical protein, conserved                                                           |
| PVX_082995 | 0         | 0         | 0         | 0         | 0         | 845.065   | 0         | 0         | 62.4071   | 0          | 0          | 0          | vacuolar ATP synthase subunit d, putative                                                 |
| PVX_083000 | 1685.06   | 1250.8    | 786.864   | 337.131   | 234.157   | 1619.38   | 322.656   | 731.691   | 997.947   | 1035.83    | 985.333    | 853.926    | 40S ribosomal protein S6, putative                                                        |
| PVX_083005 | 0         | 0         | 0         | 226.851   | 0         | 0         | 54.2635   | 98.5949   | 13.45     | 0          | 56.5326    | 0          | aconitate hydratase I, putative,IRP-like protein (iron regulatory protein-like), putative |
| PVX_083010 | 104.844   | 24.3934   | 0         | 0         | 0         | 0         | 0         | 0         | 39.7197   | 0          | 6.95619    | 0          | hypothetical protein, conserved                                                           |
| PVX_083015 | 86.4874   | 0         | 0         | 0         | 0         | 443.035   | 0         | 0         | 32.7769   | 121.531    | 68.8638    | 0          | hsp70 interacting protein, putative                                                       |
| PVX_083020 | 94.0297   | 131.364   | 0         | 0         | 0         | 0         | 0         | 0         | 71.2742   | 33.0311    | 37.435     | 152.434    | casein kinase II beta chain, putative                                                     |
| PVX_083025 | 0         | 0         | 0         | 0         | 0         | 0         | 0         | 0         | 0         | 0          | 0          | 0          | sporozoite protein essential for cell traversal, putative (SPECT1)                        |
| PVX_083030 | 168.236   | 23.4851   | 83.6288   | 107.492   | 21.3367   | 0         | 51.4246   | 233.601   | 50.9879   | 35.47      | 80.3671    | 54.4537    | myosin A, putative                                                                        |
| PVX_083032 | 0         | 0         | 0         | 0         | 0         | 0         | 0         | 0         | 1864.57   | 0          | 0          | 0          | transcription activator, putative                                                         |
| PVX_083035 | 56.047    | 0         | 0         | 0         | 0         | 286.841   | 0         | 0         | 42.4724   | 19.6922    | 89.2489    | 0          | phosphoenolpyruvate carboxykinase, putative (PEPCK)                                       |
| PVX_083040 | 15.7743   | 5.50324   | 0         | 0         | 2.49916   | 0         | 12.0444   | 0         | 11.9498   | 19.4028    | 17.2681    | 25.5102    | transcription factor with AP2 domain(s), putative (ApiAP2)                                |
| PVX_083045 | 1556.77   | 483.26    | 1291.68   | 830.13    | 686.442   | 0         | 397.216   | 1081.38   | 753.869   | 638.038    | 2496.31    | 981.238    | phosphoethanolamine N-methyltransferase, putative (PMT)                                   |
| PVX_083050 | 0         | 0         | 0         | 0         | 26.5078   | 0         | 0         | 0         | 31.6447   | 29.3343    | 33.2431    | 0          | hypothetical protein, conserved                                                           |
| PVX_083055 | 138.347   | 0         | 172.099   | 0         | 21.9516   | 0         | 0         | 0         | 26.2121   | 24.3025    | 68.8457    | 112.06     | hypothetical protein, conserved                                                           |
| PVX_083060 | 0         | 0         | 88.1399   | 113.29    | 33.7313   | 0         | 54.1989   | 0         | 40.3021   | 12.4603    | 28.2327    | 0          | hypothetical protein, conserved                                                           |
| PVX_083065 | 18.1317   | 0         | 0         | 0         | 0         | 0         | 0         | 0         | 13.7366   | 19.1154    | 14.4357    | 0          | DNA repair protein RAD5, putative (RAD5)                                                  |
| PVX_083070 | 0         | 59.6571   | 0         | 273.269   | 0         | 0         | 0         | 0         | 161.85    | 0          | 119.016    | 0          | hypothetical protein, conserved                                                           |
| PVX_083075 | 0         | 0         | 0         | 0         | 0         | 0         | 0         | 0         | 24.0885   | 0          | 63.2701    | 205.938    | UDP-N-acetylglucosamine pyrophosphorylase 1, putative                                     |
| PVX_083080 | 46.2317   | 32.274    | 0         | 147.748   | 0         | 0         | 0         | 0         | 0         | 16.2444    | 18.4046    | 0          | kelch protein K13, putative                                                               |

| Gene ID    | Patient 1 | Patient 2 | Patient 3 | Patient 4 | Patient 5 | Patient 6 | Patient 7 | Patient 8 | Patient 9 | Patient 10 | Patient 11 | Patient 12 | Gene Description                                                   |
|------------|-----------|-----------|-----------|-----------|-----------|-----------|-----------|-----------|-----------|------------|------------|------------|--------------------------------------------------------------------|
| Patient    |           |           |           |           |           |           |           |           |           |            |            |            |                                                                    |
| PVX_083085 | 0         | 0         | 0         | 0         | 0         | 0         | 0         | 0         | 0         | 0          | 1.65199    | 0          | hypothetical protein, conserved                                    |
| PVX_083090 | 0         | 0         | 0         | 0         | 0         | 0         | 79.027    | 0         | 0         | 36.3149    | 0          | 0          | U4/U6 small nuclear ribonucleoprotein PRP4, putative               |
| PVX_083095 | 29.5187   | 0         | 0         | 0         | 9.3584    | 0         | 45.1088   | 0         | 22.3652   | 51.864     | 23.5019    | 0          | aminomethyl transferase, putative                                  |
| PVX_083100 | 0         | 43.5772   | 0         | 0         | 9.89745   | 0         | 47.7077   | 0         | 0         | 0          | 12.4273    | 0          | hypothetical protein, conserved                                    |
| PVX_083105 | 34.6369   | 48.3524   | 86.0911   | 110.657   | 32.9473   | 0         | 52.9389   | 96.19     | 118.098   | 97.3683    | 62.0484    | 56.057     | heat shock protein 110, putative (HSP110)                          |
| PVX_083110 | 0         | 0         | 43.081    | 55.374    | 0         | 0         | 0         | 24.0749   | 19.7064   | 12.188     | 13.8063    | 56.1031    | hypothetical protein, conserved                                    |
| PVX_083115 | 47.2321   | 0         | 0         | 0         | 0         | 0         | 0         | 0         | 35.7903   | 33.1916    | 56.4085    | 0          | hypothetical protein, conserved                                    |
| PVX_083120 | 226.349   | 0         | 281.92    | 0         | 0         | 0         | 0         | 0         | 0         | 39.7525    | 157.703    | 0          | hypothetical protein, conserved                                    |
| PVX_083125 | 0         | 0         | 0         | 0         | 0         | 0         | 0         | 0         | 0         | 22.0997    | 25.0412    | 0          | lipoyl synthase, putative                                          |
| PVX_083130 | 27.2368   | 19.0091   | 0         | 0         | 0         | 0         | 41.6188   | 0         | 20.6359   | 38.2842    | 75.8976    | 0          | hypothetical protein, conserved                                    |
| PVX_083135 | 0         | 46.0928   | 0         | 0         | 0         | 337.931   | 0         | 0         | 75.0386   | 23.1915    | 0          | 0          | aspartate carbamoyltransferase, putative                           |
| PVX_083140 | 17.0895   | 59.6278   | 0         | 0         | 10.8326   | 0         | 0         | 0         | 19.4204   | 24.0223    | 17.0074    | 0          | hypothetical protein, conserved                                    |
| PVX_083150 | 0         | 0         | 0         | 0         | 0         | 0         | 0         | 196.264   | 0         | 0          | 14.0626    | 0          | hypothetical protein, conserved                                    |
| PVX_083155 | 0         | 0         | 341.752   | 0         | 0         | 703.371   | 0         | 0         | 103.953   | 48.1508    | 0          | 222.527    | thioredoxin 2, putative (TRX2)                                     |
| PVX_083160 | 0         | 42.4859   | 0         | 0         | 0         | 0         | 0         | 0         | 0         | 0          | 12.1119    | 0          | rhomboid protease ROM6, putative                                   |
| PVX_083165 | 220.559   | 154.317   | 0         | 0         | 70.2533   | 0         | 0         | 306.816   | 167.329   | 0          | 43.9116    | 358.831    | hypothetical protein                                               |
| PVX_083170 | 0         | 0         | 0         | 0         | 11.1763   | 0         | 0         | 0         | 0         | 6.19606    | 7.01874    | 0          | hypothetical protein, conserved                                    |
| PVX_083175 | 152.782   | 0         | 0         | 489.73    | 0         | 0         | 0         | 0         | 0         | 53.6542    | 152.076    | 248.089    | ubiquitin-conjugating enzyme E2, putative                          |
| PVX_083180 | 0         | 0         | 0         | 0         | 0         | 0         | 0         | 0         | 0         | 0          | 0          | 0          | hypothetical protein, conserved                                    |
| PVX_083185 | 0         | 0         | 184.532   | 0         | 47.074    | 0         | 113.489   | 412.06    | 112.411   | 26.0539    | 280.476    | 120.156    | isocitrate dehydrogenase [NADP], mitochondrial precursor, putative |
| PVX_083190 | 176.124   | 40.9748   | 0         | 93.7655   | 37.2247   | 0         | 0         | 40.7574   | 155.683   | 82.5197    | 122.697    | 95.0001    | hypothetical protein, conserved                                    |
| PVX_083195 | 0         | 0         | 0         | 0         | 0         | 0         | 0         | 0         | 75.8057   | 0          | 119.375    | 0          | hypothetical protein, conserved                                    |
| PVX_083200 | 0         | 0         | 0         | 0         | 0         | 0         | 0         | 0         | 0         | 0          | 0          | 0          | dynactin subunit 2, putative                                       |
| PVX_083205 | 294.445   | 308.433   | 183.164   | 706.286   | 46.7249   | 0         | 0         | 102.252   | 306.841   | 129.306    | 161.179    | 0          | protein transport protein SEC61 subunit alpha, putative            |
| PVX_083210 | 0         | 0         | 0         | 0         | 0         | 0         | 0         | 0         | 111.815   | 206.783    | 58.6626    | 0          | nuclear import protein MOG1, putative                              |
| PVX_083215 | 212.696   | 892.801   | 0         | 0         | 135.471   | 0         | 0         | 0         | 161.355   | 149.344    | 42.3457    | 0          | DNA/RNA-binding protein Alba 2, putative (ALBA2)                   |
| PVX_083220 | 27.1872   | 7.58768   | 0         | 0         | 3.44566   | 0         | 0         | 0         | 18.5358   | 11.4656    | 17.3159    | 17.5856    | hypothetical protein, conserved                                    |
| PVX_083225 | 85.4452   | 0         | 0         | 136.52    | 40.6466   | 0         | 0         | 0         | 32.3722   | 60.0465    | 85.0375    | 0          | hypothetical protein, conserved                                    |
| PVX_083230 | 193.392   | 0         | 0         | 0         | 61.5587   | 0         | 0         | 0         | 146.69    | 67.9015    | 77.0029    | 0          | hypothetical protein, conserved                                    |
| PVX_083235 | 0         | 0         | 0         | 0         | 0         | 0         | 0         | 0         | 19.1704   | 0          | 0          | 0          | 6-cysteine protein                                                 |
| PVX_083240 | 0         | 39.1555   | 0         | 0         | 17.7915   | 0         | 0         | 77.889    | 0         | 0          | 11.1631    | 0          | 6-cysteine protein                                                 |
| PVX_083245 | 227.28    | 0         | 0         | 0         | 0         | 0         | 0         | 0         | 86.218    | 79.7867    | 45.2502    | 0          | hypothetical protein, conserved                                    |
| PVX_083250 | 0         | 0         | 0         | 0         | 31.9794   | 0         | 0         | 0         | 0         | 0          | 0          | 0          | G-beta repeat protein, putative                                    |
| PVX_083255 | 41.8046   | 0         | 103.927   | 0         | 0         | 0         | 0         | 0         | 15.8382   | 0          | 8.32101    | 0          | DNA topoisomerase 3, putative (TOP3)                               |
| PVX_083260 | 0         | 41.4425   | 0         | 0         | 56.4941   | 0         | 0         | 164.875   | 157.432   | 41.7084    | 35.4441    | 0          | nucleoside transporter 1, putative (NT1)                           |
| PVX_083262 | 0         | 0         | 0         | 0         | 0         | 0         | 0         | 0         | 0         | 0          | 0          | 0          | conserved Plasmodium membrane protein, unknown function            |
| PVX_083265 | 319.896   | 0         | 0         | 0         | 0         | 0         | 0         | 0         | 0         | 112.247    | 0          | 0          | hypothetical protein, conserved                                    |
| PVX_083270 | 909.714   | 882.082   | 502.696   | 484.604   | 272.527   | 258.612   | 463.702   | 1193.19   | 497.867   | 1047.7     | 523.11     | 245.492    | DNA/RNA-binding protein Alba 4, putative (ALBA4)                   |
| PVX_083275 | 0         | 0         | 0         | 0         | 0         | 0         | 0         | 0         | 0         | 0          | 25.9413    | 0          | hypothetical protein                                               |
| PVX_083280 | 141.323   | 98.658    | 234.258   | 0         | 0         | 0         | 216.084   | 65.4194   | 35.6961   | 49.6564    | 75.0134    | 0          | ethanolamine-phosphate cytidylyltransferase, putative              |
| PVX_083285 | 0         | 85.6945   | 0         | 0         | 0         | 0         | 0         | 0         | 46.4874   | 43.0734    | 0          | 0          | leucine-rich repeat protein                                        |
| PVX_083290 | 53.2302   | 12.382    | 0         | 0         | 11.2473   | 0         | 0         | 0         | 20.1636   | 37.4122    | 45.9113    | 0          | hypothetical protein, conserved                                    |
| PVX_083295 | 0         | 0         | 0         | 0         | 0         | 0         | 0         | 0         | 0         | 0          | 0          | 0          | hypothetical protein, conserved                                    |
| PVX_083300 | 0         | 0         | 0         | 0         | 0         | 0         | 0         | 0         | 0         | 0          | 0          | 0          | GTPase, putative                                                   |
| PVX_083305 | 0         | 0         | 0         | 0         | 0         | 0         | 0         | 0         | 77.6752   | 0          | 54.4036    | 0          | step II splicing factor, putative                                  |
| PVX_083310 | 45.1217   | 0         | 0         | 0         | 0         | 0         | 0         | 31.3231   | 17.0927   | 15.8562    | 17.9621    | 36.5005    | translation elongation factor, putative                            |
| PVX_083315 | 0         | 5.98485   | 0         | 0         | 5.43579   | 0         | 0         | 0         | 3.24888   | 3.01436    | 5.1216     | 27.743     | hypothetical protein, conserved                                    |
| PVX_083320 | 318.196   | 0         | 0         | 0         | 0         | 0         | 0         | 0         | 80.4039   | 74.5136    | 126.682    | 0          | TBC domain protein, putative                                       |
| PVX_083325 | 0         | 0         | 0         | 0         | 0         | 0         | 0         | 0         | 0         | 33.5598    | 19.0172    | 0          | hypothetical protein, conserved                                    |
| PVX_083330 | 0         | 0         | 0         | 0         | 12.3507   | 0         | 0         | 0         | 0         | 13.6857    | 23.2573    | 0          | hypothetical protein, conserved                                    |
| PVX_083335 | 0         | 0         | 0         | 0         | 0         | 0         | 0         | 0         | 7.05264   | 0          | 3.70577    | 0          | plasma membrane Ca2+ ATPase, putative                              |
| PVX_083340 | 0         | 94.6588   | 0         | 0         | 43.0509   | 0         | 207.673   | 0         | 51.3464   | 95.1365    | 53.9244    | 0          | hypothetical protein, conserved                                    |
| PVX_083345 | 0         | 0         | 0         | 0         | 0         | 0         | 0         | 88.0469   | 0         | 0          | 0          | 0          | hypothetical protein, conserved                                    |
| PVX_083350 | 875.76    | 306.362   | 0         | 703.104   | 69.7349   | 0         | 673.204   | 913.677   | 747.444   | 538.034    | 523.071    | 356.181    | nucleoside diphosphate hydrolase, putative                         |
| PVX_083355 | 0         | 57.8231   | 102.964   | 132.345   | 13.1346   | 0         | 63.3162   | 57.5141   | 62.7662   | 29.1064    | 107.172    | 0          | glutamate-tRNA ligase, putative                                    |
| PVX_083360 | 0         | 12.471    | 88.7957   | 0         | 0         | 0         | 0         | 24.8106   | 0         | 6.28019    | 39.1273    | 28.909     | tyrosine kinase-like protein, putative (TKL3)                      |
| PVX_083365 | 0         | 0         | 0         | 0         | 0         | 0         | 0         | 0         | 101.768   | 94.281     | 80.1586    | 0          | cytidine and deoxycytidylate deaminase, putative                   |
| PVX_083370 | 22.3601   | 7.80118   | 0         | 35.6941   | 0         | 0         | 0         | 15.5204   | 16.9392   | 23.574     | 33.3787    | 18.082     | hypothetical protein, conserved                                    |
| PVX_083375 | 0         | 0         | 194.89    | 0         | 0         | 0         | 0         | 0         | 29.6775   | 27.5125    | 31.1774    | 0          | hypothetical protein, conserved                                    |
| PVX_083380 | 0         | 0         | 0         | 0         | 0         | 0         | 0         | 165.879   | 0         | 0          | 23.7611    | 0          | hypothetical protein, conserved                                    |
| PVX_083385 | 0         | 59.4866   | 0         | 0         | 27.0387   | 0         | 130.384   | 0         | 32.2775   | 0          | 50.8613    | 138.037    | hypothetical protein, conserved                                    |
| PVX_083390 | 0         | 0         | 0         | 0         | 0         | 0         | 0         | 0         | 0         | 0          | 0          | 0          | hypothetical protein, conserved                                    |

| Gene ID    | Patient 1 | Patient 2 | Patient 3 | Patient 4 | Patient 5 | Patient 6 | Patient 7 | Patient 8 | Patient 9 | Patient 10 | Patient 11 | Patient 12 | Gene Description                                              |
|------------|-----------|-----------|-----------|-----------|-----------|-----------|-----------|-----------|-----------|------------|------------|------------|---------------------------------------------------------------|
| Patient    |           |           |           |           |           |           |           |           |           |            |            |            |                                                               |
| PVX_083395 | 0         | 0         | 0         | 0         | 0         | 0         | 0         | 0         | 0         | 0          | 0          | 0          | hypothetical protein, conserved                               |
| PVX_083400 | 159.358   | 74.1712   | 0         | 169.793   | 16.8504   | 0         | 81.2354   | 73.7722   | 100.633   | 55.9916    | 148.027    | 0          | lysine-tRNA ligase, putative                                  |
| PVX_083405 | 0         | 723.305   | 0         | 0         | 332.293   | 0         | 0         | 0         | 780.659   | 0          | 1019.96    | 0          | small nuclear ribonucleoprotein E, putative                   |
| PVX_083410 | 327.512   | 305.092   | 0         | 0         | 69.3568   | 0         | 167.253   | 303.399   | 124.139   | 38.347     | 173.855    | 0          | hypothetical protein, conserved                               |
| PVX_083415 | 0         | 0         | 0         | 0         | 0         | 0         | 0         | 79.9441   | 21.8101   | 0          | 22.915     | 0          | ubiquitin-activating enzyme E1, putative                      |
| PVX_083420 | 0         | 0         | 0         | 0         | 0         | 0         | 0         | 0         | 27.8281   | 0          | 9.74777    | 39.6186    | hypothetical protein, conserved                               |
| PVX_083425 | 0         | 110.196   | 0         | 0         | 0         | 0         | 0         | 219.136   | 59.7662   | 110.708    | 125.518    | 0          | hypothetical protein, conserved                               |
| PVX_083430 | 86.9073   | 0         | 0         | 0         | 0         | 0         | 0         | 0         | 32.9361   | 0          | 34.5991    | 0          | hypothetical protein, conserved                               |
| PVX_083435 | 0         | 0         | 229.51    | 0         | 0         | 0         | 0         | 0         | 34.9392   | 0          | 91.7554    | 0          | hypothetical protein, conserved                               |
| PVX_083440 | 0         | 0         | 0         | 0         | 0         | 0         | 0         | 0         | 0         | 0          | 0          | 0          | transcription factor with AP2 domain(s), putative (ApiAP2)    |
| PVX_083445 | 103.43    | 24.0644   | 0         | 110.145   | 21.8633   | 176.334   | 0         | 0         | 26.1226   | 12.1148    | 0          | 0          | phosphatidylinositol transfer protein, putative               |
| PVX_083450 | 0         | 287.463   | 0         | 0         | 43.5803   | 0         | 420.459   | 0         | 363.834   | 288.905    | 245.634    | 0          | hypothetical protein, conserved                               |
| PVX_083455 | 22.2413   | 0         | 0         | 0         | 0         | 0         | 0         | 30.8793   | 8.42525   | 0          | 8.85382    | 0          | hypothetical protein, conserved                               |
| PVX_083460 | 0         | 0         | 0         | 0         | 23.537    | 0         | 0         | 0         | 28.1028   | 78.1617    | 0          | 0          | hypothetical protein, conserved                               |
| PVX_083465 | 490.774   | 822.804   | 1710.82   | 314.143   | 280.537   | 0         | 751.617   | 545.51    | 892.839   | 861.988    | 586.162    | 318.279    | 60S ribosomal protein L17, putative                           |
| PVX_083470 | 0         | 0         | 0         | 0         | 14.4243   | 0         | 0         | 0         | 17.2311   | 0          | 27.1579    | 0          | glycerol kinase, putative                                     |
| PVX_083475 | 0         | 0         | 0         | 0         | 0         | 0         | 0         | 0         | 0         | 0          | 0          | 0          | inner membrane complex protein 1f, putative (IMC1f)           |
| PVX_083480 | 70.9839   | 247.845   | 353.226   | 0         | 45.0543   | 363.449   | 0         | 197.199   | 295.884   | 199.507    | 240.203    | 229.998    | hypothetical protein, conserved                               |
| PVX_083485 | 0         | 0         | 0         | 0         | 0         | 0         | 0         | 0         | 26.2527   | 48.6802    | 0          | 0          | hypothetical protein, conserved                               |
| PVX_083490 | 17.1912   | 0         | 0         | 54.8951   | 5.44855   | 0         | 0         | 0         | 6.51202   | 0          | 17.1087    | 27.809     | hypothetical protein, conserved                               |
| PVX_083495 | 0         | 0         | 0         | 0         | 0         | 0         | 0         | 44.4787   | 24.2709   | 11.2563    | 19.1281    | 0          | ABC transporter, putative                                     |
| PVX_083500 | 51.0878   | 35.6662   | 0         | 0         | 16.2051   | 0         | 0         | 0         | 58.0695   | 35.9004    | 10.1689    | 0          | hypothetical protein, conserved                               |
| PVX_083505 | 0         | 0         | 0         | 0         | 16.031    | 0         | 0         | 0         | 57.4462   | 0          | 20.1196    | 0          | hypothetical protein, conserved                               |
| PVX_083510 | 0         | 28.6897   | 51.071    | 65.6439   | 0         | 0         | 0         | 28.5383   | 15.5731   | 28.8939    | 45.0049    | 0          | hypothetical protein, conserved                               |
| PVX_083515 | 147.01    | 102.76    | 0         | 0         | 46.7416   | 0         | 0         | 0         | 55.7369   | 258.143    | 58.5315    | 0          | protein disulfide-isomerase, putative                         |
| PVX_083520 | 0         | 0         | 0         | 0         | 26.5824   | 0         | 0         | 0         | 0         | 0          | 16.6682    | 0          | calcium-dependent protein kinase, putative                    |
| PVX_083530 | 12.4943   | 8.71837   | 31.0356   | 0         | 3.95945   | 0         | 0         | 52.0353   | 33.1286   | 21.9542    | 22.3815    | 20.2084    | hypothetical protein, conserved                               |
| PVX_083535 | 0         | 0         | 0         | 0         | 0         | 0         | 115.402   | 0         | 14.3012   | 0          | 22.5411    | 61.0988    | vacuolar fusion protein MON1, putative                        |
| PVX_083545 | 0         | 121.034   | 0         | 0         | 0         | 295.746   | 0         | 0         | 21.8946   | 0          | 0          | 0          | Plasmodium exported protein, unknown function,fam-f protein   |
| PVX_083550 | 0         | 82.6766   | 0         | 0         | 0         | 201.957   | 0         | 0         | 14.9576   | 27.7456    | 7.85846    | 0          | tryptophan-rich antigen (Pv-fam-a)                            |
| PVX_083555 | 845.93    | 788.345   | 351.481   | 903.551   | 224.102   | 0         | 648.654   | 783.893   | 748.323   | 693.214    | 842.003    | 457.724    | hypothetical protein                                          |
| PVX_083560 | 841.132   | 832.105   | 348.79    | 1120.79   | 355.91    | 1076.65   | 107.253   | 389.452   | 823.4     | 1132.79    | 823.196    | 567.775    | Plasmodium exported protein, unknown function                 |
| PVX_083565 | 0         | 0         | 0         | 0         | 0         | 0         | 0         | 0         | 0         | 0          | 0          | 0          | Plasmodium exported protein, unknown function                 |
| PVX_083570 | 94.7264   | 397.014   | 0         | 0         | 0         | 0         | 0         | 0         | 0         | 0          | 18.8562    | 0          | Plasmodium exported protein, unknown function                 |
| PVX_083575 | 0         | 0         | 0         | 0         | 0         | 0         | 0         | 0         | 0         | 0          | 0          | 0          | variable surface protein Vir24-related,PIR protein            |
| PVX_083580 | 0         | 0         | 0         | 0         | 0         | 0         | 0         | 0         | 0         | 0          | 0          | 0          | variable surface protein Vir24-related,PIR protein            |
| PVX_083585 | 0         | 0         | 0         | 0         | 0         | 0         | 0         | 0         | 0         | 0          | 24.6769    | 0          | variable surface protein Vir18-related,PIR protein            |
| PVX_083590 | 0         | 51.7464   | 0         | 0         | 0         | 0         | 0         | 0         | 0         | 0          | 0          | 120.056    | variable surface protein Vir12, putative,PIR protein          |
| PVX_084090 | 0         | 415.454   | 0         | 0         | 0         | 0         | 0         | 0         | 0         | 0          | 0          | 0          | liver stage associated protein 1, putative (LSAP1)            |
| PVX_084095 | 0         | 0         | 0         | 0         | 0         | 0         | 0         | 0         | 0         | 0          | 0          | 0          | hypothetical protein                                          |
| PVX_084100 | 56.4714   | 78.8549   | 0         | 0         | 0         | 0         | 86.3706   | 78.4299   | 0         | 19.8412    | 22.4812    | 0          | XPA binding protein 1, putative                               |
| PVX_084105 | 0         | 0         | 0         | 0         | 0         | 0         | 0         | 0         | 0         | 0          | 39.4234    | 0          | serine/threonine-protein kinase Nek1, putative                |
| PVX_084110 | 0         | 0         | 0         | 0         | 0         | 0         | 0         | 0         | 0         | 0          | 0          | 0          | hypothetical protein, conserved                               |
| PVX_084115 | 0         | 0         | 0         | 0         | 0         | 0         | 0         | 0         | 0         | 45.1769    | 0          | 0          | cytochrome c oxidase assembly protein COX19, putative (COX19) |
| PVX_084120 | 161.904   | 113.192   | 0         | 0         | 0         | 0         | 0         | 0         | 61.3899   | 170.564    | 64.4626    | 0          | hypothetical protein, conserved                               |
| PVX_084125 | 38.3803   | 26.7903   | 190.811   | 122.629   | 12.1705   | 0         | 0         | 0         | 58.162    | 0          | 22.9182    | 124.244    | ATP dependent RNA helicase, putative                          |
| PVX_084130 | 0         | 0         | 0         | 304.758   | 0         | 0         | 145.831   | 0         | 0         | 33.4527    | 75.8261    | 0          | conserved protein, unknown function                           |
| PVX_084135 | 116.413   | 0         | 0         | 0         | 36.9856   | 0         | 178.39    | 161.775   | 44.1272   | 40.8895    | 69.5214    | 0          | mitochondrial carrier protein, putative                       |
| PVX_084160 | 10.707    | 0         | 0         | 0         | 0         | 0         | 0         | 0         | 2.02774   | 3.76289    | 3.19663    | 0          | dynein heavy chain, putative                                  |
| PVX_084165 | 68.907    | 0         | 171.435   | 0         | 21.8669   | 0         | 0         | 0         | 0         | 24.209     | 41.1483    | 0          | cyclophilin, putative                                         |
| PVX_084170 | 0         | 0         | 0         | 0         | 0         | 0         | 0         | 0         | 0         | 21.5634    | 0          | 0          | hypothetical protein, conserved                               |
| PVX_084175 | 45.8411   | 31.9886   | 0         | 0         | 4.8427    | 0         | 46.6801   | 127.281   | 23.1524   | 16.1096    | 42.5794    | 0          | hypothetical protein, conserved                               |
| PVX_084180 | 208.487   | 0         | 172.903   | 0         | 0         | 355.812   | 106.335   | 193.062   | 26.3343   | 24.4157    | 41.4999    | 112.583    | hypothetical protein, conserved                               |
| PVX_084185 | 0         | 1637.15   | 0         | 0         | 0         | 0         | 1829.84   | 0         | 0         | 0          | 230.552    | 0          | hypothetical protein, conserved                               |
| PVX_084190 | 428.633   | 1202.82   | 0         | 1384.71   | 137.232   | 0         | 0         | 597.486   | 488.477   | 300.639    | 682.888    | 0          | high mobility group protein B1, putative (HMGB1)              |
| PVX_084195 | 0         | 0         | 0         | 0         | 0         | 0         | 0         | 0         | 0         | 0          | 5.42126    | 0          | origin recognition complex subunit 1, putative (ORC1)         |
| PVX_084200 | 0         | 72.5506   | 0         | 0         | 32.9839   | 0         | 0         | 0         | 118.085   | 36.479     | 82.6902    | 0          | hypothetical protein, conserved                               |
| PVX_084205 | 0         | 0         | 0         | 0         | 73.1536   | 0         | 706.263   | 0         | 87.1042   | 322.418    | 182.859    | 373.657    | signal recognition particle subunit SRP14, putative (SRP14)   |
| PVX_084210 | 80.8156   | 0         | 100.451   | 0         | 0         | 0         | 0         | 112.223   | 30.6177   | 0          | 56.3008    | 0          | hypothetical protein, conserved                               |
| PVX_084215 | 33.8509   | 23.6273   | 0         | 108.143   | 21.466    | 0         | 0         | 94.0062   | 76.9448   | 35.6846    | 60.6401    | 0          | hypothetical protein, conserved                               |
| PVX_084220 | 60.4785   | 84.4546   | 0         | 193.355   | 19.1882   | 0         | 0         | 83.9984   | 45.8319   | 42.4974    | 48.1531    | 0          | threonylcarbamoyl-AMP synthase, putative (SUAS)               |
| PVX_084225 | 165.803   | 115.924   | 0         | 0         | 52.7412   | 0         | 0         | 0         | 0         | 116.446    | 33.0078    | 0          | cytochrome c1 heme lyase, putative                            |

| Gene ID    | Patient | Patient 1 | Patient 2 | Patient 3 | Patient 4 | Patient 5 | Patient 6 | Patient 7 | Patient 8 | Patient 9 | Patient 10 | Patient 11 | Patient 12 | Gene Description                                                                |
|------------|---------|-----------|-----------|-----------|-----------|-----------|-----------|-----------|-----------|-----------|------------|------------|------------|---------------------------------------------------------------------------------|
| PVX_084230 |         | 108.928   | 25.344    | 90.2519   | 0         | 23.0263   | 185.716   | 0         | 100.836   | 123.801   | 102.068    | 101.18     | 58.7662    | nucleosome assembly protein, putative (NAPL)                                    |
| PVX_084235 |         | 255.143   | 0         | 0         | 0         | 0         | 0         | 0         | 0         | 193.612   | 89.5553    | 152.398    | 0          | ubiquitin-conjugating enzyme E2 4, putative                                     |
| PVX_084240 |         | 0         | 0         | 0         | 0         | 0         | 0         | 0         | 0         | 0         | 0          | 0          | 0          | hypothetical protein, conserved                                                 |
| PVX_084245 |         | 0         | 0         | 0         | 0         | 0         | 0         | 0         | 0         | 0         | 0          | 30.3622    | 0          | hypothetical protein, conserved                                                 |
| PVX_084250 |         | 0         | 42.7477   | 0         | 0         | 38.8497   | 0         | 0         | 85.0334   | 0         | 43.0205    | 48.7461    | 0          | hypothetical protein, conserved                                                 |
| PVX_084255 |         | 354.866   | 123.932   | 220.843   | 283.86    | 56.3339   | 0         | 0         | 246.505   | 268.978   | 311.655    | 194.257    | 143.799    | eukaryotic translation initiation factor 5A                                     |
| PVX_084260 |         | 0         | 0         | 0         | 0         | 0         | 0         | 0         | 0         | 0         | 29.7505    | 0          | 0          | hypothetical protein, conserved                                                 |
| PVX_084265 |         | 184.95    | 0         | 0         | 0         | 0         | 0         | 0         | 0         | 35.0476   | 32.4853    | 18.408     | 0          | hypothetical protein, conserved                                                 |
| PVX_084270 |         | 0         | 0         | 0         | 0         | 0         | 0         | 0         | 0         | 35.4137   | 32.8243    | 18.6002    | 0          | cytidine deaminase, putative                                                    |
| PVX_084275 |         | 0         | 0         | 418.305   | 0         | 0         | 0         | 0         | 0         | 0         | 117.754    | 33.3789    | 272.373    | hypothetical protein, conserved                                                 |
| PVX_084277 |         | 0         | 0         | 0         | 0         | 0         | 0         | 0         | 0         | 0         | 0          | 0          | 0          | conserved Plasmodium protein, unknown function                                  |
| PVX_084280 |         | 31.2395   | 43.6076   | 0         | 99.7932   | 29.7131   | 0         | 47.7411   | 173.504   | 11.8346   | 32.9321    | 18.654     | 0          | hypothetical protein, conserved                                                 |
| PVX_084285 |         | 87.7061   | 0         | 0         | 0         | 13.9078   | 0         | 0         | 0         | 0         | 46.2263    | 34.9151    | 0          | O-phosphoserine-tRNA(Sec) selenium transferase, putative (SEPSecs)              |
| PVX_084290 |         | 0         | 0         | 0         | 0         | 0         | 0         | 0         | 0         | 0         | 0          | 0          | 0          | HAD domain ookinete protein, putative (HADO)                                    |
| PVX_084295 |         | 0         | 0         | 0         | 0         | 17.7137   | 0         | 0         | 0         | 21.1567   | 0          | 11.1143    | 0          | hypothetical protein, conserved                                                 |
| PVX_084300 |         | 35.3763   | 0         | 0         | 0         | 0         | 0         | 0         | 0         | 0         | 24.8616    | 7.04144    | 0          | hypothetical protein, conserved                                                 |
| PVX_084305 |         | 53.0409   | 0         | 0         | 0         | 5.60362   | 0         | 0         | 24.5458   | 46.8811   | 12.4264    | 70.3815    | 0          | zinc finger protein, putative                                                   |
| PVX_084310 |         | 186.298   | 65.0658   | 231.905   | 894.237   | 88.7322   | 0         | 142.634   | 388.247   | 141.212   | 229.053    | 352.3      | 0          | hypothetical protein, conserved                                                 |
| PVX_084315 |         | 0         | 0         | 0         | 0         | 0         | 0         | 0         | 0         | 0         | 0          | 45.287     | 0          | glyoxalase II, putative                                                         |
| PVX_084320 |         | 0         | 0         | 0         | 0         | 0         | 0         | 0         | 0         | 0         | 0          | 0          | 0          | hypothetical protein                                                            |
| PVX_084325 |         | 10.5178   | 7.33903   | 52.2492   | 0         | 13.3318   | 0         | 16.063    | 29.202    | 7.9679    | 22.1777    | 16.7475    | 34.0213    | high mobility group protein B3, putative (HMGB3)                                |
| PVX_084330 |         | 79.4613   | 55.4572   | 65.8193   | 0         | 8.39667   | 135.437   | 0         | 0         | 40.1357   | 27.9229    | 52.7203    | 85.7147    | hypothetical protein, conserved                                                 |
| PVX_084335 |         | 0         | 0         | 0         | 407.904   | 40.4699   | 0         | 0         | 0         | 96.5501   | 134.182    | 177.454    | 206.637    | shewanella-like protein phosphatase 2, putative (SHLP2)                         |
| PVX_084340 |         | 0         | 0         | 0         | 0         | 0         | 0         | 0         | 0         | 0         | 0          | 38.7325    | 0          | IMP-specific 5'-nucleotidase, putative                                          |
| PVX_084345 |         | 55.2641   | 134.996   | 68.6667   | 0         | 70.079    | 141.297   | 42.2232   | 268.56    | 146.548   | 126.229    | 159.498    | 44.7113    | eukaryotic translation initiation factor 3 subunit 8, putative                  |
| PVX_084350 |         | 11.7665   | 0         | 0         | 0         | 0         | 0         | 0         | 0         | 0         | 0          | 4.68397    | 0          | hypothetical protein, conserved                                                 |
| PVX_084355 |         | 110.382   | 0         | 0         | 0         | 70.1288   | 0         | 0         | 0         | 83.6791   | 0          | 43.9463    | 0          | rhodanese like protein, putative                                                |
| PVX_084360 |         | 0         | 0         | 0         | 0         | 0         | 0         | 0         | 0         | 0         | 0          | 0          | 0          | Tat binding protein 1(TBP-1)-interacting protein, putative                      |
| PVX_084365 |         | 18.9816   | 0         | 0         | 0         | 0         | 0         | 0         | 0         | 64.7125   | 26.6817    | 26.4466    | 0          | DNA-directed RNA polymerase III subunit, putative                               |
| PVX_084370 |         | 134.906   | 94.2022   | 0         | 0         | 64.214    | 345.332   | 103.202   | 93.6914   | 178.919   | 71.0947    | 214.826    | 0          | eukaryotic translation initiation factor 5, putative                            |
| PVX_084375 |         | 0         | 0         | 0         | 0         | 0         | 0         | 0         | 0         | 0         | 0          | 47.0319    | 0          | hypothetical protein, conserved                                                 |
| PVX_084380 |         | 0         | 22.0347   | 0         | 0         | 10.0093   | 0         | 0         | 0         | 0         | 0          | 6.28379    | 0          | hypothetical protein, conserved                                                 |
| PVX_084385 |         | 0         | 0         | 0         | 0         | 0         | 0         | 0         | 0         | 0         | 0          | 2.39489    | 0          | hypothetical protein, conserved                                                 |
| PVX_084390 |         | 53.5127   | 74.6949   | 66.4889   | 0         | 33.9283   | 0         | 74.2991   | 40.5437   | 65.8158   | 53.2562    | 0          | 0          | small subunit rRNA processing factor, putative                                  |
| PVX_084395 |         | 0         | 0         | 0         | 0         | 6.96168   | 0         | 0         | 0         | 0         | 0          | 17.486     | 0          | hypothetical protein                                                            |
| PVX_084400 |         | 0         | 0         | 0         | 0         | 0         | 0         | 0         | 0         | 0         | 0          | 0          | 0          | hypothetical protein, conserved                                                 |
| PVX_084405 |         | 0         | 0         | 0         | 0         | 0         | 0         | 0         | 0         | 0         | 0          | 0          | 0          | hypothetical protein                                                            |
| PVX_084410 |         | 0         | 0         | 0         | 0         | 0         | 0         | 0         | 0         | 0         | 34.5553    | 0          | 0          | hypothetical protein, conserved                                                 |
| PVX_084415 |         | 0         | 0         | 0         | 0         | 0         | 0         | 0         | 0         | 0         | 90.8487    | 51.5343    | 0          | RNA-binding protein, putative                                                   |
| PVX_084417 |         | 0         | 0         | 0         | 0         | 18.548    | 0         | 89.4232   | 81.1983   | 22.1522   | 82.1639    | 104.734    | 0          | tRNA delta(2)-isopentenylpyrophosphate transferase, putative                    |
| PVX_084420 |         | 0         | 0         | 0         | 0         | 0         | 0         | 0         | 0         | 0         | 0          | 0          | 0          | 41K blood stage antigen precursor 41-3, putative                                |
| PVX_084425 |         | 0         | 0         | 0         | 0         | 0         | 0         | 51.328    | 0         | 0         | 0          | 0          | 0          | hypothetical protein, conserved                                                 |
| PVX_084430 |         | 0         | 0         | 0         | 0         | 23.1715   | 0         | 0         | 0         | 0         | 51.3004    | 14.5331    | 0          | hypothetical protein, conserved                                                 |
| PVX_084435 |         | 0         | 0         | 0         | 0         | 0         | 0         | 0         | 0         | 0         | 106.544    | 60.4545    | 0          | 50S ribosomal protein L29, putative                                             |
| PVX_084440 |         | 0         | 30.0986   | 17.856    | 0         | 6.83422   | 0         | 19.9606   | 5.44639   | 10.1067   | 12.8788    | 0          | 0          | hypothetical protein, conserved                                                 |
| PVX_084445 |         | 0         | 0         | 0         | 0         | 0         | 0         | 12.8319   | 3.50124   | 3.24848   | 9.19901    | 0          | 0          | cysteine repeat modular protein 3, putative (CRMP3)                             |
| PVX_084450 |         | 0         | 105.897   | 0         | 0         | 0         | 0         | 232.4     | 0         | 172.311   | 319.203    | 241.261    | 0          | hypothetical protein, conserved                                                 |
| PVX_084455 |         | 20.2623   | 0         | 50.3421   | 0         | 0         | 0         | 0         | 0         | 0         | 0          | 0          | 0          | amino acid transporter, putative                                                |
| PVX_084460 |         | 0         | 0         | 0         | 0         | 0         | 0         | 0         | 0         | 16.5179   | 0          | 8.6791     | 0          | hypothetical protein, conserved                                                 |
| PVX_084462 |         | 0         | 0         | 0         | 0         | 666.789   | 0         | 0         | 0         | 772.252   | 0          | 803.662    | 0          | mitochondrial import inner membrane translocase subunit TIM10, putative (TIM10) |
| PVX_084465 |         | 78.9353   | 0         | 196.44    | 0         | 0         | 404.257   | 120.815   | 109.653   | 59.8265   | 55.4616    | 47.1374    | 0          | hypothetical protein, conserved                                                 |
| PVX_084470 |         | 29.9233   | 20.8849   | 0         | 0         | 9.48679   | 0         | 0         | 0         | 0         | 10.515     | 5.95601    | 0          | zinc finger protein, putative                                                   |
| PVX_084475 |         | 0         | 0         | 0         | 0         | 6.75759   | 0         | 0         | 0         | 24.2279   | 0          | 12.7302    | 0          | hypothetical protein, conserved                                                 |
| PVX_084480 |         | 546.095   | 0         | 683.246   | 0         | 87.0847   | 0         | 0         | 380.028   | 103.612   | 0          | 54.3655    | 0          | hypothetical protein, conserved                                                 |
| PVX_084485 |         | 0         | 0         | 0         | 0         | 8.91971   | 0         | 0         | 0         | 0         | 0          | 0          | 0          | hypothetical protein, conserved                                                 |
| PVX_084490 |         | 152.782   | 0         | 0         | 0         | 48.5838   | 0         | 0         | 0         | 57.9277   | 53.6542    | 212.906    | 0          | U6 snRNA-associated Sm-like protein Lsm7, putative                              |
| PVX_084495 |         | 0         | 0         | 0         | 0         | 0         | 0         | 0         | 27.7169   | 15.1249   | 7.01562    | 7.94723    | 0          | zinc finger transcription factor, putative (KROX1)                              |
| PVX_084500 |         | 0         | 0         | 118.251   | 151.993   | 0         | 0         | 0         | 0         | 0         | 0          | 9.46637    | 0          | cytosolic iron-sulfur protein assembly protein 1, putative (CIA1)               |
| PVX_084505 |         | 0         | 0         | 0         | 0         | 10.0804   | 0         | 0         | 0         | 0         | 0          | 6.32845    | 0          | 3',5'-cyclic nucleotide phosphodiesterase, putative                             |
| PVX_084510 |         | 0         | 0         | 0         | 0         | 0         | 0         | 0         | 0         | 0         | 0          | 0          | 0          | porphobilinogen deaminase, putative (PBGD)                                      |
| PVX_084515 |         | 0         | 0         | 0         | 0         | 35.3706   | 0         | 170.594   | 154.722   | 0         | 78.2198    | 66.4936    | 0          | hypothetical protein, conserved                                                 |
| PVX_084519 |         | 0         | 0         | 0         | 0         | 155.537   | 0         | 0         | 0         | 185.152   | 0          | 194.33     | 397.251    | ATP synthase mitochondrial F1 complex assembly factor 1, putative (ATP11)       |

| Gene ID    | Patient | Patient 1 | Patient 2 | Patient 3 | Patient 4 | Patient 5 | Patient 6 | Patient 7 | Patient 8 | Patient 9 | Patient 10 | Patient 11 | Patient 12 | Gene Description                                                                |                                                                                 |
|------------|---------|-----------|-----------|-----------|-----------|-----------|-----------|-----------|-----------|-----------|------------|------------|------------|---------------------------------------------------------------------------------|---------------------------------------------------------------------------------|
| PVX_084521 | 0       | 19.2791   | 68.6455   | 0         | 0         | 0         | 0         | 0         | 0         | 10.4645   | 19.4139    | 21.9929    | 0          | ABC transporter, putative                                                       |                                                                                 |
| PVX_084525 | 60.7247 | 0         | 0         | 194.144   | 0         | 0         | 0         | 0         | 0         | 23.0093   | 21.3352    | 72.5237    | 0          | 50S ribosomal protein L1, apicoplast, putative (RPL1)                           |                                                                                 |
| PVX_084530 | 0       | 0         | 0         | 0         | 0         | 0         | 0         | 0         | 0         | 0         | 0          | 2.92541    | 0          | hypothetical protein                                                            |                                                                                 |
| PVX_084535 | 0       | 82.6323   | 0         | 0         | 37.5737   | 0         | 0         | 0         | 0         | 44.8275   | 0          | 0          | 0          | syntaxin 5, putative                                                            |                                                                                 |
| PVX_084540 | 0       | 0         | 0         | 0         | 0         | 0         | 0         | 0         | 0         | 0         | 8.55801    | 4.84736    | 0          | hypothetical protein, conserved                                                 |                                                                                 |
| PVX_084545 | 151.489 | 105.897   | 0         | 0         | 0         | 0         | 0         | 0         | 421.183   | 114.874   | 212.802    | 30.1576    | 0          | hypothetical protein, conserved                                                 |                                                                                 |
| PVX_084550 | 0       | 0         | 0         | 0         | 0         | 0         | 0         | 0         | 0         | 0         | 0          | 0          | 0          | hypothetical protein                                                            |                                                                                 |
| PVX_084555 | 30.5568 | 0         | 0         | 0         | 9.68777   | 0         | 0         | 0         | 0         | 0         | 0          | 36.4926    | 0          | general transcription factor 3C polypeptide 5, putative                         |                                                                                 |
| PVX_084560 | 152.881 | 0         | 0         | 0         | 24.2621   | 0         | 0         | 0         | 0         | 115.87    | 26.8547    | 91.2952    | 0          | hypothetical protein, conserved                                                 |                                                                                 |
| PVX_084565 | 22.1916 | 30.974    | 0         | 0         | 0         | 0         | 0         | 0         | 30.8103   | 25.2193   | 15.5968    | 35.3362    | 0          | hypothetical protein, conserved                                                 |                                                                                 |
| PVX_084570 | 0       | 0         | 0         | 0         | 22.4736   | 0         | 0         | 0         | 0         | 0         | 24.8792    | 14.096     | 0          | hypothetical protein, conserved                                                 |                                                                                 |
| PVX_084575 | 0       | 0         | 0         | 0         | 0         | 0         | 0         | 0         | 0         | 0         | 0          | 0          | 0          | mannosyltransferase, putative                                                   |                                                                                 |
| PVX_084580 | 0       | 0         | 0         | 0         | 0         | 0         | 0         | 0         | 0         | 0         | 0          | 0          | 0          | kinesin-7, putative                                                             |                                                                                 |
| PVX_084585 | 0       | 0         | 0         | 0         | 0         | 0         | 0         | 0         | 0         | 0         | 0          | 0          | 0          | heat shock protein, class I, putative                                           |                                                                                 |
| PVX_084590 | 40.497  | 28.2612   | 0         | 0         | 0         | 0         | 0         | 30.9335   | 56.224    | 46.0216   | 14.2312    | 28.2118    | 0          | hypothetical protein, conserved                                                 |                                                                                 |
| PVX_084595 | 0       | 16.3252   | 0         | 0         | 0         | 0         | 0         | 0         | 32.4778   | 0         | 8.22027    | 13.9681    | 0          | DNA replication licensing factor MCM8, putative (MCM8)                          |                                                                                 |
| PVX_084600 | 167.353 | 234.021   | 417.519   | 536.656   | 106.473   | 0         | 0         | 0         | 0         | 63.4587   | 176.301    | 33.3164    | 543.723    | DnaJ domain containing protein, heat shock protein DnaJ homologue Pf4, putative |                                                                                 |
| PVX_084605 | 0       | 0         | 146.079   | 0         | 55.9001   | 0         | 0         | 0         | 81.5715   | 0         | 41.2706    | 35.0719    | 95.1174    | hypothetical protein, conserved                                                 |                                                                                 |
| PVX_084610 | 0       | 0         | 0         | 0         | 0         | 0         | 0         | 16.3279   | 0         | 8.09927   | 7.51444    | 0          | 0          | lysine-specific histone demethylase 1, putative (LSD1)                          |                                                                                 |
| PVX_084615 | 65.9311 | 0         | 0         | 105.312   | 10.4521   | 0         | 0         | 0         | 0         | 0         | 34.7515    | 52.4925    | 0          | DNA replication licensing factor MCM5, putative                                 |                                                                                 |
| PVX_084620 | 394.314 | 137.668   | 326.979   | 420.281   | 62.5609   | 336.439   | 301.633   | 273.845   | 298.831   | 507.966   | 431.69     | 319.362    | 0          | polyubiquitin 5, putative                                                       |                                                                                 |
| PVX_084625 | 0       | 57.2479   | 50.9538   | 0         | 6.50039   | 0         | 31.3308   | 0         | 15.5374   | 21.6207   | 20.4099    | 0          | 0          | F-type ATPase4, putative                                                        |                                                                                 |
| PVX_084630 | 429.048 | 99.963    | 356.557   | 458.299   | 45.4673   | 0         | 0         | 198.796   | 162.664   | 0         | 56.9411    | 0          | 0          | glutathione peroxidase-like thioredoxin peroxidase, putative                    |                                                                                 |
| PVX_084635 | 0       | 29.8658   | 106.365   | 0         | 13.5683   | 0         | 0         | 0         | 113.465   | 75.1658   | 51.0957    | 0          | 0          | hypothetical protein, conserved                                                 |                                                                                 |
| PVX_084640 | 0       | 0         | 0         | 0         | 54.1514   | 0         | 0         | 0         | 322.731   | 239.088   | 67.7738    | 0          | 0          | hypothetical protein                                                            |                                                                                 |
| PVX_084645 | 179.188 | 62.5437   | 222.752   | 0         | 56.8298   | 0         | 0         | 124.418   | 67.889    | 188.884   | 107        | 0          | 0          | hypothetical protein, conserved                                                 |                                                                                 |
| PVX_084650 | 347.884 | 173.476   | 0         | 476.519   | 47.2908   | 0         | 0         | 207.053   | 282.444   | 366.7     | 178.06     | 80.4656    | 0          | DnaJ domain containing protein                                                  |                                                                                 |
| PVX_084655 | 0       | 0         | 0         | 0         | 43.986    | 0         | 0         | 192.332   | 104.918   | 48.5972   | 55.0919    | 224.599    | 0          | 0                                                                               | trafficking protein particle complex subunit 5, putative                        |
| PVX_084660 | 0       | 22.4547   | 159.916   | 102.773   | 10.2001   | 0         | 0         | 0         | 44.6706   | 0         | 45.2195    | 57.6317    | 52.0634    | 0                                                                               | succinyl-CoA ligase, putative                                                   |
| PVX_084665 | 54.7107 | 0         | 136.062   | 0         | 34.7117   | 279.991   | 0         | 0         | 0         | 0         | 38.4456    | 43.5604    | 0          | 0                                                                               | hypothetical protein, conserved                                                 |
| PVX_084670 | 0       | 210.367   | 0         | 0         | 143.538   | 0         | 0         | 0         | 0         | 0         | 52.8429    | 119.819    | 0          | 0                                                                               | hypothetical protein, conserved                                                 |
| PVX_084675 | 146.171 | 0         | 121.152   | 155.722   | 30.9086   | 0         | 74.5023   | 135.329   | 55.3813   | 119.838   | 77.5864    | 0          | 0          | 0                                                                               | hypothetical protein, conserved                                                 |
| PVX_084680 | 0       | 0         | 0         | 0         | 0         | 0         | 0         | 0         | 0         | 0         | 0          | 0          | 0          | 0                                                                               | hypothetical protein, conserved                                                 |
| PVX_084685 | 65.9554 | 23.0175   | 0         | 0         | 20.9118   | 0         | 100.801   | 91.5806   | 74.9596   | 69.5285   | 78.7678    | 0          | 0          | 0                                                                               | ribonucleoside-diphosphate reductase large chain, putative                      |
| PVX_084687 | 0       | 0         | 0         | 0         | 0         | 0         | 0         | 427.061   | 0         | 215.275   | 61.0764    | 0          | 0          | 0                                                                               | conserved Plasmodium protein, unknown function                                  |
| PVX_084690 | 37.8447 | 0         | 0         | 0         | 0         | 0         | 0         | 52.5507   | 14.3375   | 13.298    | 22.5983    | 0          | 0          | 0                                                                               | N-acetyltransferase, putative                                                   |
| PVX_084695 | 0       | 0         | 555.216   | 0         | 0         | 0         | 0         | 0         | 0         | 156.011   | 88.4776    | 0          | 0          | 0                                                                               | histidine triad protein, putative                                               |
| PVX_084698 | 0       | 0         | 0         | 0         | 0         | 0         | 0         | 0         | 0         | 57.4782   | 0          | 0          | 0          | 0                                                                               | ATP-dependent Clp protease proteolytic subunit, putative (ClpR)                 |
| PVX_084702 | 0       | 25.8262   | 0         | 0         | 0         | 0         | 0         | 0         | 0         | 42.0521   | 52.0046    | 22.0938    | 0          | 0                                                                               | ATP-dependent Clp protease proteolytic subunit, putative                        |
| PVX_084705 | 37.8927 | 0         | 0         | 0         | 0         | 0         | 0         | 0         | 0         | 0         | 0          | 22.627     | 0          | 0                                                                               | cGMP-dependent protein kinase, putative (PKG)                                   |
| PVX_084710 | 0       | 0         | 0         | 0         | 27.0387   | 0         | 0         | 118.322   | 64.555    | 0         | 50.8613    | 0          | 0          | 0                                                                               | GTP-binding protein, putative                                                   |
| PVX_084715 | 32.1023 | 0         | 0         | 0         | 10.1781   | 0         | 0         | 44.5744   | 24.3231   | 11.2805   | 44.7282    | 0          | 0          | 0                                                                               | hypothetical protein                                                            |
| PVX_084720 | 70.9208 | 0         | 0         | 0         | 22.4875   | 0         | 0         | 49.2388   | 80.6042   | 62.3017   | 35.2909    | 0          | 0          | 0                                                                               | translocon component PTEX150, putative (PTEX150)                                |
| PVX_084725 | 0       | 0         | 0         | 0         | 0         | 0         | 0         | 0         | 4.34389   | 0         | 4.56512    | 0          | 0          | 0                                                                               | hypothetical protein, conserved                                                 |
| PVX_084730 | 0       | 12.7148   | 45.2661   | 58.1826   | 11.5497   | 0         | 0         | 0         | 20.7056   | 12.8058   | 7.25309    | 0          | 0          | 0                                                                               | hypothetical protein, conserved                                                 |
| PVX_084735 | 56.4714 | 157.71    | 0         | 0         | 0         | 0         | 86.3706   | 0         | 85.5882   | 119.047   | 44.9624    | 91.4504    | 0          | 0                                                                               | glucose-6-phosphate isomerase, putative                                         |
| PVX_084740 | 122.634 | 0         | 0         | 0         | 0         | 0         | 375.921   | 0         | 46.4874   | 0         | 24.4125    | 0          | 0          | 0                                                                               | hypothetical protein, conserved                                                 |
| PVX_084745 | 138.026 | 48.1918   | 0         | 0         | 21.9007   | 0         | 0         | 52.3029   | 24.2463   | 27.4745   | 0          | 0          | 0          | 0                                                                               | GTPase Era, putative (ERA)                                                      |
| PVX_084750 | 0       | 78.1575   | 92.7764   | 0         | 0         | 0         | 0         | 51.8272   | 56.5607   | 26.23     | 66.8619    | 0          | 0          | 0                                                                               | ataxin-2 like protein, putative                                                 |
| PVX_084755 | 0       | 0         | 0         | 0         | 0         | 0         | 0         | 0         | 0         | 0         | 6.23908    | 0          | 0          | 0                                                                               | hypothetical protein, conserved                                                 |
| PVX_084760 | 0       | 0         | 422.279   | 0         | 0         | 0         | 0         | 0         | 128.359   | 59.4332   | 101.084    | 0          | 0          | 0                                                                               | hypothetical protein, conserved                                                 |
| PVX_084765 | 0       | 55.668    | 0         | 0         | 0         | 0         | 0         | 0         | 0         | 0         | 31.7329    | 129.165    | 0          | 0                                                                               | conserved protein, unknown function                                             |
| PVX_084770 | 29.8984 | 6.95404   | 49.5079   | 0         | 3.15808   | 0         | 15.2202   | 0         | 26.4248   | 21.0145   | 33.7217    | 16.1182    | 0          | 0                                                                               | NAD(P)H-dependent glutamate synthase, putative                                  |
| PVX_084775 | 0       | 0         | 0         | 0         | 0         | 0         | 0         | 0         | 0         | 0         | 11.66      | 0          | 0          | 0                                                                               | hypothetical protein, conserved                                                 |
| PVX_084780 | 0       | 60.466    | 215.489   | 0         | 27.4843   | 0         | 0         | 0         | 0         | 60.8243   | 51.6978    | 0          | 0          | 0                                                                               | ribonuclease H2 subunit B, putative                                             |
| PVX_084785 | 0       | 0         | 0         | 264.17    | 26.2137   | 0         | 0         | 114.716   | 93.8823   | 58.0193   | 65.7499    | 0          | 0          | 0                                                                               | cytochrome c oxidase assembly protein, putative                                 |
| PVX_084790 | 0       | 0         | 0         | 0         | 0         | 0         | 0         | 0         | 0         | 0         | 15.6161    | 0          | 0          | 0                                                                               | hypothetical protein, conserved                                                 |
| PVX_084795 | 205.455 | 143.468   | 170.384   | 0         | 108.664   | 0         | 314.356   | 380.505   | 233.561   | 240.608   | 272.643    | 0          | 0          | 0                                                                               | mitochondrial acidic protein MAM33, putative                                    |
| PVX_084800 | 0       | 0         | 0         | 0         | 0         | 0         | 0         | 0         | 0         | 0         | 0          | 0          | 0          | 0                                                                               | mitochondrial import inner membrane translocase subunit TIM17, putative (TIM17) |
| PVX_084805 | 183.293 | 42.6601   | 151.973   | 0         | 38.7701   | 312.738   | 0         | 0         | 0         | 150.264   | 72.9693    | 0          | 0          | 0                                                                               | methionine aminopeptidase 2, putative (METAP2)                                  |
| PVX_084810 | 8.2188  | 5.73437   | 10.2053   | 13.1173   | 6.51003   | 0         | 0         | 0         | 0         | 9.33897   | 11.5537    | 10.6329    | 0          | 0                                                                               | dynein-related AAA-type ATPase, putative                                        |
| PVX_084815 | 0       | 0         | 0         | 0         | 0         | 0         | 0         | 0         | 0         | 0         | 0          | 0          | 0          | 0                                                                               | hypothetical protein, conserved                                                 |

| Gene ID    | Patient 1 | Patient 2 | Patient 3 | Patient 4 | Patient 5 | Patient 6 | Patient 7 | Patient 8 | Patient 9 | Patient 10 | Patient 11 | Patient 12 | Gene Description                                                                      |
|------------|-----------|-----------|-----------|-----------|-----------|-----------|-----------|-----------|-----------|------------|------------|------------|---------------------------------------------------------------------------------------|
| Patient    |           |           |           |           |           |           |           |           |           |            |            |            |                                                                                       |
| PVX_084820 | 399.578   | 278.956   | 0         | 0         | 79.2144   | 0         | 305.506   | 971.104   | 246.015   | 333.442    | 159.07     | 0          | Hsp70/Hsp90 organizing protein, putative (HOP)                                        |
| PVX_084825 | 181.25    | 0         | 452.365   | 0         | 0         | 0         | 0         | 252.036   | 68.7346   | 63.6423    | 108.251    | 0          | calmodulin, putative                                                                  |
| PVX_084830 | 0         | 0         | 0         | 0         | 0         | 0         | 0         | 0         | 65.3012   | 30.2658    | 68.5985    | 0          | queuine tRNA-ribosyltransferase, putative                                             |
| PVX_084835 | 0         | 0         | 0         | 0         | 0         | 0         | 0         | 0         | 59.4517   | 0          | 31.2146    | 0          | ABC transporter, putative                                                             |
| PVX_084837 | 27.39     | 0         | 0         | 0         | 4.34009   | 0         | 0         | 0         | 10.375    | 0          | 2.72583    | 0          | protein kinase, putative                                                              |
| PVX_084840 | 0         | 0         | 0         | 0         | 0         | 0         | 0         | 0         | 5.19229   | 0          | 5.45666    | 0          | hypothetical protein, conserved                                                       |
| PVX_084845 | 0         | 0         | 0         | 0         | 0         | 0         | 0         | 0         | 12.6098   | 40.9445    | 33.129     | 80.7724    | hypothetical protein, conserved                                                       |
| PVX_084850 | 345.03    | 0         | 0         | 553.289   | 0         | 0         | 529.667   | 719.608   | 130.836   | 242.312    | 274.754    | 0          | microsomal signal peptidase 12 kDa subunit, putative                                  |
| PVX_084855 | 0         | 14.5048   | 0         | 0         | 26.352    | 106.26    | 63.5062   | 0         | 7.87338   | 14.608     | 53.7806    | 33.6251    | DNA topoisomerase II, putative                                                        |
| PVX_084860 | 26.6957   | 3.72526   | 13.2597   | 0         | 6.76674   | 27.2836   | 0         | 14.823    | 22.2453   | 11.2584    | 21.2536    | 8.63385    | hypothetical protein, conserved                                                       |
| PVX_084870 | 0         | 47.1011   | 0         | 0         | 0         | 0         | 0         | 0         | 0         | 23.6982    | 13.4266    | 0          | chromatin assembly factor 1 P55 subunit, putative                                     |
| PVX_084875 | 0         | 0         | 0         | 0         | 0         | 0         | 0         | 0         | 0         | 0          | 0          | 0          | hypothetical protein, conserved                                                       |
| PVX_084885 | 30.0641   | 62.9494   | 0         | 96.0354   | 9.53144   | 0         | 45.9431   | 41.7435   | 22.7785   | 21.1288    | 41.8882    | 0          | hypothetical protein, conserved                                                       |
| PVX_084895 | 0         | 461.463   | 0         | 0         | 105.176   | 0         | 0         | 458.593   | 250.023   | 577.73     | 196.72     | 0          | H/ACA ribonucleoprotein complex subunit 3, putative (NOP10)                           |
| PVX_084900 | 0         | 0         | 0         | 0         | 0         | 0         | 0         | 0         | 0         | 0          | 0          | 0          | SF-assemblin/beta giardin domain containing protein                                   |
| PVX_084905 | 52.1293   | 0         | 0         | 166.623   | 16.5359   | 0         | 159.437   | 144.793   | 39.5025   | 0          | 62.2575    | 0          | hypothetical protein, conserved                                                       |
| PVX_084910 | 0         | 0         | 0         | 0         | 0         | 0         | 291.378   | 0         | 0         | 66.6074    | 37.7667    | 0          | protein-L-isoaspartate O-methyltransferase beta-aspartate methyltransferase, putative |
| PVX_084915 | 25.8446   | 36.0743   | 0         | 0         | 0         | 0         | 0         | 0         | 9.79047   | 0          | 5.14414    | 0          | hypothetical protein, conserved                                                       |
| PVX_084920 | 71.4942   | 49.9258   | 0         | 0         | 0         | 0         | 0         | 0         | 81.2761   | 25.1176    | 28.4623    | 0          | RNA methyltransferase, putative                                                       |
| PVX_084925 | 0         | 0         | 0         | 0         | 0         | 0         | 0         | 0         | 0         | 0          | 0          | 0          | hypothetical protein, conserved                                                       |
| PVX_084930 | 0         | 13.249    | 47.1685   | 0         | 0         | 0         | 0         | 0         | 7.19181   | 0          | 15.1155    | 0          | hypothetical protein, conserved                                                       |
| PVX_084935 | 0         | 0         | 0         | 0         | 0         | 0         | 0         | 0         | 7.11482   | 0          | 14.9537    | 30.3842    | hypothetical protein, conserved                                                       |
| PVX_084940 | 208.811   | 97.2088   | 0         | 0         | 44.1767   | 0         | 213.001   | 96.6811   | 52.7506   | 97.8146    | 221.677    | 0          | voltage-dependent anion-selective channel protein, putative                           |
| PVX_084945 | 0         | 0         | 0         | 0         | 0         | 0         | 120.389   | 0         | 29.808    | 82.9       | 125.258    | 254.917    | syntaxin, putative                                                                    |
| PVX_084950 | 0         | 29.6953   | 0         | 0         | 0         | 0         | 0         | 0         | 0         | 0          | 8.46737    | 0          | hypothetical protein, conserved                                                       |
| PVX_084955 | 605.957   | 953.073   | 1133.31   | 485.568   | 144.513   | 0         | 697.2     | 421.183   | 1608.23   | 1383.21    | 1085.67    | 1229.9     | 60S ribosomal protein L14, putative                                                   |
| PVX_084960 | 0         | 0         | 0         | 0         | 0         | 0         | 0         | 0         | 0         | 26.5152    | 0          | 0          | ATP-specific succinyl-CoA synthetase beta subunit, putative                           |
| PVX_084965 | 0         | 0         | 0         | 0         | 13.766    | 0         | 0         | 0         | 0         | 0          | 8.63987    | 0          | mitogen-activated protein kinase 1, putative (MAPK1)                                  |
| PVX_084970 | 34.3182   | 0         | 0         | 0         | 0         | 0         | 52.4512   | 0         | 0         | 24.1181    | 20.4924    | 55.5406    | hypothetical protein, conserved                                                       |
| PVX_084975 | 0         | 24.0088   | 85.4949   | 0         | 10.9064   | 0         | 0         | 0         | 26.0624   | 36.2605    | 27.3863    | 0          | hypothetical protein, conserved                                                       |
| PVX_084980 | 0         | 0         | 0         | 0         | 0         | 0         | 0         | 0         | 0         | 0          | 0          | 0          | hypothetical protein, conserved                                                       |
| PVX_084985 | 0         | 0         | 0         | 0         | 0         | 0         | 0         | 0         | 0         | 72.7051    | 20.6008    | 0          | hypothetical protein, conserved                                                       |
| PVX_084990 | 0         | 212.877   | 0         | 0         | 96.8358   | 0         | 233.592   | 211.668   | 57.7304   | 0          | 30.3116    | 247.242    | 50S ribosomal protein L17, putative                                                   |
| PVX_084995 | 0         | 0         | 709.42    | 911.851   | 0         | 0         | 0         | 0         | 0         | 0          | 112.865    | 0          | cytochrome c oxidase subunit 2, putative                                              |
| PVX_085000 | 0         | 43.4014   | 0         | 0         | 0         | 0         | 0         | 0         | 0         | 21.8389    | 12.3727    | 0          | hypothetical protein, conserved                                                       |
| PVX_085005 | 47.1326   | 32.9033   | 234.381   | 0         | 0         | 0         | 65.4539   | 35.7149   | 33.1217   | 159.487    | 76.307     | 0          | glutamate dehydrogenase (NADP+), putative                                             |
| PVX_085010 | 0         | 0         | 101.414   | 0         | 12.9368   | 0         | 0         | 0         | 15.4554   | 14.3343    | 32.4799    | 66.0341    | exodeoxyribonuclease III, putative                                                    |
| PVX_085015 | 0         | 64.2622   | 0         | 0         | 0         | 0         | 140.869   | 127.818   | 139.469   | 96.9551    | 54.9401    | 0          | hypothetical protein, conserved                                                       |
| PVX_085020 | 0         | 0         | 0         | 0         | 0         | 0         | 0         | 0         | 0         | 18.6749    | 21.1593    | 0          | hypothetical protein, conserved                                                       |
| PVX_085025 | 41.3699   | 28.8679   | 0         | 0         | 13.1106   | 0         | 0         | 0         | 15.6705   | 48.4614    | 21.9578    | 22.3048    | hypothetical protein, conserved                                                       |
| PVX_085030 | 0         | 0         | 0         | 0         | 0         | 0         | 0         | 0         | 0         | 0          | 0          | 0          | aspartyl protease, putative                                                           |
| PVX_085035 | 0         | 0         | 0         | 0         | 0         | 0         | 0         | 0         | 0         | 0          | 21.3413    | 0          | serine/threonine protein phosphatase 2A activator, putative (PTPA)                    |
| PVX_085040 | 0         | 0         | 0         | 0         | 0         | 0         | 0         | 0         | 0         | 0          | 0          | 0          | hypothetical protein, conserved                                                       |
| PVX_085045 | 24.5473   | 0         | 0         | 0         | 0         | 0         | 0         | 0         | 0         | 0          | 4.88592    | 0          | ATP-dependent DNA helicase, putative                                                  |
| PVX_085050 | 95.9006   | 66.9283   | 59.5731   | 76.5721   | 30.3996   | 0         | 73.2622   | 166.436   | 72.6575   | 92.6756    | 114.529    | 0          | coatamer protein, beta subunit, putative                                              |
| PVX_085055 | 0         | 0         | 0         | 0         | 31.4474   | 0         | 151.658   | 0         | 37.5312   | 34.7846    | 59.1352    | 160.552    | ribosomal protein L15, putative                                                       |
| PVX_085060 | 209.705   | 146.702   | 0         | 0         | 66.7784   | 0         | 322.309   | 0         | 318.165   | 0          | 125.251    | 0          | hypothetical protein, conserved                                                       |
| PVX_085065 | 0         | 33.414    | 0         | 0         | 15.1812   | 0         | 73.1854   | 132.939   | 90.6726   | 33.6353    | 38.1085    | 0          | diphthamide synthesis protein, putative                                               |
| PVX_085070 | 13.2627   | 0         | 0         | 0         | 0         | 0         | 0         | 0         | 5.02376   | 4.66086    | 5.27956    | 0          | rRNA (adenosine-2'-O)-methyltransferase, putative                                     |
| PVX_085080 | 0         | 0         | 0         | 0         | 0         | 0         | 0         | 0         | 0         | 0          | 0          | 0          | CPW-WPC family protein, putative                                                      |
| PVX_085085 | 0         | 0         | 0         | 0         | 0         | 0         | 0         | 0         | 0         | 0          | 7.55194    | 0          | transcription factor with AP2 domain(s), putative (ApiAP2)                            |
| PVX_085090 | 0         | 0         | 0         | 0         | 35.6949   | 0         | 86.0443   | 78.1339   | 21.3163   | 59.2993    | 55.991     | 0          | 50S ribosomal protein L15, putative                                                   |
| PVX_085095 | 0         | 0         | 0         | 0         | 0         | 0         | 0         | 0         | 0         | 0          | 0          | 0          | hypothetical protein, conserved                                                       |
| PVX_085100 | 0         | 19.7674   | 0         | 0         | 0         | 0         | 0         | 39.3252   | 10.7295   | 9.95266    | 45.0996    | 0          | hypothetical protein, conserved                                                       |
| PVX_085105 | 223.243   | 0         | 0         | 0         | 0         | 0         | 0         | 0         | 84.6191   | 0          | 88.8793    | 0          | transcription initiation TFIIID-like, putative                                        |
| PVX_085110 | 0         | 0         | 0         | 348.228   | 0         | 0         | 0         | 0         | 41.2288   | 38.2072    | 0          | 0          | hypothetical protein, conserved                                                       |
| PVX_085115 | 127.892   | 0         | 0         | 0         | 0         | 0         | 0         | 0         | 48.4822   | 44.9188    | 76.3777    | 0          | peptide chain release factor 1, putative                                              |
| PVX_085120 | 0         | 0         | 0         | 0         | 0         | 0         | 0         | 0         | 20.5146   | 4.75817    | 8.08469    | 0          | protein kinase, putative                                                              |
| PVX_085125 | 286.332   | 159.932   | 0         | 366.138   | 163.509   | 0         | 175.177   | 238.604   | 368.873   | 442.651    | 250.775    | 278.219    | proliferation-associated protein 2g4, putative                                        |
| PVX_085130 | 0         | 0         | 0         | 117.629   | 0         | 0         | 0         | 0         | 69.7408   | 12.937     | 21.9847    | 0          | transporter, putative                                                                 |
| PVX_085135 | 38.9651   | 0         | 0         | 0         | 0         | 0         | 0         | 0         | 0         | 0          | 0          | 0          | WW domain-binding protein 11, putative                                                |
| PVX_085140 | 0         | 0         | 0         | 250.282   | 0         | 0         | 0         | 0         | 29.6516   | 0          | 77.8755    | 0          | hypothetical protein, conserved                                                       |

| Gene ID    | Patient 1 | Patient 2 | Patient 3 | Patient 4 | Patient 5 | Patient 6 | Patient 7 | Patient 8 | Patient 9 | Patient 10 | Patient 11 | Patient 12 | Gene Description                                                              |
|------------|-----------|-----------|-----------|-----------|-----------|-----------|-----------|-----------|-----------|------------|------------|------------|-------------------------------------------------------------------------------|
| Patient    |           |           |           |           |           |           |           |           |           |            |            |            |                                                                               |
| PVX_085145 | 279.156   | 129.996   | 231.664   | 0         | 236.373   | 476.756   | 427.455   | 775.686   | 564.262   | 555.693    | 537.162    | 150.845    | hypothetical protein, conserved                                               |
| PVX_085150 | 0         | 0         | 0         | 0         | 32.4925   | 0         | 0         | 0         | 38.7763   | 35.9372    | 81.4612    | 0          | exosome complex exonuclease RRP41, putative (RRP41)                           |
| PVX_085152 | 0         | 0         | 0         | 0         | 0         | 0         | 0         | 0         | 0         | 0          | 0          | 0          | conserved Plasmodium protein, unknown function                                |
| PVX_085155 | 155.663   | 0         | 0         | 165.849   | 16.4591   | 0         | 79.3483   | 0         | 39.3192   | 127.618    | 30.9844    | 0          | CorA-like Mg2+ transporter protein, putative                                  |
| PVX_085160 | 40.136    | 0         | 99.7745   | 128.245   | 0         | 205.313   | 0         | 111.467   | 15.2058   | 42.3088    | 31.9555    | 0          | DNA mismatch repair enzyme, putative                                          |
| PVX_085165 | 0         | 45.3561   | 161.587   | 207.696   | 61.8332   | 0         | 99.3742   | 0         | 49.2266   | 68.4639    | 25.8591    | 0          | hypothetical protein, conserved                                               |
| PVX_085170 | 0         | 29.4614   | 0         | 134.82    | 0         | 0         | 0         | 29.3058   | 0         | 7.41767    | 29.4096    | 0          | hypothetical protein                                                          |
| PVX_085175 | 118.416   | 82.7418   | 295.02    | 0         | 0         | 0         | 181.47    | 329.121   | 0         | 124.777    | 141.435    | 0          | selenoprotein, putative (Sel4)                                                |
| PVX_085180 | 0         | 10.9952   | 0         | 0         | 0         | 0         | 0         | 0         | 11.937    | 33.2232    | 9.4085     | 0          | hypothetical protein, conserved                                               |
| PVX_085185 | 0         | 0         | 0         | 88.9476   | 8.82806   | 0         | 0         | 0         | 0         | 0          | 33.2563    | 0          | hypothetical protein, conserved                                               |
| PVX_085190 | 387.621   | 0         | 483.886   | 0         | 61.6927   | 0         | 297.728   | 269.536   | 73.5043   | 204.145    | 347.264    | 315.076    | ubiquinol-cytochrome c reductase hinge protein, putative                      |
| PVX_085195 | 0         | 20.4258   | 0         | 0         | 9.2766    | 0         | 0         | 0         | 11.0877   | 10.2866    | 29.1306    | 0          | hypothetical protein, conserved                                               |
| PVX_085200 | 53.1157   | 0         | 0         | 84.8268   | 16.8382   | 0         | 0         | 0         | 40.2429   | 27.9975    | 68.7195    | 42.9719    | phosphoenolpyruvate carboxylase, putative (PEPC)                              |
| PVX_085203 | 22.8898   | 0         | 113.749   | 0         | 0         | 0         | 34.9715   | 0         | 8.67096   | 8.04369    | 4.5599     | 0          | conserved Plasmodium protein, unknown function                                |
| PVX_085205 | 94.9655   | 33.1479   | 0         | 0         | 15.0602   | 0         | 0         | 0         | 17.9901   | 50.0515    | 56.7078    | 0          | ATP-binding cassette sub-family G member 2, putative (ABCG2)                  |
| PVX_085209 | 0         | 0         | 0         | 0         | 0         | 0         | 0         | 0         | 0         | 0          | 0          | 0          | dynein-associated protein, putative                                           |
| PVX_085211 | 0         | 0         | 0         | 0         | 0         | 0         | 0         | 0         | 20.806    | 19.2935    | 10.9302    | 0          | dynein-associated protein, putative                                           |
| PVX_085215 | 89.5151   | 187.574   | 222.836   | 286.422   | 85.2632   | 458.587   | 137.054   | 248.726   | 135.7     | 314.46     | 124.731    | 145.097    | Probable protein arginine N-methyltransferase, putative                       |
| PVX_085220 | 329.773   | 806.975   | 0         | 0         | 209.794   | 846.629   | 759.183   | 687.737   | 875.311   | 868.521    | 426.728    | 267.836    | basic transcription factor 3b, putative                                       |
| PVX_085225 | 614.275   | 912.505   | 765.96    | 0         | 122.087   | 394.125   | 471.212   | 640.46    | 669.602   | 539.302    | 397.432    | 748.116    | 60S ribosomal protein L21, putative (RPL21)                                   |
| PVX_085230 | 187.468   | 0         | 0         | 0         | 0         | 0         | 143.533   | 0         | 71.0501   | 32.9274    | 130.611    | 0          | hypothetical protein, conserved                                               |
| PVX_085235 | 37.9088   | 52.922    | 0         | 0         | 12.0208   | 0         | 57.9456   | 0         | 14.3618   | 26.641     | 22.6366    | 122.716    | hypothetical protein                                                          |
| PVX_085240 | 174.322   | 60.8787   | 0         | 0         | 0         | 0         | 133.44    | 121.09    | 132.13    | 91.8582    | 34.7002    | 0          | hypothetical protein, conserved                                               |
| PVX_085245 | 0         | 0         | 0         | 0         | 0         | 0         | 0         | 0         | 0         | 0          | 0          | 0          | hypothetical protein, conserved                                               |
| PVX_085250 | 0         | 0         | 0         | 0         | 0         | 0         | 0         | 0         | 0         | 0          | 49.8051    | 407.316    | hypothetical protein, conserved                                               |
| PVX_085255 | 0         | 0         | 0         | 0         | 0         | 0         | 0         | 0         | 0         | 0          | 0          | 0          | DEAD/DEAH box helicase, putative                                              |
| PVX_085260 | 242.281   | 0         | 0         | 0         | 0         | 0         | 0         | 0         | 0         | 85.0979    | 24.115     | 0          | hypothetical protein, conserved                                               |
| PVX_085265 | 0         | 0         | 206.671   | 0         | 0         | 0         | 0         | 115.355   | 31.4684   | 87.5133    | 33.058     | 0          | enoyl-CoA hydratase, putative                                                 |
| PVX_085270 | 183.67    | 641.215   | 456.857   | 0         | 174.824   | 0         | 374.61    | 340.134   | 324.776   | 537.757    | 499.647    | 99.1587    | ribosomal protein L7A, putative                                               |
| PVX_085275 | 1066.83   | 812.983   | 724.445   | 0         | 461.975   | 1490.89   | 148.526   | 673.751   | 1065.98   | 885.786    | 868.761    | 628.949    | 60S ribosomal protein L5, putative                                            |
| PVX_085290 | 21.6285   | 30.1878   | 0         | 0         | 20.5669   | 0         | 33.0432   | 0         | 16.3862   | 22.8015    | 30.1346    | 0          | vacuolar protein sorting-associated protein 3, putative (VPS3)                |
| PVX_085295 | 21.0486   | 58.7564   | 0         | 0         | 13.3434   | 107.611   | 32.1566   | 87.6691   | 39.8669   | 88.7609    | 62.8427    | 34.0524    | hypothetical protein, conserved                                               |
| PVX_085300 | 0         | 0         | 0         | 0         | 0         | 0         | 0         | 81.3578   | 0         | 20.5813    | 0          | 0          | calcium-dependent protein kinase, putative                                    |
| PVX_085305 | 0         | 0         | 0         | 0         | 0         | 0         | 0         | 0         | 0         | 10.0001    | 0          | 0          | hypothetical protein                                                          |
| PVX_085310 | 0         | 0         | 52.5193   | 0         | 0         | 0         | 0         | 0         | 8.00729   | 0          | 4.20732    | 0          | hypothetical protein, conserved                                               |
| PVX_085315 | 33.5463   | 0         | 0         | 0         | 0         | 0         | 0         | 0         | 0         | 0          | 0          | 0          | serine/threonine protein phosphatase 7, putative (PP7)                        |
| PVX_085320 | 0         | 0         | 0         | 0         | 24.3246   | 0         | 0         | 0         | 58.0837   | 53.8474    | 45.7649    | 124.177    | cyclophilin, putative                                                         |
| PVX_085325 | 0         | 0         | 0         | 0         | 0         | 0         | 0         | 64.6029   | 0         | 16.3457    | 55.5581    | 0          | hypothetical protein, conserved                                               |
| PVX_085330 | 180.908   | 94.7168   | 0         | 0         | 28.688    | 231.391   | 0         | 62.8064   | 51.4058   | 63.5658    | 63.016     | 73.2181    | GTPase, putative                                                              |
| PVX_085335 | 0         | 0         | 0         | 0         | 0         | 0         | 0         | 0         | 0         | 0          | 13.2469    | 0          | 14-3-3 protein, putative                                                      |
| PVX_085340 | 69.9847   | 0         | 174.122   | 0         | 0         | 0         | 0         | 0         | 106.079   | 24.5875    | 125.376    | 113.377    | actin, putative                                                               |
| PVX_085345 | 95.4849   | 0         | 0         | 101.676   | 30.2736   | 0         | 48.6419   | 44.1938   | 120.577   | 44.7371    | 82.3576    | 0          | hypothetical protein                                                          |
| PVX_085350 | 0         | 0         | 0         | 0         | 0         | 0         | 0         | 0         | 26.8347   | 0          | 56.3841    | 0          | hypothetical protein, conserved                                               |
| PVX_085355 | 65.8157   | 0         | 0         | 0         | 41.7687   | 0         | 0         | 0         | 24.9392   | 46.2466    | 52.403     | 0          | ERAD-associated E3 ubiquitin-protein ligase HRD1, putative (HRD1)             |
| PVX_085360 | 76.3799   | 66.627    | 47.4404   | 0         | 18.1566   | 97.6173   | 0         | 79.5306   | 72.3324   | 60.3925    | 60.8105    | 30.8901    | hypothetical protein, conserved                                               |
| PVX_085365 | 0         | 0         | 0         | 0         | 0         | 0         | 144.443   | 131.054   | 107.25    | 0          | 18.7767    | 0          | DnaJ domain containing protein                                                |
| PVX_085370 | 0         | 0         | 0         | 0         | 38.8081   | 0         | 0         | 0         | 0         | 0          | 0          | 0          | hypothetical protein, conserved                                               |
| PVX_085375 | 193.55    | 0         | 0         | 0         | 61.4631   | 0         | 0         | 0         | 73.3566   | 203.97     | 57.7921    | 313.793    | hypothetical protein, conserved                                               |
| PVX_085380 | 0         | 0         | 0         | 0         | 0         | 0         | 0         | 0         | 118.874   | 219.788    | 0          | 0          | hypothetical protein, conserved                                               |
| PVX_085385 | 0         | 0         | 0         | 797.311   | 79.0701   | 0         | 381.744   | 0         | 376.473   | 261.228    | 49.3908    | 0          | copper transporter, putative                                                  |
| PVX_085390 | 0         | 0         | 0         | 0         | 0         | 0         | 0         | 0         | 0         | 0          | 36.5141    | 0          | hypothetical protein, conserved                                               |
| PVX_085395 | 93.919    | 0         | 0         | 0         | 0         | 0         | 195.64    | 53.3755   | 33.0001   | 9.34715    | 0          | 0          | hypothetical protein, conserved                                               |
| PVX_085405 | 0         | 480.154   | 1726.83   | 0         | 0         | 0         | 0         | 0         | 259.604   | 0          | 0          | 0          | mitochondrial import inner membrane translocase subunit TIM8, putative (TIM8) |
| PVX_085410 | 0         | 92.554    | 0         | 0         | 0         | 0         | 0         | 0         | 100.411   | 46.5131    | 0          | 0          | DNA-directed RNA polymerases III 39 kDa polypeptide, putative                 |
| PVX_085415 | 0         | 0         | 0         | 0         | 0         | 0         | 0         | 50.6233   | 0         | 0          | 0          | 0          | hypothetical protein, conserved                                               |
| PVX_085420 | 1529.32   | 2154.84   | 1939.77   | 2493.28   | 493.6     | 3996.97   | 3588.21   | 2138.63   | 2329.01   | 2141.82    | 1828.15    | 2526.11    | 40S ribosomal protein S25, putative                                           |
| PVX_085425 | 73.3626   | 51.2076   | 273.533   | 0         | 46.5249   | 0         | 56.0671   | 50.9347   | 97.2768   | 38.6678    | 167.928    | 118.738    | hypothetical protein, conserved                                               |
| PVX_085430 | 0         | 196.588   | 0         | 0         | 89.5606   | 0         | 432.496   | 0         | 0         | 0          | 279.505    | 457.547    | hypothetical protein, conserved                                               |
| PVX_085435 | 0         | 0         | 0         | 0         | 24.5776   | 0         | 0         | 0         | 0         | 27.2031    | 15.4134    | 0          | mannose-1-phosphate guanylyltransferase, putative                             |
| PVX_085440 | 0         | 0         | 0         | 0         | 0         | 0         | 0         | 0         | 0         | 0          | 43.6234    | 0          | dynein-associated protein, putative                                           |
| PVX_085445 | 0         | 0         | 0         | 0         | 0         | 0         | 0         | 0         | 11.5759   | 0          | 18.2463    | 0          | surface protein P113, putative (P113)                                         |
| PVX_085450 | 62.3753   | 0         | 0         | 0         | 0         | 0         | 0         | 0         | 23.635    | 43.8299    | 111.743    | 101.028    | pantothenate kinase, putative (PANK)                                          |



| Gene ID    | Patient | Patient 1 | Patient 2 | Patient 3 | Patient 4 | Patient 5 | Patient 6 | Patient 7 | Patient 8 | Patient 9 | Patient 10 | Patient 11 | Patient 12 | Gene Description                                               |
|------------|---------|-----------|-----------|-----------|-----------|-----------|-----------|-----------|-----------|-----------|------------|------------|------------|----------------------------------------------------------------|
| PVX_085455 |         | 31.2613   | 21.8191   | 0         | 0         | 19.8226   | 0         | 95.5489   | 130.219   | 35.5286   | 21.9701    | 18.667     | 0          | hypothetical protein, conserved                                |
| PVX_085460 |         | 38.4793   | 0         | 191.303   | 0         | 24.4038   | 0         | 117.637   | 0         | 58.3121   | 27.0419    | 45.9546    | 0          | glycine-tRNA ligase, putative                                  |
| PVX_085465 |         | 0         | 0         | 0         | 0         | 0         | 0         | 0         | 0         | 46.6153   | 0          | 0          | 0          | hypothetical protein, conserved                                |
| PVX_085470 |         | 26.3934   | 55.2609   | 0         | 0         | 8.36693   | 0         | 40.3289   | 0         | 9.9984    | 9.27471    | 10.5067    | 0          | hypothetical protein, conserved                                |
| PVX_085475 |         | 0         | 0         | 0         | 0         | 0         | 0         | 0         | 0         | 0         | 0          | 0          | 0          | hypothetical protein, conserved                                |
| PVX_085480 |         | 72.3613   | 50.5319   | 0         | 231.423   | 0         | 0         | 0         | 201.029   | 164.525   | 76.2665    | 100.827    | 0          | spliceosome-associated protein 49, putative                    |
| PVX_085485 |         | 44.004    | 92.1539   | 0         | 0         | 13.9557   | 0         | 0         | 122.214   | 66.6869   | 92.7707    | 87.5882    | 0          | YTH domain-containing protein, putative                        |
| PVX_085490 |         | 123.453   | 143.627   | 0         | 131.492   | 39.1499   | 421.023   | 125.816   | 114.287   | 233.858   | 216.893    | 204.773    | 0          | glutathione reductase, putative                                |
| PVX_085495 |         | 70.4807   | 98.4349   | 175.359   | 225.397   | 67.1016   | 0         | 107.845   | 293.701   | 267.078   | 321.902    | 154.323    | 114.182    | conserved Plasmodium protein, unknown function                 |
| PVX_085500 |         | 68.2241   | 0         | 0         | 0         | 21.6498   | 0         | 0         | 94.7635   | 0         | 0          | 27.1603    | 0          | hypothetical protein, conserved                                |
| PVX_085505 |         | 0         | 0         | 0         | 0         | 0         | 0         | 0         | 0         | 0         | 0          | 0          | 0          | hypothetical protein, conserved                                |
| PVX_085510 |         | 29.6201   | 62.0076   | 0         | 0         | 18.7743   | 0         | 22.6213   | 0         | 22.4397   | 26.023     | 26.5299    | 0          | hypothetical protein, conserved                                |
| PVX_085515 |         | 0         | 0         | 0         | 0         | 0         | 0         | 192.035   | 52.3779   | 0         | 82.5102    | 224.251    | 0          | glutathione S-transferase, putative                            |
| PVX_085520 |         | 50.1995   | 0         | 124.827   | 0         | 31.8459   | 0         | 69.7149   | 57.0594   | 141.105   | 89.9288    | 0          | 0          | thioredoxin-like protein, putative                             |
| PVX_085525 |         | 31.3269   | 21.8649   | 0         | 0         | 0         | 160.208   | 0         | 0         | 11.8678   | 0          | 18.7062    | 0          | ATP-dependent RNA helicase, putative                           |
| PVX_085530 |         | 0         | 0         | 65.0106   | 0         | 0         | 0         | 39.9749   | 0         | 9.9107    | 0          | 20.8292    | 0          | hypothetical protein, conserved                                |
| PVX_085535 |         | 0         | 0         | 0         | 0         | 0         | 0         | 43.1841   | 0         | 10.7058   | 0          | 22.4999    | 0          | DEAD/DEAH box ATP-dependent RNA helicase, putative             |
| PVX_085540 |         | 0         | 0         | 0         | 0         | 0         | 0         | 0         | 0         | 0         | 0          | 85.771     | 0          | calmodulin, putative                                           |
| PVX_085545 |         | 0         | 0         | 0         | 0         | 0         | 0         | 0         | 0         | 0         | 0          | 21.3158    | 0          | hypothetical protein, conserved                                |
| PVX_085550 |         | 0         | 0         | 0         | 0         | 0         | 0         | 0         | 0         | 0         | 0          | 5.11963    | 0          | liver specific protein 1, putative (LISP1)                     |
| PVX_085555 |         | 0         | 99.6922   | 0         | 0         | 45.3063   | 0         | 0         | 54.0976   | 75.2327   | 99.4592    | 0          | 0          | ubiquitin fusion degradation protein, putative                 |
| PVX_085560 |         | 0         | 0         | 0         | 0         | 0         | 0         | 157.243   | 0         | 38.9098   | 108.182    | 81.7415    | 166.463    | hypothetical protein                                           |
| PVX_085565 |         | 58.8239   | 20.5278   | 0         | 93.9505   | 9.32455   | 0         | 44.9456   | 40.8378   | 0         | 0          | 87.8134    | 47.5938    | DNA replication licensing factor MCM2, putative (MCM2)         |
| PVX_085567 |         | 0         | 0         | 0         | 0         | 0         | 0         | 0         | 0         | 0         | 0          | 36.8297    | 0          | conserved Plasmodium protein, unknown function                 |
| PVX_085570 |         | 0         | 13.7744   | 0         | 21.0067   | 0         | 0         | 27.4045   | 9.97004   | 0         | 7.85857    | 0          | 0          | hypothetical protein, conserved                                |
| PVX_085575 |         | 50.2558   | 140.34    | 0         | 0         | 0         | 0         | 0         | 57.1235   | 88.2898   | 60.0199    | 81.3706    | 0          | H/ACA ribonucleoprotein complex subunit 4, putative (CBF5)     |
| PVX_085580 |         | 0         | 0         | 0         | 0         | 0         | 0         | 0         | 0         | 0         | 0          | 5.45016    | 0          | hypothetical protein, conserved                                |
| PVX_085585 |         | 0         | 0         | 0         | 0         | 0         | 0         | 0         | 0         | 12.1094   | 0          | 19.0871    | 0          | cysteine protease ATG4, putative (ATG4)                        |
| PVX_085590 |         | 6.39707   | 17.8538   | 15.8875   | 20.4209   | 2.02694   | 0         | 0         | 8.80017   | 14.5381   | 13.4891    | 20.372     | 10.3449    | hypothetical protein, conserved                                |
| PVX_085595 |         | 119.682   | 0         | 0         | 0         | 0         | 0         | 0         | 45.3675   | 0         | 47.6494    | 0          | 0          | hypothetical protein, conserved                                |
| PVX_085600 |         | 0         | 0         | 0         | 0         | 32.8692   | 0         | 0         | 39.225    | 0         | 0          | 0          | 0          | hypothetical protein, conserved                                |
| PVX_085605 |         | 0         | 0         | 0         | 0         | 57.4429   | 0         | 0         | 251.018   | 68.457    | 63.3858    | 107.814    | 0          | prefoldin subunit 2, putative                                  |
| PVX_085610 |         | 47.736    | 33.3248   | 237.386   | 0         | 15.1407   | 0         | 0         | 0         | 36.1723   | 16.7728    | 9.50172    | 0          | lysine-tRNA ligase, putative                                   |
| PVX_085615 |         | 0         | 0         | 0         | 0         | 0         | 0         | 0         | 0         | 0         | 0          | 0          | 0          | hypothetical protein, conserved                                |
| PVX_085620 |         | 0         | 0         | 0         | 0         | 0         | 0         | 0         | 0         | 0         | 0          | 0          | 0          | hypothetical protein, conserved                                |
| PVX_085625 |         | 443.858   | 0         | 184.074   | 236.599   | 46.9571   | 0         | 113.207   | 411.037   | 140.165   | 311.872    | 235.605    | 119.857    | glutamate dehydrogenase (NADP+), putative                      |
| PVX_085630 |         | 0         | 0         | 121.02    | 0         | 15.4374   | 0         | 0         | 0         | 18.4404   | 0          | 9.68776    | 0          | hypothetical protein, conserved                                |
| PVX_085635 |         | 0         | 0         | 0         | 0         | 0         | 0         | 0         | 0         | 0         | 22.6569    | 0          | 0          | hypothetical protein, conserved                                |
| PVX_085640 |         | 0         | 0         | 0         | 0         | 0         | 0         | 23.7045   | 0         | 0         | 10.9074    | 12.3554    | 0          | hypothetical protein, conserved                                |
| PVX_085645 |         | 0         | 25.3234   | 0         | 0         | 11.5038   | 0         | 0         | 0         | 54.9782   | 25.4964    | 64.9915    | 58.7185    | hypothetical protein, conserved                                |
| PVX_085650 |         | 0         | 0         | 0         | 0         | 0         | 0         | 0         | 0         | 0         | 0          | 0          | 0          | hypothetical protein, conserved                                |
| PVX_085655 |         | 0         | 219.382   | 0         | 0         | 0         | 0         | 0         | 0         | 118.874   | 0          | 187.078    | 0          | zinc finger protein, putative                                  |
| PVX_085660 |         | 0         | 118.059   | 0         | 0         | 0         | 0         | 0         | 0         | 21.3566   | 0          | 44.8774    | 0          | dimethyladenosine transferase, putative                        |
| PVX_085665 |         | 236.637   | 41.3054   | 294.286   | 189.13    | 56.3071   | 302.797   | 0         | 164.33    | 89.6635   | 41.5706    | 117.756    | 0          | serine C-palmitoyltransferase, putative                        |
| PVX_085670 |         | 0         | 0         | 0         | 0         | 0         | 0         | 0         | 0         | 11.0766   | 0          | 5.81979    | 0          | hypothetical protein, conserved                                |
| PVX_085675 |         | 0         | 19.9379   | 0         | 0         | 18.113    | 0         | 0         | 0         | 0         | 10.0384    | 5.68603    | 0          | hypothetical protein, conserved                                |
| PVX_085680 |         | 58.5593   | 13.6219   | 48.4964   | 62.3347   | 12.3738   | 0         | 0         | 0         | 51.7593   | 61.736     | 58.2782    | 0          | hypothetical protein, conserved                                |
| PVX_085685 |         | 111.205   | 0         | 0         | 0         | 35.3265   | 0         | 0         | 154.53    | 126.455   | 39.0613    | 177.096    | 360.73     | RNA-binding protein Nova-1, putative                           |
| PVX_085690 |         | 0         | 422.437   | 0         | 0         | 0         | 0         | 0         | 419.844   | 114.458   | 105.827    | 60.0469    | 0          | RNA polymerase small subunit, putative                         |
| PVX_085695 |         | 0         | 0         | 0         | 0         | 0         | 0         | 92.6994   | 0         | 0         | 0          | 12.0627    | 0          | hypothetical protein, conserved                                |
| PVX_085700 |         | 102.19    | 0         | 254.479   | 327.093   | 0         | 0         | 0         | 0         | 0         | 35.8962    | 0          | 0          | uracil-DNA glycosylase, putative (UDG)                         |
| PVX_085705 |         | 31.3929   | 0         | 0         | 0         | 0         | 0         | 0         | 35.6782   | 44.1251   | 24.9941    | 0          | 0          | ATP-dependent protease, putative                               |
| PVX_085710 |         | 0         | 111.574   | 0         | 0         | 0         | 0         | 244.897   | 0         | 121.026   | 56.0443    | 190.628    | 259.2      | small nuclear ribonucleoprotein-associated protein B, putative |
| PVX_085715 |         | 0         | 0         | 0         | 0         | 8.27173   | 0         | 0         | 0         | 39.5387   | 9.16926    | 20.7745    | 0          | hypothetical protein, conserved                                |
| PVX_085720 |         | 0         | 0         | 170.515   | 219.17    | 108.747   | 0         | 0         | 0         | 51.9422   | 96.317     | 40.9277    | 222.056    | mRNA capping enzyme, putative                                  |
| PVX_085725 |         | 12.7415   | 0         | 0         | 40.6812   | 8.07566   | 0         | 0         | 0         | 0         | 4.47773    | 10.1442    | 0          | hypothetical protein, conserved                                |
| PVX_085730 |         | 478.09    | 250.55    | 297.787   | 382.76    | 151.906   | 0         | 183.173   | 498.303   | 271.841   | 503.772    | 404.479    | 0          | serine/threonine protein phosphatase PP1, putative (PP1)       |
| PVX_085735 |         | 1026.59   | 1219.19   | 255.65    | 1314.39   | 456.465   | 1578.38   | 1572.43   | 855.849   | 1478.57   | 865.459    | 899.157    | 166.463    | 60S ribosomal protein L10, putative                            |
| PVX_085740 |         | 0         | 73.8376   | 263.22    | 0         | 0         | 0         | 0         | 146.857   | 120.178   | 111.375    | 63.1164    | 0          | hypothetical protein, conserved                                |
| PVX_085745 |         | 0         | 25.6564   | 0         | 0         | 11.6551   | 0         | 0         | 51.0393   | 27.8505   | 0          | 21.9486    | 0          | hypothetical protein, conserved                                |
| PVX_085750 |         | 108.773   | 0         | 0         | 0         | 0         | 0         | 166.641   | 302.291   | 123.687   | 76.4145    | 151.568    | 0          | 26S proteasome regulatory subunit RPN13, putative (RPN13)      |
| PVX_085755 |         | 0         | 100.349   | 0         | 0         | 0         | 245.162   | 0         | 66.5407   | 108.924   | 50.5069    | 19.0747    | 0          | DnaJ domain containing protein                                 |

| Gene ID    | Patient 1 | Patient 2 | Patient 3 | Patient 4 | Patient 5 | Patient 6 | Patient 7 | Patient 8 | Patient 9 | Patient 10 | Patient 11 | Patient 12 | Gene Description                                                   |
|------------|-----------|-----------|-----------|-----------|-----------|-----------|-----------|-----------|-----------|------------|------------|------------|--------------------------------------------------------------------|
| Patient    |           |           |           |           |           |           |           |           |           |            |            |            |                                                                    |
| PVX_085760 | 0         | 101.064   | 0         | 0         | 22.9651   | 0         | 110.73    | 0         | 54.8416   | 0          | 28.8076    | 0          | diphthamide synthesis protein, putative                            |
| PVX_085765 | 0         | 0         | 0         | 0         | 0         | 0         | 0         | 0         | 0         | 0          | 4.89397    | 0          | hypothetical protein, conserved                                    |
| PVX_085770 | 0         | 35.6459   | 0         | 0         | 0         | 0         | 0         | 0         | 0         | 0          | 0          | 0          | hypothetical protein                                               |
| PVX_085775 | 0         | 0         | 0         | 0         | 0         | 0         | 0         | 0         | 0         | 0          | 62.6723    | 0          | FeS assembly ATPase SufC, putative (SufC)                          |
| PVX_085780 | 0         | 31.3503   | 0         | 0         | 14.2431   | 0         | 0         | 0         | 0         | 15.7798    | 35.7562    | 72.703     | 30S ribosomal protein S9, putative                                 |
| PVX_085785 | 0         | 0         | 0         | 0         | 171.908   | 0         | 0         | 0         | 0         | 0          | 0          | 0          | hypothetical protein                                               |
| PVX_085790 | 0         | 0         | 0         | 0         | 0         | 0         | 0         | 0         | 0         | 0          | 0          | 0          | Sperm-specific protein Don juan, putative                          |
| PVX_085795 | 0         | 0         | 0         | 0         | 0         | 0         | 0         | 0         | 0         | 0          | 0          | 0          | hypothetical protein, conserved                                    |
| PVX_085800 | 0         | 0         | 0         | 0         | 0         | 0         | 0         | 0         | 0         | 0          | 0          | 0          | hypothetical protein                                               |
| PVX_085810 | 0         | 0         | 0         | 0         | 40.4699   | 0         | 0         | 0         | 0         | 0          | 25.3505    | 0          | ubiquitin-conjugating enzyme, putative                             |
| PVX_085815 | 0         | 203.432   | 0         | 186.293   | 0         | 0         | 0         | 0         | 44.1601   | 40.9482    | 57.9963    | 0          | glycylpeptide N-tetradecanoyltransferase, putative (NMT)           |
| PVX_085820 | 0         | 18.6014   | 0         | 0         | 0         | 0         | 0         | 37.0057   | 20.1934   | 28.0976    | 10.61      | 0          | AAA family ATPase, putative                                        |
| PVX_085825 | 47.7615   | 33.3426   | 0         | 0         | 0         | 0         | 0         | 66.3276   | 36.1916   | 67.127     | 9.50679    | 0          | deoxyhypusine synthase, putative                                   |
| PVX_085830 | 0         | 208.867   | 0         | 0         | 31.6327   | 0         | 0         | 0         | 132.248   | 35.0405    | 69.4769    | 0          | actin II                                                           |
| PVX_085835 | 33.4774   | 7.78658   | 27.718    | 0         | 7.07245   | 0         | 0         | 15.4914   | 0         | 15.6866    | 19.9898    | 0          | hypothetical protein, conserved                                    |
| PVX_085840 | 151.746   | 212.154   | 1135.24   | 486.394   | 96.5061   | 0         | 0         | 0         | 345.206   | 266.453    | 241.67     | 0          | nuclear transport factor 2, putative (NTF2)                        |
| PVX_085845 | 0         | 0         | 0         | 130.174   | 0         | 0         | 0         | 0         | 0         | 0          | 0          | 0          | hypothetical protein, conserved                                    |
| PVX_085850 | 57.538    | 0         | 71.4944   | 91.8952   | 45.6029   | 0         | 0         | 0         | 10.8985   | 20.2188    | 51.5362    | 46.5526    | hypothetical protein, conserved                                    |
| PVX_085855 | 0         | 0         | 0         | 0         | 0         | 0         | 0         | 0         | 0         | 10.4064    | 5.89561    | 0          | hypothetical protein, conserved                                    |
| PVX_085860 | 0         | 0         | 0         | 0         | 0         | 0         | 0         | 0         | 48.0697   | 44.5372    | 0          | 0          | S1/P1 nuclease, putative                                           |
| PVX_085865 | 161.467   | 0         | 0         | 0         | 17.0736   | 0         | 82.312    | 0         | 0         | 0          | 107.133    | 0          | hypothetical protein, conserved                                    |
| PVX_085870 | 0         | 43.2811   | 154.188   | 0         | 0         | 0         | 0         | 86.0942   | 46.9753   | 21.7784    | 61.6923    | 100.397    | hypothetical protein, conserved                                    |
| PVX_085875 | 0         | 0         | 0         | 0         | 18.8064   | 0         | 0         | 0         | 0         | 0          | 11.799     | 0          | GTP-binding protein, putative                                      |
| PVX_085877 | 35.5167   | 24.7905   | 0         | 0         | 45.0465   | 0         | 0         | 49.317    | 0         | 12.4801    | 21.2081    | 0          | conserved Plasmodium protein, unknown function                     |
| PVX_085880 | 0         | 0         | 0         | 0         | 5.27226   | 0         | 0         | 0         | 18.9041   | 5.84596    | 16.5553    | 26.9091    | plastid replication-repair enzyme, putative (PREX)                 |
| PVX_085885 | 0         | 138.176   | 0         | 0         | 0         | 0         | 0         | 0         | 49.9888   | 0          | 131.297    | 0          | hypothetical protein, conserved                                    |
| PVX_085890 | 39.4982   | 27.571    | 0         | 0         | 0         | 0         | 0         | 54.8478   | 0         | 0          | 23.5858    | 0          | rhomboid protease ROM8, putative (ROM8)                            |
| PVX_085895 | 97.407    | 0         | 0         | 0         | 61.8654   | 0         | 0         | 0         | 36.918    | 68.4339    | 19.3899    | 0          | hypothetical protein, conserved                                    |
| PVX_085900 | 14.2921   | 0         | 35.503    | 45.6337   | 0         | 0         | 0         | 0         | 0         | 5.02259    | 0          | 0          | hypothetical protein, conserved                                    |
| PVX_085905 | 0         | 71.9075   | 0         | 164.607   | 16.3358   | 0         | 0         | 71.5211   | 0         | 18.0948    | 102.509    | 83.387     | ribosome maturation protein SBDS, putative                         |
| PVX_085910 | 0         | 0         | 0         | 0         | 0         | 0         | 0         | 0         | 0         | 0          | 0          | 0          | hypothetical protein, conserved                                    |
| PVX_085915 | 0         | 0         | 0         | 0         | 34.3008   | 0         | 0         | 0         | 40.9301   | 37.9308    | 42.9916    | 0          | hypothetical protein, conserved                                    |
| PVX_085920 | 143.284   | 133.37    | 237.513   | 152.643   | 60.595    | 733.129   | 0         | 198.983   | 253.341   | 234.944    | 199.643    | 77.3265    | eukaryotic translation initiation factor 2 gamma subunit, putative |
| PVX_085925 | 0         | 0         | 0         | 0         | 0         | 0         | 0         | 0         | 0         | 0          | 0          | 0          | hypothetical protein, conserved                                    |
| PVX_085930 | 52.0384   | 0         | 0         | 0         | 0         | 0         | 0         | 0         | 0         | 0          | 0          | 0          | rhoGTPase-associated protein 1, putative (RAP1)                    |
| PVX_085935 | 0         | 15.4515   | 0         | 0         | 4.67793   | 0         | 22.5446   | 30.7411   | 2.79598   | 5.18838    | 10.2845    | 11.9375    | hypothetical protein, conserved                                    |
| PVX_085940 | 0         | 26.3827   | 93.9532   | 0         | 23.9705   | 0         | 0         | 52.4841   | 42.9581   | 53.1245    | 60.1858    | 0          | CTP synthase, putative                                             |
| PVX_085945 | 0         | 0         | 0         | 0         | 0         | 0         | 0         | 0         | 0         | 0          | 0          | 0          | hypothetical protein, conserved                                    |
| PVX_085950 | 0         | 92.1442   | 0         | 0         | 0         | 676.322   | 0         | 0         | 99.9671   | 46.3076    | 131.235    | 213.971    | hypothetical protein, conserved                                    |
| PVX_085955 | 52.3122   | 36.5216   | 0         | 0         | 16.594    | 0         | 79.9987   | 0         | 19.8206   | 91.9014    | 41.6506    | 0          | cytidine diphosphate-diacylglycerol synthase, putative             |
| PVX_085960 | 0         | 0         | 0         | 0         | 86.0082   | 0         | 0         | 0         | 154.056   | 214.253    | 80.9258    | 0          | RNA-binding protein, putative                                      |
| PVX_085965 | 0         | 28.7518   | 0         | 0         | 0         | 0         | 0         | 0         | 46.8146   | 28.9457    | 16.3969    | 66.6731    | hypothetical protein, conserved                                    |
| PVX_085970 | 49.7911   | 208.495   | 0         | 79.5137   | 7.89182   | 127.293   | 38.0384   | 34.5653   | 103.74    | 52.4907    | 104.06     | 80.5607    | hypothetical protein                                               |
| PVX_085975 | 0         | 30.1688   | 0         | 0         | 0         | 0         | 0         | 0         | 65.495    | 30.3712    | 34.4093    | 0          | hypothetical protein, conserved                                    |
| PVX_085977 | 0         | 33.8176   | 0         | 77.3811   | 7.68018   | 0         | 0         | 0         | 18.3562   | 0          | 14.4673    | 0          | conserved Plasmodium protein, unknown function                     |
| PVX_085980 | 0         | 0         | 0         | 0         | 0         | 0         | 0         | 0         | 0         | 0          | 91.2453    | 0          | hypothetical protein, conserved                                    |
| PVX_085985 | 90.6026   | 63.2852   | 0         | 289.91    | 57.5342   | 0         | 138.724   | 0         | 0         | 63.6556    | 126.246    | 293.728    | DNA damage-inducible protein 1, putative (DDI1)                    |
| PVX_085990 | 131.269   | 0         | 0         | 841.03    | 166.882   | 0         | 201.25    | 0         | 0         | 92.208     | 78.3946    | 0          | hypothetical protein, conserved                                    |
| PVX_085995 | 113.077   | 0         | 0         | 90.2974   | 8.96201   | 0         | 0         | 0         | 21.4183   | 19.8676    | 22.507     | 0          | oxidoreductase, aldo/keto reductase domain containing protein      |
| PVX_086000 | 148.024   | 0         | 0         | 0         | 15.6505   | 0         | 0         | 0         | 56.0838   | 156.031    | 49.1065    | 0          | hypothetical protein, conserved                                    |
| PVX_086005 | 0         | 0         | 0         | 0         | 0         | 0         | 0         | 0         | 0         | 0          | 41.5379    | 169.188    | tRNA-dihydrouridine synthase, putative                             |
| PVX_086010 | 0         | 0         | 0         | 0         | 0         | 0         | 0         | 0         | 0         | 0          | 0          | 0          | hypothetical protein, conserved                                    |
| PVX_086015 | 13.5982   | 3.16258   | 11.2567   | 28.9377   | 2.87231   | 0         | 20.7636   | 18.8762   | 13.7348   | 9.55799    | 24.3588    | 14.6593    | hypothetical protein, conserved                                    |
| PVX_086020 | 1581.25   | 1444.91   | 606.134   | 779.092   | 270.546   | 0         | 1304.95   | 1352.31   | 1567.67   | 1965.23    | 1234.88    | 197.338    | 40S ribosomal protein S8e, putative                                |
| PVX_086022 | 0         | 631.518   | 0         | 0         | 0         | 0         | 0         | 0         | 0         | 210.944    | 59.8451    | 0          | conserved Plasmodium protein, unknown function                     |
| PVX_086025 | 104.862   | 36.5923   | 0         | 83.7327   | 8.31052   | 0         | 0         | 0         | 19.862    | 64.4856    | 46.9618    | 42.4176    | DNA repair helicase, putative                                      |
| PVX_086030 | 0         | 0         | 0         | 0         | 0         | 0         | 0         | 0         | 0         | 0          | 0          | 0          | hypothetical protein                                               |
| PVX_086035 | 0         | 13.932    | 0         | 0         | 0         | 0         | 0         | 0         | 45.3747   | 14.0312    | 23.8417    | 0          | transcription factor with AP2 domain(s), putative (AP2-G2)         |
| PVX_086040 | 0         | 0         | 0         | 0         | 0         | 0         | 0         | 0         | 58.9935   | 0          | 123.95     | 0          | plasmepsin IV, putative (PM4)                                      |
| PVX_086045 | 0         | 0         | 0         | 0         | 0         | 0         | 0         | 0         | 0         | 0          | 0          | 0          | hypothetical protein, conserved                                    |
| PVX_086050 | 0         | 0         | 0         | 0         | 0         | 0         | 0         | 0         | 5.65769   | 5.2489     | 0          | 0          | hypothetical protein                                               |
| PVX_086055 | 486.602   | 0         | 0         | 0         | 312.028   | 0         | 0         | 0         | 0         | 0          | 193.826    | 0          | hypothetical protein, conserved                                    |

| Gene ID    | Patient 1 | Patient 2 | Patient 3 | Patient 4 | Patient 5 | Patient 6 | Patient 7 | Patient 8 | Patient 9 | Patient 10 | Patient 11 | Patient 12 | Gene Description                                                               |
|------------|-----------|-----------|-----------|-----------|-----------|-----------|-----------|-----------|-----------|------------|------------|------------|--------------------------------------------------------------------------------|
| Patient    |           |           |           |           |           |           |           |           |           |            |            |            |                                                                                |
| PVX_086060 | 0         | 142.68    | 0         | 654.753   | 0         | 0         | 0         | 0         | 0         | 0          | 0          | 0          | hypothetical protein, conserved                                                |
| PVX_086065 | 0         | 104.784   | 0         | 479.72    | 0         | 0         | 76.5047   | 277.924   | 151.648   | 140.632    | 89.6271    | 81.0062    | pre-mRNA-splicing factor 38B, putative (PRP38B)                                |
| PVX_086070 | 0         | 0         | 0         | 0         | 0         | 0         | 0         | 0         | 0         | 0          | 28.7843    | 0          | hypothetical protein, conserved                                                |
| PVX_086075 | 64.0723   | 492.125   | 0         | 204.865   | 0         | 327.992   | 0         | 0         | 48.5566   | 270.132    | 89.2757    | 103.782    | fibrillarin, putative                                                          |
| PVX_086080 | 0         | 16.7996   | 0         | 0         | 0         | 0         | 0         | 0         | 0         | 0          | 9.58258    | 0          | multidomain scavenger receptor, putative                                       |
| PVX_086085 | 100.695   | 0         | 0         | 0         | 31.9794   | 0         | 0         | 0         | 0         | 35.3714    | 40.0889    | 0          | Fe-S-cluster redox enzyme, putative                                            |
| PVX_086090 | 0         | 0         | 0         | 0         | 0         | 0         | 140.724   | 0         | 0         | 0          | 18.2945    | 148.981    | glideosome associated protein with multiple membrane spans 3, putative (GAPM3) |
| PVX_086095 | 139.234   | 0         | 0         | 0         | 0         | 0         | 193.531   | 105.571   | 0         | 0          | 55.4348    | 0          | vacuolar protein sorting-associated protein 29, putative (VPS29)               |
| PVX_086100 | 25.8222   | 0         | 0         | 0         | 8.18575   | 0         | 0         | 0         | 9.78199   | 27.2221    | 5.13968    | 41.7807    | ATP-dependent Clp protease, putative                                           |
| PVX_086105 | 0         | 0         | 0         | 0         | 0         | 0         | 28.2527   | 30.8346   | 21.4536   | 24.3025    | 0          | 0          | hypothetical protein, conserved                                                |
| PVX_086110 | 55.115    | 0         | 0         | 176.181   | 17.4843   | 0         | 84.2925   | 0         | 62.6488   | 58.0945    | 120.677    | 0          | hypothetical protein, conserved                                                |
| PVX_086115 | 57.2297   | 0         | 0         | 182.952   | 0         | 0         | 0         | 0         | 21.6845   | 0          | 11.3916    | 0          | glycerophosphodiester phosphodiesterase, putative (GDPD)                       |
| PVX_086120 | 43.5451   | 60.7694   | 27.0401   | 69.5118   | 6.89948   | 55.6392   | 33.2519   | 75.5629   | 45.3588   | 49.7351    | 47.6691    | 52.8204    | hypothetical protein, conserved                                                |
| PVX_086125 | 82.0099   | 0         | 0         | 0         | 8.66615   | 0         | 0         | 37.9554   | 10.3558   | 38.4245    | 16.3234    | 0          | hypothetical protein, conserved                                                |
| PVX_086130 | 158.745   | 110.979   | 0         | 0         | 50.4871   | 0         | 0         | 0         | 120.381   | 55.7463    | 31.6023    | 0          | RNA-binding protein, putative                                                  |
| PVX_086135 | 0         | 0         | 0         | 0         | 0         | 0         | 0         | 0         | 0         | 0          | 7.5469     | 0          | hypothetical protein                                                           |
| PVX_086140 | 125.176   | 87.3678   | 0         | 0         | 29.7651   | 0         | 0         | 0         | 47.4212   | 21.9931    | 31.1443    | 0          | RNA-binding protein, putative                                                  |
| PVX_086145 | 27.6748   | 77.2597   | 0         | 0         | 8.77342   | 0         | 0         | 153.7     | 52.4196   | 97.2494    | 38.559     | 0          | hypothetical protein, conserved                                                |
| PVX_086150 | 0         | 0         | 0         | 0         | 0         | 0         | 0         | 0         | 0         | 15.5921    | 0          | 0          | circumsporozoite protein, putative                                             |
| PVX_086155 | 66.7484   | 0         | 332.11    | 0         | 63.5424   | 0         | 102.122   | 278.137   | 202.343   | 117.254    | 146.151    | 0          | ribonucleoside-diphosphate reductase small chain, putative                     |
| PVX_086160 | 132.509   | 92.527    | 164.823   | 0         | 21.0237   | 0         | 101.365   | 0         | 25.1055   | 23.2773    | 52.7522    | 107.322    | COBW domain-containing protein 1, putative (CBWD1)                             |
| PVX_086165 | 0         | 14.6684   | 104.446   | 0         | 6.66231   | 0         | 0         | 0         | 39.8107   | 44.3179    | 16.7344    | 0          | DNA mismatch repair protein, putative                                          |
| PVX_086170 | 33.471    | 23.362    | 0         | 0         | 0         | 0         | 51.1551   | 46.4756   | 0         | 35.2843    | 46.6353    | 54.1683    | hypothetical protein, conserved                                                |
| PVX_086175 | 0         | 0         | 0         | 0         | 0         | 0         | 0         | 0         | 0         | 0          | 0          | 0          | trafficking protein particle complex subunit 1, putative (BET5)                |
| PVX_086180 | 64.9502   | 0         | 0         | 0         | 10.2964   | 0         | 0         | 0         | 12.3028   | 45.646     | 32.3197    | 52.555     | GTPase-activating protein, putative                                            |
| PVX_086185 | 86.5609   | 60.4252   | 215.202   | 276.609   | 0         | 0         | 0         | 60.102    | 32.795    | 30.4152    | 60.3036    | 0          | hypothetical protein, conserved                                                |
| PVX_086190 | 0         | 81.9814   | 0         | 0         | 0         | 0         | 0         | 326.098   | 88.9492   | 0          | 93.4244    | 0          | hypothetical protein, conserved                                                |
| PVX_086195 | 149.482   | 26.0851   | 0         | 0         | 0         | 191.151   | 114.244   | 51.8922   | 56.6315   | 52.5257    | 52.0688    | 0          | hypothetical protein, conserved                                                |
| PVX_086200 | 0         | 0         | 0         | 0         | 0         | 0         | 0         | 0         | 0         | 0          | 0          | 0          | hypothetical protein, conserved                                                |
| PVX_086205 | 0         | 0         | 0         | 0         | 0         | 0         | 0         | 0         | 0         | 0          | 0          | 58.7185    | adenylyl cyclase alpha, putative                                               |
| PVX_086210 | 115.717   | 201.984   | 0         | 0         | 0         | 0         | 88.4964   | 0         | 21.9229   | 60.9856    | 46.0671    | 93.7007    | rRNA biogenesis protein RRP5, putative (RRP5)                                  |
| PVX_086215 | 0         | 0         | 0         | 0         | 84.7421   | 0         | 0         | 0         | 0         | 0          | 52.912     | 0          | 50S ribosomal protein L16, putative                                            |
| PVX_086220 | 0         | 0         | 0         | 0         | 0         | 0         | 0         | 0         | 0         | 106.544    | 60.4545    | 0          | secreted ookinete adhesive protein, putative (SOAP)                            |
| PVX_086225 | 0         | 0         | 0         | 0         | 0         | 0         | 0         | 0         | 0         | 0          | 0          | 0          | hypothetical protein, conserved                                                |
| PVX_086230 | 426.405   | 0         | 0         | 0         | 67.8979   | 0         | 0         | 0         | 0         | 224.55     | 127.34     | 0          | cytochrome c, putative                                                         |
| PVX_086235 | 189.855   | 132.619   | 0         | 0         | 0         | 0         | 131.889   | 107.933   | 66.6926   | 18.8962    | 18.8962    | 0          | DNA-directed RNA polymerase II subunit RPB4, putative                          |
| PVX_086240 | 152.361   | 266.007   | 0         | 487.326   | 120.897   | 0         | 116.588   | 423.292   | 288.687   | 240.87     | 318.445    | 123.436    | acid phosphatase, putative                                                     |
| PVX_086245 | 0         | 0         | 0         | 0         | 0         | 0         | 0         | 0         | 0         | 0          | 3.98696    | 0          | nuclear formin-like protein, putative (MISFIT)                                 |
| PVX_086250 | 0         | 0         | 0         | 0         | 32.088    | 0         | 0         | 0         | 0         | 0          | 20.1123    | 0          | hypothetical protein, conserved                                                |
| PVX_086255 | 0         | 0         | 0         | 0         | 0         | 0         | 0         | 0         | 0         | 0          | 0          | 0          | selenoprotein, putative (Sel1)                                                 |
| PVX_086260 | 0         | 0         | 0         | 0         | 0         | 0         | 0         | 0         | 0         | 0          | 58.4355    | 0          | hypothetical protein                                                           |
| PVX_086265 | 0         | 0         | 0         | 0         | 0         | 0         | 0         | 0         | 0         | 0          | 9.7514     | 0          | hypothetical protein, conserved                                                |
| PVX_086268 | 0         | 0         | 0         | 0         | 0         | 0         | 0         | 0         | 0         | 0          | 0          | 0          | hypothetical protein                                                           |
| PVX_086272 | 0         | 0         | 0         | 0         | 0         | 0         | 0         | 0         | 0         | 0          | 20.3886    | 0          | hypothetical protein                                                           |
| PVX_086275 | 0         | 0         | 0         | 0         | 0         | 0         | 0         | 0         | 0         | 0          | 26.4885    | 0          | hypothetical protein, conserved                                                |
| PVX_086280 | 0         | 0         | 0         | 0         | 0         | 0         | 0         | 0         | 0         | 0          | 0          | 0          | hypothetical protein, conserved                                                |
| PVX_086285 | 0         | 0         | 0         | 0         | 0         | 0         | 0         | 0         | 17.9901   | 0          | 18.9026    | 0          | hypothetical protein                                                           |
| PVX_086290 | 0         | 38.1678   | 0         | 0         | 5.77836   | 0         | 25.3111   | 20.7182   | 6.40683   | 14.5151    | 0          | 0          | hypothetical protein, conserved                                                |
| PVX_086295 | 40.7389   | 85.3125   | 0         | 0         | 0         | 0         | 0         | 0         | 77.1717   | 100.203    | 40.5444    | 0          | U2 snRNP-associated SURP motif-containing protein, putative (SR140)            |
| PVX_086305 | 732.643   | 204.845   | 730.7     | 469.601   | 0         | 0         | 899.017   | 814.741   | 777.759   | 926.273    | 670.907    | 475.785    | ubiquitin-40S ribosomal protein S27a, putative                                 |
| PVX_086310 | 0         | 0         | 0         | 0         | 0         | 0         | 0         | 0         | 0         | 0          | 0          | 0          | hypothetical protein, conserved                                                |
| PVX_086315 | 151.957   | 26.5172   | 94.4323   | 0         | 36.1391   | 0         | 116.138   | 52.7516   | 57.5693   | 66.7439    | 136.108    | 0          | 26S proteasome regulatory subunit RPN6, putative (RPN6)                        |
| PVX_086320 | 0         | 0         | 0         | 0         | 0         | 0         | 0         | 0         | 0         | 0          | 0          | 0          | hypothetical protein, conserved                                                |
| PVX_086325 | 0         | 0         | 0         | 0         | 13.1164   | 0         | 0         | 0         | 15.6698   | 43.5991    | 8.23256    | 0          | hypothetical protein, conserved                                                |
| PVX_086330 | 0         | 95.0628   | 169.345   | 0         | 21.6004   | 0         | 104.146   | 94.5471   | 128.966   | 47.8289    | 162.59     | 220.533    | exopolyphosphatase, putative                                                   |
| PVX_086335 | 0         | 0         | 0         | 0         | 0         | 0         | 0         | 0         | 0         | 0          | 13.7056    | 111.542    | hypothetical protein, conserved                                                |
| PVX_086340 | 79.7086   | 111.336   | 0         | 0         | 50.6028   | 0         | 110.728   | 30.2065   | 112.01    | 79.3322    | 0          | 0          | choline kinase, putative                                                       |
| PVX_086345 | 0         | 0         | 0         | 0         | 0         | 0         | 0         | 0         | 0         | 0          | 0          | 0          | hypothetical protein, conserved                                                |
| PVX_086350 | 0         | 0         | 0         | 0         | 0         | 0         | 0         | 0         | 0         | 0          | 0          | 0          | variable surface protein Vir21, putative,PIR protein                           |
| PVX_086845 | 0         | 0         | 0         | 0         | 0         | 0         | 0         | 0         | 0         | 0          | 0          | 0          | VIR protein,PIR protein                                                        |
| PVX_086850 | 0         | 0         | 0         | 0         | 0         | 0         | 0         | 0         | 0         | 0          | 0          | 0          | variable surface protein Vir35, putative,PIR protein                           |
| PVX_086855 | 0         | 54.185    | 0         | 0         | 12.3078   | 0         | 0         | 0         | 0         | 27.2764    | 7.72553    | 0          | variable surface protein Vir24-like,PIR protein                                |

| Gene ID    | Patient 1 | Patient 2 | Patient 3 | Patient 4 | Patient 5 | Patient 6 | Patient 7 | Patient 8 | Patient 9 | Patient 10 | Patient 11 | Patient 12 | Gene Description                                                         |                                                                  |
|------------|-----------|-----------|-----------|-----------|-----------|-----------|-----------|-----------|-----------|------------|------------|------------|--------------------------------------------------------------------------|------------------------------------------------------------------|
| Patient    |           |           |           |           |           |           |           |           |           |            |            |            |                                                                          |                                                                  |
| PVX_086860 | 0         | 0         | 0         | 0         | 0         | 0         | 0         | 0         | 0         | 0          | 0          | 0          | variable surface protein Vir24-related,PIR protein                       |                                                                  |
| PVX_086863 | 0         | 0         | 0         | 0         | 0         | 0         | 0         | 0         | 0         | 0          | 0          | 0          | VIR protein,PIR protein                                                  |                                                                  |
| PVX_086865 | 0         | 0         | 0         | 0         | 0         | 0         | 0         | 0         | 0         | 0          | 0          | 0          | VIR protein,PIR protein                                                  |                                                                  |
| PVX_086870 | 0         | 0         | 0         | 0         | 0         | 0         | 0         | 0         | 0         | 0          | 0          | 0          | VIR protein, pseudogene,PIR protein, pseudogene                          |                                                                  |
| PVX_086875 | 0         | 0         | 0         | 0         | 0         | 0         | 0         | 0         | 0         | 0          | 0          | 0          | variable surface protein Vir27-related,PIR protein                       |                                                                  |
| PVX_086880 | 0         | 0         | 0         | 0         | 0         | 0         | 0         | 0         | 0         | 0          | 0          | 0          | variable surface protein Vir23-like,PIR protein                          |                                                                  |
| PVX_086890 | 112.252   | 0         | 0         | 0         | 0         | 0         | 0         | 51.9573   | 42.5269   | 39.4437    | 29.7909    | 0          | variable surface protein Vir8-like,PIR protein                           |                                                                  |
| PVX_086893 | 0         | 0         | 0         | 0         | 0         | 0         | 0         | 0         | 0         | 0          | 16.5229    | 0          | VIR protein,PIR protein                                                  |                                                                  |
| PVX_086895 | 0         | 0         | 0         | 0         | 0         | 0         | 0         | 0         | 0         | 0          | 0          | 0          | VIR protein,PIR protein                                                  |                                                                  |
| PVX_086900 | 0         | 186.347   | 0         | 0         | 25.393    | 0         | 0         | 37.0719   | 70.8033   | 121.974    | 85.032     | 0          | Plasmodium exported protein, unknown function                            |                                                                  |
| PVX_086903 | 0         | 0         | 0         | 0         | 0         | 0         | 0         | 0         | 0         | 0          | 0          | 0          | Plasmodium exported protein, unknown function                            |                                                                  |
| PVX_086905 | 520.729   | 848.333   | 287.807   | 369.932   | 165.203   | 2072.91   | 265.489   | 723.221   | 635.765   | 569.199    | 437.637    | 93.7007    | Plasmodium exported protein, unknown function                            |                                                                  |
| PVX_086910 | 0         | 0         | 0         | 0         | 0         | 0         | 0         | 111.624   | 0         | 56.4571    | 0          | 0          | Phist protein (Pf-fam-b)                                                 |                                                                  |
| PVX_086915 | 496.141   | 0         | 620.308   | 0         | 79.0701   | 0         | 381.744   | 0         | 94.1181   | 0          | 49.3908    | 0          | early transcribed membrane protein (ETRAMP)                              |                                                                  |
| PVX_086920 | 0         | 0         | 0         | 0         | 0         | 0         | 0         | 0         | 0         | 0          | 0          | 0          | hypothetical protein                                                     |                                                                  |
| PVX_086925 | 59.1591   | 0         | 0         | 0         | 0         | 0         | 0         | 0         | 0         | 0          | 35.3269    | 0          | Plasmodium exported protein, unknown function                            |                                                                  |
| PVX_086930 | 23.374    | 0         | 0         | 0         | 0         | 0         | 0         | 0         | 0         | 0          | 0          | 0          | cytoadherence linked asexual protein (CLAG), putative                    |                                                                  |
| PVX_086935 | 0         | 139.804   | 0         | 0         | 0         | 0         | 0         | 0         | 0         | 0          | 0          | 0          | Plasmodium exported protein, unknown function                            |                                                                  |
| PVX_086940 | 128.686   | 134.728   | 0         | 0         | 20.4002   | 0         | 0         | 44.6706   | 12.1878   | 33.9146    | 51.2282    | 0          | hypothetical protein, conserved                                          |                                                                  |
| PVX_086945 | 0         | 0         | 0         | 0         | 0         | 0         | 0         | 0         | 0         | 0          | 0          | 0          | Plasmodium exported protein, unknown function                            |                                                                  |
| PVX_086950 | 0         | 0         | 0         | 0         | 0         | 0         | 0         | 0         | 0         | 0          | 0          | 0          | gametocyte development protein 1, putative (GDV1)                        |                                                                  |
| PVX_086955 | 0         | 0         | 0         | 0         | 0         | 0         | 0         | 0         | 0         | 384.446    | 109.238    | 0          | phosphatidylinositol N-acetylglucosaminyltransferase subunit P, putative |                                                                  |
| PVX_086960 | 0         | 0         | 0         | 0         | 0         | 0         | 0         | 0         | 12.032    | 11.1605    | 25.2868    | 0          | vacuolar protein sorting-associated protein 33, putative (VPS33)         |                                                                  |
| PVX_086962 | 0         | 0         | 0         | 0         | 0         | 0         | 0         | 0         | 0         | 0          | 458.795    | 0          | conserved protein, unknown function                                      |                                                                  |
| PVX_086965 | 0         | 595.379   | 0         | 0         | 0         | 0         | 732.778   | 0         | 271.065   | 83.6041    | 142.256    | 0          | U2 small nuclear ribonucleoprotein B'', putative                         |                                                                  |
| PVX_086970 | 0         | 0         | 0         | 0         | 0         | 0         | 0         | 0         | 24.7752   | 0          | 0          | 0          | hypothetical protein, conserved                                          |                                                                  |
| PVX_086975 | 0         | 0         | 0         | 0         | 0         | 0         | 0         | 0         | 0         | 0          | 21.6526    | 0          | cAMP-dependent protein kinase catalytic subunit, putative                |                                                                  |
| PVX_086980 | 0         | 191.201   | 0         | 24.3873   | 393.473   | 0         | 106.732   | 58.2334   | 80.9791   | 183.531    | 0          | 0          | hypothetical protein, conserved                                          |                                                                  |
| PVX_086985 | 0         | 0         | 0         | 0         | 0         | 0         | 0         | 0         | 0         | 0          | 86.5431    | 0          | hypothetical protein, conserved                                          |                                                                  |
| PVX_086990 | 212.131   | 296.402   | 0         | 0         | 0         | 0         | 162.479   | 294.76    | 40.202    | 298.055    | 168.909    | 0          | vacuolar ATP synthase subunit e, putative                                |                                                                  |
| PVX_086995 | 195.932   | 0         | 489.212   | 0         | 62.3712   | 0         | 0         | 74.31     | 206.378   | 234.044    | 0          | 0          | transcription factor with AP2 domain(s), putative (ApiAP2)               |                                                                  |
| PVX_087000 | 0         | 0         | 0         | 0         | 0         | 0         | 890.358   | 0         | 219.29    | 0          | 115.052    | 0          | hypothetical protein, conserved                                          |                                                                  |
| PVX_087005 | 0         | 0         | 0         | 114.522   | 0         | 0         | 0         | 0         | 0         | 251.411    | 71.352     | 0          | hypothetical protein, conserved                                          |                                                                  |
| PVX_087010 | 61.2391   | 0         | 0         | 29.123    | 0         | 0         | 85.0299   | 57.9985   | 53.7979   | 79.2297    | 49.5496    | 0          | DNA repair helicase RAD3, putative (RAD3)                                |                                                                  |
| PVX_087015 | 53.9196   | 0         | 0         | 0         | 0         | 0         | 0         | 20.4298   | 0         | 21.4653    | 0          | 0          | histidine-tRNA ligase, putative                                          |                                                                  |
| PVX_087020 | 0         | 0         | 0         | 71.9987   | 0         | 0         | 0         | 0         | 42.9529   | 159.211    | 135.345    | 0          | hypothetical protein, conserved                                          |                                                                  |
| PVX_087025 | 49.615    | 0         | 0         | 0         | 0         | 0         | 137.806   | 37.5966   | 87.1643   | 79.006     | 0          | 0          | delta tubulin, putative                                                  |                                                                  |
| PVX_087030 | 0         | 142.68    | 509.398   | 654.753   | 64.9429   | 0         | 0         | 77.3628   | 71.6119   | 162.432    | 0          | 0          | hypothetical protein, conserved                                          |                                                                  |
| PVX_087035 | 149.062   | 104.097   | 0         | 476.752   | 70.9645   | 0         | 114.057   | 0         | 141.217   | 130.92     | 133.521    | 120.757    | 0                                                                        | mitochondrial-processing peptidase subunit beta, putative (MAS1) |
| PVX_087040 | 0         | 16.8677   | 0         | 0         | 7.6615    | 0         | 0         | 0         | 0         | 25.4799    | 14.4321    | 39.1047    | 0                                                                        | gamma-tubulin complex component, putative                        |
| PVX_087042 | 0         | 0         | 0         | 0         | 0         | 0         | 175.638   | 0         | 173.794   | 0          | 91.2702    | 0          | 0                                                                        | conserved Plasmodium protein, unknown function                   |
| PVX_087044 | 0         | 0         | 0         | 0         | 0         | 0         | 0         | 0         | 28.0696   | 0          | 22.1212    | 0          | 0                                                                        | conserved Plasmodium protein, unknown function                   |
| PVX_087045 | 0         | 0         | 362.963   | 0         | 46.2838   | 0         | 0         | 202.358   | 110.385   | 51.125     | 202.86     | 0          | 0                                                                        | SGS domain containing protein                                    |
| PVX_087050 | 0         | 0         | 0         | 14.3513   | 0         | 0         | 0         | 0         | 17.1439   | 0          | 27.0205    | 0          | 0                                                                        | hypothetical protein, conserved                                  |
| PVX_087055 | 0         | 31.8298   | 0         | 0         | 0         | 0         | 0         | 0         | 34.55     | 0          | 18.1514    | 0          | 0                                                                        | mRNA processing protein, putative                                |
| PVX_087060 | 0         | 0         | 0         | 0         | 0         | 0         | 0         | 0         | 0         | 0          | 0          | 0          | 0                                                                        | hypothetical protein, conserved                                  |
| PVX_087065 | 90.4487   | 47.3417   | 112.368   | 0         | 50.1732   | 0         | 34.5471   | 31.3943   | 102.789   | 23.8384    | 103.517    | 0          | 0                                                                        | hypothetical protein, conserved                                  |
| PVX_087070 | 32.8084   | 45.7987   | 0         | 0         | 0         | 0         | 0         | 0         | 24.8583   | 11.5286    | 13.0606    | 0          | 0                                                                        | hypothetical protein, conserved                                  |
| PVX_087075 | 0         | 0         | 0         | 0         | 53.8429   | 0         | 0         | 0         | 0         | 59.4332    | 134.778    | 274.961    | 0                                                                        | 30S ribosomal protein S6, putative (RPS6)                        |
| PVX_087080 | 0         | 0         | 0         | 208.15    | 0         | 0         | 0         | 0         | 0         | 0          | 12.9578    | 0          | 0                                                                        | palmitoyltransferase, putative (DHHG6)                           |
| PVX_087085 | 0         | 54.9333   | 0         | 0         | 24.9672   | 0         | 0         | 0         | 29.808    | 27.6333    | 31.3145    | 0          | 0                                                                        | peptide release factor, putative                                 |
| PVX_087090 | 61.2232   | 42.7477   | 152.286   | 0         | 58.2746   | 0         | 374.61    | 85.0334   | 208.785   | 64.5308    | 97.4921    | 0          | 0                                                                        | M18 aspartyl aminopeptidase, putative (M18AAP)                   |
| PVX_087095 | 246.281   | 86.0488   | 920.499   | 394.387   | 78.2589   | 0         | 566.218   | 513.405   | 326.757   | 302.757    | 294.159    | 399.58     | 0                                                                        | profilin, putative (PFN)                                         |
| PVX_087105 | 0         | 0         | 0         | 0         | 0         | 0         | 0         | 36.8739   | 20.1214   | 0          | 15.8583    | 0          | 0                                                                        | protein MAM3, putative                                           |
| PVX_087107 | 0         | 0         | 0         | 0         | 0         | 0         | 0         | 0         | 0         | 0          | 159.945    | 0          | 0                                                                        | conserved Plasmodium protein, unknown function                   |
| PVX_087110 | 0         | 0         | 0         | 0         | 0         | 0         | 0         | 0         | 0         | 0          | 29.2177    | 0          | 0                                                                        | adenylate kinase-like protein 2, putative (AKLP2)                |
| PVX_087115 | 345.282   | 241.163   | 0         | 276.175   | 0         | 0         | 264.299   | 119.921   | 65.4273   | 272.918    | 103.096    | 139.906    | 0                                                                        | proteasome subunit beta type-6, putative                         |
| PVX_087120 | 48.8033   | 34.0704   | 242.701   | 0         | 15.4796   | 0         | 0         | 0         | 18.4906   | 17.1477    | 58.285     | 79.0156    | 0                                                                        | hypothetical protein, conserved                                  |
| PVX_087125 | 0         | 0         | 0         | 0         | 0         | 0         | 0         | 0         | 0         | 0          | 0          | 0          | 0                                                                        | conserved protein, unknown function                              |
| PVX_087130 | 150.313   | 0         | 0         | 0         | 23.8539   | 0         | 0         | 0         | 56.9612   | 105.615    | 14.9603    | 0          | 0                                                                        | hypothetical protein, conserved                                  |
| PVX_087135 | 146.74    | 102.474   | 182.562   | 0         | 46.5714   | 0         | 112.277   | 305.749   | 55.6063   | 206.211    | 233.673    | 0          | 0                                                                        | hypothetical protein, conserved                                  |
| PVX_087140 | 214.826   | 0         | 0         | 229.011   | 22.7258   | 0         | 109.575   | 0         | 108.542   | 25.1578    | 71.2697    | 0          | 0                                                                        | hypothetical protein                                             |

| Gene ID    | Patient 1 | Patient 2 | Patient 3 | Patient 4 | Patient 5 | Patient 6 | Patient 7 | Patient 8 | Patient 9 | Patient 10 | Patient 11 | Patient 12 | Gene Description                                                      |
|------------|-----------|-----------|-----------|-----------|-----------|-----------|-----------|-----------|-----------|------------|------------|------------|-----------------------------------------------------------------------|
| Patient    |           |           |           |           |           |           |           |           |           |            |            |            |                                                                       |
| PVX_087143 | 181.618   | 0         | 0         | 0         | 0         | 0         | 836.665   | 0         | 68.8743   | 127.543    | 180.784    | 0          | selenoprotein, putative (Sel2)                                        |
| PVX_087145 | 36.2357   | 25.2926   | 0         | 0         | 11.4898   | 0         | 110.771   | 150.947   | 82.3671   | 25.4655    | 79.3376    | 0          | nucleolar protein Nop52, putative                                     |
| PVX_087150 | 116.262   | 81.2347   | 0         | 0         | 0         | 0         | 0         | 0         | 0         | 40.8364    | 0          | 0          | hypothetical protein, conserved                                       |
| PVX_087155 | 0         | 0         | 0         | 0         | 12.3453   | 0         | 0         | 0         | 14.7493   | 13.6797    | 46.4944    | 0          | elongation factor Tu, putative                                        |
| PVX_087160 | 0         | 0         | 0         | 0         | 0         | 0         | 124.446   | 0         | 0         | 0          | 32.3672    | 0          | NFU-like protein, putative                                            |
| PVX_087165 | 0         | 0         | 0         | 0         | 0         | 0         | 0         | 0         | 0         | 0          | 0          | 0          | hypothetical protein                                                  |
| PVX_087665 | 92.1778   | 257.394   | 0         | 0         | 14.6176   | 707.419   | 70.4677   | 128.007   | 122.233   | 97.1651    | 91.7384    | 0          | hypothetical protein                                                  |
| PVX_087670 | 316.579   | 497.463   | 0         | 0         | 0         | 810.665   | 0         | 109.944   | 149.963   | 194.63     | 63.0167    | 0          | hypothetical protein, conserved                                       |
| PVX_087675 | 253.028   | 574.197   | 157.354   | 202.254   | 60.2136   | 0         | 96.77     | 87.8601   | 143.816   | 200.022    | 100.731    | 102.459    | hypothetical protein, conserved                                       |
| PVX_087680 | 0         | 0         | 0         | 0         | 0         | 0         | 0         | 0         | 0         | 0          | 0          | 0          | chitinase (CHT1)                                                      |
| PVX_087682 | 0         | 0         | 0         | 0         | 0         | 0         | 0         | 0         | 0         | 0          | 0          | 0          | tRNA Alanine                                                          |
| PVX_087684 | 0         | 0         | 0         | 0         | 0         | 0         | 0         | 0         | 0         | 0          | 0          | 0          | tRNA Tyrosine                                                         |
| PVX_087685 | 243.905   | 56.7817   | 0         | 0         | 0         | 0         | 124.446   | 0         | 30.8105   | 57.1236    | 97.1015    | 0          | centrin, putative                                                     |
| PVX_087690 | 0         | 0         | 0         | 0         | 0         | 0         | 0         | 0         | 6.40134   | 0          | 16.8179    | 0          | hypothetical protein, conserved                                       |
| PVX_087695 | 0         | 187.722   | 0         | 0         | 0         | 0         | 0         | 0         | 0         | 0          | 0          | 0          | hypothetical protein, conserved                                       |
| PVX_087700 | 0         | 16.5196   | 0         | 75.5993   | 7.50335   | 0         | 0         | 0         | 0         | 0          | 23.5572    | 0          | hypothetical protein, conserved                                       |
| PVX_087705 | 0         | 0         | 0         | 0         | 0         | 0         | 0         | 545.123   | 0         | 137.222    | 77.9049    | 0          | hypothetical protein, conserved                                       |
| PVX_087710 | 48.1469   | 67.2237   | 239.432   | 0         | 15.2711   | 0         | 0         | 0         | 0         | 84.5857    | 28.7505    | 0          | hypothetical protein, conserved                                       |
| PVX_087715 | 0         | 0         | 0         | 0         | 0         | 0         | 0         | 0         | 4.99489   | 0          | 5.24922    | 0          | hypothetical protein, conserved                                       |
| PVX_087720 | 0         | 0         | 0         | 0         | 0         | 0         | 0         | 0         | 0         | 0          | 0          | 0          | hypothetical protein, conserved                                       |
| PVX_087725 | 238.408   | 83.2937   | 296.991   | 0         | 0         | 611.228   | 0         | 0         | 45.186    | 0          | 0          | 0          | hypothetical protein, conserved                                       |
| PVX_087730 | 0         | 0         | 0         | 0         | 0         | 0         | 0         | 36.3665   | 9.9223    | 0          | 5.2134     | 0          | hypothetical protein, conserved                                       |
| PVX_087735 | 15.0387   | 5.24659   | 37.3506   | 24.0043   | 0         | 0         | 20.8764   | 19.9369   | 29.0683   | 11.973     | 12.1602    | 0          | hypothetical protein, conserved                                       |
| PVX_087740 | 0         | 6.61583   | 23.5499   | 0         | 0         | 48.4573   | 0         | 21.5483   | 6.66422   | 13.2102    | 0          | 0          | hypothetical protein, conserved                                       |
| PVX_087745 | 0         | 0         | 0         | 0         | 0         | 0         | 0         | 0         | 3.10228   | 0          | 3.26034    | 0          | hypothetical protein, conserved                                       |
| PVX_087750 | 0         | 19.8428   | 0         | 0         | 0         | 145.385   | 0         | 39.4752   | 10.7704   | 29.9718    | 39.6126    | 0          | hypothetical protein, conserved                                       |
| PVX_087755 | 0         | 0         | 0         | 0         | 0         | 0         | 21.3778   | 11.6659   | 0         | 12.2597    | 0          | 0          | hypothetical protein, conserved                                       |
| PVX_087760 | 0         | 49.6007   | 0         | 0         | 22.5322   | 0         | 0         | 13.4607   | 12.4851   | 35.3609    | 0          | 0          | WD domain, G-beta repeat domain containing protein                    |
| PVX_087765 | 25.1899   | 0         | 0         | 0         | 7.98518   | 0         | 0         | 0         | 0         | 0          | 0          | 0          | calcium-dependent protein kinase 3, putative                          |
| PVX_087775 | 7.93751   | 11.0768   | 0         | 0         | 5.03025   | 0         | 12.1213   | 0         | 3.00653   | 11.1581    | 22.118     | 12.8366    | E3 ubiquitin-protein ligase, putative                                 |
| PVX_087780 | 0         | 0         | 0         | 0         | 0         | 0         | 0         | 33.0217   | 9.00976   | 16.7158    | 9.46798    | 0          | phosphopantetheine adenyltransferase, putative (PPAT)                 |
| PVX_087785 | 0         | 0         | 0         | 0         | 0         | 0         | 0         | 34.4216   | 9.3917    | 0          | 4.93465    | 0          | hypothetical protein, conserved                                       |
| PVX_087790 | 111.622   | 0         | 0         | 0         | 35.4591   | 0         | 171.021   | 155.109   | 0         | 39.2074    | 66.6595    | 0          | peptide chain release factor, putative                                |
| PVX_087795 | 52.2932   | 18.248    | 0         | 0         | 8.28866   | 133.695   | 0         | 36.3027   | 29.7147   | 27.564     | 15.6128    | 42.306     | methyltransferase, putative                                           |
| PVX_087800 | 0         | 0         | 0         | 0         | 0         | 0         | 0         | 55.9596   | 0         | 14.1601    | 8.02124    | 0          | hypothetical protein, conserved                                       |
| PVX_087802 | 22.0821   | 0         | 0         | 0         | 0         | 0         | 0         | 0         | 33.4598   | 0          | 26.3714    | 0          | hypothetical protein, conserved                                       |
| PVX_087805 | 0         | 0         | 0         | 0         | 0         | 0         | 0         | 52.088    | 0         | 13.1809    | 22.3994    | 0          | origin recognition complex subunit 2, putative (ORC2)                 |
| PVX_087810 | 32.1023   | 0         | 0         | 0         | 0         | 0         | 89.1489   | 24.3231   | 22.5611   | 63.8974    | 0          | 0          | DNA replication licensing factor MCM7, putative (MCM7)                |
| PVX_087815 | 11.101    | 0         | 27.5736   | 0         | 0         | 56.7369   | 0         | 4.20486   | 7.80245   | 6.62854    | 17.9541    | 0          | inositol-phosphate phosphatase, putative                              |
| PVX_087820 | 30.3084   | 0         | 75.3233   | 0         | 9.60897   | 0         | 0         | 0         | 57.4092   | 53.2514    | 36.196     | 0          | RNA helicase, putative                                                |
| PVX_087825 | 0         | 7639.78   | 0         | 0         | 0         | 0         | 0         | 0         | 2027.45   | 5400.69    | 5218.13    | 0          | 40S ribosomal protein S29, putative                                   |
| PVX_087830 | 0         | 0         | 0         | 0         | 0         | 0         | 0         | 0         | 0         | 0          | 0          | 0          | cysteine-rich secretory protein, putative                             |
| PVX_087835 | 409.695   | 0         | 255.063   | 0         | 195.179   | 0         | 156.882   | 0         | 232.924   | 143.913    | 387.383    | 332.161    | ATP synthase lipid-binding protein, mitochondrial precursor, putative |
| PVX_087840 | 56.1585   | 78.38     | 93.0142   | 0         | 41.532    | 95.6969   | 28.5963   | 77.9666   | 99.274    | 52.6268    | 89.4221    | 30.2824    | importin-7, putative                                                  |
| PVX_087845 | 0         | 0         | 101.861   | 0         | 6.49741   | 0         | 31.3164   | 56.9196   | 23.2955   | 14.4072    | 24.4807    | 0          | hypothetical protein, conserved                                       |
| PVX_087851 | 0         | 0         | 0         | 0         | 0         | 0         | 0         | 864.1     | 0         | 0          | 123.255    | 0          | hypothetical protein                                                  |
| PVX_087855 | 0         | 0         | 0         | 0         | 0         | 0         | 0         | 0         | 118.874   | 0          | 0          | 0          | hypothetical protein                                                  |
| PVX_087860 | 2173.59   | 2305.58   | 0         | 0         | 353.3     | 0         | 1715.96   | 1524.13   | 414.595   | 2659.75    | 2382.69    | 1810.04    | 60S ribosomal protein L37, putative                                   |
| PVX_087865 | 0         | 0         | 74.5056   | 0         | 0         | 0         | 0         | 41.6377   | 22.7218   | 5.27       | 0          | 0          | hypothetical protein, conserved                                       |
| PVX_087870 | 0         | 0         | 279.834   | 0         | 0         | 0         | 0         | 0         | 21.3163   | 0          | 33.5946    | 0          | hypothetical protein, conserved                                       |
| PVX_087875 | 0         | 0         | 0         | 0         | 0         | 0         | 0         | 0         | 0         | 0          | 0          | 0          | DNA mismatch repair enzyme, putative                                  |
| PVX_087876 | 0         | 0         | 0         | 0         | 0         | 0         | 0         | 0         | 0         | 0          | 0          | 0          | tRNA Threonine                                                        |
| PVX_087877 | 0         | 0         | 0         | 0         | 0         | 0         | 0         | 0         | 0         | 0          | 0          | 0          | tRNA Histidine                                                        |
| PVX_087878 | 0         | 0         | 0         | 0         | 0         | 0         | 0         | 0         | 0         | 0          | 0          | 0          | tRNA Lysine                                                           |
| PVX_087879 | 0         | 0         | 0         | 0         | 0         | 0         | 0         | 0         | 0         | 0          | 0          | 0          | tRNA Lysine                                                           |
| PVX_087880 | 0         | 0         | 36.9125   | 0         | 9.41835   | 0         | 0         | 0         | 5.62856   | 5.22188    | 26.618     | 0          | hypothetical protein, conserved                                       |
| PVX_087885 | 0         | 0         | 0         | 0         | 0         | 0         | 0         | 0         | 0         | 15.8036    | 0          | 0          | rho-pry-associated membrane antigen, putative                         |
| PVX_087895 | 0         | 34.8112   | 0         | 159.371   | 31.6327   | 0         | 0         | 0         | 37.7852   | 35.0405    | 109.178    | 80.735     | AAA family ATPase, putative                                           |
| PVX_087900 | 0         | 14.6237   | 0         | 0         | 0         | 0         | 0         | 29.093    | 7.93791   | 0          | 8.34175    | 0          | hypothetical protein, conserved                                       |
| PVX_087905 | 0         | 0         | 0         | 0         | 36.6983   | 0         | 0         | 160.52    | 0         | 0          | 114.971    | 0          | hypothetical protein, conserved                                       |
| PVX_087910 | 86.7813   | 0         | 71.8876   | 0         | 0         | 0         | 0         | 0         | 10.9584   | 40.6598    | 28.7886    | 0          | E3 ubiquitin-protein ligase, putative                                 |
| PVX_087915 | 30.1858   | 0         | 75.0182   | 96.4244   | 19.1401   | 0         | 0         | 0         | 34.306    | 21.2144    | 42.0577    | 0          | RAP protein, putative                                                 |

| Gene ID    | Patient | Patient 1 | Patient 2 | Patient 3 | Patient 4 | Patient 5 | Patient 6 | Patient 7 | Patient 8 | Patient 9 | Patient 10 | Patient 11 | Patient 12 | Gene Description                                                                                     |
|------------|---------|-----------|-----------|-----------|-----------|-----------|-----------|-----------|-----------|-----------|------------|------------|------------|------------------------------------------------------------------------------------------------------|
| PVX_087920 |         | 310.333   | 108.473   | 0         | 0         | 49.3448   | 0         | 238.069   | 431.422   | 411.828   | 326.945    | 401.568    | 0          | ribosomal protein S8e, putative                                                                      |
| PVX_087925 |         | 40.7946   | 0         | 0         | 0         | 0         | 0         | 0         | 0         | 0         | 0          | 24.3599    | 0          | cytoskeleton associated protein, putative                                                            |
| PVX_087930 |         | 0         | 90.4097   | 0         | 0         | 123.347   | 0         | 0         | 179.805   | 49.0434   | 90.8759    | 77.2612    | 0          | hypothetical protein                                                                                 |
| PVX_087935 |         | 0         | 1899.75   | 0         | 0         | 0         | 0         | 0         | 0         | 0         | 0          | 528.213    | 0          | DNA-directed RNA polymerase II 8.2 kDa polypeptide, putative                                         |
| PVX_087940 |         | 0         | 0         | 0         | 0         | 0         | 0         | 0         | 0         | 0         | 11.6698    | 6.61027    | 0          | hypothetical protein, conserved                                                                      |
| PVX_087945 |         | 169.214   | 59.0925   | 0         | 0         | 26.8594   | 433.377   | 129.519   | 117.538   | 96.1913   | 118.89     | 50.5247    | 0          | EKC/KEOPS complex subunit BUD32, putative (BUD32)                                                    |
| PVX_087950 |         | 1853.56   | 1807.04   | 584.941   | 657.87    | 541.002   | 2256.84   | 1079.05   | 2205.96   | 1683.02   | 1736.9     | 1587.02    | 714.142    | heat shock protein 86, putative                                                                      |
| PVX_087955 |         | 0         | 39.7741   | 70.811    | 0         | 18.0668   | 0         | 0         | 39.5632   | 32.3832   | 80.1029    | 28.3577    | 0          | O1, putative                                                                                         |
| PVX_087960 |         | 0         | 0         | 0         | 0         | 0         | 0         | 0         | 0         | 0         | 0          | 26.1055    | 0          | inner membrane complex protein 1d, putative (IMC1d)                                                  |
| PVX_087965 |         | 0         | 0         | 0         | 0         | 60.1284   | 0         | 0         | 0         | 47.8709   | 44.3866    | 138.31     | 102.314    | cloroquine resistance associated protein Cg8, putative                                               |
| PVX_087970 |         | 436.419   | 456.933   | 271.196   | 116.194   | 46.1275   | 186.018   | 111.176   | 101       | 427.12    | 460.054    | 332.989    | 176.586    | heat shock protein 110, putative (HSP110c)                                                           |
| PVX_087975 |         | 0         | 0         | 0         | 380.212   | 37.7237   | 0         | 0         | 164.998   | 0         | 83.4054    | 0          | 192.609    | cloroquine resistance associated protein Cg3, putative,SCO1 protein homolog, mitochondrial, putative |
| PVX_087980 |         | 0         | 105.374   | 0         | 0         | 0         | 0         | 0         | 139.744   | 57.1878   | 123.745    | 10.0146    | 0          | chloroquine resistance transporter, putative (CRT)                                                   |
| PVX_087985 |         | 59.1153   | 0         | 0         | 0         | 18.7415   | 0         | 0         | 82.0803   | 44.7894   | 20.773     | 17.6497    | 47.8298    | cloroquine resistance associated protein cg1, putative                                               |
| PVX_087990 |         | 0         | 0         | 0         | 0         | 0         | 0         | 0         | 0         | 0         | 39.3546    | 22.3033    | 0          | glutaredoxin-like protein                                                                            |
| PVX_087995 |         | 12.5539   | 26.2799   | 0         | 0         | 11.935    | 0         | 0         | 17.4278   | 9.51047   | 13.2353    | 17.4909    | 0          | cloroquine resistance associated protein Cg2, putative                                               |
| PVX_088000 |         | 21.2788   | 0         | 52.8692   | 67.9553   | 20.2342   | 0         | 0         | 29.5427   | 8.06061   | 22.4329    | 33.8827    | 68.8501    | cloroquine resistance associated protein Cg7, putative                                               |
| PVX_088005 |         | 0         | 0         | 0         | 0         | 0         | 0         | 0         | 0         | 0         | 127.231    | 72.2199    | 0          | hypothetical protein, conserved                                                                      |
| PVX_088007 |         | 0         | 57.8732   | 0         | 0         | 8.76258   | 0         | 0         | 38.3776   | 52.3548   | 38.8517    | 27.5081    | 44.7252    | ribonucleases P/MRP protein subunit POP1, putative (POP1)                                            |
| PVX_088010 |         | 0         | 30.3006   | 0         | 138.707   | 13.766    | 0         | 66.3606   | 0         | 65.781    | 45.7556    | 34.5595    | 0          | lysophospholipase, putative                                                                          |
| PVX_088015 |         | 0         | 65.6818   | 0         | 0         | 0         | 0         | 0         | 130.641   | 0         | 132.125    | 18.7175    | 0          | lysophospholipase, putative                                                                          |
| PVX_088020 |         | 0         | 0         | 0         | 0         | 0         | 0         | 0         | 0         | 0         | 0          | 111.247    | 0          | hypothetical protein, conserved                                                                      |
| PVX_088025 |         | 0         | 0         | 0         | 42.4213   | 4.21053   | 0         | 0         | 0         | 0         | 4.66917    | 7.93345    | 0          | hypothetical protein, conserved                                                                      |
| PVX_088035 |         | 29.6704   | 0         | 24.5651   | 0         | 0         | 0         | 0         | 0         | 3.74618   | 0          | 5.90552    | 0          | hypothetical protein, conserved                                                                      |
| PVX_088040 |         | 59.5925   | 0         | 0         | 0         | 0         | 0         | 0         | 0         | 22.5801   | 20.9375    | 59.3095    | 0          | hypothetical protein, conserved                                                                      |
| PVX_088045 |         | 0         | 0         | 0         | 0         | 0         | 0         | 0         | 0         | 0         | 0          | 2.93659    | 0          | hypothetical protein, conserved                                                                      |
| PVX_088050 |         | 105.815   | 147.85    | 0         | 0         | 0         | 0         | 0         | 0         | 80.2136   | 0          | 84.2548    | 0          | hypothetical protein, conserved                                                                      |
| PVX_088055 |         | 66.5499   | 0         | 0         | 0         | 0         | 0         | 203.636   | 0         | 50.4351   | 0          | 39.7407    | 0          | DNA repair protein, putative                                                                         |
| PVX_088060 |         | 0         | 0         | 235.843   | 0         | 0         | 0         | 0         | 131.61    | 71.8027   | 0          | 75.4247    | 153.566    | hypothetical protein, conserved                                                                      |
| PVX_088065 |         | 651.053   | 454.859   | 540.526   | 1042.14   | 206.806   | 1112.42   | 1163.65   | 301.557   | 370.159   | 343.032    | 583.202    | 703.911    | 60S ribosomal protein L34, putative (RPL34)                                                          |
| PVX_088070 |         | 110.382   | 0         | 549.888   | 0         | 70.1288   | 0         | 0         | 153.385   | 41.8395   | 193.862    | 65.9194    | 0          | hypothetical protein, conserved                                                                      |
| PVX_088075 |         | 173.815   | 60.7011   | 0         | 0         | 27.5913   | 0         | 133.05    | 120.737   | 32.9361   | 0          | 17.2995    | 0          | hypothetical protein, conserved                                                                      |
| PVX_088080 |         | 130.124   | 0         | 0         | 0         | 0         | 0         | 0         | 0         | 0         | 0          | 155.421    | 0          | 50S ribosomal protein L1, mitochondrial, putative (RPL1)                                             |
| PVX_088085 |         | 0         | 20.3671   | 0         | 0         | 9.25152   | 0         | 0         | 40.5181   | 44.2197   | 20.5089    | 5.80841    | 0          | cell division cycle ATPase, putative                                                                 |
| PVX_088090 |         | 0         | 0         | 647.416   | 0         | 0         | 0         | 360.194   | 98.2085   | 90.8487   | 90.8487    | 206.137    | 421.556    | hypothetical protein, conserved                                                                      |
| PVX_088095 |         | 0         | 0         | 0         | 0         | 11.8649   | 0         | 57.1937   | 0         | 0         | 0          | 7.44773    | 0          | hypothetical protein, conserved                                                                      |
| PVX_088100 |         | 0         | 0         | 0         | 0         | 32.4553   | 0         | 0         | 141.989   | 38.732    | 71.7923    | 0          | 0          | hypothetical protein, conserved                                                                      |
| PVX_088105 |         | 0         | 0         | 315.023   | 269.943   | 26.7905   | 0         | 64.573    | 58.6547   | 64.0108   | 0          | 67.2594    | 136.749    | hypothetical protein, conserved                                                                      |
| PVX_088110 |         | 0         | 33.6299   | 0         | 0         | 0         | 0         | 0         | 73.0068   | 0         | 67.705     | 67.1207    | 0          | regulator of chromosome condensation, putative                                                       |
| PVX_088115 |         | 267.241   | 186.769   | 0         | 0         | 0         | 0         | 409.741   | 371.438   | 253.279   | 469.295    | 372.397    | 0          | coatomer epsilon subunit, putative                                                                   |
| PVX_088120 |         | 52.6198   | 36.7365   | 0         | 168.193   | 83.4583   | 0         | 0         | 73.0779   | 39.8743   | 18.4883    | 94.2649    | 0          | NSFL1 cofactor p47, putative                                                                         |
| PVX_088125 |         | 0         | 0         | 0         | 0         | 0         | 0         | 0         | 0         | 0         | 0          | 0          | 0          | aspartyl protease, putative                                                                          |
| PVX_088130 |         | 44.023    | 0         | 0         | 70.2967   | 13.9542   | 0         | 0         | 0         | 33.3528   | 7.73509    | 30.6683    | 0          | AP-3 complex subunit delta, putative                                                                 |
| PVX_088140 |         | 0         | 0         | 0         | 0         | 17.9581   | 0         | 0         | 0         | 53.6475   | 69.6686    | 56.3744    | 0          | hypothetical protein, conserved                                                                      |
| PVX_088145 |         | 285.691   | 0         | 0         | 0         | 30.2399   | 0         | 145.831   | 0         | 108.277   | 301.074    | 189.565    | 154.385    | tyrosine-tRNA ligase, putative                                                                       |
| PVX_088150 |         | 271.891   | 0         | 135.234   | 347.645   | 17.2502   | 0         | 0         | 0         | 123.622   | 114.636    | 151.535    | 0          | 26S proteasome regulatory subunit RPN10, putative (RPN10)                                            |
| PVX_088155 |         | 0         | 0         | 0         | 0         | 0         | 0         | 0         | 0         | 0         | 0          | 12.6839    | 0          | serine protease DegP, putative (DegP)                                                                |
| PVX_088165 |         | 0         | 62.8365   | 0         | 71.889    | 14.2703   | 115.086   | 34.3906   | 62.5043   | 0         | 47.461     | 44.8036    | 0          | hypothetical protein, conserved                                                                      |
| PVX_088170 |         | 0         | 0         | 384.97    | 0         | 0         | 0         | 236.831   | 214.593   | 117.056   | 216.836    | 215.11     | 250.668    | proteasome subunit alpha type-6, putative                                                            |
| PVX_088175 |         | 0         | 68.8695   | 0         | 631.062   | 93.9254   | 0         | 150.988   | 136.979   | 186.828   | 0          | 176.624    | 0          | hypothetical protein, conserved                                                                      |
| PVX_088180 |         | 0         | 466.408   | 0         | 0         | 141.559   | 0         | 0         | 618.212   | 84.2884   | 156.011    | 309.672    | 0          | ras-related protein Rab-18, putative (RAB18)                                                         |
| PVX_088185 |         | 62.5934   | 43.7052   | 0         | 0         | 0         | 0         | 191.505   | 86.9377   | 118.589   | 65.9747    | 62.2964    | 0          | hypothetical protein, conserved                                                                      |
| PVX_088190 |         | 49.7496   | 17.3601   | 0         | 0         | 7.88524   | 0         | 0         | 0         | 9.42304   | 17.4823    | 9.90221    | 0          | helicase, putative                                                                                   |
| PVX_088195 |         | 0         | 0         | 0         | 0         | 38.5968   | 0         | 186.168   | 0         | 0         | 85.3287    | 48.3609    | 0          | hypothetical protein, conserved                                                                      |
| PVX_088200 |         | 0         | 91.9141   | 0         | 210.45    | 20.8844   | 0         | 0         | 0         | 74.8177   | 23.1233    | 26.2015    | 0          | hypothetical protein, conserved                                                                      |
| PVX_088205 |         | 32.5934   | 90.9967   | 0         | 0         | 0         | 0         | 0         | 90.513    | 98.781    | 68.7184    | 123.262    | 52.7466    | vacuolar proton translocating ATPase subunit A, putative                                             |
| PVX_088210 |         | 0         | 0         | 0         | 0         | 0         | 0         | 0         | 0         | 28.1729   | 0          | 59.1948    | 0          | protein tyrosine phosphatase, putative (PTP2)                                                        |
| PVX_088215 |         | 0         | 31.0192   | 0         | 0         | 4.69592   | 0         | 22.6325   | 0         | 22.4509   | 31.2431    | 35.3908    | 23.9674    | hypothetical protein, conserved                                                                      |
| PVX_088220 |         | 0         | 28.6331   | 101.972   | 0         | 13.008    | 0         | 0         | 113.921   | 46.6214   | 43.2394    | 57.1525    | 0          | kinesin, putative                                                                                    |
| PVX_088225 |         | 0         | 53.6496   | 95.5283   | 0         | 24.3723   | 0         | 0         | 53.3634   | 29.1185   | 67.5176    | 45.8954    | 0          | DnaJ domain containing protein                                                                       |
| PVX_088230 |         | 0         | 0         | 0         | 0         | 0         | 0         | 0         | 0         | 94.9087   | 0          | 0          | 0          | glycosyltransferase, putative                                                                        |
| PVX_088235 |         | 18.3097   | 0         | 0         | 58.4684   | 17.4096   | 0         | 0         | 0         | 0         | 19.3031    | 32.7992    | 0          | ferlin, putative                                                                                     |

| Gene ID    | Patient | Patient 1 | Patient 2 | Patient 3 | Patient 4 | Patient 5 | Patient 6 | Patient 7 | Patient 8 | Patient 9 | Patient 10 | Patient 11 | Patient 12 | Gene Description                                             |
|------------|---------|-----------|-----------|-----------|-----------|-----------|-----------|-----------|-----------|-----------|------------|------------|------------|--------------------------------------------------------------|
| PVX_088240 |         | 0         | 0         | 0         | 0         | 0         | 0         | 0         | 0         | 0         | 0          | 20.2089    | 0          | hypothetical protein, conserved                              |
| PVX_088245 |         | 0         | 0         | 0         | 0         | 0         | 0         | 0         | 0         | 0         | 48.605     | 0          | 0          | hypothetical protein, conserved                              |
| PVX_088250 |         | 0         | 0         | 160.958   | 0         | 0         | 0         | 0         | 44.9616   | 12.2672   | 22.757     | 12.8905    | 0          | AAA family ATPase, putative                                  |
| PVX_088254 |         | 74.5308   | 52.0484   | 0         | 0         | 0         | 0         | 0         | 103.53    | 84.7299   | 26.1841    | 14.8357    | 0          | hypothetical protein, conserved                              |
| PVX_088256 |         | 0         | 0         | 0         | 0         | 0         | 0         | 0         | 0         | 0         | 0          | 0          | 0          | hypothetical protein, conserved                              |
| PVX_088265 |         | 43.6473   | 0         | 0         | 0         | 0         | 0         | 0         | 0         | 0         | 0          | 21.7189    | 0          | serine/threonine protein kinase, FIKK family                 |
| PVX_088270 |         | 136.865   | 47.786    | 0         | 218.835   | 43.4323   | 0         | 0         | 0         | 0         | 96.1697    | 13.6217    | 0          | PAP2-like protein, putative                                  |
| PVX_088275 |         | 0         | 19.2198   | 0         | 0         | 0         | 0         | 0         | 38.2358   | 10.4323   | 9.67707    | 5.48131    | 0          | hypothetical protein, conserved                              |
| PVX_088280 |         | 0         | 0         | 0         | 0         | 0         | 0         | 0         | 197.846   | 53.9622   | 99.9749    | 28.3347    | 0          | hypothetical protein, conserved                              |
| PVX_088775 |         | 0         | 0         | 0         | 0         | 0         | 0         | 0         | 0         | 0         | 0          | 0          | 0          | VIR protein, PIR protein                                     |
| PVX_088780 |         | 0         | 0         | 0         | 0         | 0         | 0         | 0         | 0         | 0         | 0          | 27.9927    | 0          | variable surface protein Vir24-related, PIR protein          |
| PVX_088790 |         | 0         | 0         | 0         | 0         | 0         | 0         | 0         | 0         | 0         | 0          | 0          | 65.764     | variable surface protein Vir21-like, PIR protein             |
| PVX_088795 |         | 0         | 0         | 0         | 0         | 0         | 0         | 0         | 0         | 29.574    | 27.4166    | 0          | 0          | VIR protein, PIR protein                                     |
| PVX_088797 |         | 0         | 0         | 0         | 0         | 0         | 0         | 0         | 0         | 0         | 0          | 0          | 0          | VIR protein, PIR protein                                     |
| PVX_088798 |         | 0         | 0         | 0         | 0         | 0         | 0         | 0         | 0         | 0         | 0          | 0          | 0          | VIR protein, PIR protein                                     |
| PVX_088800 |         | 0         | 0         | 0         | 0         | 0         | 0         | 0         | 0         | 0         | 0          | 0          | 0          | variable surface protein Vir4-related, PIR protein           |
| PVX_088805 |         | 0         | 0         | 0         | 0         | 0         | 0         | 0         | 0         | 0         | 0          | 0          | 0          | variable surface protein Vir22/24-like, PIR protein          |
| PVX_088810 |         | 0         | 0         | 0         | 0         | 0         | 0         | 0         | 0         | 0         | 0          | 0          | 0          | tryptophan-rich antigen (Pv-fam-a)                           |
| PVX_088815 |         | 96.775    | 135.204   | 0         | 0         | 0         | 0         | 0         | 0         | 0         | 33.9951    | 19.264     | 0          | PST-A protein                                                |
| PVX_088820 |         | 92.4751   | 129.189   | 0         | 0         | 0         | 0         | 283.198   | 0         | 35.0476   | 64.9705    | 55.2239    | 0          | tryptophan-rich antigen (Pv-fam-a)                           |
| PVX_088825 |         | 0         | 0         | 0         | 0         | 0         | 0         | 0         | 0         | 0         | 0          | 0          | 0          | tryptophan-rich antigen (Pv-fam-a)                           |
| PVX_088830 |         | 143.132   | 599.526   | 0         | 0         | 75.6629   | 488.231   | 0         | 265.027   | 271.147   | 335.277    | 189.933    | 77.244     | Phist protein (Pf-fam-b)                                     |
| PVX_088835 |         | 0         | 0         | 0         | 0         | 0         | 0         | 0         | 0         | 0         | 160.797    | 0          | 0          | hypothetical protein, conserved                              |
| PVX_088840 |         | 0         | 0         | 0         | 0         | 0         | 0         | 0         | 0         | 68.6551   | 63.6601    | 84.1541    | 0          | Phist protein (Pf-fam-b)                                     |
| PVX_088845 |         | 0         | 0         | 0         | 0         | 0         | 0         | 0         | 0         | 0         | 0          | 0          | 0          | Plasmodium exported protein, unknown function                |
| PVX_088850 |         | 0         | 49.7666   | 0         | 0         | 0         | 0         | 0         | 0         | 0         | 25.0376    | 0          | 0          | tryptophan-rich antigen (Pv-fam-a)                           |
| PVX_088855 |         | 375.425   | 262.56    | 0         | 1204.58   | 59.7427   | 964.495   | 0         | 0         | 284.755   | 131.819    | 186.853    | 0          | hypothetical protein, conserved                              |
| PVX_088860 |         | 0         | 60.3491   | 0         | 0         | 0         | 0         | 0         | 0         | 0         | 0          | 0          | 0          | sporozoite invasion-associated protein 2, putative (SIAP2)   |
| PVX_088865 |         | 464.051   | 651.401   | 0         | 0         | 2230.52   | 0         | 1438.15   | 647.08    | 528.968   | 162.712    | 277.256    | 0          | Senescence-associated protein, putative                      |
| PVX_088870 |         | 0         | 0         | 0         | 0         | 0         | 0         | 0         | 0         | 0         | 0          | 0          | 0          | early transcribed membrane protein (ETRAMP)                  |
| PVX_088875 |         | 0         | 0         | 0         | 0         | 0         | 0         | 0         | 0         | 0         | 0          | 0          | 0          | hypothetical protein                                         |
| PVX_088880 |         | 73.2498   | 0         | 0         | 0         | 23.2475   | 0         | 0         | 0         | 111.03    | 0          | 72.9032    | 0          | prolyl 4-hydroxylase subunit alpha, putative                 |
| PVX_088885 |         | 0         | 127.007   | 0         | 0         | 0         | 0         | 0         | 0         | 0         | 0          | 72.3137    | 0          | U6 snRNA-associated Sm-like protein LSM8, putative           |
| PVX_088890 |         | 0         | 0         | 0         | 0         | 0         | 0         | 0         | 250.229   | 68.2601   | 94.9072    | 53.7789    | 0          | prohibitin, putative                                         |
| PVX_088895 |         | 599.611   | 0         | 0         | 0         | 0         | 0         | 0         | 277.98    | 75.8057   | 140.348    | 39.7916    | 0          | hypothetical protein, conserved                              |
| PVX_088905 |         | 18.9977   | 0         | 0         | 0         | 12.0427   | 0         | 29.0215   | 0         | 7.19639   | 26.7044    | 7.56258    | 0          | hypothetical protein, conserved                              |
| PVX_088907 |         | 0         | 0         | 0         | 0         | 0         | 0         | 0         | 0         | 0         | 0          | 0          | 0          | hypothetical protein                                         |
| PVX_088910 |         | 0         | 0         | 0         | 0         | 0         | 0         | 0         | 0         | 0         | 0          | 0          | 0          | GPI-anchored micronemal antigen, putative (GAMA)             |
| PVX_088915 |         | 0         | 0         | 0         | 0         | 0         | 0         | 0         | 0         | 0         | 0          | 0          | 0          | hypothetical protein, conserved                              |
| PVX_088920 |         | 0         | 0         | 0         | 0         | 0         | 0         | 0         | 0         | 0         | 0          | 0          | 0          | folate transporter 1, putative (FT1)                         |
| PVX_088930 |         | 108.377   | 0         | 0         | 0         | 68.8515   | 0         | 0         | 0         | 41.0789   | 0          | 43.1479    | 0          | translation initiation factor EIF-2b alpha subunit, putative |
| PVX_088935 |         | 0         | 0         | 192.193   | 0         | 24.5138   | 0         | 0         | 0         | 29.2675   | 27.1327    | 15.3735    | 125.144    | mitochondrial inner membrane protein OXA1, putative (OXA1)   |
| PVX_088940 |         | 0         | 147.844   | 0         | 0         | 13.4333   | 0         | 0         | 0         | 32.0963   | 14.8838    | 8.4313     | 0          | hypothetical protein, conserved                              |
| PVX_088945 |         | 23.9752   | 0         | 0         | 0         | 0         | 0         | 36.6311   | 0         | 18.1644   | 25.2752    | 28.6322    | 0          | leucine-tRNA ligase, putative                                |
| PVX_088950 |         | 0         | 0         | 0         | 0         | 0         | 0         | 0         | 50.3158   | 41.1835   | 25.4655    | 28.85      | 58.6471    | hypothetical protein, conserved                              |
| PVX_088955 |         | 0         | 0         | 0         | 0         | 0         | 0         | 0         | 0         | 0         | 0          | 0          | 0          | rhomboid protease ROM3, putative (ROM3)                      |
| PVX_088960 |         | 502.87    | 250.832   | 357.487   | 229.748   | 113.994   | 0         | 329.784   | 399.15    | 571.674   | 454.294    | 629.187    | 116.386    | protein disulfide isomerase, putative                        |
| PVX_088965 |         | 45.5147   | 52.9347   | 0         | 96.8863   | 14.4246   | 0         | 23.1738   | 63.1872   | 17.2407   | 21.3266    | 48.3157    | 24.5405    | SET domain protein, putative                                 |
| PVX_088970 |         | 0         | 0         | 0         | 0         | 0         | 0         | 0         | 0         | 0         | 0          | 0          | 0          | hypothetical protein, conserved                              |
| PVX_088975 |         | 59.0617   | 0         | 48.9127   | 0         | 43.6801   | 0         | 30.0756   | 27.3326   | 14.9153   | 55.3472    | 58.7782    | 0          | hypothetical protein, conserved                              |
| PVX_088985 |         | 136.865   | 143.358   | 340.507   | 218.835   | 43.4323   | 0         | 0         | 95.0536   | 25.9314   | 72.1273    | 136.217    | 0          | plastid 50S ribosomal protein L21, putative                  |
| PVX_088990 |         | 0         | 0         | 0         | 0         | 0         | 523.119   | 0         | 0         | 0         | 0          | 0          | 0          | hypothetical protein, conserved                              |
| PVX_088995 |         | 0         | 24.0644   | 0         | 0         | 0         | 176.334   | 0         | 0         | 26.1226   | 0          | 6.86239    | 0          | hypothetical protein, conserved                              |
| PVX_089000 |         | 0         | 0         | 0         | 0         | 0         | 0         | 0         | 0         | 0         | 0          | 10.4789    | 0          | hypothetical protein                                         |
| PVX_089010 |         | 0         | 0         | 0         | 0         | 8.15984   | 0         | 0         | 0         | 9.75104   | 9.04533    | 15.3703    | 0          | translation initiation factor IF-2, putative                 |
| PVX_089015 |         | 26.7723   | 37.3698   | 0         | 0         | 0         | 0         | 0         | 37.1718   | 20.284    | 18.8157    | 21.3152    | 43.3192    | ATP-dependent RNA helicase DBP10, putative                   |
| PVX_089020 |         | 0         | 0         | 0         | 0         | 0         | 0         | 0         | 0         | 0         | 0          | 0          | 0          | hypothetical protein, conserved                              |
| PVX_089025 |         | 1429.38   | 1497.59   | 667.17    | 1143.39   | 340.37    | 915.337   | 410.339   | 1489.37   | 1591.29   | 1129.8     | 960.289    | 868.837    | receptor for activated c kinase, putative                    |
| PVX_089030 |         | 0         | 158.39    | 188.125   | 0         | 23.9952   | 0         | 0         | 105.018   | 229.193   | 159.36     | 120.39     | 0          | hypothetical protein, conserved                              |
| PVX_089035 |         | 74.0685   | 34.4616   | 61.3493   | 78.8552   | 0         | 0         | 0         | 0         | 56.117    | 86.7605    | 78.6276    | 0          | ubiquitin conjugation factor E4 B, putative (UBE4B)          |
| PVX_089040 |         | 120.165   | 83.9658   | 299.392   | 0         | 0         | 0         | 0         | 166.994   | 182.202   | 84.4127    | 239.207    | 0          | dehydrodolichyl diphosphate synthetase, putative             |
| PVX_089045 |         | 0         | 0         | 0         | 0         | 15.7199   | 0         | 0         | 0         | 0         | 17.4135    | 39.4592    | 0          | hypothetical protein, conserved                              |

| Gene ID    | Patient 1 | Patient 2 | Patient 3 | Patient 4 | Patient 5 | Patient 6 | Patient 7 | Patient 8 | Patient 9 | Patient 10 | Patient 11 | Patient 12 | Gene Description                                                             |
|------------|-----------|-----------|-----------|-----------|-----------|-----------|-----------|-----------|-----------|------------|------------|------------|------------------------------------------------------------------------------|
| Patient    |           |           |           |           |           |           |           |           |           |            |            |            |                                                                              |
| PVX_089050 | 0         | 0         | 115.485   | 0         | 0         | 0         | 0         | 64.5023   | 17.5979   | 0          | 0          | 75.1967    | alpha/beta hydrolase, putative                                               |
| PVX_089055 | 10.4843   | 14.63     | 0         | 0         | 16.6088   | 17.8577   | 10.6722   | 9.70236   | 31.7686   | 17.1951    | 28.519     | 22.6043    | E3 ubiquitin-protein ligase, putative                                        |
| PVX_089060 | 0         | 23.7893   | 0         | 0         | 0         | 0         | 0         | 47.3254   | 12.9121   | 11.9764    | 13.568     | 0          | hypothetical protein, conserved                                              |
| PVX_089065 | 0         | 28.0794   | 0         | 0         | 0         | 0         | 61.4924   | 0         | 45.7201   | 56.5385    | 24.0205    | 0          | hypothetical protein, conserved                                              |
| PVX_089070 | 0         | 0         | 0         | 0         | 0         | 0         | 0         | 0         | 21.5604   | 0          | 0          | 0          | hypothetical protein, conserved                                              |
| PVX_089075 | 0         | 0         | 0         | 0         | 0         | 0         | 0         | 0         | 0         | 0          | 0          | 0          | hypothetical protein, conserved                                              |
| PVX_089080 | 0         | 0         | 0         | 0         | 0         | 0         | 0         | 0         | 0         | 0          | 272.491    | 0          | cytochrome c oxidase assembly protein, putative                              |
| PVX_089085 | 0         | 29.1954   | 0         | 0         | 26.5273   | 213.959   | 63.9384   | 0         | 31.6912   | 14.696     | 49.9494    | 0          | protein KR1, putative (KR1)                                                  |
| PVX_089087 | 0         | 0         | 0         | 0         | 0         | 0         | 0         | 0         | 0         | 199.393    | 226.655    | 0          | conserved Plasmodium protein, unknown function                               |
| PVX_089090 | 179.793   | 0         | 448.712   | 576.75    | 0         | 0         | 0         | 0         | 68.1816   | 0          | 71.5871    | 0          | hypothetical protein, conserved                                              |
| PVX_089095 | 0         | 0         | 0         | 0         | 0         | 0         | 0         | 0         | 0         | 94.1107    | 0          | 0          | translation initiation factor IF-3, putative                                 |
| PVX_089105 | 0         | 0         | 0         | 0         | 0         | 0         | 0         | 0         | 0         | 0          | 0          | 0          | hypothetical protein, conserved                                              |
| PVX_089110 | 47.8398   | 0         | 0         | 38.1849   | 3.79007   | 0         | 0         | 0         | 4.53025   | 4.20307    | 19.0439    | 58.0316    | hypothetical protein, conserved                                              |
| PVX_089115 | 0         | 42.9182   | 0         | 0         | 0         | 0         | 0         | 0         | 46.5902   | 32.4118    | 6.11972    | 0          | hypothetical protein, conserved                                              |
| PVX_089120 | 60.718    | 0         | 0         | 0         | 6.41509   | 0         | 0         | 28.0993   | 7.6668    | 7.11239    | 16.1137    | 0          | hypothetical protein, conserved                                              |
| PVX_089125 | 0         | 37.9189   | 0         | 173.611   | 0         | 0         | 0         | 0         | 41.1573   | 57.2485    | 21.6216    | 0          | hypothetical protein, conserved                                              |
| PVX_089130 | 0         | 64.1961   | 0         | 0         | 0         | 0         | 0         | 0         | 34.8315   | 0          | 36.5891    | 0          | Fe-S cluster assembly protein DRE2, putative (DRE2)                          |
| PVX_089135 | 97.407    | 0         | 0         | 0         | 0         | 0         | 149.175   | 0         | 36.918    | 0          | 77.5594    | 0          | hypothetical protein, conserved                                              |
| PVX_089140 | 0         | 0         | 157.801   | 202.829   | 20.1282   | 0         | 0         | 0         | 48.0746   | 44.5753    | 63.1355    | 0          | nucleoside transporter 2, putative (NT2)                                     |
| PVX_089145 | 0         | 0         | 0         | 140.137   | 13.9078   | 0         | 0         | 0         | 16.6145   | 15.4088    | 17.4576    | 0          | GTP-binding protein, putative                                                |
| PVX_089150 | 49.4063   | 0         | 122.766   | 0         | 31.3232   | 0         | 37.7442   | 68.5962   | 28.074    | 8.68084    | 108.173    | 39.9688    | hypothetical protein, conserved                                              |
| PVX_089155 | 0         | 0         | 0         | 0         | 0         | 0         | 0         | 0         | 26.4783   | 49.0982    | 27.8178    | 113.2      | 3'-5' exonuclease domain containing protein                                  |
| PVX_089160 | 0         | 0         | 0         | 0         | 0         | 0         | 0         | 0         | 0         | 14.1984    | 0          | 0          | hypothetical protein, conserved                                              |
| PVX_089165 | 232.524   | 0         | 0         | 0         | 73.8747   | 0         | 0         | 161.564   | 88.1397   | 81.6728    | 115.718    | 0          | dicarboxylate/tricarboxylate carrier, putative (DTC)                         |
| PVX_089170 | 153.851   | 80.5436   | 95.6105   | 0         | 0         | 0         | 58.7934   | 106.819   | 131.146   | 148.666    | 122.493    | 0          | DnaJ protein, putative                                                       |
| PVX_089175 | 755.991   | 265.007   | 0         | 0         | 0         | 0         | 584.112   | 0         | 143.54    | 265.19     | 225.815    | 0          | hypothetical protein, conserved                                              |
| PVX_089180 | 79.4962   | 0         | 0         | 0         | 0         | 0         | 0         | 0         | 0         | 27.9278    | 0          | 0          | lipoate-protein ligase B, putative                                           |
| PVX_089185 | 0         | 0         | 0         | 0         | 0         | 0         | 0         | 0         | 0         | 0          | 0          | 0          | hypothetical protein, conserved                                              |
| PVX_089195 | 0         | 0         | 0         | 214.239   | 0         | 0         | 0         | 0         | 0         | 0          | 0          | 0          | alpha/beta hydrolase, putative                                               |
| PVX_089200 | 77.8076   | 40.7236   | 0         | 0         | 6.16538   | 0         | 0         | 27.0058   | 44.2108   | 20.5071    | 58.0755    | 0          | histone acetyltransferase GCN5, putative                                     |
| PVX_089205 | 0         | 92.554    | 0         | 0         | 0         | 0         | 203.044   | 0         | 50.2057   | 186.052    | 131.818    | 0          | clustered-asparagine-rich protein, putative                                  |
| PVX_089210 | 113.318   | 0         | 0         | 0         | 35.9994   | 0         | 0         | 0         | 0         | 119.408    | 112.787    | 0          | hypothetical protein, conserved                                              |
| PVX_089215 | 0         | 18.0999   | 0         | 0         | 0         | 0         | 0         | 0         | 0         | 18.2269    | 20.6481    | 0          | hypothetical protein, conserved                                              |
| PVX_089220 | 0         | 21.1108   | 0         | 0         | 0         | 0         | 0         | 0         | 11.4585   | 0          | 0          | 0          | hypothetical protein, conserved                                              |
| PVX_089225 | 115.961   | 81.0239   | 288.884   | 0         | 36.8414   | 0         | 177.694   | 322.29    | 219.778   | 407.306    | 69.2511    | 188.102    | US snRNP-specific 40 kDa protein, putative                                   |
| PVX_089230 | 0         | 0         | 0         | 0         | 0         | 0         | 0         | 0         | 0         | 0          | 0          | 0          | hypothetical protein, conserved                                              |
| PVX_089235 | 0         | 0         | 107.134   | 0         | 40.9993   | 220.458   | 65.8807   | 59.8414   | 48.7933   | 90.8503    | 60.0422    | 0          | protein transport protein SEC23, putative                                    |
| PVX_089240 | 0         | 0         | 0         | 0         | 0         | 0         | 0         | 0         | 0         | 0          | 0          | 0          | dynein light chain 1, putative (DLC1)                                        |
| PVX_089245 | 0         | 0         | 0         | 0         | 22.2095   | 0         | 0         | 0         | 0         | 0          | 27.8613    | 0          | hypothetical protein, conserved                                              |
| PVX_089250 | 244.012   | 170.778   | 0         | 0         | 0         | 0         | 0         | 339.52    | 185.152   | 171.306    | 145.748    | 397.251    | small nuclear ribonucleoprotein G, putative,SmG, putative                    |
| PVX_089255 | 0         | 0         | 0         | 0         | 13.7212   | 0         | 0         | 0         | 0         | 7.60602    | 21.5403    | 0          | hypothetical protein, conserved                                              |
| PVX_089260 | 0         | 0         | 0         | 0         | 102.619   | 0         | 247.559   | 0         | 0         | 56.65      | 96.3452    | 0          | mediator of RNA polymerase II transcription subunit 7, putative (MED7)       |
| PVX_089265 | 0         | 0         | 0         | 0         | 20.2143   | 0         | 0         | 88.4859   | 48.28     | 89.5312    | 12.681     | 0          | hypothetical protein, conserved                                              |
| PVX_089270 | 305.565   | 0         | 0         | 0         | 0         | 0         | 234.393   | 212.392   | 57.9277   | 214.617    | 121.66     | 0          | hypothetical protein, conserved                                              |
| PVX_089275 | 197.227   | 0         | 0         | 0         | 0         | 1013.67   | 0         | 0         | 224.406   | 0          | 39.2653    | 0          | protein transport protein SEC61 subunit beta, putative                       |
| PVX_089280 | 1608.44   | 749.84    | 1784.04   | 573.278   | 56.8668   | 0         | 1097.63   | 1242.53   | 881.044   | 1004.06    | 676.002    | 1161.65    | 60S ribosomal protein L22, putative                                          |
| PVX_089285 | 51.7975   | 36.162    | 0         | 0         | 32.861    | 0         | 0         | 0         | 19.6255   | 18.1995    | 20.6204    | 0          | hypothetical protein, conserved                                              |
| PVX_089290 | 0         | 0         | 0         | 0         | 32.7932   | 0         | 0         | 0         | 0         | 0          | 20.5533    | 0          | ribosomal RNA small subunit methyltransferase NEP1, putative (NEP1)          |
| PVX_089292 | 0         | 0         | 0         | 0         | 0         | 0         | 0         | 0         | 358.201   | 0          | 187.742    | 0          | conserved Plasmodium protein, unknown function                               |
| PVX_089295 | 0         | 0         | 0         | 0         | 38.2347   | 0         | 61.4371   | 111.618   | 45.679    | 42.3658    | 23.9989    | 0          | ATP-dependent RNA helicase prh1, putative                                    |
| PVX_089300 | 0         | 0         | 0         | 0         | 0         | 0         | 0         | 0         | 0         | 0          | 157.061    | 0          | hypothetical protein, conserved                                              |
| PVX_089305 | 0         | 28.3987   | 0         | 0         | 0         | 0         | 0         | 0         | 61.6531   | 0          | 0          | 0          | protein kinase, putative                                                     |
| PVX_089310 | 0         | 0         | 0         | 0         | 0         | 0         | 0         | 0         | 0         | 23.1744    | 0          | 0          | hypothetical protein, conserved                                              |
| PVX_089315 | 20.8281   | 0         | 0         | 0         | 33.009    | 0         | 0         | 28.9169   | 0         | 14.6386    | 29.0194    | 0          | hypothetical protein, conserved                                              |
| PVX_089320 | 59.2523   | 20.6774   | 0         | 94.6354   | 9.3925    | 0         | 45.2733   | 123.406   | 0         | 31.2317    | 58.9686    | 0          | hypothetical protein, conserved                                              |
| PVX_089325 | 0         | 0         | 0         | 96.0354   | 9.53144   | 0         | 45.9431   | 0         | 34.1677   | 31.6933    | 77.7924    | 48.6499    | 2-oxoglutarate dehydrogenase E1 component, mitochondrial precursor, putative |
| PVX_089330 | 0         | 0         | 0         | 0         | 0         | 0         | 0         | 0         | 0         | 0          | 13.5595    | 0          | hypothetical protein, conserved                                              |
| PVX_089335 | 37.355    | 52.1485   | 0         | 0         | 0         | 0         | 57.0981   | 51.8705   | 14.152    | 26.2519    | 7.4353     | 0          | hypothetical protein, conserved                                              |
| PVX_089340 | 0         | 0         | 0         | 0         | 23.4785   | 0         | 0         | 0         | 0         | 25.9893    | 0          | 0          | hypothetical protein, conserved                                              |
| PVX_089345 | 63.3018   | 44.2002   | 0         | 0         | 20.0854   | 0         | 0         | 0         | 0         | 22.2404    | 0          | 0          | hypothetical protein, conserved                                              |
| PVX_089355 | 0         | 0         | 120.364   | 0         | 15.3538   | 0         | 0         | 67.2249   | 0         | 17.0086    | 28.9061    | 0          | phosphatidylglycerophosphate synthase, putative                              |
| PVX_089360 | 110.792   | 0         | 0         | 0         | 35.195    | 0         | 0         | 0         | 41.995    | 77.8327    | 44.1095    | 0          | hypothetical protein, conserved                                              |



| Gene ID    | Patient 1 | Patient 2 | Patient 3 | Patient 4 | Patient 5 | Patient 6 | Patient 7 | Patient 8 | Patient 9 | Patient 10 | Patient 11 | Patient 12 | Gene Description                                                                |
|------------|-----------|-----------|-----------|-----------|-----------|-----------|-----------|-----------|-----------|------------|------------|------------|---------------------------------------------------------------------------------|
| Patient    |           |           |           |           |           |           |           |           |           |            |            |            |                                                                                 |
| PVX_089365 | 0         | 11.1028   | 39.5255   | 0         | 0         | 0         | 0         | 22.0886   | 24.1075   | 16.774     | 53.8362    | 0          | helicase, putative                                                              |
| PVX_089370 | 0         | 269.356   | 0         | 0         | 61.2926   | 0         | 0         | 0         | 146.058   | 135.219    | 76.6714    | 313.031    | U6 snRNA-associated Sm-like protein LSM3, putative                              |
| PVX_089375 | 0         | 0         | 0         | 0         | 0         | 0         | 0         | 0         | 0         | 0          | 4.27088    | 0          | hypothetical protein, conserved                                                 |
| PVX_089380 | 0         | 0         | 0         | 0         | 0         | 0         | 0         | 0         | 0         | 0          | 0          | 0          | hypothetical protein, conserved                                                 |
| PVX_089385 | 0         | 0         | 0         | 0         | 0         | 0         | 0         | 0         | 0         | 0          | 0          | 0          | hypothetical protein, conserved                                                 |
| PVX_089390 | 90.6026   | 0         | 0         | 0         | 0         | 0         | 0         | 125.875   | 0         | 0          | 36.0704    | 0          | hypothetical protein, conserved                                                 |
| PVX_089395 | 0         | 0         | 0         | 0         | 0         | 0         | 0         | 0         | 0         | 0          | 0          | 0          | perforin-like protein 4 (PLP4)                                                  |
| PVX_089400 | 140.837   | 24.5758   | 0         | 0         | 0         | 0         | 0         | 48.89     | 13.3389   | 12.3721    | 14.0164    | 0          | hypothetical protein, conserved                                                 |
| PVX_089405 | 0         | 0         | 0         | 0         | 0         | 0         | 0         | 0         | 0         | 0          | 9.9753     | 0          | perforin-like protein 5 (PLP5)                                                  |
| PVX_089410 | 0         | 0         | 0         | 0         | 0         | 0         | 0         | 0         | 50.4297   | 0          | 0          | 0          | hypothetical protein, conserved                                                 |
| PVX_089415 | 21.2991   | 0         | 0         | 0         | 6.75115   | 0         | 0         | 29.5709   | 16.1366   | 7.48475    | 38.1543    | 0          | hypothetical protein, conserved                                                 |
| PVX_089425 | 1280.7    | 1379.21   | 1637.17   | 935.257   | 603.339   | 0         | 727.083   | 965.384   | 1580.33   | 1504.35    | 1638.74    | 1066.02    | heat shock 70 kDa protein, putative                                             |
| PVX_089430 | 0         | 57.7801   | 0         | 0         | 26.2623   | 0         | 126.638   | 0         | 62.704    | 87.1898    | 49.4036    | 0          | U3 small nucleolar ribonucleoprotein protein, putative                          |
| PVX_089435 | 0         | 44.3888   | 0         | 0         | 40.3423   | 0         | 0         | 88.2972   | 120.443   | 22.3351    | 88.5781    | 0          | RAD protein (Pv-fam-e)                                                          |
| PVX_089440 | 0         | 0         | 0         | 0         | 0         | 0         | 0         | 0         | 0         | 0          | 0          | 0          | hypothetical protein                                                            |
| PVX_089445 | 94.0297   | 65.6818   | 0         | 300.905   | 0         | 0         | 0         | 0         | 35.6371   | 0          | 37.435     | 0          | RAD protein (Pv-fam-e)                                                          |
| PVX_089450 | 0         | 0         | 0         | 0         | 0         | 0         | 0         | 0         | 0         | 0          | 0          | 0          | RAD protein (Pv-fam-e)                                                          |
| PVX_089455 | 0         | 0         | 0         | 0         | 0         | 0         | 131.894   | 0         | 32.6506   | 0          | 0          | 0          | RAD protein (Pv-fam-e)                                                          |
| PVX_089460 | 0         | 0         | 0         | 0         | 0         | 0         | 0         | 0         | 0         | 0          | 0          | 0          | RAD protein (Pv-fam-e)                                                          |
| PVX_089465 | 77.0328   | 0         | 0         | 0         | 0         | 0         | 0         | 0         | 0         | 0          | 15.3338    | 0          | RAD protein (Pv-fam-e)                                                          |
| PVX_089467 | 0         | 0         | 0         | 0         | 0         | 0         | 0         | 0         | 0         | 0          | 0          | 0          | RAD protein (Pv-fam-e)                                                          |
| PVX_089470 | 0         | 81.0239   | 0         | 0         | 0         | 0         | 0         | 0         | 0         | 0          | 23.0837    | 0          | RAD protein (Pv-fam-e)                                                          |
| PVX_089473 | 0         | 86.406    | 0         | 0         | 0         | 0         | 0         | 0         | 0         | 0          | 0          | 0          | RAD protein (Pv-fam-e)                                                          |
| PVX_089475 | 0         | 0         | 0         | 0         | 0         | 0         | 0         | 0         | 0         | 0          | 0          | 0          | RAD protein (Pv-fam-e)                                                          |
| PVX_089480 | 28.8153   | 20.1113   | 0         | 0         | 0         | 0         | 44.0331   | 0         | 21.8322   | 70.8798    | 57.3547    | 93.2552    | hypothetical protein, conserved                                                 |
| PVX_089485 | 67.5546   | 94.3446   | 0         | 0         | 0         | 0         | 0         | 93.833    | 25.5984   | 47.468     | 80.6814    | 0          | hypothetical protein, conserved                                                 |
| PVX_089490 | 0         | 114.858   | 409.819   | 0         | 52.2551   | 0         | 252.127   | 0         | 62.2924   | 57.689     | 0          | 0          | hypothetical protein, conserved                                                 |
| PVX_089495 | 0         | 0         | 0         | 910.753   | 0         | 0         | 0         | 197.531   | 0         | 0          | 113.159    | 0          | hypothetical protein, conserved                                                 |
| PVX_089500 | 0         | 0         | 0         | 0         | 0         | 0         | 0         | 0         | 0         | 0          | 0          | 0          | dynactin subunit 6, putative                                                    |
| PVX_089505 | 89.7846   | 62.7131   | 0         | 0         | 171.041   | 0         | 0         | 0         | 442.354   | 599.271    | 428.936    | 145.534    | 14-3-3 protein, putative (14-3-3l)                                              |
| PVX_089510 | 0         | 0         | 0         | 0         | 0         | 0         | 0         | 0         | 0         | 0          | 0          | 0          | D13 protein, putative                                                           |
| PVX_089515 | 0         | 57.3555   | 0         | 0         | 0         | 0         | 0         | 0         | 0         | 28.85      | 49.0409    | 0          | conserved protein, unknown function                                             |
| PVX_089520 | 0         | 0         | 0         | 0         | 0         | 0         | 0         | 0         | 0         | 0          | 177.296    | 0          | high mobility group protein B2, putative (HMGB2)                                |
| PVX_089525 | 0         | 0         | 0         | 0         | 0         | 0         | 0         | 0         | 0         | 0          | 0          | 0          | hypothetical protein, conserved                                                 |
| PVX_089530 | 0         | 0         | 0         | 0         | 0         | 0         | 0         | 0         | 0         | 9.60613    | 0          | 0          | rhopty neck protein 5, putative (RONS5)                                         |
| PVX_089535 | 0         | 0         | 0         | 0         | 0         | 0         | 0         | 0         | 0         | 10.7928    | 12.2268    | 0          | hypothetical protein, conserved                                                 |
| PVX_089540 | 347.037   | 0         | 432.975   | 0         | 110.412   | 0         | 266.382   | 0         | 197.398   | 182.79     | 414.529    | 0          | protein kinase C inhibitor, putative,14 kDa zinc-binding protein, putative      |
| PVX_089542 | 0         | 0         | 0         | 0         | 0         | 0         | 96.0219   | 0         | 23.7843   | 0          | 37.4827    | 101.667    | conserved Plasmodium protein, unknown function                                  |
| PVX_089545 | 34.437    | 0         | 0         | 0         | 0         | 0         | 0         | 0         | 0         | 0          | 0          | 0          | hypothetical protein                                                            |
| PVX_089550 | 0         | 32.5262   | 0         | 0         | 0         | 0         | 0         | 0         | 0         | 49.1136    | 18.5483    | 0          | hypothetical protein, conserved                                                 |
| PVX_089555 | 0         | 29.9949   | 0         | 0         | 27.254    | 0         | 0         | 0         | 16.2794   | 15.0981    | 76.9747    | 0          | tRNA modification GTPase trmE, putative                                         |
| PVX_089560 | 87.932    | 61.4176   | 218.885   | 0         | 27.9173   | 0         | 0         | 122.162   | 33.3247   | 0          | 0          | 0          | ubiquitin-activating enzyme E1C, putative                                       |
| PVX_089565 | 102.073   | 0         | 0         | 0         | 32.4182   | 0         | 0         | 0         | 0         | 35.8552    | 101.594    | 0          | adenylate kinase 2, putative (AK2)                                              |
| PVX_089570 | 0         | 0         | 0         | 0         | 0         | 0         | 0         | 0         | 0         | 0          | 21.189     | 0          | meiotic recombination protein DMC1, putative (DMC1)                             |
| PVX_089575 | 0         | 0         | 0         | 0         | 0         | 0         | 0         | 0         | 159.015   | 0          | 83.368     | 0          | trafficking protein particle complex subunit 2-like protein, putative (TRAPP2L) |
| PVX_089580 | 60.6169   | 126.923   | 75.3233   | 0         | 67.2628   | 0         | 0         | 210.414   | 206.673   | 170.404    | 205.111    | 0          | chaperone protein ClpB1, putative (ClpB1)                                       |
| PVX_089585 | 0         | 0         | 0         | 0         | 0         | 0         | 0         | 0         | 0         | 0          | 0          | 466.395    | heat shock protein, putative                                                    |
| PVX_089590 | 0         | 0         | 0         | 0         | 45.5403   | 0         | 219.695   | 0         | 54.3081   | 0          | 142.581    | 0          | hypothetical protein, conserved                                                 |
| PVX_089592 | 0         | 0         | 0         | 0         | 0         | 0         | 0         | 0         | 0         | 0          | 7.44773    | 0          | hypothetical protein, conserved                                                 |
| PVX_089595 | 0         | 0         | 0         | 0         | 65.3922   | 0         | 0         | 0         | 0         | 72.1044    | 163.551    | 333.984    | vacuolar protein sorting-associated protein 2, putative (VPS2)                  |
| PVX_089600 | 0         | 0         | 0         | 0         | 72.4063   | 0         | 0         | 0         | 172.436   | 0          | 45.2502    | 0          | phosphoantiothencysteine decarboxylase, putative                                |
| PVX_089605 | 76.2453   | 106.494   | 0         | 0         | 0         | 390.449   | 0         | 105.913   | 202.253   | 53.5723    | 30.3539    | 0          | WD domain, G-beta repeat domain containing protein                              |
| PVX_089610 | 0         | 0         | 0         | 0         | 0         | 0         | 0         | 0         | 0         | 0          | 10.0428    | 0          | dihydroipoamide dehydrogenase, putative                                         |
| PVX_089615 | 22.2579   | 15.5333   | 0         | 0         | 0         | 0         | 0         | 30.9023   | 8.43154   | 0          | 13.2906    | 0          | vacuolar protein sorting-associated protein 9, putative (VPS9)                  |
| PVX_089620 | 0         | 0         | 0         | 0         | 29.1217   | 0         | 140.435   | 0         | 0         | 32.2191    | 73.0282    | 0          | ubiquitin, putative                                                             |
| PVX_089625 | 94.6262   | 330.495   | 235.593   | 0         | 60.0952   | 0         | 144.903   | 0         | 179.317   | 398.887    | 339.052    | 460.21     | eukaryotic translation initiation factor 3 subunit 4, putative                  |
| PVX_089630 | 0         | 0         | 0         | 0         | 0         | 0         | 0         | 0         | 0         | 0          | 13.3963    | 109.02     | hypothetical protein, conserved                                                 |
| PVX_089632 | 0         | 0         | 752.671   | 0         | 0         | 0         | 0         | 418.43    | 114.073   | 210.944    | 59.8451    | 0          | conserved Plasmodium protein, unknown function                                  |
| PVX_089635 | 89.1584   | 0         | 0         | 285.278   | 0         | 0         | 0         | 0         | 304.108   | 93.9621    | 159.729    | 0          | phosphoglycerate mutase, putative                                               |
| PVX_089640 | 312.707   | 109.194   | 194.549   | 500.125   | 124.071   | 0         | 119.651   | 325.795   | 296.257   | 164.787    | 217.861    | 0          | 26S proteasome AAA-ATPase subunit RPT3, putative                                |
| PVX_089645 | 45.0677   | 0         | 0         | 0         | 14.2934   | 0         | 0         | 0         | 17.0748   | 31.6709    | 71.7645    | 0          | hypothetical protein, conserved                                                 |
| PVX_089650 | 0         | 0         | 0         | 0         | 0         | 0         | 0         | 0         | 100.859   | 46.7203    | 26.4812    | 0          | 50S ribosomal protein L10, putative                                             |

| Gene ID    | Patient 1 | Patient 2 | Patient 3 | Patient 4 | Patient 5 | Patient 6 | Patient 7 | Patient 8 | Patient 9 | Patient 10 | Patient 11 | Patient 12 | Gene Description                                              |
|------------|-----------|-----------|-----------|-----------|-----------|-----------|-----------|-----------|-----------|------------|------------|------------|---------------------------------------------------------------|
| Patient    |           |           |           |           |           |           |           |           |           |            |            |            |                                                               |
| PVX_089655 | 0         | 25.3234   | 0         | 0         | 11.5038   | 0         | 0         | 50.377    | 68.7227   | 89.2375    | 72.2128    | 117.437    | ubiquitin carboxyl-terminal hydrolase 13, putative (USP13)    |
| PVX_089660 | 0         | 0         | 0         | 151.279   | 0         | 0         | 0         | 32.8818   | 0         | 8.32251    | 56.5673    | 76.6353    | chromosome associated protein, putative                       |
| PVX_089665 | 0         | 0         | 0         | 0         | 6.7001    | 0         | 0         | 29.3473   | 8.00729   | 0          | 0          | 0          | hypothetical protein, conserved                               |
| PVX_089667 | 0         | 0         | 0         | 0         | 0         | 0         | 0         | 0         | 0         | 0          | 0          | 0          | calmodulin-like protein                                       |
| PVX_089670 | 0         | 0         | 0         | 0         | 0         | 0         | 0         | 0         | 0         | 0          | 0          | 0          | Rab5-interacting protein, putative                            |
| PVX_089675 | 88.1919   | 0         | 0         | 0         | 0         | 0         | 0         | 0         | 33.4233   | 61.9627    | 35.1106    | 0          | hypothetical protein, conserved                               |
| PVX_089680 | 0         | 0         | 0         | 0         | 0         | 0         | 144.291   | 0         | 0         | 0          | 18.7569    | 0          | RNA-binding protein, putative                                 |
| PVX_089685 | 0         | 0         | 0         | 0         | 0         | 0         | 0         | 0         | 0         | 0          | 0          | 0          | hypothetical protein, conserved                               |
| PVX_089690 | 0         | 36.5858   | 0         | 0         | 0         | 0         | 80.1394   | 0         | 0         | 36.8251    | 31.2928    | 0          | GTP-binding protein, putative                                 |
| PVX_089695 | 0         | 0         | 0         | 0         | 0         | 0         | 0         | 0         | 0         | 0          | 0          | 0          | hypothetical protein, conserved                               |
| PVX_089700 | 0         | 0         | 0         | 0         | 0         | 0         | 0         | 0         | 0         | 0          | 0          | 0          | armadillo-domain containing rhoGTPase protein, putative (ARO) |
| PVX_089705 | 97.09     | 339.111   | 0         | 0         | 30.8318   | 0         | 0         | 0         | 73.5955   | 170.528    | 96.6337    | 0          | arsenical pump-driving ATPase, putative                       |
| PVX_089710 | 0         | 0         | 177.459   | 0         | 22.635    | 0         | 0         | 0         | 0         | 50.1152    | 56.7886    | 0          | hypothetical protein, conserved                               |
| PVX_089715 | 0         | 0         | 0         | 0         | 0         | 0         | 25.5389   | 0         | 12.6663   | 17.6263    | 19.9666    | 27.0449    | hypothetical protein, conserved                               |
| PVX_089720 | 0         | 0         | 0         | 0         | 0         | 0         | 0         | 0         | 0         | 0          | 19.7098    | 32.0392    | protein kinase domain containing protein                      |
| PVX_089725 | 211.19    | 147.744   | 0         | 0         | 67.2536   | 0         | 0         | 0         | 160.211   | 148.288    | 210.229    | 0          | coatomer subunit zeta, putative                               |
| PVX_089730 | 0         | 179.262   | 0         | 0         | 0         | 0         | 0         | 0         | 97.2426   | 45.0475    | 127.661    | 0          | nuclear cap-binding protein, putative                         |
| PVX_089735 | 416.851   | 72.8044   | 0         | 0         | 33.0995   | 0         | 159.632   | 144.803   | 78.9985   | 36.6064    | 62.2343    | 168.99     | adenylate kinase 1, putative                                  |
| PVX_089740 | 147.223   | 0         | 0         | 0         | 0         | 0         | 0         | 102.252   | 83.684    | 77.5833    | 102.568    | 0          | hypothetical protein, conserved                               |
| PVX_089745 | 44.9771   | 0         | 0         | 0         | 0         | 0         | 0         | 0         | 0         | 0          | 8.95252    | 0          | hypothetical protein, conserved                               |
| PVX_089750 | 928.935   | 648.651   | 825.341   | 636.51    | 147.385   | 339.688   | 203.031   | 829.46    | 578.283   | 676.043    | 594.342    | 0          | 60S ribosomal protein L15-1, putative                         |
| PVX_089755 | 0         | 0         | 0         | 0         | 0         | 0         | 0         | 0         | 54.7088   | 25.3607    | 0          | 116.951    | RNA-binding protein, putative                                 |
| PVX_089760 | 0         | 0         | 0         | 0         | 0         | 0         | 0         | 0         | 0         | 14.084     | 0          | 64.8794    | hypothetical protein                                          |
| PVX_089765 | 99.0653   | 172.899   | 0         | 0         | 0         | 0         | 151.483   | 206.365   | 206.438   | 191.443    | 157.75     | 80.198     | RAD protein (Pv-fam-e)                                        |
| PVX_089770 | 0         | 0         | 0         | 0         | 33.8908   | 0         | 0         | 0         | 0         | 0          | 0          | 0          | hypothetical protein                                          |
| PVX_089775 | 0         | 0         | 0         | 0         | 37.8749   | 611.228   | 0         | 0         | 90.3721   | 83.7385    | 47.459     | 0          | RAD protein (Pv-fam-e)                                        |
| PVX_089780 | 0         | 0         | 0         | 0         | 0         | 0         | 0         | 0         | 162.826   | 0          | 170.722    | 701.473    | hypothetical protein                                          |
| PVX_089785 | 0         | 0         | 0         | 0         | 0         | 0         | 0         | 0         | 0         | 0          | 0          | 0          | RAD protein (Pv-fam-e)                                        |
| PVX_089790 | 0         | 68.4918   | 0         | 0         | 0         | 0         | 0         | 0         | 37.1608   | 34.4418    | 19.5173    | 0          | RAD protein (Pv-fam-e)                                        |
| PVX_089795 | 0         | 0         | 0         | 0         | 0         | 0         | 0         | 0         | 44.6503   | 0          | 0          | 0          | RAD protein (Pv-fam-e)                                        |
| PVX_089800 | 0         | 0         | 0         | 0         | 0         | 0         | 0         | 0         | 0         | 0          | 0          | 0          | RAD protein (Pv-fam-e)                                        |
| PVX_089805 | 0         | 527.074   | 0         | 0         | 0         | 386.489   | 0         | 0         | 114.403   | 26.5152    | 0          | 0          | RAD protein (Pv-fam-e)                                        |
| PVX_089810 | 0         | 234.549   | 0         | 0         | 0         | 573.653   | 0         | 0         | 127.246   | 235.832    | 111.377    | 181.496    | RAD protein (Pv-fam-e)                                        |
| PVX_089815 | 0         | 0         | 0         | 0         | 0         | 0         | 0         | 0         | 0         | 0          | 0          | 0          | RAD protein (Pv-fam-e)                                        |
| PVX_089820 | 0         | 0         | 0         | 0         | 0         | 0         | 0         | 0         | 0         | 0          | 0          | 0          | RAD protein (Pv-fam-e)                                        |
| PVX_089825 | 0         | 0         | 0         | 0         | 0         | 0         | 0         | 0         | 0         | 40.573     | 0          | 0          | RAD protein (Pv-fam-e)                                        |
| PVX_089830 | 0         | 0         | 0         | 0         | 0         | 0         | 0         | 267.216   | 72.8722   | 0          | 0          | 0          | RAD protein (Pv-fam-e)                                        |
| PVX_089835 | 0         | 0         | 0         | 0         | 0         | 0         | 0         | 0         | 0         | 0          | 0          | 0          | RAD protein (Pv-fam-e)                                        |
| PVX_089840 | 108.509   | 151.62    | 0         | 0         | 0         | 0         | 0         | 0         | 575.803   | 304.917    | 43.2002    | 0          | RAD protein (Pv-fam-e)                                        |
| PVX_089845 | 0         | 0         | 0         | 0         | 0         | 0         | 0         | 0         | 0         | 61.5259    | 34.8823    | 284.699    | RAD protein (Pv-fam-e)                                        |
| PVX_089850 | 0         | 226.946   | 0         | 0         | 20.6261   | 332.766   | 99.4465   | 0         | 49.2623   | 91.3515    | 25.8779    | 0          | RAD protein (Pv-fam-e)                                        |
| PVX_089852 | 0         | 0         | 0         | 0         | 0         | 0         | 0         | 0         | 0         | 0          | 0          | 0          | RAD protein (Pv-fam-e)                                        |
| PVX_089855 | 0         | 0         | 0         | 0         | 0         | 0         | 0         | 0         | 0         | 0          | 0          | 0          | RAD protein (Pv-fam-e)                                        |
| PVX_089860 | 0         | 0         | 0         | 0         | 0         | 0         | 0         | 0         | 0         | 63.3858    | 0          | 0          | RAD protein (Pv-fam-e)                                        |
| PVX_089863 | 0         | 126.237   | 0         | 0         | 0         | 0         | 0         | 0         | 0         | 0          | 0          | 0          | RAD protein (Pv-fam-e)                                        |
| PVX_089865 | 92.6666   | 0         | 0         | 0         | 0         | 0         | 0         | 0         | 70.2404   | 65.105     | 92.2305    | 0          | RAD protein (Pv-fam-e)                                        |
| PVX_089867 | 0         | 0         | 0         | 0         | 0         | 0         | 0         | 0         | 0         | 63.3858    | 0          | 0          | RAD protein (Pv-fam-e)                                        |
| PVX_089870 | 0         | 126.237   | 0         | 0         | 0         | 0         | 0         | 0         | 0         | 0          | 0          | 0          | RAD protein (Pv-fam-e)                                        |
| PVX_089875 | 0         | 0         | 0         | 0         | 0         | 0         | 0         | 0         | 0         | 0          | 0          | 0          | RAD protein (Pv-fam-e)                                        |
| PVX_089880 | 0         | 45.9571   | 0         | 0         | 0         | 0         | 0         | 0         | 0         | 46.2466    | 13.1007    | 0          | RAD protein (Pv-fam-e)                                        |
| PVX_089885 | 0         | 0         | 0         | 0         | 0         | 0         | 0         | 0         | 0         | 127.543    | 0          | 0          | RAD protein (Pv-fam-e)                                        |
| PVX_089890 | 0         | 0         | 0         | 0         | 0         | 0         | 0         | 0         | 0         | 0          | 0          | 0          | RAD protein (Pv-fam-e)                                        |
| PVX_089895 | 0         | 35.5242   | 126.533   | 0         | 16.1405   | 0         | 0         | 0         | 38.5589   | 17.8788    | 70.8991    | 0          | glutamyl-tRNA(Gln) amidotransferase subunit A, putative       |
| PVX_089900 | 0         | 137.951   | 0         | 0         | 0         | 0         | 0         | 0         | 74.802    | 138.494    | 39.2653    | 0          | hypothetical protein, conserved                               |
| PVX_089905 | 0         | 0         | 0         | 76.6337   | 0         | 0         | 0         | 0         | 0         | 0          | 38.207     | 0          | DNA helicase MCM9, putative (MCM9)                            |
| PVX_089910 | 24.2875   | 33.9002   | 0         | 77.5703   | 30.7958   | 0         | 0         | 33.7209   | 18.401    | 17.0696    | 29.0052    | 0          | histone acetyltransferase, putative                           |
| PVX_089915 | 0         | 0         | 0         | 0         | 43.4467   | 0         | 0         | 189.979   | 0         | 48.0039    | 136.047    | 0          | repressor of RNA polymerase III transcription MAF1, putative  |
| PVX_089920 | 0         | 66.6636   | 0         | 0         | 30.3045   | 0         | 0         | 0         | 72.339    | 33.524     | 132.979    | 0          | prohibitin-like protein, putative                             |
| PVX_089925 | 0         | 0         | 0         | 0         | 0         | 0         | 0         | 1792.25   | 0         | 445.746    | 0          | 0          | hypothetical protein, conserved                               |
| PVX_089930 | 240.085   | 0         | 0         | 0         | 76.5095   | 0         | 369.36    | 0         | 0         | 84.2762    | 430.203    | 0          | small GTP-binding protein sar1, putative                      |
| PVX_089935 | 56.4649   | 9.85036   | 0         | 0         | 4.47363   | 0         | 0         | 19.5971   | 21.3884   | 34.7256    | 56.1934    | 22.8328    | hypothetical protein, conserved                               |
| PVX_089940 | 0         | 61.0573   | 0         | 0         | 0         | 0         | 0         | 0         | 0         | 0          | 0          | 0          | hypothetical protein, conserved                               |

| Gene ID    | Patient 1 | Patient 2 | Patient 3 | Patient 4 | Patient 5 | Patient 6 | Patient 7 | Patient 8 | Patient 9 | Patient 10 | Patient 11 | Patient 12 | Gene Description                                                               |
|------------|-----------|-----------|-----------|-----------|-----------|-----------|-----------|-----------|-----------|------------|------------|------------|--------------------------------------------------------------------------------|
| Patient    |           |           |           |           |           |           |           |           |           |            |            |            |                                                                                |
| PVX_089945 | 0         | 0         | 0         | 0         | 0         | 0         | 0         | 0         | 0         | 0          | 0          | 0          | mRNA-binding protein PUF2, putative (PUF2)                                     |
| PVX_089950 | 53.5326   | 37.3742   | 133.127   | 0         | 33.9632   | 0         | 81.8684   | 0         | 141.982   | 112.854    | 127.867    | 0          | bifunctional dihydrofolate reductase-thymidylate synthase, putative (DHFR-TS)  |
| PVX_089955 | 0         | 32.4249   | 115.485   | 0         | 44.1947   | 0         | 71.0171   | 129.005   | 35.1957   | 114.242    | 64.7169    | 0          | hypothetical protein, conserved                                                |
| PVX_089960 | 16.6616   | 0         | 0         | 0         | 3.51945   | 0         | 0         | 0         | 2.10362   | 0          | 8.84334    | 0          | hypothetical protein, conserved                                                |
| PVX_089970 | 89.7846   | 62.7131   | 447.017   | 0         | 114.027   | 0         | 137.468   | 0         | 34.0272   | 94.6217    | 89.3617    | 145.534    | hypothetical protein, conserved                                                |
| PVX_089972 | 0         | 0         | 0         | 0         | 0         | 0         | 0         | 0         | 0         | 0          | 7.0498     | 0          | conserved Plasmodium protein, unknown function                                 |
| PVX_089975 | 0         | 0         | 0         | 226.469   | 0         | 0         | 0         | 0         | 0         | 0          | 0          | 0          | hypothetical protein, conserved                                                |
| PVX_089980 | 0         | 38.1973   | 0         | 0         | 17.3558   | 0         | 0         | 0         | 41.4594   | 96.114     | 32.6703    | 0          | cdc2-related protein kinase 1, putative                                        |
| PVX_089985 | 39.5681   | 0         | 0         | 0         | 12.5475   | 0         | 0         | 0         | 59.9626   | 13.9034    | 15.7517    | 0          | hypothetical protein, conserved                                                |
| PVX_089990 | 13.6613   | 0         | 0         | 21.8053   | 2.16434   | 0         | 0         | 0         | 5.17451   | 4.8011     | 5.43819    | 0          | hypothetical protein, conserved                                                |
| PVX_089995 | 0         | 0         | 0         | 0         | 0         | 0         | 0         | 35.4835   | 29.0442   | 8.98076    | 10.1737    | 0          | hypothetical protein, conserved                                                |
| PVX_090000 | 166.473   | 77.4849   | 138.005   | 177.385   | 88.0184   | 0         | 84.8684   | 77.0675   | 252.305   | 467.925    | 209.863    | 0          | hypothetical protein, conserved                                                |
| PVX_090005 | 169.194   | 59.0536   | 0         | 0         | 13.4142   | 0         | 0         | 0         | 32.0508   | 89.176     | 50.5161    | 0          | hypothetical protein                                                           |
| PVX_090010 | 0         | 0         | 0         | 0         | 0         | 0         | 0         | 0         | 65.2922   | 0          | 102.834    | 0          | hypothetical protein, conserved                                                |
| PVX_090015 | 0         | 306.765   | 0         | 937.661   | 186.046   | 0         | 0         | 203.352   | 221.853   | 256.878    | 378.589    | 0          | trafficking protein particle complex subunit 3, putative (BET3)                |
| PVX_090020 | 0         | 0         | 0         | 0         | 0         | 0         | 0         | 0         | 0         | 0          | 3.63766    | 0          | hypothetical protein, conserved                                                |
| PVX_090025 | 0         | 50.7785   | 0         | 0         | 23.0772   | 0         | 0         | 0         | 82.6636   | 25.546     | 72.3701    | 117.808    | RNA-binding protein NOB1, putative                                             |
| PVX_090030 | 0         | 0         | 0         | 0         | 0         | 0         | 0         | 0         | 0         | 39.6024    | 0          | 0          | hypothetical protein, conserved                                                |
| PVX_090035 | 0         | 0         | 0         | 0         | 0         | 0         | 0         | 0         | 0         | 0          | 12.4072    | 0          | hypothetical protein, conserved                                                |
| PVX_090040 | 0         | 0         | 0         | 0         | 25.1666   | 0         | 0         | 0         | 0         | 0          | 0          | 0          | hypothetical protein, conserved                                                |
| PVX_090045 | 0         | 66.7348   | 0         | 0         | 60.6739   | 0         | 0         | 0         | 0         | 134.239    | 76.0689    | 0          | hypothetical protein, conserved                                                |
| PVX_090050 | 0         | 302.156   | 0         | 0         | 551.593   | 0         | 0         | 0         | 490.828   | 151.039    | 343.084    | 0          | Got1 domain containing protein                                                 |
| PVX_090055 | 0         | 0         | 0         | 0         | 35.5926   | 0         | 0         | 0         | 0         | 39.3546    | 22.3033    | 0          | hypothetical protein, conserved                                                |
| PVX_090060 | 13.5028   | 9.42225   | 0         | 0         | 8.55833   | 0         | 0         | 18.7454   | 0         | 14.2357    | 29.5634    | 0          | hypothetical protein, conserved                                                |
| PVX_090065 | 0         | 0         | 0         | 0         | 0         | 0         | 0         | 0         | 0         | 0          | 11.7523    | 0          | hypothetical protein, conserved                                                |
| PVX_090070 | 159.453   | 111.323   | 528.709   | 509.681   | 33.7208   | 271.996   | 325.135   | 295.264   | 120.831   | 149.4      | 285.65     | 172.131    | ran binding protein 1, putative                                                |
| PVX_090075 | 0         | 0         | 0         | 0         | 0         | 0         | 0         | 0         | 0         | 35.4911    | 20.1123    | 0          | hypothetical protein, conserved                                                |
| PVX_090080 | 0         | 300.006   | 0         | 274.846   | 0         | 0         | 0         | 0         | 65.1131   | 60.3574    | 119.702    | 0          | ribosomal protein L7Ae-related protein, putative                               |
| PVX_090085 | 6.93707   | 4.84027   | 0         | 22.1451   | 2.19807   | 0         | 10.5932   | 19.2597   | 7.8827    | 4.8759     | 13.8073    | 0          | phosphatidylinositol 4-kinase, putative                                        |
| PVX_090090 | 0         | 6.22595   | 0         | 28.4857   | 0         | 0         | 0         | 0         | 23.6583   | 0          | 7.10386    | 0          | CW-type zinc finger domain-containing protein                                  |
| PVX_090095 | 51.7675   | 108.423   | 128.732   | 496.394   | 16.421    | 0         | 158.329   | 71.8936   | 58.8424   | 36.3779    | 82.4338    | 83.8217    | serine/threonine protein kinase RIO2, putative (RIO2)                          |
| PVX_090100 | 0         | 0         | 0         | 67.4578   | 0         | 0         | 0         | 0         | 0         | 0          | 0          | 0          | hypothetical protein, conserved                                                |
| PVX_090105 | 67.1491   | 0         | 0         | 0         | 0         | 0         | 102.737   | 0         | 0         | 0          | 0          | 0          | holo-(acyl-carrier protein) synthase, putative                                 |
| PVX_090110 | 18.1441   | 12.6602   | 45.0652   | 0         | 5.7494    | 0         | 0         | 0         | 20.6177   | 12.7529    | 28.8907    | 0          | transcription factor with AP2 domain(s), putative (ApiAP2)                     |
| PVX_090115 | 143.936   | 0         | 358.86    | 0         | 0         | 0         | 0         | 200.077   | 109.141   | 101.1      | 28.6537    | 233.667    | ribosome-recycling factor, putative (RRF2)                                     |
| PVX_090120 | 0         | 0         | 0         | 0         | 0         | 0         | 0         | 0         | 0         | 0          | 0          | 0          | hypothetical protein, conserved                                                |
| PVX_090125 | 0         | 0         | 0         | 0         | 22.9651   | 0         | 0         | 0         | 54.8416   | 25.4222    | 100.827    | 0          | hypothetical protein                                                           |
| PVX_090130 | 0         | 0         | 0         | 0         | 0         | 0         | 0         | 0         | 0         | 0          | 12.3554    | 0          | hypothetical protein, conserved                                                |
| PVX_090135 | 0         | 0         | 0         | 0         | 0         | 0         | 0         | 0         | 0         | 0          | 0          | 0          | hypothetical protein, conserved                                                |
| PVX_090137 | 0         | 0         | 0         | 0         | 0         | 0         | 0         | 0         | 0         | 0          | 0          | 0          | conserved Plasmodium protein, unknown function                                 |
| PVX_090140 | 0         | 0         | 0         | 0         | 0         | 0         | 179.091   | 0         | 0         | 0          | 116.323    | 0          | steroid dehydrogenase, putative                                                |
| PVX_090145 | 51.8876   | 0         | 0         | 0         | 0         | 0         | 0         | 0         | 0         | 18.2311    | 51.6406    | 0          | hypothetical protein, conserved                                                |
| PVX_090150 | 34.3736   | 43.1709   | 17.074    | 0         | 10.8915   | 70.2642   | 0         | 47.7164   | 28.6435   | 12.0802    | 27.3664    | 0          | erythrocyte membrane-associated antigen, putative                              |
| PVX_090155 | 311.347   | 54.3594   | 0         | 248.973   | 0         | 0         | 238.258   | 540.629   | 29.4968   | 54.6901    | 340.864    | 126.126    | tubulin alpha chain, putative                                                  |
| PVX_090160 | 1392.88   | 1150.34   | 631.094   | 811.174   | 80.4804   | 2597.7    | 582.306   | 527.952   | 432.014   | 845.01     | 983.074    | 616.391    | 40S ribosomal protein S19, putative (RPS19)                                    |
| PVX_090165 | 21.2202   | 22.2103   | 26.3539   | 0         | 13.4488   | 0         | 64.816    | 14.7291   | 32.1512   | 22.3723    | 14.7826    | 0          | pre-mRNA-splicing helicase BRR2, putative                                      |
| PVX_090170 | 0         | 0         | 0         | 0         | 137.898   | 0         | 0         | 0         | 0         | 0          | 171.542    | 0          | hypothetical protein, conserved                                                |
| PVX_090175 | 0         | 64.863    | 0         | 0         | 29.4851   | 0         | 142.189   | 0         | 175.966   | 260.96     | 221.813    | 0          | eukaryotic initiation factor, putative                                         |
| PVX_090180 | 0         | 0         | 0         | 0         | 0         | 0         | 0         | 0         | 0         | 0          | 30.2765    | 0          | hypothetical protein, conserved                                                |
| PVX_090185 | 0         | 0         | 0         | 0         | 52.3516   | 0         | 0         | 0         | 124.814   | 115.59     | 0          | 0          | hypothetical protein, conserved                                                |
| PVX_090190 | 0         | 0         | 0         | 0         | 0         | 0         | 0         | 113.875   | 62.1293   | 28.7972    | 81.585     | 265.683    | hypothetical protein, conserved                                                |
| PVX_090195 | 0         | 0         | 0         | 134.189   | 0         | 0         | 0         | 0         | 79.9164   | 0          | 0          | 0          | AP-4 complex subunit sigma, putative                                           |
| PVX_090200 | 0         | 0         | 0         | 0         | 0         | 0         | 0         | 0         | 148.572   | 137.222    | 77.9049    | 0          | hypothetical protein, conserved                                                |
| PVX_090205 | 0         | 0         | 0         | 0         | 0         | 0         | 0         | 0         | 0         | 0          | 0          | 0          | hypothetical protein, conserved                                                |
| PVX_090210 | 0         | 0         | 0         | 0         | 0         | 0         | 0         | 0         | 0         | 0          | 0          | 0          | asparagine-rich protein (ARP)                                                  |
| PVX_090215 | 0         | 0         | 0         | 0         | 0         | 0         | 0         | 0         | 0         | 0          | 0          | 0          | glideosome associated protein with multiple membrane spans 2, putative (GAPM2) |
| PVX_090220 | 20.6503   | 100.878   | 51.3068   | 65.947    | 6.54542   | 0         | 0         | 0         | 15.645    | 43.5408    | 16.441     | 0          | hypothetical protein, conserved                                                |
| PVX_090225 | 134.222   | 0         | 0         | 0         | 0         | 0         | 0         | 0         | 0         | 0          | 53.439     | 0          | hypothetical protein, conserved                                                |
| PVX_090230 | 1295.44   | 775.297   | 1380.98   | 1183.36   | 606.744   | 315.761   | 1132.37   | 1970.61   | 1495.95   | 1668.85    | 1719.05    | 799.295    | early transcribed membrane protein (ETRAPM)                                    |
| PVX_090235 | 0         | 0         | 0         | 0         | 0         | 0         | 0         | 0         | 0         | 0          | 58.0887    | 0          | hypothetical protein                                                           |
| PVX_090240 | 0         | 0         | 0         | 0         | 0         | 0         | 0         | 0         | 0         | 0          | 0          | 0          | hypothetical protein, conserved                                                |
| PVX_090245 | 0         | 0         | 0         | 0         | 0         | 0         | 0         | 0         | 0         | 0          | 0          | 0          | Phist protein (PF-fam-b)                                                       |

| Gene ID    | Patient | Patient 1 | Patient 2 | Patient 3 | Patient 4 | Patient 5 | Patient 6 | Patient 7 | Patient 8 | Patient 9 | Patient 10 | Patient 11 | Patient 12 | Gene Description                                             |
|------------|---------|-----------|-----------|-----------|-----------|-----------|-----------|-----------|-----------|-----------|------------|------------|------------|--------------------------------------------------------------|
| PVX_090250 |         | 0         | 326.639   | 291.155   | 0         | 37.1309   | 0         | 0         | 324.818   | 88.6004   | 41.0496    | 93.0584    | 0          | tryptophan-rich antigen (Pv-fam-a)                           |
| PVX_090255 |         | 364.625   | 636.724   | 226.932   | 0         | 144.717   | 467.017   | 279.148   | 253.29    | 310.927   | 128.089    | 254.036    | 0          | tryptophan-rich antigen (Pv-fam-a)                           |
| PVX_090260 |         | 106.825   | 0         | 0         | 0         | 0         | 0         | 0         | 0         | 0         | 0          | 0          | 0          | tryptophan-rich antigen (Pv-fam-a)                           |
| PVX_090265 |         | 317.703   | 332.821   | 0         | 0         | 50.4228   | 813.55    | 121.567   | 110.335   | 60.1984   | 167.418    | 15.8101    | 0          | tryptophan-rich antigen (Pv-fam-a)                           |
| PVX_090270 |         | 0         | 58.6485   | 209.004   | 0         | 0         | 0         | 0         | 0         | 0         | 0          | 0          | 0          | tryptophan-rich antigen (Pv-fam-a)                           |
| PVX_090275 |         | 0         | 108.908   | 0         | 0         | 24.7492   | 0         | 0         | 0         | 29.5482   | 0          | 0          | 0          | tryptophan-rich antigen (Pv-fam-a)                           |
| PVX_090280 |         | 85.6595   | 0         | 0         | 0         | 0         | 0         | 0         | 0         | 32.463    | 0          | 0          | 138.832    | PST-A protein                                                |
| PVX_090285 |         | 0         | 0         | 0         | 0         | 0         | 0         | 0         | 43.4975   | 0         | 11.0081    | 6.2354     | 0          | Pvstp1, putative                                             |
| PVX_090290 |         | 0         | 0         | 0         | 0         | 0         | 0         | 0         | 0         | 0         | 0          | 7.32823    | 0          | variable surface protein Vir12, putative,PIR protein         |
| PVX_090293 |         | 0         | 77.9878   | 0         | 0         | 0         | 0         | 0         | 0         | 0         | 0          | 0          | 0          | VIR protein, pseudogene,PIR protein, pseudogene              |
| PVX_090295 |         | 0         | 0         | 0         | 0         | 0         | 0         | 0         | 0         | 0         | 0          | 0          | 0          | VIR protein,PIR protein                                      |
| PVX_090300 |         | 0         | 0         | 0         | 0         | 0         | 0         | 0         | 0         | 0         | 73.4693    | 0          | 0          | Plasmodium exported protein, unknown function                |
| PVX_090305 |         | 75.4736   | 52.7074   | 0         | 0         | 0         | 0         | 0         | 0         | 57.2015   | 26.5152    | 15.0234    | 0          | variable surface protein Vir12-related,PIR protein           |
| PVX_090310 |         | 0         | 0         | 0         | 0         | 0         | 0         | 0         | 0         | 0         | 0          | 0          | 0          | VIR protein,PIR protein                                      |
| PVX_090315 |         | 0         | 49.5691   | 0         | 0         | 0         | 0         | 0         | 0         | 0         | 0          | 0          | 0          | variable surface protein Vir12-like,PIR protein              |
| PVX_090320 |         | 0         | 0         | 0         | 0         | 0         | 0         | 0         | 0         | 0         | 0          | 18.7175    | 0          | VIR protein, pseudogene,PIR protein                          |
| PVX_090325 |         | 0         | 7.54933   | 0         | 0         | 0         | 0         | 0         | 0         | 0         | 0          | 0          | 4.30684    | reticulocyte binding protein 2c (RBP2c)                      |
| PVX_090330 |         | 0         | 0         | 0         | 0         | 0         | 0         | 0         | 0         | 0         | 0          | 0          | 0          | reticulocyte binding protein 2 precursor (PvRBP-2), putative |
| PVX_090335 |         | 78.8657   | 0         | 0         | 0         | 0         | 0         | 0         | 0         | 0         | 0          | 0          | 0          | variable surface protein Vir12-like,PIR protein              |
| PVX_090830 |         | 130.124   | 0         | 0         | 0         | 0         | 0         | 0         | 0         | 0         | 49.3289    | 0          | 0          | hypothetical protein                                         |
| PVX_090835 |         | 0         | 0         | 0         | 0         | 0         | 0         | 0         | 0         | 0         | 0          | 0          | 0          | hypothetical protein                                         |
| PVX_090840 |         | 0         | 0         | 0         | 0         | 0         | 0         | 0         | 0         | 0         | 0          | 0          | 0          | hypothetical protein                                         |
| PVX_090845 |         | 622.377   | 507.265   | 0         | 1660.18   | 98.8368   | 0         | 1112.22   | 432.393   | 825.636   | 728.735    | 392.323    | 336.408    | 60S acidic ribosomal protein P1, putative                    |
| PVX_090847 |         | 0         | 0         | 0         | 0         | 0         | 0         | 0         | 0         | 0         | 0          | 0          | 0          | tRNA Glycine                                                 |
| PVX_090848 |         | 0         | 0         | 0         | 0         | 0         | 0         | 0         | 0         | 0         | 0          | 0          | 0          | tRNA Leucine                                                 |
| PVX_090850 |         | 0         | 0         | 0         | 0         | 0         | 0         | 0         | 32.9691   | 0         | 25.0338    | 18.9058    | 0          | FeS cluster assembly protein SufD, putative (SufD)           |
| PVX_090860 |         | 0         | 0         | 0         | 0         | 0         | 0         | 0         | 0         | 0         | 0          | 0          | 0          | CPW-WPC family protein, putative                             |
| PVX_090865 |         | 0         | 37.1961   | 0         | 0         | 16.9006   | 0         | 0         | 0         | 40.373    | 131.036    | 63.629     | 86.2706    | actin, putative                                              |
| PVX_090870 |         | 107.386   | 74.9728   | 0         | 0         | 0         | 274.775   | 0         | 149.139   | 122.064   | 150.923    | 117.563    | 86.9444    | casein kinase II beta chain, putative                        |
| PVX_090876 |         | 26.5697   | 6.17973   | 0         | 28.2742   | 11.2256   | 0         | 0         | 0         | 13.4187   | 24.9       | 21.1534    | 0          | CCR4-NOT transcription complex subunit 1, putative           |
| PVX_090878 |         | 0         | 2923.75   | 0         | 0         | 0         | 0         | 0         | 0         | 0         | 0          | 0          | 0          | hypothetical protein, conserved                              |
| PVX_090880 |         | 118.622   | 41.3959   | 0         | 0         | 18.8037   | 0         | 45.3183   | 82.3524   | 44.9379   | 41.6837    | 70.8327    | 47.9884    | phenylalanyl-tRNA synthetase beta chain, putative            |
| PVX_090885 |         | 0         | 0         | 0         | 0         | 32.088    | 0         | 0         | 0         | 76.5888   | 70.9822    | 60.337     | 0          | hypothetical protein, conserved                              |
| PVX_090890 |         | 22.3915   | 15.6266   | 0         | 71.5111   | 0         | 114.481   | 0         | 31.0879   | 0         | 15.7372    | 13.3705    | 0          | helicase, putative,PSNF2L, putative                          |
| PVX_090895 |         | 0         | 0         | 0         | 0         | 0         | 0         | 0         | 0         | 0         | 10.4278    | 11.8133    | 0          | hypothetical protein, conserved                              |
| PVX_090900 |         | 319.096   | 111.389   | 661.279   | 1019.97   | 50.6113   | 0         | 406.66    | 369.3     | 241.806   | 224.232    | 264.648    | 258.35     | hypothetical protein, conserved                              |
| PVX_090905 |         | 0         | 0         | 0         | 0         | 0         | 0         | 0         | 0         | 0         | 0          | 10.8108    | 0          | WD domain, G-beta repeat domain containing protein           |
| PVX_090910 |         | 0         | 0         | 0         | 0         | 0         | 0         | 0         | 0         | 0         | 0          | 0          | 0          | hypothetical protein, conserved                              |
| PVX_090915 |         | 500.302   | 0         | 0         | 0         | 0         | 1287.73   | 0         | 348.082   | 0         | 87.8053    | 149.415    | 0          | RNA polymerase Rpb7, N-terminal domain containing protein    |
| PVX_090920 |         | 0         | 0         | 0         | 0         | 0         | 0         | 0         | 0         | 32.2775   | 0          | 33.9075    | 138.037    | metabolite/drug transporter, putative                        |
| PVX_090925 |         | 0         | 0         | 0         | 0         | 0         | 0         | 0         | 0         | 0         | 0          | 0          | 0          | protein kinase domain containing protein                     |
| PVX_090930 |         | 0         | 0         | 0         | 0         | 102.886   | 0         | 0         | 0         | 0         | 339.162    | 64.1561    | 0          | histone H4, putative                                         |
| PVX_090935 |         | 257.344   | 360.279   | 0         | 0         | 246.134   | 0         | 396.132   | 0         | 390.571   | 180.654    | 461.14     | 419.114    | histone 2B                                                   |
| PVX_090940 |         | 0         | 0         | 0         | 0         | 0         | 0         | 0         | 0         | 0         | 0          | 0          | 0          | hypothetical protein, conserved                              |
| PVX_090945 |         | 0         | 0         | 0         | 0         | 0         | 0         | 0         | 0         | 0         | 0          | 0          | 28.5356    | hypothetical protein, conserved                              |
| PVX_090950 |         | 889.246   | 966.305   | 984.106   | 632.459   | 345.155   | 1518.96   | 605.289   | 1921.95   | 1423.03   | 1180.07    | 904.737    | 320.393    | 40S ribosomal protein S4, putative                           |
| PVX_090955 |         | 122.634   | 0         | 0         | 0         | 0         | 0         | 0         | 0         | 0         | 0          | 0          | 73.2374    | centrin-4, putative (CEN4)                                   |
| PVX_090960 |         | 0         | 179.595   | 91.3651   | 0         | 0         | 0         | 0         | 0         | 27.8505   | 51.6629    | 65.8457    | 0          | translocon component PTEX88, putative                        |
| PVX_090965 |         | 134.298   | 46.8889   | 0         | 0         | 42.6163   | 0         | 102.737   | 93.2694   | 203.558   | 235.916    | 173.76     | 0          | hypothetical protein, conserved                              |
| PVX_090970 |         | 171.47    | 199.531   | 0         | 0         | 0         | 0         | 0         | 0         | 21.6568   | 20.0819    | 91.0161    | 0          | hypothetical protein, conserved                              |
| PVX_090972 |         | 0         | 0         | 0         | 0         | 0         | 0         | 0         | 0         | 0         | 0          | 182.019    | 0          | conserved Plasmodium membrane protein, unknown function      |
| PVX_090975 |         | 186.606   | 130.295   | 0         | 0         | 19.7359   | 0         | 259.181   | 70.7079   | 43.7081   | 86.6694    | 0          | 0          | RuvB-like helicase 2, putative (RUVB2)                       |
| PVX_090980 |         | 0         | 0         | 0         | 480.764   | 23.8539   | 0         | 0         | 0         | 0         | 26.4039    | 14.9603    | 121.774    | 30S ribosomal protein S15, putative                          |
| PVX_090985 |         | 50.4542   | 0         | 0         | 483.783   | 16.0039   | 0         | 231.458   | 0         | 172.047   | 124.093    | 90.3851    | 0          | hypothetical protein, conserved                              |
| PVX_090990 |         | 0         | 0         | 0         | 0         | 0         | 0         | 0         | 0         | 19.1487   | 0          | 0          | 81.8308    | hypothetical protein, conserved                              |
| PVX_090995 |         | 0         | 0         | 0         | 0         | 0         | 0         | 0         | 0         | 0         | 0          | 0          | 49.1184    | hypothetical protein, conserved                              |
| PVX_091000 |         | 38.9123   | 0         | 0         | 62.1313   | 6.16672   | 0         | 29.7223   | 54.0234   | 7.37007   | 27.3487    | 19.3627    | 0          | hypothetical protein, conserved                              |
| PVX_091005 |         | 23.4475   | 0         | 0         | 0         | 22.2976   | 0         | 71.6486   | 97.6631   | 53.2936   | 32.9586    | 74.6722    | 37.9359    | DEAD/DEAH box helicase, putative                             |
| PVX_091010 |         | 29.1818   | 0         | 0         | 0         | 18.503    | 0         | 0         | 0         | 0         | 30.7633    | 23.2336    | 0          | hypothetical protein, conserved                              |
| PVX_091015 |         | 0         | 14.996    | 106.78    | 0         | 0         | 0         | 0         | 0         | 8.13997   | 15.1025    | 12.8311    | 0          | protein kinase, putative                                     |
| PVX_091020 |         | 0         | 0         | 0         | 0         | 0         | 0         | 0         | 0         | 0         | 0          | 0          | 0          | hypothetical protein, conserved                              |
| PVX_091025 |         | 494.599   | 0         | 0         | 0         | 0         | 0         | 0         | 0         | 375.938   | 693.586    | 394.026    | 0          | U6 snRNA-associated Sm-like protein Lsm4, putative           |

| Gene ID    | Patient 1 | Patient 2 | Patient 3 | Patient 4 | Patient 5 | Patient 6 | Patient 7 | Patient 8 | Patient 9 | Patient 10 | Patient 11 | Patient 12 | Gene Description                                                                 |
|------------|-----------|-----------|-----------|-----------|-----------|-----------|-----------|-----------|-----------|------------|------------|------------|----------------------------------------------------------------------------------|
| Patient    |           |           |           |           |           |           |           |           |           |            |            |            |                                                                                  |
| PVX_091030 | 127.438   | 118.612   | 0         | 0         | 13.4716   | 0         | 64.9413   | 117.978   | 48.2816   | 104.483    | 76.0978    | 68.7643    | nucleic acid binding protein, putative                                           |
| PVX_091035 | 0         | 0         | 0         | 0         | 0         | 0         | 161.702   | 73.4234   | 0         | 55.727     | 52.6169    | 0          | hypothetical protein, conserved                                                  |
| PVX_091040 | 54.9485   | 76.6804   | 77.9847   | 100.237   | 22.3859   | 80.2324   | 23.9747   | 65.3815   | 83.2523   | 63.45      | 101.556    | 38.084     | polyadenylate-binding protein-interacting protein 1, putative (PAIP1)            |
| PVX_091045 | 0         | 0         | 0         | 674.262   | 100.353   | 0         | 0         | 0         | 0         | 110.982    | 83.8581    | 0          | DNA repair protein RAD51, putative (RAD51)                                       |
| PVX_091050 | 0         | 99.0119   | 0         | 453.929   | 90.068    | 0         | 0         | 0         | 268.529   | 199.001    | 0          | 0          | prefoldin, putative                                                              |
| PVX_091055 | 29.8535   | 0         | 74.1917   | 0         | 0         | 0         | 0         | 41.451    | 0         | 0          | 11.8842    | 0          | hypothetical protein, conserved                                                  |
| PVX_091060 | 54.5108   | 38.0576   | 0         | 0         | 0         | 0         | 0         | 151.411   | 103.269   | 38.3051    | 43.4012    | 88.2704    | pescadillo N-terminus domain containing protein                                  |
| PVX_091065 | 0         | 0         | 37.7656   | 0         | 4.81801   | 77.7092   | 0         | 0         | 11.5172   | 16.0275    | 30.2588    | 0          | transcription factor with AP2 domain(s), putative (ApiAP2)                       |
| PVX_091075 | 0         | 0         | 0         | 0         | 0         | 0         | 0         | 0         | 0         | 0          | 0          | 0          | hypothetical protein, conserved                                                  |
| PVX_091080 | 45.5494   | 31.7974   | 0         | 145.564   | 0         | 0         | 0         | 63.2542   | 17.2574   | 48.014     | 63.4651    | 73.7405    | hypothetical protein, conserved                                                  |
| PVX_091085 | 0         | 0         | 0         | 0         | 0         | 0         | 0         | 0         | 0         | 0          | 7.13451    | 0          | hypothetical protein, conserved                                                  |
| PVX_091090 | 0         | 0         | 0         | 0         | 0         | 0         | 201.546   | 0         | 99.6731   | 138.515    | 26.1699    | 213.34     | D-tyrosyl-tRNA(Tyr) deacylase, putative                                          |
| PVX_091092 | 640.137   | 0         | 0         | 0         | 206.005   | 0         | 0         | 0         | 0         | 224.26     | 0          | 0          | pterin-4a-carbinolamine dehydratase, putative                                    |
| PVX_091095 | 111.205   | 194.242   | 0         | 0         | 35.3265   | 0         | 85.1906   | 231.795   | 189.683   | 117.184    | 121.753    | 0          | casein kinase 2, alpha subunit, putative                                         |
| PVX_091100 | 257.966   | 0         | 214.036   | 0         | 0         | 0         | 0         | 238.919   | 32.5878   | 90.6231    | 222.517    | 0          | succinyl-CoA synthetase alpha subunit, putative                                  |
| PVX_091105 | 746.552   | 104.271   | 185.766   | 238.774   | 189.555   | 0         | 114.248   | 311.109   | 311.195   | 340.96     | 564.696    | 241.918    | endoplasmic reticulum-resident calcium binding protein, putative (ERC)           |
| PVX_091110 | 123.716   | 86.3825   | 307.735   | 0         | 58.8797   | 316.636   | 0         | 70.3167   | 130.399   | 160.067    | 0          | 0          | DnaJ domain containing protein, heat shock protein DnaJ homologue Pfj2, putative |
| PVX_091115 | 0         | 0         | 0         | 0         | 0         | 0         | 0         | 0         | 136.05    | 0          | 0          | 0          | hypothetical protein, conserved                                                  |
| PVX_091120 | 0         | 51.111    | 0         | 0         | 0         | 0         | 0         | 0         | 0         | 25.7131    | 116.55     | 118.58     | hypothetical protein, conserved                                                  |
| PVX_091136 | 0         | 0         | 0         | 0         | 0         | 0         | 0         | 0         | 0         | 0          | 9.16827    | 37.2618    | hypothetical protein, conserved                                                  |
| PVX_091137 | 0         | 0         | 0         | 0         | 29.7637   | 0         | 0         | 0         | 0         | 0          | 0          | 0          | pre-mRNA splicing factor, putative                                               |
| PVX_091140 | 0         | 52.0181   | 0         | 119.051   | 47.2617   | 190.593   | 0         | 155.223   | 0         | 26.1863    | 29.6669    | 0          | hypothetical protein, conserved                                                  |
| PVX_091145 | 232.597   | 325.529   | 1162.72   | 747.25    | 444.658   | 1196.73   | 0         | 970.8     | 705.904   | 1388.06    | 833.563    | 378.545    | 60S ribosomal protein L36, putative                                              |
| PVX_091150 | 0         | 0         | 0         | 0         | 0         | 0         | 0         | 0         | 187.969   | 0          | 98.5065    | 0          | hypothetical protein                                                             |
| PVX_091155 | 0         | 0         | 0         | 0         | 0         | 0         | 0         | 0         | 0         | 0          | 18.8426    | 0          | hypothetical protein, conserved                                                  |
| PVX_091160 | 20.7077   | 28.9022   | 0         | 66.1302   | 13.1272   | 0         | 31.6354   | 57.4992   | 15.6884   | 36.3847    | 20.6083    | 0          | pre-mRNA-processing factor 6, putative                                           |
| PVX_091165 | 0         | 123.981   | 0         | 0         | 0         | 0         | 0         | 67.2349   | 62.2566   | 0          | 0          | 0          | hypothetical protein, conserved                                                  |
| PVX_091170 | 137.538   | 95.9817   | 48.816    | 0         | 37.366    | 100.448   | 60.0322   | 54.5573   | 89.3147   | 89.7615    | 109.502    | 63.5716    | asparagine-rich antigen, putative                                                |
| PVX_091175 | 30.3393   | 42.3506   | 0         | 0         | 9.61875   | 0         | 0         | 84.2514   | 34.4805   | 21.3222    | 36.2328    | 0          | vacuolar protein sorting-associated protein 35, putative (VPS35)                 |
| PVX_091180 | 0         | 0         | 0         | 0         | 0         | 0         | 0         | 0         | 47.0684   | 43.6109    | 74.152     | 0          | 50S ribosomal protein L11, putative                                              |
| PVX_091185 | 0         | 0         | 0         | 0         | 0         | 0         | 0         | 0         | 0         | 0          | 0          | 0          | actin, putative                                                                  |
| PVX_091190 | 0         | 0         | 0         | 0         | 0         | 0         | 0         | 0         | 0         | 0          | 0          | 0          | hypothetical protein, conserved                                                  |
| PVX_091195 | 0         | 0         | 0         | 200.269   | 0         | 0         | 0         | 173.997   | 23.7343   | 44.0139    | 24.936     | 0          | ES2 protein, putative                                                            |
| PVX_091200 | 0         | 47.5314   | 0         | 0         | 0         | 0         | 0         | 0         | 77.3797   | 23.9145    | 27.0984    | 0          | hypothetical protein, conserved                                                  |
| PVX_091205 | 105.69    | 0         | 0         | 1014.99   | 0         | 0         | 0         | 587.429   | 120.178   | 111.375    | 63.1164    | 0          | replication factor C subunit 5, putative                                         |
| PVX_091210 | 0         | 0         | 0         | 0         | 0         | 0         | 0         | 81.0393   | 44.2177   | 0          | 46.4576    | 0          | hypothetical protein, conserved                                                  |
| PVX_091215 | 0         | 0         | 0         | 0         | 0         | 0         | 0         | 0         | 94.9278   | 0          | 99.6994    | 0          | hypothetical protein, conserved                                                  |
| PVX_091220 | 0         | 0         | 0         | 790.69    | 0         | 0         | 0         | 0         | 0         | 86.3587    | 195.933    | 0          | hypothetical protein, conserved                                                  |
| PVX_091225 | 0         | 0         | 0         | 0         | 0         | 0         | 0         | 0         | 0         | 0          | 0          | 0          | acylphosphatase, putative                                                        |
| PVX_091230 | 0         | 0         | 0         | 0         | 0         | 0         | 0         | 0         | 0         | 0          | 0          | 0          | endonuclease/exonuclease/phosphatase domain containing protein                   |
| PVX_091235 | 0         | 28.2829   | 0         | 0         | 12.8489   | 0         | 0         | 0         | 30.7009   | 0          | 16.1297    | 65.5851    | hypothetical protein, conserved                                                  |
| PVX_091240 | 0         | 57.9948   | 413.342   | 0         | 0         | 425.315   | 0         | 346.065   | 31.4684   | 0          | 99.1739    | 0          | peptidyl-prolyl cis-trans isomerase, putative                                    |
| PVX_091245 | 0         | 0         | 0         | 0         | 0         | 0         | 0         | 0         | 0         | 43.9767    | 0          | 0          | hypothetical protein, conserved                                                  |
| PVX_091250 | 0         | 0         | 0         | 0         | 0         | 0         | 0         | 0         | 227.681   | 209.776    | 119.25     | 0          | hypothetical protein, conserved                                                  |
| PVX_091255 | 0         | 0         | 0         | 0         | 0         | 0         | 0         | 0         | 0         | 0          | 12.5093    | 0          | hypothetical protein, conserved                                                  |
| PVX_091260 | 0         | 72.2986   | 0         | 0         | 0         | 0         | 0         | 0         | 0         | 36.3525    | 61.8025    | 167.814    | ubiquinone biosynthesis protein COQ4, putative (COQ4)                            |
| PVX_091265 | 34.8392   | 0         | 0         | 0         | 33.1399   | 0         | 0         | 0         | 26.3973   | 12.2421    | 48.5417    | 0          | hypothetical protein, conserved                                                  |
| PVX_091270 | 0         | 0         | 0         | 0         | 0         | 0         | 0         | 0         | 183.647   | 84.9591    | 192.753    | 0          | hypothetical protein, conserved                                                  |
| PVX_091275 | 251.208   | 175.451   | 208.416   | 535.773   | 53.1648   | 0         | 128.182   | 232.655   | 253.869   | 117.667    | 200.018    | 135.707    | hypothetical protein, conserved                                                  |
| PVX_091280 | 0         | 31.2249   | 0         | 0         | 28.3722   | 0         | 0         | 0         | 16.9468   | 15.7168    | 44.5165    | 0          | hypothetical protein, conserved                                                  |
| PVX_091285 | 0         | 0         | 0         | 0         | 0         | 0         | 0         | 39.0287   | 10.6486   | 0          | 27.9747    | 0          | hypothetical protein, conserved                                                  |
| PVX_091290 | 0         | 0         | 0         | 27.8351   | 0         | 0         | 0         | 0         | 0         | 0          | 34.9042    | 0          | hypothetical protein, conserved                                                  |
| PVX_091295 | 0         | 0         | 0         | 0         | 0         | 0         | 0         | 0         | 0         | 0          | 20.0444    | 0          | hypothetical protein, conserved                                                  |
| PVX_091300 | 0         | 0         | 0         | 0         | 0         | 0         | 0         | 0         | 0         | 0          | 1.07267    | 0          | hypothetical protein, conserved                                                  |
| PVX_091305 | 0         | 0         | 0         | 0         | 0         | 0         | 0         | 232.681   | 63.4587   | 58.7669    | 0          | 0          | protein tyrosine phosphatase, putative (PRL)                                     |
| PVX_091307 | 0         | 0         | 0         | 1714.75   | 0         | 0         | 821.881   | 0         | 0         | 0          | 0          | 0          | conserved Plasmodium protein, unknown function                                   |
| PVX_091310 | 107.596   | 0         | 535.963   | 0         | 0         | 0         | 0         | 0         | 40.7824   | 75.5881    | 235.601    | 174.492    | UDP-galactose transporter, putative                                              |
| PVX_091315 | 67.1491   | 46.8889   | 0         | 0         | 127.849   | 0         | 0         | 186.539   | 279.892   | 212.324    | 200.493    | 0          | ubiquitin domain-containing protein DSK2, putative (DSK2)                        |
| PVX_091320 | 0         | 0         | 0         | 0         | 29.2806   | 0         | 0         | 64.1028   | 52.4667   | 32.4385    | 82.6923    | 0          | hypothetical protein, conserved                                                  |
| PVX_091325 | 0         | 0         | 0         | 0         | 0         | 0         | 0         | 0         | 36.0925   | 0          | 37.913     | 0          | hypothetical protein, conserved                                                  |
| PVX_091330 | 146.26    | 51.0692   | 545.891   | 0         | 69.6284   | 0         | 111.909   | 203.166   | 193.986   | 205.537    | 145.568    | 0          | glyoxalase I, putative                                                           |
| PVX_091335 | 43.9824   | 0         | 0         | 0         | 0         | 0         | 0         | 0         | 0         | 15.4542    | 26.2636    | 0          | hypothetical protein, conserved                                                  |

| Gene ID    | Patient 1 | Patient 2 | Patient 3 | Patient 4 | Patient 5 | Patient 6 | Patient 7 | Patient 8 | Patient 9 | Patient 10 | Patient 11 | Patient 12 | Gene Description                                                                                       |
|------------|-----------|-----------|-----------|-----------|-----------|-----------|-----------|-----------|-----------|------------|------------|------------|--------------------------------------------------------------------------------------------------------|
| Patient    |           |           |           |           |           |           |           |           |           |            |            |            |                                                                                                        |
| PVX_091340 | 0         | 0         | 0         | 0         | 0         | 0         | 0         | 0         | 0         | 41.2435    | 35.0489    | 0          | mitogen-activated protein kinase 2, putative                                                           |
| PVX_091345 | 0         | 0         | 0         | 0         | 0         | 0         | 0         | 0         | 0         | 0          | 0          | 0          | dynein light chain type 2, putative                                                                    |
| PVX_091350 | 0         | 0         | 0         | 0         | 0         | 0         | 0         | 0         | 0         | 0          | 0          | 33.4616    | rhomboid protease ROM1, putative (ROM1)                                                                |
| PVX_091355 | 61.8579   | 43.1912   | 0         | 0         | 19.6266   | 0         | 94.6254   | 0         | 46.8778   | 65.1997    | 36.9386    | 0          | hypothetical protein, conserved                                                                        |
| PVX_091360 | 0         | 67.8077   | 0         | 0         | 0         | 0         | 0         | 0         | 55.2009   | 34.128     | 9.66673    | 0          | hypothetical protein, conserved                                                                        |
| PVX_091365 | 0         | 0         | 0         | 0         | 0         | 0         | 0         | 0         | 0         | 0          | 0          | 118.58     | hypothetical protein, conserved                                                                        |
| PVX_091370 | 0         | 0         | 0         | 0         | 0         | 0         | 0         | 0         | 0         | 0          | 0          | 0          | hypothetical protein, conserved                                                                        |
| PVX_091375 | 87.8784   | 92.0181   | 0         | 0         | 13.9351   | 224.793   | 0         | 0         | 99.883    | 123.512    | 96.2052    | 142.261    | serine/threonine-protein kinase PRP4K, putative (CLK3)                                                 |
| PVX_091380 | 0         | 0         | 0         | 0         | 0         | 0         | 0         | 0         | 0         | 0          | 0          | 36.2909    | glycerol-3-phosphate dehydrogenase, putative (G3PDH)                                                   |
| PVX_091385 | 0         | 0         | 0         | 0         | 0         | 0         | 0         | 0         | 0         | 0          | 0          | 9.89484    | hypothetical protein, conserved                                                                        |
| PVX_091390 | 155.166   | 0         | 0         | 497.406   | 98.6897   | 0         | 0         | 0         | 0         | 163.472    | 123.559    | 0          | hypothetical protein, conserved                                                                        |
| PVX_091395 | 0         | 0         | 0         | 0         | 0         | 0         | 0         | 0         | 0         | 0          | 0          | 0          | hypothetical protein                                                                                   |
| PVX_091400 | 0         | 0         | 0         | 0         | 0         | 0         | 0         | 0         | 0         | 0          | 0          | 0          | SET domain protein, putative (SET7)                                                                    |
| PVX_091405 | 214.483   | 99.8516   | 0         | 0         | 45.3788   | 0         | 0         | 0         | 108.368   | 75.3529    | 71.1558    | 0          | vivapain-2                                                                                             |
| PVX_091410 | 139.316   | 291.854   | 0         | 222.76    | 66.3168   | 356.645   | 106.584   | 96.7564   | 211.167   | 146.836    | 124.79     | 0          | vivapain-3 (VP3)                                                                                       |
| PVX_091415 | 141.968   | 198.276   | 0         | 0         | 67.5814   | 1090.35   | 108.617   | 197.199   | 134.493   | 274.322    | 127.166    | 114.999    | vivapain-2                                                                                             |
| PVX_091420 | 0         | 0         | 0         | 0         | 0         | 0         | 0         | 0         | 0         | 120.923    | 34.2782    | 0          | transcription factor with AP2 domain[s], putative (ApiAP2)                                             |
| PVX_091425 | 514.569   | 0         | 427.972   | 0         | 163.705   | 0         | 263.302   | 476.976   | 130.083   | 421.609    | 443.908    | 278.668    | peptidyl-prolyl cis-trans isomerase 11, putative                                                       |
| PVX_091430 | 0         | 0         | 0         | 0         | 0         | 0         | 0         | 0         | 0         | 0          | 26.1315    | 0          | palmitoyltransferase, putative (DHHC9)                                                                 |
| PVX_091434 | 0         | 0         | 0         | 0         | 0         | 0         | 0         | 0         | 16.3029   | 0          | 0          | 0          | rho try neck protein 4 (RON4)                                                                          |
| PVX_091436 | 21.4728   | 14.9852   | 0         | 0         | 27.225    | 0         | 0         | 29.8121   | 32.5364   | 22.6374    | 42.7395    | 69.4782    | hypothetical protein, conserved                                                                        |
| PVX_091440 | 0         | 0         | 0         | 0         | 0         | 0         | 301.007   | 0         | 222.93    | 343.963    | 117.022    | 0          | hypothetical protein, conserved                                                                        |
| PVX_091445 | 0         | 0         | 0         | 0         | 0         | 0         | 0         | 0         | 225.866   | 417.686    | 296.24     | 0          | cyclophilin, putative                                                                                  |
| PVX_091450 | 160.886   | 0         | 133.367   | 0         | 51.0365   | 274.445   | 82.0156   | 148.96    | 142.237   | 75.3711    | 128.097    | 0          | guanine nucleotide-exchange factor SEC12, putative (SEC12)                                             |
| PVX_091455 | 77.6342   | 0         | 0         | 496.647   | 0         | 0         | 0         | 0         | 0         | 27.2739    | 61.8139    | 0          | folate transporter 2, putative (FT2)                                                                   |
| PVX_091460 | 0         | 0         | 0         | 0         | 12.4102   | 0         | 0         | 0         | 44.4802   | 27.503     | 46.7383    | 0          | oligosaccharyl transferase STT3 subunit, putative                                                      |
| PVX_091465 | 143.591   | 66.8279   | 0         | 0         | 0         | 244.9     | 0         | 0         | 54.4035   | 33.6353    | 66.6899    | 0          | dipeptidyl aminopeptidase 1, putative (DPAP1)                                                          |
| PVX_091470 | 0         | 99.3593   | 0         | 0         | 45.1362   | 364.039   | 0         | 0         | 26.9643   | 125.049    | 56.6675    | 0          | heat shock protein 101, putative (HSP101)                                                              |
| PVX_091475 | 0         | 0         | 0         | 0         | 0         | 0         | 0         | 0         | 0         | 0          | 0          | 0          | hypothetical protein                                                                                   |
| PVX_091480 | 30.6195   | 0         | 0         | 97.8112   | 38.8307   | 0         | 0         | 0         | 11.5997   | 53.7979    | 79.2297    | 0          | hypothetical protein, conserved                                                                        |
| PVX_091485 | 95.6762   | 33.3961   | 118.947   | 152.888   | 15.1731   | 0         | 219.439   | 66.434    | 163.123   | 117.661    | 199.963    | 77.4507    | ubiquitin C-terminal hydrolase, family 1, putative                                                     |
| PVX_091490 | 0         | 0         | 0         | 0         | 0         | 0         | 0         | 27.6244   | 15.0745   | 0          | 31.6829    | 0          | hypothetical protein, conserved                                                                        |
| PVX_091495 | 1459.81   | 0         | 0         | 1574.56   | 468.043   | 0         | 0         | 0         | 554.759   | 511.799    | 290.738    | 797.646    | hypothetical protein, conserved                                                                        |
| PVX_091500 | 298.061   | 69.4054   | 0         | 317.99    | 0         | 0         | 0         | 276.089   | 188.281   | 69.8008    | 138.442    | 0          | hypothetical protein, conserved                                                                        |
| PVX_091505 | 67.1491   | 46.8889   | 0         | 0         | 21.3081   | 0         | 0         | 0         | 25.4447   | 70.7748    | 53.4647    | 0          | tyrosine-tRNA ligase, putative                                                                         |
| PVX_091510 | 0         | 0         | 0         | 0         | 0         | 0         | 0         | 0         | 0         | 0          | 60.0469    | 0          | immature colon carcinoma transcript 1, putative                                                        |
| PVX_091515 | 1012.92   | 566.832   | 0         | 650.281   | 0         | 0         | 0         | 1127.05   | 691.531   | 640.135    | 524.318    | 658.844    | GTP-binding nuclear protein RAN/TC4, putative                                                          |
| PVX_091520 | 0         | 0         | 0         | 0         | 0         | 0         | 0         | 0         | 0         | 0          | 0          | 0          | hypothetical protein                                                                                   |
| PVX_091525 | 34.8256   | 0         | 86.5606   | 0         | 0         | 0         | 0         | 0         | 0         | 0          | 41.591     | 56.3627    | DNA mismatch repair protein MLH, putative                                                              |
| PVX_091530 | 22.7675   | 0         | 0         | 0         | 0         | 0         | 0         | 31.61     | 8.62462   | 8.00072    | 4.53165    | 0          | hypothetical protein, conserved                                                                        |
| PVX_091535 | 0         | 0         | 0         | 0         | 0         | 0         | 0         | 0         | 0         | 79.1841    | 0          | 0          | hypothetical protein, conserved                                                                        |
| PVX_091540 | 0         | 785.167   | 0         | 0         | 0         | 0         | 0         | 0         | 170.27    | 0          | 44.6827    | 0          | AP-1 complex subunit sigma, putative                                                                   |
| PVX_091545 | 173.993   | 72.8671   | 0         | 0         | 66.2024   | 0         | 159.559   | 193.278   | 92.2827   | 73.3669    | 103.897    | 56.3188    | heat shock protein 90, putative                                                                        |
| PVX_091550 | 0         | 0         | 101.838   | 0         | 25.9837   | 0         | 62.6184   | 85.3598   | 46.5803   | 64.8177    | 85.6627    | 0          | hypothetical protein, conserved                                                                        |
| PVX_091555 | 0         | 0         | 0         | 0         | 0         | 0         | 387.104   | 0         | 47.866    | 0          | 75.4077    | 0          | haloacid dehalogenase-like hydrolase, putative                                                         |
| PVX_091560 | 204.235   | 106.938   | 0         | 0         | 97.175    | 0         | 156.157   | 70.9087   | 174.109   | 143.52     | 71.1419    | 82.6723    | nucleolar protein NOP56, putative, SIK1 protein, putative                                              |
| PVX_091565 | 53.0565   | 0         | 0         | 0         | 16.8304   | 0         | 0         | 147.369   | 20.1027   | 0          | 21.1216    | 0          | histone acetyltransferase, putative (MYST)                                                             |
| PVX_091570 | 0         | 0         | 0         | 0         | 0         | 0         | 0         | 0         | 0         | 0          | 0          | 0          | hypothetical protein, conserved                                                                        |
| PVX_091575 | 0         | 0         | 0         | 0         | 0         | 0         | 0         | 0         | 0         | 0          | 0          | 0          | WD domain, G-beta repeat domain containing protein                                                     |
| PVX_091580 | 0         | 0         | 0         | 0         | 0         | 0         | 0         | 0         | 0         | 0          | 0          | 0          | hypothetical protein, conserved                                                                        |
| PVX_091585 | 0         | 46.5047   | 0         | 212.961   | 42.2669   | 0         | 0         | 0         | 75.709    | 46.7971    | 66.2837    | 0          | acyl-CoA-binding protein, putative                                                                     |
| PVX_091590 | 0         | 39.2539   | 139.829   | 179.729   | 0         | 287.743   | 0         | 0         | 21.3029   | 0          | 22.3823    | 0          | tRNA methyltransferase, putative                                                                       |
| PVX_091595 | 0         | 191.17    | 0         | 0         | 0         | 0         | 0         | 0         | 0         | 95.8312    | 54.3655    | 0          | conserved protein, unknown function                                                                    |
| PVX_091600 | 119.682   | 334.514   | 0         | 0         | 38.0273   | 0         | 183.419   | 0         | 45.3675   | 126.111    | 95.2988    | 388.32     | splicing factor UZAF small subunit, putative (UZAF1)                                                   |
| PVX_091605 | 15.5027   | 10.8181   | 77.0235   | 99.0019   | 39.3055   | 0         | 23.6799   | 43.0444   | 105.702   | 103.512    | 160.453    | 25.0764    | ubiquitin-protein ligase, putative                                                                     |
| PVX_091610 | 145.075   | 50.6549   | 180.486   | 0         | 46.042    | 0         | 0         | 201.518   | 109.95    | 50.9679    | 158.827    | 0          | AP-4 complex subunit mu, putative                                                                      |
| PVX_091615 | 0         | 23.5737   | 0         | 0         | 32.126    | 0         | 51.6189   | 0         | 12.7951   | 23.7359    | 47.0577    | 54.6594    | ATP-dependent zinc metalloprotease FTSH, putative                                                      |
| PVX_091620 | 0         | 0         | 0         | 0         | 0         | 0         | 0         | 0         | 0         | 0          | 0          | 0          | hypothetical protein                                                                                   |
| PVX_091625 | 0         | 0         | 0         | 0         | 67.2536   | 0         | 0         | 0         | 80.1053   | 0          | 210.229    | 0          | alternative splicing factor ASF-1, putative                                                            |
| PVX_091630 | 0         | 13.4459   | 0         | 0         | 6.10695   | 0         | 0         | 0         | 7.29866   | 6.77095    | 15.3401    | 0          | hypothetical protein, conserved                                                                        |
| PVX_091635 | 32.917    | 114.876   | 0         | 0         | 0         | 0         | 50.3075   | 91.4121   | 112.233   | 57.8339    | 78.623     | 0          | hypothetical protein, conserved                                                                        |
| PVX_091640 | 1704.15   | 770.309   | 249.619   | 1925.08   | 477.537   | 0         | 1842.39   | 2228.53   | 2089.66   | 1866.29    | 1336.96    | 975.216    | 2,3-bisphosphoglycerate-dependent phosphoglycerate mutase, putative, phosphoglycerate mutase, putative |

| Gene ID    | Patient | Patient 1 | Patient 2 | Patient 3 | Patient 4 | Patient 5 | Patient 6 | Patient 7 | Patient 8 | Patient 9 | Patient 10 | Patient 11 | Patient 12 | Gene Description                                                                 |
|------------|---------|-----------|-----------|-----------|-----------|-----------|-----------|-----------|-----------|-----------|------------|------------|------------|----------------------------------------------------------------------------------|
| PVX_091645 |         | 0         | 0         | 0         | 0         | 0         | 0         | 0         | 0         | 0         | 0          | 0          | 0          | hypothetical protein, conserved                                                  |
| PVX_091650 |         | 0         | 0         | 0         | 0         | 0         | 0         | 0         | 0         | 0         | 0          | 44.6185    | 121.06     | RNA splicing protein MR52, mitochondrial precursor, putative                     |
| PVX_091652 |         | 99.3535   | 0         | 247.396   | 0         | 0         | 0         | 152.165   | 138.045   | 0         | 34.9004    | 59.3321    | 0          | hypothetical protein, conserved                                                  |
| PVX_091655 |         | 78.6839   | 54.9238   | 97.7985   | 251.41    | 12.4757   | 201.246   | 60.1391   | 54.6307   | 74.5248   | 82.944     | 93.9698    | 0          | rRNA nucleotidyltransferase, putative                                            |
| PVX_091660 |         | 0         | 0         | 0         | 0         | 0         | 0         | 0         | 0         | 0         | 0          | 3.72812    | 0          | hypothetical protein                                                             |
| PVX_091662 |         | 0         | 18.5186   | 0         | 0         | 0         | 0         | 0         | 0         | 0         | 0          | 5.28141    | 0          | hypothetical protein, conserved                                                  |
| PVX_091664 |         | 0         | 0         | 0         | 0         | 0         | 0         | 0         | 0         | 0         | 0          | 0          | 0          | conserved Plasmodium protein, unknown function                                   |
| PVX_091665 |         | 0         | 0         | 0         | 0         | 0         | 0         | 0         | 0         | 0         | 0          | 0          | 0          | heat shock factor-binding protein 1, putative (HSBP)                             |
| PVX_091670 |         | 0         | 93.8055   | 0         | 0         | 0         | 0         | 0         | 0         | 0         | 0          | 0          | 0          | palmitoyltransferase, putative (DHH3)                                            |
| PVX_091675 |         | 39.566    | 13.8057   | 49.1507   | 0         | 6.27037   | 0         | 0         | 0         | 0         | 13.9041    | 23.6256    | 0          | liver stage antigen, putative                                                    |
| PVX_091680 |         | 0         | 0         | 0         | 0         | 75.491    | 0         | 0         | 0         | 89.8757   | 0          | 0          | 0          | hypothetical protein, conserved                                                  |
| PVX_091685 |         | 0         | 0         | 0         | 0         | 0         | 0         | 0         | 0         | 0         | 0          | 0          | 0          | tyrosine kinase-like protein, putative (TKL2)                                    |
| PVX_091690 |         | 0         | 0         | 0         | 0         | 0         | 0         | 0         | 0         | 0         | 0          | 0          | 0          | WD domain, G-beta repeat domain containing protein                               |
| PVX_091695 |         | 0         | 0         | 0         | 0         | 0         | 0         | 0         | 0         | 0         | 0          | 25.5806    | 0          | hypothetical protein, conserved                                                  |
| PVX_091700 |         | 165.04    | 115.226   | 410.447   | 0         | 69.8079   | 563.085   | 84.1368   | 76.4039   | 187.6     | 135.304    | 153.305    | 0          | circumsporozoite-related antigen, putative (EXP1)                                |
| PVX_091705 |         | 138.924   | 24.2419   | 172.65    | 0         | 22.0246   | 0         | 53.0829   | 192.903   | 65.7883   | 85.4286    | 82.9559    | 56.2094    | ABC transporter, putative,ATP-binding cassette, sub-family F, member 2, putative |
| PVX_091710 |         | 0         | 0         | 0         | 0         | 0         | 0         | 0         | 0         | 0         | 0          | 0          | 0          | hypothetical protein, conserved                                                  |
| PVX_091715 |         | 0         | 42.1418   | 0         | 0         | 0         | 0         | 0         | 0         | 0         | 0          | 0          | 0          | 3-phosphoinositide dependent protein kinase-1, putative                          |
| PVX_091720 |         | 0         | 0         | 0         | 0         | 22.6894   | 0         | 0         | 0         | 0         | 50.2353    | 0          | 0          | conserved Plasmodium protein, unknown function                                   |
| PVX_091725 |         | 0         | 0         | 0         | 0         | 0         | 0         | 0         | 0         | 0         | 0          | 26.4348    | 0          | GPI transamidase component GPI16, putative (GPI16)                               |
| PVX_091730 |         | 44.6405   | 0         | 0         | 0         | 14.1578   | 0         | 0         | 0         | 0         | 47.0562    | 8.88553    | 0          | cupin-like protein, putative                                                     |
| PVX_091735 |         | 0         | 89.6057   | 0         | 0         | 0         | 0         | 0         | 0         | 0         | 22.5432    | 12.772     | 0          | hypothetical protein, conserved                                                  |
| PVX_091740 |         | 0         | 0         | 0         | 0         | 9.67125   | 0         | 0         | 0         | 11.5562   | 0          | 6.07174    | 0          | hypothetical protein, conserved                                                  |
| PVX_091745 |         | 16.2723   | 0         | 0         | 0         | 0         | 0         | 0         | 0         | 0         | 0          | 6.47762    | 0          | hypothetical protein, conserved                                                  |
| PVX_091750 |         | 0         | 0         | 0         | 0         | 0         | 0         | 0         | 0         | 0         | 0          | 13.2664    | 0          | hypothetical protein, conserved                                                  |
| PVX_091752 |         | 0         | 0         | 0         | 0         | 49.0885   | 0         | 0         | 0         | 58.5279   | 0          | 92.1898    | 0          | conserved Plasmodium protein, unknown function                                   |
| PVX_091755 |         | 0         | 0         | 0         | 0         | 0         | 0         | 26.8889   | 0         | 0         | 11.5648    | 62.6631    | 0          | calcium-dependent protein kinase 6, putative (CDPK6)                             |
| PVX_091760 |         | 0         | 0         | 0         | 0         | 1.7955    | 0         | 0         | 2.14638   | 1.99152   | 4.51154    | 0          | 0          | dynein heavy chain, putative                                                     |
| PVX_091765 |         | 0         | 39.9306   | 35.5371   | 45.6775   | 18.1349   | 0         | 0         | 0         | 16.2567   | 35.1918    | 19.9318    | 0          | hypothetical protein, conserved                                                  |
| PVX_091770 |         | 0         | 0         | 0         | 0         | 0         | 0         | 0         | 0         | 11.7569   | 10.9074    | 0          | 25.1025    | calcium-dependent protein kinase 7, putative (CDPK7)                             |
| PVX_091775 |         | 0         | 0         | 0         | 0         | 13.5101   | 0         | 0         | 0         | 0         | 0          | 16.9589    | 0          | leucine-rich repeat protein (LRR11)                                              |
| PVX_091780 |         | 105.737   | 184.551   | 131.473   | 168.989   | 33.5413   | 0         | 0         | 0         | 100.157   | 74.3027    | 52.6169    | 0          | RING zinc finger protein, putative                                               |
| PVX_091785 |         | 40.2986   | 168.78    | 0         | 128.765   | 12.7794   | 0         | 61.6033   | 0         | 137.407   | 113.281    | 104.276    | 0          | translation elongation factor EF-1, subunit alpha, putative                      |
| PVX_091790 |         | 26.0704   | 54.5845   | 0         | 0         | 0         | 0         | 0         | 0         | 19.7521   | 18.3225    | 57.08      | 42.1827    | hypothetical protein, conserved                                                  |
| PVX_091795 |         | 79.7711   | 55.683    | 99.1512   | 127.444   | 0         | 0         | 55.3858   | 45.3328   | 28.0299   | 63.5121    | 0          | 0          | hypothetical protein, conserved                                                  |
| PVX_091800 |         | 0         | 0         | 0         | 0         | 0         | 1806.73   | 540.231   | 0         | 0         | 0          | 0          | 0          | hypothetical protein, conserved                                                  |
| PVX_091805 |         | 51.914    | 0         | 0         | 0         | 0         | 0         | 39.6616   | 0         | 9.83307   | 27.3642    | 0          | 41.999     | SMC family, C-terminal domain containing protein                                 |
| PVX_091810 |         | 196.741   | 0         | 0         | 0         | 62.4789   | 0         | 0         | 0         | 74.5669   | 69.1106    | 97.9085    | 0          | ribosomal protein L7A, putative                                                  |
| PVX_091815 |         | 74.7175   | 208.715   | 0         | 0         | 0         | 0         | 103.79    | 0         | 26.2496   | 104.11     | 242.121    | 0          | endoplasmic reticulum oxidoreductin, putative                                    |
| PVX_091820 |         | 0         | 14.5555   | 0         | 0         | 6.61104   | 0         | 0         | 0         | 31.6036   | 14.659     | 16.6057    | 0          | hypothetical protein, conserved                                                  |
| PVX_091825 |         | 0         | 0         | 0         | 0         | 0         | 0         | 0         | 110.335   | 90.2976   | 27.903     | 31.6202    | 128.706    | hypothetical protein, conserved                                                  |
| PVX_091830 |         | 114.68    | 0         | 0         | 0         | 18.191    | 0         | 0         | 0         | 0         | 0          | 0          | 0          | hypothetical protein, conserved                                                  |
| PVX_091835 |         | 362.677   | 0         | 0         | 0         | 0         | 0         | 560.165   | 0         | 0         | 0          | 0          | 0          | LSM domain containing protein                                                    |
| PVX_091840 |         | 0         | 0         | 0         | 0         | 0         | 0         | 0         | 0         | 0         | 0          | 0          | 0          | pyruvate dehydrogenase E1 component subunit alpha, putative                      |
| PVX_091845 |         | 0         | 0         | 0         | 0         | 46.6097   | 0         | 0         | 0         | 27.826    | 77.3924    | 58.4662    | 0          | ethanolamine kinase, putative                                                    |
| PVX_091850 |         | 124.685   | 87.1295   | 0         | 0         | 0         | 0         | 173.284   | 141.796   | 0         | 0          | 148.924    | 0          | GrpE protein homolog, mitochondrial, putative (MGE1)                             |
| PVX_091855 |         | 127.71    | 0         | 0         | 0         | 40.5858   | 0         | 177.493   | 96.8259   | 134.564   | 25.4229    | 0          | 0          | ribosome biogenesis regulatory protein (RRS1), putative                          |
| PVX_091860 |         | 43.446    | 30.3197   | 53.9735   | 0         | 20.6568   | 0         | 33.1877   | 60.3191   | 65.8312   | 45.8023    | 112.418    | 175.72     | hypothetical protein                                                             |
| PVX_091865 |         | 628.291   | 549.04    | 0         | 503.544   | 349.674   | 806.319   | 482.018   | 436.73    | 714.674   | 606.757    | 719.196    | 1020.35    | 60S ribosomal protein L35, putative,15kD antigen, putative                       |
| PVX_091870 |         | 0         | 0         | 0         | 0         | 0         | 0         | 0         | 0         | 51.4243   | 0          | 0          | 0          | hypothetical protein, conserved                                                  |
| PVX_091875 |         | 69.9847   | 0         | 0         | 0         | 66.6285   | 0         | 0         | 0         | 106.079   | 24.5875    | 111.445    | 113.377    | hypothetical protein, conserved                                                  |
| PVX_091880 |         | 332.839   | 0         | 0         | 0         | 0         | 0         | 0         | 0         | 116.879   | 33.1305    | 0          | 0          | hypothetical protein, conserved                                                  |
| PVX_091885 |         | 23.5215   | 16.4154   | 0         | 75.1221   | 22.368    | 0         | 0         | 65.3142   | 62.372    | 24.7969    | 23.4086    | 38.0556    | DNA-dependent RNA polymerase, putative                                           |
| PVX_091890 |         | 50.8556   | 71.008    | 0         | 0         | 0         | 0         | 0         | 0         | 57.8054   | 0          | 50.6135    | 82.343     | mitochondrial import inner membrane translocase subunit TIM44, putative (TIM44)  |
| PVX_091895 |         | 0         | 0         | 0         | 0         | 40.5278   | 0         | 0         | 0         | 145.032   | 0          | 76.16      | 0          | small nuclear ribonucleoprotein Sm D1, putative                                  |
| PVX_091900 |         | 0         | 0         | 0         | 0         | 0         | 0         | 0         | 0         | 0         | 512.454    | 0          | 0          | hypothetical protein                                                             |
| PVX_091905 |         | 0         | 0         | 0         | 0         | 18.1561   | 0         | 0         | 0         | 0         | 0          | 11.3916    | 92.6804    | kelch domain-containing protein                                                  |
| PVX_091910 |         | 0         | 0         | 0         | 0         | 0         | 0         | 0         | 0         | 0         | 0          | 11.8936    | 0          | kelch domain-containing protein                                                  |
| PVX_091915 |         | 174.875   | 244.562   | 0         | 0         | 0         | 0         | 0         | 0         | 265.256   | 184.217    | 104.442    | 0          | hypothetical protein, conserved                                                  |
| PVX_091920 |         | 35.2926   | 123.17    | 175.445   | 338.261   | 67.1431   | 180.51    | 53.9421   | 245.029   | 120.334   | 62.0069    | 168.595    | 0          | threonine-tRNA ligase, putative                                                  |
| PVX_091922 |         | 0         | 0         | 0         | 0         | 16.457    | 0         | 0         | 72.0789   | 0         | 9.1214     | 15.4996    | 0          | autophagy-related protein 7, putative (ATG7)                                     |
| PVX_091925 |         | 836.703   | 1754.39   | 1390.53   | 2234.14   | 354.639   | 715.478   | 1710.79   | 775.331   | 1480.31   | 1175.41    | 1082.66    | 905.424    | 40S ribosomal protein S18, putative                                              |

| Gene ID    | Patient | Patient 1 | Patient 2 | Patient 3 | Patient 4 | Patient 5 | Patient 6 | Patient 7 | Patient 8 | Patient 9 | Patient 10 | Patient 11 | Patient 12 | Gene Description                                                                 |
|------------|---------|-----------|-----------|-----------|-----------|-----------|-----------|-----------|-----------|-----------|------------|------------|------------|----------------------------------------------------------------------------------|
| PVX_091930 |         | 0         | 31.1626   | 0         | 0         | 0         | 0         | 0         | 61.9915   | 0         | 0          | 0          | 0          | Dnaj domain containing protein                                                   |
| PVX_091935 |         | 0         | 64.3284   | 229.274   | 589.392   | 0         | 0         | 0         | 104.71    | 32.3516   | 54.9966    | 0          | 0          | hypothetical protein, conserved                                                  |
| PVX_091940 |         | 59.9453   | 97.6108   | 0         | 0         | 12.6668   | 0         | 0         | 55.4832   | 22.7076   | 56.1751    | 47.726     | 32.3255    | hypothetical protein, conserved                                                  |
| PVX_091945 |         | 0         | 0         | 0         | 0         | 0         | 0         | 0         | 0         | 0         | 0          | 0          | 0          | hypothetical protein, conserved                                                  |
| PVX_091950 |         | 0         | 0         | 0         | 0         | 10.7574   | 0         | 0         | 0         | 0         | 0          | 20.2594    | 0          | hypothetical protein, conserved                                                  |
| PVX_091955 |         | 0         | 0         | 0         | 0         | 0         | 0         | 0         | 41.7856   | 0         | 0          | 11.9801    | 0          | RNA-binding protein, putative                                                    |
| PVX_091960 |         | 0         | 935.91    | 0         | 0         | 862.511   | 0         | 0         | 0         | 0         | 0          | 0          | 0          | U6 snRNA-associated 5m-like protein LSM6, putative                               |
| PVX_091965 |         | 138.587   | 193.723   | 0         | 0         | 0         | 711.027   | 0         | 0         | 210.161   | 97.3449    | 137.943    | 0          | hypothetical protein, conserved                                                  |
| PVX_091970 |         | 119.682   | 83.6284   | 298.187   | 0         | 76.0546   | 0         | 0         | 498.97    | 45.3675   | 126.111    | 238.247    | 194.16     | deoxyuridine 5'-triphosphate nucleotidohydrolase, putative                       |
| PVX_091975 |         | 0         | 0         | 0         | 0         | 211.924   | 0         | 511.895   | 0         | 0         | 0          | 0          | 0          | hypothetical protein, conserved                                                  |
| PVX_091980 |         | 0         | 131.088   | 0         | 0         | 0         | 0         | 0         | 0         | 35.5623   | 32.9619    | 37.3564    | 0          | tRNA (guanine-N(7))-methyltransferase, putative                                  |
| PVX_091985 |         | 0         | 0         | 0         | 0         | 0         | 0         | 0         | 0         | 34.2334   | 63.463     | 17.9806    | 0          | hypothetical protein, conserved                                                  |
| PVX_091990 |         | 83.5016   | 0         | 207.831   | 0         | 26.5078   | 0         | 0         | 0         | 31.6447   | 0          | 49.8646    | 0          | hypothetical protein, conserved                                                  |
| PVX_091992 |         | 0         | 0         | 0         | 422.38    | 0         | 0         | 0         | 0         | 99.9671   | 46.3076    | 209.976    | 0          | hypothetical protein                                                             |
| PVX_091995 |         | 0         | 0         | 0         | 0         | 0         | 0         | 0         | 0         | 0         | 0          | 0          | 0          | hypothetical protein                                                             |
| PVX_092000 |         | 61.7089   | 100.483   | 0         | 0         | 6.51983   | 0         | 0         | 0         | 38.9596   | 7.22845    | 40.9418    | 0          | hypothetical protein, conserved                                                  |
| PVX_092005 |         | 0         | 0         | 0         | 0         | 0         | 0         | 0         | 0         | 31.4684   | 0          | 0          | 0          | hypothetical protein, conserved                                                  |
| PVX_092010 |         | 0         | 28.3953   | 33.6943   | 43.3089   | 4.29863   | 0         | 0         | 37.6613   | 15.4139   | 14.3005    | 24.2982    | 0          | hypothetical protein, conserved                                                  |
| PVX_092015 |         | 0         | 0         | 0         | 0         | 0         | 0         | 0         | 0         | 0         | 0          | 0          | 0          | conserved Plasmodium protein, unknown function                                   |
| PVX_092025 |         | 330.993   | 115.709   | 825.729   | 0         | 52.6432   | 0         | 0         | 230.095   | 62.7537   | 0          | 230.627    | 0          | prefoldin subunit 5, putative                                                    |
| PVX_092030 |         | 0         | 0         | 0         | 0         | 0         | 2229.24   | 0         | 1200.73   | 0         | 302.079    | 171.542    | 0          | multi-protein bridging factor type 1, putative                                   |
| PVX_092035 |         | 0         | 0         | 0         | 0         | 6.88058   | 0         | 0         | 0         | 8.22291   | 0          | 4.3206     | 0          | 6-phosphofructokinase, putative                                                  |
| PVX_092040 |         | 96.775    | 67.6019   | 0         | 0         | 0         | 495.887   | 148.204   | 268.917   | 110.035   | 33.9951    | 77.0561    | 0          | geranylgeranyl pyrophosphate synthase (GGPPS)                                    |
| PVX_092045 |         | 38.9991   | 27.2224   | 0         | 0         | 37.1006   | 199.49    | 0         | 0         | 14.775    | 13.7035    | 54.338     | 0          | hypothetical protein, conserved                                                  |
| PVX_092050 |         | 0         | 0         | 0         | 0         | 0         | 0         | 0         | 0         | 21.8946   | 0          | 23.0038    | 0          | hypothetical protein, conserved                                                  |
| PVX_092055 |         | 0         | 0         | 0         | 0         | 0         | 0         | 0         | 0         | 0         | 0          | 27.2018    | 0          | GPI8p transamidase, putative                                                     |
| PVX_092060 |         | 0         | 0         | 0         | 0         | 0         | 0         | 0         | 0         | 0         | 0          | 0          | 0          | hypothetical protein, conserved                                                  |
| PVX_092065 |         | 259.823   | 90.7123   | 161.587   | 0         | 61.8332   | 0         | 397.497   | 451.105   | 344.586   | 365.141    | 349.098    | 0          | spermidine synthase, putative                                                    |
| PVX_092070 |         | 578.587   | 565.555   | 431.71    | 369.932   | 201.915   | 592.259   | 176.993   | 482.147   | 350.767   | 487.885    | 368.537    | 93.7007    | parasitophorous vacuolar protein 1, putative (PV1)                               |
| PVX_092075 |         | 449.431   | 52.31     | 186.39    | 239.575   | 118.869   | 0         | 0         | 312.151   | 141.926   | 131.578    | 208.743    | 0          | 26S proteasome regulatory subunit RPN7, putative (RPN7)                          |
| PVX_092080 |         | 0         | 0         | 0         | 0         | 0         | 0         | 0         | 0         | 0         | 0          | 0          | 0          | hypothetical protein, conserved                                                  |
| PVX_092085 |         | 163.234   | 75.9763   | 0         | 173.928   | 0         | 0         | 0         | 75.5673   | 0         | 57.3529    | 75.8136    | 0          | proliferating-cell nuclear antigen p120, putative                                |
| PVX_092090 |         | 0         | 31.5563   | 0         | 0         | 14.3368   | 0         | 0         | 0         | 17.1266   | 15.8834    | 44.9887    | 0          | A/G-specific adenine glycosylase, putative                                       |
| PVX_092095 |         | 0         | 0         | 79.0195   | 0         | 0         | 0         | 0         | 0         | 12.0449   | 0          | 0          | 0          | phosphatidylinositol-4-phosphate 5-kinase, putative                              |
| PVX_092100 |         | 0         | 93.8055   | 0         | 0         | 0         | 0         | 0         | 0         | 0         | 0          | 53.439     | 0          | hypothetical protein, conserved                                                  |
| PVX_092105 |         | 59.1591   | 123.916   | 0         | 189.13    | 37.5381   | 0         | 0         | 0         | 44.8317   | 62.3559    | 105.981    | 0          | transporter, putative                                                            |
| PVX_092110 |         | 123.396   | 0         | 0         | 0         | 39.1319   | 0         | 0         | 0         | 93.5001   | 28.9058    | 81.8715    | 0          | phosphoacetylglucosamine mutase, putative                                        |
| PVX_092115 |         | 2108.81   | 3726.75   | 2694.8    | 0         | 0         | 0         | 1663.3    | 4434.88   | 2815.13   | 2949.53    | 2942.02    | 1754.68    | 60S ribosomal protein L38, putative (RPL38)                                      |
| PVX_092120 |         | 853.328   | 1251.6    | 424.8     | 1911.05   | 216.723   | 437.106   | 522.532   | 1066.93   | 549.765   | 959.276    | 713.416    | 138.301    | 60S acidic ribosomal protein P0, putative, ribosomal phosphoprotein P0, putative |
| PVX_092125 |         | 159.417   | 0         | 0         | 254.973   | 25.3014   | 0         | 366.004   | 0         | 151.032   | 168.014    | 269.729    | 0          | 26S protease regulatory subunit 6a, putative (RPT5)                              |
| PVX_092130 |         | 0         | 0         | 0         | 0         | 0         | 0         | 41.1489   | 0         | 0         | 10.414     | 17.6964    | 0          | hypothetical protein, conserved                                                  |
| PVX_092135 |         | 0         | 0         | 93.0094   | 0         | 0         | 0         | 0         | 0         | 42.5269   | 0          | 22.3432    | 0          | hypothetical protein, conserved                                                  |
| PVX_092140 |         | 19.2925   | 13.4633   | 47.9315   | 0         | 0         | 0         | 0         | 7.3081    | 6.77971   | 34.5598    | 31.2099    | 0          | structural maintenance of chromosome protein, putative                           |
| PVX_092145 |         | 0         | 0         | 0         | 0         | 0         | 0         | 0         | 0         | 0         | 0          | 0          | 0          | PF16 protein, putative                                                           |
| PVX_092150 |         | 0         | 0         | 0         | 0         | 9.0047    | 0         | 0         | 0         | 10.7601   | 9.98109    | 22.6142    | 0          | hypothetical protein, conserved                                                  |
| PVX_092155 |         | 153.833   | 0         | 0         | 0         | 0         | 0         | 0         | 0         | 116.653   | 0          | 91.8728    | 0          | RNA-binding protein, putative                                                    |
| PVX_092160 |         | 0         | 0         | 0         | 0         | 0         | 0         | 0         | 0         | 0         | 0          | 13.3244    | 0          | hypothetical protein, conserved                                                  |
| PVX_092165 |         | 0         | 0         | 0         | 0         | 0         | 0         | 0         | 0         | 0         | 0          | 36.6267    | 149.134    | hypothetical protein, conserved                                                  |
| PVX_092170 |         | 0         | 0         | 0         | 0         | 42.1412   | 0         | 0         | 0         | 0         | 0          | 13.2174    | 0          | hypothetical protein, conserved                                                  |
| PVX_092175 |         | 20.6694   | 0         | 0         | 0         | 6.55147   | 0         | 0         | 0         | 39.1486   | 7.2635     | 16.4561    | 0          | hypothetical protein, conserved                                                  |
| PVX_092180 |         | 0         | 0         | 0         | 0         | 0         | 0         | 0         | 0         | 0         | 0          | 0          | 0          | hypothetical protein, conserved                                                  |
| PVX_092185 |         | 0         | 0         | 0         | 0         | 0         | 0         | 0         | 4.88687   | 0         | 0          | 15.4071    | 0          | hypothetical protein, conserved                                                  |
| PVX_092190 |         | 0         | 0         | 0         | 0         | 0         | 0         | 0         | 0         | 0         | 0          | 0          | 0          | hypothetical protein                                                             |
| PVX_092195 |         | 59.3506   | 0         | 0         | 0         | 0         | 0         | 45.3484   | 0         | 33.7258   | 31.2835    | 17.7199    | 0          | oxysterol-binding protein/PH domain containing protein                           |
| PVX_092200 |         | 0         | 0         | 0         | 0         | 0         | 0         | 72.1421   | 131.046   | 0         | 0          | 37.566     | 0          | hypothetical protein, conserved                                                  |
| PVX_092205 |         | 53.3214   | 37.2139   | 66.251    | 0         | 8.45173   | 0         | 0         | 0         | 30.2991   | 37.4746    | 37.1461    | 0          | ubiquitin domain containing protein                                              |
| PVX_092210 |         | 0         | 0         | 0         | 0         | 0         | 0         | 0         | 0         | 0         | 0          | 0          | 0          | hypothetical protein, conserved                                                  |
| PVX_092215 |         | 139.415   | 97.3252   | 115.545   | 445.548   | 73.6962   | 0         | 71.0541   | 193.607   | 193.677   | 228.602    | 138.751    | 75.2358    | T-complex protein 1, alpha subunit, putative                                     |
| PVX_092220 |         | 0         | 0         | 0         | 0         | 0         | 0         | 0         | 0         | 109.141   | 50.5498    | 143.269    | 0          | hypothetical protein, conserved                                                  |
| PVX_092225 |         | 25.0069   | 0         | 62.1384   | 0         | 15.8543   | 0         | 0         | 34.7199   | 37.8923   | 26.3627    | 44.7965    | 40.4606    | hypothetical protein, conserved                                                  |
| PVX_092230 |         | 0         | 0         | 0         | 0         | 0         | 0         | 0         | 31.2522   | 0         | 0          | 13.4411    | 0          | hypothetical protein, conserved                                                  |
| PVX_092235 |         | 0         | 61.7822   | 0         | 0         | 28.0832   | 0         | 0         | 0         | 33.5225   | 31.0732    | 52.822     | 0          | pre-mRNA splicing factor 38A, putative (PRP38A)                                  |



| Gene ID    | Patient 1 | Patient 2 | Patient 3 | Patient 4 | Patient 5 | Patient 6 | Patient 7 | Patient 8 | Patient 9 | Patient 10 | Patient 11 | Patient 12 | Gene Description                                                    |
|------------|-----------|-----------|-----------|-----------|-----------|-----------|-----------|-----------|-----------|------------|------------|------------|---------------------------------------------------------------------|
| Patient    |           |           |           |           |           |           |           |           |           |            |            |            |                                                                     |
| PVX_092240 | 121.14    | 0         | 301.832   | 0         | 0         | 0         | 0         | 0         | 0         | 85.0979    | 48.23      | 196.534    | 50S ribosomal protein L2, putative                                  |
| PVX_092245 | 0         | 0         | 0         | 0         | 99.2077   | 0         | 0         | 0         | 0         | 0          | 31.0514    | 0          | aquaglyceroporin, putative (AQP)                                    |
| PVX_092250 | 117.637   | 0         | 0         | 0         | 0         | 0         | 0         | 0         | 44.5916   | 41.3192    | 0          | 0          | glycine cleavage system H protein, putative                         |
| PVX_092260 | 24.1303   | 50.5212   | 0         | 0         | 7.6491    | 123.378   | 36.8683   | 67.0052   | 27.4229   | 8.47957    | 48.0292    | 0          | hypothetical protein, conserved                                     |
| PVX_092265 | 21.8343   | 30.4751   | 0         | 69.7304   | 6.92089   | 0         | 0         | 0         | 8.27106   | 7.67282    | 43.459     | 0          | hypothetical protein, conserved                                     |
| PVX_092270 | 0         | 0         | 0         | 0         | 0         | 0         | 0         | 0         | 0         | 0          | 14.2768    | 0          | LEM3/CDC50 family protein, putative                                 |
| PVX_092275 | 0         | 0         | 0         | 0         | 0         | 0         | 0         | 0         | 0         | 0          | 0          | 0          | apical membrane antigen 1 (AMA1)                                    |
| PVX_092280 | 0         | 0         | 0         | 0         | 15.3455   | 0         | 0         | 67.1886   | 109.984   | 84.9972    | 77.0411    | 78.3312    | hypothetical protein, conserved                                     |
| PVX_092285 | 56.4714   | 0         | 0         | 0         | 0         | 0         | 0         | 0         | 21.3971   | 0          | 33.7218    | 0          | hypothetical protein, conserved                                     |
| PVX_092290 | 0         | 24.939    | 0         | 0         | 11.3291   | 0         | 0         | 49.6124   | 13.536    | 37.6645    | 49.782     | 0          | hypothetical protein, conserved                                     |
| PVX_092300 | 32.3811   | 0         | 0         | 0         | 10.2666   | 0         | 0         | 0         | 49.0688   | 22.757     | 32.2262    | 52.4028    | hypothetical protein, conserved                                     |
| PVX_092305 | 0         | 28.5129   | 0         | 0         | 6.47516   | 0         | 0         | 28.3623   | 7.73856   | 7.17895    | 20.3307    | 0          | hypothetical protein, conserved                                     |
| PVX_092310 | 62.3049   | 173.945   | 77.4227   | 99.5151   | 49.3838   | 0         | 47.608    | 129.765   | 165.223   | 142.309    | 136.415    | 151.238    | heat shock protein 70, putative                                     |
| PVX_092315 | 83.5016   | 58.3198   | 207.831   | 0         | 26.5078   | 0         | 0         | 116.001   | 63.2894   | 176.006    | 166.215    | 0          | protein disulfide isomerase, putative                               |
| PVX_092320 | 14.5856   | 10.1779   | 36.2324   | 0         | 9.24483   | 74.5543   | 0         | 0         | 16.5747   | 20.5029    | 29.0309    | 0          | hypothetical protein, conserved                                     |
| PVX_092325 | 0         | 0         | 0         | 0         | 0         | 0         | 0         | 0         | 5.27224   | 4.89136    | 2.77034    | 0          | hypothetical protein, conserved                                     |
| PVX_092330 | 0         | 0         | 0         | 0         | 0         | 0         | 0         | 0         | 0         | 0          | 55.3796    | 0          | hypothetical protein, conserved                                     |
| PVX_092335 | 0         | 0         | 0         | 0         | 0         | 0         | 0         | 0         | 6.82679   | 6.3333     | 17.9355    | 29.1537    | hypothetical protein, conserved                                     |
| PVX_092340 | 0         | 0         | 0         | 0         | 0         | 0         | 0         | 0         | 0         | 0          | 0          | 0          | zinc finger protein, putative                                       |
| PVX_092345 | 0         | 69.6132   | 0         | 0         | 12.647    | 0         | 0         | 0         | 52.9018   | 21.0328    | 19.8548    | 0          | DNA-directed RNA polymerase I subunit RPA2, putative (RPA2)         |
| PVX_092350 | 132.215   | 230.805   | 0         | 211.385   | 20.9771   | 0         | 101.14    | 91.8216   | 25.0498   | 0          | 65.7941    | 0          | coatamer delta subunit, putative                                    |
| PVX_092355 | 0         | 0         | 0         | 0         | 0         | 0         | 0         | 0         | 0         | 0          | 0          | 0          | hypothetical protein, conserved                                     |
| PVX_092360 | 0         | 0         | 0         | 0         | 0         | 0         | 0         | 0         | 0         | 0          | 0          | 0          | PQ loop repeat family protein                                       |
| PVX_092365 | 0         | 185.62    | 0         | 0         | 36.1391   | 582.956   | 58.0688   | 105.503   | 100.746   | 186.883    | 105.862    | 0          | protein phosphatase 2C domain containing protein                    |
| PVX_092370 | 0         | 0         | 0         | 0         | 0         | 0         | 0         | 0         | 0         | 0          | 6.64727    | 0          | hypothetical protein, conserved                                     |
| PVX_092375 | 87.1612   | 60.8787   | 0         | 0         | 0         | 0         | 133.44    | 0         | 33.0324   | 61.2388    | 34.7002    | 0          | hypothetical protein, conserved                                     |
| PVX_092380 | 0         | 0         | 0         | 0         | 0         | 0         | 0         | 0         | 0         | 0          | 0          | 0          | hypothetical protein                                                |
| PVX_092385 | 171.648   | 0         | 427.25    | 0         | 81.7398   | 0         | 131.387   | 238.46    | 227.677   | 180.899    | 239.174    | 139.099    | hypothetical protein, conserved                                     |
| PVX_092390 | 64.721    | 0         | 0         | 206.943   | 0         | 0         | 0         | 179.789   | 73.5727   | 90.9552    | 38.6484    | 104.834    | hypothetical protein, conserved                                     |
| PVX_092395 | 0         | 0         | 44.2917   | 0         | 5.65053   | 0         | 0         | 49.5025   | 13.5067   | 18.7955    | 17.7426    | 28.8399    | hypothetical protein, conserved                                     |
| PVX_092400 | 0         | 0         | 0         | 0         | 0         | 0         | 3407.62   | 0         | 806.712   | 0          | 0          | 0          | hypothetical protein                                                |
| PVX_092405 | 0         | 0         | 0         | 0         | 0         | 0         | 0         | 0         | 128.324   | 0          | 0          | 0          | hypothetical protein, conserved                                     |
| PVX_092410 | 130.124   | 181.873   | 0         | 0         | 41.3554   | 0         | 199.487   | 180.852   | 98.6578   | 91.4041    | 77.7106    | 0          | 3-oxo-5-alpha-steroid 4-dehydrogenase, putative                     |
| PVX_092415 | 0         | 0         | 0         | 0         | 0         | 0         | 0         | 0         | 3.62015   | 0          | 1.90228    | 0          | hypothetical protein, conserved                                     |
| PVX_092420 | 0         | 34.4653   | 0         | 0         | 0         | 0         | 0         | 0         | 0         | 17.3463    | 0          | 0          | hypothetical protein, conserved                                     |
| PVX_092425 | 0         | 0         | 0         | 0         | 0         | 0         | 0         | 0         | 0         | 0          | 0          | 0          | hypothetical protein, conserved                                     |
| PVX_092430 | 74.1708   | 17.2546   | 0         | 0         | 23.5119   | 0         | 75.551    | 0         | 84.2918   | 69.5043    | 34.4471    | 0          | tudor staphylococcal nuclease, putative (TSN)                       |
| PVX_092435 | 75.5934   | 26.3827   | 93.9532   | 0         | 11.9852   | 193.333   | 57.7741   | 52.4841   | 157.513   | 79.6868    | 120.372    | 61.1763    | signal recognition particle subunit SRP72, putative (SRP72)         |
| PVX_092440 | 133.855   | 31.147    | 0         | 0         | 28.3014   | 0         | 68.216    | 123.921   | 50.7136   | 62.7103    | 8.8811     | 0          | casein kinase 1, putative (CK1)                                     |
| PVX_092445 | 0         | 34.8268   | 0         | 0         | 0         | 0         | 0         | 0         | 9.45194   | 17.5359    | 4.96629    | 0          | hypothetical protein, conserved                                     |
| PVX_092450 | 0         | 0         | 0         | 0         | 0         | 0         | 0         | 0         | 0         | 0          | 17.2493    | 0          | hypothetical protein, conserved                                     |
| PVX_092455 | 0         | 0         | 0         | 0         | 0         | 0         | 0         | 0         | 71.9551   | 0          | 0          | 0          | DnaJ domain containing protein                                      |
| PVX_092460 | 0         | 0         | 0         | 0         | 5.84989   | 0         | 28.195    | 0         | 0         | 0          | 3.67367    | 0          | subtilisin-like protease 2, putative                                |
| PVX_092465 | 146.74    | 0         | 0         | 0         | 23.2857   | 0         | 0         | 0         | 55.6063   | 77.329     | 87.6273    | 0          | 30S ribosomal protein S9, putative                                  |
| PVX_092470 | 0         | 0         | 0         | 0         | 0         | 0         | 123.658   | 0         | 0         | 28.3814    | 0          | 0          | hypothetical protein, conserved                                     |
| PVX_092475 | 0         | 0         | 0         | 0         | 0         | 0         | 0         | 0         | 0         | 0          | 0          | 0          | hypothetical protein                                                |
| PVX_092480 | 102.292   | 107.121   | 127.184   | 326.952   | 0         | 0         | 78.2127   | 71.0304   | 38.7573   | 35.9414    | 91.6249    | 82.8143    | hypothetical protein, conserved                                     |
| PVX_092485 | 0         | 160.562   | 0         | 0         | 0         | 0         | 117.288   | 106.458   | 29.0419   | 53.8474    | 45.7649    | 0          | hypothetical protein, conserved                                     |
| PVX_092490 | 0         | 0         | 0         | 0         | 92.1813   | 0         | 0         | 402.174   | 0         | 0          | 0          | 0          | 30S ribosomal protein S14, putative                                 |
| PVX_092495 | 0         | 0         | 0         | 0         | 0         | 0         | 0         | 0         | 0         | 0          | 0          | 0          | hypothetical protein, conserved                                     |
| PVX_092500 | 0         | 0         | 0         | 0         | 0         | 0         | 0         | 0         | 0         | 0          | 0          | 0          | hypothetical protein, conserved                                     |
| PVX_092505 | 0         | 0         | 0         | 0         | 0         | 0         | 0         | 0         | 0         | 0          | 0          | 0          | hypothetical protein, conserved                                     |
| PVX_092510 | 0         | 0         | 0         | 0         | 0         | 0         | 0         | 0         | 0         | 0          | 8.08679    | 0          | hypothetical protein, conserved                                     |
| PVX_092515 | 0         | 0         | 0         | 0         | 0         | 0         | 0         | 0         | 0         | 0          | 2.05717    | 0          | hypothetical protein, conserved                                     |
| PVX_092520 | 0         | 0         | 0         | 0         | 0         | 901.727   | 0         | 244.112   | 199.724   | 61.6465    | 139.803    | 0          | ubiquitin-related modifier 1, putative (URM1)                       |
| PVX_092525 | 0         | 0         | 0         | 0         | 0         | 0         | 0         | 0         | 0         | 0          | 0          | 0          | hypothetical protein, conserved                                     |
| PVX_092530 | 76.3103   | 0         | 0         | 0         | 0         | 0         | 0         | 0         | 0         | 26.809     | 30.3798    | 0          | hypothetical protein, conserved                                     |
| PVX_092535 | 0         | 0         | 0         | 0         | 0         | 0         | 0         | 0         | 0         | 0          | 3.03533    | 0          | Adenylate and Guanylate cyclase catalytic domain containing protein |
| PVX_092540 | 76.4736   | 124.533   | 63.3428   | 244.253   | 40.4038   | 0         | 77.8986   | 106.178   | 106.222   | 89.5774    | 208.026    | 0          | protein phosphatase 2C, putative                                    |
| PVX_092545 | 57.2664   | 39.9829   | 0         | 0         | 0         | 0         | 0         | 0         | 0         | 0          | 68.3931    | 0          | beta-catenin-like protein 1, putative                               |
| PVX_092550 | 0         | 10.8237   | 38.5318   | 0         | 0         | 0         | 0         | 21.5334   | 0         | 10.9017    | 12.349     | 0          | hypothetical protein, conserved                                     |
| PVX_092555 | 0         | 46.0487   | 0         | 0         | 5.2285    | 0         | 0         | 45.8062   | 15.6227   | 13.5274    | 17.5125    | 0          | WD domain, G-beta repeat domain containing protein                  |

| Gene ID    | Patient 1 | Patient 2 | Patient 3 | Patient 4 | Patient 5 | Patient 6 | Patient 7 | Patient 8 | Patient 9 | Patient 10 | Patient 11 | Patient 12 | Gene Description                                                                |
|------------|-----------|-----------|-----------|-----------|-----------|-----------|-----------|-----------|-----------|------------|------------|------------|---------------------------------------------------------------------------------|
| Patient    |           |           |           |           |           |           |           |           |           |            |            |            |                                                                                 |
| PVX_092560 | 0         | 0         | 0         | 0         | 0         | 0         | 0         | 0         | 0         | 0          | 0          | 0          | hypothetical protein, conserved                                                 |
| PVX_092565 | 0         | 0         | 0         | 0         | 0         | 0         | 134.226   | 0         | 0         | 92.3979    | 52.3563    | 0          | hypothetical protein, conserved                                                 |
| PVX_092570 | 10.8035   | 15.0768   | 0         | 34.4915   | 13.694    | 0         | 0         | 0         | 0         | 11.39      | 17.2024    | 34.9457    | transcription factor with AP2 domain(s), putative (ApiAP2)                      |
| PVX_092575 | 0         | 0         | 0         | 0         | 0         | 0         | 0         | 0         | 0         | 0          | 21.197     | 0          | AAA family ATPase, putative                                                     |
| PVX_092580 | 0         | 0         | 0         | 0         | 0         | 0         | 0         | 0         | 0         | 0          | 9.90871    | 0          | hypothetical protein                                                            |
| PVX_092585 | 16.9784   | 0         | 0         | 54.2927   | 10.7755   | 0         | 0         | 0         | 15.0118   | 0          | 16.8979    | 0          | adrenodoxin reductase, putative                                                 |
| PVX_092590 | 29.3145   | 0         | 0         | 0         | 4.64514   | 0         | 0         | 20.3482   | 5.55204   | 0          | 17.5041    | 0          | hypothetical protein, conserved                                                 |
| PVX_092595 | 0         | 0         | 0         | 0         | 144.813   | 0         | 0         | 0         | 172.436   | 79.7867    | 45.2502    | 0          | conserved protein, unknown function                                             |
| PVX_092600 | 0         | 357.053   | 0         | 0         | 54.1514   | 0         | 0         | 0         | 0         | 119.544    | 135.548    | 276.537    | vacuolar ATP synthase subunit f, putative                                       |
| PVX_092605 | 115.419   | 40.2925   | 0         | 0         | 36.617    | 0         | 353.071   | 80.1505   | 196.797   | 81.1045    | 114.871    | 93.4586    | hypothetical protein, conserved                                                 |
| PVX_092610 | 0         | 0         | 0         | 264.66    | 0         | 0         | 0         | 0         | 94.056    | 58.1265    | 98.8072    | 0          | hypothetical protein, conserved                                                 |
| PVX_092615 | 0         | 0         | 0         | 0         | 0         | 0         | 0         | 0         | 0         | 0          | 0          | 0          | hypothetical protein, conserved                                                 |
| PVX_092620 | 0         | 0         | 0         | 0         | 0         | 0         | 0         | 0         | 0         | 0          | 0          | 0          | myosin heavy chain subunit, putative                                            |
| PVX_092625 | 0         | 0         | 0         | 0         | 0         | 0         | 0         | 0         | 0         | 0          | 0          | 0          | hypothetical protein                                                            |
| PVX_092630 | 22.5545   | 39.3451   | 28.0115   | 36.0045   | 10.721    | 0         | 0         | 46.9662   | 17.0865   | 27.7421    | 65.0932    | 18.2393    | hypothetical protein, conserved                                                 |
| PVX_092635 | 136.801   | 23.8712   | 85.0044   | 0         | 0         | 0         | 0         | 47.4883   | 38.8694   | 72.1054    | 34.0366    | 0          | hypothetical protein, conserved                                                 |
| PVX_092640 | 17.7329   | 0         | 0         | 0         | 5.62029   | 0         | 0         | 0         | 0         | 0          | 0          | 0          | hypothetical protein, conserved                                                 |
| PVX_092650 | 0         | 0         | 0         | 0         | 0         | 0         | 0         | 0         | 0         | 0          | 0          | 0          | hypothetical protein, conserved                                                 |
| PVX_092655 | 0         | 0         | 0         | 0         | 0         | 0         | 0         | 0         | 0         | 0          | 2.2574     | 0          | hypothetical protein                                                            |
| PVX_092660 | 0         | 0         | 389.014   | 0         | 0         | 0         | 0         | 0         | 0         | 0          | 155.257    | 0          | hypothetical protein, conserved                                                 |
| PVX_092665 | 0         | 0         | 0         | 0         | 0         | 0         | 0         | 0         | 0         | 0          | 0          | 0          | hypothetical protein                                                            |
| PVX_092670 | 0         | 0         | 0         | 0         | 0         | 0         | 49.3267   | 0         | 0         | 0          | 0          | 0          | hypothetical protein, conserved                                                 |
| PVX_092675 | 0         | 0         | 0         | 1032.57   | 0         | 0         | 247.111   | 0         | 61.0581   | 56.5481    | 64.1145    | 261.542    | phosphatidylinositol N-acetylglucosaminyltransferase subunit H, putative (PIGH) |
| PVX_092680 | 0         | 0         | 0         | 0         | 0         | 0         | 0         | 0         | 0         | 0          | 25.791     | 0          | hypothetical protein, conserved                                                 |
| PVX_092685 | 152.782   | 0         | 0         | 0         | 0         | 0         | 0         | 0         | 0         | 53.6542    | 60.8302    | 0          | dolichol-phosphate mannosyltransferase, putative (DPM1)                         |
| PVX_092690 | 78.3136   | 109.385   | 0         | 0         | 0         | 0         | 0         | 108.789   | 29.6775   | 82.5375    | 77.9436    | 253.8      | hypothetical protein, conserved                                                 |
| PVX_092695 | 0         | 0         | 0         | 0         | 0         | 0         | 0         | 0         | 0         | 0          | 0          | 0          | hypothetical protein, conserved                                                 |
| PVX_092700 | 0         | 39.1309   | 0         | 0         | 0         | 0         | 0         | 0         | 0         | 0          | 0          | 0          | inner membrane complex protein 1b, putative (IMC1b)                             |
| PVX_092705 | 0         | 0         | 0         | 0         | 0         | 0         | 0         | 0         | 0         | 0          | 0          | 0          | hypothetical protein, conserved                                                 |
| PVX_092710 | 30.7793   | 28.6358   | 50.967    | 32.7551   | 9.75346   | 0         | 15.6688   | 28.4855   | 11.6586   | 14.4224    | 34.7153    | 0          | hypothetical protein, conserved                                                 |
| PVX_092715 | 0         | 113.192   | 0         | 0         | 0         | 0         | 0         | 0         | 0         | 0          | 0          | 0          | hypothetical protein, conserved                                                 |
| PVX_092720 | 0         | 0         | 0         | 0         | 0         | 0         | 0         | 0         | 6.69334   | 0          | 3.51699    | 0          | hypothetical protein, conserved                                                 |
| PVX_092725 | 66.9983   | 93.567    | 0         | 0         | 0         | 0         | 102.505   | 0         | 76.1626   | 70.6159    | 53.3446    | 0          | coproporphyrinogen-III oxidase, putative                                        |
| PVX_092730 | 808.056   | 225.975   | 806.256   | 0         | 154.207   | 829.73    | 248.008   | 449.369   | 612.789   | 567.522    | 579.115    | 0          | 60S ribosomal protein L28, putative                                             |
| PVX_092735 | 560.785   | 915.11    | 466.613   | 0         | 118.984   | 960.443   | 0         | 519.894   | 1134.25   | 1115.78    | 483.787    | 303.829    | 60S ribosomal protein L35ae, putative                                           |
| PVX_092740 | 0         | 40.2665   | 0         | 0         | 0         | 0         | 0         | 0         | 21.8523   | 20.2631    | 22.9593    | 0          | methyltransferase, putative                                                     |
| PVX_092745 | 0         | 48.7562   | 0         | 223.282   | 44.3148   | 0         | 0         | 96.983    | 79.3729   | 98.1198    | 97.2864    | 113.111    | hypothetical protein, conserved                                                 |
| PVX_092750 | 0         | 0         | 0         | 0         | 0         | 0         | 0         | 65.0086   | 0         | 0          | 0          | 0          | hypothetical protein                                                            |
| PVX_092755 | 83.5016   | 58.3198   | 0         | 0         | 26.5078   | 0         | 0         | 0         | 0         | 29.3343    | 116.351    | 135.326    | alpha/beta hydrolase, putative, alpha/beta hydrolase, putative                  |
| PVX_092760 | 0         | 0         | 0         | 0         | 0         | 0         | 0         | 0         | 0         | 0          | 3.21079    | 0          | transcription factor with AP2 domain(s), putative (AP2-O)                       |
| PVX_092765 | 84.0505   | 58.7036   | 0         | 0         | 0         | 0         | 128.665   | 0         | 63.7057   | 147.635    | 66.9233    | 0          | DnaJ protein, putative                                                          |
| PVX_092770 | 0         | 0         | 0         | 0         | 0         | 0         | 0         | 155.692   | 42.4686   | 78.7092    | 44.6066    | 181.724    | DNA-directed RNA polymerase I, putative                                         |
| PVX_092775 | 73.2498   | 306.917   | 0         | 702.81    | 46.495    | 0         | 112.092   | 0         | 305.334   | 231.607    | 174.968    | 0          | translation initiation factor eIF-1A, putative                                  |
| PVX_092780 | 0         | 0         | 0         | 0         | 0         | 0         | 0         | 0         | 0         | 0          | 25.8652    | 0          | hypothetical protein, conserved                                                 |
| PVX_092785 | 0         | 0         | 0         | 0         | 0         | 0         | 0         | 0         | 0         | 0          | 18.0718    | 0          | hypothetical protein, conserved                                                 |
| PVX_092790 | 0         | 0         | 0         | 0         | 0         | 0         | 0         | 0         | 0         | 0          | 8.07579    | 0          | hypothetical protein, conserved                                                 |
| PVX_092795 | 0         | 189.294   | 0         | 0         | 0         | 154.107   | 0         | 0         | 34.2483   | 52.9466    | 35.9888    | 0          | hypothetical protein, conserved                                                 |
| PVX_092800 | 0         | 50.4502   | 0         | 0         | 22.9279   | 0         | 0         | 0         | 0         | 50.7623    | 50.3318    | 0          | carbohydrate kinase, putative                                                   |
| PVX_092805 | 664.954   | 465.25    | 553.832   | 711.866   | 353.016   | 0         | 681.6     | 616.678   | 1261.19   | 855.94     | 750.196    | 721.239    | 40S ribosomal protein S21, putative                                             |
| PVX_092810 | 0         | 0         | 0         | 0         | 178.557   | 0         | 0         | 0         | 0         | 98.2254    | 167.178    | 0          | mitochondrial large subunit ribosomal protein, putative                         |
| PVX_092815 | 0         | 0         | 0         | 0         | 0         | 0         | 0         | 0         | 0         | 0          | 0          | 0          | hypothetical protein, conserved                                                 |
| PVX_092820 | 5705.59   | 1506.42   | 1806.73   | 4644.54   | 919.656   | 7444.97   | 2227.65   | 996.871   | 2985.87   | 4246.07    | 1420.84    | 1176.42    | 60S ribosomal protein L41, putative                                             |
| PVX_092825 | 0         | 0         | 0         | 0         | 0         | 0         | 0         | 30.3586   | 8.28319   | 7.68407    | 13.0568    | 0          | hypothetical protein, conserved                                                 |
| PVX_092830 | 59.0031   | 0         | 0         | 188.63    | 18.7195   | 0         | 0         | 163.896   | 22.3567   | 62.1915    | 0          | 0          | ubiquitin activating enzyme, putative                                           |
| PVX_092835 | 0         | 134.331   | 0         | 0         | 0         | 0         | 0         | 0         | 109.325   | 101.328    | 19.1398    | 0          | hypothetical protein, conserved                                                 |
| PVX_092840 | 0         | 0         | 0         | 0         | 0         | 0         | 0         | 0         | 65.2384   | 30.2367    | 119.932    | 0          | apicoplast import protein Tic20, putative (TIC20)                               |
| PVX_092845 | 0         | 0         | 0         | 0         | 0         | 0         | 0         | 0         | 0         | 17.0918    | 0          | 0          | hypothetical protein, conserved                                                 |
| PVX_092850 | 212.696   | 0         | 0         | 0         | 0         | 0         | 0         | 0         | 80.6773   | 74.6722    | 296.42     | 0          | ras-related protein Rab-6, putative (RAB6)                                      |
| PVX_092855 | 0         | 0         | 0         | 0         | 0         | 0         | 0         | 0         | 0         | 0          | 0          | 0          | hypothetical protein, conserved                                                 |
| PVX_092860 | 94.8775   | 110.368   | 0         | 101.029   | 50.1348   | 0         | 0         | 43.9126   | 71.8861   | 111.131    | 75.5388    | 51.1795    | coatamer subunit gamma, putative                                                |
| PVX_092865 | 0         | 0         | 0         | 0         | 0         | 0         | 0         | 0         | 0         | 0          | 0          | 0          | protein kinase domain containing protein                                        |
| PVX_092870 | 0         | 216.341   | 0         | 0         | 0         | 0         | 0         | 430.018   | 0         | 0          | 61.4981    | 0          | cysteine-rich PDZ-binding protein, putative (CRIPT)                             |

| Gene ID    | Patient 1 | Patient 2 | Patient 3 | Patient 4 | Patient 5 | Patient 6 | Patient 7 | Patient 8 | Patient 9 | Patient 10 | Patient 11 | Patient 12 | Gene Description                                                                              |                                 |
|------------|-----------|-----------|-----------|-----------|-----------|-----------|-----------|-----------|-----------|------------|------------|------------|-----------------------------------------------------------------------------------------------|---------------------------------|
| Patient    |           |           |           |           |           |           |           |           |           |            |            |            |                                                                                               |                                 |
| PVX_092875 | 119.763   | 27.8664   | 99.2398   | 0         | 0         | 0         | 0         | 110.87    | 45.3733   | 42.0824    | 87.4071    | 0          | dynamine-like protein, putative                                                               |                                 |
| PVX_092880 | 83.2979   | 0         | 0         | 0         | 13.208    | 0         | 0         | 115.671   | 15.7792   | 73.1723    | 49.7402    | 0          | ABC transporter, putative                                                                     |                                 |
| PVX_092885 | 0         | 0         | 0         | 0         | 14.9886   | 0         | 0         | 65.6268   | 0         | 0          | 9.40638    | 0          | conserved protein, unknown function                                                           |                                 |
| PVX_092890 | 0         | 0         | 0         | 0         | 0         | 0         | 0         | 0         | 0         | 0          | 31.9893    | 130.211    | bicoid-interacting protein BIN3, putative                                                     |                                 |
| PVX_092895 | 0         | 21.7734   | 0         | 0         | 0         | 159.538   | 0         | 0         | 0         | 21.9242    | 18.628     | 50.4831    | hypothetical protein, conserved                                                               |                                 |
| PVX_092897 | 0         | 0         | 0         | 0         | 0         | 0         | 0         | 0         | 0         | 0          | 0          | 0          | conserved Plasmodium protein, unknown function                                                |                                 |
| PVX_092900 | 0         | 0         | 125.037   | 0         | 15.9498   | 0         | 0         | 0         | 76.2075   | 0          | 40.0357    | 162.833    | WD domain, G-beta repeat domain containing protein                                            |                                 |
| PVX_092905 | 0         | 0         | 0         | 0         | 0         | 0         | 0         | 0         | 0         | 0          | 0          | 0          | hypothetical protein                                                                          |                                 |
| PVX_092910 | 0         | 210.506   | 0         | 0         | 0         | 0         | 0         | 418.43    | 0         | 105.472    | 119.69     | 0          | hypothetical protein, conserved                                                               |                                 |
| PVX_092915 | 0         | 0         | 0         | 0         | 0         | 0         | 0         | 0         | 0         | 0          | 0          | 0          | hypothetical protein                                                                          |                                 |
| PVX_092920 | 0         | 0         | 0         | 0         | 0         | 0         | 0         | 0         | 0         | 0          | 0          | 0          | leucine-rich repeat protein (LRR10)                                                           |                                 |
| PVX_092925 | 0         | 0         | 0         | 0         | 0         | 0         | 0         | 41.9125   | 0         | 21.2144    | 12.0165    | 0          | CCAAT-box DNA binding protein subunit B, putative                                             |                                 |
| PVX_092930 | 0         | 0         | 0         | 0         | 0         | 0         | 0         | 0         | 0         | 0          | 0          | 0          | kinesin-like protein, putative                                                                |                                 |
| PVX_092935 | 0         | 0         | 0         | 0         | 0         | 0         | 0         | 0         | 0         | 0          | 0          | 2.1128     | hypothetical protein, conserved                                                               |                                 |
| PVX_092940 | 149.062   | 0         | 0         | 0         | 23.6548   | 0         | 114.057   | 0         | 0         | 0          | 29.6713    | 120.757    | hypothetical protein                                                                          |                                 |
| PVX_092945 | 0         | 0         | 0         | 0         | 0         | 0         | 0         | 0         | 0         | 0          | 1.83355    | 0          | sporozoite asparagine-rich protein,sporozoite and liver stage asparagine-rich protein (SLARP) |                                 |
| PVX_092947 | 0         | 0         | 0         | 0         | 0         | 0         | 0         | 0         | 0         | 0          | 0          | 0          | conserved Plasmodium protein, unknown function                                                |                                 |
| PVX_092950 | 0         | 0         | 0         | 0         | 0         | 0         | 0         | 0         | 0         | 0          | 0          | 16.8561    | tubulin-tyrosine ligase, putative                                                             |                                 |
| PVX_092955 | 0         | 0         | 0         | 0         | 0         | 0         | 0         | 0         | 0         | 0          | 4.20434    | 0          | hypothetical protein, conserved                                                               |                                 |
| PVX_092958 | 0         | 1320.15   | 4821.05   | 0         | 0         | 0         | 0         | 2613.15   | 0         | 0          | 0          | 0          | conserved Plasmodium protein, unknown function                                                |                                 |
| PVX_092962 | 0         | 0         | 0         | 96.3268   | 19.1207   | 0         | 0         | 0         | 0         | 10.5965    | 12.0044    | 48.7976    | farnesyltransferase beta subunit, putative                                                    |                                 |
| PVX_092965 | 0         | 0         | 0         | 0         | 19.6266   | 0         | 94.6254   | 0         | 23.4389   | 43.4664    | 110.816    | 0          | hypothetical protein, conserved                                                               |                                 |
| PVX_092970 | 0         | 0         | 0         | 0         | 34.0447   | 0         | 0         | 0         | 81.3272   | 56.5622    | 74.768     | 0          | hypothetical protein, conserved                                                               |                                 |
| PVX_092975 | 0         | 0         | 0         | 0         | 0         | 0         | 0         | 0         | 0         | 0          | 3.2079     | 0          | merozoite adhesive erythrocytic binding protein (MAEBL)                                       |                                 |
| PVX_092980 | 0         | 137.951   | 0         | 0         | 0         | 0         | 0         | 0         | 0         | 0          | 39.2653    | 0          | hypothetical protein, conserved                                                               |                                 |
| PVX_092985 | 0         | 0         | 0         | 64.1692   | 0         | 0         | 0         | 27.8974   | 22.8351   | 7.0613     | 19.9975    | 0          | serine/threonine protein kinase, putative                                                     |                                 |
| PVX_092990 | 20.3221   | 340.367   | 100.982   | 0         | 12.8826   | 207.789   | 62.092    | 56.4283   | 123.17    | 92.839     | 32.3592    | 0          | tryptophan-rich antigen (Pv-fam-a)                                                            |                                 |
| PVX_092995 | 0         | 885.948   | 0         | 0         | 50.3333   | 1218.16   | 0         | 110.139   | 120.183   | 55.7072    | 142.039    | 0          | tryptophan-rich antigen (Pv-fam-a)                                                            |                                 |
| PVX_093495 | 0         | 0         | 0         | 0         | 0         | 0         | 0         | 0         | 0         | 0          | 0          | 0          | hypothetical protein, conserved                                                               |                                 |
| PVX_093500 | 0         | 0         | 0         | 0         | 0         | 0         | 0         | 0         | 0         | 0          | 0          | 0          | gamete release protein, putative (GAMER)                                                      |                                 |
| PVX_093505 | 0         | 0         | 0         | 0         | 0         | 0         | 0         | 0         | 0         | 0          | 0          | 0          | hypothetical protein, conserved                                                               |                                 |
| PVX_093510 | 45.0904   | 31.4768   | 0         | 288.191   | 42.9018   | 0         | 137.878   | 62.6165   | 68.3338   | 126.747    | 80.7757    | 72.9965    | hypothetical protein, conserved                                                               |                                 |
| PVX_093515 | 74.9051   | 0         | 0         | 0         | 47.5477   | 0         | 0         | 208.101   | 56.7704   | 78.9465    | 89.4611    | 0          | GTPase-activating protein, putative                                                           |                                 |
| PVX_093520 | 0         | 0         | 381.01    | 0         | 0         | 784.193   | 0         | 0         | 173.783   | 107.308    | 60.8302    | 248.089    | cyclophilin, putative,peptidyl-prolyl cis-trans isomerase precursor, putative                 |                                 |
| PVX_093525 | 0         | 0         | 0         | 0         | 0         | 0         | 0         | 0         | 5.44852   | 0          | 2.86296    | 0          | hypothetical protein                                                                          |                                 |
| PVX_093530 | 53.2459   | 37.1739   | 0         | 0         | 16.8905   | 0         | 0         | 0         | 100.872   | 56.1248    | 42.3941    | 0          | pseudouridylate synthase 1, putative                                                          |                                 |
| PVX_093535 | 0         | 8.25097   | 0         | 0         | 7.49378   | 0         | 0         | 0         | 8.95823   | 8.31185    | 24.7137    | 0          | hypothetical protein, conserved                                                               |                                 |
| PVX_093540 | 47.787    | 0         | 0         | 0         | 15.1569   | 0         | 219.204   | 0         | 18.1055   | 16.7907    | 76.0949    | 0          | methionine aminopeptidase 1c, putative (METAP1c)                                              |                                 |
| PVX_093545 | 0         | 0         | 0         | 155.468   | 0         | 0         | 74.3806   | 0         | 36.8606   | 17.0918    | 58.0949    | 78.7575    | hypothetical protein, conserved                                                               |                                 |
| PVX_093550 | 0         | 138.038   | 0         | 0         | 12.5419   | 0         | 0         | 44.9521   | 55.5892   | 55.1065    | 0          | 0          | cactin homolog, putative                                                                      |                                 |
| PVX_093555 | 630.504   | 110.196   | 393.143   | 505.325   | 100.26    | 0         | 241.862   | 219.136   | 179.299   | 332.123    | 313.796    | 767.969    | proteasome subunit beta type-4, putative                                                      |                                 |
| PVX_093560 | 77.4327   | 0         | 192.693   | 0         | 24.5776   | 0         | 0         | 0         | 58.6871   | 0          | 107.894    | 125.469    | tubulin gamma chain, putative                                                                 |                                 |
| PVX_093565 | 17.6281   | 0         | 0         | 0         | 0         | 0         | 0         | 24.4733   | 6.67751   | 18.5845    | 28.0694    | 0          | hypothetical protein, conserved                                                               |                                 |
| PVX_093570 | 0         | 0         | 0         | 0         | 0         | 0         | 0         | 0         | 0         | 0          | 0          | 0          | AAA family ATPase, putative                                                                   |                                 |
| PVX_093575 | 0         | 0         | 74.3406   | 0         | 9.48362   | 0         | 0         | 0         | 11.3321   | 0          | 17.8621    | 0          | DNA repair protein RAD54, putative (RAD54)                                                    |                                 |
| PVX_093580 | 0         | 69.8714   | 0         | 0         | 31.7645   | 0         | 153.189   | 0         | 37.9089   | 70.2686    | 59.7301    | 0          | mitogen-activated protein kinase organizer 1, putative                                        |                                 |
| PVX_093585 | 0         | 0         | 0         | 0         | 0         | 0         | 79.7186   | 0         | 0         | 0          | 10.3763    | 0          | SF-assembly, putative                                                                         |                                 |
| PVX_093590 | 0         | 24.4891   | 87.206    | 112.09    | 33.3739   | 0         | 0         | 48.7174   | 79.7508   | 36.9854    | 69.8346    | 113.566    | hypothetical protein, conserved                                                               |                                 |
| PVX_093595 | 0         | 122.218   | 145.125   | 0         | 37.0234   | 0         | 0         | 0         | 44.2177   | 82.0032    | 116.144    | 0          | peptidyl-prolyl cis-trans isomerase, putative                                                 |                                 |
| PVX_093600 | 0         | 0         | 0         | 0         | 0         | 0         | 0         | 0         | 0         | 0          | 0          | 0          | hypothetical protein, conserved                                                               |                                 |
| PVX_093605 | 0         | 0         | 0         | 0         | 38.0673   | 0         | 91.7655   | 0         | 90.9262   | 42.1556    | 47.7657    | 0          | serine/threonine protein phosphatase 2B catalytic subunit A, putative (CNA)                   |                                 |
| PVX_093607 | 0         | 0         | 0         | 0         | 0         | 0         | 0         | 166.323   | 0         | 0          | 23.8247    | 0          | conserved Plasmodium protein, unknown function                                                |                                 |
| PVX_093610 | 16.3078   | 0         | 0         | 0         | 0         | 0         | 0         | 0         | 0         | 0          | 0          | 0          | adenylyl cyclase beta, putative                                                               |                                 |
| PVX_093615 | 24.2677   | 0         | 0         | 0         | 0         | 0         | 0         | 0         | 27.5791   | 17.0557    | 24.1513    | 0          | inositol 5-phosphatase, putative                                                              |                                 |
| PVX_093620 | 0         | 98.4196   | 0         | 0         | 0         | 0         | 161.635   | 0         | 26.7093   | 49.5469    | 0          | 0          | hypothetical protein, conserved                                                               |                                 |
| PVX_093625 | 29.7938   | 41.5889   | 0         | 190.343   | 0         | 0         | 45.5297   | 82.7363   | 33.8605   | 31.4084    | 11.8605    | 0          | hypothetical protein, conserved                                                               |                                 |
| PVX_093630 | 480.658   | 0         | 299.392   | 384.823   | 114.543   | 0         | 0         | 333.988   | 409.953   | 295.444    | 310.969    | 0          | 1-cys peroxiredoxin (1-CysPrx)                                                                |                                 |
| PVX_093635 | 11.8507   | 0         | 0         | 0         | 3.75543   | 0         | 18.0994   | 32.9031   | 4.48886   | 0          | 7.0762     | 0          | transcription factor with AP2 domain(s), putative (ApiAP2)                                    |                                 |
| PVX_093640 | 0         | 53.054    | 62.9659   | 0         | 8.03269   | 0         | 0         | 0         | 57.595    | 17.809     | 35.3054    | 0          | NAD-specific glutamate dehydrogenase, putative                                                |                                 |
| PVX_093645 | 0         | 0         | 0         | 27.1379   | 5.38725   | 0         | 12.9816   | 11.8006   | 0         | 8.96235    | 10.1517    | 13.7476    | 0                                                                                             | hypothetical protein, conserved |
| PVX_093650 | 0         | 52.1703   | 0         | 0         | 0         | 0         | 0         | 0         | 42.4737   | 26.2628    | 14.8768    | 0          | mannose-6-phosphate isomerase, putative                                                       |                                 |
| PVX_093655 | 19.095    | 0         | 0         | 0         | 0         | 0         | 0         | 0         | 7.23324   | 0          | 7.60131    | 0          | sentrin-specific protease 2, putative (SEN2)                                                  |                                 |

| Gene ID    | Patient 1 | Patient 2 | Patient 3 | Patient 4 | Patient 5 | Patient 6 | Patient 7 | Patient 8 | Patient 9 | Patient 10 | Patient 11 | Patient 12 | Gene Description                                                              |
|------------|-----------|-----------|-----------|-----------|-----------|-----------|-----------|-----------|-----------|------------|------------|------------|-------------------------------------------------------------------------------|
| Patient    |           |           |           |           |           |           |           |           |           |            |            |            |                                                                               |
| PVX_093660 | 0         | 100.284   | 0         | 0         | 45.6136   | 0         | 0         | 398.868   | 108.79    | 50.3879    | 57.1237    | 0          | hypothetical protein, conserved                                               |
| PVX_093665 | 0         | 41.061    | 0         | 376.019   | 18.6579   | 0         | 89.953    | 0         | 133.699   | 41.3248    | 35.118     | 0          | hypothetical protein, conserved                                               |
| PVX_093670 | 0         | 0         | 0         | 0         | 0         | 0         | 0         | 0         | 0         | 0          | 0          | 0          | protein kinase, putative                                                      |
| PVX_093675 | 0         | 0         | 0         | 0         | 0         | 0         | 0         | 0         | 0         | 0          | 0          | 0          | von Willebrand factor A domain-related protein, putative (WARP)               |
| PVX_093680 | 1256.74   | 2424.86   | 367.386   | 629.624   | 359.323   | 2393.91   | 376.506   | 1129.03   | 1568.25   | 1844.44    | 774.951    | 438.567    | Phist protein (Pf-fam-b)                                                      |
| PVX_093682 | 0         | 0         | 0         | 0         | 0         | 0         | 0         | 0         | 0         | 0          | 0          | 0          | Plasmodium exported protein, unknown function                                 |
| PVX_093685 | 339.512   | 681.372   | 105.506   | 135.612   | 94.2117   | 434.217   | 194.639   | 648.262   | 418.044   | 402.624    | 464.601    | 412.194    | Plasmodium exported protein, unknown function                                 |
| PVX_093695 | 0         | 401.697   | 0         | 0         | 0         | 0         | 0         | 0         | 0         | 67.3351    | 76.3133    | 0          | ring-exported protein 3, putative                                             |
| PVX_093700 | 0         | 131.004   | 0         | 0         | 59.6171   | 0         | 0         | 0         | 0         | 65.7716    | 0          | 0          | Plasmodium exported protein, unknown function                                 |
| PVX_093705 | 0         | 55.7674   | 0         | 0         | 0         | 0         | 122.22    | 0         | 0         | 28.0523    | 63.579     | 0          | variable surface protein Vir18, putative, pseudogene, PIR protein, pseudogene |
| PVX_093710 | 0         | 0         | 0         | 0         | 0         | 0         | 0         | 99.7876   | 0         | 0          | 0          | 0          | variable surface protein Vir24-related, PIR protein                           |
| PVX_093715 | 0         | 0         | 0         | 0         | 0         | 0         | 0         | 0         | 0         | 0          | 42.0882    | 0          | variable surface protein Vir5-like, PIR protein                               |
| PVX_093720 | 0         | 0         | 0         | 0         | 0         | 0         | 0         | 0         | 0         | 0          | 0          | 0          | variable surface protein Vir24-like, PIR protein                              |
| PVX_093725 | 0         | 0         | 0         | 0         | 0         | 0         | 0         | 0         | 0         | 0          | 0          | 0          | variable surface protein Vir24-related, PIR protein                           |
| PVX_093730 | 0         | 43.0127   | 0         | 0         | 0         | 0         | 0         | 0         | 0         | 0          | 0          | 0          | VIR protein, PIR protein                                                      |
| PVX_093735 | 0         | 0         | 0         | 0         | 0         | 0         | 0         | 0         | 0         | 0          | 0          | 0          | VIR protein, PIR protein                                                      |
| PVX_094230 | 0         | 0         | 0         | 0         | 0         | 0         | 0         | 0         | 0         | 3.62974    | 2.05575    | 8.35216    | hypothetical protein                                                          |
| PVX_094235 | 0         | 0         | 0         | 0         | 0         | 0         | 0         | 0         | 0         | 0          | 0          | 0          | hypothetical protein                                                          |
| PVX_094240 | 0         | 0         | 0         | 0         | 0         | 0         | 0         | 0         | 0         | 0          | 0          | 0          | variable surface protein Vir12/24-related, PIR protein                        |
| PVX_094243 | 0         | 0         | 0         | 0         | 0         | 0         | 0         | 0         | 0         | 0          | 0          | 0          | VIR protein, pseudogene, PIR protein, pseudogene                              |
| PVX_094245 | 0         | 0         | 0         | 0         | 0         | 0         | 0         | 0         | 0         | 17.2228    | 0          | 0          | variable surface protein Vir12-like, PIR protein                              |
| PVX_094247 | 0         | 0         | 0         | 0         | 0         | 0         | 0         | 0         | 0         | 0          | 0          | 0          | Plasmodium exported protein, unknown function                                 |
| PVX_094250 | 0         | 0         | 0         | 0         | 0         | 0         | 0         | 0         | 0         | 0          | 0          | 0          | VIR protein, PIR protein                                                      |
| PVX_094255 | 0         | 0         | 0         | 0         | 0         | 0         | 0         | 0         | 4.12504   | 0          | 0          | 0          | reticulocyte binding protein 2b (RBP2b)                                       |
| PVX_094260 | 0         | 67.1656   | 0         | 0         | 0         | 0         | 0         | 0         | 0         | 0          | 0          | 0          | VIR protein, pseudogene, PIR protein, pseudogene                              |
| PVX_094265 | 0         | 0         | 0         | 0         | 7.53926   | 0         | 0         | 0         | 9.00976   | 0          | 4.73399    | 0          | cytoadherence-linked asexual protein (CLAG), putative                         |
| PVX_094270 | 0         | 0         | 0         | 0         | 0         | 0         | 0         | 0         | 0         | 81.0198    | 0          | 0          | Plasmodium exported protein, unknown function                                 |
| PVX_094275 | 138.695   | 258.192   | 229.896   | 0         | 14.663    | 236.538   | 282.746   | 449.416   | 227.708   | 259.91     | 119.63     | 0          | hypothetical protein                                                          |
| PVX_094277 | 0         | 218.688   | 0         | 0         | 18.061    | 145.663   | 0         | 79.1011   | 43.1639   | 50.0484    | 113.395    | 0          | Plasmodium exported protein, unknown function                                 |
| PVX_094280 | 147.223   | 257.028   | 0         | 0         | 23.3625   | 0         | 0         | 55.7893   | 77.5833   | 87.9157    | 0          | 0          | Plasmodium exported protein, unknown function                                 |
| PVX_094285 | 120.326   | 252.237   | 0         | 0         | 0         | 0         | 184.409   | 0         | 91.2234   | 126.789    | 23.9529    | 0          | Pv-fam-h protein                                                              |
| PVX_094290 | 0         | 0         | 0         | 0         | 0         | 579.469   | 0         | 157.07    | 42.8443   | 79.4047    | 22.5005    | 0          | Pv-fam-h protein                                                              |
| PVX_094295 | 0         | 0         | 0         | 0         | 0         | 0         | 0         | 0         | 0         | 84.0742    | 71.4741    | 194.16     | Pv-fam-h protein                                                              |
| PVX_094300 | 60.1281   | 209.831   | 0         | 96.0354   | 9.53144   | 153.744   | 45.9431   | 83.487    | 34.1677   | 84.5154    | 53.8562    | 97.2999    | Plasmodium exported protein, unknown function                                 |
| PVX_094303 | 312.98    | 273.224   | 584.157   | 250.282   | 99.3438   | 0         | 239.511   | 326.08    | 148.258   | 219.908    | 311.502    | 126.789    | Pvstp1, putative                                                              |
| PVX_094305 | 0         | 0         | 0         | 0         | 0         | 0         | 0         | 0         | 28.1746   | 0          | 0          | 0          | tryptophan-rich antigen                                                       |
| PVX_094310 | 0         | 0         | 0         | 0         | 0         | 0         | 0         | 0         | 0         | 0          | 0          | 0          | hypothetical protein, conserved                                               |
| PVX_094315 | 0         | 489.958   | 0         | 374.235   | 37.1309   | 599.213   | 0         | 162.409   | 88.6004   | 369.446    | 162.852    | 0          | RNA-binding protein, putative                                                 |
| PVX_094325 | 0         | 0         | 0         | 0         | 0         | 0         | 0         | 0         | 151.611   | 70.174     | 0          | 0          | hypothetical protein, conserved                                               |
| PVX_094330 | 0         | 0         | 0         | 0         | 20.8383   | 0         | 100.47    | 0         | 24.8843   | 69.2172    | 65.3595    | 0          | hypothetical protein, conserved                                               |
| PVX_094335 | 0         | 0         | 84.9069   | 109.135   | 0         | 0         | 0         | 12.9416   | 12.0038   | 47.5966    | 0          | 0          | hypothetical protein, conserved                                               |
| PVX_094340 | 0         | 12.0592   | 42.9312   | 0         | 0         | 0         | 0         | 23.9912   | 13.092    | 18.2185    | 27.5166    | 0          | Dnaj protein, putative                                                        |
| PVX_094345 | 177.652   | 0         | 0         | 0         | 0         | 0         | 0         | 0         | 134.737   | 249.52     | 106.101    | 0          | hypothetical protein, conserved                                               |
| PVX_094350 | 0         | 18.0528   | 0         | 0         | 0         | 0         | 0         | 0         | 9.79896   | 9.08977    | 10.2972    | 0          | hypothetical protein, conserved                                               |
| PVX_094355 | 0         | 0         | 0         | 0         | 0         | 0         | 0         | 0         | 0         | 0          | 0          | 0          | conserved Plasmodium protein, unknown function                                |
| PVX_094360 | 194.653   | 0         | 0         | 0         | 0         | 0         | 299.031   | 0         | 0         | 68.3442    | 0          | 0          | hypothetical protein, conserved                                               |
| PVX_094365 | 0         | 0         | 0         | 0         | 0         | 0         | 0         | 0         | 56.1059   | 0          | 0          | 0          | N-acetyltransferase, putative                                                 |
| PVX_094370 | 0         | 12.6838   | 0         | 0         | 0         | 0         | 0         | 0         | 0         | 0          | 0          | 0          | hypothetical protein, conserved                                               |
| PVX_094375 | 439.228   | 736.287   | 0         | 0         | 139.449   | 0         | 268.981   | 488.166   | 332.92    | 617.195    | 297.268    | 0          | 40S ribosomal protein S20e, putative                                          |
| PVX_094380 | 0         | 31.6971   | 0         | 0         | 0         | 0         | 0         | 0         | 0         | 0          | 0          | 0          | inner membrane complex protein 1c, putative (IMC1c)                           |
| PVX_094385 | 24.0913   | 16.8132   | 0         | 76.9434   | 15.2795   | 0         | 0         | 0         | 36.5048   | 33.8635    | 28.771     | 0          | hypothetical protein, conserved                                               |
| PVX_094390 | 22.4815   | 47.0681   | 0         | 0         | 21.3785   | 0         | 34.3473   | 0         | 34.0651   | 23.7007    | 40.2726    | 36.372     | U5 small nuclear ribonuclear protein, putative                                |
| PVX_094395 | 0         | 0         | 0         | 0         | 0         | 0         | 0         | 0         | 0         | 0          | 31.5463    | 0          | hypothetical protein, conserved                                               |
| PVX_094400 | 517.484   | 813.687   | 0         | 0         | 205.578   | 0         | 594.985   | 719.219   | 490.434   | 499.817    | 489.321    | 209.935    | 60S ribosomal protein L13a, putative                                          |
| PVX_094405 | 11.2179   | 15.6552   | 0         | 0         | 3.58484   | 0         | 17.1326   | 0         | 12.7474   | 19.7115    | 13.3967    | 0          | hypothetical protein, conserved                                               |
| PVX_094410 | 0         | 0         | 0         | 0         | 0         | 0         | 0         | 0         | 0         | 0          | 5.43615    | 0          | E3 ubiquitin-protein ligase, putative                                         |
| PVX_094415 | 112.676   | 131.083   | 0         | 120.001   | 95.2778   | 0         | 229.64    | 260.768   | 142.292   | 118.778    | 112.138    | 60.7907    | RNA-binding protein, putative                                                 |
| PVX_094420 | 0         | 0         | 0         | 0         | 0         | 0         | 0         | 109.171   | 0         | 0          | 15.6435    | 0          | hypothetical protein, conserved                                               |
| PVX_094425 | 30.1248   | 0         | 0         | 0         | 0         | 0         | 0         | 0         | 0         | 0          | 0          | 0          | hypothetical protein, conserved                                               |
| PVX_094430 | 0         | 0         | 0         | 0         | 0         | 0         | 0         | 0         | 0         | 0          | 29.5082    | 0          | hypothetical protein, conserved                                               |
| PVX_094435 | 0         | 0         | 0         | 0         | 0         | 0         | 0         | 0         | 41.2288   | 76.4145    | 21.6526    | 0          | ADP/ATP carrier protein, putative                                             |
| PVX_094440 | 0         | 0         | 0         | 0         | 0         | 0         | 0         | 0         | 43.9555   | 81.4612    | 46.1674    | 0          | hypothetical protein, conserved                                               |

| Gene ID    | Patient 1 | Patient 2 | Patient 3 | Patient 4 | Patient 5 | Patient 6 | Patient 7 | Patient 8 | Patient 9 | Patient 10 | Patient 11 | Patient 12 | Gene Description                                                  |
|------------|-----------|-----------|-----------|-----------|-----------|-----------|-----------|-----------|-----------|------------|------------|------------|-------------------------------------------------------------------|
| Patient    |           |           |           |           |           |           |           |           |           |            |            |            |                                                                   |
| PVX_094445 | 43.7887   | 91.7028   | 0         | 139.931   | 13.8873   | 0         | 0         | 0         | 49.7704   | 15.3861    | 78.4437    | 0          | methionine-tRNA ligase, putative                                  |
| PVX_094450 | 26.8849   | 75.054    | 0         | 0         | 0         | 0         | 0         | 0         | 20.3693   | 47.2372    | 16.0537    | 0          | hypothetical protein, conserved                                   |
| PVX_094455 | 0         | 0         | 0         | 0         | 0         | 0         | 0         | 0         | 0         | 0          | 61.9257    | 0          | hypothetical protein                                              |
| PVX_094460 | 0         | 0         | 0         | 0         | 0         | 0         | 0         | 0         | 0         | 0          | 0          | 0          | hypothetical protein, conserved                                   |
| PVX_094462 | 0         | 0         | 0         | 0         | 0         | 0         | 0         | 0         | 0         | 0          | 0          | 0          | conserved Plasmodium protein, unknown function                    |
| PVX_094465 | 40.5245   | 0         | 50.3421   | 0         | 0         | 0         | 0         | 0         | 15.351    | 7.12044    | 24.198     | 0          | regulator of nonsense transcripts, putative                       |
| PVX_094470 | 0         | 31.7327   | 0         | 0         | 0         | 0         | 0         | 0         | 86.1116   | 0          | 45.2401    | 0          | hypothetical protein                                              |
| PVX_094480 | 0         | 0         | 0         | 0         | 0         | 0         | 0         | 0         | 16.6881   | 30.954     | 0          | 0          | Plasmodium exported protein, unknown function                     |
| PVX_094485 | 0         | 0         | 0         | 0         | 0         | 0         | 0         | 0         | 0         | 0          | 0          | 0          | hypothetical protein, conserved                                   |
| PVX_094490 | 0         | 0         | 155.809   | 0         | 0         | 0         | 0         | 0         | 0         | 22.0069    | 99.7441    | 0          | hypothetical protein, conserved                                   |
| PVX_094495 | 0         | 0         | 0         | 0         | 0         | 0         | 0         | 0         | 0         | 0          | 0          | 0          | hypothetical protein, conserved                                   |
| PVX_094500 | 0         | 0         | 0         | 0         | 0         | 0         | 0         | 0         | 0         | 0          | 0          | 0          | CCR4-NOT transcription complex subunit 5, putative                |
| PVX_094505 | 253.61    | 0         | 315.995   | 0         | 80.5948   | 0         | 0         | 0         | 144.209   | 89.0744    | 100.971    | 0          | DNA/RNA-binding protein Alba 3, putative (ALBA3)                  |
| PVX_094510 | 0         | 0         | 0         | 0         | 0         | 0         | 0         | 0         | 0         | 0          | 0          | 0          | hypothetical protein                                              |
| PVX_094515 | 65.4011   | 0         | 0         | 0         | 0         | 0         | 0         | 0         | 0         | 0          | 6.50882    | 0          | hypothetical protein, conserved                                   |
| PVX_094520 | 0         | 0         | 337.598   | 0         | 0         | 0         | 0         | 0         | 0         | 0          | 0          | 0          | hypothetical protein, conserved                                   |
| PVX_094525 | 0         | 0         | 0         | 0         | 75.2905   | 0         | 0         | 657.476   | 179.276   | 248.828    | 94.0857    | 0          | phosducin-like protein, putative (PhLP1)                          |
| PVX_094530 | 61.1136   | 21.3272   | 0         | 0         | 9.68777   | 0         | 46.6968   | 84.8557   | 11.5759   | 32.2126    | 30.4105    | 49.448     | hypothetical protein                                              |
| PVX_094535 | 345.39    | 826.711   | 122.69    | 630.799   | 156.505   | 757.417   | 301.794   | 616.705   | 579.533   | 485.429    | 392.852    | 559.216    | RNA-binding protein, putative                                     |
| PVX_094540 | 0         | 0         | 0         | 0         | 0         | 0         | 0         | 0         | 0         | 0          | 40.608     | 0          | PPPDE peptidase, putative                                         |
| PVX_094545 | 0         | 0         | 0         | 0         | 25.9024   | 0         | 0         | 113.355   | 0         | 28.6659    | 0          | 0          | conserved membrane protein, unknown function                      |
| PVX_094550 | 0         | 0         | 0         | 0         | 0         | 0         | 0         | 0         | 0         | 67.7553    | 0          | 0          | dynein light chain 2B, cytoplasmic, putative                      |
| PVX_094555 | 0         | 0         | 0         | 0         | 0         | 0         | 0         | 0         | 0         | 0          | 0          | 0          | Rho-GTPase-activating protein 1, putative                         |
| PVX_094560 | 0         | 0         | 0         | 0         | 0         | 0         | 0         | 0         | 0         | 0          | 0          | 0          | RING zinc finger protein, putative                                |
| PVX_094565 | 99.6855   | 0         | 496.45    | 0         | 0         | 0         | 0         | 0         | 37.7822   | 35.0169    | 79.3739    | 161.628    | hypothetical protein, conserved                                   |
| PVX_094570 | 0         | 224.106   | 0         | 0         | 0         | 0         | 0         | 0         | 121.429   | 0          | 318.486    | 0          | hypothetical protein                                              |
| PVX_094575 | 697.405   | 490.924   | 0         | 0         | 0         | 0         | 0         | 0         | 265.404   | 244.256    | 416.803    | 0          | hypothetical protein, conserved                                   |
| PVX_094580 | 0         | 63.3625   | 0         | 0         | 7.19488   | 116.05    | 0         | 0         | 8.59837   | 7.97637    | 13.5536    | 0          | transcription factor with AP2 domain(s), putative (ApiAP2)        |
| PVX_094585 | 0         | 0         | 0         | 0         | 0         | 0         | 0         | 49.2974   | 0         | 0          | 14.1332    | 0          | hypothetical protein, conserved                                   |
| PVX_094590 | 162.438   | 170.083   | 0         | 0         | 0         | 0         | 62.0791   | 112.783   | 138.468   | 128.424    | 137.413    | 0          | eukaryotic translation initiation factor 3 subunit 7, putative    |
| PVX_094595 | 13.9447   | 19.4612   | 0         | 0         | 0         | 0         | 0         | 19.3589   | 15.8463   | 14.7015    | 13.8776    | 0          | histone deacetylase 2, putative (HDA2)                            |
| PVX_094600 | 16.8907   | 29.4639   | 0         | 0         | 13.3804   | 0         | 25.7942   | 35.1713   | 9.5967    | 26.712     | 20.1713    | 27.3161    | hypothetical protein, conserved                                   |
| PVX_094605 | 0         | 0         | 0         | 0         | 0         | 0         | 0         | 0         | 166.134   | 92.3979    | 139.617    | 142.104    | endonuclease, putative                                            |
| PVX_094610 | 0         | 0         | 0         | 0         | 0         | 0         | 0         | 0         | 71.9442   | 0          | 0          | 0          | hypothetical protein                                              |
| PVX_094615 | 144.519   | 100.89    | 479.122   | 153.96    | 61.1175   | 246.484   | 0         | 133.798   | 146.014   | 169.262    | 191.773    | 0          | 26S protease regulatory subunit 4, putative                       |
| PVX_094620 | 0         | 0         | 0         | 0         | 21.6628   | 0         | 0         | 0         | 0         | 24.0076    | 13.599     | 0          | hypothetical protein, conserved                                   |
| PVX_094625 | 0         | 0         | 0         | 0         | 0         | 0         | 0         | 0         | 0         | 0          | 0          | 0          | hypothetical protein, conserved                                   |
| PVX_094635 | 78.8657   | 55.0787   | 785.068   | 504.542   | 50.0666   | 0         | 0         | 328.669   | 89.6607   | 83.1191    | 408.164    | 127.796    | tubulin beta chain, putative                                      |
| PVX_094640 | 0         | 186.871   | 0         | 0         | 0         | 0         | 0         | 74.3462   | 81.1325   | 75.2358    | 42.6223    | 86.684     | nucleolar protein 5, putative (NOP5)                              |
| PVX_094645 | 173.24    | 483.822   | 430.873   | 0         | 91.6015   | 591.11    | 0         | 401.011   | 262.566   | 243.47     | 91.9558    | 187.038    | RAD protein (Pv-fam-e)                                            |
| PVX_094650 | 0         | 0         | 0         | 0         | 0         | 0         | 0         | 0         | 0         | 0          | 0          | 0          | RAD protein (Pv-fam-e)                                            |
| PVX_094655 | 0         | 111.375   | 0         | 0         | 0         | 0         | 0         | 0         | 60.4053   | 0          | 31.7148    | 0          | RAD protein (Pv-fam-e)                                            |
| PVX_094660 | 170.218   | 119.018   | 0         | 0         | 54.1514   | 0         | 261.288   | 0         | 129.092   | 179.316    | 101.661    | 0          | adenylate kinase 2, putative                                      |
| PVX_094665 | 0         | 159.727   | 0         | 0         | 0         | 0         | 0         | 79.4329   | 21.6707   | 60.2843    | 11.3843    | 0          | diphthine synthase, putative                                      |
| PVX_094670 | 0         | 0         | 0         | 0         | 0         | 0         | 0         | 0         | 0         | 0          | 0          | 0          | hypothetical protein, conserved                                   |
| PVX_094675 | 36.7265   | 51.2706   | 91.29     | 0         | 11.6456   | 0         | 56.1363   | 0         | 55.6552   | 51.6205    | 58.4815    | 0          | hypothetical protein, conserved                                   |
| PVX_094680 | 115.568   | 0         | 0         | 184.727   | 0         | 0         | 0         | 80.254    | 43.7892   | 0          | 23.0038    | 0          | hypothetical protein, conserved                                   |
| PVX_094685 | 0         | 46.8537   | 166.928   | 0         | 42.5843   | 0         | 0         | 0         | 177.979   | 117.87     | 53.4246    | 0          | zinc finger protein, putative                                     |
| PVX_094690 | 0         | 65.751    | 0         | 0         | 0         | 0         | 0         | 130.778   | 107.024   | 99.1976    | 37.4743    | 0          | hypothetical protein, conserved                                   |
| PVX_094695 | 0         | 0         | 0         | 0         | 0         | 0         | 0         | 0         | 0         | 22.7882    | 51.6433    | 0          | protein phosphatase 2C, putative                                  |
| PVX_094700 | 0         | 0         | 0         | 0         | 0         | 0         | 0         | 0         | 0         | 0          | 0          | 0          | tubulin-tyrosine ligase, putative                                 |
| PVX_094705 | 0         | 0         | 0         | 0         | 0         | 0         | 0         | 0         | 8.53773   | 0          | 17.944     | 36.4637    | hypothetical protein, conserved                                   |
| PVX_094710 | 0         | 6.50825   | 0         | 0         | 0         | 0         | 0         | 0         | 0         | 0          | 7.42594    | 0          | kinesin-4, putative                                               |
| PVX_094715 | 84.12     | 0         | 0         | 134.4     | 13.3385   | 0         | 0         | 116.813   | 47.805    | 73.8943    | 33.4874    | 0          | hypothetical protein, conserved                                   |
| PVX_094720 | 0         | 0         | 0         | 0         | 0         | 0         | 0         | 154.722   | 84.4084   | 39.1099    | 66.4936    | 0          | ribosomal protein L43, mitochondrial, putative                    |
| PVX_094725 | 0         | 0         | 0         | 0         | 0         | 0         | 0         | 0         | 49.5452   | 0          | 26.017     | 0          | hypothetical protein, conserved                                   |
| PVX_094730 | 31.5353   | 11.003    | 0         | 0         | 14.9916   | 0         | 0         | 21.8901   | 59.7271   | 22.1644    | 28.2454    | 0          | hypothetical protein, conserved                                   |
| PVX_094735 | 176.252   | 246.493   | 0         | 0         | 0         | 905.297   | 0         | 0         | 66.8372   | 185.667    | 0          | 0          | hypothetical protein, conserved                                   |
| PVX_094740 | 0         | 0         | 0         | 0         | 0         | 0         | 0         | 0         | 0         | 0          | 0          | 0          | hypothetical protein, conserved                                   |
| PVX_094745 | 0         | 0         | 0         | 0         | 0         | 0         | 0         | 0         | 0         | 0          | 0          | 0          | hypothetical protein, conserved                                   |
| PVX_094750 | 73.9689   | 154.893   | 275.796   | 118.165   | 23.4549   | 0         | 169.593   | 0         | 238.197   | 220.928    | 88.3386    | 59.8602    | eukaryotic translation initiation factor 2 beta subunit, putative |
| PVX_094755 | 0         | 64.998    | 0         | 0         | 29.5466   | 0         | 0         | 129.281   | 35.2663   | 32.6878    | 0          | 150.845    | hypothetical protein, conserved                                   |

| Gene ID    | Patient 1 | Patient 2 | Patient 3 | Patient 4 | Patient 5 | Patient 6 | Patient 7 | Patient 8 | Patient 9 | Patient 10 | Patient 11 | Patient 12 | Gene Description                                                  |
|------------|-----------|-----------|-----------|-----------|-----------|-----------|-----------|-----------|-----------|------------|------------|------------|-------------------------------------------------------------------|
| Patient    |           |           |           |           |           |           |           |           |           |            |            |            |                                                                   |
| PVX_094760 | 131.269   | 0         | 327.161   | 0         | 41.7206   | 0         | 0         | 0         | 149.29    | 92.208     | 78.3946    | 213.026    | 50S ribosomal protein L22, mitochondrial, putative                |
| PVX_094765 | 107.596   | 0         | 0         | 0         | 0         | 0         | 329.663   | 0         | 40.7824   | 0          | 42.8366    | 0          | hypothetical protein, conserved                                   |
| PVX_094770 | 0         | 0         | 0         | 0         | 0         | 0         | 0         | 0         | 0         | 0          | 0          | 0          | inner membrane complex sub-compartment protein 1, putative (ISP1) |
| PVX_094775 | 0         | 0         | 0         | 0         | 0         | 0         | 0         | 0         | 29.8493   | 0          | 39.2058    | 0          | hypothetical protein, conserved                                   |
| PVX_094780 | 0         | 0         | 0         | 0         | 0         | 0         | 0         | 0         | 39.316    | 109.31     | 41.2972    | 0          | SNARE domain containing protein                                   |
| PVX_094785 | 0         | 39.2046   | 139.653   | 0         | 0         | 0         | 0         | 0         | 0         | 0          | 44.7085    | 0          | hypothetical protein, conserved                                   |
| PVX_094790 | 289.268   | 0         | 360.607   | 2317.53   | 137.951   | 0         | 887.339   | 201.048   | 274.176   | 203.179    | 374.305    | 0          | proteasome subunit beta type-5, putative                          |
| PVX_094795 | 0         | 0         | 0         | 0         | 0         | 0         | 0         | 0         | 0         | 96.7152    | 164.604    | 0          | hypothetical protein, conserved                                   |
| PVX_094800 | 0         | 0         | 0         | 0         | 0         | 0         | 0         | 0         | 47.4686   | 22.0069    | 12.468     | 0          | hypothetical protein, conserved                                   |
| PVX_094805 | 63.7074   | 44.4837   | 158.476   | 0         | 0         | 0         | 88.4859   | 168.98    | 22.3828   | 76.0862    | 0          | 0          | DNA repair protein RAD23, putative                                |
| PVX_094810 | 65.7918   | 153.048   | 0         | 0         | 41.7086   | 112.123   | 33.5051   | 30.4479   | 124.613   | 61.6533    | 139.682    | 35.4802    | PRE-binding protein, putative (PREBP)                             |
| PVX_094815 | 109.841   | 76.7417   | 0         | 0         | 0         | 0         | 0         | 0         | 0         | 38.5822    | 0          | 0          | heme oxygenase, putative (HO)                                     |
| PVX_094820 | 0         | 0         | 0         | 0         | 23.4065   | 0         | 0         | 51.2499   | 0         | 0          | 7.34637    | 0          | hypothetical protein, conserved                                   |
| PVX_094825 | 0         | 0         | 210.788   | 0         | 0         | 0         | 0         | 0         | 0         | 29.7505    | 33.715     | 0          | hypothetical protein, conserved                                   |
| PVX_094830 | 0         | 0         | 0         | 0         | 0         | 0         | 0         | 0         | 0         | 0          | 0          | 0          | hypothetical protein, conserved                                   |
| PVX_094835 | 62.3319   | 43.5224   | 155.048   | 199.291   | 79.1087   | 0         | 95.3518   | 86.5742   | 118.093   | 87.5987    | 136.479    | 100.958    | ubiquinol-cytochrome c reductase complex subunit, putative        |
| PVX_094840 | 1370.73   | 441.98    | 787.794   | 1350.12   | 200.943   | 0         | 484.557   | 732.554   | 879.229   | 1703.72    | 440.774    | 170.987    | hypoxanthine-guanine phosphoribosyltransferase, putative          |
| PVX_094845 | 0         | 0         | 0         | 0         | 16.4115   | 0         | 0         | 71.8521   | 58.8083   | 18.1784    | 30.8948    | 0          | phosphoglucomutase, putative                                      |
| PVX_094850 | 49.4505   | 34.5225   | 0         | 0         | 31.3702   | 0         | 75.6156   | 137.349   | 206.095   | 191.126    | 88.587     | 0          | GMP synthetase, putative                                          |
| PVX_094855 | 21.3041   | 29.735    | 0         | 0         | 0         | 0         | 32.5473   | 29.5779   | 16.1404   | 14.9731    | 12.7211    | 0          | NLI interacting factor-like phosphatase, putative (NIF4)          |
| PVX_094860 | 42.7226   | 0         | 0         | 0         | 13.5489   | 0         | 0         | 118.654   | 80.9305   | 45.0349    | 85.0375    | 0          | hypothetical protein, conserved                                   |
| PVX_094865 | 67.5546   | 94.3446   | 168.064   | 0         | 64.3111   | 345.855   | 103.358   | 93.833    | 51.1969   | 71.202     | 13.4469    | 109.433    | autophagy-related protein 18, putative (ATG18)                    |
| PVX_094870 | 0         | 0         | 0         | 0         | 0         | 0         | 0         | 0         | 48.9069   | 0          | 12.8457    | 0          | hypothetical protein, conserved                                   |
| PVX_094875 | 25.2325   | 17.6098   | 0         | 0         | 15.9974   | 0         | 0         | 105.1     | 19.1171   | 44.3341    | 15.0669    | 0          | hypothetical protein, conserved                                   |
| PVX_094880 | 0         | 0         | 0         | 0         | 17.248    | 0         | 0         | 37.7708   | 0         | 9.55942    | 10.8293    | 0          | hypothetical protein, conserved                                   |
| PVX_094885 | 84.7975   | 0         | 105.406   | 135.484   | 40.3382   | 216.902   | 64.818    | 58.8771   | 64.2535   | 59.5915    | 42.1964    | 0          | hypothetical protein, conserved                                   |
| PVX_094890 | 0         | 0         | 0         | 0         | 0         | 0         | 0         | 0         | 0         | 0          | 0          | 0          | hypothetical protein, conserved                                   |
| PVX_094895 | 43.7006   | 15.2487   | 0         | 0         | 0         | 0         | 0         | 30.3363   | 8.27712   | 15.3569    | 21.7454    | 0          | phospholipase C-like, putative                                    |
| PVX_094900 | 0         | 0         | 0         | 0         | 0         | 0         | 0         | 0         | 5.72941   | 0          | 18.0633    | 0          | hypothetical protein, conserved                                   |
| PVX_094902 | 0         | 0         | 0         | 0         | 0         | 0         | 0         | 0         | 0         | 0          | 85.2998    | 0          | hypothetical protein, conserved                                   |
| PVX_094905 | 0         | 0         | 0         | 0         | 0         | 0         | 0         | 0         | 0         | 0          | 0          | 0          | hypothetical protein, conserved                                   |
| PVX_094910 | 29.9133   | 20.8779   | 0         | 0         | 0         | 0         | 0         | 0         | 33.9964   | 10.5115    | 23.8161    | 0          | initiation factor 2 subunit family, putative                      |
| PVX_094915 | 0         | 0         | 0         | 0         | 0         | 0         | 0         | 0         | 0         | 0          | 0          | 0          | GDP-L-fucose synthase, putative (FS)                              |
| PVX_094920 | 58.2544   | 0         | 0         | 0         | 0         | 0         | 0         | 0         | 0         | 0          | 0          | 31.4132    | hypothetical protein, conserved                                   |
| PVX_094925 | 0         | 0         | 0         | 0         | 0         | 0         | 0         | 0         | 14.2113   | 13.1809    | 0          | 0          | male gamete fusion factor HAP2, putative (HAP2)                   |
| PVX_094930 | 0         | 8.56176   | 0         | 39.1747   | 15.5533   | 0         | 0         | 51.1006   | 32.5336   | 17.2479    | 48.8434    | 0          | hypothetical protein, conserved                                   |
| PVX_094935 | 0         | 0         | 0         | 0         | 20.3595   | 0         | 0         | 178.241   | 0         | 0          | 76.6318    | 0          | cyclin dependent kinase 7 (cdk7), putative                        |
| PVX_094940 | 0         | 0         | 0         | 0         | 0         | 0         | 0         | 0         | 7.9009    | 21.9886    | 4.15143    | 0          | hypothetical protein, conserved                                   |
| PVX_094945 | 33.7552   | 39.256    | 55.8962   | 35.923    | 14.2623   | 0         | 17.1843   | 0         | 46.8816   | 31.6335    | 49.2693    | 18.198     | transcriptional coactivator ADA2, putative (ADA2)                 |
| PVX_094950 | 77.8368   | 0         | 193.701   | 248.973   | 0         | 0         | 238.258   | 108.126   | 88.4903   | 136.725    | 77.469     | 0          | prohibitin, putative                                              |
| PVX_094955 | 0         | 0         | 0         | 0         | 0         | 0         | 0         | 0         | 0         | 0          | 0          | 0          | hypothetical protein, conserved                                   |
| PVX_094965 | 0         | 0         | 0         | 0         | 0         | 0         | 0         | 0         | 0         | 0          | 0          | 0          | hypothetical protein, conserved                                   |
| PVX_094970 | 111.622   | 0         | 0         | 0         | 0         | 0         | 0         | 0         | 0         | 0          | 44.4396    | 181.042    | FAD synthetase, putative                                          |
| PVX_094975 | 56.9023   | 0         | 0         | 0         | 0         | 0         | 0         | 0         | 0         | 0          | 45.3055    | 0          | hypothetical protein, conserved                                   |
| PVX_094980 | 211.193   | 88.4549   | 0         | 0         | 26.7905   | 216.082   | 0         | 58.6547   | 96.0162   | 89.0497    | 126.111    | 0          | cysteine-tRNA ligase, putative (CysRS)                            |
| PVX_094985 | 383.185   | 107.041   | 0         | 0         | 24.3246   | 0         | 234.577   | 0         | 87.1256   | 134.619    | 106.785    | 0          | methionine aminopeptidase 1b, putative (METAP1b)                  |
| PVX_094990 | 47.2571   | 32.9902   | 0         | 0         | 14.9886   | 0         | 72.2565   | 0         | 17.9046   | 66.4182    | 94.0638    | 0          | hypothetical protein, conserved                                   |
| PVX_094995 | 0         | 0         | 0         | 0         | 0         | 0         | 0         | 0         | 0         | 0          | 35.6094    | 96.5776    | hypothetical protein, conserved                                   |
| PVX_095000 | 116.244   | 40.5806   | 0         | 0         | 73.7578   | 0         | 0         | 0         | 154.159   | 306.314    | 80.9839    | 0          | heat shock protein 60, putative                                   |
| PVX_095005 | 0         | 0         | 0         | 0         | 0         | 0         | 0         | 0         | 42.1517   | 39.0613    | 44.274     | 0          | hypothetical protein                                              |
| PVX_095010 | 111.205   | 0         | 0         | 0         | 0         | 0         | 0         | 0         | 42.1517   | 39.0613    | 110.685    | 180.365    | ribonucleotide reductase small subunit, putative                  |
| PVX_095015 | 4184.98   | 2267.91   | 3573.59   | 3195.34   | 1387.31   | 3197.36   | 2866.56   | 4251.02   | 4118.24   | 5640       | 3431.56    | 2225.72    | enolase, putative                                                 |
| PVX_095020 | 0         | 0         | 0         | 0         | 0         | 0         | 0         | 0         | 0         | 0          | 0          | 0          | hypothetical protein, conserved                                   |
| PVX_095025 | 0         | 0         | 0         | 0         | 0         | 0         | 90.8502   | 82.4924   | 22.5052   | 0          | 0          | 0          | hypothetical protein, conserved                                   |
| PVX_095030 | 259.438   | 144.9     | 129.031   | 165.849   | 32.9182   | 0         | 158.697   | 0         | 117.958   | 72.9245    | 103.281    | 0          | hypothetical protein, conserved                                   |
| PVX_095035 | 0         | 0         | 0         | 0         | 0         | 0         | 0         | 0         | 11.8429   | 0          | 12.4447    | 0          | hypothetical protein, conserved                                   |
| PVX_095040 | 32.7724   | 22.8742   | 0         | 0         | 10.3908   | 0         | 50.0862   | 45.5051   | 0         | 34.5479    | 26.0925    | 0          | hypothetical protein, conserved                                   |
| PVX_095045 | 0         | 52.1921   | 0         | 119.449   | 23.7099   | 382.461   | 114.292   | 103.828   | 14.1638   | 39.4107    | 96.7396    | 60.5111    | hypothetical protein, conserved                                   |
| PVX_095050 | 108.427   | 113.55    | 134.824   | 0         | 17.1979   | 277.442   | 82.9114   | 0         | 102.706   | 114.289    | 97.1203    | 0          | survival motor neuron-like protein, putative (SMN)                |
| PVX_095055 | 0         | 0         | 0         | 0         | 9.38007   | 0         | 0         | 0         | 0         | 0          | 5.8906     | 0          | Rh5 interacting protein, putative (RIPR)                          |
| PVX_095060 | 0         | 65.6818   | 0         | 0         | 0         | 0         | 0         | 0         | 35.6371   | 33.0311    | 18.7175    | 0          | conserved protein, unknown function                               |
| PVX_095065 | 0         | 0         | 0         | 0         | 0         | 0         | 0         | 0         | 28.3377   | 0          | 14.8853    | 0          | hypothetical protein, conserved                                   |

| Gene ID    | Patient | Patient 1 | Patient 2 | Patient 3 | Patient 4 | Patient 5 | Patient 6 | Patient 7 | Patient 8 | Patient 9 | Patient 10 | Patient 11 | Patient 12 | Gene Description                                                  |
|------------|---------|-----------|-----------|-----------|-----------|-----------|-----------|-----------|-----------|-----------|------------|------------|------------|-------------------------------------------------------------------|
| PVX_095070 | 0       | 15.5681   | 0         | 0         | 0         | 0         | 114.053   | 0         | 0         | 0         | 31.3568    | 44.4015    | 0          | hypothetical protein, conserved                                   |
| PVX_095075 | 0       | 178.594   | 638.12    | 0         | 0         | 0         | 0         | 355.046   | 0         | 0         | 0          | 101.599    | 415.503    | translation machinery-associated protein 7, putative (TMA7)       |
| PVX_095080 | 1378.58 | 1219.73   | 1372.81   | 1176.36   | 262.635   | 1412.59   | 1547.97   | 1532.24   | 1602.25   | 1872.54   | 1372.09    | 595.923    | 0          | 40S ribosomal protein S3A, putative                               |
| PVX_095085 | 0       | 0         | 0         | 0         | 0         | 0         | 0         | 0         | 0         | 0         | 0          | 0          | 0          | hypothetical protein                                              |
| PVX_095095 | 0       | 15.546    | 0         | 0         | 3.53006   | 0         | 0         | 0         | 0         | 3.91482   | 6.65164    | 0          | 0          | hypothetical protein, conserved                                   |
| PVX_095100 | 0       | 0         | 0         | 0         | 0         | 0         | 0         | 0         | 0         | 0         | 8.03144    | 0          | 0          | hypothetical protein, conserved                                   |
| PVX_095105 | 0       | 0         | 268.954   | 0         | 0         | 0         | 0         | 150.05    | 40.9301   | 37.9308   | 107.479    | 0          | 0          | iron-sulfur assembly protein, putative                            |
| PVX_095115 | 0       | 59.9898   | 0         | 0         | 13.627    | 0         | 65.6906   | 0         | 0         | 15.0981   | 17.1055    | 0          | 0          | D123 (regulator of eIF2), putative                                |
| PVX_095120 | 0       | 0         | 0         | 0         | 37.6878   | 0         | 0         | 0         | 22.5052   | 62.6042   | 94.5802    | 96.1923    | 0          | diacylglycerol O-acyltransferase, putative (DGAT)                 |
| PVX_095125 | 0       | 0         | 0         | 0         | 0         | 0         | 0         | 0         | 0         | 0         | 0          | 0          | 0          | hypothetical protein, conserved                                   |
| PVX_095130 | 0       | 42.3993   | 0         | 0         | 0         | 0         | 0         | 84.3406   | 46.0186   | 0         | 60.4364    | 0          | 0          | mRNA capping enzyme, putative                                     |
| PVX_095135 | 326.167 | 285.047   | 813.636   | 0         | 285.3     | 418.664   | 500.56    | 1360.41   | 1082.16   | 658.592   | 616.859    | 397.341    | 0          | cyclophilin, putative                                             |
| PVX_095140 | 25.6226 | 17.8822   | 0         | 0         | 16.2449   | 0         | 0         | 0         | 29.1191   | 18.0078   | 20.3998    | 0          | 0          | cyclic amine resistance locus protein, putative (CARL)            |
| PVX_095145 | 0       | 16.5582   | 0         | 0         | 7.51983   | 0         | 18.121    | 0         | 13.4826   | 8.33928   | 16.5308    | 0          | 0          | hypothetical protein, conserved                                   |
| PVX_095150 | 16.4306 | 11.4657   | 0         | 104.93    | 0         | 0         | 0         | 45.6211   | 6.22386   | 11.5481   | 42.5143    | 0          | 0          | hypothetical protein, conserved                                   |
| PVX_095155 | 42.9687 | 0         | 0         | 0         | 13.627    | 0         | 0         | 16.2794   | 15.0981   | 8.55275   | 0          | 0          | 0          | ATP-dependent RNA helicase, putative                              |
| PVX_095160 | 186.853 | 26.0851   | 0         | 0         | 23.7      | 0         | 57.122    | 259.461   | 84.9473   | 65.6571   | 200.837    | 60.4858    | 0          | hypothetical protein, conserved                                   |
| PVX_095165 | 0       | 0         | 0         | 0         | 0         | 0         | 0         | 0         | 0         | 0         | 45.6351    | 0          | 0          | protein kinase, putative                                          |
| PVX_095170 | 0       | 0         | 71.1967   | 0         | 0         | 0         | 0         | 39.7785   | 21.7063   | 30.202    | 45.6193    | 46.3587    | 0          | hypothetical protein, conserved                                   |
| PVX_095175 | 0       | 49.1787   | 0         | 0         | 0         | 0         | 107.76    | 0         | 53.3735   | 24.7422   | 0          | 0          | 0          | N-acetylglucosamine-1-phosphate transferase, putative             |
| PVX_095180 | 0       | 39.4209   | 0         | 0         | 23.8724   | 0         | 57.5298   | 0         | 14.2656   | 0         | 11.2436    | 0          | 0          | hypothetical protein, conserved                                   |
| PVX_095185 | 0       | 0         | 0         | 0         | 0         | 0         | 0         | 0         | 22.0657   | 81.8432   | 23.1834    | 0          | 0          | hypothetical protein, conserved                                   |
| PVX_095190 | 1021.31 | 714.107   | 424.7     | 0         | 216.606   | 874.145   | 0         | 236.67    | 580.916   | 597.72    | 474.416    | 276.537    | 0          | histone H2A, putative                                             |
| PVX_095195 | 0       | 56.8852   | 0         | 0         | 25.8552   | 0         | 0         | 0         | 0         | 57.2276   | 48.6391    | 0          | 0          | ATP-dependent RNA helicase DDX6, putative (DOZI)                  |
| PVX_095200 | 0       | 0         | 0         | 0         | 20.823    | 0         | 200.793   | 0         | 74.5982   | 92.222    | 26.1246    | 0          | 0          | signal peptidase complex subunit 2, putative                      |
| PVX_095205 | 137.378 | 191.776   | 170.727   | 0         | 65.3378   | 0         | 157.474   | 143.066   | 169.145   | 181.024   | 211.918    | 55.5833    | 0          | hypothetical protein, conserved                                   |
| PVX_095210 | 117.233 | 0         | 291.583   | 0         | 74.3868   | 0         | 0         | 244.233   | 111.051   | 144.163   | 93.3412    | 0          | 0          | nicotinamidase, putative                                          |
| PVX_095215 | 0       | 0         | 0         | 0         | 2.83929   | 0         | 13.6837   | 0         | 0         | 0         | 0          | 0          | 0          | oocyst capsule protein, putative (Cap380)                         |
| PVX_095220 | 127.415 | 44.4837   | 158.476   | 203.697   | 60.6429   | 652.242   | 97.4603   | 88.4859   | 241.4     | 156.68    | 126.81     | 0          | 0          | T-complex protein 1, epsilon subunit, putative                    |
| PVX_095225 | 0       | 0         | 0         | 0         | 0         | 0         | 0         | 0         | 0         | 0         | 0          | 0          | 0          | CPW-WPC family protein, putative                                  |
| PVX_095230 | 0       | 0         | 0         | 301.222   | 29.8892   | 0         | 0         | 130.778   | 35.6746   | 33.0659   | 0          | 152.594    | 0          | vesicle transport protein Sec22, putative                         |
| PVX_095235 | 320.858 | 0         | 532.751   | 0         | 101.916   | 0         | 163.843   | 148.614   | 162.154   | 225.41    | 170.322    | 173.446    | 0          | protein phosphatase inhibitor 2, putative                         |
| PVX_095240 | 0       | 0         | 0         | 0         | 0         | 0         | 0         | 236.193   | 32.2162   | 0         | 33.8431    | 137.774    | 0          | hypothetical protein, conserved                                   |
| PVX_095245 | 0       | 0         | 0         | 0         | 0         | 0         | 0         | 104.05    | 0         | 26.3155   | 14.9102    | 0          | 0          | hypothetical protein, conserved                                   |
| PVX_095250 | 0       | 40.4934   | 0         | 0         | 7.35595   | 0         | 17.726    | 16.1123   | 13.1889   | 16.3152   | 27.7211    | 0          | 0          | ABC transporter, putative                                         |
| PVX_095255 | 668.466 | 468.387   | 0         | 0         | 0         | 0         | 0         | 1141.95   | 938.155   | 532.426   | 0          | 0          | 0          | elongation factor 1, putative                                     |
| PVX_095260 | 70.7594 | 0         | 0         | 0         | 22.4558   | 0         | 108.273   | 294.862   | 0         | 24.8595   | 28.1698    | 0          | 0          | RNA-binding protein, putative                                     |
| PVX_095265 | 48.9737 | 17.0893   | 60.8454   | 0         | 7.76219   | 0         | 67.9954   | 9.27605   | 8.60484   | 29.2433   | 0          | 0          | 0          | kinesin-8, putative                                               |
| PVX_095270 | 0       | 0         | 0         | 0         | 0         | 0         | 0         | 47.0684   | 43.6109   | 24.7173   | 0          | 0          | 0          | ubiquitin-conjugating enzyme E2, putative                         |
| PVX_095275 | 0       | 27.6076   | 98.3178   | 0         | 0         | 0         | 109.841   | 74.9201   | 83.3838   | 39.3618   | 64.0182    | 0          | 0          | endonuclease/exonuclease/phosphatase domain containing protein    |
| PVX_095280 | 0       | 122.281   | 436.376   | 0         | 55.6392   | 0         | 0         | 0         | 0         | 69.6283   | 0          | 0          | 0          | E3 ubiquitin-protein ligase RBX1, putative (RBX1)                 |
| PVX_095285 | 0       | 0         | 0         | 0         | 0         | 0         | 0         | 0         | 0         | 10.8597   | 0          | 0          | 0          | potential phospholipid-transporting ATPase, putative              |
| PVX_095290 | 0       | 116.314   | 207.249   | 0         | 52.8674   | 0         | 127.464   | 115.677   | 63.1126   | 0         | 116.026    | 0          | 0          | hypothetical protein, conserved                                   |
| PVX_095295 | 92.5707 | 0         | 0         | 0         | 0         | 0         | 141.746   | 0         | 0         | 32.5189   | 128.989    | 0          | 0          | triosephosphate isomerase, putative                               |
| PVX_095300 | 0       | 49.3264   | 0         | 0         | 11.2038   | 0         | 0         | 0         | 53.5452   | 0         | 21.0993    | 0          | 0          | RNA-metabolising metallo-beta-lactamase domain containing protein |
| PVX_095305 | 0       | 0         | 0         | 0         | 1.98493   | 0         | 0         | 0         | 0         | 0         | 2.49373    | 0          | 0          | hypothetical protein, conserved                                   |
| PVX_095310 | 0       | 0         | 0         | 0         | 0         | 0         | 0         | 0         | 0         | 0         | 0          | 0          | 0          | hypothetical protein, conserved                                   |
| PVX_095315 | 31.9647 | 44.6205   | 0         | 0         | 0         | 0         | 0         | 44.3833   | 24.2188   | 33.6966   | 31.8118    | 51.7283    | 0          | hypothetical protein, conserved                                   |
| PVX_095320 | 38.704  | 18.0049   | 64.0941   | 41.1916   | 16.354    | 0         | 19.7047   | 35.8206   | 39.0949   | 22.6694   | 51.3571    | 20.867     | 0          | DNA-directed RNA polymerase II subunit RPB1, putative (RPB1)      |
| PVX_095325 | 102.424 | 143.106   | 0         | 327.844   | 32.5298   | 0         | 0         | 0         | 155.283   | 71.9566   | 0          | 0          | 0          | stomatin-like protein                                             |
| PVX_095330 | 0       | 0         | 0         | 0         | 43.8499   | 0         | 0         | 0         | 0         | 0         | 27.461     | 0          | 0          | hypothetical protein, conserved                                   |
| PVX_095335 | 0       | 36.7149   | 0         | 0         | 0         | 0         | 0         | 0         | 0         | 0         | 10.4677    | 0          | 0          | hypothetical protein, conserved                                   |
| PVX_095340 | 0       | 0         | 0         | 0         | 101.189   | 0         | 0         | 147.555   | 120.749   | 74.602    | 126.832    | 0          | 0          | 26S proteasome regulatory subunit p27, putative                   |
| PVX_095345 | 0       | 8.35553   | 0         | 76.4619   | 15.1786   | 0         | 18.2884   | 0         | 22.6785   | 8.41627   | 26.2168    | 0          | 0          | hypothetical protein, conserved                                   |
| PVX_095350 | 352.505 | 1109.22   | 439.831   | 1696.01   | 224.318   | 0         | 270.603   | 1225.37   | 1136.23   | 990.225   | 807.034    | 286.39     | 0          | 40S ribosomal protein S11, putative                               |
| PVX_095355 | 0       | 0         | 72.7125   | 0         | 0         | 0         | 0         | 0         | 0         | 0         | 9.06331    | 0          | 0          | kinesin-5 (EG5)                                                   |
| PVX_095360 | 0       | 45.755    | 0         | 0         | 0         | 0         | 0         | 0         | 0         | 0         | 65.2159    | 0          | 0          | hypothetical protein, conserved                                   |
| PVX_095365 | 10.307  | 7.19194   | 0         | 32.9061   | 3.26614   | 0         | 15.741    | 42.9251   | 23.4246   | 32.6      | 18.4634    | 0          | 0          | hypothetical protein, conserved                                   |
| PVX_095370 | 0       | 0         | 0         | 143.887   | 0         | 0         | 34.4166   | 0         | 17.0669   | 7.91614   | 17.935     | 0          | 0          | protein kinase domain containing protein                          |
| PVX_095375 | 0       | 0         | 0         | 0         | 0         | 0         | 0         | 0         | 55.8616   | 25.9059   | 22.0119    | 0          | 0          | 6-cysteine protein                                                |
| PVX_095380 | 174.833 | 61.0573   | 0         | 279.691   | 111.013   | 0         | 401.496   | 364.335   | 331.293   | 245.673   | 348.019    | 566.747    | 0          | proteasome subunit alpha type-3, putative                         |
| PVX_095385 | 66.4017 | 46.3666   | 0         | 0         | 0         | 0         | 92.2306   | 50.3228   | 0         | 0         | 52.8696    | 0          | 0          | E3 ubiquitin-protein ligase, putative                             |

| Gene ID     | Patient 1 | Patient 2 | Patient 3 | Patient 4 | Patient 5 | Patient 6 | Patient 7 | Patient 8 | Patient 9 | Patient 10 | Patient 11 | Patient 12 | Gene Description                                                                |                          |
|-------------|-----------|-----------|-----------|-----------|-----------|-----------|-----------|-----------|-----------|------------|------------|------------|---------------------------------------------------------------------------------|--------------------------|
| Patient     |           |           |           |           |           |           |           |           |           |            |            |            |                                                                                 |                          |
| PVX_095390  | 669.932   | 2187.46   | 0         | 1434.46   | 640.212   | 0         | 1373.48   | 931.956   | 1185.94   | 1411.1     | 1333.79    | 726.673    | 40S ribosomal protein S15Aa, putative                                           |                          |
| PVX_095395  | 0         | 0         | 0         | 0         | 0         | 0         | 0         | 0         | 0         | 0          | 0          | 0          | hypothetical protein, conserved                                                 |                          |
| PVX_095400  | 0         | 130.185   | 0         | 597.252   | 59.2433   | 0         | 0         | 0         | 211.787   | 0          | 37.0596    | 0          | hypothetical protein, conserved                                                 |                          |
| PVX_095405  | 88.3661   | 185.164   | 0         | 282.736   | 28.0554   | 0         | 0         | 0         | 100.468   | 217.297    | 105.54     | 0          | transporter, putative                                                           |                          |
| PVX_095410  | 70.3699   | 0         | 175.082   | 450.083   | 66.9958   | 0         | 0         | 195.492   | 26.6658   | 0          | 84.0441    | 114.002    | hypothetical protein, conserved                                                 |                          |
| PVX_095415  | 0         | 0         | 0         | 0         | 0         | 0         | 55.1172   | 100.145   | 27.3229   | 0          | 64.5987    | 58.3633    | hypothetical protein, conserved                                                 |                          |
| PVX_095420  | 181.19    | 42.1703   | 150.227   | 193.094   | 38.3246   | 0         | 92.386    | 167.77    | 228.85    | 190.98     | 96.1761    | 293.454    | inorganic pyrophosphatase, putative                                             |                          |
| PVX_095425  | 0         | 0         | 0         | 99.7801   | 0         | 0         | 0         | 0         | 0         | 16.4724    | 34.2087    | 25.2735    | hypothetical protein, conserved                                                 |                          |
| PVX_095430  | 115.961   | 0         | 0         | 0         | 0         | 0         | 177.694   | 0         | 131.867   | 122.192    | 92.3348    | 376.205    | hypothetical protein, conserved                                                 |                          |
| PVX_095435  | 0         | 0         | 0         | 0         | 0         | 0         | 0         | 0         | 0         | 0          | 0          | 0          | microneme associated antigen, putative (MA)                                     |                          |
| PVX_095440  | 0         | 0         | 0         | 0         | 0         | 0         | 0         | 0         | 52.2971   | 0          | 82.383     | 0          | hypothetical protein, conserved                                                 |                          |
| PVX_095445  | 0         | 82.3056   | 0         | 0         | 37.425    | 0         | 0         | 163.693   | 44.6503   | 0          | 23.4483    | 0          | zinc finger protein, putative                                                   |                          |
| PVX_095450  | 0         | 0         | 0         | 0         | 0         | 0         | 0         | 0         | 10.8116   | 0          | 0          | 0          | hypothetical protein, conserved                                                 |                          |
| PVX_095452  | 0         | 14.4846   | 0         | 0         | 13.1577   | 0         | 31.7089   | 0         | 23.5873   | 7.29382    | 78.493     | 0          | hypothetical protein                                                            |                          |
| PVX_095455  | 0         | 0         | 0         | 0         | 0         | 0         | 0         | 0         | 201.705   | 62.2566    | 35.297     | 288.1      | 39s ribosomal protein L47, mitochondrial precursor, putative                    |                          |
| PVX_095460  | 0         | 0         | 0         | 446.13    | 44.2606   | 0         | 213.515   | 0         | 0         | 0          | 83.1522    | 226.002    | hypothetical protein, conserved                                                 |                          |
| PVX_095470  | 33.3946   | 0         | 0         | 0         | 0         | 0         | 0         | 23.1809   | 31.6245   | 11.7355    | 26.5873    | 27.0096    | hypothetical protein, conserved                                                 |                          |
| PVX_095475  | 0         | 0         | 0         | 0         | 0         | 0         | 0         | 0         | 0         | 0          | 0          | 0          | circumsporozoite- and TRAP-related protein, putative (CTRP)                     |                          |
| PVX_095480  | 186.151   | 390.555   | 0         | 0         | 118.487   | 0         | 1143.56   | 0         | 141.191   | 326.808    | 370.596    | 302.558    | translation initiation factor 4E, putative                                      |                          |
| PVX_095485  | 279.336   | 0         | 1392.71   | 0         | 177.597   | 0         | 642.553   | 776.543   | 635.408   | 343.364    | 611.686    | 0          | zinc finger protein, putative                                                   |                          |
| PVX_095490  | 0         | 0         | 0         | 0         | 0         | 0         | 0         | 0         | 20.1745   | 0          | 10.5985    | 0          | hypothetical protein, conserved                                                 |                          |
| PVX_095495  | 0         | 0         | 0         | 0         | 0         | 0         | 0         | 0         | 0         | 0          | 0          | 0          | hypothetical protein, conserved                                                 |                          |
| PVX_095990  | 0         | 0         | 0         | 0         | 0         | 0         | 0         | 0         | 0         | 0          | 45.6351    | 0          | VIR protein, PIR protein                                                        |                          |
| PVX_095995  | 0         | 0         | 0         | 0         | 0         | 0         | 0         | 0         | 0         | 0          | 0          | 0          | variable surface protein Vir16/32-related, PIR protein                          |                          |
| PVX_095997  | 0         | 45.9571   | 0         | 0         | 0         | 0         | 0         | 0         | 24.9392   | 46.2466    | 13.1007    | 0          | VIR protein, pseudogene, PIR protein, pseudogene                                |                          |
| PVX_096000  | 0         | 0         | 0         | 0         | 0         | 0         | 0         | 0         | 0         | 0          | 0          | 0          | variable surface protein Vir4, putative, PIR protein                            |                          |
| PVX_096001  | 0         | 0         | 0         | 0         | 0         | 0         | 0         | 0         | 0         | 0          | 0          | 0          | VIR protein, PIR protein                                                        |                          |
| PVX_096001a | 0         | 0         | 0         | 0         | 31.6581   | 0         | 0         | 0         | 0         | 0          | 0          | 19.8435    | 0                                                                               | VIR protein, PIR protein |
| PVX_096003  | 0         | 0         | 0         | 0         | 0         | 0         | 0         | 0         | 0         | 0          | 0          | 0          | VIR protein, PIR protein                                                        |                          |
| PVX_096004  | 0         | 0         | 0         | 0         | 0         | 0         | 0         | 0         | 0         | 0          | 0          | 0          | VIR protein, PIR protein                                                        |                          |
| PVX_096005  | 0         | 69.4054   | 0         | 0         | 0         | 0         | 0         | 0         | 0         | 0          | 19.7774    | 0          | variable surface protein Vir15-related, PIR protein                             |                          |
| PVX_096007  | 0         | 0         | 0         | 0         | 0         | 0         | 0         | 0         | 0         | 0          | 0          | 0          | VIR protein, pseudogene, PIR protein, pseudogene                                |                          |
| PVX_096010  | 0         | 150.342   | 0         | 0         | 0         | 0         | 164.831   | 0         | 40.7824   | 37.794     | 85.6731    | 0          | Plasmodium exported protein, unknown function                                   |                          |
| PVX_096015  | 199.87    | 0         | 499.101   | 0         | 127.262   | 0         | 0         | 0         | 0         | 0          | 79.5832    | 0          | Plasmodium exported protein, unknown function                                   |                          |
| PVX_096020  | 0         | 440.241   | 0         | 0         | 50.0225   | 0         | 0         | 218.919   | 0         | 110.728    | 47.0544    | 0          | Plasmodium exported protein, unknown function                                   |                          |
| PVX_096030  | 147.01    | 976.218   | 0         | 0         | 93.4832   | 0         | 0         | 204.355   | 0         | 335.585    | 117.063    | 0          | hypothetical protein                                                            |                          |
| PVX_096035  | 0         | 47.1151   | 0         | 0         | 0         | 0         | 0         | 0         | 0         | 23.6767    | 0          | 0          | hypothetical protein                                                            |                          |
| PVX_096040  | 0         | 0         | 0         | 0         | 0         | 0         | 0         | 0         | 0         | 0          | 0          | 0          | hypothetical protein                                                            |                          |
| PVX_096045  | 244.012   | 1537      | 1220.18   | 0         | 0         | 2511.8    | 375.45    | 0         | 185.152   | 171.306    | 388.66     | 0          | hypothetical protein                                                            |                          |
| PVX_096050  | 0         | 233.38    | 0         | 0         | 35.3706   | 570.789   | 0         | 0         | 42.2042   | 156.44     | 22.1645    | 0          | hypothetical protein                                                            |                          |
| PVX_096055  | 0         | 0         | 0         | 0         | 0         | 0         | 0         | 0         | 31.1217   | 144.25     | 49.0409    | 0          | hypothetical protein                                                            |                          |
| PVX_096060  | 239.365   | 0         | 0         | 0         | 0         | 0         | 0         | 0         | 0         | 0          | 47.6494    | 194.16     | hypothetical protein                                                            |                          |
| PVX_096065  | 0         | 0         | 318.715   | 0         | 0         | 0         | 0         | 177.747   | 48.4822   | 89.8376    | 76.3777    | 0          | Plasmodium exported protein, unknown function                                   |                          |
| PVX_096070  | 76.3754   | 426.702   | 0         | 0         | 121.207   | 391.117   | 0         | 530.471   | 231.541   | 536.637    | 182.435    | 123.752    | early transcribed membrane protein (ETAMP)                                      |                          |
| PVX_096071  | 0         | 0         | 0         | 0         | 0         | 0         | 0         | 0         | 0         | 0          | 0          | 0          | conserved Plasmodium protein, unknown function                                  |                          |
| PVX_096075  | 0         | 0         | 0         | 0         | 0         | 188.705   | 0         | 0         | 27.9538   | 12.9636    | 22.03      | 0          | hypothetical protein, conserved                                                 |                          |
| PVX_096080  | 183.104   | 0         | 0         | 0         | 58.2693   | 0         | 0         | 0         | 347.193   | 128.585    | 145.811    | 297.58     | mago nashi domain containing protein                                            |                          |
| PVX_096085  | 0         | 0         | 0         | 0         | 0         | 0         | 0         | 0         | 0         | 23.6591    | 8.93375    | 0          | hypothetical protein, conserved                                                 |                          |
| PVX_096090  | 0         | 0         | 0         | 0         | 0         | 0         | 0         | 0         | 8.2249    | 0          | 25.9299    | 0          | exonuclease I, putative                                                         |                          |
| PVX_096095  | 0         | 0         | 0         | 0         | 0         | 0         | 0         | 0         | 0         | 0          | 0          | 0          | kinesin-19, putative                                                            |                          |
| PVX_096105  | 0         | 0         | 0         | 0         | 0         | 0         | 0         | 0         | 0         | 0          | 0          | 0          | kelch domain-containing protein                                                 |                          |
| PVX_096110  | 0         | 5.91847   | 0         | 0         | 0         | 0         | 0         | 0         | 3.21285   | 8.94281    | 8.44133    | 13.7176    | hypothetical protein, conserved                                                 |                          |
| PVX_096115  | 0         | 10.4435   | 0         | 0         | 0         | 0         | 0         | 0         | 0         | 5.25943    | 20.8518    | 0          | protein kinase, putative                                                        |                          |
| PVX_096120  | 0         | 0         | 0         | 0         | 0         | 0         | 0         | 0         | 0         | 0          | 0          | 0          | hypothetical protein, conserved                                                 |                          |
| PVX_096125  | 0         | 0         | 0         | 0         | 0         | 0         | 0         | 0         | 233.78    | 215.355    | 122.434    | 0          | mitochondrial import inner membrane translocase subunit TIM14, putative (PAM18) |                          |
| PVX_096130  | 73.9763   | 0         | 0         | 236.599   | 0         | 0         | 0         | 0         | 28.0331   | 25.9893    | 14.7253    | 0          | 3-demethylubiquinone-9 3-methyltransferase, putative                            |                          |
| PVX_096135  | 0         | 0         | 0         | 0         | 28        | 0         | 0         | 0         | 100.27    | 123.925    | 35.1106    | 0          | type 2A phosphatase-associated protein 42, putative (TAP42)                     |                          |
| PVX_096140  | 0         | 40.9345   | 0         | 0         | 9.29703   | 0         | 0         | 0         | 44.4371   | 20.6097    | 40.8587    | 0          | hypothetical protein, conserved                                                 |                          |
| PVX_096145  | 0         | 13.472    | 0         | 0         | 6.11881   | 0         | 0         | 0         | 0         | 27.1364    | 19.2123    | 0          | Rab GTPase activator and protein kinase, putative                               |                          |
| PVX_096150  | 45.8852   | 48.0337   | 0         | 0         | 7.27239   | 0         | 0         | 31.8532   | 34.7639   | 8.06224    | 27.399     | 74.2369    | hypothetical protein, conserved                                                 |                          |
| PVX_096155  | 17.3917   | 0         | 0         | 55.5355   | 5.51211   | 0         | 0         | 24.1451   | 0         | 0          | 10.3849    | 28.1334    | hypothetical protein, conserved                                                 |                          |
| PVX_096165  | 38.1838   | 0         | 94.9163   | 0         | 0         | 0         | 0         | 0         | 43.3981   | 40.2513    | 22.8008    | 61.8034    | metallo-hydrolase/oxidoreductase, putative                                      |                          |



| Gene ID    | Patient 1 | Patient 2 | Patient 3 | Patient 4 | Patient 5 | Patient 6 | Patient 7 | Patient 8 | Patient 9 | Patient 10 | Patient 11 | Patient 12 | Gene Description                                                     |
|------------|-----------|-----------|-----------|-----------|-----------|-----------|-----------|-----------|-----------|------------|------------|------------|----------------------------------------------------------------------|
| Patient    |           |           |           |           |           |           |           |           |           |            |            |            |                                                                      |
| PVX_096170 | 653.815   | 0         | 0         | 1053.04   | 0         | 0         | 504.337   | 0         | 0         | 229.407    | 130.188    | 0          | hypothetical protein, conserved                                      |
| PVX_096175 | 0         | 0         | 0         | 0         | 0         | 0         | 0         | 0         | 0         | 0          | 67.3892    | 0          | dynactin subunit 5, putative                                         |
| PVX_096180 | 21.2586   | 29.6714   | 0         | 0         | 0         | 0         | 0         | 29.5146   | 32.2118   | 37.3526    | 29.6192    | 34.3923    | hypothetical protein                                                 |
| PVX_096185 | 0         | 0         | 0         | 0         | 0         | 0         | 0         | 0         | 0         | 0          | 0          | 0          | hypothetical protein, conserved                                      |
| PVX_096195 | 0         | 0         | 0         | 0         | 0         | 0         | 0         | 0         | 0         | 0          | 0          | 0          | hypothetical protein, conserved                                      |
| PVX_096200 | 0         | 0         | 0         | 0         | 0         | 0         | 0         | 0         | 0         | 0          | 17.5553    | 0          | hypothetical protein, conserved                                      |
| PVX_096205 | 0         | 0         | 0         | 0         | 0         | 0         | 0         | 0         | 38.0365   | 0          | 19.977     | 0          | hypothetical protein, conserved                                      |
| PVX_096210 | 0         | 0         | 0         | 0         | 0         | 0         | 188.739   | 0         | 0         | 43.2511    | 0          | 0          | hypothetical protein, conserved                                      |
| PVX_096215 | 0         | 0         | 0         | 0         | 0         | 0         | 0         | 0         | 23.2939   | 0          | 0          | 0          | hypothetical protein, conserved                                      |
| PVX_096220 | 240.085   | 0         | 0         | 0         | 0         | 0         | 0         | 668.084   | 273.25    | 337.105    | 143.401    | 0          | hypothetical protein, conserved                                      |
| PVX_096225 | 0         | 83.5618   | 0         | 0         | 0         | 204.121   | 121.996   | 110.821   | 120.941   | 42.0636    | 79.4256    | 0          | hypothetical protein, conserved                                      |
| PVX_096230 | 0         | 0         | 0         | 0         | 0         | 0         | 210.554   | 0         | 104.112   | 96.4493    | 54.6691    | 0          | hypothetical protein, conserved                                      |
| PVX_096235 | 91.7169   | 0         | 0         | 293.485   | 29.1217   | 0         | 140.435   | 127.424   | 139.04    | 64.4381    | 73.0282    | 148.675    | GTP-binding protein, putative                                        |
| PVX_096240 | 36.1042   | 0         | 89.7416   | 230.698   | 11.4481   | 0         | 0         | 50.133    | 13.678    | 50.746     | 35.9316    | 58.434     | hypothetical protein, conserved                                      |
| PVX_096245 | 0         | 0         | 0         | 0         | 0         | 0         | 74.993    | 0         | 0         | 0          | 19.5242    | 0          | rhoGTPase-associated leucine zipper-like protein 1, putative (RALP1) |
| PVX_096250 | 0         | 0         | 196.788   | 252.941   | 25.0998   | 0         | 121.029   | 0         | 89.8984   | 27.7798    | 94.4415    | 128.136    | PeiOta protein homologue, putative                                   |
| PVX_096252 | 172.183   | 120.395   | 429.627   | 0         | 0         | 0         | 264.321   | 0         | 65.2922   | 120.923    | 171.391    | 279.745    | conserved Plasmodium protein, unknown function                       |
| PVX_096253 | 0         | 0         | 0         | 0         | 0         | 0         | 0         | 0         | 680.992   | 0          | 0          | 0          | conserved Plasmodium protein, unknown function                       |
| PVX_096255 | 0         | 107.169   | 0         | 491.415   | 48.7509   | 0         | 235.2     | 426.241   | 348.758   | 269.189    | 396.751    | 248.943    | hypothetical protein, conserved                                      |
| PVX_096260 | 0         | 0         | 0         | 0         | 0         | 0         | 0         | 0         | 0         | 0          | 0          | 0          | hypothetical protein, conserved                                      |
| PVX_096265 | 1366.82   | 1146.33   | 0         | 875.845   | 477.914   | 0         | 1047.92   | 759.917   | 1139.98   | 912.073    | 1170       | 443.689    | 40S ribosomal protein S5, putative                                   |
| PVX_096268 | 44.7745   | 0         | 0         | 0         | 0         | 0         | 0         | 0         | 0         | 15.7325    | 53.4733    | 144.969    | conserved Plasmodium membrane protein, unknown function              |
| PVX_096271 | 389.307   | 272.292   | 0         | 0         | 0         | 0         | 0         | 270.71    | 73.8245   | 68.3442    | 116.258    | 0          | conserved Plasmodium protein, unknown function                       |
| PVX_096273 | 0         | 0         | 86.3588   | 0         | 33.0497   | 0         | 53.1035   | 0         | 26.3255   | 24.4177    | 27.6627    | 56.2313    | DEAD/DEAH box ATP-dependent RNA helicase, putative                   |
| PVX_096275 | 38.9821   | 0         | 0         | 0         | 0         | 0         | 0         | 54.1308   | 29.5372   | 13.6976    | 31.0367    | 0          | hypothetical protein, conserved                                      |
| PVX_096280 | 100.132   | 0         | 498.678   | 320.487   | 190.801   | 0         | 613.442   | 278.254   | 493.368   | 246.215    | 378.714    | 487.061    | hypothetical protein, conserved                                      |
| PVX_096285 | 22.761    | 0         | 28.2681   | 36.3343   | 7.21279   | 0         | 0         | 31.5975   | 8.62149   | 15.9978    | 33.9772    | 0          | hypothetical protein, conserved                                      |
| PVX_096289 | 0         | 0         | 0         | 0         | 61.5587   | 0         | 0         | 0         | 0         | 0          | 269.51     | 314.391    | hypothetical protein                                                 |
| PVX_096292 | 0         | 0         | 0         | 660.812   | 65.5434   | 0         | 0         | 286.309   | 312.303   | 72.2701    | 40.9817    | 0          | HAM1 domain containing protein                                       |
| PVX_096295 | 0         | 41.795    | 0         | 0         | 0         | 0         | 0         | 41.575    | 17.0157   | 15.7862    | 11.9213    | 0          | hypothetical protein, conserved                                      |
| PVX_096300 | 0         | 0         | 445.117   | 572.129   | 283.765   | 0         | 273.857   | 0         | 67.6374   | 0          | 177.541    | 289.831    | hypothetical protein, conserved                                      |
| PVX_096302 | 0         | 311.161   | 0         | 0         | 142.029   | 0         | 0         | 0         | 336.945   | 777.527    | 264.943    | 0          | conserved Plasmodium protein, unknown function                       |
| PVX_096305 | 153.324   | 0         | 95.2825   | 0         | 24.3096   | 0         | 117.183   | 0         | 101.653   | 26.9376    | 106.814    | 124.084    | ferrodoxin reductase, putative                                       |
| PVX_096307 | 0         | 0         | 0         | 0         | 0         | 0         | 0         | 0         | 0         | 0          | 0          | 0          | conserved Plasmodium protein, unknown function                       |
| PVX_096310 | 0         | 0         | 0         | 0         | 0         | 0         | 0         | 0         | 0         | 0          | 62.3593    | 0          | hypothetical protein, conserved                                      |
| PVX_096315 | 0         | 0         | 0         | 0         | 0         | 0         | 187.96    | 0         | 92.9749   | 129.22     | 73.2374    | 0          | hypothetical protein, conserved                                      |
| PVX_096320 | 294.02    | 0         | 366.555   | 0         | 46.7416   | 0         | 0         | 0         | 111.474   | 51.6285    | 117.063    | 716.032    | exosome complex component CSL4, putative (CSL4)                      |
| PVX_096325 | 33.6916   | 7.83643   | 0         | 0         | 3.55886   | 0         | 0         | 31.1811   | 8.50788   | 19.7338    | 8.9412     | 0          | hypothetical protein, conserved                                      |
| PVX_096330 | 139.316   | 48.6423   | 173.307   | 0         | 0         | 0         | 0         | 0         | 26.3958   | 24.4727    | 55.4624    | 0          | hypothetical protein, conserved                                      |
| PVX_096335 | 980.289   | 1256.5    | 1222.69   | 523.861   | 207.871   | 0         | 0         | 227.15    | 743.411   | 573.733    | 585.46     | 265.38     | 40S ribosomal protein S10, putative                                  |
| PVX_096340 | 1231.9    | 860.607   | 766.949   | 985.796   | 391.256   | 526.128   | 1415.19   | 1854.34   | 1439.66   | 1045.76    | 1287.43    | 1664.63    | 60S ribosomal protein L11, putative                                  |
| PVX_096345 | 0         | 40.0856   | 0         | 0         | 36.4288   | 293.846   | 0         | 79.7389   | 21.7541   | 40.3442    | 57.1405    | 0          | hypothetical protein, conserved                                      |
| PVX_096350 | 48.378    | 0         | 60.1048   | 0         | 15.3354   | 0         | 36.9581   | 0         | 36.6528   | 59.5014    | 48.146     | 0          | hypothetical protein, conserved                                      |
| PVX_096355 | 75.6893   | 0         | 0         | 0         | 24.0009   | 0         | 0         | 0         | 43.0126   | 119.682    | 45.1966    | 0          | actin-related protein, putative (ARP6)                               |
| PVX_096360 | 0         | 0         | 0         | 0         | 0         | 0         | 0         | 0         | 0         | 0          | 48.8249    | 0          | serine/threonine-protein kinase NEK4, putative                       |
| PVX_096365 | 0         | 0         | 0         | 0         | 86.2896   | 0         | 0         | 753.144   | 0         | 0          | 161.617    | 0          | hypothetical protein                                                 |
| PVX_096370 | 0         | 83.9658   | 0         | 384.823   | 152.724   | 0         | 368.321   | 500.982   | 0         | 253.238    | 239.207    | 194.945    | hypothetical protein, conserved                                      |
| PVX_096380 | 0         | 0         | 1055.47   | 0         | 0         | 0         | 0         | 228.823   | 62.4071   | 0          | 131.06     | 267.341    | conserved Plasmodium protein, unknown function                       |
| PVX_096385 | 0         | 0         | 0         | 0         | 0         | 0         | 0         | 0         | 0         | 0          | 28.7927    | 0          | hypothetical protein, conserved                                      |
| PVX_096390 | 0         | 0         | 0         | 0         | 0         | 0         | 0         | 0         | 0         | 0          | 0          | 0          | hypothetical protein, conserved                                      |
| PVX_096395 | 0         | 0         | 0         | 0         | 0         | 0         | 0         | 0         | 0         | 0          | 13.2353    | 0          | hypothetical protein, conserved                                      |
| PVX_096400 | 0         | 0         | 154.832   | 0         | 0         | 0         | 0         | 0         | 0         | 87.4769    | 37.1699    | 0          | prefoldin subunit 3, putative                                        |
| PVX_096405 | 0         | 0         | 0         | 0         | 74.1097   | 0         | 0         | 0         | 176.476   | 0          | 92.6181    | 0          | 30S ribosomal protein S8, putative                                   |
| PVX_096410 | 0         | 0         | 0         | 0         | 0         | 0         | 0         | 0         | 0         | 0          | 0          | 0          | cysteine repeat modular protein 2, putative (CRMP2)                  |
| PVX_096910 | 0         | 0         | 0         | 0         | 0         | 0         | 0         | 0         | 0         | 0          | 0          | 0          | variable surface protein Vir23-related,PIR protein                   |
| PVX_096920 | 0         | 0         | 0         | 0         | 0         | 0         | 0         | 0         | 24.14     | 0          | 0          | 0          | variable surface protein Vir12-related,PIR protein                   |
| PVX_096925 | 0         | 0         | 0         | 0         | 0         | 0         | 0         | 0         | 0         | 0          | 0          | 0          | variable surface protein Vir15-like,PIR protein                      |
| PVX_096930 | 0         | 95.9682   | 0         | 0         | 0         | 0         | 0         | 0         | 0         | 0          | 0          | 0          | variable surface protein Vir1-related,PIR protein                    |
| PVX_096935 | 0         | 0         | 0         | 0         | 0         | 0         | 0         | 0         | 0         | 0          | 0          | 0          | variable surface protein Vir9-related,PIR protein                    |
| PVX_096937 | 0         | 0         | 0         | 0         | 0         | 0         | 0         | 0         | 0         | 0          | 28.6077    | 0          | VIR protein, pseudogene,PIR protein, pseudogene                      |
| PVX_096938 | 0         | 0         | 0         | 0         | 0         | 0         | 0         | 0         | 0         | 0          | 0          | 0          | VIR protein, pseudogene,PIR protein, pseudogene                      |
| PVX_096940 | 0         | 0         | 0         | 0         | 0         | 0         | 0         | 0         | 0         | 0          | 0          | 0          | variable surface protein Vir24-related,PIR protein                   |

| Gene ID    | Patient | Patient 1 | Patient 2 | Patient 3 | Patient 4 | Patient 5 | Patient 6 | Patient 7 | Patient 8 | Patient 9 | Patient 10 | Patient 11 | Patient 12 | Gene Description                                                   |
|------------|---------|-----------|-----------|-----------|-----------|-----------|-----------|-----------|-----------|-----------|------------|------------|------------|--------------------------------------------------------------------|
| PVX_096945 |         | 0         | 0         | 0         | 0         | 0         | 437.524   | 0         | 0         | 0         | 0          | 0          | 0          | variable surface protein Vir4-related,PIR protein                  |
| PVX_096950 |         | 0         | 399.407   | 0         | 0         | 68.0682   | 366.067   | 109.4     | 99.309    | 135.46    | 226.059    | 56.9247    | 115.827    | tryptophan-rich antigen (Pv-fam-a)                                 |
| PVX_096955 |         | 160.502   | 373.518   | 0         | 342.025   | 84.8571   | 547.575   | 0         | 74.3017   | 405.42    | 319.561    | 181.037    | 173.264    | Plasmodium exported protein, unknown function                      |
| PVX_096960 |         | 0         | 0         | 0         | 0         | 0         | 0         | 0         | 0         | 0         | 0          | 0          | 0          | PST-A protein                                                      |
| PVX_096965 |         | 0         | 0         | 0         | 0         | 0         | 0         | 0         | 0         | 0         | 0          | 0          | 0          | VIR protein,PIR protein                                            |
| PVX_096970 |         | 0         | 196.405   | 0         | 0         | 22.3144   | 0         | 0         | 0         | 0         | 49.4067    | 139.963    | 0          | variable surface protein Vir8-related,PIR protein                  |
| PVX_096975 |         | 182.919   | 298.01    | 303.324   | 584.816   | 58.036    | 0         | 186.538   | 169.371   | 231.034   | 107.112    | 254.871    | 98.7527    | VIR protein,PIR protein                                            |
| PVX_096980 |         | 181.205   | 442.996   | 0         | 289.91    | 86.3013   | 0         | 0         | 0         | 34.3375   | 190.967    | 144.282    | 0          | variable surface protein Vir, putative,PIR protein                 |
| PVX_096985 |         | 0         | 0         | 0         | 298.079   | 0         | 0         | 0         | 0         | 35.3031   | 0          | 18.5421    | 0          | variable surface protein Vir, putative,PIR protein                 |
| PVX_096987 |         | 152.004   | 425.03    | 758.121   | 0         | 145.006   | 0         | 0         | 0         | 345.793   | 53.381     | 90.7803    | 246.82     | VIR protein,PIR protein                                            |
| PVX_096990 |         | 0         | 0         | 0         | 0         | 0         | 0         | 0         | 0         | 0         | 35.9414    | 10.1805    | 0          | Pv-fam-d protein                                                   |
| PVX_096992 |         | 0         | 0         | 0         | 375.711   | 0         | 0         | 179.798   | 163.049   | 0         | 82.4219    | 70.0683    | 0          | Plasmodium exported protein, unknown function                      |
| PVX_096995 |         | 216.559   | 403.276   | 0         | 0         | 91.6376   | 369.618   | 110.461   | 200.542   | 109.418   | 101.443    | 172.427    | 116.951    | tryptophan-rich antigen (Pv-fam-a)                                 |
| PVX_097000 |         | 0         | 26.551    | 0         | 0         | 0         | 0         | 58.1429   | 0         | 0         | 26.7316    | 7.57119    | 0          | Plasmodium exported protein, unknown function                      |
| PVX_097002 |         | 0         | 0         | 0         | 0         | 0         | 0         | 0         | 0         | 0         | 0          | 0          | 0          | Plasmodium exported protein, unknown function                      |
| PVX_097005 |         | 0         | 0         | 0         | 0         | 0         | 0         | 0         | 0         | 0         | 111.295    | 63.0926    | 0          | Plasmodium exported protein, unknown function                      |
| PVX_097010 |         | 0         | 0         | 0         | 0         | 0         | 0         | 0         | 0         | 99.3601   | 91.9106    | 52.1377    | 0          | hypothetical protein                                               |
| PVX_097015 |         | 0         | 21.2185   | 0         | 0         | 0         | 0         | 46.4586   | 0         | 46.0678   | 21.3657    | 18.1533    | 0          | Plasmodium exported protein, unknown function                      |
| PVX_097025 |         | 35.9573   | 12.5462   | 0         | 0         | 11.3965   | 0         | 0         | 0         | 6.81033   | 25.2721    | 10.7354    | 0          | ABC transporter, putative                                          |
| PVX_097525 |         | 0         | 0         | 0         | 0         | 0         | 0         | 0         | 0         | 0         | 0          | 0          | 0          | variable surface protein Vir 12, putative,PIR protein              |
| PVX_097530 |         | 0         | 0         | 0         | 0         | 0         | 0         | 0         | 0         | 0         | 0          | 0          | 0          | variable surface protein Vir22/12-related,PIR protein              |
| PVX_097540 |         | 0         | 0         | 0         | 154.71    | 0         | 0         | 0         | 0         | 18.3406   | 17.0086    | 9.63535    | 0          | variable surface protein Vir24-related,PIR protein                 |
| PVX_097542 |         | 0         | 0         | 0         | 0         | 0         | 0         | 0         | 0         | 0         | 0          | 0          | 0          | VIR protein,PIR protein                                            |
| PVX_097545 |         | 0         | 46.6786   | 0         | 0         | 0         | 0         | 0         | 0         | 25.3306   | 0          | 0          | 0          | variable surface protein Vir12-related,PIR protein                 |
| PVX_097550 |         | 0         | 0         | 0         | 0         | 0         | 0         | 0         | 0         | 42.5791   | 19.7416    | 11.1841    | 0          | VIR protein, pseudogene,PIR protein, pseudogene                    |
| PVX_097555 |         | 0         | 0         | 0         | 0         | 0         | 0         | 0         | 0         | 0         | 0          | 0          | 0          | variable surface protein Vir12/16-related,PIR protein              |
| PVX_097557 |         | 97.6628   | 327.14    | 194.113   | 124.751   | 37.1457   | 99.8557   | 0         | 27.1178   | 73.9903   | 109.825    | 62.2041    | 0          | Plasmodium exported protein, unknown function                      |
| PVX_097560 |         | 0         | 33.3674   | 237.863   | 0         | 0         | 0         | 0         | 0         | 0         | 33.5598    | 19.0172    | 0          | lysophospholipase, putative                                        |
| PVX_097565 |         | 80.7879   | 338.535   | 0         | 0         | 25.6447   | 0         | 0         | 0         | 153.079   | 141.907    | 112.569    | 130.918    | Plasmodium exported protein, unknown function                      |
| PVX_097567 |         | 0         | 101.096   | 0         | 0         | 0         | 0         | 0         | 201.048   | 54.8352   | 152.384    | 115.171    | 0          | Plasmodium exported protein, unknown function                      |
| PVX_097570 |         | 0         | 0         | 0         | 0         | 0         | 0         | 0         | 0         | 50.6153   | 9.5578     | 0          | 0          | Phist protein (Pf-fam-b)                                           |
| PVX_097575 |         | 20.881    | 116.561   | 0         | 33.3323   | 0         | 53.3601   | 0         | 0         | 15.8187   | 55.0368    | 8.3122     | 16.8856    | tryptophan-rich antigen (Pv-fam-a)                                 |
| PVX_097577 |         | 0         | 0         | 0         | 0         | 38.1809   | 0         | 0         | 0         | 0         | 42.2063    | 95.6827    | 0          | tryptophan-rich antigen (Pv-fam-a)                                 |
| PVX_097580 |         | 102.424   | 71.5529   | 0         | 0         | 0         | 0         | 0         | 0         | 0         | 0          | 0          | 0          | hypothetical protein                                               |
| PVX_097583 |         | 1762.52   | 5422.85   | 0         | 2261.34   | 224.318   | 2715.89   | 541.206   | 1960.6    | 1938.28   | 2413.67    | 1017.57    | 0          | skeleton-binding protein 1, putative (SBP1)                        |
| PVX_097585 |         | 0         | 0         | 0         | 0         | 0         | 0         | 0         | 201.048   | 0         | 50.7948    | 0          | 0          | Plasmodium exported protein, unknown function                      |
| PVX_097590 |         | 0         | 0         | 0         | 0         | 0         | 0         | 0         | 0         | 0         | 0          | 0          | 0          | rhostry-associated protein 2, putative                             |
| PVX_097592 |         | 0         | 0         | 0         | 0         | 0         | 0         | 0         | 0         | 0         | 0          | 0          | 0          | hypothetical protein                                               |
| PVX_097595 |         | 0         | 0         | 0         | 0         | 0         | 0         | 0         | 47.2175   | 0         | 0          | 0          | 0          | hypothetical protein, conserved                                    |
| PVX_097600 |         | 0         | 0         | 0         | 446.564   | 0         | 0         | 106.834   | 96.983    | 105.831   | 73.5898    | 180.675    | 0          | hypothetical protein, conserved                                    |
| PVX_097605 |         | 0         | 38.7257   | 68.9436   | 88.6165   | 0         | 0         | 0         | 0         | 0         | 19.4981    | 5.5221     | 0          | vacuolar protein sorting-associated protein 11, putative (VPS11)   |
| PVX_097610 |         | 93.919    | 32.7824   | 0         | 150.077   | 0         | 0         | 0         | 0         | 106.751   | 66.0001    | 130.86     | 0          | hypothetical protein, conserved                                    |
| PVX_097615 |         | 0         | 56.1183   | 0         | 0         | 0         | 0         | 0         | 0         | 0         | 28.2286    | 15.9947    | 0          | hypothetical protein, conserved                                    |
| PVX_097620 |         | 0         | 0         | 0         | 0         | 0         | 0         | 0         | 0         | 0         | 0          | 0          | 0          | hypothetical protein, conserved                                    |
| PVX_097625 |         | 438.49    | 459.21    | 545.249   | 175.208   | 69.551    | 280.506   | 83.827    | 304.492   | 124.607   | 365.904    | 185.472    | 88.7577    | merozoite surface protein 8, putative                              |
| PVX_097630 |         | 0         | 0         | 0         | 0         | 0         | 0         | 0         | 0         | 0         | 0          | 0          | 0          | hypothetical protein, conserved                                    |
| PVX_097635 |         | 0         | 0         | 0         | 0         | 0         | 0         | 0         | 0         | 0         | 0          | 0          | 0          | hypothetical protein, conserved                                    |
| PVX_097640 |         | 0         | 0         | 0         | 0         | 32.6422   | 0         | 0         | 142.805   | 77.909    | 36.1022    | 40.9177    | 0          | hypothetical protein, conserved                                    |
| PVX_097645 |         | 236.206   | 0         | 294.239   | 0         | 0         | 0         | 180.989   | 164.126   | 134.305   | 0          | 141.061    | 0          | hypothetical protein, conserved                                    |
| PVX_097650 |         | 0         | 0         | 0         | 0         | 0         | 0         | 0         | 0         | 0         | 0          | 0          | 0          | hypothetical protein, conserved                                    |
| PVX_097655 |         | 0         | 0         | 0         | 0         | 49.6038   | 0         | 0         | 0         | 0         | 0          | 62.1027    | 0          | 50S ribosomal protein L28, apicoplast, putative                    |
| PVX_097660 |         | 109.355   | 0         | 0         | 0         | 34.6904   | 0         | 83.6218   | 75.9369   | 20.717    | 38.4221    | 87.0676    | 88.5405    | 4-diphosphocytidyl-2-C-methyl-D-erythritol kinase, putative (IspE) |
| PVX_097665 |         | 37.2772   | 0         | 0         | 0         | 0         | 0         | 0         | 51.7624   | 0         | 13.0986    | 14.8396    | 0          | hypothetical protein, conserved                                    |
| PVX_097670 |         | 0         | 26.7558   | 0         | 0         | 0         | 0         | 0         | 0         | 0         | 0          | 0          | 0          | merozoite surface protein 3 (MSP3.1)                               |
| PVX_097675 |         | 35.7151   | 24.9291   | 0         | 0         | 0         | 0         | 0         | 0         | 13.5306   | 0          | 0          | 0          | merozoite surface protein 3 (MSP3.2)                               |
| PVX_097680 |         | 0         | 0         | 0         | 0         | 0         | 0         | 0         | 0         | 0         | 0          | 0          | 0          | merozoite surface protein 3 (MSP3.3)                               |
| PVX_097685 |         | 0         | 0         | 0         | 0         | 0         | 0         | 0         | 0         | 0         | 16.233     | 0          | 0          | merozoite surface protein 3 (MSP3.4)                               |
| PVX_097690 |         | 0         | 0         | 0         | 0         | 17.8563   | 0         | 0         | 0         | 5.33435   | 0          | 0          | 0          | merozoite surface protein 3 (MSP3.5)                               |
| PVX_097695 |         | 0         | 0         | 0         | 0         | 0         | 0         | 0         | 0         | 0         | 0          | 3.56725    | 0          | merozoite surface protein 3 (MSP3.6)                               |
| PVX_097700 |         | 0         | 0         | 0         | 0         | 0         | 0         | 0         | 0         | 0         | 0          | 0          | 0          | merozoite surface protein 3 (MSP3.7)                               |
| PVX_097705 |         | 0         | 0         | 0         | 0         | 0         | 0         | 0         | 0         | 0         | 0          | 3.53329    | 0          | merozoite surface protein 3 (MSP3.8)                               |
| PVX_097710 |         | 0         | 0         | 0         | 0         | 0         | 0         | 38.7505   | 0         | 0         | 0          | 0          | 0          | merozoite surface protein 3 (MSP3.9)                               |

| Gene ID    | Patient 1 | Patient 2 | Patient 3 | Patient 4 | Patient 5 | Patient 6 | Patient 7 | Patient 8 | Patient 9 | Patient 10 | Patient 11 | Patient 12 | Gene Description                                                              |
|------------|-----------|-----------|-----------|-----------|-----------|-----------|-----------|-----------|-----------|------------|------------|------------|-------------------------------------------------------------------------------|
| Patient    |           |           |           |           |           |           |           |           |           |            |            |            |                                                                               |
| PVX_097715 | 0         | 217.438   | 0         | 0         | 0         | 398.619   | 0         | 0         | 0         | 0          | 15.4938    | 0          | hypothetical protein                                                          |
| PVX_097720 | 0         | 0         | 0         | 0         | 9.10592   | 0         | 0         | 0         | 0         | 0          | 0          | 0          | merozoite surface protein 3 (MSP3.10)                                         |
| PVX_097725 | 0         | 0         | 0         | 0         | 0         | 0         | 0         | 0         | 0         | 0          | 18.8362    | 0          | merozoite surface protein 3 (MSP3.11)                                         |
| PVX_097730 | 0         | 54.5017   | 0         | 0         | 0         | 399.664   | 0         | 0         | 0         | 54.8331    | 31.0687    | 0          | hypothetical protein                                                          |
| PVX_097735 | 128.443   | 179.52    | 0         | 0         | 0         | 0         | 0         | 178.513   | 97.3823   | 90.2242    | 102.275    | 0          | hypothetical protein                                                          |
| PVX_097740 | 97.2355   | 203.644   | 362.665   | 310.767   | 77.1033   | 497.527   | 74.3402   | 202.552   | 368.406   | 273.32     | 203.222    | 157.429    | serine/arginine-rich splicing factor 12, putative (SRSF12)                    |
| PVX_097745 | 0         | 0         | 0         | 0         | 172.94    | 0         | 0         | 0         | 0         | 188.819    | 107.297    | 0          | actin-depolymerizing factor 1, putative (ADF1)                                |
| PVX_097750 | 0         | 28.7121   | 0         | 0         | 0         | 0         | 0         | 0         | 0         | 0          | 0          | 0          | protein kinase, putative                                                      |
| PVX_097755 | 0         | 0         | 0         | 0         | 0         | 0         | 0         | 0         | 0         | 0          | 0          | 8.09782    | myosin B, putative                                                            |
| PVX_097760 | 373.078   | 782.741   | 1396.91   | 1795.51   | 118.735   | 0         | 859.472   | 778.213   | 707.43    | 851.47     | 557.052    | 0          | 60S ribosomal protein L31, putative (RPL31)                                   |
| PVX_097765 | 0         | 42.5728   | 0         | 0         | 19.3453   | 0         | 0         | 169.371   | 69.3102   | 64.2671    | 60.6835    | 0          | hypothetical protein, conserved                                               |
| PVX_097770 | 32.2979   | 11.2691   | 80.2356   | 0         | 15.3542   | 0         | 74.0023   | 44.8389   | 18.3515   | 56.7508    | 19.2856    | 0          | P-type ATPase, putative                                                       |
| PVX_097772 | 0         | 0         | 0         | 0         | 0         | 0         | 0         | 0         | 0         | 133.722    | 0          | 0          | AN1-like zinc finger family protein                                           |
| PVX_097775 | 41.5909   | 0         | 0         | 0         | 13.1896   | 0         | 0         | 0         | 15.7572   | 29.2281    | 24.8354    | 0          | ATP-dependent helicase, putative                                              |
| PVX_097780 | 0         | 0         | 0         | 0         | 0         | 0         | 0         | 0         | 0         | 0          | 0          | 0          | hypothetical protein, conserved                                               |
| PVX_097785 | 0         | 31.8786   | 0         | 0         | 0         | 0         | 0         | 63.4156   | 34.6029   | 0          | 9.08958    | 0          | ATP-dependent helicase, putative                                              |
| PVX_097787 | 0         | 0         | 0         | 0         | 0         | 0         | 0         | 0         | 0         | 0          | 0          | 0          | conserved Plasmodium protein, unknown function                                |
| PVX_097790 | 0         | 0         | 0         | 0         | 0         | 0         | 0         | 0         | 0         | 0          | 109.058    | 0          | 2-oxoisovalerate dehydrogenase subunit beta, mitochondrial, putative (BCKDHB) |
| PVX_097795 | 18.9735   | 0         | 47.1385   | 0         | 12.0274   | 0         | 0         | 0         | 28.7489   | 26.6704    | 45.3178    | 0          | hypothetical protein                                                          |
| PVX_097800 | 6.51157   | 4.54336   | 0         | 0         | 4.12644   | 0         | 9.94335   | 18.0782   | 7.39918   | 6.86525    | 10.3683    | 0          | hypothetical protein, conserved                                               |
| PVX_097805 | 0         | 0         | 0         | 0         | 0         | 0         | 0         | 0         | 0         | 0          | 18.7372    | 0          | hypothetical protein, conserved                                               |
| PVX_097810 | 0         | 0         | 0         | 0         | 0         | 0         | 0         | 17.7187   | 9.66918   | 4.48539    | 10.1616    | 0          | hypothetical protein, conserved                                               |
| PVX_097815 | 24.5397   | 8.56176   | 0         | 0         | 7.77663   | 0         | 0         | 0         | 4.64765   | 17.2479    | 14.653     | 0          | trafficking protein particle complex subunit 8, putative (TRS85)              |
| PVX_097820 | 0         | 0         | 0         | 0         | 0         | 0         | 0         | 0         | 0         | 0          | 0          | 0          | actin-related protein, putative                                               |
| PVX_097825 | 0         | 0         | 0         | 0         | 0         | 0         | 0         | 86.4537   | 23.5857   | 87.4769    | 12.39      | 0          | hypothetical protein, conserved                                               |
| PVX_097830 | 82.2642   | 28.7121   | 0         | 262.863   | 52.1758   | 0         | 0         | 114.235   | 62.3334   | 28.9058    | 122.807    | 66.581     | hypothetical protein, conserved                                               |
| PVX_097835 | 24.4067   | 17.0333   | 0         | 77.9513   | 7.73677   | 0         | 0         | 67.7729   | 36.9827   | 0          | 63.1531    | 0          | DNA mismatch repair protein MSH6, putative (MSH6)                             |
| PVX_097840 | 0         | 0         | 0         | 0         | 0         | 0         | 0         | 0         | 87.2751   | 26.9699    | 45.8434    | 0          | hypothetical protein, conserved                                               |
| PVX_097845 | 0         | 43.1912   | 153.867   | 0         | 19.6266   | 0         | 0         | 0         | 0         | 0          | 24.6257    | 0          | hypothetical protein, conserved                                               |
| PVX_097850 | 87.4166   | 0         | 0         | 0         | 0         | 0         | 0         | 33.1293   | 122.836   | 69.6038    | 0          | 0          | small ubiquitin-related modifier, putative (SUMO)                             |
| PVX_097852 | 0         | 0         | 0         | 0         | 161.289   | 0         | 1560.34   | 0         | 0         | 0          | 200.303    | 0          | conserved Plasmodium protein, unknown function                                |
| PVX_097855 | 0         | 0         | 0         | 0         | 0         | 874.145   | 0         | 0         | 0         | 59.772     | 67.7738    | 0          | hypothetical protein, conserved                                               |
| PVX_097860 | 96.1512   | 134.331   | 239.4     | 307.713   | 61.0659   | 0         | 147.245   | 400.773   | 145.767   | 202.656    | 229.678    | 0          | 60S ribosomal subunit protein L24, putative                                   |
| PVX_097865 | 325.574   | 0         | 0         | 521.947   | 51.778    | 0         | 0         | 0         | 123.451   | 114.33     | 226.851    | 264.41     | TATA-box binding protein, putative (TBP)                                      |
| PVX_097870 | 0         | 0         | 0         | 0         | 35.7272   | 0         | 0         | 0         | 0         | 0          | 22.3874    | 0          | hypothetical protein, conserved                                               |
| PVX_097875 | 0         | 0         | 0         | 0         | 0         | 0         | 0         | 0         | 0         | 0          | 0          | 0          | hypothetical protein, conserved                                               |
| PVX_097885 | 0         | 11.8763   | 0         | 27.1688   | 0         | 0         | 0         | 11.8141   | 3.22354   | 8.97257    | 8.46943    | 0          | hypothetical protein, conserved                                               |
| PVX_097890 | 0         | 0         | 0         | 0         | 0         | 0         | 0         | 0         | 0         | 0          | 0          | 0          | histone deacetylase, putative                                                 |
| PVX_097895 | 0         | 0         | 0         | 0         | 13.8873   | 0         | 0         | 0         | 16.5901   | 15.3861    | 0          | 0          | TBC domain containing protein                                                 |
| PVX_097900 | 34.4768   | 24.0644   | 0         | 0         | 10.9316   | 0         | 0         | 95.7452   | 39.184    | 36.3443    | 0          | 55.7976    | transcription factor 25, putative (TCF25)                                     |
| PVX_097905 | 56.686    | 0         | 0         | 0         | 0         | 0         | 0         | 78.7282   | 42.9568   | 39.8332    | 45.1333    | 0          | rhomboid protease ROM4, putative (ROM4)                                       |
| PVX_097910 | 0         | 0         | 0         | 0         | 82.5222   | 0         | 0         | 0         | 0         | 0          | 0          | 0          | hypothetical protein, conserved                                               |
| PVX_097915 | 854.348   | 596.563   | 163.489   | 210.141   | 187.683   | 0         | 201.088   | 638.973   | 896.494   | 392.519    | 523.26     | 212.908    | 60S ribosomal protein L4, putative (RPL4)                                     |
| PVX_097920 | 0         | 0         | 0         | 0         | 0         | 0         | 0         | 0         | 0         | 0          | 0          | 0          | subtilisin-like serine protease, putative                                     |
| PVX_097925 | 0         | 0         | 0         | 0         | 0         | 0         | 0         | 0         | 0         | 0          | 0          | 0          | hypothetical protein, conserved                                               |
| PVX_097930 | 0         | 0         | 0         | 0         | 0         | 0         | 0         | 0         | 0         | 0          | 51.582     | 0          | hypothetical protein, conserved                                               |
| PVX_097935 | 0         | 0         | 0         | 0         | 0         | 0         | 0         | 0         | 0         | 0          | 0          | 0          | subtilisin-like protease 1 (SUB1)                                             |
| PVX_097940 | 0         | 0         | 0         | 0         | 25.1172   | 0         | 0         | 0         | 15.0039   | 0          | 31.5312    | 0          | cell differentiation protein rcd1, putative                                   |
| PVX_097945 | 64.2563   | 44.8672   | 319.688   | 205.455   | 101.944   | 0         | 196.603   | 89.2488   | 194.785   | 270.907    | 217.435    | 104.08     | hypothetical protein, conserved                                               |
| PVX_097950 | 52.1865   | 54.6323   | 64.8399   | 0         | 16.5435   | 0         | 0         | 36.2286   | 29.6541   | 36.6771    | 31.1618    | 0          | hypothetical protein, conserved                                               |
| PVX_097955 | 183.104   | 128.049   | 0         | 0         | 116.539   | 0         | 0         | 254.619   | 138.877   | 128.585    | 145.811    | 0          | hypothetical protein, conserved                                               |
| PVX_097960 | 206.979   | 0         | 0         | 0         | 32.8692   | 0         | 0         | 143.797   | 0         | 0          | 103.004    | 167.814    | 6-cysteine protein                                                            |
| PVX_097965 | 0         | 0         | 0         | 0         | 0         | 0         | 0         | 0         | 0         | 0          | 0          | 0          | hypothetical protein, conserved                                               |
| PVX_097970 | 0         | 0         | 0         | 0         | 0         | 0         | 157.971   | 0         | 0         | 108.681    | 102.648    | 0          | hypothetical protein, conserved                                               |
| PVX_097975 | 0         | 0         | 0         | 0         | 0         | 0         | 0         | 448.525   | 40.7824   | 37.794     | 85.6731    | 174.492    | triase/hexose phosphate translocator, putative                                |
| PVX_097980 | 0         | 0         | 0         | 0         | 0         | 0         | 0         | 0         | 0         | 0          | 0          | 0          | transcription factor IIb, putative                                            |
| PVX_097985 | 0         | 0         | 0         | 0         | 0         | 0         | 0         | 0         | 0         | 0          | 0          | 0          | guanidine nucleotide exchange factor, putative                                |
| PVX_097990 | 0         | 0         | 365.952   | 0         | 46.6647   | 0         | 0         | 0         | 0         | 0          | 116.871    | 238.284    | hypothetical protein, conserved                                               |
| PVX_097995 | 0         | 14.9208   | 0         | 68.2802   | 0         | 109.309   | 0         | 0         | 0         | 15.0267    | 8.51115    | 0          | ATP-dependent RNA helicase, putative                                          |
| PVX_098000 | 0         | 0         | 0         | 0         | 44.4689   | 0         | 0         | 0         | 0         | 49.1286    | 83.5422    | 0          | single-strand binding protein, putative                                       |
| PVX_098005 | 0         | 0         | 0         | 0         | 0         | 0         | 0         | 0         | 0         | 0          | 0          | 0          | hypothetical protein                                                          |
| PVX_098010 | 0         | 0         | 0         | 0         | 10.4677   | 0         | 0         | 15.2855   | 4.17072   | 7.73909    | 8.76628    | 0          | hypothetical protein                                                          |

| Gene ID    | Patient 1 | Patient 2 | Patient 3 | Patient 4 | Patient 5 | Patient 6 | Patient 7 | Patient 8 | Patient 9 | Patient 10 | Patient 11 | Patient 12 | Gene Description                                                 |
|------------|-----------|-----------|-----------|-----------|-----------|-----------|-----------|-----------|-----------|------------|------------|------------|------------------------------------------------------------------|
| Patient    |           |           |           |           |           |           |           |           |           |            |            |            |                                                                  |
| PVX_098015 | 0         | 76.7417   | 0         | 0         | 0         | 0         | 0         | 0         | 166.536   | 38.5822    | 109.326    | 0          | soluble NSF attachment protein (SNAP), putative                  |
| PVX_098020 | 0         | 29.9921   | 0         | 0         | 0         | 0         | 0         | 0         | 0         | 0          | 12.8311    | 0          | chromosome condensation protein, putative                        |
| PVX_098022 | 0         | 0         | 0         | 326.719   | 0         | 0         | 0         | 0         | 0         | 0          | 0          | 0          | conserved Plasmodium protein, unknown function                   |
| PVX_098023 | 0         | 0         | 0         | 0         | 125.136   | 0         | 0         | 0         | 0         | 0          | 467.429    | 0          | conserved Plasmodium protein, unknown function                   |
| PVX_098025 | 22.7004   | 47.5195   | 28.1928   | 0         | 21.5807   | 0         | 34.6694   | 15.7567   | 38.6934   | 27.9216    | 40.664     | 55.0719    | DNA-directed RNA polymerase I 190 kDa polypeptide, putative      |
| PVX_098030 | 0         | 0         | 0         | 0         | 0         | 0         | 0         | 0         | 0         | 0          | 0          | 0          | hypothetical protein                                             |
| PVX_098035 | 80.5697   | 0         | 0         | 0         | 25.5753   | 0         | 0         | 0         | 0         | 0          | 16.0379    | 130.564    | hypothetical protein, conserved                                  |
| PVX_098040 | 129.279   | 0         | 0         | 137.704   | 13.6664   | 0         | 263.523   | 179.524   | 48.9793   | 151.417    | 94.3521    | 0          | asparagine--tRNA ligase, putative                                |
| PVX_098045 | 0         | 0         | 0         | 0         | 0         | 0         | 0         | 0         | 65.8083   | 0          | 0          | 0          | hypothetical protein, conserved                                  |
| PVX_098050 | 0         | 28.552    | 0         | 0         | 19.4521   | 0         | 0         | 56.8025   | 61.9934   | 43.1328    | 48.8606    | 33.0944    | phosphatidylinositol 4-kinase, putative (PI4K)                   |
| PVX_098055 | 88.4534   | 0         | 0         | 0         | 28.0832   | 0         | 0         | 0         | 67.0449   | 62.1463    | 70.4294    | 143.371    | hypothetical protein, conserved                                  |
| PVX_098060 | 0         | 0         | 0         | 0         | 0         | 0         | 0         | 0         | 0         | 0          | 24.5728    | 0          | hypothetical protein, conserved                                  |
| PVX_098065 | 0         | 0         | 30.4029   | 39.0783   | 0         | 0         | 18.6937   | 0         | 0         | 4.30137    | 14.6169    | 19.7964    | hypothetical protein, conserved                                  |
| PVX_098070 | 0         | 31.0695   | 110.655   | 0         | 14.1155   | 0         | 0         | 123.613   | 16.8625   | 46.9158    | 79.7312    | 0          | cyclophilin, putative                                            |
| PVX_098075 | 0         | 0         | 0         | 0         | 0         | 0         | 0         | 129.551   | 0         | 0          | 18.5614    | 0          | stripes inner membrane complex protein, putative (SIP)           |
| PVX_098080 | 0         | 0         | 0         | 0         | 20.7925   | 0         | 0         | 0         | 49.6593   | 92.087     | 65.2159    | 0          | hypothetical protein, conserved                                  |
| PVX_098085 | 0         | 0         | 0         | 0         | 0         | 0         | 0         | 0         | 39.0936   | 48.3474    | 27.3863    | 0          | topoisomerase I, putative                                        |
| PVX_098582 | 0         | 0         | 0         | 0         | 0         | 0         | 0         | 0         | 0         | 0          | 0          | 0          | reticulocyte binding protein 1b (RBP1b)                          |
| PVX_098585 | 0         | 0         | 0         | 0         | 0         | 0         | 0         | 0         | 0         | 0          | 2.14615    | 0          | reticulocyte binding protein 1a (RBP1a)                          |
| PVX_098590 | 0         | 0         | 0         | 0         | 0         | 0         | 0         | 0         | 0         | 0          | 0          | 0          | hypothetical protein, conserved                                  |
| PVX_098595 | 0         | 0         | 282.278   | 0         | 0         | 0         | 173.629   | 0         | 171.812   | 0          | 135.345    | 183.802    | hypothetical protein, conserved                                  |
| PVX_098600 | 0         | 0         | 0         | 0         | 141.559   | 0         | 0         | 0         | 84.2884   | 0          | 44.2388    | 0          | RER1 protein, putative                                           |
| PVX_098605 | 0         | 129.726   | 0         | 0         | 0         | 0         | 0         | 129.013   | 70.3862   | 97.8601    | 147.875    | 0          | ras-related protein RAB7, putative (RAB7)                        |
| PVX_098610 | 0         | 0         | 0         | 0         | 0         | 0         | 0         | 12.8518   | 0         | 0          | 1.84266    | 0          | hypothetical protein, conserved                                  |
| PVX_098615 | 50.1521   | 17.4978   | 0         | 20.0156   | 11.92     | 0         | 38.2992   | 17.4059   | 9.49848   | 41.859     | 43.672     | 20.2792    | DEAD/DEAH box helicase, putative                                 |
| PVX_098620 | 0         | 58.1003   | 0         | 66.4688   | 13.1944   | 0         | 31.7974   | 0         | 23.6531   | 7.31418    | 33.1419    | 0          | hypothetical protein, conserved                                  |
| PVX_098625 | 0         | 0         | 0         | 0         | 0         | 0         | 0         | 0         | 0         | 0          | 0          | 0          | hypothetical protein, conserved                                  |
| PVX_098630 | 0         | 0         | 0         | 0         | 14.1014   | 0         | 135.957   | 123.49    | 16.8457   | 31.2461    | 115.053    | 0          | tubulin alpha chain, putative                                    |
| PVX_098635 | 0         | 0         | 0         | 0         | 0         | 0         | 0         | 0         | 0         | 0          | 0          | 0          | LCCL domain-containing protein                                   |
| PVX_098640 | 452.46    | 263.315   | 187.649   | 723.582   | 167.541   | 386.163   | 346.218   | 419.009   | 428.65    | 423.885    | 390.278    | 366.555    | 60S ribosomal protein L32, putative (RPL32)                      |
| PVX_098645 | 0         | 221.487   | 0         | 253.615   | 0         | 0         | 242.702   | 0         | 210.321   | 83.5608    | 157.821    | 0          | GTPase-activating protein, putative                              |
| PVX_098650 | 40.1608   | 0         | 0         | 0         | 12.7294   | 0         | 0         | 0         | 22.8197   | 28.2262    | 11.9904    | 32.4852    | AP-4 complex subunit epsilon, putative                           |
| PVX_098655 | 0         | 0         | 0         | 0         | 0         | 0         | 0         | 91.686    | 0         | 23.1915    | 0          | 0          | hypothetical protein, conserved                                  |
| PVX_098660 | 0         | 0         | 0         | 41.7333   | 0         | 0         | 0         | 0         | 0         | 0          | 0          | 0          | hypothetical protein, conserved                                  |
| PVX_098665 | 252.266   | 0         | 0         | 0         | 0         | 0         | 0         | 0         | 0         | 88.5468    | 50.2264    | 0          | signal peptidase complex subunit 3, putative                     |
| PVX_098670 | 0         | 0         | 291.919   | 0         | 0         | 0         | 179.562   | 0         | 0         | 0          | 139.953    | 0          | prefoldin subunit, putative                                      |
| PVX_098675 | 35.8278   | 0         | 0         | 0         | 5.67769   | 0         | 27.3649   | 74.6106   | 13.5716   | 12.5905    | 21.3934    | 0          | ubiquitin carboxyl-terminal hydrolase, putative                  |
| PVX_098680 | 0         | 0         | 0         | 0         | 0         | 0         | 0         | 0         | 0         | 0          | 97.9667    | 0          | bacterial histone-like protein, putative (HU)                    |
| PVX_098685 | 58.3111   | 40.7129   | 145.03    | 0         | 36.9992   | 0         | 178.379   | 80.9865   | 66.2833   | 81.9498    | 116.068    | 0          | replication protein A1, small fragment, putative                 |
| PVX_098690 | 14.8691   | 0         | 36.937    | 0         | 18.8492   | 0         | 0         | 41.2848   | 22.5292   | 41.8028    | 59.1904    | 0          | copper-transporting ATPase, putative (CuTP)                      |
| PVX_098695 | 0         | 96.8615   | 0         | 444.05    | 0         | 0         | 0         | 0         | 52.5403   | 48.6724    | 193.12     | 0          | hypothetical protein, conserved                                  |
| PVX_098700 | 29.5614   | 41.2564   | 0         | 0         | 14.0528   | 0         | 0         | 20.5197   | 16.7964   | 0          | 17.6515    | 0          | nucleoporin NUP100/NSP100, putative (NUP100)                     |
| PVX_098705 | 0         | 19.7862   | 70.4518   | 0         | 0         | 0         | 0         | 0         | 0         | 9.96212    | 33.8568    | 0          | mitochondrial carrier protein, putative                          |
| PVX_098710 | 0         | 0         | 0         | 0         | 0         | 0         | 0         | 0         | 0         | 0          | 0          | 0          | dynein heavy chain, putative                                     |
| PVX_098712 | 72.4715   | 0         | 0         | 0         | 0         | 0         | 0         | 0         | 0         | 0          | 0          | 0          | high molecular weight rho-tryptin protein 3, putative (RhopH3)   |
| PVX_098715 | 0         | 0         | 0         | 0         | 0         | 0         | 0         | 0         | 0         | 0          | 0          | 0          | hypothetical protein, conserved                                  |
| PVX_098720 | 0         | 0         | 0         | 0         | 0         | 0         | 0         | 0         | 0         | 0          | 0          | 0          | hypothetical protein, conserved                                  |
| PVX_098725 | 0         | 38.291    | 0         | 175.316   | 17.3984   | 0         | 0         | 76.1697   | 0         | 19.2699    | 21.8336    | 0          | autophagy-related protein 3, putative (ATG3)                     |
| PVX_098730 | 0         | 31.1518   | 0         | 0         | 0         | 0         | 0         | 30.9871   | 25.364    | 23.5293    | 13.3271    | 0          | hypothetical protein, conserved                                  |
| PVX_098735 | 0         | 88.0144   | 0         | 201.416   | 9.99515   | 0         | 0         | 0         | 0         | 77.5454    | 50.1995    | 0          | coatamer complex beta subunit, putative (SEC27)                  |
| PVX_098740 | 0         | 0         | 0         | 0         | 0         | 0         | 0         | 0         | 4.82221   | 4.4739     | 7.60165    | 0          | endonuclease/exonuclease/phosphatase domain containing protein   |
| PVX_098745 | 0         | 11.263    | 0         | 0         | 5.1153    | 0         | 0         | 22.4073   | 18.3415   | 5.67201    | 25.7002    | 0          | exoribonuclease II, putative (RNaseII)                           |
| PVX_098750 | 0         | 0         | 0         | 0         | 0         | 0         | 0         | 0         | 0         | 0          | 46.5292    | 0          | vacuolar protein sorting-associated protein 46, putative (VP546) |
| PVX_098755 | 0         | 0         | 0         | 0         | 0         | 0         | 0         | 0         | 0         | 0          | 24.4735    | 99.5681    | hypothetical protein, conserved                                  |
| PVX_098760 | 69.9847   | 0         | 0         | 0         | 44.419    | 0         | 0         | 0         | 106.079   | 49.175     | 153.237    | 0          | Maf-like protein, putative                                       |
| PVX_098765 | 0         | 0         | 0         | 0         | 0         | 0         | 0         | 0         | 0         | 0          | 0          | 0          | dynein light intermediate chain 2, putative                      |
| PVX_098770 | 0         | 0         | 0         | 0         | 0         | 0         | 0         | 0         | 0         | 0          | 0          | 0          | arginase, putative                                               |
| PVX_098775 | 38.7794   | 81.207    | 0         | 0         | 36.8915   | 0         | 0         | 53.8492   | 88.1506   | 81.7582    | 69.4695    | 0          | zinc finger protein, putative                                    |
| PVX_098780 | 64.2563   | 44.8672   | 0         | 0         | 40.7775   | 0         | 0         | 89.2488   | 73.0442   | 90.3024    | 63.9515    | 0          | leucine-rich repeat protein                                      |
| PVX_098784 | 0         | 0         | 0         | 2171.28   | 215       | 0         | 0         | 0         | 0         | 0          | 399.006    | 0          | hypothetical protein                                             |
| PVX_098786 | 0         | 104.131   | 0         | 0         | 0         | 0         | 0         | 414.161   | 0         | 104.631    | 29.6555    | 0          | tubulin-specific chaperone, putative                             |
| PVX_098795 | 0         | 0         | 0         | 0         | 125.136   | 0         | 0         | 0         | 148.572   | 137.222    | 0          | 639.553    | hypothetical protein                                             |

| Gene ID    | Patient 1 | Patient 2 | Patient 3 | Patient 4 | Patient 5 | Patient 6 | Patient 7 | Patient 8 | Patient 9 | Patient 10 | Patient 11 | Patient 12 | Gene Description                                                                                   |
|------------|-----------|-----------|-----------|-----------|-----------|-----------|-----------|-----------|-----------|------------|------------|------------|----------------------------------------------------------------------------------------------------|
| Patient    |           |           |           |           |           |           |           |           |           |            |            |            |                                                                                                    |
| PVX_098800 | 23.0668   | 0         | 0         | 0         | 7.31178   | 0         | 70.4843   | 32.0256   | 8.73801   | 0          | 36.7298    | 0          | hypothetical protein, conserved                                                                    |
| PVX_098805 | 0         | 0         | 0         | 0         | 0         | 0         | 0         | 35.9144   | 9.79896   | 9.08977    | 20.5944    | 0          | TBC domain containing protein                                                                      |
| PVX_098810 | 243.892   | 0         | 0         | 0         | 0         | 0         | 0         | 169.371   | 23.1034   | 0          | 121.367    | 0          | hypothetical protein, conserved                                                                    |
| PVX_098815 | 118.182   | 82.4945   | 97.9278   | 0         | 24.9844   | 201.512   | 0         | 109.406   | 14.9246   | 55.369     | 70.5705    | 0          | ATP-dependent heat shock protein, putative                                                         |
| PVX_098820 | 0         | 0         | 0         | 0         | 0         | 0         | 0         | 0         | 0         | 0          | 58.6626    | 0          | hypothetical protein                                                                               |
| PVX_098825 | 262.911   | 0         | 0         | 120.001   | 11.9097   | 0         | 57.41     | 52.1536   | 56.9168   | 105.58     | 82.2345    | 0          | hypothetical protein, conserved                                                                    |
| PVX_098830 | 129.03    | 60.0475   | 106.928   | 0         | 95.4808   | 0         | 131.508   | 119.453   | 228.13    | 196.464    | 196.902    | 278.498    | proteasome activator complex subunit 3, putative;subunit of proteasome activator complex, putative |
| PVX_098835 | 0         | 0         | 0         | 0         | 199.966   | 0         | 0         | 436.056   | 0         | 109.894    | 62.3593    | 0          | ribosomal protein L35, putative                                                                    |
| PVX_098840 | 0         | 0         | 0         | 0         | 0         | 0         | 0         | 0         | 64.9171   | 60.1148    | 102.244    | 0          | peptide deformylase, putative (PDF)                                                                |
| PVX_098845 | 0         | 0         | 0         | 0         | 0         | 0         | 0         | 0         | 30.9512   | 28.6921    | 81.2872    | 0          | S1/P1nuclease, putative                                                                            |
| PVX_098847 | 0         | 0         | 0         | 0         | 21.0237   | 0         | 0         | 0         | 25.1055   | 0          | 26.3761    | 0          | conserved Plasmodium membrane protein, unknown function                                            |
| PVX_098850 | 0         | 0         | 0         | 0         | 5.86441   | 0         | 0         | 0         | 14.0178   | 0          | 11.0483    | 0          | hypothetical protein, conserved                                                                    |
| PVX_098855 | 0         | 51.5329   | 0         | 0         | 70.2611   | 0         | 0         | 102.505   | 139.818   | 25.9251    | 102.822    | 119.56     | hypothetical protein, conserved                                                                    |
| PVX_098860 | 92.9553   | 0         | 0         | 0         | 0         | 0         | 0         | 0         | 35.2297   | 0          | 0          | 0          | hypothetical protein, conserved                                                                    |
| PVX_098865 | 0         | 0         | 0         | 0         | 0         | 0         | 0         | 0         | 0         | 0          | 3.07128    | 0          | hypothetical protein, conserved                                                                    |
| PVX_098870 | 0         | 0         | 219.886   | 0         | 0         | 0         | 67.6084   | 61.4093   | 0         | 0          | 17.6042    | 0          | ribosomal RNA methyltransferase, putative                                                          |
| PVX_098875 | 0         | 0         | 310.694   | 0         | 0         | 0         | 0         | 0         | 47.2653   | 0          | 49.6413    | 0          | tRNA pseudouridine synthase, putative                                                              |
| PVX_098880 | 0         | 46.4701   | 0         | 212.802   | 0         | 0         | 0         | 92.4365   | 25.2176   | 46.7623    | 39.7407    | 0          | transporter, putative                                                                              |
| PVX_098885 | 34.3445   | 0         | 0         | 0         | 10.8896   | 0         | 0         | 0         | 13.0112   | 0          | 34.1803    | 0          | hypothetical protein, conserved                                                                    |
| PVX_098890 | 0         | 0         | 0         | 130.174   | 12.9191   | 0         | 0         | 113.142   | 15.4343   | 42.9443    | 0          | 65.9438    | hypothetical protein, conserved                                                                    |
| PVX_098895 | 0         | 0         | 0         | 0         | 0         | 0         | 0         | 0         | 0         | 0          | 10.694     | 0          | hypothetical protein, conserved                                                                    |
| PVX_098900 | 0         | 0         | 0         | 0         | 0         | 0         | 0         | 0         | 0         | 0          | 0          | 0          | GDP-fucose protein O-fucosyltransferase 2, putative (POFUT2)                                       |
| PVX_098905 | 464.051   | 325.7     | 0         | 0         | 0         | 0         | 0         | 0         | 0         | 162.712    | 184.837    | 0          | apoptosis-related protein, putative (ARP)                                                          |
| PVX_098910 | 46.3846   | 48.5567   | 0         | 0         | 7.35159   | 0         | 0         | 0         | 17.5712   | 24.45      | 27.6973    | 0          | exoribonuclease, putative                                                                          |
| PVX_098915 | 0         | 0         | 0         | 143.444   | 0         | 0         | 0         | 0         | 0         | 0          | 0          | 0          | subpellicular microtubule protein 1, putative (SPM1)                                               |
| PVX_098920 | 0         | 41.3328   | 0         | 0         | 0         | 0         | 0         | 82.2194   | 22.4307   | 20.7991    | 23.5669    | 0          | hypothetical protein, conserved                                                                    |
| PVX_098925 | 0         | 0         | 0         | 0         | 0         | 0         | 0         | 42.3844   | 11.5641   | 10.7266    | 12.1518    | 0          | hypothetical protein, conserved                                                                    |
| PVX_098930 | 0         | 0         | 0         | 0         | 0         | 0         | 0         | 0         | 0         | 211.145    | 0          | 0          | small nuclear ribonucleoprotein (snRNP), putative                                                  |
| PVX_098935 | 22.4928   | 0         | 0         | 0         | 7.12974   | 0         | 0         | 0         | 25.5617   | 31.6168    | 17.9079    | 36.3903    | DEAD/DEAH box helicase, putative                                                                   |
| PVX_098940 | 0         | 0         | 0         | 0         | 9.40809   | 0         | 0         | 0         | 0         | 0          | 0          | 0          | SET domain protein, putative (SET4)                                                                |
| PVX_098945 | 26.4401   | 129.171   | 131.405   | 0         | 16.7635   | 0         | 40.4004   | 36.7104   | 30.0484   | 37.1646    | 99.991     | 42.7813    | Ran-binding protein, putative                                                                      |
| PVX_098950 | 19.8197   | 13.8295   | 24.6141   | 31.6377   | 3.14024   | 202.589   | 0         | 27.5139   | 30.0292   | 10.4479    | 13.807     | 0          | hypothetical protein, conserved                                                                    |
| PVX_098955 | 0         | 0         | 0         | 0         | 23.537    | 0         | 113.489   | 0         | 28.1028   | 26.0539    | 44.2857    | 0          | hypothetical protein, conserved                                                                    |
| PVX_098960 | 0         | 0         | 0         | 0         | 17.1281   | 0         | 0         | 0         | 10.2339   | 113.917    | 43.0166    | 0          | selenophosphate synthetase, putative                                                               |
| PVX_098965 | 0         | 0         | 0         | 0         | 0         | 0         | 0         | 26.681    | 21.8395   | 6.75351    | 19.1257    | 0          | DNA repair protein REV1, putative                                                                  |
| PVX_098970 | 0         | 0         | 0         | 0         | 71.8558   | 0         | 0         | 313.791   | 171.13    | 79.1841    | 224.54     | 0          | prenylated protein, putative                                                                       |
| PVX_098975 | 0         | 0         | 0         | 0         | 0         | 0         | 0         | 77.8402   | 0         | 0          | 0          | 0          | actin-like protein, putative                                                                       |
| PVX_098980 | 0         | 54.9333   | 0         | 0         | 24.9672   | 0         | 0         | 0         | 0         | 55.2667    | 0          | 0          | cytosolic Fe-S cluster assembly factor NBP35, putative (NBP35)                                     |
| PVX_098985 | 0         | 86.7425   | 154.509   | 0         | 0         | 0         | 95.0202   | 0         | 0         | 43.6474    | 86.5491    | 0          | DNA primase large subunit, putative                                                                |
| PVX_098990 | 0         | 0         | 0         | 0         | 0         | 0         | 0         | 0         | 0         | 0          | 0          | 0          | phosphatidylinositol N-acetylglucosaminyltransferase, putative                                     |
| PVX_098995 | 0         | 0         | 0         | 0         | 0         | 0         | 0         | 0         | 0         | 0          | 0          | 0          | hypothetical protein, conserved                                                                    |
| PVX_099000 | 0         | 0         | 0         | 0         | 0         | 0         | 0         | 0         | 0         | 0          | 28.4705    | 0          | hypothetical protein, conserved                                                                    |
| PVX_099005 | 0         | 0         | 0         | 0         | 0         | 0         | 0         | 0         | 0         | 0          | 1.85127    | 0          | cysteine repeat modular protein 1, putative (CRMP1)                                                |
| PVX_099010 | 0         | 31.0048   | 0         | 0         | 0         | 0         | 0         | 30.8409   | 16.8296   | 31.2245    | 17.6857    | 0          | hypothetical protein, conserved                                                                    |
| PVX_099015 | 0         | 0         | 0         | 0         | 0         | 0         | 0         | 0         | 0         | 0          | 39.5267    | 0          | hypothetical protein, conserved                                                                    |
| PVX_099020 | 0         | 0         | 173.307   | 0         | 22.1056   | 0         | 106.584   | 0         | 26.3958   | 73.4181    | 97.0592    | 0          | hypothetical protein, conserved                                                                    |
| PVX_099025 | 0         | 0         | 0         | 113.021   | 11.2171   | 0         | 54.0702   | 98.244    | 53.6087   | 62.154     | 105.622    | 0          | GTP-binding protein, putative                                                                      |
| PVX_099030 | 0         | 0         | 0         | 0         | 0         | 0         | 0         | 0         | 0         | 33.9217    | 19.2225    | 0          | hypothetical protein, conserved                                                                    |
| PVX_099035 | 434.519   | 354.01    | 360.386   | 0         | 114.918   | 0         | 110.82    | 100.596   | 82.3289   | 279.87     | 201.816    | 0          | inhibitor of cysteine proteases, putative (ICP)                                                    |
| PVX_099040 | 0         | 14.9529   | 0         | 136.855   | 0         | 0         | 0         | 29.7479   | 0         | 0          | 21.3237    | 0          | hypothetical protein, conserved                                                                    |
| PVX_099045 | 0         | 0         | 0         | 0         | 19.5051   | 0         | 0         | 0         | 0         | 21.5989    | 36.7102    | 99.5681    | hypothetical protein, conserved                                                                    |
| PVX_099050 | 0         | 0         | 0         | 0         | 0         | 0         | 0         | 0         | 0         | 0          | 0          | 0          | hypothetical protein, conserved                                                                    |
| PVX_099055 | 0         | 0         | 0         | 0         | 25.0333   | 0         | 0         | 0         | 29.8869   | 83.1191    | 78.4932    | 0          | hypothetical protein, conserved                                                                    |
| PVX_099060 | 0         | 41.5528   | 0         | 0         | 18.8815   | 0         | 0         | 0         | 45.1002   | 41.8193    | 47.3845    | 0          | hypothetical protein, conserved                                                                    |
| PVX_099065 | 0         | 0         | 0         | 0         | 0         | 0         | 0         | 0         | 0         | 0          | 5.44113    | 0          | hypothetical protein, conserved                                                                    |
| PVX_099070 | 0         | 0         | 3063.01   | 0         | 0         | 0         | 0         | 0         | 0         | 0          | 238.079    | 0          | hypothetical protein, conserved                                                                    |
| PVX_099075 | 0         | 33.0426   | 117.687   | 0         | 0         | 0         | 72.3713   | 0         | 35.8661   | 0          | 18.8426    | 0          | tRNA (adenine(58)-N(1))-methyltransferase non-catalytic subunit TRM6, putative (GCD10)             |
| PVX_099080 | 140.409   | 49.0242   | 0         | 0         | 111.397   | 0         | 0         | 0         | 266.03    | 172.652    | 307.436    | 227.467    | 265 proteasome regulatory subunit RPN8, putative (RPN8)                                            |
| PVX_099085 | 169.895   | 118.791   | 0         | 0         | 108.096   | 0         | 521.579   | 236.22    | 64.4235   | 119.317    | 67.6451    | 0          | hypothetical protein, conserved                                                                    |
| PVX_099090 | 0         | 0         | 0         | 0         | 0         | 0         | 0         | 0         | 0         | 0          | 0          | 0          | hypothetical protein, conserved                                                                    |
| PVX_099095 | 429.944   | 180.176   | 0         | 275.111   | 136.495   | 440.474   | 263.28    | 597.298   | 456.23    | 332.285    | 427.917    | 278.734    | elongation factor 1B, putative                                                                     |
| PVX_099100 | 106.302   | 0         | 0         | 0         | 0         | 0         | 0         | 0         | 20.1385   | 18.6749    | 42.3185    | 0          | hypothetical protein, conserved                                                                    |

| Gene ID    | Patient 1 | Patient 2 | Patient 3 | Patient 4 | Patient 5 | Patient 6 | Patient 7 | Patient 8 | Patient 9 | Patient 10 | Patient 11 | Patient 12 | Gene Description                                   |                                                                                                                           |
|------------|-----------|-----------|-----------|-----------|-----------|-----------|-----------|-----------|-----------|------------|------------|------------|----------------------------------------------------|---------------------------------------------------------------------------------------------------------------------------|
| Patient    |           |           |           |           |           |           |           |           |           |            |            |            |                                                    |                                                                                                                           |
| PVX_099105 | 0         | 0         | 0         | 0         | 0         | 0         | 0         | 0         | 0         | 0          | 74.5659    | 0          | hypothetical protein, conserved                    |                                                                                                                           |
| PVX_099107 | 0         | 0         | 0         | 0         | 24.836    | 0         | 0         | 0         | 59.3032   | 0          | 31.1502    | 0          | protease, putative                                 |                                                                                                                           |
| PVX_099110 | 91.2963   | 0         | 0         | 0         | 9.64821   | 0         | 0         | 0         | 11.5287   | 21.3875    | 24.2291    | 0          | hypothetical protein, conserved                    |                                                                                                                           |
| PVX_099115 | 43.7245   | 30.5228   | 0         | 0         | 27.7339   | 0         | 0         | 0         | 16.5658   | 46.0908    | 95.7351    | 0          | hypothetical protein, conserved                    |                                                                                                                           |
| PVX_099117 | 0         | 0         | 0         | 0         | 0         | 0         | 0         | 0         | 0         | 0          | 0          | 0          | conserved Plasmodium protein, unknown function     |                                                                                                                           |
| PVX_099120 | 0         | 45.7484   | 0         | 0         | 10.3908   | 0         | 0         | 0         | 12.4155   | 34.5479    | 26.0925    | 0          | arginine-tRNA ligase, putative                     |                                                                                                                           |
| PVX_099125 | 80.8156   | 0         | 0         | 0         | 12.814    | 0         | 123.541   | 56.1113   | 61.2354   | 28.3969    | 16.086     | 0          | pseudouridylylase, putative                        |                                                                                                                           |
| PVX_099130 | 0         | 0         | 0         | 0         | 0         | 0         | 0         | 0         | 11.4585   | 10.6287    | 12.0409    | 0          | hypothetical protein, conserved                    |                                                                                                                           |
| PVX_099135 | 84.6868   | 0         | 210.788   | 0         | 26.8849   | 0         | 0         | 0         | 32.0941   | 59.5011    | 16.8575    | 0          | phospholipid or glycerol acyltransferase, putative |                                                                                                                           |
| PVX_099140 | 0         | 31.5404   | 0         | 0         | 14.3295   | 0         | 69.0783   | 0         | 0         | 15.8754    | 17.9864    | 0          | Met-10+ domain containing protein                  |                                                                                                                           |
| PVX_099145 | 0         | 0         | 0         | 0         | 0         | 0         | 0         | 227.566   | 62.0643   | 57.4782    | 0          | 0          | hypothetical protein, conserved                    |                                                                                                                           |
| PVX_099150 | 0         | 0         | 0         | 0         | 5.64041   | 0         | 0         | 0         | 0         | 0          | 0          | 21.253     | 0                                                  | hypothetical protein, conserved                                                                                           |
| PVX_099155 | 0         | 0         | 0         | 0         | 0         | 0         | 0         | 0         | 0         | 0          | 0          | 327.997    | 0                                                  | zinc binding protein, putative                                                                                            |
| PVX_099160 | 0         | 0         | 0         | 0         | 0         | 0         | 0         | 0         | 0         | 0          | 0          | 28.4623    | 115.827                                            | transporter, putative                                                                                                     |
| PVX_099165 | 0         | 0         | 0         | 0         | 0         | 0         | 0         | 0         | 0         | 0          | 0          | 0          | 0                                                  | GINS complex subunit Psf3, putative                                                                                       |
| PVX_099170 | 0         | 0         | 0         | 0         | 0         | 0         | 0         | 0         | 0         | 0          | 0          | 0          | 0                                                  | hypothetical protein                                                                                                      |
| PVX_099175 | 30.6825   | 42.8299   | 76.2538   | 0         | 0         | 0         | 0         | 42.6024   | 58.1179   | 10.7817    | 61.0713    | 49.6516    | 0                                                  | BSD-domain protein, putative                                                                                              |
| PVX_099180 | 0         | 0         | 0         | 0         | 0         | 0         | 0         | 0         | 0         | 44.9576    | 38.2063    | 0          | 0                                                  | type II NADH:ubiquinone oxidoreductase, putative                                                                          |
| PVX_099185 | 0         | 0         | 810.305   | 0         | 0         | 0         | 0         | 0         | 122.748   | 0          | 257.552    | 0          | 0                                                  | SUMO-conjugating enzyme UBC9, putative (UBC9)                                                                             |
| PVX_099190 | 0         | 0         | 0         | 0         | 32.8692   | 0         | 0         | 287.595   | 39.225    | 0          | 144.206    | 0          | 0                                                  | ribonuclease H2 subunit C, putative                                                                                       |
| PVX_099195 | 91.4712   | 0         | 0         | 0         | 0         | 0         | 0         | 63.5129   | 69.3119   | 48.2102    | 27.3105    | 0          | 0                                                  | hypothetical protein, conserved                                                                                           |
| PVX_099200 | 110.139   | 92.2358   | 0         | 0         | 20.9468   | 112.62    | 134.614   | 30.5828   | 83.4437   | 100.63     | 87.6883    | 35.6375    | 0                                                  | 6-phosphofructokinase, putative                                                                                           |
| PVX_099205 | 0         | 0         | 0         | 0         | 15.8164   | 0         | 0         | 0         | 0         | 17.5202    | 0          | 0          | 0                                                  | hypothetical protein, conserved                                                                                           |
| PVX_099210 | 0         | 0         | 379.06    | 0         | 0         | 0         | 233.193   | 0         | 0         | 0          | 121.04     | 246.82     | 0                                                  | hypothetical protein, conserved                                                                                           |
| PVX_099215 | 0         | 0         | 0         | 0         | 31.4125   | 0         | 0         | 0         | 0         | 34.7462    | 78.7597    | 0          | 0                                                  | hypothetical protein, conserved                                                                                           |
| PVX_099220 | 0         | 0         | 0         | 0         | 0         | 0         | 0         | 0         | 0         | 0          | 0          | 0          | 0                                                  | glycolipid transfer protein, putative                                                                                     |
| PVX_099225 | 0         | 0         | 0         | 0         | 0         | 0         | 0         | 0         | 0         | 73.3836    | 62.3796    | 0          | 0                                                  | hypothetical protein, conserved                                                                                           |
| PVX_099230 | 0         | 0         | 0         | 0         | 6.38763   | 0         | 0         | 0         | 0         | 0          | 0          | 0          | 0                                                  | sugar transporter, putative                                                                                               |
| PVX_099235 | 129.935   | 0         | 0         | 0         | 0         | 0         | 0         | 0         | 0         | 0          | 25.8659    | 0          | 0                                                  | thioredoxin 3, putative (TRX3)                                                                                            |
| PVX_099240 | 29.6458   | 0         | 0         | 94.6981   | 0         | 0         | 0         | 0         | 33.6922   | 10.4175    | 41.3054    | 0          | 0                                                  | hypothetical protein, conserved                                                                                           |
| PVX_099245 | 0         | 0         | 0         | 0         | 0         | 0         | 0         | 0         | 0         | 0          | 0          | 0          | 0                                                  | hypothetical protein, conserved                                                                                           |
| PVX_099247 | 31.7817   | 0         | 0         | 0         | 5.03625   | 0         | 24.273    | 44.1223   | 42.1357   | 11.1688    | 31.629     | 0          | 0                                                  | conserved Plasmodium protein, unknown function                                                                            |
| PVX_099250 | 0         | 0         | 0         | 0         | 0         | 408.958   | 0         | 110.926   | 121.042   | 84.157     | 31.7895    | 0          | 0                                                  | ubiquitin fusion degradation protein 1, putative (UFD1)                                                                   |
| PVX_099255 | 34.9071   | 24.3649   | 0         | 0         | 0         | 0         | 53.3524   | 0         | 26.4488   | 36.7979    | 6.94805    | 0          | 0                                                  | methyltransferase, putative                                                                                               |
| PVX_099257 | 0         | 76.3662   | 0         | 0         | 0         | 0         | 0         | 0         | 0         | 0          | 0          | 0          | 0                                                  | RNA-binding protein musashi, putative (HoMu)                                                                              |
| PVX_099263 | 0         | 0         | 0         | 0         | 0         | 0         | 0         | 0         | 3742.76   | 0          | 0          | 0          | 0                                                  | conserved Plasmodium protein, unknown function                                                                            |
| PVX_099265 | 0         | 0         | 0         | 0         | 0         | 0         | 0         | 0         | 0         | 0          | 69.3571    | 0          | 0                                                  | hypothetical protein, conserved                                                                                           |
| PVX_099270 | 15.9503   | 0         | 0         | 0         | 5.05511   | 0         | 0         | 0         | 12.0838   | 0          | 28.5726    | 0          | 0                                                  | hypothetical protein, conserved                                                                                           |
| PVX_099275 | 0         | 34.6374   | 0         | 158.575   | 15.7374   | 0         | 227.603   | 0         | 112.79    | 34.8657    | 19.7515    | 0          | 0                                                  | N-glycosylase/DNA lyase, putative (OGG1)                                                                                  |
| PVX_099280 | 0         | 0         | 0         | 0         | 0         | 0         | 0         | 0         | 0         | 0          | 0          | 0          | 0                                                  | hypothetical protein, conserved                                                                                           |
| PVX_099285 | 0         | 0         | 0         | 0         | 0         | 0         | 0         | 0         | 0         | 0          | 0          | 0          | 0                                                  | hypothetical protein, conserved                                                                                           |
| PVX_099290 | 0         | 0         | 0         | 0         | 0         | 0         | 0         | 0         | 0         | 0          | 0          | 0          | 0                                                  | hypothetical protein, conserved                                                                                           |
| PVX_099295 | 0         | 35.2236   | 125.461   | 0         | 16.0039   | 0         | 77.1527   | 0         | 38.2327   | 17.7276    | 120.513    | 81.6922    | 0                                                  | hypothetical protein, conserved                                                                                           |
| PVX_099300 | 115.736   | 0         | 0         | 0         | 0         | 0         | 0         | 53.5705   | 58.463    | 54.2236    | 30.7156    | 62.4435    | 0                                                  | pre-mRNA splicing factor ATP-dependent RNA helicase PRP43, putative                                                       |
| PVX_099305 | 0         | 0         | 0         | 0         | 0         | 0         | 0         | 0         | 38.9545   | 36.1022    | 0          | 0          | 0                                                  | XPA binding protein 1, putative                                                                                           |
| PVX_099310 | 0         | 0         | 0         | 785.968   | 0         | 0         | 125.359   | 0         | 124.145   | 0          | 81.5104    | 132.72     | 0                                                  | hypothetical protein, conserved                                                                                           |
| PVX_099315 | 409.527   | 540.006   | 565.668   | 581.664   | 187.611   | 698.415   | 347.853   | 884.657   | 672.354   | 687.501    | 697.406    | 368.327    | 78                                                 | 78 kDa glucose-regulated protein precursor (GRP 78), putative,heat shock protein, putative,DnaK domain containing protein |
| PVX_099320 | 0         | 0         | 156.578   | 0         | 0         | 0         | 0         | 87.4272   | 0         | 0          | 12.5294    | 101.953    | 0                                                  | glideosome-associated protein 50, putative (GAP50)                                                                        |
| PVX_099325 | 0         | 0         | 470.566   | 604.84    | 0         | 0         | 0         | 0         | 0         | 198.561    | 112.584    | 306.402    | 0                                                  | cytochrome b5-like Heme/Steroid binding domain containing protein                                                         |
| PVX_099330 | 107.855   | 0         | 0         | 0         | 0         | 0         | 0         | 0         | 122.642   | 0          | 85.8797    | 0          | 0                                                  | 50S ribosomal protein L3, apicoplast, putative                                                                            |
| PVX_099335 | 0         | 246.917   | 0         | 377.2     | 0         | 603.962   | 180.511   | 0         | 491.154   | 165.494    | 187.587    | 764.333    | 0                                                  | eukaryotic translation initiation factor 3 subunit 5, putative                                                            |
| PVX_099340 | 0         | 0         | 0         | 0         | 0         | 0         | 28.0043   | 0         | 6.94428   | 0          | 14.5953    | 0          | 0                                                  | hypothetical protein, conserved                                                                                           |
| PVX_099345 | 0         | 0         | 0         | 142.018   | 14.0944   | 0         | 0         | 0         | 50.5121   | 15.6153    | 61.9207    | 0          | 0                                                  | ATP-dependent DNA helicase Q1, putative (RECQ1)                                                                           |
| PVX_099350 | 0         | 0         | 0         | 0         | 0         | 0         | 0         | 0         | 0         | 0          | 0          | 0          | 0                                                  | hypothetical protein                                                                                                      |
| PVX_099355 | 0         | 148.607   | 0         | 0         | 0         | 272.32    | 81.3805   | 0         | 20.1625   | 18.6971    | 21.1844    | 0          | 0                                                  | tRNA-dihydrouridine synthase A, putative                                                                                  |
| PVX_099360 | 30.905    | 43.1406   | 153.615   | 0         | 19.5965   | 158.049   | 47.2295   | 85.823    | 46.8315   | 86.8791    | 79.9685    | 0          | 0                                                  | gamma-glutamylcysteine synthetase, putative                                                                               |
| PVX_099365 | 697.022   | 139.12    | 495.896   | 318.699   | 221.359   | 510.275   | 762.523   | 276.704   | 603.841   | 594.626    | 554.999    | 322.896    | 0                                                  | nucleosome assembly protein 1, putative                                                                                   |
| PVX_099370 | 128.976   | 135.087   | 0         | 0         | 20.4623   | 0         | 0         | 89.5705   | 122.179   | 67.9707    | 102.691    | 0          | 0                                                  | DNAI-like molecular chaperone protein, putative                                                                           |
| PVX_099375 | 0         | 0         | 0         | 0         | 0         | 0         | 0         | 0         | 0         | 0          | 0          | 0          | 0                                                  | hypothetical protein, conserved                                                                                           |
| PVX_099380 | 0         | 0         | 0         | 0         | 0         | 0         | 0         | 0         | 0         | 0          | 0          | 0          | 0                                                  | thioredoxin-like protein 1, putative (TrxL1)                                                                              |
| PVX_099385 | 0         | 0         | 0         | 0         | 20.9771   | 0         | 101.14    | 0         | 25.0498   | 46.4515    | 39.4764    | 107.084    | 0                                                  | protein disulfide isomerase, putative                                                                                     |
| PVX_099390 | 0         | 52.1788   | 185.922   | 238.974   | 47.4284   | 0         | 0         | 0         | 56.6282   | 26.2496    | 29.7457    | 242.121    | 0                                                  | sugar transporter, putative                                                                                               |

| Gene ID    | Patient | Patient 1 | Patient 2 | Patient 3 | Patient 4 | Patient 5 | Patient 6 | Patient 7 | Patient 8 | Patient 9 | Patient 10 | Patient 11 | Patient 12 | Gene Description                                                         |
|------------|---------|-----------|-----------|-----------|-----------|-----------|-----------|-----------|-----------|-----------|------------|------------|------------|--------------------------------------------------------------------------|
| PVX_099395 |         | 67.1491   | 0         | 0         | 214.722   | 63.9244   | 0         | 0         | 186.539   | 25.4447   | 70.7748    | 66.8309    | 0          | dolichyl-diphosphooligosaccharide--protein glycosyltransferase, putative |
| PVX_099400 |         | 0         | 119.018   | 0         | 0         | 0         | 0         | 0         | 64.5462   | 119.544   | 33.8869    | 0          | 0          | hypothetical protein, conserved                                          |
| PVX_099405 |         | 33.063    | 0         | 0         | 0         | 0         | 0         | 50.5308   | 0         | 25.0512   | 11.6181    | 19.7429    | 0          | TLD domain-containing protein                                            |
| PVX_099410 |         | 0         | 0         | 0         | 0         | 0         | 0         | 0         | 0         | 0         | 4.18964    | 0          | 0          | hypothetical protein, conserved                                          |
| PVX_099415 |         | 0         | 42.924    | 0         | 196.548   | 0         | 0         | 0         | 0         | 0         | 0          | 12.2367    | 0          | GNS1/SUR4 domain containing protein                                      |
| PVX_099420 |         | 0         | 106.257   | 0         | 0         | 48.3353   | 0         | 0         | 0         | 172.897   | 53.381     | 151.3      | 0          | co-chaperone Hsc20, putative                                             |
| PVX_099425 |         | 33.2102   | 0         | 82.5416   | 0         | 21.0594   | 0         | 0         | 46.1133   | 25.1627   | 46.6791    | 66.1027    | 0          | hypothetical protein, conserved                                          |
| PVX_099430 |         | 0         | 0         | 0         | 0         | 0         | 0         | 0         | 0         | 0         | 0          | 0          | 0          | hypothetical protein, conserved                                          |
| PVX_099435 |         | 18.9735   | 13.2406   | 0         | 60.5893   | 0         | 0         | 28.9846   | 26.3416   | 14.3745   | 13.3352    | 26.4354    | 0          | hypothetical protein, conserved                                          |
| PVX_099440 |         | 0         | 0         | 0         | 0         | 0         | 0         | 0         | 0         | 0         | 0          | 143.401    | 0          | ADP-ribosylation factor-like protein, putative                           |
| PVX_099445 |         | 0         | 17.7753   | 63.2887   | 0         | 0         | 0         | 0         | 0         | 19.2967   | 17.9002    | 25.3474    | 41.2096    | hypothetical protein, conserved                                          |
| PVX_099450 |         | 0         | 0         | 0         | 0         | 0         | 0         | 0         | 0         | 0         | 0          | 0          | 0          | hypothetical protein, conserved                                          |
| PVX_099455 |         | 146.49    | 204.534   | 0         | 0         | 61.9522   | 249.851   | 223.996   | 135.624   | 222.009   | 205.885    | 194.389    | 79.0587    | inosine-5'-monophosphate dehydrogenase, putative                         |
| PVX_099460 |         | 146.141   | 0         | 0         | 0         | 0         | 0         | 0         | 101.5     | 110.758   | 77.0134    | 72.7246    | 0          | RNA-binding protein, putative                                            |
| PVX_099465 |         | 180.519   | 378.71    | 0         | 579.089   | 114.886   | 927.329   | 554.382   | 251.018   | 205.371   | 380.315    | 35.938     | 0          | ubiquitin-conjugating enzyme E2, putative                                |
| PVX_099470 |         | 0         | 0         | 0         | 0         | 0         | 0         | 0         | 0         | 0         | 0          | 6.63984    | 0          | WD domain, G-beta repeat domain containing protein                       |
| PVX_099475 |         | 0         | 0         | 0         | 0         | 0         | 0         | 0         | 0         | 66.0556   | 122.334    | 208.071    | 0          | hypothetical protein, conserved                                          |
| PVX_099480 |         | 0         | 39.1605   | 0         | 44.7964   | 4.44626   | 71.7129   | 0         | 38.9545   | 21.2576   | 29.5828    | 25.1324    | 22.6931    | hypothetical protein, conserved                                          |
| PVX_099485 |         | 0         | 0         | 0         | 0         | 0         | 0         | 0         | 0         | 75.3165   | 46.5546    | 0          | 0          | hypothetical protein, conserved                                          |
| PVX_099490 |         | 0         | 0         | 0         | 0         | 0         | 0         | 0         | 418.346   | 57.0502   | 105.686    | 29.9548    | 0          | NiRu-like scaffold protein, putative                                     |
| PVX_099495 |         | 0         | 0         | 408.78    | 0         | 26.0691   | 0         | 125.705   | 0         | 31.1217   | 28.85      | 81.7348    | 0          | hypothetical protein, conserved                                          |
| PVX_099500 |         | 0         | 13.757    | 0         | 0         | 12.4965   | 0         | 0         | 27.3688   | 7.46749   | 6.92754    | 19.6186    | 0          | hypothetical protein, conserved                                          |
| PVX_099505 |         | 0         | 0         | 0         | 0         | 15.0522   | 0         | 145.127   | 0         | 35.9612   | 50.025     | 56.6777    | 0          | hypothetical protein, conserved                                          |
| PVX_099507 |         | 0         | 39.9318   | 0         | 182.835   | 0         | 0         | 0         | 0         | 21.6707   | 0          | 34.1528    | 0          | hypothetical protein, conserved                                          |
| PVX_099510 |         | 73.6719   | 102.896   | 183.315   | 0         | 23.3817   | 0         | 225.48    | 102.336   | 0         | 0          | 77.6472    | 102.653    | 50S ribosomal protein L29, putative                                      |
| PVX_099515 |         | 0         | 0         | 0         | 0         | 0         | 0         | 0         | 0         | 0         | 0          | 7.61978    | 0          | WD domain, G-beta repeat domain containing protein                       |
| PVX_099520 |         | 55.9829   | 91.1572   | 46.3615   | 0         | 17.7437   | 0         | 57.0136   | 155.445   | 148.445   | 104.924    | 85.4282    | 30.1877    | ubiquitin-like protein, putative                                         |
| PVX_099525 |         | 665.954   | 464.886   | 883.041   | 425.63    | 352.011   | 0         | 814.526   | 554.878   | 504.619   | 514.794    | 892.541    | 503.107    | S-adenosylmethionine synthetase, putative                                |
| PVX_099528 |         | 0         | 0         | 0         | 0         | 0         | 0         | 0         | 0         | 0         | 0          | 0          | 0          | conserved Plasmodium protein, unknown function                           |
| PVX_099530 |         | 31.4591   | 0         | 0         | 100.495   | 0         | 0         | 0         | 0         | 0         | 11.0545    | 6.2617     | 0          | para-aminobenzoic acid synthetase, putative                              |
| PVX_099535 |         | 1887.5    | 912.528   | 1445.06   | 3018.28   | 437.754   | 371.722   | 2443.98   | 2319.34   | 2365.84   | 2652.48    | 1632.91    | 1058.55    | phosphoglycerate kinase, putative                                        |
| PVX_099540 |         | 125.275   | 43.7358   | 0         | 0         | 19.8742   | 320.632   | 0         | 0         | 71.203    | 66.0208    | 37.404     | 0          | glutamine synthetase, putative                                           |
| PVX_099545 |         | 80.9341   | 113.049   | 0         | 258.902   | 25.6912   | 0         | 0         | 224.863   | 0         | 28.4327    | 80.552     | 0          | pre-mRNA splicing factor, putative                                       |
| PVX_099550 |         | 7.9354    | 11.0738   | 0         | 25.3327   | 10.0578   | 0         | 0         | 22.0316   | 15.0286   | 5.57757    | 9.47661    | 0          | hypothetical protein, conserved                                          |
| PVX_099555 |         | 0         | 0         | 0         | 0         | 0         | 0         | 0         | 0         | 0         | 0          | 0          | 0          | 3-oxoacyl-[acyl-carrier-protein] reductase, putative (FabG)              |
| PVX_099560 |         | 0         | 0         | 0         | 0         | 0         | 0         | 0         | 107.657   | 58.738    | 81.6801    | 77.1336    | 0          | DNA-directed RNA polymerase II, putative                                 |
| PVX_099565 |         | 0         | 139.804   | 0         | 0         | 0         | 0         | 0         | 0         | 0         | 70.174     | 119.375    | 0          | OTU-like cysteine protease, putative                                     |
| PVX_099570 |         | 0         | 0         | 0         | 13.9283   | 0         | 0         | 67.1433   | 0         | 16.639    | 15.4314    | 26.2249    | 0          | NADPH-cytochrome p450 reductase, putative (CPR)                          |
| PVX_099575 |         | 0         | 0         | 0         | 0         | 0         | 0         | 0         | 0         | 0         | 0          | 8.29003    | 0          | perforin-like protein 3 (PLP3)                                           |
| PVX_099580 |         | 0         | 0         | 0         | 70.6269   | 0         | 113.066   | 0         | 0         | 16.7547   | 23.3142    | 26.4105    | 35.7785    | hypothetical protein, conserved                                          |
| PVX_099585 |         | 0         | 0         | 0         | 0         | 0         | 0         | 0         | 0         | 0         | 0          | 0          | 0          | cyclin-dependent kinases regulatory subunit, putative                    |
| PVX_099590 |         | 0         | 0         | 216.962   | 0         | 0         | 0         | 121.09    | 66.0649   | 66.0649   | 30.6194    | 138.801    | 141.272    | lipoate-protein ligase 2, putative (LipL2)                               |
| PVX_099595 |         | 0         | 0         | 0         | 0         | 44.4689   | 0         | 0         | 0         | 0         | 0          | 0          | 0          | conserved protein, unknown function                                      |
| PVX_099600 |         | 62.2452   | 0         | 309.665   | 0         | 39.4992   | 0         | 95.2189   | 86.4537   | 141.514   | 131.215    | 161.069    | 201.634    | thioredoxin reductase 2, putative                                        |
| PVX_099605 |         | 220.559   | 308.633   | 0         | 708.335   | 0         | 0         | 0         | 0         | 83.6643   | 77.4296    | 131.735    | 0          | RNA-binding protein, putative                                            |
| PVX_099610 |         | 0         | 0         | 0         | 1833.71   | 0         | 0         | 0         | 0         | 0         | 0          | 0          | 0          | hypothetical protein                                                     |
| PVX_099615 |         | 0         | 0         | 0         | 0         | 9.01329   | 0         | 0         | 0         | 0         | 9.9906     | 0          | 46.005     | patatin-like phospholipase, putative                                     |
| PVX_099620 |         | 0         | 0         | 0         | 0         | 35.7625   | 0         | 0         | 0         | 21.3566   | 39.6075    | 44.8774    | 0          | hypothetical protein, conserved                                          |
| PVX_099625 |         | 0         | 23.2317   | 0         | 0         | 10.5532   | 0         | 0         | 0         | 12.6094   | 0          | 6.62502    | 0          | hypothetical protein, conserved                                          |
| PVX_099630 |         | 93.4406   | 0         | 0         | 0         | 29.6702   | 0         | 0         | 0         | 70.8275   | 98.4729    | 55.8006    | 0          | thiamine pyrophosphokinase, putative                                     |
| PVX_099635 |         | 30.1858   | 0         | 0         | 192.849   | 9.57005   | 0         | 0         | 0         | 45.7414   | 21.2144    | 42.0577    | 48.847     | conserved Plasmodium protein, unknown function                           |
| PVX_099640 |         | 0         | 0         | 63.2347   | 0         | 0         | 0         | 0         | 0         | 0         | 0          | 0          | 0          | hypothetical protein, conserved                                          |
| PVX_099645 |         | 14.2898   | 0         | 0         | 0         | 4.52865   | 0         | 0         | 0         | 0         | 0          | 2.84422    | 0          | hypothetical protein, conserved                                          |
| PVX_099650 |         | 0         | 36.9102   | 131.473   | 0         | 0         | 0         | 80.8508   | 73.4234   | 40.0628   | 37.1514    | 84.1871    | 85.607     | splicing factor 3A subunit 3, putative                                   |
| PVX_099655 |         | 0         | 0         | 0         | 0         | 0         | 0         | 0         | 0         | 0         | 0          | 0          | 0          | telomeric repeat binding factor 1, putative                              |
| PVX_099660 |         | 0         | 0         | 0         | 0         | 0         | 0         | 0         | 0         | 0         | 0          | 0          | 0          | alpha-tubulin N-acetyltransferase, putative                              |
| PVX_099665 |         | 0         | 0         | 0         | 0         | 0         | 0         | 0         | 0         | 0         | 0          | 0          | 0          | hypothetical protein, conserved                                          |
| PVX_099670 |         | 0         | 0         | 0         | 0         | 0         | 0         | 0         | 0         | 0         | 0          | 0          | 0          | hypothetical protein, conserved                                          |
| PVX_099675 |         | 0         | 149.181   | 0         | 0         | 0         | 0         | 0         | 98.9136   | 0         | 25.0177    | 14.1745    | 0          | hypothetical protein, conserved                                          |
| PVX_099680 |         | 0         | 0         | 0         | 0         | 19.9161   | 0         | 0         | 87.1818   | 23.7843   | 88.2129    | 124.942    | 0          | proline-tRNA ligase, putative                                            |
| PVX_099685 |         | 0         | 21.7431   | 0         | 0         | 19.7535   | 0         | 0         | 43.2551   | 47.2066   | 21.8936    | 12.4013    | 0          | protein phosphatase-beta, putative                                       |
| PVX_099690 |         | 0         | 0         | 0         | 0         | 0         | 0         | 697.175   | 1255.13   | 171.012   | 157.837    | 89.6421    | 0          | thioredoxin-like protein 2, putative (TLP2)                              |

| Gene ID    | Patient 1 | Patient 2 | Patient 3 | Patient 4 | Patient 5 | Patient 6 | Patient 7 | Patient 8 | Patient 9 | Patient 10 | Patient 11 | Patient 12 | Gene Description                                                                           |
|------------|-----------|-----------|-----------|-----------|-----------|-----------|-----------|-----------|-----------|------------|------------|------------|--------------------------------------------------------------------------------------------|
| Patient    |           |           |           |           |           |           |           |           |           |            |            |            |                                                                                            |
| PVX_099695 | 0         | 0         | 0         | 0         | 0         | 0         | 0         | 373.672   | 0         | 47.2113    | 53.5193    | 0          | zinc binding protein (Yippee), putative                                                    |
| PVX_099700 | 59.6322   | 166.544   | 0         | 0         | 0         | 0         | 91.2141   | 165.645   | 45.1904   | 20.9515    | 59.349     | 0          | histone deacetylase, putative (HDAC1)                                                      |
| PVX_099705 | 22.1587   | 0         | 0         | 0         | 14.0475   | 0         | 0         | 0         | 8.39396   | 23.3604    | 13.2314    | 0          | hypothetical protein, conserved                                                            |
| PVX_099710 | 106.317   | 594.214   | 0         | 340.345   | 33.7697   | 0         | 162.867   | 295.461   | 282.083   | 336.108    | 105.819    | 0          | hypothetical protein, conserved                                                            |
| PVX_099715 | 26.7964   | 0         | 0         | 0         | 8.49478   | 0         | 40.9453   | 0         | 30.4533   | 28.249     | 69.3368    | 43.3582    | protein kinase, putative                                                                   |
| PVX_099725 | 0         | 13.0902   | 0         | 29.946    | 5.94469   | 0         | 0         | 13.0215   | 24.8709   | 13.186     | 28.0049    | 45.5105    | protein kinase, putative                                                                   |
| PVX_099735 | 0         | 0         | 0         | 0         | 0         | 0         | 0         | 0         | 0         | 0          | 130.206    | 0          | hypothetical protein                                                                       |
| PVX_099740 | 67.5484   | 0         | 0         | 0         | 10.7087   | 0         | 0         | 0         | 12.7951   | 0          | 20.1676    | 0          | protein kinase, putative                                                                   |
| PVX_099745 | 0         | 62.9853   | 0         | 0         | 14.3078   | 0         | 0         | 62.6481   | 0         | 0          | 35.9184    | 0          | transporter, putative                                                                      |
| PVX_099750 | 60.7455   | 14.1306   | 0         | 0         | 0         | 0         | 0         | 28.112    | 0         | 14.2312    | 32.2421    | 0          | hypothetical protein, conserved                                                            |
| PVX_099755 | 0         | 0         | 0         | 0         | 0         | 0         | 0         | 0         | 0         | 0          | 0          | 0          | hypothetical protein                                                                       |
| PVX_099760 | 0         | 0         | 0         | 0         | 0         | 0         | 0         | 0         | 10.2617   | 0          | 0          | 0          | hypothetical protein, conserved                                                            |
| PVX_099765 | 37.2772   | 26.0199   | 185.321   | 119.101   | 47.2814   | 0         | 56.979    | 51.7624   | 84.735    | 39.2958    | 111.297    | 120.669    | glutamine-dependent NAD(+) synthetase, putative (NADSYN)                                   |
| PVX_099770 | 55.5902   | 19.3989   | 69.0722   | 0         | 8.8116    | 0         | 0         | 0         | 0         | 0          | 5.53239    | 0          | hypothetical protein                                                                       |
| PVX_099780 | 0         | 0         | 0         | 0         | 0         | 0         | 0         | 0         | 54.4826   | 100.937    | 171.646    | 0          | replication termination factor, putative                                                   |
| PVX_099785 | 0         | 0         | 0         | 0         | 106.76    | 0         | 515.759   | 0         | 0         | 117.269    | 199.66     | 0          | nuclear movement protein, putative                                                         |
| PVX_099790 | 0         | 165.351   | 0         | 1518.33   | 75.2905   | 0         | 363.465   | 657.476   | 179.276   | 0          | 658.6      | 384.581    | hypothetical protein, conserved                                                            |
| PVX_099800 | 0         | 0         | 0         | 0         | 0         | 0         | 0         | 0         | 0         | 8.94246    | 20.2606    | 0          | zinc finger protein, putative                                                              |
| PVX_099805 | 0         | 0         | 115.306   | 0         | 0         | 0         | 0         | 0         | 52.7115   | 65.1795    | 36.9236    | 0          | fumarate hydratase, putative                                                               |
| PVX_099810 | 0         | 0         | 0         | 0         | 0         | 0         | 0         | 0         | 0         | 0          | 7.53277    | 0          | hypothetical protein, conserved                                                            |
| PVX_099815 | 0         | 0         | 0         | 0         | 0         | 0         | 0         | 0         | 0         | 0          | 0          | 0          | cytoplasmic dynein light chain, putative                                                   |
| PVX_099820 | 0         | 39.8807   | 0         | 182.601   | 36.2425   | 0         | 87.3647   | 0         | 0         | 40.1382    | 22.7395    | 92.5027    | hypothetical protein, conserved                                                            |
| PVX_099825 | 124.166   | 0         | 309.396   | 0         | 78.9124   | 636.764   | 380.634   | 0         | 141.205   | 43.6109    | 123.587    | 0          | serine/threonine protein phosphatase 4, putative (PPP4)                                    |
| PVX_099830 | 0         | 0         | 252.742   | 0         | 32.2339   | 0         | 155.454   | 0         | 76.9364   | 35.652     | 60.6108    | 0          | cytochrome c oxidase subunit 5B, putative (COX5B)                                          |
| PVX_099835 | 0         | 0         | 0         | 0         | 0         | 0         | 0         | 0         | 628.83    | 1146.42    | 0          | 0          | hypothetical protein                                                                       |
| PVX_099840 | 103.85    | 217.652   | 0         | 0         | 65.9679   | 0         | 159.074   | 0         | 0         | 109.437    | 20.6726    | 0          | phosphatidylserine decarboxylase, putative (PSD)                                           |
| PVX_099845 | 0         | 161.501   | 0         | 0         | 0         | 0         | 0         | 0         | 0         | 81.0198    | 137.852    | 0          | cytochrome c oxidase subunit 6B, putative (COX6B)                                          |
| PVX_099850 | 0         | 0         | 0         | 0         | 0         | 0         | 0         | 0         | 0         | 0          | 36.0704    | 0          | hypothetical protein, conserved                                                            |
| PVX_099855 | 0         | 0         | 0         | 0         | 0         | 0         | 0         | 0         | 0         | 17.818     | 50.4701    | 0          | hypothetical protein, conserved                                                            |
| PVX_099860 | 0         | 0         | 0         | 0         | 0         | 0         | 0         | 0         | 87.5542   | 0          | 45.9506    | 0          | hypothetical protein                                                                       |
| PVX_099870 | 126.268   | 0         | 314.653   | 0         | 0         | 0         | 0         | 0         | 47.866    | 44.3488    | 0          | 0          | hypothetical protein, conserved                                                            |
| PVX_099875 | 0         | 0         | 0         | 0         | 0         | 0         | 0         | 0         | 0         | 0          | 0          | 0          | hypothetical protein, conserved                                                            |
| PVX_099880 | 0         | 0         | 0         | 0         | 0         | 0         | 0         | 0         | 0         | 0          | 0          | 0          | hypothetical protein, conserved                                                            |
| PVX_099885 | 0         | 0         | 36.7903   | 0         | 4.69358   | 0         | 0         | 20.5604   | 5.60993   | 10.4092    | 38.321     | 0          | hypothetical protein                                                                       |
| PVX_099890 | 0         | 39.8045   | 0         | 0         | 18.0866   | 0         | 0         | 158.36    | 43.2032   | 0          | 102.132    | 0          | serine/threonine protein kinase, putative                                                  |
| PVX_099895 | 230.797   | 161.501   | 0         | 0         | 0         | 0         | 0         | 0         | 0         | 0          | 137.852    | 0          | guanylate kinase, putative                                                                 |
| PVX_099900 | 0         | 0         | 0         | 0         | 0         | 0         | 147.563   | 0         | 0         | 33.8487    | 0          | 0          | unspecified product                                                                        |
| PVX_099905 | 0         | 0         | 0         | 264.17    | 0         | 0         | 0         | 0         | 31.2941   | 29.0097    | 49.3124    | 0          | transcription initiation factor TFIIID subunit 7, putative (TAF7)                          |
| PVX_099910 | 0         | 0         | 0         | 0         | 0         | 0         | 0         | 0         | 0         | 33.4527    | 37.913     | 0          | hypothetical protein, conserved                                                            |
| PVX_099915 | 135.441   | 189.318   | 337.598   | 0         | 86.1018   | 694.821   | 0         | 188.252   | 51.3464   | 47.5683    | 107.849    | 219.822    | RNA-binding protein, putative                                                              |
| PVX_099920 | 51.6778   | 0         | 0         | 0         | 0         | 0         | 0         | 0         | 0         | 18.1575    | 0          | 0          | hypothetical protein, conserved                                                            |
| PVX_099930 | 0         | 31.9733   | 0         | 0         | 0         | 0         | 0         | 31.8043   | 17.3552   | 8.04986    | 13.6785    | 74.1228    | high molecular weight rhoptry protein 2 (RhopH2)                                           |
| PVX_099935 | 0         | 0         | 0         | 0         | 0         | 0         | 0         | 0         | 0         | 0          | 0          | 0          | conserved protein, unknown function                                                        |
| PVX_099940 | 144.634   | 0         | 0         | 0         | 0         | 0         | 0         | 0         | 0         | 0          | 0          | 0          | G2 protein, putative                                                                       |
| PVX_099944 | 96.775    | 0         | 0         | 0         | 61.4631   | 0         | 0         | 268.917   | 73.3566   | 135.98     | 57.7921    | 0          | hypothetical protein, conserved                                                            |
| PVX_099946 | 0         | 0         | 0         | 0         | 0         | 0         | 0         | 0         | 0         | 0          | 182.146    | 0          | hypothetical protein, conserved                                                            |
| PVX_099955 | 0         | 0         | 0         | 0         | 0         | 0         | 0         | 0         | 0         | 0          | 0          | 0          | hypothetical protein, conserved                                                            |
| PVX_099960 | 0         | 31.8948   | 0         | 0         | 0         | 0         | 0         | 126.896   | 17.3103   | 16.0537    | 72.7537    | 0          | hypothetical protein, conserved                                                            |
| PVX_099965 | 27.5639   | 0         | 0         | 0         | 17.4765   | 0         | 0         | 0         | 31.3258   | 29.058     | 38.4046    | 0          | hypothetical protein, conserved                                                            |
| PVX_099970 | 0         | 0         | 0         | 0         | 0         | 0         | 0         | 0         | 0         | 0          | 0          | 0          | hypothetical protein, conserved                                                            |
| PVX_099975 | 0         | 0         | 0         | 0         | 0         | 0         | 0         | 0         | 0         | 0          | 0          | 0          | merozoite surface protein 1 paralogue (MSP1P)                                              |
| PVX_099980 | 17.7118   | 0         | 0         | 0         | 0         | 0         | 0         | 0         | 0         | 0          | 7.05069    | 0          | merozoite surface protein 1 (MSP1)                                                         |
| PVX_099985 | 63.4535   | 22.1441   | 78.8513   | 0         | 0         | 0         | 96.973    | 44.0528   | 48.077    | 22.2972    | 44.2049    | 51.3429    | hypothetical protein, conserved                                                            |
| PVX_099990 | 21.8024   | 15.2153   | 0         | 0         | 6.91077   | 0         | 0         | 30.2698   | 8.25897   | 0          | 30.3769    | 0          | diacylglycerol kinase, putative                                                            |
| PVX_099995 | 50.9714   | 0         | 0         | 0         | 0         | 0         | 0         | 141.575   | 19.3124   | 17.9093    | 40.583     | 82.5309    | cyclophilin, putative, rotamase, putative, peptidyl-prolyl cis-trans isomerase 4, putative |
| PVX_100000 | 0         | 0         | 0         | 0         | 0         | 0         | 186.411   | 0         | 69.263    | 0          | 12.1284    | 0          | hypothetical protein, conserved                                                            |
| PVX_100005 | 0         | 4.98878   | 17.7575   | 0         | 0         | 0         | 0         | 0         | 0         | 2.51274    | 4.26927    | 11.5626    | hypothetical protein, conserved                                                            |
| PVX_100010 | 0         | 0         | 0         | 0         | 0         | 0         | 0         | 0         | 0         | 0          | 37.2923    | 0          | hypothetical protein                                                                       |
| PVX_100510 | 0         | 0         | 0         | 0         | 0         | 0         | 0         | 0         | 0         | 0          | 0          | 0          | hypothetical protein, conserved                                                            |
| PVX_100515 | 0         | 0         | 0         | 0         | 0         | 0         | 0         | 0         | 5.44502   | 0          | 2.86112    | 0          | amino acid transporter, putative                                                           |
| PVX_100520 | 0         | 194.748   | 0         | 0         | 0         | 0         | 0         | 0         | 0         | 0          | 0          | 0          | mitosis protein dim1, putative                                                             |
| PVX_100525 | 0         | 0         | 0         | 0         | 17.4658   | 0         | 0         | 0         | 10.4355   | 0          | 5.483      | 0          | pre-mRNA splicing factor RNA helicase, putative                                            |



| Gene ID    | Patient 1 | Patient 2 | Patient 3 | Patient 4 | Patient 5 | Patient 6 | Patient 7 | Patient 8 | Patient 9 | Patient 10 | Patient 11 | Patient 12 | Gene Description                                          |
|------------|-----------|-----------|-----------|-----------|-----------|-----------|-----------|-----------|-----------|------------|------------|------------|-----------------------------------------------------------|
| Patient    |           |           |           |           |           |           |           |           |           |            |            |            |                                                           |
| PVX_100530 | 213.203   | 0         | 0         | 0         | 0         | 0         | 0         | 0         | 0         | 149.7      | 42.4466    | 346.791    | hypothetical protein                                      |
| PVX_100535 | 0         | 0         | 0         | 0         | 12.6541   | 0         | 81.3168   | 18.4777   | 5.04169   | 0          | 13.246     | 0          | hypothetical protein, conserved                           |
| PVX_100540 | 50.5647   | 17.6447   | 0         | 80.75     | 0         | 129.273   | 0         | 35.1025   | 19.1549   | 17.7687    | 35.2256    | 0          | hypothetical protein, conserved                           |
| PVX_100545 | 126.336   | 0         | 0         | 201.968   | 0         | 0         | 0         | 0         | 47.8709   | 22.1933    | 62.8681    | 0          | phenylalanyl-tRNA synthetase alpha chain, putative        |
| PVX_100550 | 46.3755   | 0         | 115.306   | 0         | 29.4173   | 0         | 141.813   | 257.608   | 228.416   | 114.064    | 110.771    | 75.0796    | chaperonin CPN60, mitochondrial precursor, putative       |
| PVX_100555 | 66.9983   | 93.567    | 166.678   | 0         | 42.5204   | 0         | 0         | 93.0597   | 50.7751   | 47.0772    | 106.689    | 0          | dihydrodipolyl dehydrogenase, mitochondrial (LPD1)        |
| PVX_100560 | 131.462   | 91.8731   | 327.643   | 0         | 125.346   | 0         | 201.546   | 365.428   | 49.8366   | 46.1717    | 78.5098    | 0          | cytochrome b5, putative                                   |
| PVX_100565 | 0         | 0         | 0         | 0         | 0         | 0         | 0         | 0         | 0         | 0          | 13.5492    | 0          | hypothetical protein, conserved                           |
| PVX_100570 | 0         | 0         | 0         | 0         | 0         | 0         | 0         | 0         | 0         | 0          | 7.36459    | 0          | F-box domain containing protein                           |
| PVX_100575 | 0         | 138.349   | 0         | 0         | 0         | 0         | 0         | 0         | 0         | 0          | 0          | 0          | hypothetical protein, conserved                           |
| PVX_100580 | 0         | 25.5723   | 0         | 0         | 0         | 0         | 0         | 0         | 13.8796   | 38.6203    | 43.7534    | 0          | hypothetical protein, conserved                           |
| PVX_100590 | 0         | 0         | 0         | 0         | 0         | 0         | 419.226   | 0         | 0         | 0          | 0          | 0          | hypothetical protein, conserved                           |
| PVX_100595 | 63.1678   | 0         | 0         | 0         | 0         | 0         | 96.6331   | 0         | 47.8709   | 22.1933    | 37.7209    | 102.314    | hypothetical protein, conserved                           |
| PVX_100600 | 42.1194   | 0         | 104.711   | 0         | 26.7147   | 0         | 0         | 175.467   | 95.745    | 44.3992    | 50.3021    | 68.181     | elongation factor G, putative                             |
| PVX_100610 | 102.541   | 143.27    | 0         | 328.221   | 0         | 0         | 157.063   | 284.956   | 233.191   | 108.058    | 142.884    | 0          | hypothetical protein, conserved                           |
| PVX_100620 | 0         | 0         | 0         | 0         | 0         | 0         | 0         | 0         | 0         | 0          | 6.86881    | 0          | hypothetical protein                                      |
| PVX_100625 | 52.4004   | 18.2854   | 0         | 0         | 0         | 0         | 0         | 0         | 9.92521   | 9.20684    | 31.2895    | 0          | hypothetical protein, conserved                           |
| PVX_100630 | 0         | 0         | 0         | 0         | 36.4522   | 294.035   | 87.8704   | 0         | 87.0723   | 80.7402    | 45.7418    | 0          | hypothetical protein, conserved                           |
| PVX_100635 | 13.4549   | 14.082    | 33.4163   | 21.4757   | 12.7898   | 0         | 10.2731   | 28.0164   | 40.7706   | 35.4642    | 44.1871    | 10.8793    | hypothetical protein, conserved                           |
| PVX_100640 | 0         | 0         | 0         | 0         | 0         | 0         | 310.31    | 0         | 51.2356   | 71.2558    | 40.3712    | 0          | homocysteine S-methyltransferase, putative                |
| PVX_100645 | 201.218   | 140.75    | 0         | 0         | 0         | 0         | 618.362   | 279.858   | 152.635   | 70.6468    | 40.0601    | 327.187    | hypothetical protein, conserved                           |
| PVX_100650 | 0         | 20.753    | 0         | 0         | 9.42686   | 0         | 45.4389   | 0         | 22.5287   | 20.8972    | 23.6737    | 0          | sentrin-specific protease 1, putative (SEN1)              |
| PVX_100655 | 0         | 0         | 0         | 0         | 0         | 0         | 0         | 275.172   | 37.5312   | 0          | 19.7117    | 0          | hypothetical protein, conserved                           |
| PVX_100657 | 0         | 12.5344   | 22.3087   | 0         | 0         | 45.9034   | 0         | 0         | 6.80428   | 6.31309    | 10.7264    | 14.526     | conserved Plasmodium protein, unknown function            |
| PVX_100660 | 14.9987   | 0         | 0         | 0         | 4.75339   | 0         | 0         | 0         | 0         | 0          | 17.9119    | 24.2607    | hypothetical protein, conserved                           |
| PVX_100665 | 0         | 6.02503   | 0         | 137.904   | 5.47448   | 0         | 13.1952   | 71.9136   | 19.6201   | 18.1963    | 26.1991    | 13.972     | hypothetical protein, conserved                           |
| PVX_100670 | 0         | 0         | 0         | 0         | 0         | 0         | 0         | 0         | 0         | 0          | 0          | 0          | aspartyl protease, putative                               |
| PVX_100675 | 227.38    | 52.9308   | 0         | 0         | 48.1125   | 0         | 115.994   | 0         | 143.61    | 106.51     | 165.957    | 0          | hypothetical protein, conserved                           |
| PVX_100680 | 0         | 0         | 0         | 209.159   | 10.3794   | 0         | 50.0312   | 0         | 37.2055   | 11.5033    | 45.6117    | 0          | hypothetical protein, conserved                           |
| PVX_100685 | 0         | 0         | 0         | 0         | 0         | 0         | 0         | 38.1302   | 0         | 0          | 27.3309    | 0          | hypothetical protein, conserved                           |
| PVX_100690 | 51.2892   | 35.7951   | 191.173   | 81.9078   | 8.12942   | 0         | 39.1839   | 71.2112   | 38.8588   | 54.0698    | 86.7737    | 82.9863    | splicing factor 3B subunit 3, putative                    |
| PVX_100695 | 326.763   | 0         | 0         | 523.861   | 103.936   | 0         | 250.739   | 227.15    | 0         | 114.747    | 325.256    | 265.38     | CHCH domain containing protein                            |
| PVX_100700 | 0         | 0         | 0         | 0         | 0         | 0         | 0         | 0         | 0         | 0          | 0          | 0          | PIH1 domain-containing protein, putative (PIH1)           |
| PVX_100705 | 577.829   | 0         | 1446.55   | 0         | 184.363   | 0         | 0         | 402.174   | 219.29    | 202.784    | 402.681    | 470.949    | hypothetical protein, conserved                           |
| PVX_100710 | 0         | 0         | 0         | 0         | 0         | 0         | 0         | 0         | 0         | 10.3591    | 0          | 47.7037    | vacuolar-type H+ pumping pyrophosphatase, putative (VP2)  |
| PVX_100715 | 40.497    | 56.5224   | 0         | 0         | 6.41799   | 103.518   | 30.9335   | 56.224    | 61.3621   | 49.8093    | 72.5447    | 32.7573    | hypothetical protein, conserved                           |
| PVX_100720 | 86.5296   | 0         | 71.6789   | 0         | 0         | 0         | 0         | 0         | 76.4865   | 20.2709    | 34.4461    | 46.6727    | tetQ family GTPase, putative                              |
| PVX_100725 | 0         | 70.1649   | 0         | 0         | 21.2488   | 0         | 0         | 0         | 12.6945   | 0          | 26.6787    | 54.2292    | hypothetical protein, conserved                           |
| PVX_100730 | 161.661   | 37.6219   | 268.021   | 0         | 68.3769   | 0         | 329.645   | 299.356   | 81.6701   | 75.734     | 139.44     | 87.259     | serine hydroxymethyltransferase, putative (SHMT)          |
| PVX_100735 | 135.544   | 0         | 112.333   | 0         | 57.3181   | 0         | 138.157   | 125.486   | 102.708   | 47.6262    | 143.891    | 0          | ATP synthase subunit beta, mitochondrial, putative        |
| PVX_100740 | 0         | 0         | 0         | 0         | 0         | 0         | 25.0198   | 22.7396   | 0         | 5.75609    | 3.26015    | 0          | hypothetical protein, conserved                           |
| PVX_100745 | 0         | 72.6129   | 86.1913   | 0         | 21.9904   | 0         | 53.0005   | 0         | 39.4118   | 36.5555    | 55.2182    | 112.244    | pre-mRNA-splicing factor SYF1, putative                   |
| PVX_100750 | 90.0556   | 0         | 0         | 0         | 0         | 461.363   | 0         | 0         | 34.13     | 0          | 71.7052    | 0          | vesicle transport v-SNARE protein VTI1, putative          |
| PVX_100755 | 0         | 47.5314   | 169.345   | 0         | 0         | 0         | 104.146   | 0         | 51.5865   | 47.8289    | 0          | 0          | clustered-asparagine-rich protein, putative               |
| PVX_100760 | 0         | 0         | 0         | 0         | 0         | 0         | 0         | 0         | 0         | 0          | 22.2039    | 0          | hypothetical protein, conserved                           |
| PVX_100765 | 89.7846   | 62.7131   | 0         | 0         | 28.5058   | 0         | 0         | 0         | 0         | 31.5406    | 0          | 291.069    | hypothetical protein, conserved                           |
| PVX_100770 | 106.113   | 37.0416   | 0         | 0         | 0         | 271.512   | 0         | 0         | 60.3081   | 37.2835    | 105.608    | 0          | hypothetical protein, conserved                           |
| PVX_100775 | 0         | 0         | 0         | 0         | 0         | 0         | 0         | 0         | 0         | 0          | 0          | 0          | hypothetical protein, conserved                           |
| PVX_100780 | 0         | 0         | 0         | 0         | 0         | 0         | 0         | 0         | 0         | 0          | 0          | 0          | p25-alpha family protein, putative                        |
| PVX_100785 | 0         | 48.416    | 0         | 0         | 22.0027   | 0         | 0         | 0         | 52.5461   | 24.359     | 41.4034    | 0          | S-adenosyl-methyltransferase mraW, putative               |
| PVX_100790 | 0         | 0         | 0         | 0         | 54.7839   | 0         | 0         | 0         | 0         | 60.6719    | 34.3725    | 0          | protein-S-isoprenylcysteine O-methyltransferase, putative |
| PVX_100795 | 0         | 0         | 232.634   | 0         | 0         | 0         | 0         | 0         | 141.655   | 65.6486    | 55.8006    | 0          | hypothetical protein, conserved                           |
| PVX_100800 | 52.8684   | 0         | 0         | 0         | 16.7706   | 0         | 0         | 73.4234   | 40.0628   | 18.5757    | 94.7104    | 0          | SUMO-activating enzyme subunit 2, putative (UBA2)         |
| PVX_100805 | 16.1402   | 0         | 40.0961   | 0         | 5.1153    | 82.5047   | 24.6541   | 22.4073   | 12.2277   | 34.0321    | 28.9127    | 26.108     | hypothetical protein, conserved                           |
| PVX_100810 | 55.2002   | 38.521    | 0         | 0         | 0         | 94.0629   | 0         | 25.5453   | 48.7899   | 25.8644    | 21.974     | 0          | hypothetical protein, conserved                           |
| PVX_100815 | 0         | 0         | 0         | 0         | 0         | 0         | 0         | 0         | 44.8275   | 0          | 23.5413    | 0          | hypothetical protein, conserved                           |
| PVX_100820 | 113.516   | 158.511   | 0         | 0         | 18.0062   | 290.486   | 0         | 0         | 107.528   | 59.8256    | 56.4882    | 0          | hypothetical protein, conserved                           |
| PVX_100825 | 0         | 23.5987   | 42.006    | 0         | 16.0769   | 0         | 0         | 0         | 32.0248   | 5.94204    | 23.5584    | 0          | hypothetical protein, conserved                           |
| PVX_100830 | 45.4107   | 126.802   | 225.807   | 0         | 28.8046   | 0         | 277.717   | 63.0615   | 34.4097   | 0          | 45.1942    | 0          | hypothetical protein, conserved                           |
| PVX_100835 | 142.334   | 198.97    | 354.849   | 456.104   | 90.4992   | 0         | 0         | 395.692   | 53.9622   | 49.9875    | 198.343    | 0          | hypothetical protein, conserved                           |
| PVX_100840 | 0         | 0         | 0         | 0         | 0         | 0         | 0         | 0         | 77.7176   | 71.9395    | 122.382    | 0          | ubiquitin-like modifier HUB1, putative (HUB1)             |
| PVX_100845 | 57.5936   | 60.2949   | 0         | 0         | 18.2588   | 0         | 0         | 0         | 54.5453   | 101.192    | 120.367    | 0          | hypothetical protein, conserved                           |

| Gene ID    | Patient 1 | Patient 2 | Patient 3 | Patient 4 | Patient 5 | Patient 6 | Patient 7 | Patient 8 | Patient 9 | Patient 10 | Patient 11 | Patient 12 | Gene Description                                                                |
|------------|-----------|-----------|-----------|-----------|-----------|-----------|-----------|-----------|-----------|------------|------------|------------|---------------------------------------------------------------------------------|
| PVX_100850 | 0         | 0         | 0         | 0         | 0         | 0         | 0         | 0         | 0         | 0          | 0          | 0          | COPI associated protein, putative                                               |
| PVX_100855 | 173.142   | 60.466    | 0         | 0         | 27.4843   | 0         | 132.534   | 120.269   | 131.234   | 182.473    | 206.791    | 140.313    | calyculin binding protein, putative                                             |
| PVX_100860 | 0         | 0         | 0         | 0         | 0         | 0         | 0         | 0         | 0         | 0          | 0          | 0          | hypothetical protein, conserved                                                 |
| PVX_100865 | 24.0654   | 33.5902   | 0         | 0         | 7.62852   | 0         | 0         | 33.4125   | 27.3491   | 25.3703    | 28.74      | 0          | cell cycle control protein, putative                                            |
| PVX_100870 | 0         | 0         | 0         | 0         | 0         | 0         | 0         | 0         | 0         | 0          | 25.0299    | 0          | hypothetical protein, conserved                                                 |
| PVX_100875 | 36.0515   | 0         | 0         | 0         | 0         | 0         | 0         | 25.0255   | 6.82817   | 0          | 3.58783    | 0          | hypothetical protein, conserved                                                 |
| PVX_100880 | 0         | 60.6895   | 0         | 0         | 0         | 0         | 0         | 0         | 16.4692   | 0          | 43.2623    | 0          | sphingomyelin phosphodiesterase, putative                                       |
| PVX_100885 | 148.928   | 34.6566   | 0         | 158.663   | 0         | 0         | 0         | 68.9411   | 56.4262   | 17.4425    | 98.8123    | 80.3762    | K+ channel tetramerisation domain containing protein                            |
| PVX_100890 | 87.0662   | 60.7781   | 108.23    | 0         | 41.4185   | 0         | 133.109   | 0         | 65.973    | 152.964    | 103.981    | 140.945    | long-chain-fatty-acid-CoA ligase, putative                                      |
| PVX_100895 | 0         | 0         | 0         | 0         | 0         | 0         | 0         | 0         | 0         | 0          | 0          | 0          | serine/threonine-protein kinase 2, putative                                     |
| PVX_100900 | 40.9065   | 28.5545   | 0         | 0         | 12.9723   | 0         | 0         | 0         | 0         | 0          | 16.2845    | 0          | HD domain containing protein                                                    |
| PVX_100905 | 282.386   | 65.751    | 0         | 301.222   | 0         | 0         | 0         | 0         | 107.024   | 165.329    | 18.7372    | 305.189    | 50S ribosomal protein L23, putative                                             |
| PVX_100910 | 24.9816   | 0         | 155.134   | 39.8803   | 11.875    | 63.8428   | 0         | 0         | 14.194    | 8.77922    | 17.403     | 60.6082    | transcription factor with AP2 domain(s), putative (ApiAP2)                      |
| PVX_100915 | 0         | 0         | 0         | 0         | 30.5989   | 0         | 0         | 0         | 36.5202   | 0          | 0          | 0          | hypothetical protein, conserved                                                 |
| PVX_100920 | 0         | 0         | 0         | 0         | 0         | 0         | 0         | 0         | 0         | 0          | 0          | 0          | hypothetical protein, conserved                                                 |
| PVX_100925 | 64.4126   | 0         | 0         | 102.885   | 0         | 0         | 0         | 44.7188   | 24.4019   | 22.6341    | 38.4626    | 52.1196    | DNA gyrase subunit B, putative                                                  |
| PVX_100930 | 73.6719   | 0         | 0         | 0         | 23.3817   | 0         | 112.74    | 0         | 83.7529   | 25.8824    | 87.988     | 0          | hydroxyethylthiazole kinase, putative                                           |
| PVX_100935 | 64.552    | 0         | 0         | 103.107   | 10.2333   | 165.066   | 49.3267   | 0         | 73.3642   | 68.0493    | 77.0917    | 0          | ATP-dependent zinc metalloprotease FTSH 1, putative (FTSH1)                     |
| PVX_100940 | 0         | 0         | 13.6506   | 0         | 0         | 0         | 0         | 0         | 0         | 0          | 7.65808    | 8.88843    | hypothetical protein, conserved                                                 |
| PVX_100945 | 0         | 0         | 0         | 0         | 0         | 0         | 0         | 0         | 0         | 0          | 12.8905    | 0          | vacuolar protein sorting-associated protein 16, putative (VPS16)                |
| PVX_100950 | 0         | 76.4882   | 0         | 0         | 17.3771   | 0         | 0         | 0         | 0         | 0          | 21.8069    | 0          | 3-hydroxyisobutyryl-coenzyme A hydrolase, putative                              |
| PVX_100955 | 73.6113   | 51.4056   | 0         | 0         | 0         | 0         | 0         | 102.252   | 0         | 103.444    | 161.179    | 238.529    | hypothetical protein, conserved                                                 |
| PVX_100960 | 27.5163   | 0         | 0         | 0         | 0         | 0         | 0         | 19.0999   | 5.21145   | 9.66994    | 5.4768     | 0          | hypothetical protein, conserved                                                 |
| PVX_100965 | 0         | 0         | 0         | 172.042   | 0         | 0         | 82.312    | 74.7488   | 40.7859   | 18.9107    | 42.853     | 87.1539    | hypothetical protein, conserved                                                 |
| PVX_100970 | 0         | 0         | 0         | 0         | 0         | 0         | 0         | 0         | 0         | 0          | 0          | 0          | hypothetical protein, conserved                                                 |
| PVX_100975 | 0         | 0         | 0         | 0         | 18.4996   | 0         | 0         | 80.9865   | 44.1888   | 61.4623    | 81.2478    | 0          | hypothetical protein, conserved                                                 |
| PVX_100980 | 61.9007   | 86.4423   | 0         | 197.91    | 19.6402   | 0         | 0         | 171.95    | 140.731   | 43.4965    | 98.5711    | 100.258    | mitochondrial carrier protein, putative                                         |
| PVX_100985 | 157.177   | 54.885    | 0         | 0         | 149.671   | 0         | 0         | 218.342   | 148.909   | 55.2182    | 93.8609    | 0          | replication factor C subunit 4, putative                                        |
| PVX_100990 | 0         | 26.1836   | 0         | 0         | 11.8947   | 191.872   | 57.3377   | 0         | 14.2113   | 26.3619    | 14.9329    | 0          | DEAD/DEAH box ATP-dependent RNA helicase, putative                              |
| PVX_100995 | 59.1591   | 82.6108   | 0         | 0         | 0         | 0         | 0         | 0         | 44.8317   | 62.3559    | 94.2051    | 0          | TPR domain containing protein                                                   |
| PVX_101000 | 0         | 0         | 0         | 0         | 0         | 0         | 0         | 0         | 0         | 0          | 12.2116    | 0          | hypothetical protein, conserved                                                 |
| PVX_101005 | 0         | 0         | 5762.39   | 0         | 0         | 0         | 0         | 0         | 0         | 0          | 0          | 0          | hypothetical protein, conserved                                                 |
| PVX_101010 | 262.481   | 73.3004   | 0         | 0         | 16.6524   | 268.64    | 160.561   | 72.9063   | 59.6711   | 110.67     | 114.942    | 85.0035    | queuine tRNA-ribosyltransferase, putative                                       |
| PVX_101015 | 0         | 197.669   | 0         | 0         | 29.9524   | 0         | 0         | 262.108   | 107.25    | 0          | 112.66     | 0          | hypothetical protein, conserved                                                 |
| PVX_101020 | 0         | 38.1739   | 0         | 174.78    | 0         | 0         | 0         | 151.874   | 0         | 0          | 43.5338    | 88.5405    | hypothetical protein, conserved                                                 |
| PVX_101025 | 78.4509   | 0         | 195.232   | 0         | 0         | 0         | 120.071   | 0         | 59.4592   | 137.804    | 93.6963    | 0          | hypothetical protein, conserved                                                 |
| PVX_101030 | 0         | 50.2877   | 0         | 0         | 0         | 0         | 0         | 0         | 27.2883   | 0          | 28.6685    | 0          | prenyltransferase alpha subunit, putative                                       |
| PVX_101035 | 1485.87   | 778.732   | 925.611   | 396.577   | 432.813   | 634.995   | 569.364   | 344.167   | 1173.45   | 869.805    | 739.468    | 401.799    | 40S ribosomal protein S17, putative                                             |
| PVX_101040 | 190.444   | 88.6515   | 315.825   | 0         | 100.712   | 0         | 0         | 440.859   | 264.598   | 289.945    | 265.357    | 0          | rab GDP dissociation inhibitor beta, putative                                   |
| PVX_101045 | 0         | 0         | 0         | 0         | 96.2495   | 0         | 0         | 1259.53   | 343.374   | 105.827    | 180.141    | 0          | mitochondrial import inner membrane translocase subunit TIM13, putative (TIM13) |
| PVX_101050 | 113.318   | 0         | 0         | 0         | 35.9994   | 0         | 0         | 0         | 128.859   | 79.6056    | 112.787    | 0          | t-SNARE, putative, syntaxin-like                                                |
| PVX_101055 | 0         | 69.0982   | 0         | 0         | 0         | 0         | 0         | 0         | 37.4896   | 34.7462    | 39.3799    | 0          | hypothetical protein, conserved                                                 |
| PVX_101060 | 127.71    | 89.2466   | 0         | 0         | 0         | 0         | 195.771   | 354.985   | 48.413    | 89.7095    | 50.8458    | 0          | hypothetical protein                                                            |
| PVX_101065 | 0         | 0         | 0         | 0         | 0         | 0         | 0         | 0         | 0         | 0          | 0          | 0          | hypothetical protein, conserved                                                 |
| PVX_101070 | 0         | 0         | 0         | 0         | 0         | 0         | 0         | 0         | 0         | 0          | 15.9947    | 0          | hypothetical protein, conserved                                                 |
| PVX_101075 | 0         | 0         | 0         | 0         | 0         | 0         | 0         | 0         | 0         | 0          | 73.6593    | 0          | vacuolar-sorting protein SNF7, putative                                         |
| PVX_101080 | 350.008   | 305.585   | 0         | 0         | 27.7805   | 0         | 0         | 121.564   | 132.647   | 92.2173    | 156.762    | 0          | translation initiation factor SUI1, putative                                    |
| PVX_101085 | 0         | 0         | 0         | 0         | 0         | 0         | 0         | 0         | 0         | 0          | 0          | 0          | ubiquitin-conjugating enzyme E2, putative                                       |
| PVX_101090 | 0         | 0         | 240.177   | 0         | 61.2639   | 0         | 147.723   | 268.047   | 109.679   | 101.656    | 76.8069    | 0          | hypothetical protein, conserved                                                 |
| PVX_101095 | 0         | 12.0174   | 0         | 0         | 0         | 0         | 0         | 0         | 0         | 0          | 0          | 0          | double C2-like domain-containing protein, putative (DOC2)                       |
| PVX_101100 | 37.4174   | 78.3536   | 0         | 0         | 0         | 0         | 0         | 0         | 28.3513   | 26.2958    | 37.2387    | 0          | glucose inhibited division protein a homologue, putative                        |
| PVX_101105 | 20.9402   | 43.8404   | 0         | 66.8734   | 13.2747   | 0         | 63.982    | 58.1451   | 63.4587   | 88.304     | 41.6794    | 0          | hypothetical protein, conserved                                                 |
| PVX_101110 | 81.5119   | 37.9259   | 67.5192   | 260.357   | 34.454    | 0         | 0         | 0         | 72.0503   | 66.8347    | 75.7132    | 87.9283    | hypothetical protein, conserved                                                 |
| PVX_101115 | 0         | 34.4046   | 0         | 0         | 0         | 0         | 37.661    | 0         | 28.0121   | 60.632     | 58.8732    | 0          | hypothetical protein, conserved                                                 |
| PVX_101120 | 0         | 0         | 98.8425   | 127.047   | 0         | 0         | 0         | 0         | 0         | 0          | 0          | 0          | hypothetical protein, conserved                                                 |
| PVX_101125 | 0         | 0         | 0         | 0         | 0         | 0         | 0         | 0         | 0         | 0          | 0          | 141.134    | GTP-ase activating protein for Arf containing protein                           |
| PVX_101130 | 0         | 0         | 0         | 665.43    | 0         | 0         | 318.552   | 0         | 0         | 72.7718    | 165.066    | 0          | hypothetical protein, conserved                                                 |
| PVX_101135 | 210.944   | 49.1013   | 0         | 224.864   | 22.3144   | 360.015   | 215.181   | 97.6693   | 159.869   | 148.22     | 111.971    | 0          | hypothetical protein, conserved                                                 |
| PVX_101140 | 0         | 0         | 0         | 0         | 0         | 0         | 0         | 0         | 0         | 12.2947    | 13.9287    | 0          | hypothetical protein, conserved                                                 |
| PVX_101145 | 0         | 42.6019   | 0         | 195.072   | 0         | 0         | 0         | 169.487   | 46.2383   | 0          | 24.2899    | 0          | hypothetical protein, conserved                                                 |
| PVX_101150 | 0         | 0         | 71.5405   | 0         | 0         | 0         | 0         | 0         | 0         | 0          | 5.72993    | 0          | kinesin-13, putative                                                            |
| PVX_101155 | 0         | 0         | 0         | 0         | 0         | 0         | 0         | 75.4269   | 20.5796   | 38.1797    | 21.6258    | 0          | hypothetical protein, conserved                                                 |

| Gene ID    | Patient | Patient 1 | Patient 2 | Patient 3 | Patient 4 | Patient 5 | Patient 6 | Patient 7 | Patient 8 | Patient 9 | Patient 10 | Patient 11 | Patient 12 | Gene Description                                                         |
|------------|---------|-----------|-----------|-----------|-----------|-----------|-----------|-----------|-----------|-----------|------------|------------|------------|--------------------------------------------------------------------------|
| PVX_101160 |         | 358.321   | 0         | 0         | 0         | 0         | 0         | 0         | 0         | 136.05    | 0          | 142.704    | 0          | NEDD8-conjugating enzyme UBC12, putative (UBC12)                         |
| PVX_101165 |         | 0         | 0         | 179.176   | 0         | 45.708    | 0         | 0         | 0         | 109.153   | 75.8984    | 86.0054    | 0          | 50S ribosomal protein L3, putative                                       |
| PVX_101170 |         | 85.4959   | 0         | 425.613   | 273.53    | 27.1423   | 0         | 0         | 0         | 162.005   | 90.1039    | 51.0557    | 0          | hypothetical protein, conserved                                          |
| PVX_101175 |         | 0         | 0         | 0         | 0         | 0         | 0         | 0         | 0         | 0         | 7.37074    | 4.17478    | 0          | kinesin motor domain containing protein                                  |
| PVX_101180 |         | 87.4166   | 0         | 217.599   | 0         | 27.7534   | 0         | 0         | 0         | 0         | 0          | 0          | 0          | ENTH domain containing protein                                           |
| PVX_101185 |         | 123.141   | 0         | 0         | 0         | 39.1295   | 0         | 0         | 0         | 46.6795   | 0          | 0          | 0          | hypothetical protein, conserved                                          |
| PVX_101190 |         | 66.6987   | 93.1482   | 165.931   | 213.279   | 0         | 0         | 0         | 0         | 0         | 23.4334    | 39.8295    | 0          | hypothetical protein, conserved                                          |
| PVX_101195 |         | 0         | 0         | 0         | 0         | 0         | 0         | 0         | 0         | 70.5463   | 0          | 0          | 0          | 5-aminolevulinic acid synthase, putative (ALAS)                          |
| PVX_101200 |         | 289.386   | 0         | 720.53    | 0         | 61.2639   | 0         | 147.723   | 268.047   | 36.5596   | 67.7704    | 268.824    | 0          | actin                                                                    |
| PVX_101205 |         | 0         | 0         | 0         | 0         | 0         | 0         | 0         | 0         | 0         | 0          | 7.86304    | 0          | hypothetical protein                                                     |
| PVX_101210 |         | 0         | 0         | 0         | 0         | 10.6603   | 0         | 0         | 0         | 0         | 0          | 0          | 0          | hypothetical protein, conserved                                          |
| PVX_101215 |         | 0         | 0         | 227.164   | 0         | 0         | 0         | 0         | 0         | 0         | 0          | 54.4919    | 0          | myosin A tail domain interacting protein MTIP, putative                  |
| PVX_101220 |         | 0         | 0         | 0         | 0         | 0         | 0         | 0         | 0         | 82.0632   | 0          | 100.582    | 0          | hypothetical protein, conserved                                          |
| PVX_101225 |         | 0         | 47.208    | 0         | 0         | 0         | 0         | 103.437   | 0         | 51.2356   | 118.76     | 26.9141    | 0          | pre-mRNA-splicing factor, putative                                       |
| PVX_101230 |         | 0         | 0         | 0         | 0         | 0         | 0         | 0         | 142.805   | 38.9545   | 0          | 40.9177    | 0          | hypothetical protein, conserved                                          |
| PVX_101235 |         | 121.634   | 0         | 0         | 0         | 38.6494   | 0         | 0         | 0         | 0         | 128.167    | 48.4267    | 0          | hypothetical protein, conserved                                          |
| PVX_101240 |         | 0         | 0         | 0         | 0         | 13.7459   | 0         | 0         | 0         | 0         | 15.2297    | 25.8819    | 0          | rac-beta serine/threonine protein kinase, putative                       |
| PVX_101245 |         | 0         | 70.5823   | 0         | 0         | 0         | 0         | 0         | 0         | 0         | 0          | 40.2247    | 0          | hypothetical protein, conserved                                          |
| PVX_101250 |         | 0         | 0         | 0         | 0         | 39.4169   | 0         | 0         | 0         | 23.5366   | 43.6474    | 49.4566    | 0          | hypothetical protein, conserved                                          |
| PVX_101255 |         | 48.8025   | 0         | 0         | 0         | 0         | 0         | 0         | 0         | 18.5152   | 17.1306    | 9.71651    | 0          | hypothetical protein, conserved                                          |
| PVX_101257 |         | 0         | 44.1066   | 0         | 0         | 0         | 0         | 0         | 0         | 0         | 22.1933    | 37.7209    | 0          | hypothetical protein, conserved                                          |
| PVX_101260 |         | 137.391   | 383.757   | 0         | 219.676   | 21.7997   | 351.707   | 210.215   | 190.837   | 208.247   | 217.212    | 259.806    | 222.569    | 70 kDa peptidylprolyl isomerase, putative                                |
| PVX_101265 |         | 44.9771   | 0         | 0         | 143.733   | 14.2646   | 0         | 0         | 62.4591   | 0         | 31.6072    | 35.8101    | 0          | cyclin g-associated kinase, putative                                     |
| PVX_101269 |         | 0         | 0         | 0         | 24.9014   | 0         | 0         | 0         | 29.7296   | 27.5607   | 15.6161    | 127.123    | 0          | hypothetical protein, conserved                                          |
| PVX_101271 |         | 0         | 0         | 0         | 0         | 0         | 0         | 0         | 0         | 0         | 0          | 0          | 0          | hypothetical protein, conserved                                          |
| PVX_101275 |         | 0         | 0         | 0         | 0         | 0         | 0         | 0         | 0         | 0         | 0          | 0          | 0          | hypothetical protein                                                     |
| PVX_101280 |         | 0         | 0         | 0         | 0         | 0         | 0         | 0         | 0         | 0         | 0          | 0          | 0          | dipeptidyl aminopeptidase 2, putative (DPAP2)                            |
| PVX_101285 |         | 0         | 0         | 0         | 0         | 0         | 0         | 243.568   | 0         | 30.1527   | 0          | 79.1911    | 128.935    | U3 small nucleolar RNA-associated protein 11, putative                   |
| PVX_101290 |         | 0         | 0         | 0         | 0         | 159.474   | 0         | 0         | 0         | 0         | 0          | 0          | 407.316    | rRNA intron endonuclease, catalytic C-terminal domain containing protein |
| PVX_101295 |         | 100.02    | 139.743   | 0         | 0         | 0         | 0         | 0         | 0         | 0         | 35.1343    | 79.6401    | 162.172    | methyltransferase, putative                                              |
| PVX_101300 |         | 0         | 64.4612   | 0         | 0         | 0         | 0         | 0         | 0         | 0         | 64.8366    | 18.37      | 0          | RNA-binding protein, putative                                            |
| PVX_101305 |         | 0         | 0         | 0         | 0         | 0         | 541.07    | 0         | 0         | 80.0243   | 0          | 21.014     | 0          | hypothetical protein, conserved                                          |
| PVX_101310 |         | 0         | 0         | 0         | 0         | 0         | 0         | 0         | 0         | 0         | 0          | 0          | 0          | hypothetical protein, conserved                                          |
| PVX_101315 |         | 606.584   | 665.77    | 0         | 0         | 192.577   | 443.895   | 132.663   | 120.386   | 328.404   | 578.39     | 362.235    | 140.449    | bax inhibitor 1, putative                                                |
| PVX_101320 |         | 44.1778   | 30.8394   | 0         | 141.176   | 14.0109   | 0         | 270.166   | 0         | 16.7376   | 0          | 123.108    | 71.5172    | hypothetical protein, conserved                                          |
| PVX_101325 |         | 0         | 0         | 0         | 0         | 0         | 0         | 0         | 18.3549   | 0         | 4.6464     | 5.26318    | 0          | hypothetical protein, conserved                                          |
| PVX_101330 |         | 0         | 0         | 0         | 0         | 0         | 0         | 0         | 0         | 0         | 0          | 0          | 0          | hypothetical protein, conserved                                          |
| PVX_101335 |         | 167.003   | 116.64    | 0         | 534.27    | 132.539   | 0         | 127.822   | 232.003   | 316.447   | 117.337    | 465.403    | 270.652    | 26S protease regulatory subunit 8, putative (RPT6)                       |
| PVX_101340 |         | 0         | 0         | 0         | 0         | 0         | 0         | 0         | 73.9479   | 20.1745   | 56.1248    | 31.7956    | 0          | hypothetical protein, conserved                                          |
| PVX_101345 |         | 179.03    | 0         | 0         | 0         | 28.4211   | 0         | 137.054   | 124.363   | 135.7     | 188.676    | 0          | 0          | hypothetical protein, conserved                                          |
| PVX_101350 |         | 0         | 0         | 0         | 0         | 0         | 0         | 0         | 0         | 0         | 0          | 0          | 0          | hypothetical protein, conserved                                          |
| PVX_101355 |         | 0         | 0         | 71.3338   | 0         | 0         | 0         | 39.8551   | 10.8741   | 40.3469   | 34.2803    | 46.448     | 0          | protein phosphatase 2C domain containing protein                         |
| PVX_101360 |         | 0         | 0         | 944.642   | 0         | 0         | 0         | 524.415   | 0         | 0         | 0          | 74.955     | 0          | hypothetical protein, conserved                                          |
| PVX_101362 |         | 0         | 0         | 0         | 0         | 91.2908   | 0         | 796.611   | 108.591   | 0         | 56.9739    | 0          | 0          | cutA, putative                                                           |
| PVX_101365 |         | 0         | 0         | 0         | 0         | 0         | 0         | 0         | 0         | 0         | 0          | 9.36188    | 0          | hypothetical protein, conserved                                          |
| PVX_101370 |         | 0         | 0         | 0         | 0         | 0         | 0         | 0         | 0         | 0         | 0          | 0          | 0          | hypothetical protein, conserved                                          |
| PVX_101375 |         | 0         | 0         | 0         | 0         | 0         | 0         | 0         | 0         | 0         | 0          | 0          | 0          | hypothetical protein                                                     |
| PVX_101380 |         | 0         | 480.154   | 0         | 0         | 0         | 0         | 0         | 0         | 0         | 238.959    | 0          | 0          | unspecified product                                                      |
| PVX_101385 |         | 0         | 26.1917   | 0         | 39.9473   | 3.96499   | 127.9     | 19.1094   | 0         | 9.47856   | 8.79395    | 9.96124    | 0          | THO complex subunit 2, putative (THO2)                                   |
| PVX_101390 |         | 0         | 45.755    | 0         | 0         | 0         | 0         | 0         | 91.0143   | 24.8296   | 23.0217    | 26.0864    | 0          | dimethyladenosine transferase, putative                                  |
| PVX_101395 |         | 143.936   | 100.607   | 0         | 461.26    | 45.7608   | 738.592   | 220.76    | 200.077   | 163.711   | 202.199    | 85.9612    | 0          | hypothetical protein, conserved                                          |
| PVX_101400 |         | 0         | 0         | 0         | 0         | 0         | 0         | 0         | 0         | 0         | 0          | 4.72497    | 19.1976    | hypothetical protein, conserved                                          |
| PVX_101405 |         | 32.0678   | 44.7644   | 0         | 0         | 0         | 0         | 0         | 44.5265   | 48.5939   | 22.5368    | 19.1486    | 0          | hypothetical protein, conserved                                          |
| PVX_101410 |         | 0         | 90.5408   | 0         | 0         | 0         | 0         | 0         | 0         | 0         | 0          | 51.582     | 210.24     | vacuolar protein sorting-associated protein 26, putative (VPS26)         |
| PVX_101415 |         | 0         | 0         | 0         | 0         | 0         | 0         | 0         | 0         | 0         | 0          | 16.5262    | 0          | hypothetical protein, conserved                                          |
| PVX_101420 |         | 392.654   | 0         | 0         | 419.28    | 124.794   | 0         | 200.658   | 0         | 99.2354   | 45.9692    | 78.1653    | 0          | AP-3 complex subunit sigma, putative                                     |
| PVX_101425 |         | 0         | 152.708   | 0         | 233.123   | 0         | 0         | 0         | 0         | 82.8657   | 25.6084    | 58.0375    | 118.096    | eukaryotic translation initiation factor 2b, subunit 2, putative         |
| PVX_101430 |         | 0         | 0         | 0         | 0         | 87.0847   | 0         | 0         | 0         | 103.612   | 0          | 54.3655    | 0          | hypothetical protein, conserved                                          |
| PVX_101435 |         | 19.5967   | 27.3513   | 48.6876   | 0         | 0         | 0         | 27.2069   | 0         | 0         | 34.4329    | 15.6021    | 0          | DNA repair protein rhp16, putative                                       |
| PVX_101440 |         | 0         | 0         | 0         | 0         | 0         | 0         | 0         | 0         | 12.8777   | 23.8891    | 27.0638    | 0          | hypothetical protein, conserved                                          |
| PVX_101442 |         | 0         | 0         | 0         | 0         | 0         | 0         | 0         | 0         | 0         | 0          | 0          | 0          | conserved Plasmodium protein, unknown function                           |
| PVX_101445 |         | 0         | 0         | 0         | 0         | 21.437    | 0         | 0         | 0         | 25.5984   | 47.468     | 67.2345    | 0          | hypothetical protein, conserved                                          |

| Gene ID    | Patient 1 | Patient 2 | Patient 3 | Patient 4 | Patient 5 | Patient 6 | Patient 7 | Patient 8 | Patient 9 | Patient 10 | Patient 11 | Patient 12 | Gene Description                                               |
|------------|-----------|-----------|-----------|-----------|-----------|-----------|-----------|-----------|-----------|------------|------------|------------|----------------------------------------------------------------|
| PVX_101450 | 0         | 0         | 0         | 0         | 0         | 0         | 0         | 0         | 0         | 0          | 0          | 0          | coronin, putative                                              |
| PVX_101455 | 0         | 0         | 0         | 394.387   | 78.2589   | 0         | 188.739   | 0         | 0         | 43.2511    | 147.079    | 199.79     | thymidylate kinase, putative                                   |
| PVX_101460 | 0         | 0         | 0         | 0         | 0         | 0         | 0         | 0         | 0         | 0          | 15.177     | 0          | hypothetical protein, conserved                                |
| PVX_101465 | 44.5073   | 62.1391   | 0         | 0         | 0         | 0         | 0         | 0         | 0         | 31.2772    | 26.5771    | 0          | DEAD/DEAH box ATP-dependent RNA helicase, putative             |
| PVX_101470 | 36.9845   | 51.631    | 0         | 0         | 11.7275   | 0         | 0         | 0         | 14.0116   | 51.9831    | 51.5308    | 0          | hypothetical protein                                           |
| PVX_101475 | 47.992    | 0         | 119.33    | 0         | 30.4439   | 0         | 0         | 66.6479   | 18.1832   | 0          | 19.1053    | 0          | tryptophan--tRNA ligase, putative                              |
| PVX_101480 | 0         | 0         | 0         | 0         | 14.1578   | 228.386   | 0         | 0         | 16.913    | 15.6854    | 44.4277    | 0          | hypothetical protein, conserved                                |
| PVX_101482 | 0         | 0         | 0         | 0         | 0         | 0         | 0         | 0         | 0         | 0          | 0          | 0          | tRNA Valine                                                    |
| PVX_101484 | 0         | 0         | 0         | 0         | 0         | 0         | 0         | 0         | 0         | 0          | 0          | 0          | tRNA Glutamic acid                                             |
| PVX_101485 | 0         | 0         | 0         | 0         | 4.31236   | 0         | 0         | 0         | 0         | 4.78204    | 0          | 0          | rhostry neck protein 3, putative (RON3)                        |
| PVX_101490 | 0         | 991.957   | 505.919   | 650.281   | 0         | 1041.38   | 0         | 0         | 230.51    | 284.504    | 0          | 0          | hypothetical protein, conserved                                |
| PVX_101495 | 0         | 0         | 0         | 0         | 0         | 0         | 16.6808   | 0         | 0         | 0          | 2.17392    | 0          | reticulocyte binding protein 3, pseudogene (RBP3)              |
| PVX_101500 | 29.4459   | 75.3365   | 0         | 0         | 9.33082   | 0         | 14.9898   | 13.6257   | 29.7427   | 58.64      | 29.3041    | 15.8742    | hypothetical protein                                           |
| PVX_101503 | 0         | 0         | 0         | 0         | 0         | 0         | 164.237   | 0         | 0         | 0          | 0          | 0          | VIR protein,PIR protein                                        |
| PVX_101505 | 0         | 0         | 0         | 0         | 0         | 0         | 0         | 0         | 0         | 0          | 0          | 0          | Pv-fam-d protein                                               |
| PVX_101510 | 46.0178   | 64.2492   | 0         | 0         | 14.5951   | 0         | 0         | 63.905    | 87.1747   | 32.3384    | 0          | 0          | tryptophan-rich antigen (Pv-fam-a)                             |
| PVX_101515 | 0         | 209.146   | 497.005   | 0         | 126.774   | 0         | 152.846   | 138.661   | 226.946   | 245.392    | 397.312    | 323.618    | tryptophan-rich antigen (Pv-fam-a)                             |
| PVX_101520 | 244.224   | 1577.34   | 0         | 585.615   | 77.4871   | 937.572   | 186.793   | 508.807   | 508.969   | 429.032    | 352.444    | 197.775    | Pv-fam-d protein                                               |
| PVX_101525 | 0         | 94.6588   | 0         | 0         | 0         | 0         | 0         | 0         | 0         | 47.5683    | 0          | 219.822    | tryptophan-rich antigen (Pv-fam-a)                             |
| PVX_101530 | 72.2445   | 554.953   | 0         | 0         | 0         | 0         | 0         | 100.352   | 27.3765   | 25.3811    | 14.3805    | 234.091    | Plasmodium exported protein, unknown function                  |
| PVX_101535 | 0         | 58.8142   | 0         | 0         | 0         | 0         | 0         | 0         | 0         | 29.5826    | 0          | 0          | Phist protein (Pf-fam-b)                                       |
| PVX_101540 | 0         | 121.049   | 0         | 0         | 0         | 0         | 0         | 0         | 0         | 60.8832    | 0          | 0          | Pv-fam-d protein                                               |
| PVX_101545 | 0         | 0         | 0         | 0         | 0         | 0         | 0         | 0         | 0         | 42.7223    | 0          | 0          | Plasmodium exported protein, unknown function                  |
| PVX_101550 | 285.121   | 0         | 0         | 0         | 0         | 0         | 0         | 0         | 0         | 0          | 0          | 0          | Plasmodium exported protein, unknown function                  |
| PVX_101555 | 31.5034   | 0         | 0         | 0         | 19.9762   | 161.112   | 0         | 0         | 23.8692   | 33.2103    | 12.541     | 0          | hypothetical protein                                           |
| PVX_101560 | 0         | 215.747   | 0         | 0         | 24.5138   | 0         | 0         | 0         | 29.2675   | 0          | 0          | 0          | variable surface protein Vir4-related,PIR protein              |
| PVX_101562 | 0         | 0         | 0         | 0         | 0         | 0         | 0         | 0         | 0         | 0          | 0          | 0          | VIR protein, pseudogene,PIR protein, pseudogene                |
| PVX_101565 | 0         | 0         | 0         | 0         | 0         | 0         | 0         | 0         | 0         | 0          | 0          | 0          | variable surface protein Vir24-related,PIR protein             |
| PVX_101570 | 0         | 0         | 0         | 0         | 0         | 0         | 0         | 0         | 0         | 0          | 0          | 0          | variable surface protein Vir5-related,PIR protein              |
| PVX_101575 | 0         | 104.358   | 0         | 0         | 23.7142   | 0         | 0         | 0         | 28.3141   | 0          | 14.8728    | 0          | hypothetical protein, conserved                                |
| PVX_101580 | 106.065   | 148.201   | 0         | 339.536   | 33.6894   | 543.643   | 0         | 0         | 120.606   | 0          | 63.3409    | 0          | Pv-fam-d protein                                               |
| PVX_101585 | 0         | 0         | 0         | 0         | 0         | 0         | 0         | 0         | 0         | 0          | 0          | 0          | reticulocyte binding protein 2 precursor, pseudogene, putative |
| PVX_101590 | 0         | 0         | 0         | 0         | 0         | 0         | 0         | 0         | 0         | 0          | 0          | 0          | reticulocyte-binding protein 2 (RBP2), like                    |
| PVX_101592 | 0         | 631.518   | 0         | 0         | 95.9238   | 0         | 0         | 0         | 228.146   | 210.944    | 0          | 0          | Plasmodium exported protein, unknown function                  |
| PVX_101595 | 0         | 1690.85   | 317.349   | 0         | 80.9399   | 2612.54   | 0         | 0         | 0         | 178.909    | 0          | 0          | Plasmodium exported protein, unknown function                  |
| PVX_101600 | 0         | 0         | 0         | 0         | 0         | 0         | 0         | 0         | 35.8634   | 33.2406    | 18.8362    | 0          | variable surface protein Vir16/32-related,PIR protein          |
| PVX_101605 | 0         | 0         | 242.801   | 0         | 0         | 0         | 0         | 0         | 0         | 0          | 0          | 0          | Plasmodium exported protein, unknown function                  |
| PVX_101610 | 325.799   | 113.77    | 202.712   | 521.111   | 0         | 0         | 124.673   | 113.149   | 123.467   | 257.524    | 178.343    | 131.993    | RAD protein (Pv-fam-e)                                         |
| PVX_101615 | 0         | 0         | 0         | 0         | 0         | 0         | 0         | 0         | 0         | 0          | 0          | 0          | variable surface protein Vir14-related,PIR protein             |
| PVX_101617 | 0         | 0         | 0         | 0         | 0         | 0         | 0         | 0         | 28.3852   | 0          | 0          | 0          | VIR protein,PIR protein                                        |
| PVX_101620 | 0         | 39.2786   | 0         | 0         | 8.92374   | 0         | 0         | 0         | 28.4218   | 0          | 0          | 0          | variable surface protein Vir16-related,PIR protein             |
| PVX_101625 | 0         | 0         | 0         | 0         | 0         | 0         | 0         | 0         | 0         | 0          | 0          | 0          | variable surface protein Vir18-like,PIR protein                |
| PVX_101630 | 0         | 0         | 0         | 0         | 0         | 0         | 0         | 0         | 0         | 0          | 0          | 0          | VIR protein,PIR protein                                        |
| PVX_102125 | 0         | 0         | 0         | 0         | 0         | 0         | 0         | 0         | 0         | 0          | 0          | 0          | variable surface protein Vir32, truncated, putative            |
| PVX_102130 | 0         | 0         | 0         | 0         | 0         | 0         | 0         | 0         | 0         | 0          | 0          | 0          | hypothetical protein                                           |
| PVX_102630 | 0         | 0         | 0         | 0         | 0         | 0         | 0         | 0         | 0         | 0          | 0          | 0          | variable surface protein Vir27, putative                       |
| PVX_102635 | 0         | 159.033   | 0         | 0         | 0         | 0         | 0         | 0         | 0         | 0          | 0          | 0          | variable surface protein Vir10-related                         |
| PVX_102640 | 0         | 0         | 0         | 0         | 0         | 0         | 0         | 0         | 0         | 0          | 0          | 0          | variable surface protein Vir12-related                         |
| PVX_102645 | 0         | 0         | 0         | 0         | 0         | 0         | 0         | 0         | 0         | 0          | 0          | 0          | hypothetical protein                                           |
| PVX_103145 | 0         | 0         | 0         | 0         | 0         | 0         | 0         | 0         | 0         | 0          | 0          | 0          | variable surface protein Vir10, putative,PIR protein           |
| PVX_103150 | 0         | 0         | 0         | 0         | 22.4736   | 0         | 0         | 0         | 0         | 24.8792    | 28.192     | 0          | variable surface protein Vir18, putative,PIR protein           |
| PVX_103155 | 0         | 83.2792   | 0         | 0         | 0         | 0         | 0         | 0         | 15.063    | 0          | 0          | 0          | variable surface protein Vir12-related,PIR protein             |
| PVX_103160 | 0         | 0         | 0         | 0         | 0         | 0         | 0         | 0         | 0         | 0          | 0          | 0          | variable surface protein Vir10-like,PIR protein                |
| PVX_103660 | 101.725   | 213.193   | 0         | 0         | 32.3074   | 0         | 0         | 282.686   | 0         | 107.199    | 60.7486    | 0          | variable surface protein Vir16/32-related                      |
| PVX_103665 | 0         | 0         | 0         | 0         | 0         | 0         | 0         | 0         | 0         | 0          | 0          | 0          | variable surface protein Vir4/32-like                          |
| PVX_103670 | 0         | 0         | 0         | 0         | 0         | 0         | 0         | 0         | 0         | 0          | 0          | 0          | variable surface protein Vir6-like                             |
| PVX_103675 | 0         | 0         | 0         | 0         | 0         | 0         | 0         | 0         | 0         | 0          | 0          | 0          | variable surface protein Vir23, pseudogene,putative            |
| PVX_103680 | 0         | 0         | 0         | 0         | 0         | 0         | 0         | 0         | 0         | 0          | 0          | 0          | variable surface protein Vir21, putative                       |
| PVX_104180 | 0         | 0         | 0         | 0         | 0         | 0         | 0         | 0         | 24.6133   | 0          | 0          | 0          | variable surface protein Vir12, putative                       |
| PVX_104185 | 0         | 0         | 0         | 0         | 0         | 0         | 0         | 0         | 0         | 0          | 0          | 0          | variable surface protein Vir16-related                         |
| PVX_104190 | 0         | 0         | 0         | 0         | 0         | 0         | 0         | 0         | 0         | 0          | 0          | 0          | variable surface protein Vir12-like                            |
| PVX_104690 | 0         | 0         | 0         | 0         | 0         | 0         | 0         | 0         | 0         | 0          | 0          | 0          | Pv-fam-c protein                                               |

| Gene ID     | Patient 1 | Patient 2 | Patient 3 | Patient 4 | Patient 5 | Patient 6 | Patient 7 | Patient 8 | Patient 9 | Patient 10 | Patient 11 | Patient 12 | Gene Description                                       |
|-------------|-----------|-----------|-----------|-----------|-----------|-----------|-----------|-----------|-----------|------------|------------|------------|--------------------------------------------------------|
| PVX_104695  | 0         | 0         | 0         | 0         | 0         | 0         | 0         | 0         | 0         | 0          | 0          | 0          | variable surface protein Vir6-like                     |
| PVX_104700  | 0         | 0         | 0         | 0         | 0         | 0         | 0         | 0         | 0         | 0          | 14.5449    | 0          | variable surface protein Vir18, putative               |
| PVX_105200  | 0         | 0         | 0         | 0         | 0         | 0         | 0         | 0         | 0         | 0          | 21.8117    | 0          | Pv-fam-c protein                                       |
| PVX_105205  | 0         | 0         | 0         | 0         | 0         | 0         | 0         | 0         | 0         | 0          | 0          | 0          | VIR protein,PIR protein                                |
| PVX_105700  | 0         | 0         | 0         | 0         | 0         | 0         | 0         | 0         | 0         | 0          | 0          | 0          | variable surface protein Vir32/4, putative             |
| PVX_105705  | 0         | 0         | 0         | 0         | 0         | 0         | 0         | 0         | 0         | 0          | 0          | 0          | hypothetical protein                                   |
| PVX_105710  | 0         | 0         | 0         | 0         | 0         | 0         | 0         | 0         | 0         | 0          | 0          | 0          | variable surface protein Vir1/9, putative              |
| PVX_106210  | 0         | 0         | 0         | 0         | 0         | 0         | 0         | 0         | 0         | 0          | 0          | 0          | variable surface protein Vir6, putative,PIR protein    |
| PVX_106215  | 0         | 0         | 0         | 0         | 0         | 0         | 0         | 0         | 0         | 0          | 0          | 0          | VIR protein, pseudogene,PIR protein, pseudogene        |
| PVX_106220  | 0         | 0         | 0         | 0         | 0         | 0         | 0         | 0         | 0         | 0          | 0          | 0          | variable surface protein Vir12, putative,PIR protein   |
| PVX_106720  | 0         | 0         | 0         | 0         | 0         | 0         | 0         | 0         | 0         | 0          | 0          | 0          | variable surface protein Vir33 (truncated), putative   |
| PVX_106725  | 0         | 0         | 0         | 0         | 0         | 0         | 0         | 0         | 0         | 0          | 0          | 0          | variable surface protein Vir12, putative               |
| PVX_106730  | 0         | 0         | 0         | 0         | 0         | 0         | 0         | 0         | 0         | 0          | 0          | 0          | hypothetical protein                                   |
| PVX_107230  | 0         | 0         | 0         | 0         | 0         | 0         | 0         | 0         | 0         | 0          | 0          | 0          | hypothetical protein                                   |
| PVX_107235  | 0         | 0         | 0         | 0         | 0         | 0         | 0         | 0         | 0         | 0          | 0          | 0          | variable surface protein Vir12-related                 |
| PVX_107735  | 0         | 109.674   | 0         | 0         | 0         | 0         | 0         | 0         | 59.5114   | 0          | 31.2595    | 0          | hypothetical protein                                   |
| PVX_107740  | 0         | 87.8651   | 0         | 0         | 0         | 0         | 0         | 0         | 95.3282   | 44.162     | 0          | 0          | hypothetical protein                                   |
| PVX_107745  | 0         | 0         | 0         | 0         | 33.333    | 0         | 0         | 0         | 39.7774   | 36.8638    | 41.7815    | 0          | variable surface protein Vir 12-like                   |
| PVX_107750  | 0         | 0         | 0         | 0         | 0         | 0         | 0         | 0         | 0         | 0          | 0          | 0          | variable surface protein Vir2/15-like                  |
| PVX_107755  | 0         | 0         | 0         | 0         | 0         | 0         | 0         | 0         | 0         | 0          | 0          | 0          | variable surface protein Vir12/24-related              |
| PVX_108255  | 0         | 0         | 0         | 0         | 0         | 0         | 0         | 0         | 0         | 0          | 0          | 0          | hypothetical protein                                   |
| PVX_108260  | 0         | 0         | 0         | 0         | 0         | 0         | 0         | 0         | 0         | 0          | 0          | 0          | Pv-fam-c protein                                       |
| PVX_108760  | 0         | 0         | 0         | 0         | 0         | 0         | 0         | 0         | 0         | 0          | 0          | 0          | variable surface protein Vir35, putative               |
| PVX_108765  | 0         | 0         | 0         | 0         | 0         | 0         | 0         | 0         | 0         | 0          | 0          | 0          | hypothetical protein                                   |
| PVX_108770  | 0         | 0         | 0         | 0         | 21.5675   | 0         | 0         | 0         | 0         | 23.8782    | 40.5858    | 0          | variable surface protein Vir 14, putative              |
| PVX_108775  | 0         | 0         | 0         | 0         | 0         | 0         | 0         | 0         | 0         | 0          | 0          | 0          | variable surface protein Vir26, truncated, putative    |
| PVX_109275  | 0         | 0         | 0         | 0         | 0         | 0         | 0         | 0         | 0         | 45.307     | 0          | 0          | Pv-fam-d protein                                       |
| PVX_109280  | 0         | 96.4128   | 0         | 441.988   | 0         | 0         | 0         | 0         | 52.2971   | 96.895     | 82.383     | 0          | tryptophan-rich antigen (Pv-fam-a)                     |
| PVX_109778  | 0         | 0         | 0         | 0         | 0         | 0         | 0         | 0         | 0         | 0          | 0          | 0          | variable surface protein Vir, putative                 |
| PVX_109780  | 0         | 0         | 0         | 0         | 0         | 0         | 0         | 0         | 0         | 0          | 0          | 0          | variable surface protein Vir35, putative               |
| PVX_109785  | 0         | 0         | 0         | 0         | 0         | 0         | 0         | 0         | 0         | 0          | 0          | 0          | variable surface protein Vir35, putative               |
| PVX_109790  | 0         | 0         | 0         | 0         | 0         | 0         | 0         | 0         | 0         | 51.2918    | 0          | 0          | variable surface protein Vir34, putative               |
| PVX_109795  | 0         | 0         | 0         | 0         | 0         | 0         | 0         | 0         | 0         | 0          | 0          | 0          | variable surface protein Vir33, putative               |
| PVX_110295  | 0         | 0         | 0         | 0         | 0         | 0         | 0         | 0         | 0         | 0          | 0          | 0          | variable surface protein Vir22-like,PIR protein        |
| PVX_110300  | 0         | 0         | 0         | 0         | 0         | 0         | 0         | 0         | 0         | 0          | 0          | 0          | variable surface protein Vir21, putative,PIR protein   |
| PVX_110805  | 0         | 0         | 0         | 0         | 0         | 0         | 0         | 0         | 0         | 0          | 0          | 0          | ring-exported protein 4, putative                      |
| PVX_110810  | 0         | 0         | 0         | 0         | 0         | 0         | 0         | 0         | 0         | 0          | 0          | 0          | Duffy receptor precursor (DBP)                         |
| PVX_110815  | 0         | 0         | 0         | 0         | 0         | 0         | 0         | 0         | 0         | 0          | 0          | 0          | hypothetical protein                                   |
| PVX_110820  | 0         | 0         | 0         | 0         | 0         | 0         | 0         | 0         | 0         | 0          | 0          | 0          | Phist protein (Pv-fam-b)                               |
| PVX_110822  | 0         | 57.1978   | 0         | 0         | 0         | 0         | 0         | 0         | 0         | 0          | 0          | 0          | VIR protein,PIR protein                                |
| PVX_110825  | 16.3078   | 125.18    | 0         | 0         | 31.0107   | 83.362    | 0         | 0         | 49.4188   | 45.8474    | 12.9836    | 0          | Pv-fam-d protein                                       |
| PVX_110830  | 0         | 436.164   | 0         | 0         | 0         | 0         | 0         | 0         | 59.1406   | 164.326    | 31.0514    | 0          | Plasmodium exported protein, unknown function          |
| PVX_110832  | 0         | 210.367   | 0         | 0         | 0         | 0         | 230.83    | 0         | 114.1     | 264.215    | 29.9548    | 0          | Plasmodium exported protein, unknown function          |
| PVX_110834  | 0         | 0         | 0         | 0         | 0         | 0         | 0         | 0         | 49.3289   | 0          | 0          | 0          | Plasmodium exported protein, unknown function          |
| PVX_110835  | 544.319   | 189.931   | 364.107   | 334.289   | 172.531   | 0         | 223.884   | 465.052   | 325.15    | 308.992    | 566.708    | 203.214    | Plasmodium exported protein, unknown function          |
| PVX_110840  | 0         | 209.309   | 0         | 0         | 0         | 0         | 0         | 0         | 0         | 0          | 0          | 0          | Plasmodium exported protein, unknown function          |
| PVX_110845  | 0         | 0         | 0         | 0         | 0         | 0         | 0         | 575.392   | 0         | 144.795    | 164.431    | 0          | hypothetical protein                                   |
| PVX_110845a | 0         | 0         | 0         | 0         | 0         | 0         | 0         | 0         | 0         | 0          | 0          | 0          | conserved Plasmodium protein, unknown function         |
| PVX_110850  | 0         | 0         | 0         | 0         | 0         | 0         | 95.9515   | 0         | 59.4637   | 22.0626    | 18.7456    | 0          | GDP dissociation inhibitor, putative                   |
| PVX_110855  | 117.31    | 0         | 437.662   | 562.548   | 55.8267   | 0         | 244.394   | 22.2248   | 41.2165   | 116.753    | 94.9925    | 0          | hypothetical protein, conserved                        |
| PVX_110860  | 0         | 0         | 0         | 0         | 0         | 0         | 0         | 0         | 0         | 0          | 74.1191    | 0          | hypothetical protein                                   |
| PVX_110865  | 0         | 0         | 0         | 0         | 0         | 0         | 47.0031   | 0         | 0         | 0          | 0          | 0          | hypothetical protein, conserved                        |
| PVX_110870  | 0         | 0         | 0         | 0         | 175.789   | 0         | 0         | 383.548   | 104.571   | 483.576    | 164.604    | 0          | enhancer of rudimentary domain containing protein      |
| PVX_110880  | 0         | 24.989    | 0         | 0         | 0         | 0         | 0         | 0         | 0         | 75.4797    | 28.5038    | 0          | DNA repair helicase RAD25, putative                    |
| PVX_110885  | 0         | 0         | 0         | 0         | 0         | 0         | 0         | 0         | 0         | 0          | 8.69045    | 0          | dynamain protein, putative                             |
| PVX_110890  | 0         | 0         | 0         | 98.6217   | 0         | 0         | 0         | 0         | 0         | 0          | 0          | 0          | hypothetical protein, conserved                        |
| PVX_110895  | 63.673    | 0         | 0         | 0         | 0         | 0         | 97.6057   | 0         | 0         | 0          | 38.0258    | 103.319    | ADP/ATP transporter on adenylate translocase, putative |
| PVX_110900  | 0         | 0         | 0         | 0         | 0         | 0         | 0         | 0         | 0         | 0          | 9.24526    | 0          | hypothetical protein, conserved                        |
| PVX_110905  | 37.1688   | 0         | 0         | 118.754   | 11.786    | 0         | 56.8132   | 0         | 42.2443   | 39.1816    | 44.3894    | 0          | pyruvate kinase, putative                              |
| PVX_110910  | 32.9035   | 11.4804   | 40.8704   | 0         | 10.4282   | 0         | 25.1302   | 0         | 18.6956   | 11.563     | 3.27454    | 0          | DNA polymerase zeta catalytic subunit, putative        |
| PVX_110915  | 30.405    | 21.217    | 0         | 0         | 14.454    | 0         | 0         | 21.1054   | 34.5517   | 21.37      | 24.2071    | 0          | hypothetical protein, conserved                        |
| PVX_110920  | 0         | 0         | 0         | 0         | 0         | 0         | 0         | 0         | 0         | 0          | 35.8964    | 0          | acetyl-CoA transporter, putative                       |

| Gene ID    | Patient 1 | Patient 2 | Patient 3 | Patient 4 | Patient 5 | Patient 6 | Patient 7 | Patient 8 | Patient 9 | Patient 10 | Patient 11 | Patient 12 | Gene Description                                                                |
|------------|-----------|-----------|-----------|-----------|-----------|-----------|-----------|-----------|-----------|------------|------------|------------|---------------------------------------------------------------------------------|
| Patient    |           |           |           |           |           |           |           |           |           |            |            |            |                                                                                 |
| PVX_110925 | 156.798   | 109.615   | 782.135   | 502.658   | 49.8656   | 0         | 0         | 0         | 118.903   | 55.0632    | 124.858    | 0          | phosducin-like protein, putative (PHLP2)                                        |
| PVX_110930 | 0         | 0         | 0         | 403.867   | 40.0636   | 0         | 0         | 0         | 95.5971   | 0          | 125.502    | 0          | hypothetical protein, conserved                                                 |
| PVX_110935 | 0         | 0         | 0         | 0         | 0         | 0         | 0         | 0         | 0         | 0          | 0          | 0          | hypothetical protein                                                            |
| PVX_110940 | 131.559   | 30.6125   | 218.053   | 0         | 83.4466   | 0         | 67.0445   | 121.795   | 249.218   | 123.27     | 253.135    | 70.9909    | hypothetical protein, conserved                                                 |
| PVX_110945 | 0         | 0         | 0         | 0         | 0         | 0         | 0         | 0         | 0         | 0          | 0          | 0          | hypothetical protein                                                            |
| PVX_110950 | 0         | 0         | 0         | 0         | 0         | 0         | 0         | 0         | 0         | 0          | 0          | 0          | hypothetical protein, conserved                                                 |
| PVX_110955 | 0         | 0         | 0         | 0         | 0         | 0         | 0         | 0         | 0         | 0          | 0          | 0          | hypothetical protein, conserved                                                 |
| PVX_110960 | 49.4505   | 0         | 0         | 0         | 0         | 0         | 0         | 0         | 0         | 17.3751    | 9.84301    | 0          | hypothetical protein                                                            |
| PVX_110965 | 0         | 0         | 0         | 0         | 0         | 0         | 0         | 0         | 0         | 0          | 0          | 0          | hypothetical protein                                                            |
| PVX_110970 | 0         | 0         | 0         | 0         | 0         | 0         | 0         | 0         | 0         | 0          | 0          | 0          | hypothetical protein                                                            |
| PVX_110975 | 0         | 16.7008   | 59.4615   | 0         | 15.1713   | 0         | 0         | 0         | 9.06518   | 16.8186    | 19.0524    | 0          | hypothetical protein, conserved                                                 |
| PVX_110980 | 254.889   | 101.665   | 0         | 349.007   | 23.0919   | 0         | 55.656    | 101.123   | 206.923   | 127.949    | 144.954    | 58.9338    | methionine-tRNA ligase, putative                                                |
| PVX_110985 | 0         | 0         | 0         | 0         | 35.5926   | 0         | 0         | 0         | 169.874   | 0          | 66.9099    | 0          | hypothetical protein, conserved                                                 |
| PVX_110990 | 0         | 0         | 0         | 0         | 0         | 0         | 0         | 0         | 0         | 0          | 0          | 0          | ADP-ribosylation factor-like protein, putative                                  |
| PVX_110995 | 0         | 0         | 232.148   | 0         | 0         | 0         | 0         | 0         | 35.3399   | 0          | 18.5614    | 151.16     | hypothetical protein, conserved                                                 |
| PVX_111000 | 67.7338   | 0         | 0         | 0         | 7.15674   | 0         | 0         | 31.3468   | 17.1056   | 47.6047    | 26.9635    | 0          | hypothetical protein, conserved                                                 |
| PVX_111005 | 40.3531   | 0         | 0         | 0         | 25.5934   | 0         | 0         | 0         | 15.2881   | 28.3585    | 48.1926    | 65.3187    | flavoprotein subunit of succinate dehydrogenase, putative                       |
| PVX_111010 | 0         | 0         | 0         | 0         | 0         | 0         | 0         | 0         | 0         | 21.4224    | 0          | 0          | thioredoxin-like associated protein 2, putative (TLAP2)                         |
| PVX_111015 | 0         | 0         | 0         | 0         | 0         | 0         | 320.044   | 0         | 0         | 0          | 0          | 0          | 50S ribosomal protein L27, putative                                             |
| PVX_111020 | 0         | 0         | 0         | 0         | 0         | 0         | 0         | 0         | 0         | 76.3026    | 0          | 0          | hypothetical protein                                                            |
| PVX_111025 | 0         | 0         | 125.674   | 0         | 0         | 0         | 0         | 0         | 19.1487   | 71.0306    | 40.2392    | 81.8308    | vesicle transport-related protein, putative                                     |
| PVX_111030 | 212.696   | 0         | 531.321   | 0         | 0         | 0         | 0         | 591.71    | 0         | 373.361    | 127.037    | 0          | ubiquitin-conjugating enzyme, putative                                          |
| PVX_111035 | 0         | 0         | 0         | 0         | 0         | 0         | 0         | 0         | 0         | 0          | 0          | 0          | aspartyl protease, putative                                                     |
| PVX_111040 | 221.929   | 154.982   | 0         | 0         | 70.4356   | 378.805   | 0         | 0         | 56.0662   | 77.968     | 44.1759    | 0          | hypothetical protein, conserved                                                 |
| PVX_111045 | 81.8099   | 38.0646   | 67.7663   | 87.1032   | 17.29     | 0         | 41.6695   | 75.7258   | 51.6527   | 67.079     | 70.5622    | 0          | DNA binding protein Myb2, putative                                              |
| PVX_111050 | 46.6657   | 65.1543   | 116.028   | 0         | 44.4024   | 0         | 0         | 64.8051   | 88.4024   | 114.778    | 120.753    | 0          | WD domain, G-beta repeat domain containing protein                              |
| PVX_111055 | 132.434   | 185.108   | 330.076   | 0         | 84.1844   | 0         | 609.132   | 368.135   | 502.057   | 418.618    | 184.545    | 429.849    | haloacid dehalogenase-like hydrolase, putative (HAD1)                           |
| PVX_111060 | 0         | 0         | 0         | 0         | 54.8853   | 0         | 0         | 0         | 130.836   | 0          | 0          | 0          | hypothetical protein, conserved                                                 |
| PVX_111065 | 0         | 0         | 0         | 0         | 0         | 0         | 0         | 0         | 0         | 0          | 13.3945    | 0          | early transcribed membrane protein (ETRAMP)                                     |
| PVX_111070 | 238.605   | 272.481   | 215.58    | 0         | 144.387   | 110.899   | 33.1394   | 150.578   | 361.545   | 282.037    | 185.651    | 35.093     | S-adenosylmethionine decarboxylase-ornithine decarboxylase, putative            |
| PVX_111075 | 0         | 46.7835   | 0         | 0         | 21.2602   | 0         | 0         | 0         | 25.3875   | 70.6159    | 40.0085    | 0          | hypothetical protein, conserved                                                 |
| PVX_111080 | 21.3958   | 29.863    | 0         | 0         | 0         | 0         | 0         | 89.1156   | 48.6296   | 37.5937    | 68.138     | 34.6144    | hypothetical protein, conserved                                                 |
| PVX_111085 | 164.698   | 115.028   | 0         | 0         | 52.2824   | 0         | 0         | 62.4154   | 86.7888   | 16.3921    | 0          | 0          | protein phosphatases PP1 regulatory subunit sds22, putative                     |
| PVX_111090 | 54.4113   | 0         | 0         | 0         | 0         | 278.456   | 0         | 0         | 20.6162   | 19.1176    | 21.661     | 0          | hypothetical protein, conserved                                                 |
| PVX_111095 | 131.923   | 0         | 164.093   | 0         | 0         | 0         | 0         | 91.6184   | 49.9888   | 46.3488    | 105.038    | 0          | hypothetical protein, conserved                                                 |
| PVX_111100 | 0         | 0         | 0         | 0         | 0         | 0         | 0         | 0         | 0         | 107.308    | 0          | 0          | hypothetical protein, conserved                                                 |
| PVX_111105 | 0         | 0         | 0         | 0         | 0         | 0         | 0         | 0         | 0         | 0          | 15.2159    | 0          | phosphatidylinositol N-acetylglucosaminyltransferase subunit A, putative (PIGA) |
| PVX_111110 | 41.1132   | 28.6989   | 0         | 131.371   | 0         | 0         | 62.8502   | 0         | 31.1524   | 43.3387    | 32.7336    | 0          | hypothetical protein, conserved                                                 |
| PVX_111115 | 0         | 0         | 0         | 0         | 0         | 0         | 0         | 0         | 0         | 46.1717    | 26.1699    | 0          | hypothetical protein                                                            |
| PVX_111120 | 0         | 20.1697   | 0         | 0         | 9.16183   | 0         | 0         | 40.1255   | 21.8956   | 10.1551    | 23.0085    | 0          | asparagine-rich antigen, putative                                               |
| PVX_111125 | 0         | 20.2417   | 0         | 0         | 9.19452   | 0         | 0         | 40.2685   | 0         | 20.3826    | 17.3179    | 0          | ribosome maturation factor RimM, putative (RimM)                                |
| PVX_111130 | 0         | 0         | 0         | 0         | 0         | 0         | 0         | 0         | 0         | 0          | 0          | 0          | hypothetical protein, conserved                                                 |
| PVX_111135 | 0         | 0         | 0         | 0         | 0         | 0         | 0         | 0         | 29.3436   | 0          | 30.8267    | 0          | hypothetical protein, conserved                                                 |
| PVX_111140 | 0         | 0         | 0         | 0         | 0         | 0         | 0         | 0         | 0         | 0          | 0          | 0          | protein phosphatase 1, regulatory (inhibitor) subunit, putative                 |
| PVX_111145 | 0         | 0         | 0         | 0         | 0         | 0         | 0         | 0         | 0         | 43.003     | 0          | 0          | hypothetical protein, conserved                                                 |
| PVX_111150 | 0         | 43.9143   | 0         | 100.495   | 9.97405   | 0         | 0         | 0         | 0         | 0          | 18.7851    | 0          | RNA helicase, putative                                                          |
| PVX_111155 | 0         | 0         | 0         | 0         | 10.518    | 0         | 0         | 0         | 25.1347   | 0          | 13.2058    | 53.686     | hypothetical protein, conserved                                                 |
| PVX_111160 | 0         | 0         | 0         | 0         | 0         | 0         | 0         | 0         | 0         | 0          | 0          | 0          | hypothetical protein, conserved                                                 |
| PVX_111165 | 0         | 0         | 0         | 0         | 0         | 0         | 0         | 0         | 0         | 0          | 0          | 0          | MORN repeat-containing protein 1, putative (MORN1)                              |
| PVX_111170 | 0         | 0         | 0         | 0         | 0         | 0         | 0         | 0         | 0         | 0          | 0          | 0          | hypothetical protein, conserved                                                 |
| PVX_111175 | 0         | 0         | 0         | 0         | 0         | 0         | 0         | 0         | 0         | 0          | 20.9645    | 170.785    | ookimete surface protein Pvs25                                                  |
| PVX_111180 | 0         | 0         | 0         | 0         | 0         | 0         | 0         | 0         | 0         | 0          | 0          | 0          | sexual stage surface protein Pvs28                                              |
| PVX_111185 | 0         | 67.7486   | 0         | 0         | 0         | 0         | 134.75    | 147.031   | 34.0687   | 57.9174    | 0          | 0          | calmodulin, putative                                                            |
| PVX_111190 | 0         | 141.708   | 0         | 0         | 0         | 1041.38   | 0         | 0         | 153.673   | 71.1261    | 80.6644    | 0          | RNA methyltransferase, putative                                                 |
| PVX_111195 | 127.377   | 29.6389   | 0         | 135.677   | 13.4652   | 0         | 0         | 176.883   | 112.604   | 44.7572    | 76.0617    | 68.7316    | tRNA N6-adenosine threonylcarbamoyltransferase, putative (KAE1)                 |
| PVX_111200 | 313.186   | 0         | 311.619   | 200.269   | 39.7484   | 0         | 0         | 0         | 94.9373   | 198.062    | 274.296    | 0          | 26S proteasome regulatory subunit RPN9, putative (RPN9)                         |
| PVX_111205 | 0         | 0         | 0         | 0         | 0         | 0         | 0         | 0         | 0         | 0          | 0          | 0          | hypothetical protein, conserved                                                 |
| PVX_111210 | 0         | 0         | 0         | 0         | 8.51008   | 0         | 0         | 0         | 20.3388   | 0          | 0          | 0          | hypothetical protein, conserved                                                 |
| PVX_111215 | 0         | 0         | 0         | 0         | 0         | 0         | 0         | 0         | 28.0331   | 0          | 14.7253    | 0          | hypothetical protein, conserved                                                 |
| PVX_111220 | 48.84     | 51.1279   | 0         | 0         | 7.74099   | 0         | 0         | 33.9049   | 9.25073   | 8.58136    | 14.5818    | 39.5104    | RNA helicase, putative                                                          |
| PVX_111225 | 0         | 0         | 0         | 0         | 60.7671   | 0         | 0         | 0         | 0         | 67.0332    | 114.026    | 0          | transcription elongation factor SPT4, putative (SPT4)                           |
| PVX_111230 | 0         | 0         | 45.2016   | 0         | 0         | 0         | 0         | 0         | 0         | 0          | 3.62139    | 0          | hypothetical protein, conserved                                                 |

| Gene ID    | Patient 1 | Patient 2 | Patient 3 | Patient 4 | Patient 5 | Patient 6 | Patient 7 | Patient 8 | Patient 9 | Patient 10 | Patient 11 | Patient 12 | Gene Description                                                        |
|------------|-----------|-----------|-----------|-----------|-----------|-----------|-----------|-----------|-----------|------------|------------|------------|-------------------------------------------------------------------------|
| Patient    |           |           |           |           |           |           |           |           |           |            |            |            |                                                                         |
| PVX_111235 | 79.7086   | 55.668    | 0         | 0         | 25.3014   | 0         | 122.001   | 0         | 60.413    | 28.0024    | 126.932    | 0          | Secretory protein, putative                                             |
| PVX_111240 | 0         | 0         | 0         | 0         | 0         | 0         | 0         | 0         | 0         | 0          | 0          | 0          | hypothetical protein, conserved                                         |
| PVX_111245 | 1172.65   | 0         | 194.549   | 0         | 421.842   | 0         | 239.302   | 868.788   | 977.647   | 1757.72    | 840.32     | 506.71     | adenosine deaminase, putative                                           |
| PVX_111250 | 0         | 75.718    | 0         | 0         | 0         | 0         | 0         | 0         | 0         | 0          | 21.5739    | 175.764    | hypothetical protein, conserved                                         |
| PVX_111255 | 59.8715   | 83.6064   | 148.918   | 0         | 37.9908   | 0         | 91.5809   | 83.155    | 22.6859   | 42.0711    | 119.174    | 96.9659    | hypothetical protein, conserved                                         |
| PVX_111260 | 0         | 0         | 0         | 0         | 0         | 0         | 0         | 0         | 0         | 0          | 35.8186    | 10.1458    | hypothetical protein, conserved                                         |
| PVX_111265 | 0         | 0         | 0         | 0         | 0         | 0         | 82.9114   | 0         | 61.6238   | 57.1445    | 53.9557    | 0          | WD domain, G-beta repeat domain containing protein                      |
| PVX_111270 | 22.2302   | 0         | 0         | 0         | 7.04646   | 0         | 0         | 0         | 0         | 23.4358    | 17.6988    | 35.9652    | hypothetical protein, conserved                                         |
| PVX_111275 | 0         | 0         | 0         | 0         | 11.4759   | 0         | 0         | 0         | 0         | 0          | 0          | 0          | hypothetical protein                                                    |
| PVX_111280 | 0         | 0         | 0         | 0         | 0         | 0         | 0         | 0         | 0         | 0          | 0          | 0          | hypothetical protein, conserved                                         |
| PVX_111285 | 0         | 0         | 0         | 0         | 153.433   | 0         | 0         | 0         | 0         | 0          | 95.8579    | 0          | hypothetical protein, conserved                                         |
| PVX_111290 | 0         | 0         | 0         | 0         | 0         | 0         | 0         | 0         | 0         | 0          | 18.5421    | 0          | merozoite TRAP-like protein, putative (MTRAP)                           |
| PVX_111292 | 0         | 0         | 0         | 0         | 0         | 0         | 0         | 0         | 0         | 0          | 0          | 0          | conserved Plasmodium protein, unknown function                          |
| PVX_111295 | 37.7012   | 0         | 93.7154   | 0         | 0         | 0         | 0         | 104.703   | 42.8495   | 39.7427    | 22.5126    | 0          | hypothetical protein, conserved                                         |
| PVX_111300 | 112.889   | 157.749   | 0         | 361.448   | 71.7255   | 0         | 172.97    | 156.872   | 42.7903   | 0          | 22.4721    | 0          | brx domain containing protein                                           |
| PVX_111305 | 0         | 0         | 0         | 0         | 0         | 0         | 138.303   | 0         | 0         | 63.463     | 89.903     | 0          | rRNA-processing protein EBP2, putative (EBP2)                           |
| PVX_111310 | 0         | 0         | 0         | 0         | 0         | 0         | 0         | 0         | 0         | 0          | 0          | 0          | hypothetical protein, conserved                                         |
| PVX_111315 | 0         | 0         | 0         | 0         | 29.326    | 0         | 70.6865   | 64.2022   | 140.128   | 64.9775    | 128.832    | 0          | protoporphyrinogen oxidase, putative (PPO)                              |
| PVX_111320 | 0         | 37.4414   | 0         | 171.423   | 34.0243   | 0         | 0         | 74.4799   | 40.6392   | 18.8428    | 10.6747    | 0          | hypothetical protein, conserved                                         |
| PVX_111325 | 0         | 0         | 0         | 0         | 0         | 0         | 0         | 0         | 0         | 0          | 0          | 0          | palmitoyltransferase, putative (DHHC10)                                 |
| PVX_111330 | 1699.13   | 711.887   | 845.437   | 434.672   | 301.945   | 347.96    | 519.939   | 472.017   | 1081.67   | 907.37     | 771.13     | 330.297    | 60S ribosomal protein L3, putative (RPL3)                               |
| PVX_111335 | 0         | 0         | 0         | 0         | 0         | 0         | 0         | 0         | 0         | 0          | 105.824    | 0          | centrin-3, putative (CEN3)                                              |
| PVX_111340 | 0         | 0         | 0         | 0         | 0         | 0         | 0         | 147.205   | 40.1543   | 74.4255    | 42.1773    | 0          | hypothetical protein, conserved                                         |
| PVX_111345 | 0         | 0         | 0         | 1566      | 0         | 0         | 0         | 0         | 0         | 169.687    | 385.57     | 0          | hypothetical protein, conserved                                         |
| PVX_111350 | 192.096   | 134.187   | 0         | 0         | 0         | 0         | 0         | 0         | 36.4026   | 134.959    | 76.4772    | 0          | DNA-directed RNA polymerase II, putative                                |
| PVX_111355 | 70.7594   | 0         | 176.053   | 0         | 44.9115   | 0         | 108.273   | 98.2875   | 53.6268   | 24.8595    | 183.103    | 0          | merozoite capping protein 1, putative                                   |
| PVX_111360 | 0         | 0         | 0         | 0         | 0         | 0         | 0         | 0         | 0         | 0          | 0          | 0          | hypothetical protein, conserved                                         |
| PVX_111365 | 0         | 97.8846   | 0         | 0         | 14.824    | 0         | 0         | 64.9067   | 35.4164   | 49.2675    | 46.516     | 75.6686    | U3 small nucleolar ribonucleoprotein protein MPP10, putative            |
| PVX_111370 | 0         | 0         | 0         | 0         | 0         | 0         | 0         | 0         | 0         | 5.8427     | 0          | 0          | hypothetical protein                                                    |
| PVX_111375 | 0         | 0         | 0         | 0         | 0         | 0         | 0         | 0         | 0         | 0          | 0          | 0          | biotin-[acetyl-CoA-carboxylase] synthetase, putative                    |
| PVX_111380 | 768.45    | 716.02    | 638.345   | 1640.99   | 284.916   | 0         | 589       | 1958.01   | 1019.58   | 944.644    | 1198.3     | 831.299    | 40S ribosomal protein S2, putative (RPS2)                               |
| PVX_111385 | 0         | 0         | 0         | 0         | 0         | 0         | 0         | 0         | 0         | 0          | 0          | 0          | hypothetical protein                                                    |
| PVX_111387 | 0         | 0         | 0         | 0         | 0         | 0         | 0         | 0         | 0         | 0          | 0          | 0          | conserved Plasmodium protein, unknown function                          |
| PVX_111390 | 0         | 0         | 0         | 0         | 0         | 0         | 0         | 0         | 0         | 0          | 0          | 0          | cell division cycle protein 20 homolog, putative                        |
| PVX_111395 | 0         | 0         | 0         | 0         | 0         | 0         | 0         | 0         | 13.4821   | 0          | 7.08344    | 0          | hypothetical protein, conserved                                         |
| PVX_111400 | 0         | 0         | 0         | 0         | 0         | 0         | 0         | 0         | 22.1088   | 20.5008    | 58.072     | 0          | hypothetical protein, conserved                                         |
| PVX_111405 | 0         | 0         | 0         | 0         | 0         | 0         | 0         | 0         | 0         | 0          | 0          | 0          | hypothetical protein, conserved                                         |
| PVX_111410 | 0         | 72.0483   | 0         | 0         | 65.5106   | 0         | 0         | 143.3     | 78.1786   | 36.2269    | 123.178    | 0          | hypothetical protein, conserved                                         |
| PVX_111415 | 0         | 0         | 0         | 0         | 0         | 0         | 0         | 0         | 0         | 0          | 4.68912    | 0          | conserved Plasmodium protein, unknown function                          |
| PVX_111420 | 0         | 0         | 0         | 0         | 0         | 0         | 0         | 0         | 0         | 0          | 0          | 0          | hypothetical protein                                                    |
| PVX_111425 | 0         | 0         | 0         | 0         | 71.8558   | 0         | 346.856   | 313.791   | 0         | 79.1841    | 89.816     | 0          | hypothetical protein                                                    |
| PVX_111430 | 0         | 0         | 0         | 0         | 0         | 0         | 0         | 0         | 0         | 0          | 613.585    | 0          | cytochrome c oxidase copper chaperone, putative (COX17)                 |
| PVX_111435 | 0         | 4.08099   | 14.526    | 0         | 1.85324   | 0         | 0         | 16.2385   | 4.43081   | 4.11111    | 10.4774    | 9.4584     | hypothetical protein, conserved                                         |
| PVX_111440 | 0         | 0         | 0         | 0         | 0         | 0         | 39.835    | 0         | 0         | 0          | 10.3782    | 0          | hypothetical protein, conserved                                         |
| PVX_111445 | 35.2509   | 24.6049   | 0         | 112.62    | 0         | 0         | 0         | 146.843   | 53.4186   | 74.3204    | 91.2141    | 0          | hypothetical protein, conserved                                         |
| PVX_111450 | 0         | 0         | 0         | 0         | 0         | 0         | 0         | 0         | 42.7903   | 0          | 67.4164    | 0          | hypothetical protein                                                    |
| PVX_111455 | 43.0307   | 30.0382   | 0         | 275.011   | 27.2934   | 0         | 0         | 59.7551   | 48.9086   | 15.1199    | 94.216     | 0          | glutamine-fructose-6-phosphate aminotransferase [isomerizing], putative |
| PVX_111460 | 0         | 0         | 0         | 0         | 0         | 0         | 0         | 0         | 0         | 0          | 13.6303    | 0          | hypothetical protein, conserved                                         |
| PVX_111465 | 0         | 0         | 0         | 0         | 19.7192   | 0         | 0         | 47.5252   | 43.18     | 11.7811    | 54.639     | 18.5697    | hypothetical protein, conserved                                         |
| PVX_111470 | 224.031   | 234.536   | 139.183   | 178.898   | 88.7782   | 286.399   | 85.5838   | 155.528   | 201.563   | 98.4056    | 211.81     | 90.6268    | hypothetical protein, conserved                                         |
| PVX_111475 | 64.1182   | 0         | 0         | 0         | 0         | 0         | 0         | 0         | 24.2957   | 45.0542    | 63.8141    | 0          | hypothetical protein, conserved                                         |
| PVX_111480 | 0         | 54.9333   | 0         | 0         | 0         | 0         | 0         | 29.808    | 27.6333   | 62.6289    | 127.459    | 0          | RAP protein, putative                                                   |
| PVX_111485 | 166.42    | 0         | 0         | 533.648   | 0         | 0         | 255.427   | 0         | 126.208   | 116.879    | 265.044    | 0          | hypothetical protein, conserved                                         |
| PVX_111490 | 0         | 0         | 203.268   | 0         | 0         | 0         | 0         | 0         | 30.9512   | 28.6921    | 32.5149    | 132.355    | hypothetical protein, conserved                                         |
| PVX_111495 | 0         | 85.9303   | 306.41    | 0         | 78.151    | 0         | 0         | 683.599   | 93.2306   | 86.3833    | 293.755    | 0          | hypothetical protein, conserved                                         |
| PVX_111500 | 0         | 0         | 0         | 0         | 0         | 0         | 0         | 0         | 0         | 0          | 181.384    | 0          | RNA-binding protein, putative                                           |
| PVX_111510 | 0         | 0         | 0         | 0         | 0         | 0         | 0         | 0         | 0         | 7.83334    | 0          | 0          | hypothetical protein                                                    |
| PVX_111515 | 48.9368   | 68.3271   | 0         | 156.404   | 15.522    | 0         | 0         | 0         | 0         | 34.3892    | 38.9629    | 0          | hypothetical protein, conserved                                         |
| PVX_111520 | 65.785    | 39.3448   | 116.71    | 60.0053   | 17.8678   | 48.0298   | 28.7042   | 52.1845   | 60.515    | 42.9353    | 102.879    | 45.5966    | hypothetical protein, conserved                                         |
| PVX_111525 | 0         | 0         | 0         | 0         | 0         | 0         | 0         | 0         | 0         | 0          | 0          | 0          | hypothetical protein, conserved                                         |
| PVX_111530 | 0         | 0         | 0         | 0         | 0         | 0         | 0         | 0         | 0         | 0          | 0          | 0          | hypothetical protein, conserved                                         |
| PVX_111535 | 0         | 0         | 0         | 0         | 0         | 0         | 0         | 0         | 0         | 0          | 0          | 0          | hypothetical protein, conserved                                         |

| Gene ID    | Patient 1 | Patient 2 | Patient 3 | Patient 4 | Patient 5 | Patient 6 | Patient 7 | Patient 8 | Patient 9 | Patient 10 | Patient 11 | Patient 12 | Gene Description                                                        |
|------------|-----------|-----------|-----------|-----------|-----------|-----------|-----------|-----------|-----------|------------|------------|------------|-------------------------------------------------------------------------|
| PVX_111540 | 1023.57   | 0         | 2613.99   | 0         | 664.586   | 0         | 0         | 1434.69   | 390.329   | 715.917    | 407.985    | 1702.06    | hypothetical protein                                                    |
| PVX_111545 | 0         | 0         | 559.408   | 0         | 71.3135   | 0         | 0         | 0         | 84.9219   | 78.5905    | 222.854    | 0          | mitotic spindle assembly checkpoint protein, putative                   |
| PVX_111550 | 0         | 0         | 0         | 0         | 0         | 0         | 0         | 0         | 654.128   | 1787.75    | 340.797    | 0          | hypothetical protein, conserved                                         |
| PVX_111555 | 96.1512   | 67.1656   | 0         | 0         | 30.533    | 0         | 0         | 133.591   | 145.767   | 101.328    | 38.2797    | 0          | orotidine 5'-phosphate decarboxylase, putative (OMPDC)                  |
| PVX_111560 | 5.72877   | 0         | 0         | 0         | 1.81515   | 0         | 8.74777   | 7.95241   | 8.67952   | 4.02664    | 0          | 0          | dynein heavy chain, putative                                            |
| PVX_111565 | 0         | 0         | 186.86    | 0         | 0         | 0         | 0         | 0         | 0         | 0          | 29.8954    | 0          | hypothetical protein, conserved                                         |
| PVX_111570 | 0         | 0         | 0         | 0         | 53.0372   | 0         | 0         | 231.812   | 63.2219   | 117.096    | 33.1923    | 0          | hypothetical protein, conserved                                         |
| PVX_111575 | 39.0842   | 0         | 0         | 0         | 37.1817   | 0         | 0         | 108.545   | 44.4219   | 41.2004    | 54.4566    | 63.2625    | 4-hydroxy-3-methylbut-2-en-1-yl diphosphate synthase, putative (GcpE)   |
| PVX_111580 | 0         | 0         | 0         | 0         | 0         | 0         | 0         | 0         | 0         | 0          | 28.5577    | 0          | phospholipid scramblase, putative                                       |
| PVX_111590 | 69.7599   | 73.0376   | 86.6957   | 0         | 11.0596   | 0         | 0         | 0         | 13.2141   | 49.0256    | 34.7132    | 0          | kelch domain-containing protein                                         |
| PVX_111595 | 21.6717   | 0         | 0         | 0         | 0         | 0         | 0         | 0         | 3.28427   | 3.04594    | 16.8233    | 35.0824    | citrate synthase, mitochondrial precursor, putative                     |
| PVX_111600 | 49.5326   | 69.1596   | 246.333   | 0         | 0         | 0         | 0         | 68.7884   | 56.3012   | 104.423    | 69.0155    | 0          | serine/arginine-rich splicing factor 4, putative (SRSF4)                |
| PVX_112100 | 0         | 0         | 0         | 0         | 0         | 0         | 0         | 0         | 0         | 0          | 0          | 0          | hypothetical protein                                                    |
| PVX_112105 | 120.468   | 0         | 149.822   | 0         | 0         | 308.309   | 0         | 0         | 45.6468   | 21.1629    | 23.9793    | 0          | Phist protein (Pf-fam-b)                                                |
| PVX_112110 | 189.228   | 528.402   | 117.625   | 0         | 15.0044   | 0         | 72.333    | 131.392   | 233.006   | 216.087    | 103.58     | 0          | Phist protein (Pf-fam-b)                                                |
| PVX_112115 | 0         | 0         | 0         | 0         | 0         | 0         | 0         | 0         | 0         | 0          | 0          | 0          | variable surface protein Vir6, putative                                 |
| PVX_112120 | 0         | 0         | 0         | 0         | 0         | 0         | 0         | 0         | 0         | 0          | 0          | 0          | Pv-fam-c protein                                                        |
| PVX_112125 | 0         | 0         | 0         | 0         | 0         | 0         | 0         | 0         | 0         | 0          | 0          | 0          | variable surface protein Vir18, putative                                |
| PVX_112625 | 0         | 0         | 0         | 0         | 77.9826   | 0         | 0         | 0         | 0         | 0          | 0          | 0          | Pvstp1, truncated, putative                                             |
| PVX_112630 | 0         | 0         | 0         | 163.476   | 0         | 0         | 0         | 71.0304   | 0         | 0          | 40.7222    | 0          | variable surface protein Vir12, putative                                |
| PVX_112635 | 0         | 0         | 0         | 0         | 0         | 0         | 0         | 0         | 0         | 74.6722    | 0          | 0          | hypothetical protein                                                    |
| PVX_112640 | 0         | 0         | 0         | 0         | 0         | 0         | 0         | 0         | 0         | 0          | 0          | 0          | hypothetical protein                                                    |
| PVX_112645 | 0         | 0         | 0         | 0         | 0         | 0         | 0         | 0         | 0         | 0          | 0          | 0          | variable surface protein Vir17-like                                     |
| PVX_112650 | 0         | 0         | 0         | 0         | 0         | 0         | 0         | 627.565   | 0         | 157.837    | 89.6421    | 0          | hypothetical protein                                                    |
| PVX_112655 | 0         | 63.3046   | 0         | 144.9     | 14.3804   | 0         | 0         | 0         | 0         | 47.7951    | 36.1004    | 0          | tryptophan-rich antigen (Pv-fam-a)                                      |
| PVX_112660 | 142.108   | 99.3269   | 0         | 0         | 0         | 0         | 0         | 0         | 53.8765   | 0          | 28.2897    | 0          | tryptophan-rich antigen (Pv-fam-a)                                      |
| PVX_112665 | 0         | 857.801   | 0         | 0         | 73.0991   | 393.135   | 0         | 0         | 0         | 80.9097    | 61.1245    | 124.391    | tryptophan-rich antigen (Pv-fam-a)                                      |
| PVX_112670 | 252.984   | 1448.25   | 251.632   | 0         | 128.393   | 1035.62   | 154.742   | 140.534   | 191.704   | 337.777    | 151.068    | 0          | tryptophan-rich antigen (Pv-fam-a)                                      |
| PVX_112675 | 0         | 86.3505   | 0         | 131.841   | 0         | 0         | 0         | 0         | 46.8547   | 14.4781    | 8.20359    | 66.7886    | tryptophan-rich antigen (Pv-fam-a)                                      |
| PVX_112680 | 234.674   | 327.652   | 116.698   | 0         | 44.6588   | 240.141   | 215.289   | 130.358   | 248.955   | 247.371    | 158.818    | 75.9865    | tryptophan/threonine-rich antigen                                       |
| PVX_112685 | 0         | 209.415   | 0         | 0         | 23.7938   | 0         | 0         | 104.138   | 142.045   | 52.6751    | 14.9227    | 0          | tryptophan-rich antigen (Pv-fam-a)                                      |
| PVX_112690 | 971.663   | 937.796   | 142.154   | 91.3589   | 54.3985   | 585.06    | 87.4206   | 635.057   | 942.071   | 873.564    | 142.213    | 138.843    | tryptophan-rich antigen (Pv-fam-a)                                      |
| PVX_112695 | 0         | 66.7348   | 0         | 0         | 0         | 0         | 0         | 0         | 0         | 0          | 0          | 0          | Pv-fam-d protein                                                        |
| PVX_112700 | 0         | 123.932   | 0         | 0         | 0         | 0         | 0         | 0         | 33.6222   | 124.662    | 17.6597    | 0          | PST-A protein                                                           |
| PVX_112705 | 0         | 91.7381   | 0         | 0         | 0         | 0         | 0         | 0         | 49.7634   | 92.208     | 52.2631    | 0          | tryptophan-rich antigen (Pv-fam-a)                                      |
| PVX_112710 | 0         | 0         | 0         | 0         | 0         | 0         | 0         | 0         | 40.6357   | 37.6583    | 0          | 0          | Pv-fam-d protein                                                        |
| PVX_112715 | 0         | 0         | 0         | 0         | 0         | 0         | 0         | 0         | 0         | 0          | 0          | 0          | Pv-fam-c protein                                                        |
| PVX_112720 | 0         | 0         | 0         | 0         | 0         | 0         | 0         | 0         | 0         | 0          | 0          | 0          | variable surface protein Vir12-related                                  |
| PVX_113220 | 0         | 0         | 0         | 0         | 0         | 0         | 0         | 0         | 34.5475   | 0          | 0          | 0          | VIR protein,PIR protein                                                 |
| PVX_113225 | 0         | 78.5767   | 0         | 0         | 0         | 576.546   | 0         | 0         | 0         | 79.0058    | 0          | 0          | Plasmodium exported protein, unknown function                           |
| PVX_113230 | 0         | 0         | 0         | 0         | 0         | 0         | 0         | 127.424   | 0         | 32.2191    | 36.5141    | 0          | variable surface protein Vir14-related,PIR protein                      |
| PVX_113235 | 393.214   | 1578.43   | 244.436   | 785.463   | 171.493   | 503       | 68.2592   | 558.681   | 379.943   | 352.207    | 159.161    | 0          | Pv-fam-d protein                                                        |
| PVX_113240 | 177.609   | 0         | 0         | 0         | 28.1949   | 0         | 0         | 0         | 67.3112   | 218.375    | 53.0317    | 143.942    | hypothetical protein                                                    |
| PVX_113245 | 210.138   | 734.036   | 0         | 336.337   | 100.117   | 538.521   | 0         | 291.988   | 637.186   | 369.071    | 355.56     | 170.383    | hypothetical protein                                                    |
| PVX_113250 | 0         | 170.221   | 0         | 0         | 0         | 0         | 0         | 338.539   | 138.513   | 213.902    | 24.2463    | 0          | hypothetical protein                                                    |
| PVX_113255 | 181.25    | 126.749   | 0         | 0         | 0         | 0         | 0         | 0         | 137.469   | 0          | 0          | 0          | hypothetical protein, conserved                                         |
| PVX_113260 | 0         | 0         | 0         | 0         | 0         | 0         | 0         | 0         | 0         | 18.7083    | 10.5985    | 0          | hypothetical protein                                                    |
| PVX_113265 | 0         | 0         | 0         | 0         | 0         | 0         | 0         | 31.6342   | 8.63121   | 8.00683    | 27.2107    | 0          | hypothetical protein, conserved                                         |
| PVX_113270 | 22.595    | 15.7686   | 0         | 0         | 14.3243   | 0         | 0         | 0         | 0         | 23.8204    | 22.4866    | 36.5558    | ATP-dependent RNA helicase, putative                                    |
| PVX_113275 | 0         | 0         | 0         | 0         | 45.3219   | 0         | 0         | 0         | 162.145   | 150.201    | 141.899    | 0          | hypothetical protein, conserved                                         |
| PVX_113280 | 0         | 0         | 0         | 0         | 0         | 0         | 0         | 0         | 0         | 0          | 0          | 0          | liver merozoite formation protein, putative                             |
| PVX_113285 | 0         | 0         | 0         | 105.157   | 0         | 0         | 0         | 45.7061   | 12.4703   | 0          | 19.6557    | 0          | elongation factor G, putative                                           |
| PVX_113290 | 0         | 0         | 0         | 0         | 33.0995   | 0         | 0         | 0         | 157.997   | 73.2128    | 0          | 0          | geranylgeranyltransferase, putative                                     |
| PVX_113295 | 0         | 35.3093   | 62.8591   | 0         | 8.01905   | 0         | 0         | 0         | 19.1658   | 0          | 20.1403    | 0          | hypothetical protein, conserved                                         |
| PVX_113300 | 0         | 0         | 0         | 0         | 0         | 0         | 0         | 116.985   | 63.8257   | 0          | 16.7623    | 0          | hypothetical protein, conserved                                         |
| PVX_113305 | 0         | 107.49    | 0         | 0         | 0         | 0         | 0         | 0         | 19.4453   | 0          | 30.6467    | 0          | hypothetical protein, conserved                                         |
| PVX_113310 | 144.024   | 0         | 179.176   | 230.303   | 22.854    | 0         | 0         | 100.029   | 27.2883   | 25.2995    | 28.6685    | 0          | hypothetical protein, conserved                                         |
| PVX_113315 | 0         | 0         | 0         | 0         | 0         | 0         | 0         | 0         | 0         | 52.8965    | 29.9709    | 0          | hypothetical protein, conserved                                         |
| PVX_113320 | 142.647   | 0         | 354.918   | 228.096   | 45.2701   | 0         | 0         | 0         | 27.0272   | 75.1728    | 127.774    | 115.55     | hypothetical protein, conserved                                         |
| PVX_113325 | 0         | 50.0459   | 0         | 0         | 22.744    | 0         | 0         | 0         | 27.1571   | 25.1779    | 99.8575    | 0          | mitochondrial chaperone BCS1, putative                                  |
| PVX_113330 | 177.126   | 41.2236   | 0         | 188.755   | 56.1955   | 0         | 0         | 0         | 89.4859   | 41.4884    | 105.771    | 0          | dihydroorotate dehydrogenase, mitochondrial precursor, putative (DHODH) |
| PVX_113335 | 0         | 71.2864   | 84.616    | 0         | 53.9714   | 348.236   | 52.0317   | 0         | 77.3839   | 47.8509    | 33.8812    | 0          | trophozoite exported protein 1, putative (TEX1)                         |



| Gene ID    | Patient 1 | Patient 2 | Patient 3 | Patient 4 | Patient 5 | Patient 6 | Patient 7 | Patient 8 | Patient 9 | Patient 10 | Patient 11 | Patient 12 | Gene Description                                                  |
|------------|-----------|-----------|-----------|-----------|-----------|-----------|-----------|-----------|-----------|------------|------------|------------|-------------------------------------------------------------------|
| Patient    |           |           |           |           |           |           |           |           |           |            |            |            |                                                                   |
| PVX_113340 | 79.7086   | 0         | 198.369   | 0         | 25.3014   | 0         | 0         | 221.456   | 60.413    | 56.0048    | 47.5993    | 0          | cation/H+ antiporter, putative                                    |
| PVX_113345 | 12.4249   | 17.3399   | 0         | 0         | 3.93745   | 0         | 0         | 17.2488   | 18.8255   | 17.4658    | 24.7302    | 20.0961    | ARID/BRIGHT DNA binding domain containing protein                 |
| PVX_113350 | 0         | 0         | 0         | 0         | 66.3168   | 0         | 0         | 0         | 52.7916   | 24.4727    | 41.5968    | 0          | phenylalanine-tRNA ligase, putative                               |
| PVX_113355 | 0         | 0         | 0         | 0         | 0         | 0         | 0         | 0         | 6.43048   | 5.96571    | 20.2733    | 27.4606    | hypothetical protein, conserved                                   |
| PVX_113360 | 0         | 0         | 0         | 0         | 0         | 0         | 0         | 0         | 0         | 0          | 0          | 0          | hypothetical protein, conserved                                   |
| PVX_113365 | 39.8745   | 0         | 0         | 0         | 12.6386   | 0         | 0         | 27.6798   | 15.1047   | 14.0125    | 15.8732    | 0          | hypothetical protein, conserved                                   |
| PVX_113370 | 0         | 0         | 0         | 0         | 0         | 0         | 0         | 0         | 0         | 0          | 6.34269    | 0          | transcription factor with AP2 domain(s), putative (ApiAP2)        |
| PVX_113375 | 0         | 0         | 0         | 0         | 56.4142   | 0         | 0         | 0         | 0         | 62.2566    | 0          | 0          | mitochondrial ribosomal protein L41, putative                     |
| PVX_113380 | 92.8954   | 0         | 115.485   | 148.439   | 29.4632   | 0         | 0         | 64.5023   | 70.3915   | 65.2809    | 92.4526    | 0          | hypothetical protein, conserved                                   |
| PVX_113385 | 0         | 0         | 0         | 0         | 53.3365   | 0         | 0         | 0         | 0         | 58.8769    | 33.3789    | 0          | hypothetical protein, conserved                                   |
| PVX_113390 | 32.0277   | 22.3481   | 106.07    | 34.084    | 6.76611   | 0         | 32.6091   | 14.8205   | 60.6575   | 48.774     | 50.9977    | 34.5328    | hypothetical protein, conserved                                   |
| PVX_113395 | 0         | 0         | 0         | 0         | 0         | 0         | 0         | 28.4598   | 0         | 0          | 12.2403    | 0          | DNA helicase, putative                                            |
| PVX_113400 | 0         | 0         | 0         | 0         | 0         | 0         | 0         | 0         | 0         | 0          | 23.7295    | 193.382    | glyoxalase I, putative                                            |
| PVX_113405 | 45.5697   | 0         | 0         | 0         | 0         | 0         | 0         | 0         | 8.63121   | 32.0273    | 13.6053    | 36.8631    | RAP protein, putative                                             |
| PVX_113410 | 0         | 0         | 0         | 0         | 0         | 0         | 0         | 0         | 0         | 122.285    | 0          | 0          | hypothetical protein, conserved                                   |
| PVX_113415 | 0         | 108.661   | 0         | 0         | 0         | 0         | 0         | 216.086   | 0         | 54.5854    | 0          | 0          | 50S ribosomal protein L24, putative                               |
| PVX_113420 | 120.408   | 84.0492   | 199.549   | 0         | 0         | 0         | 61.3543   | 111.467   | 30.4117   | 112.824    | 79.8887    | 64.9667    | RNA-binding protein, putative                                     |
| PVX_113430 | 0         | 0         | 0         | 0         | 0         | 0         | 0         | 0         | 0         | 0          | 164.685    | 0          | hypothetical protein, conserved                                   |
| PVX_113435 | 0         | 0         | 0         | 0         | 20.4623   | 0         | 0         | 0         | 0         | 0          | 51.3456    | 0          | serine/threonine protein kinase, putative (ARK1)                  |
| PVX_113440 | 0         | 0         | 819.268   | 0         | 0         | 0         | 504.337   | 0         | 0         | 0          | 65.094     | 0          | calcium-binding protein, putative                                 |
| PVX_113445 | 0         | 0         | 0         | 196.548   | 0         | 0         | 94.0392   | 0         | 23.2939   | 0          | 24.4735    | 0          | cyclin dependent kinase binding protein, putative                 |
| PVX_113450 | 0         | 0         | 0         | 0         | 5.84266   | 0         | 0         | 0         | 0         | 0          | 7.33826    | 0          | nucleoside diphosphate kinase, putative                           |
| PVX_113455 | 0         | 0         | 0         | 0         | 0         | 0         | 0         | 0         | 0         | 0          | 0          | 0          | hypothetical protein, conserved                                   |
| PVX_113460 | 0         | 0         | 86.2623   | 0         | 0         | 0         | 0         | 0         | 6.57646   | 6.10111    | 20.7335    | 0          | DNA repair protein RAD50, putative (RAD50)                        |
| PVX_113465 | 133.025   | 92.9674   | 0         | 426.162   | 0         | 0         | 203.953   | 924.448   | 100.859   | 140.161    | 52.9624    | 0          | long chain polyunsaturated fatty acid elongation enzyme, putative |
| PVX_113470 | 0         | 18.7861   | 0         | 0         | 0         | 0         | 0         | 0         | 50.9846   | 28.3764    | 16.073     | 43.5539    | hypothetical protein, conserved                                   |
| PVX_113475 | 109.622   | 114.803   | 136.312   | 0         | 17.3878   | 0         | 0         | 0         | 20.7678   | 115.549    | 87.281     | 0          | RNA-binding protein, putative                                     |
| PVX_113480 | 0         | 0         | 0         | 0         | 0         | 0         | 0         | 487.381   | 0         | 0          | 0          | 0          | ubiquitin-conjugating enzyme E2 I, putative                       |
| PVX_113485 | 0         | 0         | 397.361   | 0         | 0         | 0         | 0         | 0         | 0         | 0          | 0          | 0          | hypothetical protein, conserved                                   |
| PVX_113490 | 0         | 0         | 0         | 0         | 0         | 0         | 0         | 0         | 0         | 0          | 101.851    | 0          | hypothetical protein, conserved                                   |
| PVX_113495 | 87.7061   | 336.738   | 218.053   | 280.273   | 41.7233   | 0         | 67.0445   | 60.8975   | 99.6871   | 123.27     | 157.118    | 0          | polypyrimidine tract binding protein, putative                    |
| PVX_113500 | 0         | 22.7227   | 40.4464   | 0         | 15.48     | 0         | 0         | 0         | 24.6689   | 28.6077    | 16.2029    | 0          | hypothetical protein, conserved                                   |
| PVX_113505 | 67.225    | 31.2766   | 55.6774   | 0         | 0         | 0         | 102.706   | 93.3338   | 84.8855   | 31.4981    | 40.1415    | 0          | coatamer alpha subunit, putative                                  |
| PVX_113510 | 194.653   | 0         | 0         | 0         | 123.925   | 0         | 0         | 0         | 147.649   | 0          | 193.764    | 0          | glutaredoxin-like protein, putative                               |
| PVX_113515 | 69.8302   | 64.9781   | 231.346   | 74.34     | 14.7568   | 0         | 35.5632   | 193.903   | 132.264   | 81.7966    | 97.2934    | 37.6595    | translation initiation factor IF-2, putative                      |
| PVX_113520 | 0         | 0         | 0         | 0         | 0         | 0         | 0         | 0         | 0         | 0          | 0          | 0          | MYND finger protein, putative                                     |
| PVX_113525 | 0         | 0         | 0         | 0         | 0         | 0         | 0         | 0         | 33.6222   | 0          | 17.6597    | 143.799    | RING zinc finger protein, putative                                |
| PVX_113530 | 0         | 0         | 0         | 0         | 0         | 0         | 0         | 116.655   | 31.823    | 0          | 66.8605    | 0          | uroporphyrinogen III decarboxylase, putative (UROD)               |
| PVX_113535 | 52.4963   | 36.6502   | 130.547   | 167.798   | 0         | 0         | 80.2807   | 72.9063   | 59.6711   | 73.7798    | 62.6958    | 0          | hypothetical protein, conserved                                   |
| PVX_113540 | 68.0684   | 0         | 0         | 0         | 0         | 0         | 0         | 94.5471   | 51.5865   | 23.9145    | 40.6475    | 110.267    | para-hydroxybenzoate--polyprenyltransferase, putative (COQ2)      |
| PVX_113545 | 0         | 0         | 0         | 0         | 0         | 0         | 0         | 0         | 0         | 0          | 0          | 0          | spindle assembly abnormal protein 6, putative (SAS6)              |
| PVX_113550 | 0         | 0         | 0         | 0         | 0         | 0         | 0         | 0         | 0         | 0          | 0          | 0          | hypothetical protein                                              |
| PVX_113555 | 56.686    | 0         | 0         | 0         | 17.9833   | 0         | 0         | 157.456   | 42.9568   | 79.6665    | 78.9832    | 0          | GTP-binding protein, putative                                     |
| PVX_113560 | 74.5543   | 0         | 0         | 0         | 23.6407   | 0         | 56.979    | 103.525   | 14.1225   | 52.3944    | 66.7783    | 0          | hypothetical protein, conserved                                   |
| PVX_113565 | 0         | 0         | 0         | 0         | 32.1973   | 0         | 0         | 0         | 0         | 0          | 100.904    | 0          | WD domain, G-beta repeat domain containing protein                |
| PVX_113567 | 26.6527   | 0         | 0         | 0         | 0         | 0         | 0         | 37.0057   | 0         | 28.0976    | 37.135     | 43.1256    | conserved Plasmodium protein, unknown function                    |
| PVX_113570 | 188.503   | 0         | 0         | 604.84    | 0         | 0         | 0         | 262.141   | 71.489    | 66.1869    | 187.64     | 0          | hypothetical protein, conserved                                   |
| PVX_113574 | 0         | 0         | 0         | 0         | 16.4714   | 0         | 0         | 0         | 0         | 18.2587    | 5.17102    | 0          | hypothetical protein, conserved                                   |
| PVX_113576 | 73.7934   | 0         | 0         | 0         | 23.4204   | 0         | 0         | 102.505   | 27.9637   | 103.7      | 132.2      | 0          | sorting assembly machinery 50 kDa subunit, putative (SAM50)       |
| PVX_113580 | 0         | 0         | 707.162   | 0         | 0         | 0         | 0         | 0         | 0         | 99.1544    | 337.525    | 0          | hypothetical protein, conserved                                   |
| PVX_113585 | 0         | 123.981   | 442.458   | 1706.14   | 169.243   | 0         | 272.221   | 0         | 470.644   | 435.796    | 564.753    | 864.3      | proteasome subunit alpha type-2, putative                         |
| PVX_113590 | 0         | 0         | 0         | 0         | 0         | 0         | 0         | 0         | 0         | 0          | 0          | 0          | hypothetical protein, conserved                                   |
| PVX_113595 | 450.784   | 174.836   | 249.094   | 480.258   | 158.873   | 0         | 76.5905   | 208.676   | 588.293   | 351.973    | 378.849    | 162.194    | T-complex protein 1, zeta subunit, putative                       |
| PVX_113600 | 0         | 42.6019   | 0         | 0         | 0         | 0         | 93.3326   | 0         | 46.2383   | 21.437     | 24.2899    | 197.64     | ornithine aminotransferase, putative                              |
| PVX_113605 | 76.6619   | 0         | 0         | 0         | 0         | 0         | 117.183   | 53.2262   | 29.0436   | 40.4064    | 38.1478    | 0          | hypothetical protein, conserved                                   |
| PVX_113610 | 5.19684   | 21.7557   | 25.8124   | 16.589    | 4.93977   | 0         | 15.8708   | 21.6419   | 17.7155   | 10.9583    | 21.7215    | 0          | hypothetical protein, conserved                                   |
| PVX_113615 | 0         | 0         | 0         | 0         | 0         | 0         | 157.971   | 0         | 39.0893   | 0          | 41.0592    | 0          | transporter protein, putative                                     |
| PVX_113617 | 0         | 48.5289   | 0         | 0         | 22.054    | 0         | 0         | 96.5308   | 52.6686   | 73.2471    | 27.6666    | 0          | citrate synthase-like protein, putative                           |
| PVX_113620 | 0         | 35.1048   | 0         | 0         | 31.8997   | 0         | 0         | 0         | 38.1037   | 17.6679    | 0          | 0          | hypothetical protein, conserved                                   |
| PVX_113625 | 0         | 0         | 0         | 0         | 0         | 0         | 0         | 0         | 17.275    | 0          | 0          | 0          | cardiolipin synthetase, putative (CLS)                            |
| PVX_113630 | 0         | 0         | 0         | 0         | 0         | 0         | 0         | 0         | 0         | 0          | 0          | 0          | hypothetical protein, conserved                                   |
| PVX_113635 | 19.7917   | 13.8118   | 0         | 0         | 0         | 0         | 0         | 0         | 7.49722   | 6.95512    | 11.818     | 64.0359    | hypothetical protein, conserved                                   |

| Gene ID     | Patient 1 | Patient 2 | Patient 3 | Patient 4 | Patient 5 | Patient 6 | Patient 7 | Patient 8 | Patient 9 | Patient 10 | Patient 11 | Patient 12 | Gene Description                                                                   |
|-------------|-----------|-----------|-----------|-----------|-----------|-----------|-----------|-----------|-----------|------------|------------|------------|------------------------------------------------------------------------------------|
| Patient     |           |           |           |           |           |           |           |           |           |            |            |            |                                                                                    |
| PVX_113640  | 0         | 0         | 0         | 0         | 0         | 0         | 0         | 0         | 0         | 24.8989    | 0          | 0          | palmitoyltransferase, putative (DHHC2)                                             |
| PVX_113645  | 33.0127   | 0         | 0         | 0         | 5.2314    | 0         | 0         | 22.9158   | 12.5051   | 23.2027    | 29.5687    | 0          | hypothetical protein, conserved                                                    |
| PVX_113650  | 0         | 0         | 0         | 324.124   | 64.3216   | 0         | 0         | 0         | 115.143   | 35.5714    | 80.6315    | 0          | 50S ribosomal protein L19, putative                                                |
| PVX_113655  | 153.274   | 0         | 0         | 0         | 48.6491   | 0         | 117.288   | 106.458   | 116.167   | 107.695    | 213.569    | 124.177    | step II splicing factor, putative                                                  |
| PVX_113660  | 0         | 84.2836   | 0         | 192.963   | 0         | 0         | 92.3235   | 335.314   | 22.8696   | 106.029    | 48.0556    | 97.752     | hypothetical protein, conserved                                                    |
| PVX_113665  | 653.622   | 152.433   | 0         | 0         | 138.787   | 0         | 669.903   | 606.146   | 165.289   | 76.4881    | 563.9      | 0          | histone H3, putative                                                               |
| PVX_113670  | 0         | 0         | 0         | 0         | 52.159    | 0         | 0         | 227.983   | 186.535   | 57.5834    | 32.6448    | 0          | hypothetical protein, conserved                                                    |
| PVX_113675  | 112.724   | 78.6827   | 93.4003   | 0         | 47.6589   | 192.195   | 172.302   | 156.526   | 128.117   | 66.0154    | 97.2271    | 0          | transketolase, putative (TK)                                                       |
| PVX_113680  | 52.0499   | 18.1631   | 129.34    | 0         | 24.7502   | 0         | 0         | 0         | 69.0117   | 36.5811    | 56.9804    | 0          | transcription elongation factor SPT5, putative (SPT5)                              |
| PVX_113685  | 0         | 0         | 0         | 0         | 0         | 0         | 0         | 0         | 35.3768   | 32.7901    | 0          | 0          | SNARE associated Golgi protein, putative                                           |
| PVX_113690  | 0         | 0         | 0         | 0         | 0         | 0         | 0         | 0         | 0         | 0          | 0          | 0          | hypothetical protein, conserved                                                    |
| PVX_113695  | 85.6595   | 59.8286   | 0         | 0         | 27.1943   | 0         | 0         | 119.002   | 0         | 30.0921    | 68.2045    | 0          | transcription factor with AP2 domain(s), putative (ApiAP2)                         |
| PVX_113705  | 0         | 0         | 0         | 0         | 0         | 0         | 0         | 229.432   | 62.5882   | 87.029     | 115.062    | 0          | hypothetical protein, conserved                                                    |
| PVX_113710  | 0         | 0         | 0         | 0         | 0         | 0         | 0         | 0         | 13.3389   | 0          | 21.0246    | 0          | hypothetical protein, conserved                                                    |
| PVX_113720  | 0         | 0         | 0         | 0         | 0         | 0         | 0         | 0         | 0         | 0          | 0          | 0          | hypothetical protein, conserved                                                    |
| PVX_113725  | 0         | 0         | 0         | 0         | 0         | 0         | 0         | 54.962    | 0         | 0          | 0          | 0          | hypothetical protein, conserved                                                    |
| PVX_113725a | 0         | 5660.63   | 21771.7   | 0         | 0         | 0         | 13649     | 11092.1   | 2982.93   | 2612.32    | 4576.46    | 0          | 60S ribosomal protein L39, putative                                                |
| PVX_113731  | 19.7672   | 6.89643   | 24.5489   | 0         | 6.26384   | 0         | 15.0941   | 0         | 37.437    | 10.4202    | 13.7704    | 15.9846    | hypothetical protein                                                               |
| PVX_113735  | 0         | 0         | 0         | 0         | 88.7198   | 0         | 0         | 0         | 0         | 0          | 0          | 0          | hypothetical protein                                                               |
| PVX_113740  | 176.21    | 123.077   | 219.317   | 281.899   | 83.9172   | 0         | 134.889   | 0         | 33.3904   | 185.705    | 157.842    | 0          | hypothetical protein, conserved                                                    |
| PVX_113745  | 0         | 0         | 0         | 0         | 0         | 0         | 0         | 0         | 0         | 0          | 133.106    | 0          | hypothetical protein, conserved                                                    |
| PVX_113750  | 445.863   | 116.734   | 138.608   | 178.159   | 17.6805   | 0         | 170.478   | 232.211   | 126.703   | 313.309    | 266.246    | 90.2525    | eukaryotic translation initiation factor 3 subunit 6 interacting protein, putative |
| PVX_113755  | 0         | 0         | 0         | 0         | 6.20315   | 0         | 0         | 0         | 0         | 0          | 0          | 0          | hypothetical protein, conserved                                                    |
| PVX_113757  | 0         | 0         | 0         | 0         | 0         | 0         | 0         | 0         | 0         | 199.393    | 0          | 0          | conserved protein, unknown function                                                |
| PVX_113760  | 0         | 0         | 0         | 0         | 113.506   | 0         | 0         | 0         | 202.912   | 125.257    | 142.033    | 0          | hypothetical protein, conserved                                                    |
| PVX_113765  | 0         | 0         | 0         | 0         | 0         | 0         | 0         | 0         | 0         | 0          | 0          | 0          | hypothetical protein, conserved                                                    |
| PVX_113770  | 0         | 0         | 0         | 253.615   | 25.1666   | 0         | 0         | 0         | 0         | 0          | 0          | 0          | hypothetical protein, conserved                                                    |
| PVX_113775  | 101.036   | 0         | 0         | 0         | 0         | 0         | 0         | 0         | 0         | 0          | 0          | 0          | 6-cysteine protein (P12)                                                           |
| PVX_113780  | 0         | 0         | 0         | 0         | 0         | 0         | 0         | 113.77    | 31.0362   | 57.5417    | 48.9062    | 0          | 6-cysteine protein                                                                 |
| PVX_113785  | 181.827   | 158.664   | 0         | 290.536   | 28.8339   | 465.136   | 69.4999   | 0         | 120.556   | 95.8329    | 117.624    | 73.5905    | nuclear GTP-binding protein 1, putative                                            |
| PVX_113790  | 122.299   | 85.4599   | 304.729   | 0         | 38.8613   | 627.157   | 187.445   | 339.929   | 46.3603   | 171.823    | 97.3829    | 198.42     | hypothetical protein, conserved                                                    |
| PVX_113795  | 0         | 164.914   | 0         | 0         | 0         | 0         | 0         | 0         | 0         | 0          | 0          | 0          | hypothetical protein, conserved                                                    |
| PVX_113797  | 0         | 0         | 0         | 0         | 0         | 0         | 0         | 0         | 0         | 0          | 0          | 0          | conserved Plasmodium protein, unknown function                                     |
| PVX_113800  | 0         | 0         | 0         | 0         | 0         | 0         | 0         | 0         | 11.0658   | 10.2645    | 5.8141     | 0          | rhoptry protein, putative (ROP14)                                                  |
| PVX_113805  | 0         | 0         | 0         | 0         | 0         | 0         | 0         | 0         | 44.0126   | 0          | 0          | 0          | 50S ribosomal protein L18, putative                                                |
| PVX_113810  | 63.6566   | 22.215    | 79.1039   | 0         | 0         | 0         | 0         | 0         | 60.2887   | 22.3685    | 57.0168    | 0          | AP-3 complex subunit beta, putative                                                |
| PVX_113815  | 0         | 0         | 0         | 0         | 0         | 0         | 0         | 0         | 0         | 0          | 0          | 0          | hypothetical protein, conserved                                                    |
| PVX_113820  | 0         | 35.4637   | 252.634   | 0         | 64.452    | 0         | 0         | 70.5463   | 96.233    | 35.6967    | 91.0008    | 82.2494    | syntaxin binding protein, putative                                                 |
| PVX_113825  | 60.7365   | 10.5947   | 37.7119   | 0         | 2.40565   | 38.7988   | 23.1874   | 10.5391   | 23.0054   | 8.00439    | 21.1554    | 24.5556    | transcription factor with AP2 domain(s), putative (ApiAP2)                         |
| PVX_113830  | 0         | 0         | 0         | 0         | 0         | 0         | 0         | 21.9326   | 5.98431   | 5.55187    | 3.14447    | 0          | myosin-like protein, putative                                                      |
| PVX_113835  | 0         | 0         | 0         | 0         | 0         | 0         | 0         | 82.3283   | 0         | 20.8266    | 23.5981    | 0          | thiamin-phosphate pyrophosphorylase, putative                                      |
| PVX_113844  | 0         | 0         | 0         | 0         | 0         | 0         | 0         | 0         | 13.5468   | 0          | 0          | 0          | hypothetical protein, conserved                                                    |
| PVX_113846  | 32.276    | 22.5276   | 0         | 0         | 0         | 0         | 0         | 0         | 36.6821   | 11.3416    | 25.6972    | 52.2325    | cytosolic Fe-5 cluster assembly factor NAR1, putative (NAR1)                       |
| PVX_113850  | 70.4186   | 73.7275   | 0         | 0         | 11.1641   | 0         | 0         | 48.89     | 66.6944   | 61.8606    | 14.0164    | 0          | transporter, putative                                                              |
| PVX_113855  | 0         | 0         | 0         | 0         | 0         | 0         | 0         | 226.322   | 0         | 0          | 97.2216    | 0          | hypothetical protein, conserved                                                    |
| PVX_113860  | 1299.93   | 1249.64   | 2837.34   | 520.995   | 206.734   | 0         | 498.732   | 1129.55   | 1047.42   | 1255.34    | 1002.8     | 527.855    | 60S ribosomal protein L19, putative                                                |
| PVX_113865  | 44.596    | 0         | 0         | 0         | 0         | 0         | 0         | 0         | 33.7922   | 0          | 8.87668    | 0          | hypothetical protein, conserved                                                    |
| PVX_113870  | 0         | 0         | 0         | 0         | 0         | 0         | 0         | 0         | 0         | 0          | 0          | 0          | hypothetical protein, conserved                                                    |
| PVX_113875  | 0         | 0         | 0         | 0         | 27.0387   | 0         | 0         | 0         | 225.943   | 119.681    | 101.723    | 0          | endonuclease III homologue, putative                                               |
| PVX_113880  | 29.1248   | 20.3273   | 0         | 0         | 18.4669   | 0         | 0         | 0         | 33.1      | 20.4688    | 34.7824    | 0          | hypothetical protein, conserved                                                    |
| PVX_113885  | 0         | 108.851   | 0         | 0         | 0         | 0         | 0         | 0         | 0         | 0          | 0          | 0          | hypothetical protein, conserved                                                    |
| PVX_113890  | 0         | 0         | 0         | 0         | 0         | 0         | 0         | 0         | 0         | 0          | 0          | 0          | enoyl-acyl carrier protein reductase                                               |
| PVX_113895  | 0         | 0         | 0         | 0         | 0         | 0         | 0         | 0         | 0         | 0          | 18.5421    | 0          | hypothetical protein, conserved                                                    |
| PVX_113900  | 0         | 0         | 0         | 0         | 16.1958   | 261.272   | 78.0786   | 70.9087   | 77.3818   | 35.8799    | 40.6525    | 0          | GPI-anchored wall transfer protein 1, putative (GWT1)                              |
| PVX_113905  | 21.2757   | 14.8456   | 0         | 0         | 3.70799   | 0         | 16.2464   | 29.5353   | 20.1471   | 22.4308    | 25.4079    | 0          | hypothetical protein, conserved                                                    |
| PVX_113910  | 0         | 0         | 0         | 0         | 0         | 0         | 0         | 0         | 0         | 0          | 0          | 0          | cdc2-like protein kinase, putative                                                 |
| PVX_113915  | 13.0939   | 54.821    | 32.5255   | 0         | 24.8971   | 0         | 19.9989   | 36.3552   | 39.6784   | 9.20308    | 26.0618    | 21.1785    | hypothetical protein, conserved                                                    |
| PVX_113920  | 0         | 215.594   | 0         | 0         | 98.2507   | 0         | 0         | 0         | 0         | 324.022    | 122.573    | 501.993    | RNA and export factor binding protein, putative                                    |
| PVX_113925  | 27.8991   | 0         | 69.3308   | 0         | 0         | 0         | 0         | 38.7366   | 21.1378   | 9.80375    | 16.6593    | 45.1438    | hypothetical protein, conserved                                                    |
| PVX_113930  | 0         | 0         | 0         | 0         | 7.09584   | 0         | 0         | 0         | 8.48006   | 15.7333    | 4.4557     | 36.2173    | hypothetical protein, conserved                                                    |
| PVX_113935  | 0         | 0         | 0         | 0         | 0         | 0         | 0         | 0         | 38.0365   | 0          | 0          | 0          | pyridoxal kinase, putative (PDXK)                                                  |
| PVX_113940  | 0         | 0         | 0         | 0         | 0         | 0         | 0         | 0         | 0         | 127.231    | 72.2199    | 0          | hypothetical protein, conserved                                                    |

| Gene ID    | Patient 1 | Patient 2 | Patient 3 | Patient 4 | Patient 5 | Patient 6 | Patient 7 | Patient 8 | Patient 9 | Patient 10 | Patient 11 | Patient 12 | Gene Description                                             |
|------------|-----------|-----------|-----------|-----------|-----------|-----------|-----------|-----------|-----------|------------|------------|------------|--------------------------------------------------------------|
| Patient    |           |           |           |           |           |           |           |           |           |            |            |            |                                                              |
| PVX_113945 | 42.2187   | 0         | 0         | 134.908   | 13.3889   | 215.98    | 0         | 0         | 31.9903   | 14.8346    | 16.8069    | 0          | hypothetical protein, conserved                              |
| PVX_113950 | 201.218   | 0         | 0         | 0         | 0         | 0         | 309.181   | 0         | 76.3177   | 70.6468    | 80.1201    | 0          | hypothetical protein, conserved                              |
| PVX_113955 | 49.543    | 0         | 61.5532   | 0         | 0         | 0         | 0         | 0         | 9.3839    | 8.70486    | 29.5833    | 0          | hypothetical protein, conserved                              |
| PVX_113960 | 0         | 0         | 0         | 0         | 0         | 0         | 0         | 0         | 0         | 0          | 0          | 0          | hypothetical protein                                         |
| PVX_113965 | 0         | 0         | 0         | 0         | 0         | 0         | 0         | 0         | 0         | 0          | 0          | 0          | hypothetical protein, conserved                              |
| PVX_113970 | 0         | 35.0456   | 124.827   | 0         | 15.923    | 0         | 0         | 0         | 57.0594   | 0          | 59.9525    | 0          | hypothetical protein, conserved                              |
| PVX_113975 | 0         | 0         | 0         | 0         | 0         | 0         | 0         | 0         | 0         | 0          | 15.4134    | 0          | ras GTPase, putative                                         |
| PVX_113980 | 0         | 0         | 0         | 194.54    | 0         | 0         | 0         | 0         | 46.1125   | 21.3787    | 36.3358    | 197.102    | malate:quinone oxidoreductase, putative                      |
| PVX_113985 | 0         | 0         | 0         | 0         | 0         | 0         | 0         | 0         | 0         | 0          | 9.41543    | 0          | hypothetical protein, conserved                              |
| PVX_113990 | 0         | 189.28    | 0         | 0         | 28.6798   | 0         | 276.605   | 125.494   | 102.7     | 95.1945    | 107.884    | 146.418    | mitochondrial import receptor subunit TOM40, putative        |
| PVX_113995 | 0         | 0         | 0         | 78.4652   | 0         | 0         | 37.5368   | 0         | 0         | 8.63318    | 14.6698    | 0          | AP-2 complex subunit alpha, putative                         |
| PVX_114000 | 227.572   | 211.903   | 0         | 0         | 72.23     | 0         | 0         | 105.374   | 114.985   | 186.55     | 241.596    | 0          | hypothetical protein, conserved                              |
| PVX_114005 | 0         | 378.459   | 0         | 0         | 0         | 0         | 0         | 0         | 0         | 0          | 0          | 0          | hypothetical protein                                         |
| PVX_114010 | 0         | 0         | 0         | 820.206   | 0         | 0         | 392.717   | 0         | 0         | 0          | 50.7994    | 0          | hypothetical protein, conserved                              |
| PVX_114015 | 0         | 0         | 0         | 0         | 133.368   | 0         | 644.7     | 0         | 0         | 876.829    | 663.843    | 0          | histone H2A, putative                                        |
| PVX_114020 | 0         | 0         | 0         | 0         | 0         | 0         | 0         | 0         | 63.2219   | 58.5481    | 0          | 0          | histone H3 variant, putative                                 |
| PVX_114025 | 0         | 0         | 91.9701   | 0         | 0         | 0         | 0         | 0         | 28.0347   | 26.0023    | 58.9167    | 0          | hypothetical protein, conserved                              |
| PVX_114030 | 0         | 0         | 0         | 0         | 17.1979   | 0         | 0         | 75.2925   | 0         | 19.0482    | 21.5823    | 0          | hypothetical protein, conserved                              |
| PVX_114035 | 269.657   | 94.2302   | 336.066   | 0         | 171.423   | 691.667   | 413.461   | 936.999   | 306.685   | 426.181    | 268.403    | 656.475    | hypothetical protein, conserved                              |
| PVX_114040 | 902.823   | 1367.38   | 375.22    | 964.576   | 430.613   | 1544.55   | 1384.98   | 1045.86   | 1083.95   | 1796.66    | 1258.1     | 977.277    | 60S ribosomal protein L27a, putative                         |
| PVX_114045 | 0         | 0         | 0         | 0         | 17.1045   | 0         | 0         | 0         | 0         | 18.9449    | 0          | 87.3117    | hypothetical protein, conserved                              |
| PVX_114050 | 181.757   | 63.4782   | 0         | 290.796   | 0         | 0         | 0         | 252.518   | 68.8843   | 63.8495    | 361.803    | 147.312    | malate dehydrogenase, putative                               |
| PVX_114055 | 144.634   | 101.096   | 0         | 463.505   | 45.9835   | 0         | 221.835   | 201.048   | 274.176   | 50.7948    | 86.378     | 234.804    | rhomboid protease ROM10, putative                            |
| PVX_114060 | 0         | 0         | 0         | 0         | 145.006   | 0         | 466.387   | 211.308   | 115.264   | 266.905    | 242.081    | 0          | trafficking protein particle complex subunit 6A, putative    |
| PVX_114065 | 0         | 0         | 0         | 0         | 20.5779   | 0         | 49.5953   | 90.119    | 12.2939   | 11.4032    | 58.1333    | 0          | hypothetical protein, conserved                              |
| PVX_114070 | 0         | 0         | 131.942   | 0         | 0         | 0         | 0         | 0         | 0         | 37.2835    | 42.2433    | 0          | N-acetylglucosamine transferase, putative                    |
| PVX_114075 | 66.4266   | 15.4525   | 0         | 0         | 7.01855   | 113.206   | 0         | 30.7417   | 16.7755   | 23.343     | 57.2935    | 0          | hypothetical protein, conserved                              |
| PVX_114080 | 0         | 0         | 0         | 0         | 0         | 0         | 0         | 0         | 0         | 121.037    | 0          | 0          | hypothetical protein, conserved                              |
| PVX_114085 | 62.1967   | 21.7053   | 0         | 0         | 0         | 0         | 0         | 43.18     | 0         | 21.8556    | 24.7596    | 0          | hypothetical protein, conserved                              |
| PVX_114090 | 9.13781   | 0         | 0         | 0         | 2.89554   | 0         | 0         | 3.4612    | 0         | 9.09381    | 0          | 0          | hypothetical protein, conserved                              |
| PVX_114095 | 118.495   | 110.284   | 196.375   | 378.615   | 125.253   | 202.047   | 181.135   | 383.934   | 284.319   | 319.215    | 416.682    | 0          | cell division cycle protein 48 homologue, putative           |
| PVX_114100 | 119.587   | 16.6918   | 59.4297   | 76.3878   | 37.908    | 0         | 0         | 33.2071   | 81.543    | 100.858    | 76.1689    | 38.6968    | acyl-CoA synthetase, putative                                |
| PVX_114105 | 0         | 30.7937   | 0         | 0         | 0         | 0         | 0         | 0         | 66.8513   | 15.4999    | 35.1217    | 0          | hypothetical protein, conserved                              |
| PVX_114110 | 0         | 0         | 0         | 0         | 11.3929   | 0         | 0         | 0         | 0         | 12.6254    | 28.6068    | 0          | hypothetical protein, conserved                              |
| PVX_114115 | 0         | 9.15291   | 0         | 0         | 12.4705   | 0         | 0         | 0         | 24.8426   | 0          | 13.0538    | 0          | hypothetical protein, conserved                              |
| PVX_114120 | 0         | 0         | 0         | 0         | 0         | 0         | 0         | 0         | 0         | 140.348    | 79.5832    | 0          | splicing factor 3a subunit, putative                         |
| PVX_114125 | 0         | 112.54    | 0         | 257.734   | 76.7258   | 0         | 0         | 0         | 0         | 28.3048    | 64.1515    | 0          | hypothetical protein, conserved                              |
| PVX_114130 | 0         | 0         | 0         | 0         | 0         | 0         | 244.897   | 221.875   | 60.5131   | 0          | 31.7714    | 0          | hypothetical protein, conserved                              |
| PVX_114135 | 0         | 0         | 0         | 0         | 0         | 0         | 0         | 0         | 0         | 0          | 0          | 0          | hypothetical protein, conserved                              |
| PVX_114140 | 43.2804   | 0         | 0         | 0         | 0         | 0         | 0         | 0         | 0         | 0          | 17.2296    | 0          | hypothetical protein, conserved                              |
| PVX_114145 | 0         | 0         | 0         | 0         | 0         | 0         | 0         | 0         | 0         | 0          | 0          | 0          | merozoite surface protein 10, putative                       |
| PVX_114150 | 63.1678   | 44.1066   | 0         | 0         | 60.1284   | 0         | 0         | 0         | 23.9354   | 0          | 50.2945    | 0          | cleavage stimulation factor subunit 1, putative              |
| PVX_114155 | 0         | 0         | 0         | 0         | 0         | 0         | 0         | 0         | 58.2262   | 0          | 91.7151    | 0          | hypothetical protein, conserved                              |
| PVX_114160 | 0         | 0         | 255.063   | 0         | 32.5298   | 0         | 156.882   | 0         | 38.8207   | 35.9783    | 81.5544    | 0          | DnaJ domain containing protein                               |
| PVX_114163 | 0         | 0         | 0         | 0         | 0         | 0         | 0         | 0         | 0         | 0          | 0          | 0          | tRNA Alanine                                                 |
| PVX_114165 | 0         | 0         | 0         | 0         | 0         | 0         | 0         | 0         | 0         | 0          | 0          | 0          | hypothetical protein                                         |
| PVX_114167 | 0         | 0         | 0         | 0         | 0         | 0         | 0         | 0         | 0         | 0          | 0          | 0          | tRNA Leucine                                                 |
| PVX_114170 | 0         | 60.6011   | 0         | 0         | 0         | 0         | 0         | 60.277    | 49.3357   | 30.5037    | 34.5595    | 0          | hypothetical protein, conserved                              |
| PVX_114175 | 0         | 0         | 0         | 0         | 6.53938   | 0         | 63.0374   | 28.6435   | 7.81528   | 0          | 0          | 0          | hypothetical protein, conserved                              |
| PVX_114180 | 126.805   | 443.067   | 0         | 0         | 120.892   | 0         | 0         | 528.701   | 288.418   | 356.297    | 151.457    | 0          | pyridoxine biosynthesis protein PDX1, putative               |
| PVX_114185 | 46.5201   | 162.377   | 115.666   | 0         | 14.7546   | 0         | 0         | 0         | 88.1266   | 130.765    | 92.5968    | 150.628    | hypothetical protein, conserved                              |
| PVX_114190 | 0         | 0         | 0         | 0         | 0         | 0         | 0         | 0         | 0         | 0          | 0          | 0          | Pfs77, putative                                              |
| PVX_114195 | 0         | 0         | 0         | 414.488   | 20.5662   | 0         | 0         | 0         | 0         | 113.859    | 25.803     | 104.986    | hypothetical protein, conserved                              |
| PVX_114197 | 0         | 0         | 0         | 0         | 0         | 0         | 0         | 0         | 0         | 0          | 0          | 0          | tRNA Serine                                                  |
| PVX_114200 | 36.785    | 0         | 0         | 0         | 17.4883   | 0         | 0         | 27.8685   | 25.8538   | 21.965     | 0          | 0          | hypothetical protein, conserved                              |
| PVX_114205 | 305.523   | 142.291   | 253.607   | 0         | 194.066   | 0         | 155.987   | 566.016   | 308.797   | 357.737    | 263.544    | 165.133    | nascent polypeptide associated complex alpha chain, putative |
| PVX_114210 | 111.045   | 77.5106   | 92.0081   | 0         | 58.6858   | 189.33    | 169.734   | 51.3983   | 210.348   | 130.065    | 169.456    | 59.9098    | signal recognition particle subunit SRP68, putative (SRP68)  |
| PVX_114215 | 0         | 0         | 0         | 0         | 0         | 0         | 0         | 0         | 0         | 0          | 0          | 0          | hypothetical protein, conserved                              |
| PVX_114220 | 0         | 0         | 0         | 0         | 0         | 0         | 0         | 0         | 0         | 7.72939    | 0          | 0          | hypothetical protein, conserved                              |
| PVX_114225 | 0         | 28.4375   | 0         | 0         | 0         | 0         | 124.554   | 56.5712   | 30.8687   | 0          | 16.2178    | 0          | tRNA modifying enzyme, putative                              |
| PVX_114230 | 41.2458   | 0         | 0         | 0         | 0         | 0         | 0         | 0         | 15.6264   | 28.9857    | 41.049     | 66.7653    | vacuolar transporter chaperone, putative                     |
| PVX_114235 | 565.059   | 0         | 707.162   | 0         | 0         | 0         | 0         | 0         | 107.217   | 99.1544    | 112.508    | 0          | hypothetical protein, conserved                              |

| Gene ID    | Patient 1 | Patient 2 | Patient 3 | Patient 4 | Patient 5 | Patient 6 | Patient 7 | Patient 8 | Patient 9 | Patient 10 | Patient 11 | Patient 12 | Gene Description                                                                |
|------------|-----------|-----------|-----------|-----------|-----------|-----------|-----------|-----------|-----------|------------|------------|------------|---------------------------------------------------------------------------------|
| Patient    |           |           |           |           |           |           |           |           |           |            |            |            |                                                                                 |
| PVX_114240 | 0         | 0         | 0         | 0         | 25.1666   | 0         | 0         | 110.139   | 0         | 0          | 0          | 0          | hypothetical protein, conserved                                                 |
| PVX_114245 | 0         | 0         | 0         | 0         | 0         | 0         | 0         | 0         | 0         | 57.3733    | 32.5256    | 0          | hypothetical protein                                                            |
| PVX_114250 | 0         | 0         | 0         | 0         | 27.4311   | 0         | 0         | 120.037   | 0         | 60.7069    | 34.3986    | 0          | hypothetical protein, conserved                                                 |
| PVX_114255 | 46.0623   | 32.1461   | 0         | 0         | 21.9014   | 0         | 35.1877   | 0         | 113.419   | 40.4668    | 100.851    | 0          | hypothetical protein, conserved                                                 |
| PVX_114260 | 0         | 13.5636   | 0         | 0         | 0         | 0         | 0         | 0         | 7.36298   | 3.4157     | 3.86902    | 0          | transcription factor with AP2 domain(s), putative (ApiAP2)                      |
| PVX_114265 | 0         | 0         | 0         | 0         | 0         | 0         | 0         | 0         | 0         | 21.8237    | 37.0925    | 0          | chorismate synthase                                                             |
| PVX_114270 | 114.698   | 53.3744   | 0         | 244.314   | 36.3709   | 0         | 0         | 53.0897   | 43.4538   | 80.6058    | 30.44      | 61.8827    | hypothetical protein, conserved                                                 |
| PVX_114275 | 0         | 0         | 0         | 0         | 31.5524   | 0         | 0         | 0         | 37.6562   | 34.9004    | 138.442    | 0          | ferredoxin--NADP reductase, putative                                            |
| PVX_114280 | 80.4249   | 0         | 0         | 0         | 25.5292   | 0         | 123.1     | 0         | 30.4781   | 56.5079    | 32.0181    | 0          | hypothetical protein, conserved                                                 |
| PVX_114285 | 0         | 0         | 0         | 0         | 0         | 0         | 0         | 0         | 0         | 0          | 0          | 0          | RNA-binding protein mei2 homologue, putative                                    |
| PVX_114290 | 234.35    | 0         | 0         | 0         | 0         | 0         | 179.562   | 0         | 88.8326   | 82.314     | 93.3021    | 190.079    | superoxide dismutase [Fe], putative (SOD2)                                      |
| PVX_114295 | 0         | 70.2095   | 125.037   | 0         | 15.9498   | 0         | 230.677   | 69.8325   | 38.1037   | 88.3394    | 50.0447    | 81.4164    | hypothetical protein, conserved                                                 |
| PVX_114300 | 0         | 0         | 0         | 0         | 11.2171   | 0         | 0         | 49.122    | 53.6087   | 24.8616    | 35.2072    | 0          | ATP-dependent DEAD box helicase, putative                                       |
| PVX_114305 | 41.6975   | 19.3978   | 0         | 0         | 8.80964   | 0         | 0         | 0         | 21.0595   | 53.7298    | 22.1317    | 0          | tyrosine kinase-like protein, putative (TKL4)                                   |
| PVX_114310 | 0         | 0         | 0         | 0         | 85.7114   | 0         | 0         | 0         | 51.1142   | 0          | 134.202    | 0          | ribonuclease H2 subunit A, putative                                             |
| PVX_114315 | 112.164   | 234.933   | 0         | 0         | 88.9574   | 0         | 171.548   | 0         | 169.996   | 295.568    | 133.957    | 272.457    | hexokinase, putative                                                            |
| PVX_114320 | 0         | 0         | 0         | 0         | 0         | 0         | 0         | 0         | 0         | 0          | 0          | 0          | hypothetical protein, conserved                                                 |
| PVX_114325 | 0         | 0         | 192.526   | 0         | 0         | 0         | 0         | 107.471   | 29.3182   | 27.1796    | 107.8      | 125.361    | hypothetical protein, conserved                                                 |
| PVX_114330 | 0         | 0         | 0         | 0         | 0         | 0         | 0         | 0         | 0         | 52.0558    | 0          | 0          | Plasmodium falciparum CPW-WPC domain containing protein                         |
| PVX_114335 | 45.503    | 31.765    | 0         | 0         | 0         | 0         | 0         | 0         | 0         | 63.9536    | 18.1144    | 73.6654    | hypothetical protein, conserved                                                 |
| PVX_114337 | 0         | 0         | 0         | 0         | 0         | 0         | 0         | 0         | 0         | 417.385    | 0          | 0          | anaphase promoting complex subunit, putative                                    |
| PVX_114340 | 0         | 7.22941   | 0         | 33.0775   | 0         | 0         | 0         | 14.3829   | 0         | 14.5644    | 4.12434    | 0          | SNF2 family N-terminal domain containing protein                                |
| PVX_114344 | 0         | 0         | 0         | 0         | 0         | 0         | 0         | 0         | 0         | 0          | 0          | 0          | N-acetylglucosaminylphosphatidylinositol deacetylase, putative                  |
| PVX_114346 | 0         | 0         | 0         | 0         | 0         | 0         | 0         | 0         | 0         | 0          | 7.68885    | 0          | hypothetical protein, conserved                                                 |
| PVX_114350 | 0         | 0         | 0         | 0         | 0         | 0         | 0         | 0         | 0         | 0          | 15.8242    | 0          | hypothetical protein, conserved                                                 |
| PVX_114355 | 73.4301   | 51.2789   | 0         | 0         | 0         | 0         | 112.369   | 0         | 27.826    | 0          | 29.2331    | 0          | sphingomyelin synthase 1, putative (SMS1)                                       |
| PVX_114360 | 0         | 0         | 0         | 0         | 0         | 0         | 0         | 0         | 0         | 0          | 0          | 0          | sphingomyelin synthase 2, putative (SMS2)                                       |
| PVX_114365 | 0         | 0         | 0         | 0         | 0         | 0         | 0         | 0         | 0         | 30.8901    | 0          | 0          | hypothetical protein, conserved                                                 |
| PVX_114370 | 25.8446   | 0         | 0         | 0         | 0         | 0         | 39.4896   | 71.7666   | 0         | 18.1638    | 15.4324    | 0          | DNA polymerase 1, putative                                                      |
| PVX_114375 | 0         | 59.7714   | 0         | 0         | 0         | 0         | 0         | 0         | 0         | 0          | 0          | 0          | hypothetical protein, conserved                                                 |
| PVX_114380 | 0         | 0         | 0         | 0         | 36.4155   | 0         | 0         | 0         | 0         | 40.2614    | 45.6351    | 0          | hypothetical protein, conserved                                                 |
| PVX_114385 | 0         | 0         | 0         | 163.757   | 0         | 0         | 0         | 0         | 0         | 0          | 30.5941    | 0          | poly(A) polymerase PAP, putative                                                |
| PVX_114390 | 0         | 0         | 0         | 0         | 220.152   | 0         | 0         | 0         | 261.601   | 0          | 205.812    | 0          | hypothetical protein, conserved                                                 |
| PVX_114395 | 0         | 30.0237   | 0         | 0         | 13.6401   | 0         | 0         | 0         | 32.5901   | 30.2252    | 0          | 0          | hypothetical protein, conserved                                                 |
| PVX_114400 | 0         | 0         | 0         | 0         | 0         | 0         | 0         | 0         | 0         | 0          | 0          | 0          | hypothetical protein, conserved                                                 |
| PVX_114405 | 80.6655   | 14.0733   | 100.207   | 64.4007   | 25.5678   | 0         | 92.424    | 27.998    | 91.6698   | 42.5205    | 36.1252    | 0          | hypothetical protein, conserved                                                 |
| PVX_114410 | 0         | 0         | 0         | 0         | 26.9104   | 0         | 0         | 0         | 32.1246   | 29.7787    | 16.8735    | 0          | oxidoreductase, short-chain dehydrogenase family, putative                      |
| PVX_114415 | 112.943   | 118.282   | 0         | 180.524   | 0         | 0         | 0         | 78.4299   | 106.985   | 59.5237    | 89.9248    | 0          | hypothetical protein, conserved                                                 |
| PVX_114420 | 0         | 0         | 0         | 0         | 0         | 0         | 0         | 0         | 0         | 25.7342    | 29.1613    | 0          | 3-oxoacyl-[acyl-carrier-protein] synthase I/II, putative                        |
| PVX_114425 | 0         | 0         | 0         | 0         | 0         | 0         | 0         | 0         | 0         | 0          | 0          | 0          | hypothetical protein, conserved                                                 |
| PVX_114430 | 0         | 0         | 0         | 0         | 0         | 0         | 0         | 0         | 13.4821   | 0          | 7.08344    | 0          | hypothetical protein, conserved                                                 |
| PVX_114435 | 0         | 127.266   | 454.215   | 0         | 57.9122   | 0         | 506.126   | 276.058   | 0         | 108.691    | 0          | 0          | hypothetical protein, conserved                                                 |
| PVX_114440 | 0         | 100.092   | 0         | 0         | 0         | 0         | 219.326   | 0         | 54.3143   | 75.5338    | 28.5307    | 0          | hypothetical protein, conserved                                                 |
| PVX_114445 | 884.246   | 617.309   | 488.603   | 471.018   | 296.052   | 0         | 525.817   | 1159.77   | 930.624   | 1121.94    | 557.355    | 238.61     | pyruvate kinase, putative                                                       |
| PVX_114450 | 66.0586   | 46.1268   | 0         | 0         | 0         | 0         | 101.065   | 0         | 0         | 46.4172    | 39.4473    | 0          | hypothetical protein, conserved                                                 |
| PVX_114455 | 0         | 0         | 0         | 0         | 0         | 0         | 0         | 0         | 0         | 0          | 0          | 0          | hypothetical protein, conserved                                                 |
| PVX_114460 | 0         | 0         | 0         | 0         | 0         | 0         | 25.5963   | 0         | 12.6948   | 11.7773    | 10.0057    | 0          | hypothetical protein, conserved                                                 |
| PVX_114465 | 0         | 0         | 0         | 0         | 0         | 0         | 0         | 0         | 0         | 0          | 162.189    | 0          | troponin c-like protein, putative                                               |
| PVX_114470 | 44.7522   | 31.2405   | 0         | 0         | 14.1932   | 0         | 68.421    | 124.293   | 50.8658   | 15.7246    | 71.262     | 0          | E3 ubiquitin-protein ligase RNF5, putative (RNF5)                               |
| PVX_114475 | 0         | 0         | 0         | 0         | 0         | 0         | 0         | 0         | 0         | 0          | 51.0908    | 0          | mitochondrial import inner membrane translocase subunit TIM22, putative (TIM22) |
| PVX_114480 | 342.966   | 239.544   | 853.679   | 548.637   | 326.645   | 0         | 656.303   | 833.811   | 519.906   | 481.935    | 682.699    | 555.861    | protein DJ-1, putative (DJ1)                                                    |
| PVX_114485 | 0         | 0         | 0         | 0         | 55.5067   | 0         | 133.832   | 0         | 0         | 0          | 0          | 0          | hypothetical protein, conserved                                                 |
| PVX_114490 | 83.541    | 19.4352   | 69.2013   | 88.9476   | 17.6561   | 0         | 0         | 77.3285   | 42.1967   | 19.5709    | 44.3417    | 45.0594    | transportin, putative                                                           |
| PVX_114495 | 0         | 0         | 0         | 0         | 9.58947   | 0         | 0         | 0         | 0         | 21.2574    | 0          | 0          | acetyl-CoA synthetase, putative (ACS)                                           |
| PVX_114500 | 0         | 35.6052   | 126.821   | 0         | 16.1774   | 0         | 0         | 0         | 38.6468   | 35.839     | 50.7577    | 82.578     | ribonuclease P protein subunit p29, putative (POP4)                             |
| PVX_114505 | 283.424   | 0         | 0         | 0         | 0         | 0         | 0         | 0         | 0         | 0          | 0          | 0          | 6-pyruvoyltetrahydropterin synthase, putative                                   |
| PVX_114510 | 0         | 2.2389    | 0         | 0         | 0         | 0         | 0         | 0         | 0         | 0          | 0.638694   | 0          | hypothetical protein, conserved                                                 |
| PVX_114512 | 0         | 16.5122   | 0         | 37.7759   | 3.74947   | 0         | 0         | 0         | 4.48174   | 12.4742    | 16.4849    | 0          | eukaryotic translation initiation factor 2-alpha kinase, putative (PK4)         |
| PVX_114515 | 285.749   | 99.7718   | 0         | 228.461   | 0         | 0         | 437.249   | 297.689   | 189.493   | 401.561    | 312.836    | 115.735    | ethanolaminephosphotransferase, putative                                        |
| PVX_114520 | 0         | 0         | 0         | 0         | 0         | 0         | 0         | 0         | 0         | 0          | 0          | 0          | hypothetical protein, conserved                                                 |
| PVX_114525 | 0         | 0         | 0         | 0         | 0         | 0         | 0         | 0         | 0         | 45.1121    | 76.7066    | 0          | hypothetical protein, conserved                                                 |
| PVX_114530 | 0         | 0         | 0         | 0         | 0         | 0         | 0         | 0         | 33.6222   | 0          | 0          | 0          | hypothetical protein, conserved                                                 |

| Gene ID    | Patient 1 | Patient 2 | Patient 3 | Patient 4 | Patient 5 | Patient 6 | Patient 7 | Patient 8 | Patient 9 | Patient 10 | Patient 11 | Patient 12 | Gene Description                                                                                   |
|------------|-----------|-----------|-----------|-----------|-----------|-----------|-----------|-----------|-----------|------------|------------|------------|----------------------------------------------------------------------------------------------------|
| Patient    |           |           |           |           |           |           |           |           |           |            |            |            |                                                                                                    |
| PVX_114535 | 63.3018   | 44.2002   | 0         | 202.398   | 20.0854   | 0         | 193.677   | 0         | 0         | 0          | 25.2006    | 102.531    | hypothetical protein, conserved                                                                    |
| PVX_114540 | 0         | 0         | 120.954   | 0         | 0         | 0         | 0         | 67.5539   | 0         | 34.1836    | 48.4125    | 0          | glutamyl-tRNA(Gln) amidotransferase subunit B, putative                                            |
| PVX_114545 | 0         | 17.2023   | 0         | 0         | 7.81353   | 0         | 0         | 0         | 28.0121   | 25.9851    | 14.7183    | 0          | hypothetical protein, conserved                                                                    |
| PVX_114550 | 0         | 0         | 0         | 0         | 0         | 0         | 0         | 0         | 104.112   | 0          | 27.3346    | 0          | N-acetyltransferase, putative                                                                      |
| PVX_114555 | 120.408   | 28.0164   | 99.7745   | 128.245   | 25.4555   | 205.313   | 0         | 0         | 15.2058   | 28.2059    | 103.855    | 0          | nicotinate phosphoribosyltransferase, putative (NAPRT)                                             |
| PVX_114560 | 0         | 66.5215   | 474.203   | 0         | 30.2399   | 0         | 0         | 132.31    | 0         | 100.358    | 56.8695    | 0          | DNAJ domain protein, putative                                                                      |
| PVX_114565 | 81.1453   | 141.607   | 0         | 0         | 0         | 622.647   | 0         | 0         | 61.4854   | 42.7691    | 24.2274    | 65.6744    | phosphatidylcholine-sterol acyltransferase precursor, putative                                     |
| PVX_114570 | 0         | 34.5225   | 0         | 0         | 0         | 0         | 75.6156   | 68.6743   | 74.9438   | 86.8753    | 19.686     | 0          | RNA binding function, putative                                                                     |
| PVX_114575 | 34.8799   | 48.6917   | 0         | 111.434   | 0         | 0         | 53.3107   | 96.865    | 66.0704   | 24.5128    | 69.4263    | 0          | transmembrane amino acid transporter protein, putative                                             |
| PVX_114580 | 54.0825   | 37.7584   | 134.497   | 0         | 0         | 0         | 75.1104   | 40.9832   | 38.0043   | 32.2952    | 0          | 0          | hypothetical protein, conserved                                                                    |
| PVX_114585 | 0         | 15.9608   | 0         | 0         | 1.44959   | 23.379    | 13.9719   | 25.4038   | 5.19874   | 4.8237     | 7.28495    | 7.39825    | SET domain containing protein                                                                      |
| PVX_114590 | 84.8881   | 19.7487   | 0         | 0         | 17.941    | 0         | 86.4775   | 0         | 21.4386   | 39.7729    | 61.9531    | 0          | hypothetical protein, conserved                                                                    |
| PVX_114595 | 121.14    | 0         | 0         | 0         | 0         | 0         | 0         | 0         | 45.9206   | 0          | 0          | 0          | sec14-like cytosolic factor or phosphatidylinositol/phosphatidylcholine transfer protein, putative |
| PVX_114600 | 0         | 0         | 0         | 0         | 0         | 0         | 0         | 0         | 0         | 0          | 24.6149    | 0          | Plasmodium falciparum CPW-WPC domain containing protein                                            |
| PVX_114605 | 0         | 0         | 0         | 0         | 0         | 0         | 0         | 0         | 0         | 0          | 0          | 0          | hypothetical protein, conserved                                                                    |
| PVX_114610 | 0         | 147.048   | 0         | 0         | 0         | 0         | 0         | 0         | 0         | 0          | 0          | 0          | hypothetical protein, conserved                                                                    |
| PVX_114615 | 0         | 0         | 0         | 0         | 3.34592   | 0         | 0         | 0         | 0         | 11.132     | 8.40635    | 0          | DNA polymerase epsilon, catalytic subunit a, putative                                              |
| PVX_114620 | 0         | 63.2852   | 0         | 0         | 0         | 0         | 0         | 0         | 0         | 0          | 0          | 0          | hypothetical protein, conserved                                                                    |
| PVX_114625 | 66.8481   | 0         | 0         | 0         | 42.425    | 0         | 0         | 0         | 50.6613   | 23.4859    | 13.3063    | 0          | microtubule-associated protein ytm1 homologue, putative                                            |
| PVX_114630 | 34.437    | 0         | 85.5937   | 0         | 10.919    | 0         | 52.633    | 0         | 52.185    | 0          | 68.5447    | 0          | hypothetical protein, conserved                                                                    |
| PVX_114635 | 54.5108   | 0         | 135.564   | 0         | 0         | 0         | 0         | 0         | 41.3078   | 0          | 21.7006    | 0          | bifunctional methylenetetrahydrofolate dehydrogenase/cyclohydrolase, putative                      |
| PVX_114640 | 0         | 0         | 0         | 0         | 0         | 0         | 0         | 0         | 0         | 0          | 0          | 0          | hypothetical protein, conserved                                                                    |
| PVX_114645 | 0         | 65.0524   | 0         | 0         | 14.7776   | 0         | 0         | 0         | 88.2643   | 81.856     | 37.0966    | 0          | ATP-dependent RNA helicase HAS1, putative (HAS1)                                                   |
| PVX_114650 | 0         | 0         | 167.811   | 0         | 0         | 0         | 0         | 0         | 25.5598   | 0          | 26.8532    | 0          | hypothetical protein, conserved                                                                    |
| PVX_114655 | 15.1896   | 0         | 0         | 0         | 4.81392   | 0         | 0         | 0         | 5.75372   | 10.676     | 18.1399    | 0          | hypothetical protein, conserved                                                                    |
| PVX_114660 | 53.786    | 0         | 66.8288   | 0         | 0         | 0         | 41.093    | 0         | 71.314    | 47.2514    | 53.5283    | 0          | Ran-binding protein, putative                                                                      |
| PVX_114665 | 72.4199   | 0         | 180.193   | 463.221   | 22.9837   | 0         | 110.82    | 0         | 82.3289   | 50.8854    | 43.2463    | 0          | RNA polymerase II transcription factor B subunit 4, putative (TFB4)                                |
| PVX_114670 | 94.1286   | 131.502   | 0         | 0         | 0         | 0         | 0         | 130.778   | 107.024   | 66.1317    | 56.2115    | 152.594    | ER lumen protein retaining receptor, putative (ERD2)                                               |
| PVX_114675 | 297.935   | 208.262   | 0         | 0         | 47.3663   | 0         | 0         | 207.081   | 56.4799   | 261.578    | 59.3111    | 0          | hypothetical protein, conserved                                                                    |
| PVX_114680 | 82.1223   | 114.711   | 613.171   | 262.712   | 78.2073   | 0         | 377.116   | 114.084   | 124.487   | 201.95     | 163.47     | 266.172    | proteasome subunit alpha type-4, putative                                                          |
| PVX_114685 | 437.75    | 152.92    | 272.583   | 350.364   | 34.7634   | 0         | 167.663   | 456.212   | 248.887   | 192.204    | 304.99     | 177.489    | proteasome subunit alpha type-7, putative                                                          |
| PVX_114690 | 0         | 0         | 0         | 0         | 0         | 0         | 0         | 0         | 0         | 29.9488    | 50.9097    | 0          | hypothetical protein, conserved                                                                    |
| PVX_114695 | 0         | 0         | 0         | 0         | 0         | 0         | 0         | 0         | 12.3702   | 22.9479    | 25.9973    | 0          | phosphoinositide phosphatase SAC1, putative                                                        |
| PVX_114700 | 0         | 109.745   | 65.1249   | 0         | 16.6162   | 0         | 0         | 72.7756   | 119.137   | 73.6763    | 62.5974    | 42.4052    | FtsJ-like methyltransferase, putative                                                              |
| PVX_114705 | 0         | 62.966    | 0         | 0         | 85.8657   | 0         | 0         | 0         | 136.658   | 31.6676    | 89.7218    | 0          | V-type proton ATPase 21 kDa proteolipid subunit, putative                                          |
| PVX_114710 | 56.8661   | 198.516   | 141.431   | 181.787   | 0         | 0         | 86.9754   | 315.914   | 258.56    | 79.9195    | 135.83     | 0          | adenylosuccinate synthetase, putative                                                              |
| PVX_114715 | 95.6374   | 133.612   | 0         | 612.128   | 30.3694   | 490.041   | 0         | 132.877   | 72.4937   | 67.1913    | 57.1127    | 0          | 60S ribosomal protein L7, putative                                                                 |
| PVX_114720 | 0         | 0         | 0         | 0         | 0         | 0         | 0         | 0         | 0         | 0          | 0          | 0          | hypothetical protein, conserved                                                                    |
| PVX_114725 | 0         | 0         | 0         | 0         | 0         | 0         | 0         | 0         | 0         | 0          | 0          | 0          | metacaspase 1, putative                                                                            |
| PVX_114730 | 0         | 0         | 0         | 0         | 0         | 0         | 0         | 0         | 0         | 28.4097    | 32.1864    | 0          | hypothetical protein, conserved                                                                    |
| PVX_114735 | 53.8832   | 18.8031   | 0         | 86.0535   | 8.54084   | 0         | 0         | 0         | 10.2061   | 9.46734    | 69.7125    | 43.5933    | DNA replication licensing factor MCM6, putative (MCM6)                                             |
| PVX_114740 | 0         | 0         | 0         | 0         | 0         | 0         | 0         | 0         | 0         | 12.1878    | 0          | 19.2106    | hypothetical protein, conserved                                                                    |
| PVX_114745 | 44.3529   | 30.9617   | 0         | 0         | 0         | 0         | 0         | 61.592    | 0         | 15.5844    | 26.4848    | 0          | histone-lysine N-methyltransferase, putative (SET6)                                                |
| PVX_114747 | 0         | 0         | 0         | 0         | 0         | 0         | 0         | 0         | 0         | 0          | 0          | 0          | tRNA Threonine                                                                                     |
| PVX_114750 | 0         | 66.614    | 118.63    | 0         | 60.5303   | 0         | 72.9509   | 66.2568   | 72.306    | 100.583    | 199.43     | 0          | serine/threonine protein phosphatase 5, putative (PP5)                                             |
| PVX_114755 | 0         | 29.8658   | 0         | 0         | 0         | 0         | 0         | 0         | 0         | 0          | 0          | 0          | hypothetical protein, conserved                                                                    |
| PVX_114760 | 0         | 0         | 0         | 0         | 0         | 0         | 28.0359   | 22.9485   | 7.09635   | 28.1354    | 0          | 0          | NLI interacting factor-like phosphatase, putative (NIF3)                                           |
| PVX_114765 | 0         | 0         | 0         | 0         | 0         | 0         | 0         | 0         | 0         | 0          | 0          | 0          | hypothetical protein                                                                               |
| PVX_114770 | 0         | 0         | 0         | 0         | 0         | 0         | 0         | 679.04    | 0         | 171.306    | 48.5826    | 0          | splicing factor, putative                                                                          |
| PVX_114775 | 80.1369   | 0         | 0         | 0         | 0         | 410.426   | 0         | 0         | 0         | 56.3055    | 15.9517    | 0          | hypothetical protein, conserved                                                                    |
| PVX_114780 | 0         | 0         | 0         | 61.2257   | 0         | 0         | 0         | 0         | 0         | 0          | 0          | 0          | hypothetical protein, conserved                                                                    |
| PVX_114785 | 0         | 23.4674   | 0         | 0         | 0         | 0         | 0         | 0         | 0         | 0          | 0          | 0          | hypothetical protein, conserved                                                                    |
| PVX_114790 | 0         | 57.9948   | 0         | 0         | 0         | 0         | 115.355   | 62.9369   | 116.684   | 49.587     | 0          | 0          | mitochondrial import inner membrane translocase subunit TIM23, putative (TIM23)                    |
| PVX_114795 | 0         | 0         | 0         | 0         | 0         | 0         | 0         | 0         | 0         | 0          | 0          | 0          | ubiquitin-conjugating enzyme, putative                                                             |
| PVX_114800 | 0         | 0         | 0         | 0         | 0         | 0         | 0         | 0         | 11.6596   | 0          | 6.12603    | 0          | hypothetical protein, conserved                                                                    |
| PVX_114805 | 0         | 0         | 0         | 0         | 0         | 0         | 0         | 0         | 0         | 0          | 0          | 0          | hypothetical protein, conserved                                                                    |
| PVX_114810 | 0         | 0         | 0         | 0         | 22.9651   | 0         | 0         | 0         | 0         | 0          | 0          | 0          | hypothetical protein, conserved                                                                    |
| PVX_114815 | 0         | 0         | 0         | 0         | 0         | 0         | 0         | 0         | 0         | 78.0057    | 0          | 0          | DnaJ domain containing protein                                                                     |
| PVX_114820 | 0         | 0         | 0         | 0         | 0         | 0         | 0         | 0         | 0         | 0          | 1.5065     | 0          | protein kinase domain containing protein                                                           |
| PVX_114825 | 134.828   | 0         | 336.066   | 0         | 0         | 0         | 0         | 0         | 0         | 94.7068    | 53.6806    | 0          | protein kinase Crk2                                                                                |
| PVX_114830 | 1311.85   | 1468.65   | 350.616   | 554.662   | 319.937   | 777.02    | 481.008   | 1264.93   | 1536.46   | 1603.62    | 1005.66    | 579.527    | elongation factor 1-alpha, putative                                                                |
| PVX_114832 | 1375.07   | 1257.09   | 467.501   | 885.539   | 404.875   | 405.07    | 438.818   | 1195.35   | 1491.85   | 1400.71    | 1047.57    | 432.578    | elongation factor 1-alpha, putative                                                                |

| Gene ID    | Patient 1 | Patient 2 | Patient 3 | Patient 4 | Patient 5 | Patient 6 | Patient 7 | Patient 8 | Patient 9 | Patient 10 | Patient 11 | Patient 12 | Gene Description                                         |
|------------|-----------|-----------|-----------|-----------|-----------|-----------|-----------|-----------|-----------|------------|------------|------------|----------------------------------------------------------|
| Patient    |           |           |           |           |           |           |           |           |           |            |            |            |                                                          |
| PVX_114835 | 0         | 0         | 0         | 0         | 18.3559   | 0         | 0         | 0         | 65.7688   | 20.3285    | 11.5168    | 0          | glutamate-tRNA ligase, putative                          |
| PVX_114840 | 0         | 0         | 0         | 0         | 0         | 0         | 0         | 0         | 0         | 0          | 0          | 0          | hypothetical protein, conserved                          |
| PVX_114845 | 31.693    | 44.2411   | 78.7674   | 101.243   | 30.1449   | 162.082   | 0         | 44.006    | 48.0259   | 66.8205    | 63.0827    | 51.2883    | hypothetical protein, conserved                          |
| PVX_114850 | 0         | 25.6986   | 0         | 0         | 11.6743   | 0         | 0         | 0         | 13.9482   | 12.937     | 7.32823    | 0          | helicase, putative                                       |
| PVX_114855 | 234.425   | 0         | 0         | 0         | 0         | 0         | 0         | 0         | 0         | 0          | 46.6731    | 0          | hypothetical protein, conserved                          |
| PVX_114860 | 23.652    | 16.5065   | 58.7696   | 75.5393   | 22.4922   | 0         | 0         | 0         | 53.7585   | 16.623     | 23.5386    | 38.267     | hypothetical protein, conserved                          |
| PVX_114865 | 387.206   | 90.1231   | 0         | 206.345   | 20.4771   | 0         | 98.7279   | 179.27    | 244.535   | 113.366    | 205.53     | 0          | T-complex protein 1, delta subunit, putative             |
| PVX_114870 | 345.198   | 241.194   | 0         | 0         | 36.5564   | 0         | 0         | 0         | 43.6162   | 161.666    | 91.6223    | 0          | pyrroline carboxylate reductase, putative                |
| PVX_114875 | 0         | 9.68083   | 34.4624   | 0         | 0         | 0         | 0         | 0         | 21.0203   | 9.75088    | 16.5679    | 0          | hypothetical protein, conserved                          |
| PVX_114880 | 0         | 121.379   | 0         | 0         | 13.786    | 0         | 66.4575   | 120.73    | 16.4692   | 30.5481    | 69.2197    | 0          | hypothetical protein, conserved                          |
| PVX_114885 | 21.1831   | 0         | 0         | 0         | 0         | 0         | 29.4098   | 24.0731   | 14.888    | 16.8651    | 0          | 0          | hypothetical protein, conserved                          |
| PVX_114890 | 0         | 0         | 155.919   | 0         | 19.8882   | 0         | 0         | 0         | 23.751    | 22.0223    | 12.4767    | 0          | rhomboid protease ROM7, putative (ROM7)                  |
| PVX_114892 | 0         | 0         | 0         | 0         | 0         | 0         | 0         | 0         | 0         | 0          | 0          | 0          | conserved Plasmodium protein, unknown function           |
| PVX_114895 | 0         | 32.3912   | 0         | 0         | 14.7163   | 237.398   | 0         | 64.4353   | 17.5796   | 32.6066    | 27.707     | 0          | zinc-finger domain containing protein                    |
| PVX_114900 | 0         | 0         | 0         | 82.0019   | 0         | 0         | 0         | 0         | 0         | 0          | 5.11019    | 41.5408    | hypothetical protein, conserved                          |
| PVX_114905 | 0         | 0         | 0         | 0         | 0         | 0         | 0         | 0         | 0         | 0          | 68.8691    | 0          | hypothetical protein, conserved                          |
| PVX_114910 | 1151.7    | 512.019   | 782.248   | 670.306   | 332.548   | 0         | 962.288   | 727.407   | 952.421   | 1250.44    | 812.833    | 1188.48    | 405 ribosomal protein S15, putative (RPS15)              |
| PVX_114920 | 99.3535   | 0         | 247.396   | 317.99    | 31.5524   | 0         | 0         | 0         | 75.3125   | 139.602    | 39.5548    | 161.088    | GTP-binding protein, putative                            |
| PVX_114922 | 10.17     | 42.5778   | 25.2604   | 0         | 6.4454    | 51.9772   | 0         | 28.2362   | 11.5566   | 17.8703    | 16.1937    | 16.448     | hypothetical protein                                     |
| PVX_114925 | 0         | 0         | 0         | 0         | 0         | 0         | 0         | 0         | 18.4303   | 0          | 9.68249    | 157.515    | hypothetical protein, conserved                          |
| PVX_114930 | 0         | 0         | 305.988   | 0         | 39.0217   | 0         | 0         | 0         | 0         | 0          | 24.446     | 0          | high mobility group protein B4, putative (HMGB4)         |
| PVX_114935 | 0         | 22.3102   | 79.4432   | 0         | 10.1345   | 0         | 0         | 0         | 72.6565   | 78.6254    | 69.9859    | 0          | exosome complex exonuclease RRP44, putative (DIS3)       |
| PVX_114940 | 208.517   | 36.3939   | 129.633   | 0         | 66.1436   | 0         | 0         | 144.793   | 158.01    | 109.896    | 72.6338    | 0          | RNA-binding protein, putative                            |
| PVX_114945 | 0         | 85.4599   | 0         | 0         | 0         | 0         | 0         | 0         | 0         | 0          | 0          | 0          | hypothetical protein, conserved                          |
| PVX_114950 | 15.3987   | 0         | 0         | 49.1686   | 4.88021   | 0         | 23.5209   | 0         | 11.6659   | 27.0573    | 33.7143    | 0          | hypothetical protein, conserved                          |
| PVX_114955 | 9.34486   | 0         | 0         | 0         | 0         | 0         | 0         | 0         | 0         | 0          | 1.85997    | 0          | hypothetical protein, conserved                          |
| PVX_114960 | 218.94    | 0         | 0         | 0         | 0         | 0         | 0         | 0         | 0         | 0          | 0          | 0          | ADP-ribosylation factor-like protein, putative           |
| PVX_114965 | 0         | 0         | 0         | 50.6329   | 0         | 0         | 0         | 0         | 12.0132   | 16.7176    | 12.6247    | 51.2996    | hypothetical protein, conserved                          |
| PVX_114970 | 0         | 0         | 0         | 0         | 86.2896   | 0         | 0         | 0         | 102.671   | 0          | 161.617    | 0          | hypothetical protein, conserved                          |
| PVX_114975 | 0         | 121.095   | 0         | 0         | 0         | 0         | 0         | 240.799   | 131.343   | 60.8121    | 34.4772    | 0          | RNA-binding protein, putative                            |
| PVX_114977 | 0         | 0         | 0         | 0         | 0         | 0         | 240.584   | 217.982   | 59.4517   | 55.0632    | 0          | 0          | hypothetical protein                                     |
| PVX_114980 | 97.7261   | 68.2671   | 0         | 0         | 0         | 0         | 0         | 0         | 0         | 68.658     | 38.9068    | 0          | hypothetical protein, conserved                          |
| PVX_114985 | 0         | 57.8336   | 0         | 0         | 52.5733   | 0         | 0         | 0         | 94.1431   | 0          | 16.4831    | 134.197    | hypothetical protein, conserved                          |
| PVX_114990 | 0         | 0         | 0         | 0         | 0         | 0         | 0         | 0         | 0         | 0          | 0          | 0          | guanylyl cyclase, putative                               |
| PVX_114995 | 0         | 0         | 0         | 0         | 0         | 0         | 0         | 0         | 34.1333   | 10.5538    | 29.89      | 0          | E3 SUMO-protein ligase PIAS, putative (PIAS)             |
| PVX_115000 | 192.237   | 95.8335   | 68.2449   | 175.437   | 69.6486   | 0         | 41.9639   | 152.521   | 301.701   | 202.657    | 218.647    | 133.31     | falciylisin, putative                                    |
| PVX_115005 | 173.646   | 121.284   | 216.118   | 0         | 82.6934   | 0         | 0         | 0         | 164.521   | 30.5006    | 172.828    | 0          | poly(A)-binding protein, putative                        |
| PVX_115010 | 47.9406   | 33.4677   | 0         | 0         | 0         | 0         | 0         | 66.5764   | 18.1637   | 33.6893    | 0          | 0          | protein arginine N-methyltransferase 5, putative (PRMT5) |
| PVX_115015 | 68.7154   | 23.9812   | 85.3963   | 0         | 21.7876   | 0         | 52.5117   | 143.121   | 104.129   | 60.3646    | 102.58     | 0          | protein transport protein Sec24A, putative (SEC24A)      |
| PVX_115020 | 44.8757   | 10.4383   | 0         | 47.7627   | 0         | 0         | 22.8483   | 62.2999   | 11.3324   | 0          | 8.93199    | 0          | hypothetical protein, conserved                          |
| PVX_115025 | 0         | 0         | 0         | 0         | 0         | 0         | 0         | 0         | 0         | 0          | 0          | 0          | hypothetical protein, conserved                          |
| PVX_115030 | 0         | 0         | 0         | 0         | 0         | 0         | 0         | 0         | 0         | 0          | 0          | 0          | actin-depolymerizing factor 2, putative (ADF2)           |
| PVX_115035 | 0         | 0         | 0         | 0         | 0         | 0         | 0         | 0         | 0         | 0          | 0          | 0          | conserved Plasmodium protein, unknown function           |
| PVX_115040 | 450.117   | 0         | 0         | 0         | 0         | 0         | 0         | 0         | 0         | 157.837    | 0          | 0          | hypothetical protein, conserved                          |
| PVX_115045 | 192.146   | 0         | 479.708   | 1233.18   | 0         | 0         | 267.216   | 218.617   | 67.4646   | 67.4646    | 267.774    | 0          | cytochrome c oxidase subunit 2a, putative                |
| PVX_115050 | 0         | 0         | 0         | 0         | 0         | 0         | 0         | 4.44996   | 0         | 4.67659    | 0          | 0          | hypothetical protein, conserved                          |
| PVX_115055 | 92.3796   | 0         | 229.985   | 0         | 58.6652   | 0         | 141.453   | 385.038   | 70.0227   | 194.711    | 165.501    | 0          | proliferating cell nuclear antigen, putative             |
| PVX_115060 | 0         | 0         | 0         | 0         | 0         | 0         | 0         | 0         | 0         | 158.368    | 134.724    | 0          | hypothetical protein, conserved                          |
| PVX_115063 | 0         | 0         | 0         | 0         | 0         | 0         | 0         | 0         | 0         | 0          | 0          | 0          | 14-3-3 protein, putative (14-3-3I)                       |
| PVX_115065 | 0         | 93.2086   | 110.655   | 0         | 28.231    | 0         | 68.0462   | 0         | 0         | 93.8316    | 35.4361    | 0          | RuvB-like helicase 3, putative (RUVB3)                   |
| PVX_115070 | 0         | 0         | 0         | 0         | 0         | 0         | 84.9212   | 0         | 0         | 0          | 33.1568    | 0          | hypothetical protein, conserved                          |
| PVX_115075 | 14.4513   | 90.758    | 0         | 0         | 13.7396   | 147.736   | 0         | 20.0623   | 49.2663   | 25.3927    | 23.0109    | 46.75      | hypothetical protein, conserved                          |
| PVX_115080 | 0         | 0         | 0         | 0         | 0         | 0         | 0         | 0         | 0         | 14.1856    | 24.1072    | 0          | 3'-5' exonuclease domain containing protein              |
| PVX_115085 | 0         | 0         | 377.13    | 0         | 0         | 0         | 0         | 0         | 0         | 0          | 90.32      | 0          | hypothetical protein, conserved                          |
| PVX_115090 | 0         | 0         | 0         | 70.8723   | 7.03422   | 0         | 0         | 0         | 0         | 15.5968    | 0          | 0          | hypothetical protein                                     |
| PVX_115095 | 0         | 0         | 0         | 0         | 0         | 0         | 0         | 0         | 0         | 0          | 2.81901    | 0          | hypothetical protein, conserved                          |
| PVX_115100 | 0         | 0         | 0         | 0         | 0         | 0         | 0         | 0         | 8.38151   | 0          | 0          | 0          | hypothetical protein, conserved                          |
| PVX_115105 | 29.6458   | 0         | 0         | 0         | 9.39873   | 0         | 0         | 0         | 0         | 0          | 17.7023    | 0          | hypothetical protein, conserved                          |
| PVX_115110 | 63.6566   | 22.215    | 0         | 0         | 10.0912   | 0         | 0         | 44.1938   | 0         | 11.1843    | 25.3408    | 0          | hypothetical protein, conserved                          |
| PVX_115115 | 0         | 0         | 0         | 0         | 0         | 0         | 0         | 0         | 81.865    | 126.497    | 43.0027    | 116.668    | bifunctional polynucleotide phosphatase/kinase, putative |
| PVX_115120 | 66.1563   | 0         | 0         | 0         | 20.9926   | 0         | 0         | 0         | 25.0684   | 23.2429    | 0          | 0          | ribosomal protein L9, putative                           |
| PVX_115125 | 72.7365   | 0         | 90.3987   | 0         | 0         | 0         | 0         | 151.5     | 13.7781   | 38.3379    | 115.822    | 0          | polyubiquitin binding protein, putative (DOA1)           |

| Gene ID    | Patient | Patient 1 | Patient 2 | Patient 3 | Patient 4 | Patient 5 | Patient 6 | Patient 7 | Patient 8 | Patient 9 | Patient 10 | Patient 11 | Patient 12 | Gene Description                                                              |                                 |
|------------|---------|-----------|-----------|-----------|-----------|-----------|-----------|-----------|-----------|-----------|------------|------------|------------|-------------------------------------------------------------------------------|---------------------------------|
| PVX_115130 |         | 0         | 0         | 0         | 162.085   | 16.0856   | 0         | 0         | 70.4263   | 0         | 106.908    | 40.376     | 0          | endonuclease/exonuclease/phosphatase domain containing protein                |                                 |
| PVX_115135 |         | 140.767   | 98.3878   | 0         | 0         | 44.7497   | 0         | 0         | 195.665   | 53.3675   | 197.75     | 140.113    | 0          | hypothetical protein, conserved                                               |                                 |
| PVX_115140 |         | 0         | 28.9383   | 103.06    | 0         | 0         | 0         | 0         | 0         | 47.1183   | 29.1334    | 49.5098    | 0          | hypothetical protein, conserved                                               |                                 |
| PVX_115145 |         | 0         | 0         | 0         | 0         | 0         | 0         | 0         | 0         | 0         | 0          | 18.6356    | 0          | nuclear fusion protein, putative (GEX1)                                       |                                 |
| PVX_115155 |         | 511.997   | 417.201   | 637.199   | 273.007   | 81.2712   | 0         | 130.633   | 118.548   | 258.713   | 299.774    | 390.68     | 138.301    | hypothetical protein                                                          |                                 |
| PVX_115160 |         | 38.1349   | 26.6189   | 0         | 0         | 12.0926   | 0         | 0         | 0         | 14.4475   | 13.4       | 22.7717    | 0          | hypothetical protein, conserved                                               |                                 |
| PVX_115165 |         | 0         | 0         | 0         | 0         | 0         | 0         | 0         | 0         | 0         | 0          | 0          | 0          | 6-cysteine protein (P92)                                                      |                                 |
| PVX_115170 |         | 50.5541   | 11.7594   | 0         | 0         | 0         | 0         | 25.7409   | 0         | 6.38326   | 5.92191    | 20.1245    | 0          | hypothetical protein, conserved                                               |                                 |
| PVX_115175 |         | 28.1359   | 19.6369   | 0         | 0         | 0         | 0         | 0         | 39.0655   | 21.3173   | 29.6609    | 11.2004    | 45.5273    | pre-mRNA-splicing factor ATP-dependent RNA helicase PRP16, putative (PRP16)   |                                 |
| PVX_115180 |         | 26.8165   | 6.23714   | 0         | 28.5369   | 5.66496   | 45.6833   | 0         | 0         | 30.4725   | 12.5657    | 28.4665    | 0          | hypothetical protein, conserved                                               |                                 |
| PVX_115185 |         | 0         | 0         | 0         | 0         | 0         | 0         | 0         | 0         | 0         | 20.211     | 45.8006    | 0          | exosome complex component RRP45, putative (RRP45)                             |                                 |
| PVX_115190 |         | 0         | 0         | 0         | 120.762   | 0         | 0         | 0         | 0         | 0         | 0          | 7.52323    | 0          | aldehyde reductase, putative                                                  |                                 |
| PVX_115195 |         | 0         | 0         | 0         | 0         | 0         | 0         | 0         | 0         | 0         | 0          | 38.1567    | 0          | hypothetical protein, conserved                                               |                                 |
| PVX_115200 |         | 95.5353   | 0         | 0         | 0         | 121.348   | 489.516   | 146.299   | 0         | 108.624   | 33.5598    | 0          | 0          | DNA-directed RNA polymerase II 23 kDa polypeptide, putative                   |                                 |
| PVX_115205 |         | 0         | 220.73    | 0         | 0         | 0         | 0         | 0         | 146.338   | 0         | 0          | 36.9939    | 0          | ferrochelatase, putative                                                      |                                 |
| PVX_115210 |         | 0         | 57.514    | 0         | 0         | 26.1412   | 0         | 0         | 0         | 31.2077   | 0          | 16.3921    | 133.454    | hypothetical protein, conserved                                               |                                 |
| PVX_115215 |         | 0         | 91.2021   | 0         | 0         | 82.9528   | 0         | 0         | 0         | 148.419   | 183.341    | 25.9791    | 423.558    | 50S ribosomal protein L17, putative                                           |                                 |
| PVX_115220 |         | 412.847   | 0         | 0         | 0         | 0         | 2135.73   | 0         | 0         | 0         | 144.795    | 411.078    | 675.337    | hypothetical protein, conserved                                               |                                 |
| PVX_115225 |         | 0         | 61.1352   | 0         | 0         | 0         | 224.022   | 0         | 0         | 0         | 15.3861    | 8.71597    | 0          | hypothetical protein, conserved                                               |                                 |
| PVX_115230 |         | 0         | 0         | 0         | 0         | 20.2576   | 0         | 0         | 0         | 48.3834   | 44.8614    | 12.7082    | 0          | ubiquitin-activating enzyme, putative                                         |                                 |
| PVX_115235 |         | 80.2806   | 56.0679   | 199.796   | 0         | 25.4833   | 0         | 0         | 0         | 121.694   | 56.4065    | 127.843    | 130.094    | aminomethyltransferase, mitochondrial precursor, putative                     |                                 |
| PVX_115240 |         | 0         | 0         | 0         | 0         | 0         | 0         | 0         | 0         | 23.7843   | 22.0532    | 0          | 101.667    | hypothetical protein, conserved                                               |                                 |
| PVX_115245 |         | 0         | 52.9757   | 0         | 485.256   | 24.0767   | 0         | 0         | 0         | 0         | 0          | 45.2993    | 0          | SNARE associated Golgi protein, putative                                      |                                 |
| PVX_115250 |         | 0         | 0         | 0         | 0         | 0         | 0         | 0         | 0         | 0         | 0          | 31.0732    | 0          | hypothetical protein, conserved                                               |                                 |
| PVX_115255 |         | 131.655   | 184.017   | 0         | 0         | 251.062   | 0         | 1009.22   | 731.932   | 549.01    | 416.156    | 314.501    | 213.655    | ubiquitin-60S ribosomal protein L40, putative                                 |                                 |
| PVX_115260 |         | 0         | 0         | 0         | 0         | 0         | 0         | 0         | 1676.52   | 455.924   | 0          | 0          | 0          | hypothetical protein, conserved                                               |                                 |
| PVX_115265 |         | 0         | 0         | 0         | 0         | 0         | 0         | 0         | 0         | 0         | 0          | 0          | 0          | hypothetical protein, conserved                                               |                                 |
| PVX_115270 |         | 0         | 135.261   | 0         | 0         | 0         | 0         | 0         | 0         | 73.3452   | 203.705    | 192.507    | 0          | hypothetical protein, conserved                                               |                                 |
| PVX_115275 |         | 15.7493   | 0         | 19.558    | 0         | 4.9904    | 0         | 12.0253   | 21.8629   | 23.8617   | 16.6046    | 23.5102    | 12.7349    | hypothetical protein, conserved                                               |                                 |
| PVX_115280 |         | 28.3498   | 0         | 70.4518   | 90.555    | 26.9627   | 0         | 0         | 157.45    | 53.6985   | 59.7277    | 73.3564    | 0          | hypothetical protein, conserved                                               |                                 |
| PVX_115285 |         | 146.529   | 102.423   | 0         | 0         | 186.352   | 0         | 449.508   | 0         | 111.108   | 205.838    | 291.699    | 475.785    | nucleoside diphosphate kinase A, putative                                     |                                 |
| PVX_115290 |         | 55.7329   | 116.734   | 0         | 0         | 0         | 0         | 0         | 154.807   | 42.2342   | 19.5818    | 44.3743    | 0          | signal recognition particle receptor, putative                                |                                 |
| PVX_115295 |         | 61.0145   | 0         | 0         | 390.143   | 19.3586   | 0         | 93.3326   | 169.487   | 69.3575   | 21.437     | 85.0148    | 0          | hypothetical protein, conserved                                               |                                 |
| PVX_115300 |         | 0         | 0         | 0         | 0         | 0         | 0         | 0         | 0         | 0         | 35.4911    | 20.1123    | 0          | phosphatidylserine synthase, putative                                         |                                 |
| PVX_115305 |         | 34.7445   | 121.256   | 86.3588   | 0         | 11.0166   | 0         | 53.1035   | 96.4888   | 78.9766   | 48.8353    | 76.0725    | 56.2313    | hypothetical protein, conserved                                               |                                 |
| PVX_115310 |         | 313.179   | 0         | 784.558   | 0         | 99.9831   | 0         | 0         | 0         | 237.747   | 0          | 62.3593    | 0          | suppressor of kinetochore protein 1, putative (SKP1)                          |                                 |
| PVX_115315 |         | 0         | 102.323   | 0         | 0         | 0         | 0         | 0         | 67.8491   | 92.5542   | 17.1664    | 68.0735    | 0          | U1 small nuclear ribonucleoprotein 70 kDa, putative                           |                                 |
| PVX_115320 |         | 0         | 0         | 0         | 0         | 0         | 0         | 0         | 0         | 0         | 0          | 0          | 0          | hypothetical protein, conserved                                               |                                 |
| PVX_115325 |         | 0         | 0         | 0         | 0         | 0         | 0         | 0         | 0         | 0         | 0          | 0          | 14.1408    | 115.09                                                                        | hypothetical protein, conserved |
| PVX_115330 |         | 0         | 21.4591   | 0         | 0         | 9.74772   | 0         | 0         | 42.6903   | 0         | 0          | 24.4789    | 0          | hypothetical protein, conserved                                               |                                 |
| PVX_115335 |         | 0         | 0         | 0         | 0         | 0         | 0         | 0         | 0         | 0         | 24.1532    | 13.6845    | 0          | oxidoreductase NAD-binding domain containing protein                          |                                 |
| PVX_115340 |         | 0         | 0         | 0         | 0         | 0         | 0         | 0         | 0         | 79.5547   | 221.183    | 83.563     | 0          | ribosome biogenesis protein MRT4, putative                                    |                                 |
| PVX_115345 |         | 25.204    | 123.13    | 62.6288   | 0         | 15.9794   | 0         | 38.5102   | 69.9875   | 47.7389   | 141.709    | 130.433    | 40.7798    | alanine-tRNA ligase, putative                                                 |                                 |
| PVX_115350 |         | 0         | 0         | 0         | 0         | 0         | 0         | 0         | 0         | 0         | 0          | 0          | 0          | hypothetical protein, conserved                                               |                                 |
| PVX_115355 |         | 0         | 0         | 0         | 0         | 0         | 0         | 0         | 0         | 0         | 0          | 64.8144    | 264.41     | hypothetical protein, conserved                                               |                                 |
| PVX_115360 |         | 0         | 0         | 0         | 0         | 0         | 0         | 0         | 0         | 0         | 0          | 0          | 0          | hypothetical protein                                                          |                                 |
| PVX_115365 |         | 0         | 50.9442   | 0         | 0         | 0         | 0         | 223.269   | 506.671   | 55.2888   | 102.517    | 145.212    | 118.193    | 26S proteasome regulatory subunit RPN11, putative                             |                                 |
| PVX_115370 |         | 0         | 75.4256   | 134.335   | 0         | 51.4066   | 0         | 0         | 61.4005   | 75.9168   | 64.5124    | 87.47      | 0          | RNase L inhibitor, putative                                                   |                                 |
| PVX_115375 |         | 0         | 0         | 297.389   | 0         | 75.8512   | 0         | 548.782   | 165.879   | 0         | 41.9251    | 47.5223    | 580.921    | hypothetical protein, conserved                                               |                                 |
| PVX_115380 |         | 173.142   | 120.932   | 0         | 0         | 54.9686   | 0         | 0         | 120.269   | 98.4259   | 30.4122    | 17.2326    | 0          | hypothetical protein, conserved                                               |                                 |
| PVX_115385 |         | 0         | 0         | 0         | 127.217   | 0         | 0         | 0         | 110.574   | 30.1681   | 27.9801    | 55.4742    | 0          | hypothetical protein, conserved                                               |                                 |
| PVX_115390 |         | 1086.8    | 0         | 0         | 0         | 353.3     | 0         | 0         | 0         | 0         | 0          | 216.608    | 0          | mitochondrial import inner membrane translocase subunit TIM9, putative (TIM9) |                                 |
| PVX_115395 |         | 47.8381   | 0         | 0         | 0         | 0         | 0         | 0         | 0         | 18.1248   | 16.8087    | 19.0441    | 77.4507    | mitochondrial carrier protein, putative                                       |                                 |
| PVX_115400 |         | 0         | 0         | 0         | 0         | 0         | 0         | 0         | 52.9865   | 7.22861   | 13.412     | 41.7804    | 30.8703    | DNA repair endonuclease, putative                                             |                                 |
| PVX_115405 |         | 73.6113   | 102.811   | 0         | 0         | 23.3625   | 0         | 0         | 0         | 83.684    | 25.8611    | 43.9578    | 0          | hypothetical protein, conserved                                               |                                 |
| PVX_115410 |         | 0         | 30.1251   | 0         | 0         | 0         | 0         | 0         | 119.856   | 16.3501   | 0          | 25.7696    | 0          | glycosylphosphatidylinositol anchor attachment 1 protein, putative (GPA1)     |                                 |
| PVX_115415 |         | 0         | 54.0769   | 0         | 0         | 0         | 396.544   | 0         | 0         | 29.3436   | 27.2031    | 61.6534    | 0          | hypothetical protein, conserved                                               |                                 |
| PVX_115420 |         | 0         | 0         | 0         | 0         | 0         | 0         | 0         | 0         | 10.0208   | 0          | 15.7965    | 0          | hypothetical protein, conserved                                               |                                 |
| PVX_115425 |         | 0         | 0         | 0         | 0         | 0         | 0         | 0         | 0         | 0         | 0          | 0          | 132.355    | hypothetical protein, conserved                                               |                                 |
| PVX_115430 |         | 11.8743   | 8.28567   | 0         | 0         | 3.76291   | 0         | 18.1354   | 0         | 4.49779   | 4.17296    | 16.544     | 0          | hypothetical protein, conserved                                               |                                 |
| PVX_115435 |         | 0         | 58.6891   | 69.6568   | 0         | 17.7723   | 0         | 0         | 0         | 31.8557   | 39.3992    | 44.6334    | 0          | hypothetical protein, conserved                                               |                                 |
| PVX_115440 |         | 0         | 78.5228   | 0         | 0         | 0         | 143.83    | 0         | 39.0532   | 10.6553   | 39.5354    | 27.9923    | 0          | hypothetical protein, conserved                                               |                                 |

| Gene ID     | Patient 1 | Patient 2 | Patient 3 | Patient 4 | Patient 5 | Patient 6 | Patient 7 | Patient 8 | Patient 9 | Patient 10 | Patient 11 | Patient 12 | Gene Description                                                               |
|-------------|-----------|-----------|-----------|-----------|-----------|-----------|-----------|-----------|-----------|------------|------------|------------|--------------------------------------------------------------------------------|
| Patient     |           |           |           |           |           |           |           |           |           |            |            |            |                                                                                |
| PVX_115445  | 0         | 0         | 0         | 0         | 87.0847   | 0         | 0         | 0         | 0         | 0          | 0          | 0          | U2 small nuclear ribonucleoprotein A', putative                                |
| PVX_115446  | 0         | 0         | 0         | 0         | 0         | 0         | 0         | 0         | 0         | 0          | 0          | 0          | tRNA Arginine                                                                  |
| PVX_115447  | 0         | 0         | 0         | 0         | 0         | 0         | 0         | 0         | 0         | 0          | 0          | 0          | tRNA Tryptophan                                                                |
| PVX_115448  | 0         | 0         | 0         | 0         | 0         | 0         | 0         | 0         | 0         | 0          | 0          | 0          | tRNA Arginine                                                                  |
| PVX_115449  | 0         | 0         | 0         | 0         | 0         | 0         | 0         | 0         | 0         | 0          | 0          | 0          | tRNA Glycine                                                                   |
| PVX_115449a | 0         | 0         | 0         | 0         | 0         | 0         | 0         | 0         | 0         | 0          | 0          | 0          | tRNA Cysteine                                                                  |
| PVX_115450  | 90.8787   | 1142.61   | 0         | 290.796   | 259.694   | 1862.36   | 417.443   | 126.259   | 585.517   | 702.344    | 578.885    | 294.625    | hypothetical protein, conserved                                                |
| PVX_115455  | 0         | 0         | 0         | 0         | 0         | 0         | 0         | 0         | 53.1166   | 0          | 0          | 0          | Plasmodium exported protein, unknown function                                  |
| PVX_115460  | 89.5151   | 62.5247   | 0         | 286.422   | 56.8421   | 458.587   | 0         | 0         | 33.9251   | 220.122    | 89.0936    | 0          | Plasmodium exported protein, unknown function                                  |
| PVX_115465  | 0         | 104.434   | 123.991   | 0         | 31.6327   | 0         | 0         | 0         | 94.4629   | 52.5607    | 39.7011    | 0          | tryptophan-rich antigen (Pv-fam-a)                                             |
| PVX_115470  | 109.774   | 664.065   | 90.9537   | 0         | 23.2053   | 374.32    | 167.788   | 152.429   | 152.488   | 128.576    | 80.1161    | 0          | Pv-fam-d protein                                                               |
| PVX_115475  | 0         | 0         | 0         | 0         | 31.5524   | 0         | 0         | 0         | 0         | 0          | 0          | 0          | variable surface protein Vir14, putative,PIR protein                           |
| PVX_115480  | 0         | 0         | 0         | 0         | 0         | 0         | 0         | 0         | 0         | 0          | 0          | 0          | variable surface protein Vir21, putative,PIR protein                           |
| PVX_115490  | 0         | 0         | 0         | 0         | 0         | 0         | 0         | 0         | 0         | 0          | 0          | 0          | VIR protein,PIR protein                                                        |
| PVX_115985  | 0         | 0         | 0         | 0         | 0         | 0         | 0         | 0         | 0         | 20.6624    | 0          | 0          | variable surface protein Vir, putative                                         |
| PVX_115990  | 0         | 0         | 0         | 0         | 0         | 0         | 0         | 0         | 0         | 0          | 0          | 0          | hypothetical protein                                                           |
| PVX_116485  | 0         | 0         | 0         | 0         | 0         | 0         | 0         | 0         | 0         | 0          | 0          | 0          | conserved Plasmodium protein, unknown function                                 |
| PVX_116490  | 0         | 63.9858   | 0         | 0         | 29.0704   | 0         | 70.0702   | 0         | 34.727    | 128.824    | 45.6108    | 0          | ribose-phosphate pyrophosphokinase, putative                                   |
| PVX_116495  | 0         | 0         | 0         | 0         | 0         | 0         | 0         | 0         | 0         | 28.85      | 0          | 0          | mRNA decay protein, putative                                                   |
| PVX_116500  | 0         | 0         | 0         | 0         | 0         | 0         | 0         | 295.855   | 80.6773   | 224.017    | 169.383    | 0          | nicotinate-nucleotide adenyltransferase, putative (NMNAT)                      |
| PVX_116505  | 0         | 0         | 0         | 0         | 11.6599   | 0         | 0         | 0         | 0         | 0          | 0          | 0          | hypothetical protein, conserved                                                |
| PVX_116510  | 0         | 0         | 0         | 0         | 0         | 0         | 108.016   | 196.109   | 133.75    | 49.6015    | 56.2062    | 0          | hypothetical protein, conserved                                                |
| PVX_116515  | 0         | 0         | 0         | 0         | 0         | 0         | 0         | 0         | 0         | 0          | 3.97273    | 0          | hypothetical protein, conserved                                                |
| PVX_116520  | 0         | 0         | 0         | 0         | 0         | 0         | 0         | 0         | 35.8092   | 16.6046    | 18.8128    | 0          | ribonuclease P protein subunit RPR2, putative                                  |
| PVX_116525  | 0         | 0         | 0         | 0         | 0         | 0         | 0         | 138.045   | 0         | 0          | 0          | 0          | hypothetical protein, conserved                                                |
| PVX_116530  | 30.1248   | 0         | 0         | 96.2295   | 9.5507    | 0         | 0         | 0         | 22.8245   | 63.5145    | 23.9845    | 0          | hypothetical protein, conserved                                                |
| PVX_116535  | 0         | 0         | 0         | 0         | 0         | 0         | 35.0163   | 0         | 17.3641   | 16.108     | 9.12366    | 0          | hypothetical protein, conserved                                                |
| PVX_116540  | 0         | 126.187   | 224.866   | 0         | 28.6798   | 0         | 138.303   | 0         | 0         | 0          | 35.9612    | 0          | hypothetical protein, conserved                                                |
| PVX_116545  | 0         | 0         | 0         | 0         | 39.3348   | 0         | 0         | 0         | 0         | 0          | 24.6769    | 0          | hypothetical protein, conserved                                                |
| PVX_116550  | 0         | 0         | 0         | 0         | 2.31945   | 0         | 0         | 10.1615   | 11.0906   | 2.57255    | 13.1127    | 11.8378    | hypothetical protein, conserved                                                |
| PVX_116555  | 0         | 0         | 0         | 0         | 0         | 0         | 0         | 0         | 0         | 0          | 0          | 0          | hypothetical protein, conserved                                                |
| PVX_116557  | 217.084   | 0         | 0         | 0         | 91.8602   | 0         | 110.73    | 100.514   | 109.683   | 50.8443    | 129.634    | 0          | translation initiation factor EIF-2B gamma subunit, putative                   |
| PVX_116560  | 56.9023   | 79.457    | 141.521   | 181.903   | 18.052    | 0         | 0         | 0         | 43.1208   | 39.9852    | 67.9582    | 0          | RNA-binding protein, putative                                                  |
| PVX_116565  | 0         | 0         | 0         | 0         | 0         | 0         | 0         | 0         | 0         | 0          | 0          | 0          | hypothetical protein, conserved                                                |
| PVX_116570  | 0         | 0         | 0         | 0         | 0         | 0         | 0         | 0         | 0         | 0          | 0          | 0          | TBC domain containing protein                                                  |
| PVX_116575  | 0         | 0         | 0         | 0         | 0         | 0         | 0         | 0         | 0         | 0          | 0          | 0          | WD domain, G-beta repeat domain containing protein                             |
| PVX_116580  | 0         | 0         | 0         | 0         | 0         | 0         | 0         | 0         | 99.5268   | 46.104     | 104.526    | 0          | hypothetical protein, conserved                                                |
| PVX_116582  | 0         | 0         | 0         | 0         | 0         | 0         | 0         | 0         | 14.9642   | 0          | 62.8954    | 127.867    | conserved Plasmodium protein, unknown function                                 |
| PVX_116585  | 0         | 9.32515   | 0         | 0         | 0         | 0         | 0         | 0         | 0         | 0          | 0          | 0          | hypothetical protein, conserved                                                |
| PVX_116590  | 0         | 0         | 0         | 0         | 0         | 0         | 0         | 0         | 6.75335   | 0          | 0          | 0          | hypothetical protein, conserved                                                |
| PVX_116595  | 0         | 0         | 0         | 0         | 108.393   | 0         | 0         | 0         | 128.812   | 357.134    | 67.563     | 0          | hypothetical protein                                                           |
| PVX_116600  | 158.463   | 0         | 0         | 0         | 50.3974   | 0         | 0         | 0         | 120.168   | 0          | 0          | 0          | mitochondrial fission 1 protein, putative (FIS1)                               |
| PVX_116603  | 0         | 42.1418   | 0         | 0         | 0         | 0         | 0         | 0         | 22.8696   | 21.2057    | 84.0973    | 0          | hypothetical protein, conserved                                                |
| PVX_116604  | 0         | 0         | 0         | 33.0202   | 0         | 0         | 0         | 0         | 0         | 7.26955    | 6.17579    | 16.7275    | hypothetical protein, conserved                                                |
| PVX_116610  | 264.868   | 92.554    | 330.076   | 0         | 84.1844   | 0         | 0         | 184.068   | 150.617   | 604.67     | 263.636    | 214.925    | hypothetical protein                                                           |
| PVX_116615  | 0         | 0         | 0         | 0         | 0         | 0         | 0         | 0         | 83.9901   | 155.665    | 308.767    | 0          | lactate/malate dehydrogenase, putative                                         |
| PVX_116620  | 295.905   | 206.643   | 0         | 473.198   | 117.393   | 378.805   | 566.034   | 308.278   | 560.662   | 519.787    | 323.956    | 0          | phosphoribosylpyrophosphate synthetase, putative                               |
| PVX_116625  | 295.594   | 0         | 0         | 0         | 0         | 0         | 0         | 0         | 112.185   | 207.465    | 0          | 0          | U6 snRNA-associated Sm-like protein Lsm6, putative                             |
| PVX_116630  | 3710.15   | 2007.08   | 4472.8    | 2299.64   | 1292.93   | 1227.38   | 3118.12   | 5488.67   | 4083.07   | 4497.97    | 3692.83    | 2524.08    | lactate dehydrogenase                                                          |
| PVX_116635  | 203.77    | 106.694   | 126.677   | 162.824   | 48.4768   | 0         | 155.801   | 141.494   | 115.808   | 214.79     | 223.08     | 0          | dihydrofolate synthase/folypolyglutamate synthase, putative                    |
| PVX_116640  | 0         | 0         | 0         | 0         | 0         | 0         | 0         | 0         | 270.71    | 0          | 0          | 0          | VAMP-like protein YKT62, putative                                              |
| PVX_116645  | 30.9692   | 0         | 0         | 0         | 0         | 0         | 0         | 0         | 0         | 0          | 6.16419    | 0          | hypothetical protein, conserved                                                |
| PVX_116650  | 26.6766   | 18.618    | 0         | 0         | 0         | 0         | 0         | 0         | 10.1057   | 9.37423    | 37.1682    | 0          | DEAD box helicase, putative                                                    |
| PVX_116652  | 0         | 0         | 0         | 0         | 0         | 0         | 0         | 0         | 91.8235   | 254.877    | 144.565    | 0          | MSF1-like protein, putative                                                    |
| PVX_116655  | 0         | 0         | 0         | 0         | 4.32274   | 0         | 0         | 9.46907   | 0         | 4.79451    | 13.5768    | 0          | hypothetical protein, conserved                                                |
| PVX_116660  | 0         | 50.6549   | 0         | 0         | 0         | 0         | 111       | 100.759   | 54.975    | 25.484     | 231.021    | 117.521    | Micro-fibrillar-associated protein 1 C-terminus domain containing protein      |
| PVX_116665  | 69.334    | 0         | 0         | 0         | 0         | 0         | 0         | 0         | 0         | 0          | 69.0057    | 0          | hypothetical protein, conserved                                                |
| PVX_116670  | 74.9368   | 0         | 0         | 79.7802   | 7.91827   | 0         | 38.1659   | 104.043   | 0         | 26.3332    | 44.7465    | 40.4154    | hypothetical protein, conserved                                                |
| PVX_116675  | 90.0556   | 125.805   | 0         | 0         | 0         | 0         | 137.884   | 125.114   | 68.2601   | 126.543    | 161.337    | 0          | hypothetical protein, conserved                                                |
| PVX_116680  | 29.0115   | 0         | 0         | 0         | 0         | 0         | 0         | 80.5632   | 32.9712   | 40.7784    | 69.2942    | 46.9453    | vacuolar protein sorting-associated protein 52, putative (VPS52)               |
| PVX_116685  | 0         | 0         | 0         | 0         | 0         | 0         | 0         | 0         | 0         | 0          | 0          | 0          | glideosome associated protein with multiple membrane spans 1, putative (GAPM1) |
| PVX_116690  | 192.355   | 44.7707   | 0         | 205.013   | 20.3448   | 0         | 98.09     | 0         | 97.1829   | 45.0542    | 38.2884    | 0          | hypothetical protein, conserved                                                |



| Gene ID    | Patient 1 | Patient 2 | Patient 3 | Patient 4 | Patient 5 | Patient 6 | Patient 7 | Patient 8 | Patient 9 | Patient 10 | Patient 11 | Patient 12 | Gene Description                                                     |
|------------|-----------|-----------|-----------|-----------|-----------|-----------|-----------|-----------|-----------|------------|------------|------------|----------------------------------------------------------------------|
| Patient    |           |           |           |           |           |           |           |           |           |            |            |            |                                                                      |
| PVX_116695 | 127.143   | 44.3888   | 0         | 0         | 0         | 0         | 0         | 0         | 24.0885   | 0          | 37.962     | 0          | plasmepsin V, putative (PMV)                                         |
| PVX_116700 | 1285.34   | 749.358   | 2140.64   | 2063.6    | 409.348   | 1101.59   | 1646.5    | 1191.94   | 1056.35   | 977.702    | 1364.8     | 1045.38    | 60S ribosomal protein L23, putative (RPL23)                          |
| PVX_116705 | 0         | 127.086   | 0         | 0         | 0         | 0         | 0         | 0         | 0         | 31.9572    | 54.3257    | 0          | N-acetyltransferase, putative                                        |
| PVX_116710 | 277.603   | 97.012    | 0         | 0         | 44.1229   | 0         | 425.699   | 0         | 0         | 194.991    | 138.157    | 225.299    | vacuolar ATP synthase subunit g, putative                            |
| PVX_116715 | 1452.2    | 677.552   | 0         | 777.771   | 385.67    | 1245.63   | 372.38    | 1010.28   | 1652.82   | 1189.43    | 1156.52    | 394.006    | 60S ribosomal protein L9, putative                                   |
| PVX_116720 | 0         | 0         | 0         | 0         | 0         | 0         | 0         | 238.031   | 0         | 0          | 0          | 0          | beta-hydroxyacyl-ACP dehydratase precursor, putative (Fab2)          |
| PVX_116725 | 0         | 0         | 0         | 0         | 0         | 0         | 0         | 0         | 0         | 0          | 0          | 0          | hypothetical protein, conserved                                      |
| PVX_116730 | 0         | 0         | 0         | 0         | 0         | 0         | 0         | 0         | 0         | 0          | 0          | 0          | hypothetical protein, conserved                                      |
| PVX_116735 | 0         | 0         | 0         | 0         | 0         | 0         | 0         | 0         | 0         | 0          | 20.0444    | 0          | hypothetical protein, conserved                                      |
| PVX_116740 | 0         | 0         | 0         | 0         | 0         | 0         | 0         | 0         | 0         | 0          | 0          | 0          | hypothetical protein, conserved                                      |
| PVX_116745 | 155.843   | 36.267    | 0         | 0         | 16.4782   | 0         | 79.4405   | 0         | 19.6825   | 91.2614    | 51.7006    | 0          | palmitoyltransferase, putative (DHHC5)                               |
| PVX_116750 | 0         | 0         | 0         | 0         | 0         | 0         | 0         | 0         | 0         | 0          | 0          | 0          | hypothetical protein                                                 |
| PVX_116755 | 0         | 14.6409   | 0         | 0         | 0         | 0         | 0         | 0         | 0         | 0          | 8.35152    | 0          | hypothetical protein, conserved                                      |
| PVX_116760 | 9.23779   | 0         | 0         | 0         | 8.7817    | 0         | 14.1076   | 0         | 0         | 6.49294    | 22.0639    | 14.9399    | hypothetical protein, conserved                                      |
| PVX_116765 | 0         | 14.0917   | 0         | 0         | 0         | 0         | 0         | 0         | 0         | 3.54866    | 0          | 0          | variant-silencing SET protein, putative (SETvs)                      |
| PVX_116770 | 0         | 0         | 0         | 0         | 0         | 0         | 91.0318   | 0         | 45.1002   | 62.729     | 94.7689    | 0          | nucleoside-diphosphatase mig-23, putative                            |
| PVX_116775 | 122.614   | 42.8063   | 152.495   | 0         | 19.4515   | 0         | 93.781    | 0         | 116.15    | 43.0795    | 24.4064    | 99.2948    | hypothetical protein, conserved                                      |
| PVX_116780 | 154.364   | 0         | 0         | 0         | 98.177    | 0         | 0         | 214.593   | 58.5279   | 54.209     | 92.1898    | 0          | protein transport protein SFT2, putative                             |
| PVX_116785 | 24.8472   | 17.3408   | 0         | 0         | 0         | 0         | 0         | 68.9962   | 75.3005   | 43.6572    | 54.4017    | 0          | splicing factor 1, putative (SF1)                                    |
| PVX_116790 | 0         | 79.7615   | 142.064   | 0         | 0         | 0         | 0         | 0         | 0         | 20.0691    | 22.7395    | 0          | hypothetical protein, conserved                                      |
| PVX_116795 | 0         | 0         | 0         | 0         | 0         | 0         | 0         | 0         | 0         | 0          | 0          | 0          | hypothetical protein                                                 |
| PVX_116800 | 0         | 194.748   | 0         | 0         | 0         | 0         | 0         | 387.134   | 0         | 0          | 55.3796    | 0          | hypothetical protein, conserved                                      |
| PVX_116805 | 51.0587   | 0         | 126.966   | 0         | 0         | 0         | 0         | 70.9087   | 38.6909   | 35.8799    | 30.4894    | 0          | hypothetical protein, conserved                                      |
| PVX_116810 | 0         | 0         | 0         | 0         | 0         | 0         | 0         | 0         | 0         | 12.8734    | 0          | 0          | hypothetical protein, conserved                                      |
| PVX_116815 | 0         | 0         | 0         | 0         | 0         | 0         | 0         | 0         | 0         | 0          | 0          | 0          | hypothetical protein, conserved                                      |
| PVX_116820 | 109.572   | 0         | 0         | 0         | 0         | 561.674   | 0         | 152.257   | 0         | 76.9755    | 109.058    | 177.707    | DnaJ domain containing protein                                       |
| PVX_116825 | 0         | 0         | 0         | 139.181   | 0         | 0         | 0         | 0         | 66.0051   | 15.3038    | 86.693     | 0          | hypothetical protein, conserved                                      |
| PVX_116830 | 73.7326   | 0         | 0         | 0         | 0         | 0         | 0         | 0         | 27.9406   | 25.9037    | 29.3535    | 119.461    | dihydroorotase, putative                                             |
| PVX_116835 | 303.617   | 212.657   | 0         | 0         | 193.815   | 0         | 936.11    | 422.702   | 115.236   | 426.175    | 241.818    | 0          | hypothetical protein, conserved                                      |
| PVX_116840 | 0         | 0         | 158.025   | 0         | 20.1568   | 0         | 0         | 0         | 0         | 22.3193    | 37.9351    | 0          | hypothetical protein, conserved                                      |
| PVX_116845 | 90.1014   | 0         | 0         | 0         | 28.5655   | 0         | 45.8968   | 41.7014   | 0         | 21.1076    | 53.802     | 48.6009    | DNA-directed RNA polymerase, alpha subunit, putative                 |
| PVX_116850 | 0         | 0         | 155.809   | 0         | 19.8742   | 0         | 0         | 0         | 23.7343   | 0          | 49.872     | 0          | protein disulfide isomerase, putative                                |
| PVX_116855 | 0         | 0         | 0         | 0         | 0         | 0         | 0         | 0         | 74.31     | 0          | 0          | 0          | hypothetical protein, conserved                                      |
| PVX_116860 | 0         | 0         | 0         | 95.5535   | 0         | 0         | 0         | 0         | 0         | 0          | 11.908     | 0          | M1-family alanyl aminopeptidase, putative                            |
| PVX_116865 | 64.395    | 44.9642   | 160.19    | 0         | 40.8656   | 0         | 0         | 0         | 73.202    | 45.2486    | 25.6358    | 208.61     | hypothetical protein, conserved                                      |
| PVX_116870 | 19.6743   | 13.7298   | 0         | 0         | 0         | 0         | 0         | 27.3146   | 0         | 6.91384    | 19.5798    | 0          | histone deacetylase, putative (HDA1)                                 |
| PVX_116875 | 120.651   | 168.612   | 300.607   | 0         | 0         | 618.671   | 0         | 0         | 0         | 0          | 48.0349    | 195.736    | hypothetical protein, conserved                                      |
| PVX_116880 | 0         | 449.615   | 0         | 0         | 0         | 0         | 329.301   | 297.984   | 0         | 0          | 42.6499    | 0          | pre-mRNA-splicing factor ISY1, putative                              |
| PVX_116885 | 0         | 0         | 0         | 0         | 0         | 0         | 23.5452   | 0         | 0         | 0          | 0          | 0          | hypothetical protein, conserved                                      |
| PVX_116890 | 0         | 0         | 0         | 0         | 0         | 0         | 0         | 0         | 0         | 35.3714    | 0          | 0          | hypothetical protein                                                 |
| PVX_116892 | 0         | 27.9412   | 0         | 0         | 0         | 0         | 0         | 0         | 0         | 0          | 0          | 0          | conserved Plasmodium protein, unknown function                       |
| PVX_116894 | 0         | 0         | 0         | 0         | 0         | 0         | 0         | 0         | 0         | 0          | 0          | 0          | conserved Plasmodium protein, unknown function                       |
| PVX_116895 | 0         | 0         | 0         | 0         | 0         | 0         | 0         | 0         | 0         | 0          | 0          | 0          | hypothetical protein, conserved                                      |
| PVX_116900 | 0         | 0         | 0         | 0         | 0         | 0         | 0         | 0         | 0         | 49.5234    | 42.0882    | 0          | diacylglycerol kinase, putative                                      |
| PVX_116905 | 0         | 0         | 160.19    | 0         | 20.4328   | 0         | 0         | 89.4416   | 0         | 0          | 38.4538    | 0          | hypothetical protein, conserved                                      |
| PVX_116910 | 0         | 0         | 0         | 0         | 0         | 0         | 0         | 0         | 18.8926   | 0          | 19.8506    | 0          | sulfate transporter, putative                                        |
| PVX_116915 | 0         | 0         | 0         | 0         | 70.2156   | 0         | 0         | 307.15    | 0         | 77.6406    | 0          | 0          | exported protein 2, putative (EXP2)                                  |
| PVX_116920 | 0         | 0         | 124.687   | 0         | 0         | 0         | 76.6765   | 0         | 0         | 35.2368    | 19.9618    | 0          | RNA 3'-terminal phosphate cyclase-like protein, putative             |
| PVX_116925 | 131.849   | 0         | 0         | 844.761   | 0         | 0         | 202.143   | 183.253   | 149.951   | 324.153    | 551.188    | 0          | proteasome subunit beta type-2, putative                             |
| PVX_116930 | 0         | 0         | 127.558   | 0         | 16.2728   | 0         | 0         | 19.4461   | 0         | 36.0776    | 35.7611    | 0          | conserved Plasmodium protein, unknown function                       |
| PVX_116935 | 138.267   | 32.1742   | 0         | 147.291   | 29.2353   | 0         | 70.4677   | 64.0037   | 34.9238   | 16.1942    | 36.6954    | 0          | hypothetical protein, conserved                                      |
| PVX_116940 | 0         | 0         | 0         | 0         | 0         | 0         | 0         | 82.9329   | 135.752   | 0          | 47.5426    | 0          | hypothetical protein, conserved                                      |
| PVX_116945 | 61.281    | 0         | 0         | 0         | 0         | 0         | 0         | 0         | 0         | 0          | 6.09876    | 0          | cyclic nucleotide phosphodiesterase, putative                        |
| PVX_116950 | 0         | 0         | 0         | 0         | 0         | 0         | 0         | 0         | 52.1362   | 0          | 0          | 0          | mitochondrial pyruvate carrier protein 2, putative (MPC2)            |
| PVX_116955 | 0         | 0         | 0         | 0         | 0         | 0         | 0         | 0         | 0         | 66.622     | 18.8762    | 0          | hypothetical protein, conserved                                      |
| PVX_116960 | 261.098   | 182.776   | 0         | 0         | 0         | 0         | 0         | 0         | 99.0696   | 0          | 103.971    | 0          | hypothetical protein, conserved                                      |
| PVX_116965 | 0         | 19.2809   | 0         | 88.223    | 0         | 0         | 0         | 0         | 15.6995   | 14.5654    | 10.9992    | 0          | hypothetical protein, conserved                                      |
| PVX_116967 | 0         | 0         | 0         | 0         | 210.414   | 0         | 0         | 0         | 0         | 457.943    | 260.412    | 0          | autophagy-related protein 12, putative (ATG12)                       |
| PVX_116970 | 0         | 45.2575   | 0         | 0         | 0         | 0         | 0         | 0         | 0         | 22.7717    | 12.9015    | 0          | hypothetical protein, conserved                                      |
| PVX_116975 | 0         | 400.746   | 0         | 0         | 182.582   | 0         | 0         | 0         | 217.182   | 100.421    | 113.948    | 0          | hypothetical protein, conserved                                      |
| PVX_116980 | 0         | 0         | 0         | 268.642   | 0         | 0         | 0         | 0         | 127.292   | 29.4994    | 66.8605    | 0          | hypothetical protein, conserved                                      |
| PVX_116985 | 0         | 0         | 0         | 0         | 0         | 0         | 0         | 0         | 0         | 3.50125    | 1.98297    | 0          | biotin carboxylase subunit of acetyl CoA carboxylase, putative (ACC) |

| Gene ID    | Patient 1 | Patient 2 | Patient 3 | Patient 4 | Patient 5 | Patient 6 | Patient 7 | Patient 8 | Patient 9 | Patient 10 | Patient 11 | Patient 12 | Gene Description                                                                                |                                                                                   |
|------------|-----------|-----------|-----------|-----------|-----------|-----------|-----------|-----------|-----------|------------|------------|------------|-------------------------------------------------------------------------------------------------|-----------------------------------------------------------------------------------|
| Patient    |           |           |           |           |           |           |           |           |           |            |            |            |                                                                                                 |                                                                                   |
| PVX_116990 | 0         | 0         | 0         | 0         | 0         | 0         | 0         | 0         | 19.0841   | 17.6977    | 0          | 0          | hypothetical protein, conserved                                                                 |                                                                                   |
| PVX_116995 | 0         | 0         | 0         | 0         | 0         | 0         | 0         | 0         | 0         | 0          | 0          | 0          | hypothetical protein, conserved                                                                 |                                                                                   |
| PVX_117000 | 89.6388   | 0         | 111.432   | 0         | 0         | 0         | 0         | 0         | 118.865   | 78.7411    | 80.2902    | 72.5572    | hypothetical protein, conserved                                                                 |                                                                                   |
| PVX_117005 | 0         | 0         | 0         | 0         | 0         | 0         | 0         | 0         | 0         | 0          | 18.7175    | 0          | shewanella-like protein phosphatase 1, putative (SHLP1)                                         |                                                                                   |
| PVX_117010 | 92.3796   | 64.5278   | 0         | 0         | 0         | 0         | 141.453   | 0         | 0         | 32.4518    | 36.778     | 0          | hypothetical protein, conserved                                                                 |                                                                                   |
| PVX_117015 | 0         | 385.885   | 0         | 0         | 0         | 1419.67   | 0         | 0         | 0         | 96.7152    | 164.604    | 0          | translation initiation factor EF-1, putative                                                    |                                                                                   |
| PVX_117020 | 77.1576   | 26.9289   | 0         | 0         | 12.2335   | 0         | 0         | 107.141   | 73.0787   | 40.6677    | 15.3578    | 0          | hypothetical protein, conserved                                                                 |                                                                                   |
| PVX_117025 | 29.9434   | 188.09    | 74.4153   | 0         | 18.9863   | 0         | 0         | 41.5758   | 79.4045   | 73.6541    | 53.64      | 0          | splicing factor UZAF large subunit, putative (UZAF2)                                            |                                                                                   |
| PVX_117030 | 386.092   | 449.318   | 0         | 205.751   | 102.091   | 329.41    | 0         | 178.754   | 560.811   | 519.985    | 307.409    | 104.23     | RNA helicase-1, putative                                                                        |                                                                                   |
| PVX_117035 | 0         | 0         | 0         | 0         | 0         | 0         | 0         | 0         | 0         | 0          | 0          | 0          | hypothetical protein, conserved                                                                 |                                                                                   |
| PVX_117040 | 0         | 0         | 0         | 0         | 0         | 0         | 0         | 0         | 77.3628   | 0          | 0          | 0          | derlin-1, putative (DER1-1)                                                                     |                                                                                   |
| PVX_117045 | 0         | 0         | 0         | 0         | 0         | 0         | 0         | 0         | 0         | 0          | 0          | 0          | D13 protein, putative                                                                           |                                                                                   |
| PVX_117050 | 0         | 93.6648   | 0         | 0         | 0         | 0         | 0         | 0         | 0         | 0          | 0          | 0          | hypothetical protein, conserved                                                                 |                                                                                   |
| PVX_117055 | 0         | 131.834   | 0         | 0         | 0         | 0         | 0         | 0         | 71.489    | 0          | 37.528     | 0          | hypothetical protein, conserved                                                                 |                                                                                   |
| PVX_117060 | 59.6971   | 48.5971   | 0         | 0         | 3.15282   | 0         | 30.3897   | 13.812    | 45.2241   | 45.4556    | 33.6655    | 16.0913    | hypothetical protein, conserved                                                                 |                                                                                   |
| PVX_117062 | 0         | 11.3614   | 40.4464   | 0         | 15.48     | 83.2255   | 0         | 0         | 18.5017   | 28.6077    | 12.9623    | 0          | conserved Plasmodium protein, unknown function                                                  |                                                                                   |
| PVX_117065 | 74.5195   | 0         | 0         | 0         | 17.7142   | 0         | 0         | 0         | 28.2282   | 13.0937    | 33.3727    | 0          | TLD domain-containing protein                                                                   |                                                                                   |
| PVX_117070 | 0         | 0         | 0         | 0         | 0         | 0         | 0         | 0         | 0         | 0          | 0          | 0          | hypothetical protein                                                                            |                                                                                   |
| PVX_117075 | 0         | 0         | 0         | 1132.36   | 0         | 0         | 542.375   | 0         | 133.374   | 123.243    | 0          | 0          | hypothetical protein, conserved                                                                 |                                                                                   |
| PVX_117080 | 0         | 0         | 0         | 0         | 0         | 0         | 0         | 0         | 0         | 0          | 0          | 0          | hypothetical protein, conserved                                                                 |                                                                                   |
| PVX_117085 | 0         | 0         | 0         | 0         | 0         | 0         | 100.062   | 0         | 0         | 0          | 13.0319    | 0          | hypothetical protein                                                                            |                                                                                   |
| PVX_117090 | 81.4497   | 56.8852   | 0         | 0         | 25.8552   | 417.166   | 124.673   | 0         | 0         | 0          | 81.0652    | 131.993    | DNA/RNA-binding protein KIN17, putative                                                         |                                                                                   |
| PVX_117095 | 122.132   | 0         | 304.312   | 0         | 0         | 0         | 187.188   | 169.732   | 46.297    | 128.691    | 121.562    | 0          | 50S ribosomal protein L22, apicoplast, putative (L22)                                           |                                                                                   |
| PVX_117100 | 0         | 0         | 160.885   | 0         | 0         | 0         | 0         | 89.8296   | 73.5195   | 0          | 25.747     | 0          | 1-deoxy-D-xylulose 5-phosphate reductoisomerase, putative (DXR)                                 |                                                                                   |
| PVX_117105 | 58.2352   | 0         | 0         | 0         | 0         | 0         | 89.0734   | 161.762   | 22.0657   | 102.304    | 139.101    | 0          | hypothetical protein, conserved                                                                 |                                                                                   |
| PVX_117110 | 0         | 0         | 0         | 0         | 20.6863   | 0         | 0         | 0         | 0         | 45.8088    | 51.9067    | 0          | DNA-3-methyladenine glycosylase, putative                                                       |                                                                                   |
| PVX_117115 | 0         | 0         | 0         | 0         | 0         | 0         | 62.8791   | 0         | 0         | 0          | 24.5615    | 0          | hypothetical protein, conserved                                                                 |                                                                                   |
| PVX_117120 | 0         | 0         | 0         | 0         | 0         | 0         | 0         | 0         | 20.4492   | 18.9689    | 16.1166    | 0          | rhoptyr protein, putative                                                                       |                                                                                   |
| PVX_117125 | 0         | 0         | 0         | 0         | 0         | 0         | 49.5953   | 45.0595   | 12.2939   | 11.4032    | 25.837     | 0          | hypothetical protein, conserved                                                                 |                                                                                   |
| PVX_117130 | 0         | 0         | 0         | 0         | 0         | 0         | 0         | 0         | 99.946    | 0          | 0          | 0          | hypothetical protein, conserved                                                                 |                                                                                   |
| PVX_117135 | 0         | 0         | 0         | 0         | 0         | 0         | 0         | 0         | 0         | 0          | 0          | 0          | hypothetical protein, conserved                                                                 |                                                                                   |
| PVX_117140 | 195.504   | 0         | 0         | 0         | 0         | 0         | 0         | 0         | 74.1475   | 0          | 0          | 0          | hypothetical protein                                                                            |                                                                                   |
| PVX_117145 | 25.7999   | 36.0119   | 0         | 0         | 16.3573   | 0         | 0         | 0         | 19.5471   | 27.1986    | 25.6762    | 0          | transcription factor with AP2 domain(s), putative (ApiAP2)                                      |                                                                                   |
| PVX_117150 | 99.4992   | 17.3601   | 0         | 0         | 23.6557   | 0         | 0         | 0         | 103.653   | 96.1527    | 138.631    | 40.2467    | 26S proteasome regulatory subunit RPN2, putative (RPN2)                                         |                                                                                   |
| PVX_117155 | 0         | 0         | 0         | 0         | 4.35208   | 0         | 0         | 0         | 0         | 4.82607    | 0          | 0          | hypothetical protein                                                                            |                                                                                   |
| PVX_117160 | 0         | 0         | 0         | 0         | 0         | 0         | 56.2055   | 0         | 27.8619   | 12.921     | 29.2768    | 0          | protein phosphatase containing kelch-like domains, putative (PPKL)                              |                                                                                   |
| PVX_117165 | 0         | 0         | 0         | 0         | 0         | 0         | 157.243   | 0         | 0         | 0          | 0          | 0          | hypothetical protein, conserved                                                                 |                                                                                   |
| PVX_117170 | 712.378   | 1244.43   | 887.416   | 0         | 301.79    | 1826.36   | 727.812   | 824.989   | 1260.17   | 1084.27    | 1063.58    | 770.438    | 40S ribosomal protein S3, putative                                                              |                                                                                   |
| PVX_117175 | 0         | 0         | 0         | 0         | 0         | 0         | 0         | 0         | 0         | 0          | 0          | 0          | dynein beta chain, putative                                                                     |                                                                                   |
| PVX_117180 | 0         | 0         | 0         | 0         | 0         | 0         | 0         | 0         | 0         | 0          | 0          | 0          | aspartyl proteinase, putative                                                                   |                                                                                   |
| PVX_117185 | 0         | 0         | 0         | 0         | 0         | 0         | 0         | 0         | 0         | 0          | 27.0367    | 110.015    | hypothetical protein, conserved                                                                 |                                                                                   |
| PVX_117190 | 0         | 0         | 0         | 68.9227   | 0         | 0         | 0         | 0         | 0         | 0          | 4.2956     | 0          | potassium channel, putative                                                                     |                                                                                   |
| PVX_117192 | 0         | 0         | 0         | 0         | 0         | 0         | 1891.45   | 0         | 0         | 1252.15    | 1428.47    | 0          | conserved Plasmodium protein, unknown function                                                  |                                                                                   |
| PVX_117195 | 35.3344   | 24.6632   | 0         | 0         | 11.2038   | 0         | 0         | 0         | 13.3863   | 24.8321    | 7.03309    | 0          | hypothetical protein, conserved                                                                 |                                                                                   |
| PVX_117200 | 0         | 70.1068   | 0         | 0         | 31.8716   | 0         | 0         | 0         | 76.0731   | 70.5049    | 0          | 0          | hypothetical protein, conserved                                                                 |                                                                                   |
| PVX_117205 | 0         | 0         | 96.5241   | 0         | 49.2527   | 0         | 0         | 0         | 44.1327   | 40.9323    | 38.6444    | 62.8503    | hypothetical protein, conserved                                                                 |                                                                                   |
| PVX_117210 | 0         | 0         | 357.13    | 0         | 45.5403   | 0         | 439.389   | 199.115   | 108.616   | 251.536    | 513.29     | 0          | hypothetical protein, conserved                                                                 |                                                                                   |
| PVX_117215 | 46.9595   | 98.3472   | 0         | 0         | 0         | 0         | 0         | 0         | 71.1674   | 33.0001    | 56.0829    | 0          | ATP-dependent zinc metalloprotease FTSH, putative                                               |                                                                                   |
| PVX_117220 | 0         | 0         | 0         | 0         | 0         | 0         | 0         | 0         | 0         | 199.393    | 0          | 0          | hypothetical protein                                                                            |                                                                                   |
| PVX_117225 | 283.879   | 0         | 235.593   | 302.819   | 30.0476   | 0         | 0         | 0         | 0         | 0          | 0          | 37.6725    | 0                                                                                               | vacuolar ATP synthase subunit d, putative,ATP synthase (C/AC39) subunit, putative |
| PVX_117230 | 18.3322   | 38.379    | 0         | 0         | 0         | 93.7159   | 0         | 0         | 6.94428   | 25.7691    | 10.9465    | 0          | Ser/Thr protein phosphatase family protein                                                      |                                                                                   |
| PVX_117240 | 0         | 21.6431   | 0         | 0         | 0         | 0         | 0         | 0         | 0         | 3.63352    | 12.3473    | 16.7217    | hypothetical protein, conserved                                                                 |                                                                                   |
| PVX_117245 | 436.98    | 0         | 0         | 0         | 0         | 0         | 0         | 0         | 332.012   | 153.241    | 174.049    | 0          | hypothetical protein, conserved                                                                 |                                                                                   |
| PVX_117250 | 0         | 26.7558   | 0         | 0         | 0         | 0         | 0         | 53.2262   | 0         | 26.9376    | 15.2591    | 0          | hypothetical protein, conserved                                                                 |                                                                                   |
| PVX_117255 | 0         | 0         | 0         | 0         | 0         | 0         | 60.2452   | 0         | 0         | 0          | 7.84461    | 0          | hypothetical protein, conserved                                                                 |                                                                                   |
| PVX_117260 | 38.4793   | 0         | 0         | 0         | 0         | 0         | 0         | 0         | 14.578    | 13.5209    | 22.9773    | 0          | hypothetical protein, conserved                                                                 |                                                                                   |
| PVX_117265 | 46.0415   | 32.1411   | 0         | 0         | 29.2052   | 0         | 70.3951   | 0         | 17.4439   | 32.3551    | 45.822     | 0          | YL1 nuclear protein, putative                                                                   |                                                                                   |
| PVX_117270 | 0         | 21.6827   | 0         | 0         | 0         | 0         | 0         | 0         | 11.7689   | 0          | 0          | 0          | hypothetical protein, conserved                                                                 |                                                                                   |
| PVX_117275 | 0         | 0         | 0         | 0         | 0         | 0         | 0         | 875.887   | 0         | 219.724    | 249.855    | 0          | hypothetical protein, conserved                                                                 |                                                                                   |
| PVX_117280 | 0         | 0         | 0         | 220.694   | 21.9007   | 0         | 0         | 0         | 0         | 0          | 0          | 0          | cyclin homologue, putative                                                                      |                                                                                   |
| PVX_117285 | 0         | 0         | 0         | 0         | 0         | 0         | 0         | 0         | 59.5562   | 0          | 0          | 0          | hypothetical protein                                                                            |                                                                                   |
| PVX_117290 | 0         | 0         | 0         | 0         | 0         | 0         | 0         | 0         | 0         | 0          | 9.67198    | 0          | hypothetical protein, conserved,Plasmodium yoelii subtelomeric family PYST-A containing protein |                                                                                   |

| Gene ID    | Patient | Patient 1 | Patient 2 | Patient 3 | Patient 4 | Patient 5 | Patient 6 | Patient 7 | Patient 8 | Patient 9 | Patient 10 | Patient 11 | Patient 12 | Gene Description                                                   |
|------------|---------|-----------|-----------|-----------|-----------|-----------|-----------|-----------|-----------|-----------|------------|------------|------------|--------------------------------------------------------------------|
| PVX_117292 |         | 0         | 0         | 0         | 0         | 15.2629   | 0         | 0         | 0         | 54.6962   | 0          | 57.4701    | 0          | DNA-directed RNA polymerase III subunit RPC4, putative             |
| PVX_117295 |         | 0         | 43.3713   | 0         | 0         | 0         | 0         | 0         | 86.2736   | 23.5366   | 43.6474    | 12.3642    | 0          | DNA polymerase alpha subunit, putative                             |
| PVX_117300 |         | 166.537   | 0         | 0         | 266.388   | 0         | 0         | 127.464   | 115.677   | 63.1126   | 58.505     | 82.8757    | 0          | replication factor C3, putative                                    |
| PVX_117310 |         | 0         | 0         | 13.1701   | 0         | 1.68026   | 0         | 0         | 0         | 0         | 0          | 1.0555     | 0          | hypothetical protein                                               |
| PVX_117315 |         | 0         | 72.215    | 257.427   | 0         | 0         | 0         | 0         | 0         | 0         | 0          | 20.577     | 0          | hypothetical protein, conserved                                    |
| PVX_117320 |         | 44.1778   | 0         | 0         | 0         | 0         | 0         | 67.5416   | 0         | 16.7376   | 0          | 35.1737    | 0          | hypothetical protein, conserved                                    |
| PVX_117322 |         | 9272.13   | 4858.61   | 5223.94   | 6361.18   | 3050.6    | 1131.69   | 3720.55   | 7822.64   | 8451.58   | 8142.21    | 7404.95    | 5728.83    | glyceraldehyde-3-phosphate dehydrogenase, putative (GAPDH)         |
| PVX_117325 |         | 0         | 37.4639   | 133.447   | 0         | 17.0224   | 0         | 0         | 0         | 20.3318   | 0          | 53.4057    | 0          | cytochrome c1 precursor, putative                                  |
| PVX_117330 |         | 0         | 0         | 0         | 0         | 0         | 0         | 0         | 0         | 0         | 0          | 38.8734    | 0          | hypothetical protein, conserved                                    |
| PVX_117335 |         | 0         | 0         | 0         | 0         | 0         | 0         | 0         | 0         | 0         | 0          | 0          | 0          | hypothetical protein, conserved                                    |
| PVX_117340 |         | 6.73199   | 0         | 0         | 0         | 2.13307   | 0         | 0         | 0         | 0         | 7.09763    | 1.33991    | 0          | hypothetical protein, conserved                                    |
| PVX_117345 |         | 0         | 0         | 0         | 0         | 0         | 0         | 0         | 59.739    | 24.4493   | 30.2413    | 12.8465    | 0          | hypothetical protein, conserved                                    |
| PVX_117350 |         | 0         | 0         | 0         | 0         | 0         | 0         | 0         | 0         | 0         | 0          | 877.137    | 0          | hypothetical protein, conserved                                    |
| PVX_117356 |         | 22.3691   | 0         | 0         | 0         | 0         | 0         | 0         | 0         | 16.9474   | 31.443     | 0          | 0          | hypothetical protein, conserved                                    |
| PVX_117357 |         | 0         | 0         | 0         | 0         | 176.108   | 0         | 0         | 0         | 0         | 0          | 0          | 0          | thioredoxin-like protein (TLP1)                                    |
| PVX_117360 |         | 0         | 17.2546   | 0         | 78.9642   | 7.83729   | 0         | 37.7755   | 34.3265   | 65.5603   | 78.1923    | 49.2101    | 0          | valine--tRNA ligase, putative                                      |
| PVX_117365 |         | 14.5005   | 0         | 0         | 0         | 0         | 0         | 0         | 0         | 0         | 0          | 2.88615    | 0          | hypothetical protein                                               |
| PVX_117370 |         | 0         | 0         | 0         | 0         | 0         | 0         | 0         | 0         | 0         | 0          | 0          | 0          | hypothetical protein                                               |
| PVX_117375 |         | 43.9608   | 92.0633   | 0         | 0         | 0         | 0         | 0         | 0         | 49.966    | 61.7864    | 43.7511    | 0          | splicing factor 3B subunit 2, putative                             |
| PVX_117380 |         | 0         | 0         | 0         | 0         | 0         | 0         | 0         | 0         | 0         | 72.6038    | 0          | 0          | meiotic nuclear division protein 1, putative (MND1)                |
| PVX_117385 |         | 58.8093   | 0         | 0         | 0         | 0         | 0         | 0         | 0         | 0         | 0          | 23.412     | 0          | phosphatidylinositol-4-phosphate 5-kinase, putative                |
| PVX_117390 |         | 932.694   | 260.914   | 465.636   | 598.503   | 0         | 958.43    | 286.491   | 259.404   | 990.401   | 851.47     | 631.326    | 0          | 40S ribosomal protein S28e, putative                               |
| PVX_117395 |         | 0         | 64.1961   | 0         | 588.178   | 0         | 470.865   | 0         | 127.686   | 0         | 129.141    | 146.356    | 148.981    | U3 small nucleolar ribonucleoprotein protein IMP3, putative (IMP3) |
| PVX_117400 |         | 0         | 0         | 0         | 0         | 0         | 0         | 0         | 0         | 18.0476   | 0          | 0          | 0          | hypothetical protein, conserved                                    |
| PVX_117405 |         | 0         | 53.9368   | 192.193   | 0         | 24.5138   | 0         | 0         | 0         | 0         | 27.1327    | 15.3735    | 0          | hypothetical protein, conserved                                    |
| PVX_117410 |         | 77.2989   | 53.9834   | 0         | 247.249   | 24.5351   | 0         | 0         | 0         | 0         | 27.1562    | 61.5469    | 0          | 30S ribosomal protein S10, putative                                |
| PVX_117415 |         | 0         | 0         | 0         | 0         | 0         | 0         | 0         | 0         | 21.2362   | 0          | 44.6245    | 0          | snRNA-activating protein complex subunit 3, putative               |
| PVX_117420 |         | 377.706   | 197.878   | 470.19    | 302.178   | 149.92    | 0         | 722.981   | 787.155   | 393.664   | 464.387    | 300.744    | 153.079    | 60S ribosomal protein L27, putative (RPL27)                        |
| PVX_117425 |         | 0         | 0         | 0         | 0         | 0         | 0         | 0         | 0         | 0         | 0          | 0          | 0          | inner membrane complex sub-compartment protein 3, putative (ISP3)  |
| PVX_117430 |         | 0         | 0         | 0         | 0         | 0         | 0         | 0         | 0         | 0         | 0          | 0          | 0          | hypothetical protein                                               |
| PVX_117435 |         | 0         | 60.7602   | 0         | 0         | 55.2364   | 0         | 0         | 120.854   | 0         | 61.1198    | 69.2654    | 0          | ubiquitin carboxyl-terminal hydrolase isozyme L3, putative (UCHL3) |
| PVX_117440 |         | 1082.28   | 947.152   | 2031      | 870.181   | 258.869   | 2787.42   | 0         | 1882.86   | 513.353   | 1424.45    | 754.211    | 881.639    | 60S ribosomal protein L29, putative                                |
| PVX_117445 |         | 136.058   | 0         | 339.144   | 0         | 0         | 0         | 0         | 189.112   | 0         | 47.7851    | 81.2556    | 0          | hypothetical protein, conserved                                    |
| PVX_117450 |         | 0         | 0         | 0         | 0         | 0         | 0         | 0         | 0         | 0         | 0          | 10.2864    | 0          | kelch domain-containing protein                                    |
| PVX_117455 |         | 0         | 173.532   | 0         | 0         | 0         | 0         | 0         | 0         | 47.0684   | 43.6109    | 0          | 0          | FYVE and coiled-coil domain-containing protein, putative (FCP)     |
| PVX_117460 |         | 0         | 0         | 0         | 0         | 0         | 0         | 0         | 0         | 0         | 0          | 0          | 0          | hypothetical protein                                               |
| PVX_117465 |         | 0         | 0         | 0         | 0         | 0         | 0         | 0         | 0         | 0         | 0          | 0          | 0          | hypothetical protein, conserved                                    |
| PVX_117470 |         | 205.082   | 286.54    | 0         | 328.221   | 32.5672   | 0         | 314.125   | 427.434   | 233.191   | 108.058    | 224.532    | 166.271    | bax inhibitor 1, putative                                          |
| PVX_117475 |         | 243.932   | 0         | 0         | 0         | 0         | 0         | 0         | 0         | 46.2338   | 171.355    | 242.793    | 0          | hypothetical protein, conserved                                    |
| PVX_117480 |         | 54.7401   | 0         | 0         | 0         | 17.3535   | 0         | 41.8226   | 0         | 72.5793   | 96.1788    | 125.299    | 0          | hypothetical protein, conserved                                    |
| PVX_117485 |         | 0         | 0         | 0         | 0         | 0         | 0         | 0         | 0         | 12.201    | 45.2683    | 12.8209    | 0          | hypothetical protein, conserved                                    |
| PVX_117490 |         | 108.773   | 151.989   | 0         | 0         | 69.1032   | 0         | 166.641   | 151.146   | 123.687   | 38.2072    | 43.3052    | 0          | hypothetical protein, conserved                                    |
| PVX_117495 |         | 0         | 68.7936   | 0         | 0         | 0         | 0         | 0         | 0         | 37.3245   | 0          | 58.8098    | 0          | OPA3-like protein, putative                                        |
| PVX_117500 |         | 42.5398   | 0         | 0         | 135.935   | 0         | 0         | 0         | 0         | 80.5842   | 59.7897    | 76.2063    | 0          | hypothetical protein, conserved                                    |
| PVX_117505 |         | 0         | 28.5938   | 0         | 130.889   | 0         | 0         | 62.6197   | 113.764   | 15.5191   | 14.3934    | 24.4603    | 0          | GTP-binding protein, putative                                      |
| PVX_117510 |         | 128.918   | 112.476   | 80.1019   | 0         | 40.874    | 0         | 49.2556   | 0         | 97.678    | 113.252    | 141.131    | 104.314    | ATP-dependent RNA helicase DBP5, putative (DBP5)                   |
| PVX_117515 |         | 0         | 0         | 0         | 0         | 0         | 0         | 0         | 0         | 0         | 64.9566    | 0          | 0          | hypothetical protein, conserved                                    |
| PVX_117525 |         | 33.446    | 23.3446   | 0         | 0         | 0         | 0         | 0         | 0         | 12.6707   | 23.5053    | 33.286     | 0          | hypothetical protein, conserved                                    |
| PVX_117530 |         | 0         | 0         | 185.147   | 0         | 70.8463   | 0         | 0         | 0         | 28.1963   | 130.703    | 59.244     | 0          | exonuclease V, mitochondrial, putative                             |
| PVX_117535 |         | 0         | 50.1157   | 0         | 76.4491   | 22.7631   | 0         | 0         | 33.2337   | 0         | 25.2346    | 38.115     | 0          | hypothetical protein, conserved                                    |
| PVX_117540 |         | 0         | 0         | 53.9735   | 0         | 0         | 0         | 0         | 0         | 0         | 0          | 17.295     | 0          | spindle assembly abnormal protein 4, putative (SAS4)               |
| PVX_117545 |         | 0         | 0         | 0         | 0         | 148.523   | 0         | 0         | 0         | 0         | 0          | 23.2646    | 0          | aminodeoxychorismate lyase, putative (ADCL)                        |
| PVX_117550 |         | 0         | 14.6684   | 0         | 67.1248   | 26.6492   | 0         | 32.1113   | 0         | 47.7729   | 44.3179    | 25.1016    | 0          | hypothetical protein, conserved                                    |
| PVX_117555 |         | 667.651   | 0         | 0         | 0         | 0         | 0         | 0         | 0         | 508.062   | 233.868    | 133.002    | 0          | hypothetical protein, conserved                                    |
| PVX_117560 |         | 0         | 0         | 0         | 0         | 0         | 0         | 8223.06   | 0         | 0         | 1659.9     | 0          | 0          | hypothetical protein, conserved                                    |
| PVX_117565 |         | 15.9888   | 33.4856   | 39.7554   | 0         | 0         | 0         | 0         | 22.204    | 72.6936   | 33.7074    | 14.3213    | 38.8293    | cysteine proteinase precursor,vivapain-1                           |
| PVX_117570 |         | 0         | 0         | 0         | 0         | 2.6776    | 0         | 12.9044   | 0         | 0         | 0          | 5.04567    | 0          | hypothetical protein, conserved                                    |
| PVX_117575 |         | 0         | 0         | 0         | 0         | 0         | 0         | 0         | 0         | 0         | 0          | 28.2591    | 0          | hypothetical protein, conserved                                    |
| PVX_117580 |         | 17.7364   | 37.1313   | 44.0633   | 0         | 5.6214    | 0         | 0         | 24.6237   | 47.0298   | 24.9316    | 38.8326    | 0          | hypothetical protein, conserved                                    |
| PVX_117585 |         | 98.4116   | 0         | 122.353   | 0         | 15.6074   | 0         | 0         | 68.3343   | 18.6432   | 69.1564    | 39.1772    | 0          | hypothetical protein, conserved                                    |
| PVX_117590 |         | 0         | 0         | 0         | 0         | 0         | 0         | 0         | 0         | 0         | 28.1528    | 0          | 0          | vacuolar protein sorting-associated protein 4, putative (VP54)     |
| PVX_117595 |         | 19.5406   | 0         | 0         | 0         | 0         | 0         | 14.921    | 13.5632   | 11.1024   | 0          | 15.5572    | 0          | hypothetical protein, conserved                                    |

| Gene ID    | Patient 1 | Patient 2 | Patient 3 | Patient 4 | Patient 5 | Patient 6 | Patient 7 | Patient 8 | Patient 9 | Patient 10 | Patient 11 | Patient 12 | Gene Description                                            |
|------------|-----------|-----------|-----------|-----------|-----------|-----------|-----------|-----------|-----------|------------|------------|------------|-------------------------------------------------------------|
| PVX_117600 | 158.887   | 73.9516   | 0         | 0         | 100.803   | 0         | 80.9946   | 0         | 60.2009   | 148.869    | 52.7103    | 0          | hypothetical protein, conserved                             |
| PVX_117605 | 0         | 518.001   | 0         | 792.885   | 0         | 0         | 0         | 686.546   | 561.59    | 606.176    | 343.829    | 1204.99    | thioredoxin 1, putative (TRX1)                              |
| PVX_117610 | 0         | 28.0164   | 0         | 0         | 0         | 0         | 0         | 0         | 0         | 0          | 7.98887    | 0          | hypothetical protein, conserved                             |
| PVX_117615 | 0         | 0         | 341.553   | 0         | 21.7829   | 0         | 105.027   | 0         | 208.088   | 144.697    | 68.3175    | 111.199    | signal peptide peptidase, putative (SPP)                    |
| PVX_117620 | 0         | 0         | 0         | 0         | 0         | 0         | 295.794   | 0         | 73.0292   | 67.6096    | 0          | 0          | conserved protein, unknown function                         |
| PVX_117625 | 0         | 201.727   | 0         | 131.917   | 26.1843   | 0         | 0         | 57.3283   | 93.8452   | 72.5311    | 8.21737    | 0          | V-type H(+)-translocating pyrophosphatase, putative (VP1)   |
| PVX_117630 | 0         | 0         | 230.611   | 0         | 0         | 0         | 141.813   | 128.804   | 0         | 16.2949    | 110.771    | 0          | hypothetical protein, conserved                             |
| PVX_117635 | 139.234   | 0         | 0         | 0         | 0         | 0         | 213.515   | 0         | 158.357   | 97.7989    | 166.304    | 0          | hypothetical protein, conserved                             |
| PVX_117640 | 0         | 0         | 31.7313   | 0         | 0         | 0         | 0         | 35.4677   | 0         | 4.48923    | 35.5959    | 0          | hypothetical protein, conserved                             |
| PVX_117645 | 0         | 0         | 0         | 0         | 10.9952   | 0         | 0         | 0         | 0         | 0          | 0          | 0          | hypothetical protein, conserved                             |
| PVX_117650 | 77.8368   | 0         | 0         | 497.945   | 24.7061   | 0         | 0         | 108.126   | 0         | 27.3451    | 77.469     | 0          | hypothetical protein, conserved                             |
| PVX_117655 | 194.149   | 0         | 0         | 0         | 36.9395   | 0         | 0         | 107.839   | 29.4218   | 54.5764    | 92.7466    | 125.701    | hypothetical protein, conserved                             |
| PVX_117660 | 0         | 0         | 0         | 0         | 0         | 0         | 0         | 0         | 56.3458   | 0          | 0          | 0          | serine hydroxymethyltransferase, putative                   |
| PVX_117665 | 0         | 0         | 0         | 0         | 0         | 0         | 0         | 0         | 0         | 0          | 0          | 0          | transcription factor with AP2 domain(s), putative (ApiAP2)  |
| PVX_117670 | 79.9936   | 0         | 199.08    | 0         | 0         | 0         | 0         | 0         | 0         | 0          | 47.7695    | 0          | polyprenol reductase, putative                              |
| PVX_117675 | 0         | 11.6955   | 0         | 0         | 0         | 0         | 0         | 0         | 6.34859   | 0          | 0          | 0          | LCCL domain-containing protein (CCp2)                       |
| PVX_117680 | 0         | 0         | 0         | 0         | 0         | 0         | 0         | 0         | 0         | 0          | 16.5972    | 44.9754    | hypothetical protein, conserved                             |
| PVX_117685 | 0         | 0         | 0         | 0         | 0         | 0         | 0         | 0         | 0         | 0          | 0          | 0          | ferlin, putative                                            |
| PVX_117690 | 26.37     | 55.212    | 131.056   | 0         | 16.7191   | 0         | 0         | 0         | 19.9791   | 27.7995    | 78.7309    | 0          | AP-1 complex subunit gamma, putative                        |
| PVX_117695 | 89.9651   | 0         | 0         | 0         | 28.5642   | 0         | 137.745   | 124.989   | 102.287   | 94.8118    | 107.45     | 145.828    | hemolysin III, putative (HlyIII)                            |
| PVX_117700 | 0         | 0         | 0         | 0         | 0         | 0         | 0         | 0         | 0         | 0          | 0          | 0          | Pv-fam-g protein                                            |
| PVX_117705 | 0         | 0         | 0         | 0         | 0         | 0         | 0         | 0         | 0         | 40.8895    | 0          | 0          | methyltransferase, putative                                 |
| PVX_117710 | 0         | 0         | 0         | 0         | 0         | 0         | 0         | 0         | 0         | 0          | 0          | 0          | hypothetical protein                                        |
| PVX_117715 | 0         | 187.722   | 0         | 0         | 0         | 0         | 0         | 0         | 0         | 0          | 106.776    | 0          | protein tyrosine phosphatase, putative (PTP1)               |
| PVX_117720 | 0         | 0         | 0         | 0         | 0         | 0         | 0         | 0         | 0         | 0          | 0          | 0          | hypothetical protein                                        |
| PVX_117725 | 0         | 0         | 0         | 0         | 0         | 0         | 0         | 0         | 0         | 0          | 10.8305    | 0          | hypothetical protein                                        |
| PVX_117730 | 0         | 0         | 0         | 0         | 0         | 0         | 0         | 0         | 0         | 0          | 0          | 0          | protein phosphatase 2C, putative                            |
| PVX_117735 | 0         | 0         | 0         | 0         | 0         | 0         | 0         | 0         | 0         | 0          | 0          | 0          | Pv-fam-g protein                                            |
| PVX_117740 | 0         | 0         | 0         | 0         | 0         | 0         | 0         | 0         | 0         | 0          | 0          | 0          | Pv-fam-g protein                                            |
| PVX_117745 | 238.211   | 83.161    | 148.124   | 380.781   | 151.153   | 0         | 546.555   | 578.984   | 248.216   | 564.937    | 474.16     | 96.4488    | 6-phosphogluconate dehydrogenase, decarboxylating, putative |
| PVX_117750 | 0         | 0         | 0         | 239.575   | 47.5477   | 0         | 114.632   | 104.05    | 141.926   | 131.578    | 104.371    | 121.365    | ribosomal protein S11, putative                             |
| PVX_117755 | 147.252   | 102.929   | 0         | 0         | 0         | 0         | 0         | 0         | 0         | 0          | 29.3139    | 0          | nifU protein, putative                                      |
| PVX_117760 | 131.475   | 229.414   | 0         | 105.003   | 31.264    | 0         | 0         | 45.6389   | 161.875   | 92.3983    | 157.015    | 53.1926    | peptidase, putative                                         |
| PVX_117765 | 0         | 0         | 0         | 0         | 0         | 0         | 0         | 0         | 0         | 0          | 0          | 0          | serine/threonine protein kinase, putative                   |
| PVX_117770 | 19.2925   | 53.8533   | 0         | 61.6086   | 12.2297   | 0         | 29.4722   | 0         | 29.2324   | 47.458     | 26.8799    | 0          | hypothetical protein, conserved                             |
| PVX_117775 | 0         | 0         | 0         | 0         | 0         | 0         | 0         | 399.587   | 0         | 201.485    | 114.313    | 0          | tRNA intron endonuclease, putative                          |
| PVX_117780 | 53.4367   | 37.3072   | 0         | 0         | 16.9511   | 0         | 81.7212   | 0         | 40.4936   | 18.7753    | 31.9095    | 0          | RNA-binding protein, putative                               |
| PVX_117785 | 0         | 24.959    | 88.8802   | 0         | 0         | 0         | 0         | 0         | 0         | 0          | 14.2348    | 0          | hypothetical protein, conserved                             |
| PVX_117790 | 104.032   | 48.4086   | 86.1913   | 0         | 21.9904   | 0         | 53.0005   | 48.1509   | 52.549    | 134.037    | 103.534    | 56.1222    | glucose-6-phosphate 1-dehydrogenase, putative               |
| PVX_117795 | 1277.49   | 446.162   | 1362.99   | 875.954   | 260.756   | 467.495   | 978.018   | 887.42    | 899.15    | 1121.92    | 1180.66    | 295.829    | hypothetical protein, conserved                             |
| PVX_117800 | 0         | 13.4459   | 0         | 0         | 0         | 0         | 0         | 0         | 0         | 13.5419    | 7.67004    | 0          | hypothetical protein, conserved                             |
| PVX_117805 | 0         | 0         | 0         | 0         | 0         | 0         | 0         | 0         | 0         | 0          | 0          | 0          | pyridine nucleotide transhydrogenase, putative              |
| PVX_117810 | 0         | 23.532    | 0         | 0         | 10.6876   | 0         | 0         | 0         | 31.9343   | 17.7758    | 16.7799    | 0          | hypothetical protein, conserved                             |
| PVX_117812 | 0         | 0         | 0         | 0         | 0         | 0         | 0         | 0         | 0         | 0          | 0          | 0          | conserved Plasmodium protein, unknown function              |
| PVX_117815 | 0         | 0         | 0         | 0         | 0         | 0         | 0         | 0         | 0         | 0          | 3.85912    | 0          | hypothetical protein, conserved                             |
| PVX_117825 | 0         | 0         | 0         | 0         | 0         | 0         | 0         | 0         | 0         | 0          | 9.84301    | 0          | dynactin subunit 4, putative                                |
| PVX_117830 | 63.7019   | 0         | 0         | 0         | 10.0984   | 162.891   | 48.6765   | 44.2253   | 24.1326   | 44.7689    | 0          | 0          | hypothetical protein, conserved                             |
| PVX_117835 | 0         | 220.391   | 0         | 0         | 0         | 0         | 0         | 0         | 0         | 0          | 31.3796    | 0          | hypothetical protein, conserved                             |
| PVX_117840 | 0         | 0         | 458.905   | 0         | 0         | 0         | 0         | 0         | 69.7243   | 64.5567    | 73.2053    | 0          | hypothetical protein, conserved                             |
| PVX_117845 | 0         | 0         | 295.805   | 0         | 37.7237   | 0         | 181.953   | 0         | 45.0061   | 0          | 23.635     | 192.609    | hypothetical protein, conserved                             |
| PVX_117850 | 0         | 0         | 0         | 31.7855   | 0         | 0         | 0         | 13.8212   | 18.856    | 6.99783    | 3.96329    | 16.102     | hypothetical protein, conserved                             |
| PVX_117855 | 410.749   | 0         | 0         | 0         | 65.3922   | 0         | 0         | 285.65    | 77.8962   | 216.313    | 40.8877    | 0          | hypothetical protein, conserved                             |
| PVX_117860 | 34.7176   | 24.2325   | 0         | 110.915   | 11.008    | 0         | 0         | 48.207    | 39.4577   | 12.1994    | 27.6412    | 0          | hypothetical protein, conserved                             |
| PVX_117865 | 0         | 0         | 0         | 0         | 32.8692   | 0         | 0         | 0         | 0         | 0          | 0          | 0          | hypothetical protein, conserved                             |
| PVX_117870 | 0         | 0         | 0         | 198.875   | 0         | 0         | 0         | 86.3936   | 47.1386   | 0          | 12.3813    | 0          | aminomethyl transferase domain containing protein           |
| PVX_117875 | 0         | 86.6823   | 0         | 396.92    | 0         | 0         | 0         | 86.2137   | 0         | 0          | 12.3556    | 0          | hypothetical protein, conserved                             |
| PVX_117880 | 0         | 9.74429   | 0         | 0         | 0         | 0         | 0         | 0         | 0         | 4.90739    | 0          | 0          | rhostry neck protein 2, putative (RON2)                     |
| PVX_117885 | 0         | 18.3391   | 0         | 83.9295   | 8.33006   | 0         | 0         | 0         | 49.7718   | 18.4677    | 10.4605    | 0          | hypothetical protein, conserved                             |
| PVX_117890 | 32.6409   | 0         | 0         | 0         | 0         | 0         | 0         | 0         | 24.7313   | 11.4698    | 32.4847    | 0          | sortilin, putative                                          |
| PVX_117895 | 0         | 0         | 0         | 0         | 0         | 0         | 0         | 0         | 0         | 0          | 0          | 0          | protein phosphatase 2b regulatory subunit, putative (CNB)   |
| PVX_117900 | 0         | 0         | 0         | 0         | 0         | 0         | 0         | 0         | 0         | 0          | 0          | 0          | LCCL domain-containing protein (LAP5)                       |
| PVX_117905 | 0         | 229.716   | 0         | 0         | 0         | 0         | 0         | 0         | 0         | 57.689     | 32.7047    | 0          | pre-mRNA-splicing factor CWF18, putative                    |

| Gene ID    | Patient | Patient 1 | Patient 2 | Patient 3 | Patient 4 | Patient 5 | Patient 6 | Patient 7 | Patient 8 | Patient 9 | Patient 10 | Patient 11 | Patient 12 | Gene Description                                                |
|------------|---------|-----------|-----------|-----------|-----------|-----------|-----------|-----------|-----------|-----------|------------|------------|------------|-----------------------------------------------------------------|
| PVX_117910 | 0       | 34.9242   | 0         | 0         | 7.93156   | 0         | 0         | 0         | 9.47837   | 8.79247   | 14.9405    | 40.4832    | 0          | hypothetical protein, conserved                                 |
| PVX_117915 | 180.519 | 0         | 0         | 579.089   | 57.4429   | 0         | 0         | 251.018   | 0         | 190.157   | 143.752    | 0          | 0          | hypothetical protein, conserved                                 |
| PVX_117920 | 18.3887 | 51.3297   | 0         | 58.7209   | 5.82825   | 188.01    | 0         | 0         | 27.8627   | 25.8485   | 29.2806    | 29.747     | 0          | hypothetical protein, conserved                                 |
| PVX_117925 | 1013.53 | 544.211   | 387.612   | 498.216   | 111.253   | 199.403   | 178.765   | 541.308   | 649.818   | 643.786   | 426.755    | 315.485    | 0          | elongation factor 2, putative                                   |
| PVX_117930 | 41.5909 | 0         | 0         | 0         | 13.1896   | 0         | 0         | 0         | 0         | 0         | 107.62     | 67.3245    | 0          | hypothetical protein, conserved                                 |
| PVX_117935 | 0       | 0         | 0         | 0         | 0         | 0         | 0         | 0         | 0         | 0         | 0          | 0          | 0          | acetyl-CoA acetyltransferase, putative                          |
| PVX_117940 | 0       | 55.3717   | 0         | 0         | 0         | 0         | 242.702   | 0         | 90.1375   | 0         | 94.6925    | 0          | 0          | hypothetical protein, conserved                                 |
| PVX_117945 | 0       | 42.9625   | 76.49     | 98.3162   | 0         | 0         | 0         | 0         | 11.6596   | 10.8151   | 55.1343    | 0          | 0          | hypothetical protein, conserved                                 |
| PVX_117950 | 52.2816 | 36.5002   | 130.012   | 167.11    | 49.7528   | 0         | 0         | 0         | 19.809    | 36.7391   | 72.846     | 0          | 0          | hypothetical protein, conserved                                 |
| PVX_117960 | 18.6105 | 0         | 0         | 0         | 5.89858   | 0         | 0         | 0         | 14.0994   | 0         | 3.70423    | 0          | 0          | hypothetical protein, conserved                                 |
| PVX_117965 | 0       | 0         | 0         | 53.6879   | 10.6575   | 85.9475   | 25.6829   | 23.3421   | 31.8443   | 29.5428   | 16.7326    | 27.1974    | 0          | hypothetical protein, conserved                                 |
| PVX_117970 | 40.5727 | 28.3214   | 0         | 0         | 12.8664   | 0         | 0         | 0         | 30.7427   | 42.7691   | 8.07579    | 0          | 0          | flavodoxin domain containing protein                            |
| PVX_117975 | 0       | 0         | 0         | 0         | 0         | 0         | 0         | 0         | 0         | 0         | 28.2448    | 0          | 0          | hypothetical protein                                            |
| PVX_117980 | 0       | 102.541   | 0         | 0         | 0         | 187.852   | 0         | 0         | 41.7414   | 25.8103   | 36.5509    | 118.884    | 0          | signal recognition particle subunit SRP54, putative (SRP54)     |
| PVX_117985 | 0       | 0         | 0         | 0         | 0         | 0         | 0         | 0         | 0         | 33.776    | 38.2797    | 0          | 0          | protein kinase, putative                                        |
| PVX_117990 | 0       | 0         | 0         | 0         | 0         | 0         | 0         | 22.5052   | 41.7361   | 35.4676   | 0          | 0          | 0          | hypothetical protein, conserved                                 |
| PVX_117995 | 0       | 0         | 0         | 0         | 441.751   | 66.0108   | 0         | 0         | 32.6821   | 30.295    | 60.0816    | 0          | 0          | hypothetical protein, conserved                                 |
| PVX_118000 | 0       | 0         | 0         | 0         | 8.14811   | 0         | 0         | 0         | 9.73703   | 18.0647   | 25.5803    | 0          | 0          | exosome complex exonuclease RRP6, putative (RRP6)               |
| PVX_118005 | 0       | 0         | 0         | 0         | 0         | 0         | 0         | 0         | 0         | 0         | 0          | 0          | 0          | hypothetical protein, conserved                                 |
| PVX_118010 | 0       | 0         | 0         | 0         | 0         | 0         | 0         | 0         | 0         | 0         | 0          | 0          | 0          | Histone H1, gonadal, putative                                   |
| PVX_118015 | 0       | 0         | 0         | 0         | 0         | 0         | 0         | 0         | 0         | 0         | 7.92489    | 0          | 0          | transcription factor with AP2 domain(s), putative (ApiAP2)      |
| PVX_118020 | 0       | 0         | 0         | 0         | 0         | 0         | 34.9179   | 31.7311   | 0         | 8.03136   | 4.54901    | 0          | 0          | crossover junction endonuclease MUS81, putative (MUS81)         |
| PVX_118025 | 0       | 29.5268   | 105.157   | 135.163   | 13.4142   | 0         | 64.6646   | 176.214   | 48.0762   | 89.176    | 33.6774    | 0          | 0          | transcription factor IIIb subunit, putative                     |
| PVX_118030 | 0       | 0         | 0         | 0         | 0         | 0         | 0         | 0         | 0         | 573.21    | 0          | 0          | 0          | hypothetical protein, conserved                                 |
| PVX_118035 | 0       | 0         | 0         | 0         | 0         | 0         | 0         | 0         | 0         | 0         | 15.641     | 0          | 0          | hypothetical protein, conserved                                 |
| PVX_118040 | 0       | 0         | 0         | 0         | 0         | 0         | 0         | 0         | 0         | 0         | 0          | 0          | 0          | gamete egress and sporozoite traversal protein, putative (GEST) |
| PVX_118045 | 0       | 0         | 0         | 0         | 0         | 0         | 0         | 0         | 0         | 0         | 58.2787    | 0          | 0          | hypothetical protein                                            |
| PVX_118050 | 0       | 100.123   | 0         | 0         | 0         | 0         | 0         | 0         | 0         | 50.3073   | 28.5161    | 0          | 0          | hypothetical protein, conserved                                 |
| PVX_118055 | 152.231 | 53.1561   | 0         | 0         | 0         | 0         | 0         | 105.733   | 86.5325   | 53.4812   | 60.6046    | 0          | 0          | hypothetical protein, conserved                                 |
| PVX_118060 | 0       | 133.526   | 0         | 0         | 0         | 0         | 0         | 0         | 0         | 67.0332   | 38.0085    | 0          | 0          | hypothetical protein, conserved                                 |
| PVX_118062 | 27.8774 | 0         | 46.1605   | 29.6661   | 5.88912   | 0         | 14.1911   | 0         | 14.0791   | 32.6568   | 29.5927    | 15.0284    | 0          | chloroquine resistance marker protein, putative                 |
| PVX_118065 | 35.9014 | 25.0592   | 0         | 0         | 22.7674   | 0         | 0         | 49.8514   | 54.4046   | 50.4611   | 21.4379    | 0          | 0          | ubiquitin-protein ligase, putative                              |
| PVX_118070 | 0       | 14.2662   | 0         | 0         | 6.4796    | 0         | 0         | 0         | 0         | 7.18387   | 4.06893    | 0          | 0          | hypothetical protein, conserved                                 |
| PVX_118075 | 0       | 0         | 0         | 0         | 0         | 0         | 0         | 0         | 0         | 0         | 0          | 0          | 0          | hypothetical protein                                            |
| PVX_118080 | 53.2579 | 0         | 0         | 0         | 0         | 0         | 40.6892   | 0         | 30.263    | 37.43     | 15.9008    | 0          | 0          | hypothetical protein, conserved                                 |
| PVX_118090 | 0       | 0         | 0         | 0         | 0         | 0         | 0         | 166.323   | 0         | 0         | 71.4741    | 0          | 0          | hypothetical protein, conserved                                 |
| PVX_118095 | 66.2954 | 77.1099   | 109.814   | 0         | 0         | 0         | 0         | 92.0429   | 0         | 31.0626   | 21.9924    | 0          | 0          | WD domain, G-beta repeat domain containing protein              |
| PVX_118100 | 19.3929 | 0         | 0         | 0         | 0         | 0         | 26.9239   | 22.0383   | 13.6299   | 3.85995   | 0          | 0          | 0          | multidrug resistance protein 2, putative                        |
| PVX_118105 | 0       | 0         | 0         | 0         | 5.67769   | 0         | 0         | 6.78579   | 6.29527   | 17.8278   | 0          | 0          | 0          | calponin homology domain-containing protein, putative           |
| PVX_118110 | 0       | 151.989   | 0         | 348.228   | 0         | 0         | 0         | 0         | 82.4577   | 38.2072   | 216.526    | 0          | 0          | hypothetical protein, conserved                                 |
| PVX_118115 | 0       | 0         | 0         | 0         | 0         | 0         | 0         | 0         | 0         | 0         | 0          | 0          | 0          | hypothetical protein                                            |
| PVX_118120 | 0       | 0         | 0         | 0         | 0         | 0         | 0         | 0         | 0         | 0         | 0          | 0          | 0          | hypothetical protein, conserved                                 |
| PVX_118125 | 0       | 0         | 0         | 0         | 0         | 0         | 0         | 152.631   | 0         | 77.1644   | 65.5957    | 0          | 0          | hypothetical protein                                            |
| PVX_118130 | 0       | 0         | 0         | 0         | 0         | 0         | 0         | 0         | 0         | 97.9196   | 166.657    | 0          | 0          | mitochondrial ribosomal protein S14 precursor, putative         |
| PVX_118135 | 48.5123 | 67.7341   | 0         | 155.046   | 30.7744   | 0         | 74.1787   | 67.3708   | 36.7607   | 34.091    | 57.9375    | 78.5438    | 0          | hypothetical protein, conserved                                 |
| PVX_118140 | 0       | 342.057   | 0         | 0         | 0         | 0         | 250.28    | 226.735   | 0         | 114.538   | 32.4663    | 0          | 0          | hypothetical protein, conserved                                 |
| PVX_118145 | 1094.1  | 903.274   | 743.015   | 1591.72   | 221.113   | 1019.41   | 761.673   | 1381.98   | 1394.83   | 628.905   | 752.376    | 322.536    | 0          | 40S ribosomal protein S5, putative                              |
| PVX_118150 | 0       | 0         | 0         | 0         | 32.1973   | 0         | 0         | 0         | 0         | 0         | 20.1807    | 0          | 0          | hypothetical protein, conserved                                 |
| PVX_118155 | 214.223 | 0         | 0         | 0         | 68.2246   | 0         | 0         | 0         | 81.2575   | 75.2079   | 127.95     | 0          | 0          | heme detoxification protein, putative (HDP)                     |
| PVX_118160 | 0       | 0         | 0         | 0         | 0         | 0         | 0         | 0         | 39.3616   | 0         | 62.0177    | 0          | 0          | hypothetical protein, conserved                                 |
| PVX_118162 | 0       | 0         | 0         | 0         | 0         | 0         | 0         | 0         | 0         | 103.392   | 58.6626    | 0          | 0          | centrin-2, putative (CEN2)                                      |
| PVX_118165 | 20.4329 | 7.12871   | 25.3758   | 0         | 0         | 0         | 15.6026   | 0         | 34.8281   | 17.9519   | 20.3345    | 16.5231    | 0          | hypothetical protein, conserved                                 |
| PVX_118170 | 0       | 0         | 0         | 0         | 0         | 0         | 0         | 0         | 0         | 0         | 17.5035    | 0          | 0          | pyruvate dehydrogenase E1 component subunit beta, putative      |
| PVX_118175 | 0       | 0         | 0         | 0         | 7.95381   | 0         | 0         | 0         | 0         | 0         | 0          | 0          | 0          | hypothetical protein, conserved                                 |
| PVX_118180 | 502.578 | 287.054   | 0         | 584.043   | 72.4532   | 233.757   | 349.276   | 253.792   | 432.757   | 385.288   | 354.674    | 443.8      | 0          | M17 leucyl aminopeptidase, putative                             |
| PVX_118185 | 0       | 0         | 0         | 0         | 0         | 0         | 0         | 0         | 0         | 0         | 0          | 0          | 0          | hypothetical protein, conserved                                 |
| PVX_118190 | 0       | 135.478   | 0         | 0         | 41.0431   | 331.08    | 296.827   | 269.489   | 196.052   | 181.779   | 141.609    | 0          | 0          | ATP-dependent RNA helicase DDX5, putative (DDX5)                |
| PVX_118195 | 0       | 0         | 0         | 0         | 0         | 0         | 0         | 0         | 0         | 0         | 0          | 0          | 0          | hypothetical protein, conserved                                 |
| PVX_118200 | 200.844 | 140.245   | 0         | 214.078   | 84.9771   | 0         | 0         | 185.98    | 101.474   | 117.605   | 93.2832    | 0          | 0          | hypothetical protein, conserved                                 |
| PVX_118205 | 0       | 28.9518   | 0         | 0         | 0         | 0         | 0         | 0         | 31.4268   | 29.1469   | 24.7664    | 0          | 0          | hypothetical protein, conserved                                 |
| PVX_118210 | 0       | 0         | 0         | 0         | 0         | 0         | 0         | 0         | 0         | 124.216   | 70.5047    | 0          | 0          | hypothetical protein, conserved                                 |
| PVX_118215 | 0       | 0         | 0         | 0         | 0         | 0         | 0         | 455.231   | 0         | 0         | 0          | 0          | 0          | hypothetical protein                                            |

| Gene ID    | Patient 1 | Patient 2 | Patient 3 | Patient 4 | Patient 5 | Patient 6 | Patient 7 | Patient 8 | Patient 9 | Patient 10 | Patient 11 | Patient 12 | Gene Description                                                                           |
|------------|-----------|-----------|-----------|-----------|-----------|-----------|-----------|-----------|-----------|------------|------------|------------|--------------------------------------------------------------------------------------------|
| Patient    |           |           |           |           |           |           |           |           |           |            |            |            |                                                                                            |
| PVX_118220 | 0         | 25.4473   | 0         | 0         | 11.5601   | 0         | 0         | 50.6233   | 55.247    | 76.8631    | 43.5395    | 0          | serine/threonine kinase-1, putative                                                        |
| PVX_118225 | 55.5254   | 0         | 138.091   | 0         | 35.2292   | 0         | 0         | 77.1154   | 42.077    | 19.509     | 77.366     | 0          | hypothetical protein, conserved                                                            |
| PVX_118230 | 33.6852   | 0         | 0         | 0         | 0         | 0         | 0         | 46.773    | 38.2841   | 5.91833    | 10.0572    | 0          | RNA helicase, putative                                                                     |
| PVX_118235 | 60.3715   | 63.2043   | 75.0182   | 192.849   | 38.2802   | 0         | 0         | 83.825    | 68.6121   | 106.072    | 114.157    | 0          | histidine-tRNA ligase, putative                                                            |
| PVX_118240 | 0         | 61.0573   | 0         | 279.691   | 0         | 0         | 0         | 121.445   | 0         | 30.7091    | 121.807    | 0          | hypothetical protein, conserved                                                            |
| PVX_118245 | 0         | 0         | 0         | 0         | 0         | 0         | 0         | 0         | 33.689    | 62.4548    | 70.7792    | 144.085    | hypothetical protein, conserved                                                            |
| PVX_118255 | 986.961   | 1999.42   | 491.509   | 0         | 501.489   | 0         | 604.62    | 1234.17   | 1720.72   | 1490.79    | 864.446    | 320.039    | fructose 1,6-bisphosphate aldolase, putative                                               |
| PVX_118260 | 0         | 0         | 0         | 0         | 0         | 0         | 366.389   | 0         | 0         | 0          | 47.4186    | 0          | hypothetical protein, conserved                                                            |
| PVX_118265 | 0         | 0         | 0         | 0         | 0         | 0         | 0         | 0         | 0         | 0          | 0          | 0          | hypothetical protein                                                                       |
| PVX_118270 | 0         | 0         | 0         | 0         | 0         | 0         | 0         | 0         | 0         | 0          | 4.06893    | 0          | serine/threonine protein kinase, putative                                                  |
| PVX_118275 | 0         | 48.6423   | 0         | 0         | 0         | 0         | 0         | 0         | 26.3958   | 24.4727    | 41.5968    | 0          | hypothetical protein, conserved                                                            |
| PVX_118280 | 0         | 185.108   | 0         | 0         | 42.0922   | 0         | 0         | 184.068   | 150.617   | 46.5131    | 52.7272    | 0          | 1-acyl-sn-glycerol-3-phosphate acyltransferase, putative (LPAAT)                           |
| PVX_118285 | 0         | 0         | 0         | 0         | 0         | 0         | 0         | 0         | 0         | 74.6722    | 0          | 0          | hypothetical protein, conserved                                                            |
| PVX_118290 | 0         | 0         | 0         | 0         | 0         | 0         | 0         | 0         | 0         | 0          | 0          | 2.63254    | hypothetical protein, conserved                                                            |
| PVX_118292 | 0         | 0         | 0         | 0         | 0         | 0         | 0         | 0         | 0         | 0          | 0          | 0          | conserved Plasmodium protein, unknown function                                             |
| PVX_118295 | 0         | 40.6547   | 72.3793   | 0         | 9.23344   | 0         | 0         | 0         | 44.1334   | 10.2344    | 34.7824    | 47.1288    | heat shock protein, putative                                                               |
| PVX_118300 | 49.3959   | 0         | 0         | 0         | 15.6678   | 252.751   | 0         | 0         | 37.4305   | 17.3559    | 29.4964    | 0          | hypothetical protein, conserved                                                            |
| PVX_118305 | 143.936   | 0         | 0         | 0         | 45.7608   | 0         | 0         | 0         | 54.5704   | 50.5498    | 0          | 0          | dephospho-CoA kinase, putative (DPCK)                                                      |
| PVX_118310 | 0         | 0         | 0         | 53.0596   | 0         | 0         | 0         | 0         | 0         | 0          | 0          | 0          | gamma-tubulin complex component, putative                                                  |
| PVX_118315 | 0         | 23.699    | 84.391    | 0         | 10.7656   | 0         | 0         | 94.2917   | 64.3153   | 47.7238    | 20.2747    | 0          | poly(A)-specific ribonuclease PARN, putative                                               |
| PVX_118320 | 72.4421   | 101.13    | 0         | 0         | 11.4852   | 0         | 0         | 0         | 68.6114   | 76.3655    | 93.7246    | 58.6234    | WD domain, G-beta repeat domain containing protein                                         |
| PVX_118325 | 0         | 0         | 0         | 0         | 0         | 0         | 0         | 367.656   | 100.242   | 92.7235    | 210.398    | 0          | U6 snRNA-associated Sm-like protein L5m5, putative                                         |
| PVX_118330 | 56.3647   | 0         | 0         | 0         | 0         | 0         | 0         | 0         | 0         | 19.8038    | 22.4387    | 0          | hypothetical protein, conserved                                                            |
| PVX_118335 | 80.4523   | 0         | 0         | 0         | 0         | 0         | 0         | 0         | 0         | 0          | 0          | 32.0273    | hypothetical protein, conserved                                                            |
| PVX_118340 | 0         | 0         | 57.8516   | 74.3594   | 0         | 0         | 0         | 0         | 0         | 8.18178    | 9.26845    | 0          | serine/threonine protein kinase, putative (SRPK2)                                          |
| PVX_118345 | 18.9069   | 6.59626   | 0         | 0         | 5.99117   | 0         | 0         | 26.2466   | 14.323    | 13.289     | 11.2895    | 15.2888    | protein transport protein SEC7, putative (SEC7)                                            |
| PVX_118350 | 0         | 0         | 0         | 0         | 0         | 0         | 0         | 86.3335   | 0         | 65.5166    | 61.8637    | 0          | hypothetical protein, conserved                                                            |
| PVX_118355 | 0         | 0         | 0         | 0         | 0         | 0         | 0         | 0         | 0         | 0          | 4.97645    | 0          | hypothetical protein                                                                       |
| PVX_118360 | 11.5613   | 0         | 0         | 0         | 3.66372   | 0         | 0         | 32.0996   | 4.37925   | 0          | 4.60228    | 0          | TRAP-like protein (TREP)                                                                   |
| PVX_118365 | 0         | 26.9755   | 0         | 0         | 0         | 0         | 0         | 0         | 43.923    | 27.1586    | 7.69217    | 0          | protein prenyltransferase alpha subunit, putative                                          |
| PVX_118370 | 0         | 0         | 0         | 0         | 7.1881    | 0         | 0         | 31.4894   | 4.29599   | 3.98576    | 15.8018    | 0          | hypothetical protein, conserved                                                            |
| PVX_118375 | 0         | 81.0558   | 0         | 0         | 92.0775   | 297.091   | 177.568   | 241.856   | 87.9763   | 183.55     | 127.095    | 0          | methionine-tRNA ligase, putative                                                           |
| PVX_118380 | 32.3811   | 0         | 0         | 0         | 0         | 0         | 0         | 0         | 0         | 0          | 25.7809    | 0          | GTP-binding protein, putative                                                              |
| PVX_118385 | 194.653   | 0         | 0         | 0         | 61.9623   | 0         | 0         | 270.71    | 73.8245   | 136.688    | 232.516    | 0          | replication factor A protein 3, putative (RPA3)                                            |
| PVX_118390 | 86.4874   | 60.4075   | 0         | 0         | 0         | 0         | 0         | 0         | 65.5538   | 91.1483    | 86.0797    | 140.177    | ADP-ribosylation-like factor, putative                                                     |
| PVX_118395 | 0         | 0         | 0         | 0         | 0         | 0         | 0         | 0         | 0         | 0          | 1166.19    | 0          | REX1 DNA repair protein, putative                                                          |
| PVX_118400 | 120.488   | 0         | 0         | 0         | 38.2841   | 617.835   | 0         | 0         | 0         | 84.6399    | 47.9702    | 0          | vacuolar-sorting protein SNF7, putative                                                    |
| PVX_118405 | 71.666    | 0         | 0         | 0         | 0         | 0         | 0         | 0         | 0         | 75.5338    | 14.2654    | 0          | metalloprotease, putative                                                                  |
| PVX_118410 | 56.047    | 39.1309   | 0         | 0         | 0         | 0         | 0         | 0         | 84.9448   | 19.6922    | 22.3122    | 0          | hypothetical protein, conserved                                                            |
| PVX_118415 | 0         | 0         | 0         | 0         | 0         | 0         | 0         | 0         | 0         | 0          | 11.0045    | 0          | hypothetical protein, conserved                                                            |
| PVX_118420 | 132.142   | 30.7482   | 0         | 0         | 41.9083   | 0         | 67.3419   | 122.335   | 16.6881   | 61.908     | 96.4419    | 0          | FACT complex subunit SRP1, putative (FACT-5)                                               |
| PVX_118425 | 0         | 0         | 0         | 0         | 0         | 0         | 0         | 0         | 0         | 0          | 0          | 0          | serine/threonine protein kinase, putative                                                  |
| PVX_118430 | 624.109   | 373.651   | 0         | 0         | 56.6151   | 0         | 546.025   | 247.734   | 540.637   | 344.528    | 496.936    | 144.517    | 60S ribosomal protein L10a, putative                                                       |
| PVX_118435 | 321.411   | 617.301   | 0         | 257.038   | 127.531   | 823.068   | 245.979   | 446.494   | 365.409   | 649.257    | 703.765    | 130.211    | KS1 protein precursor, putative                                                            |
| PVX_118440 | 0         | 0         | 0         | 0         | 0         | 0         | 0         | 0         | 0         | 0          | 0          | 0          | hypothetical protein, conserved                                                            |
| PVX_118445 | 0         | 0         | 0         | 0         | 0         | 0         | 0         | 0         | 0         | 0          | 0          | 0          | hypothetical protein, conserved                                                            |
| PVX_118450 | 0         | 28.3343   | 0         | 129.701   | 38.6166   | 0         | 124.102   | 0         | 30.7566   | 42.7885    | 96.9535    | 0          | transporter, putative                                                                      |
| PVX_118455 | 42.8453   | 89.726    | 0         | 0         | 27.1756   | 0         | 0         | 59.4975   | 48.6978   | 15.0547    | 196.148    | 0          | clathrin coat assembly protein AP50, putative                                              |
| PVX_118460 | 0         | 0         | 0         | 0         | 0         | 0         | 0         | 0         | 0         | 0          | 0          | 0          | hypothetical protein, conserved                                                            |
| PVX_118465 | 0         | 0         | 0         | 0         | 0         | 0         | 0         | 0         | 0         | 0          | 12.8735    | 0          | allantoicase, putative                                                                     |
| PVX_118470 | 26.7964   | 0         | 0         | 0         | 0         | 0         | 0         | 0         | 0         | 0          | 0          | 0          | hypothetical protein, conserved                                                            |
| PVX_118475 | 0         | 0         | 101.165   | 0         | 0         | 0         | 0         | 0         | 0         | 14.3089    | 8.10453    | 32.9362    | stromal-processing peptidase, putative (SPP)                                               |
| PVX_118480 | 0         | 0         | 120.691   | 0         | 0         | 0         | 0         | 0         | 0         | 0          | 19.323     | 78.5864    | delta-aminolevulinic acid dehydratase, putative, porphobilinogen synthase, putative (PBG5) |
| PVX_118485 | 0         | 19.4898   | 0         | 0         | 0         | 0         | 0         | 0         | 0         | 0          | 38.908     | 0          | hypothetical protein, conserved                                                            |
| PVX_118490 | 0         | 0         | 0         | 0         | 0         | 0         | 0         | 0         | 5.82091   | 0          | 12.2345    | 0          | hypothetical protein, conserved                                                            |
| PVX_118495 | 932.485   | 723.824   | 1032.1    | 0         | 329.074   | 531.016   | 476.114   | 719.82    | 1217.38   | 1128.23    | 494.992    | 0          | triosephosphate isomerase, putative                                                        |
| PVX_118500 | 173.183   | 0         | 0         | 0         | 0         | 0         | 0         | 0         | 131.343   | 60.8121    | 34.4772    | 0          | vesicle-associated membrane protein, putative                                              |
| PVX_118505 | 0         | 0         | 255.063   | 0         | 32.5298   | 0         | 156.882   | 0         | 77.6413   | 0          | 20.3886    | 0          | leucine carboxyl methyltransferase, putative                                               |
| PVX_118510 | 0         | 66.6636   | 0         | 0         | 0         | 0         | 0         | 265.186   | 36.1695   | 33.524     | 170.973    | 0          | hypothetical protein, conserved                                                            |
| PVX_118515 | 0         | 0         | 63.5603   | 81.697    | 0         | 0         | 0         | 0         | 0         | 0          | 40.7296    | 0          | histone, putative                                                                          |
| PVX_118520 | 102.777   | 0         | 255.944   | 0         | 97.9265   | 0         | 0         | 0         | 155.818   | 144.409    | 184.13     | 0          | ubiquinol cytochrome c oxidoreductase, putative                                            |
| PVX_118525 | 0         | 12.7694   | 0         | 0         | 0         | 0         | 27.9528   | 0         | 20.7945   | 6.43041    | 21.8527    | 0          | hypothetical protein, conserved                                                            |

| Gene ID    | Patient | Patient 1 | Patient 2 | Patient 3 | Patient 4 | Patient 5 | Patient 6 | Patient 7 | Patient 8 | Patient 9 | Patient 10 | Patient 11 | Patient 12 | Gene Description                                                                                                 |
|------------|---------|-----------|-----------|-----------|-----------|-----------|-----------|-----------|-----------|-----------|------------|------------|------------|------------------------------------------------------------------------------------------------------------------|
| PVX_118530 |         | 0         | 0         | 0         | 0         | 0         | 0         | 0         | 70.3641   | 0         | 0          | 65.5672    | 0          | hypothetical protein, conserved                                                                                  |
| PVX_118535 |         | 0         | 8.77473   | 31.2362   | 40.1494   | 11.9551   | 0         | 0         | 0         | 9.52651   | 17.6769    | 15.0174    | 0          | RNA helicase, putative                                                                                           |
| PVX_118540 |         | 61.8579   | 0         | 153.867   | 0         | 19.6266   | 0         | 0         | 0         | 70.3167   | 0          | 24.6257    | 100.189    | copper transporter, putative                                                                                     |
| PVX_118545 |         | 2325.97   | 651.058   | 2325.44   | 2241.75   | 815.206   | 0         | 1073.26   | 1294.4    | 1323.57   | 1877.97    | 1806.05    | 378.545    | thioredoxin peroxidase 1, putative (TPx1)                                                                        |
| PVX_118550 |         | 68.5575   | 23.926    | 0         | 0         | 0         | 0         | 0         | 47.5974   | 25.9725   | 24.0904    | 6.82296    | 0          | hypothetical protein                                                                                             |
| PVX_118560 |         | 0         | 54.3594   | 0         | 0         | 0         | 0         | 0         | 108.126   | 29.4968   | 27.3451    | 61.9752    | 0          | DNA primase small subunit, putative                                                                              |
| PVX_118565 |         | 0         | 0         | 0         | 0         | 0         | 0         | 0         | 197.218   | 0         | 249.145    | 84.7344    | 0          | conserved protein, unknown function                                                                              |
| PVX_118570 |         | 0         | 20.0074   | 0         | 0         | 0         | 0         | 0         | 0         | 13.0312   | 0          | 2.28219    | 0          | cleavage and polyadenylation specificity factor, putative                                                        |
| PVX_118575 |         | 31.969    | 0         | 39.7092   | 0         | 0         | 0         | 0         | 0         | 6.05487   | 0          | 6.36308    | 0          | metacaspase 2, putative                                                                                          |
| PVX_118580 |         | 55.4222   | 116.083   | 137.834   | 0         | 52.7455   | 0         | 84.7631   | 76.972    | 146.996   | 175.254    | 121.349    | 448.743    | translocation protein sec62, putative                                                                            |
| PVX_118585 |         | 0         | 0         | 0         | 0         | 0         | 0         | 0         | 0         | 0         | 0          | 0          | 0          | 50S ribosomal protein L20, putative                                                                              |
| PVX_118590 |         | 0         | 0         | 17.6056   | 0         | 0         | 0         | 0         | 39.3615   | 8.05504   | 9.96498    | 7.05458    | 11.4636    | hypothetical protein, conserved                                                                                  |
| PVX_118595 |         | 69.489    | 0         | 0         | 111.001   | 22.0332   | 0         | 0         | 0         | 13.1628   | 24.4177    | 6.91568    | 0          | DNA repair metallo-beta-lactamase protein, putative                                                              |
| PVX_118600 |         | 0         | 0         | 0         | 0         | 0         | 0         | 0         | 0         | 0         | 0          | 0          | 8.68401    | hypothetical protein, conserved                                                                                  |
| PVX_118605 |         | 0         | 37.1739   | 0         | 0         | 0         | 0         | 0         | 0         | 40.3489   | 130.958    | 52.9926    | 0          | hypothetical protein, conserved                                                                                  |
| PVX_118610 |         | 52.806    | 36.8666   | 0         | 168.789   | 16.7508   | 0         | 0         | 146.673   | 40.0155   | 111.323    | 31.5329    | 0          | hypothetical protein, conserved                                                                                  |
| PVX_118615 |         | 43.9824   | 0         | 109.348   | 0         | 0         | 0         | 67.2424   | 0         | 0         | 0          | 0          | 78.7907    | hypothetical protein, conserved                                                                                  |
| PVX_118620 |         | 171.977   | 60.0588   | 428.073   | 275.111   | 109.196   | 0         | 394.92    | 238.919   | 325.878   | 271.869    | 393.684    | 0          | proteasome subunit alpha type-1, putative                                                                        |
| PVX_118625 |         | 0         | 0         | 0         | 0         | 34.5516   | 0         | 0         | 302.291   | 41.2288   | 38.2072    | 21.6526    | 0          | trailer hitch homolog, putative (CITH)                                                                           |
| PVX_118630 |         | 0         | 0         | 0         | 0         | 0         | 0         | 0         | 0         | 0         | 0          | 0          | 0          | hypothetical protein, conserved                                                                                  |
| PVX_118635 |         | 0         | 15.7926   | 56.2268   | 0         | 0         | 0         | 34.5733   | 0         | 42.8614   | 31.8087    | 27.0249    | 0          | hypothetical protein, conserved                                                                                  |
| PVX_118640 |         | 69.2739   | 72.5285   | 0         | 110.657   | 0         | 0         | 0         | 96.19     | 52.488    | 24.3421    | 110.308    | 0          | hypothetical protein, conserved                                                                                  |
| PVX_118645 |         | 0         | 0         | 0         | 0         | 31.1024   | 0         | 0         | 0         | 0         | 68.8082    | 0          | 158.79     | cytochrome c oxidase assembly protein COX11, putative (COX11)                                                    |
| PVX_118648 |         | 5.45035   | 0         | 0         | 0         | 1.72692   | 0         | 0         | 0         | 0         | 1.91547    | 2.16963    | 0          | hypothetical protein, conserved                                                                                  |
| PVX_118650 |         | 0         | 0         | 0         | 0         | 0         | 97.8053   | 0         | 0         | 7.24716   | 0          | 0          | 0          | LCCL domain-containing protein (CCp1)                                                                            |
| PVX_118655 |         | 0         | 29.9087   | 0         | 136.912   | 0         | 0         | 0         | 0         | 16.2326   | 30.1095    | 42.6409    | 0          | bromodomain protein, putative                                                                                    |
| PVX_118660 |         | 67.7592   | 0         | 0         | 0         | 0         | 0         | 0         | 0         | 0         | 0          | 13.4876    | 0          | tubulin epsilon chain, putative                                                                                  |
| PVX_118665 |         | 0         | 0         | 0         | 0         | 0         | 0         | 0         | 0         | 0         | 0          | 0          | 0          | hypothetical protein, conserved                                                                                  |
| PVX_118670 |         | 0         | 41.5528   | 0         | 0         | 0         | 0         | 0         | 0         | 0         | 0          | 11.8461    | 0          | hypothetical protein, conserved                                                                                  |
| PVX_118675 |         | 0         | 0         | 0         | 0         | 0         | 0         | 0         | 0         | 0         | 0          | 0          | 0          | hypothetical protein                                                                                             |
| PVX_118680 |         | 0         | 0         | 0         | 0         | 0         | 0         | 0         | 0         | 0         | 0          | 0          | 0          | early transcribed membrane protein (ETRAMP)                                                                      |
| PVX_118682 |         | 0         | 0         | 0         | 0         | 0         | 0         | 0         | 0         | 0         | 0          | 0          | 0          | erythrocyte membrane protein 3, putative                                                                         |
| PVX_118685 |         | 0         | 231.419   | 0         | 0         | 0         | 849.776   | 0         | 0         | 62.7537   | 0          | 0          | 0          | Plasmodium exported protein, unknown function                                                                    |
| PVX_118690 |         | 0         | 89.3744   | 0         | 0         | 0         | 655.947   | 0         | 0         | 96.9644   | 0          | 25.4592    | 0          | 40 kDa heat shock protein, putative                                                                              |
| PVX_118695 |         | 234.56    | 444.378   | 0         | 107.049   | 53.122    | 514.131   | 153.638   | 139.583   | 63.4723   | 105.972    | 100.045    | 0          | Pv-fam-d protein                                                                                                 |
| PVX_118700 |         | 0         | 0         | 0         | 0         | 0         | 0         | 0         | 0         | 0         | 20.7853    | 11.7756    | 0          | PST-A protein                                                                                                    |
| PVX_118705 |         | 0         | 111.635   | 0         | 0         | 0         | 0         | 0         | 0         | 121.15    | 56.1547    | 31.8179    | 0          | hypothetical protein, conserved                                                                                  |
| PVX_119205 |         | 0         | 0         | 0         | 0         | 0         | 0         | 0         | 0         | 0         | 0          | 0          | 0          | VIR protein,PIR protein                                                                                          |
| PVX_119210 |         | 0         | 0         | 0         | 0         | 0         | 0         | 0         | 0         | 0         | 0          | 0          | 7.82051    | variant surface protein Vir22/5/24, putative,PIR protein                                                         |
| PVX_119215 |         | 0         | 0         | 0         | 0         | 0         | 0         | 0         | 0         | 0         | 0          | 0          | 19.2017    | VIR protein,PIR protein                                                                                          |
| PVX_119220 |         | 112.375   | 353.063   | 139.741   | 0         | 17.825    | 287.563   | 0         | 156.072   | 255.475   | 217.158    | 111.841    | 0          | Plasmodium exported protein, unknown function                                                                    |
| PVX_119225 |         | 70.1493   | 293.914   | 0         | 0         | 44.5236   | 359.166   | 107.337   | 194.879   | 132.911   | 197.162    | 125.671    | 113.644    | Plasmodium exported protein, unknown function                                                                    |
| PVX_119230 |         | 129.255   | 135.38    | 0         | 0         | 61.5201   | 0         | 0         | 0         | 122.444   | 90.8239    | 38.5926    | 0          | Plasmodium exported protein, unknown function                                                                    |
| PVX_119235 |         | 0         | 0         | 0         | 0         | 0         | 0         | 0         | 0         | 0         | 0          | 0          | 0          | Plasmodium exported protein, unknown function                                                                    |
| PVX_119240 |         | 0         | 0         | 0         | 0         | 0         | 0         | 0         | 0         | 36.7978   | 34.1056    | 57.9802    | 0          | hypothetical protein, conserved                                                                                  |
| PVX_119245 |         | 90.6833   | 63.3046   | 0         | 0         | 0         | 0         | 0         | 0         | 34.3574   | 79.6585    | 0          | 0          | splicing regulatory protein, putative                                                                            |
| PVX_119250 |         | 0         | 0         | 0         | 71.9433   | 7.14052   | 115.173   | 0         | 156.379   | 34.1337   | 47.4969    | 49.3212    | 0          | serine/threonine protein kinase (SRPK1)                                                                          |
| PVX_119255 |         | 22.9956   | 0         | 57.1376   | 0         | 0         | 0         | 0         | 31.9269   | 8.71107   | 8.08088    | 9.15413    | 0          | ATP-dependent transporter, putative                                                                              |
| PVX_119260 |         | 0         | 0         | 0         | 0         | 50.0416   | 0         | 0         | 0         | 298.305   | 55.2566    | 156.622    | 0          | hypothetical protein, conserved                                                                                  |
| PVX_119265 |         | 66.2543   | 138.791   | 0         | 0         | 0         | 0         | 202.729   | 92.0257   | 125.527   | 46.5546    | 26.3761    | 0          | hypothetical protein, conserved                                                                                  |
| PVX_119270 |         | 48.3388   | 0         | 60.0561   | 154.386   | 7.6615    | 123.578   | 36.9281   | 134.228   | 27.4673   | 33.9732    | 48.107     | 0          | exportin-1, putative                                                                                             |
| PVX_119275 |         | 71.8028   | 75.1775   | 0         | 114.701   | 0         | 0         | 0         | 49.8514   | 40.8034   | 50.4611    | 78.6055    | 58.1055    | N-ethylmaleimide-sensitive fusion protein, putative                                                              |
| PVX_119280 |         | 0         | 0         | 0         | 0         | 0         | 0         | 0         | 31.0258   | 8.46523   | 0          | 0          | 0          | hypothetical protein, conserved                                                                                  |
| PVX_119285 |         | 27.3868   | 0         | 0         | 87.4766   | 17.3642   | 0         | 0         | 0         | 0         | 19.2475    | 43.609     | 0          | HAD superfamily protein, putative                                                                                |
| PVX_119290 |         | 255.784   | 446.872   | 0         | 0         | 40.644    | 0         | 0         | 0         | 145.447   | 224.594    | 76.3777    | 0          | DNA-directed RNA polymerases I, II, and III 14.4 kDa polypeptide, putative                                       |
| PVX_119295 |         | 0         | 0         | 0         | 0         | 0         | 0         | 0         | 76.123    | 20.7678   | 0          | 10.9101    | 0          | palmitoyltransferase, putative (DHHC1)                                                                           |
| PVX_119300 |         | 15.7566   | 0         | 0         | 0         | 0         | 0         | 0         | 0         | 5.96851   | 0          | 0          | 0          | hypothetical protein, conserved                                                                                  |
| PVX_119305 |         | 262.537   | 0         | 0         | 0         | 0         | 0         | 0         | 0         | 99.5268   | 0          | 52.2631    | 213.026    | thioredoxin-like redox-active protein, putative                                                                  |
| PVX_119310 |         | 77.6342   | 0         | 386.391   | 0         | 24.6417   | 0         | 0         | 0         | 0         | 0          | 92.7209    | 125.797    | lipoamide acyltransferase component of branched-chain alpha-keto acid dehydrogenase complex, putative (BCKDH-E2) |
| PVX_119315 |         | 0         | 0         | 0         | 0         | 0         | 0         | 0         | 0         | 0         | 0          | 51.4319    | 0          | hypothetical protein, conserved                                                                                  |
| PVX_119320 |         | 0         | 0         | 0         | 0         | 0         | 0         | 0         | 0         | 0         | 0          | 0          | 0          | phosphatidylethanolamine-binding protein, putative                                                               |
| PVX_119325 |         | 0         | 0         | 0         | 0         | 0         | 0         | 0         | 0         | 0         | 0          | 0          | 0          | inner membrane complex protein 1a, putative (IMC1a)                                                              |

| Gene ID    | Patient 1 | Patient 2 | Patient 3 | Patient 4 | Patient 5 | Patient 6 | Patient 7 | Patient 8 | Patient 9 | Patient 10 | Patient 11 | Patient 12 | Gene Description                                                     |
|------------|-----------|-----------|-----------|-----------|-----------|-----------|-----------|-----------|-----------|------------|------------|------------|----------------------------------------------------------------------|
| Patient    |           |           |           |           |           |           |           |           |           |            |            |            |                                                                      |
| PVX_119330 | 0         | 0         | 0         | 0         | 0         | 0         | 0         | 0         | 24.4007   | 0          | 0          | 0          | inner membrane complex protein 1e, putative (IMC1e)                  |
| PVX_119335 | 0         | 0         | 0         | 206.345   | 20.4771   | 0         | 0         | 0         | 0         | 22.6732    | 25.6913    | 0          | EH (for Eps15 Homology) domain containing protein                    |
| PVX_119340 | 0         | 0         | 0         | 0         | 0         | 0         | 0         | 0         | 19.182    | 0          | 15.1181    | 0          | hypothetical protein, conserved                                      |
| PVX_119345 | 607.234   | 1701.26   | 1520.79   | 0         | 387.63    | 3130.98   | 936.11    | 845.403   | 1152.36   | 1704.7     | 846.363    | 0          | 60S ribosomal protein L44, putative (RPL44)                          |
| PVX_119350 | 0         | 204.307   | 0         | 0         | 0         | 0         | 0         | 406.119   | 0         | 102.382    | 0          | 0          | 1-cys-glutaredoxin-like protein-1, putative                          |
| PVX_119355 | 0         | 0         | 0         | 0         | 0         | 0         | 0         | 0         | 0         | 0          | 0          | 0          | circumsporozoite (CS) protein (CSP)                                  |
| PVX_119360 | 0         | 0         | 0         | 0         | 0         | 0         | 0         | 0         | 27.7576   | 0          | 0          | 0          | hypothetical protein                                                 |
| PVX_119365 | 29.0964   | 40.615    | 0         | 0         | 0         | 0         | 133.389   | 0         | 0         | 0          | 0          | 0          | hypothetical protein, conserved                                      |
| PVX_119370 | 1144.57   | 200.373   | 716.28    | 0         | 182.582   | 0         | 0         | 0         | 217.182   | 301.262    | 626.712    | 0          | hypothetical protein, conserved                                      |
| PVX_119375 | 92.2843   | 0         | 0         | 0         | 0         | 0         | 0         | 0         | 69.9505   | 32.4183    | 55.11      | 0          | elongation factor (EF-TS), putative                                  |
| PVX_119380 | 16.4438   | 11.4737   | 40.8412   | 0         | 5.21052   | 0         | 25.1115   | 0         | 6.22851   | 8.66841    | 16.3646    | 0          | hypothetical protein, conserved                                      |
| PVX_119385 | 31.3929   | 0         | 0         | 100.284   | 19.9061   | 0         | 0         | 0         | 0         | 44.1251    | 12.4971    | 0          | hypothetical protein, conserved                                      |
| PVX_119390 | 0         | 135.169   | 0         | 0         | 24.5623   | 198.107   | 59.201    | 0         | 44.0181   | 40.826     | 53.9617    | 0          | hypothetical protein, conserved                                      |
| PVX_119395 | 305.044   | 106.62    | 0         | 0         | 0         | 0         | 0         | 424.058   | 173.487   | 160.688    | 212.543    | 247.665    | hypothetical protein, conserved                                      |
| PVX_119400 | 24.7681   | 17.282    | 41.0108   | 0         | 2.61608   | 0         | 0         | 0         | 21.8903   | 11.6059    | 27.9353    | 13.3518    | hypothetical protein, conserved                                      |
| PVX_119405 | 0         | 0         | 0         | 0         | 0         | 0         | 0         | 0         | 0         | 0          | 50.7242    | 0          | AP endonuclease (DNA-[apurinic or pyrimidinic site] lyase), putative |
| PVX_119410 | 268.042   | 187.33    | 668.091   | 1288.09   | 42.5981   | 0         | 205.487   | 745.103   | 406.462   | 329.49     | 453.551    | 0          | ubiquitin-conjugating enzyme E2, putative                            |
| PVX_119415 | 0         | 25.1095   | 0         | 0         | 0         | 0         | 0         | 0         | 13.6285   | 0          | 0          | 0          | hypothetical protein, conserved                                      |
| PVX_119420 | 0         | 0         | 0         | 0         | 86.2896   | 0         | 416.669   | 0         | 0         | 0          | 0          | 440.82     | hypothetical protein, conserved                                      |
| PVX_119425 | 0         | 0         | 0         | 0         | 0         | 0         | 0         | 0         | 0         | 0          | 38.5014    | 0          | hypothetical protein, conserved                                      |
| PVX_119430 | 0         | 0         | 0         | 0         | 0         | 0         | 0         | 0         | 0         | 0          | 0          | 0          | hypothetical protein, conserved                                      |
| PVX_119435 | 0         | 48.8707   | 0         | 223.807   | 66.6285   | 0         | 107.085   | 97.2107   | 106.079   | 196.7      | 222.891    | 0          | activator of Hsp90 ATPase, putative (AHA1)                           |
| PVX_119440 | 310.333   | 108.473   | 0         | 0         | 0         | 0         | 476.138   | 215.711   | 294.163   | 490.417    | 494.237    | 0          | glutaredoxin 1, putative                                             |
| PVX_119445 | 0         | 35.4033   | 0         | 0         | 0         | 0         | 0         | 70.4263   | 38.4277   | 17.818     | 80.7521    | 0          | FAD-dependent glycerol-3-phosphate dehydrogenase, putative           |
| PVX_119450 | 0         | 0         | 0         | 0         | 39.7884   | 0         | 191.921   | 348.024   | 0         | 87.9535    | 199.399    | 0          | hypothetical protein, conserved                                      |
| PVX_119455 | 0         | 0         | 0         | 0         | 0         | 0         | 0         | 329.61    | 89.8757   | 83.162     | 47.1674    | 0          | hypothetical protein, conserved                                      |
| PVX_119460 | 82.644    | 28.8448   | 0         | 132.039   | 0         | 0         | 0         | 46.966    | 72.598    | 32.8998    | 0          | 0          | hypothetical protein, conserved                                      |
| PVX_119465 | 192.355   | 134.312   | 159.5     | 205.013   | 40.6897   | 0         | 294.27    | 445.284   | 315.844   | 337.906    | 395.647    | 103.856    | T-complex protein 1, beta subunit, putative                          |
| PVX_119470 | 2287.3    | 267.276   | 2870.53   | 4919.51   | 853.36    | 0         | 1178.3    | 2124.57   | 4922.05   | 3075.61    | 3416.1     | 1246.07    | 40S ribosomal protein S23, putative                                  |
| PVX_119475 | 226.705   | 634.517   | 0         | 0         | 144.444   | 2332.42   | 1394.5    | 1576.92   | 687.994   | 1193.77    | 722.169    | 0          | 40S ribosomal protein S12, putative                                  |
| PVX_119480 | 496.887   | 594.829   | 176.613   | 454.018   | 202.744   | 0         | 325.851   | 788.796   | 645.565   | 773.09     | 692.349    | 459.996    | 60S ribosomal protein L7, putative                                   |
| PVX_119485 | 0         | 0         | 0         | 0         | 0         | 0         | 0         | 0         | 22.916    | 0          | 12.0383    | 0          | microtubule associated protein EB1, putative                         |
| PVX_119490 | 84.9279   | 0         | 0         | 0         | 0         | 0         | 0         | 235.969   | 0         | 29.8352    | 67.622     | 137.643    | ATP-dependent Clp protease proteolytic subunit, putative             |
| PVX_119495 | 74.1603   | 51.7893   | 0         | 0         | 47.074    | 0         | 226.978   | 0         | 0         | 0          | 73.8095    | 0          | hypothetical protein, conserved                                      |
| PVX_119500 | 46.3035   | 0         | 0         | 0         | 29.3716   | 0         | 0         | 0         | 52.6297   | 0          | 46.0828    | 0          | hypothetical protein, conserved                                      |
| PVX_119505 | 18.4342   | 0         | 0         | 0         | 5.84266   | 0         | 0         | 0         | 6.9829    | 0          | 11.0074    | 0          | hypothetical protein, conserved                                      |
| PVX_119510 | 52.1293   | 0         | 129.633   | 0         | 33.0718   | 0         | 159.437   | 72.3964   | 39.5025   | 18.3161    | 114.139    | 84.4085    | hypothetical protein, conserved                                      |
| PVX_119515 | 0         | 0         | 0         | 0         | 2.56009   | 0         | 0         | 22.4314   | 3.06027   | 2.83939    | 3.21619    | 0          | hypothetical protein, conserved                                      |
| PVX_119520 | 66.6987   | 46.5741   | 0         | 0         | 21.165    | 0         | 102.046   | 277.93    | 75.8219   | 46.8668    | 119.489    | 216.087    | DNA polymerase delta small subunit, putative                         |
| PVX_119525 | 18.9856   | 0         | 0         | 0         | 0         | 0         | 0         | 0         | 0         | 0          | 7.55777    | 0          | hypothetical protein, conserved                                      |
| PVX_119530 | 149.926   | 34.889    | 372.805   | 479.184   | 31.7035   | 0         | 305.677   | 277.613   | 113.609   | 316.069    | 268.581    | 80.9156    | T-complex protein 1, eta subunit, putative                           |
| PVX_119535 | 0         | 0         | 0         | 0         | 0         | 0         | 0         | 0         | 0         | 0          | 20.6008    | 0          | hypothetical protein, conserved                                      |
| PVX_119540 | 0         | 0         | 0         | 0         | 106.76    | 0         | 0         | 0         | 126.883   | 117.269    | 0          | 0          | activator of Hsp90 ATPase, putative                                  |
| PVX_119545 | 111.674   | 0         | 0         | 0         | 0         | 0         | 0         | 77.5486   | 0         | 58.8554    | 22.2287    | 0          | pre-mRNA-processing factor 19, putative (PRPF19)                     |
| PVX_119550 | 0         | 0         | 0         | 0         | 0         | 0         | 0         | 0         | 0         | 0          | 31.0687    | 0          | hypothetical protein, conserved                                      |
| PVX_119555 | 0         | 0         | 0         | 0         | 224.739   | 0         | 0         | 0         | 265.404   | 0          | 0          | 0          | hypothetical protein, conserved                                      |
| PVX_119560 | 0         | 48.2938   | 57.3145   | 0         | 7.31178   | 0         | 0         | 0         | 52.4281   | 16.2118    | 18.3649    | 0          | splicing factor 3B subunit 1, putative                               |
| PVX_119565 | 60.9729   | 0         | 0         | 0         | 19.3453   | 0         | 0         | 0         | 46.2068   | 21.4224    | 157.777    | 98.7527    | dual specificity protein phosphatase, putative (VYH1)                |
| PVX_119570 | 0         | 0         | 0         | 0         | 0         | 0         | 0         | 0         | 0         | 0          | 55.0374    | 0          | hypothetical protein, conserved                                      |
| PVX_119575 | 0         | 0         | 0         | 0         | 0         | 0         | 0         | 0         | 0         | 0          | 0          | 0          | serine/threonine protein kinase 6, putative                          |
| PVX_119580 | 0         | 0         | 0         | 0         | 0         | 0         | 0         | 0         | 16.2794   | 15.0981    | 25.6582    | 0          | hypothetical protein, conserved                                      |
| PVX_119585 | 103.655   | 108.549   | 0         | 165.657   | 32.88     | 0         | 0         | 71.977    | 78.5474   | 163.89     | 134.11     | 0          | asparagine synthetase [glutamine-hydrolyzing], putative              |
| PVX_119587 | 2002.95   | 1879.23   | 0         | 0         | 1075      | 0         | 0         | 932.808   | 3302.4    | 3040.28    | 2261.03    | 2199.87    | 60S acidic ribosomal protein P2, putative                            |
| PVX_119590 | 0         | 51.2789   | 0         | 0         | 23.3048   | 0         | 0         | 0         | 0         | 77.3924    | 43.8496    | 0          | hypothetical protein, conserved                                      |
| PVX_119595 | 0         | 88.6133   | 0         | 0         | 0         | 0         | 0         | 0         | 96.1394   | 44.5372    | 25.2428    | 0          | YTH domain-containing protein, putative                              |
| PVX_119600 | 0         | 0         | 0         | 0         | 7.13513   | 0         | 0         | 0         | 0         | 7.91017    | 26.8822    | 0          | hypothetical protein, conserved                                      |
| PVX_119605 | 0         | 0         | 0         | 0         | 0         | 0         | 0         | 0         | 87.5542   | 0          | 91.9013    | 0          | hypothetical protein, conserved                                      |
| PVX_119610 | 0         | 0         | 0         | 0         | 0         | 0         | 0         | 0         | 0         | 0          | 0          | 0          | calcium-dependent protein kinase 3, putative                         |
| PVX_119615 | 7.45732   | 15.6099   | 37.0425   | 23.8062   | 7.08882   | 0         | 11.3879   | 10.3521   | 11.2985   | 18.3454    | 26.717     | 12.0598    | hypothetical protein, conserved                                      |
| PVX_119620 | 0         | 31.6091   | 56.2695   | 144.652   | 7.17848   | 0         | 0         | 0         | 34.3151   | 23.8746    | 45.0757    | 36.6391    | phosphoglycerate mutase, putative                                    |
| PVX_119625 | 0         | 0         | 0         | 0         | 0         | 0         | 0         | 0         | 10.6687   | 0          | 0          | 0          | hypothetical protein, conserved                                      |
| PVX_119630 | 145.927   | 61.0974   | 36.2501   | 93.188    | 46.2468   | 0         | 22.2892   | 121.552   | 121.607   | 66.6669    | 90.0397    | 47.2075    | DEAD box helicase, putative                                          |



| Gene ID    | Patient | Patient 1 | Patient 2 | Patient 3 | Patient 4 | Patient 5 | Patient 6 | Patient 7 | Patient 8 | Patient 9 | Patient 10 | Patient 11 | Patient 12 | Gene Description                                                   |                                                           |                                                           |
|------------|---------|-----------|-----------|-----------|-----------|-----------|-----------|-----------|-----------|-----------|------------|------------|------------|--------------------------------------------------------------------|-----------------------------------------------------------|-----------------------------------------------------------|
| PVX_119635 | 0       | 73.6634   | 0         | 0         | 0         | 33.4904   | 0         | 0         | 0         | 39.965    | 74.0749    | 41.9785    | 0          | eukaryotic translation initiation factor 3 subunit 11, putative    |                                                           |                                                           |
| PVX_119640 | 0       | 0         | 0         | 0         | 0         | 0         | 0         | 0         | 0         | 0         | 132.038    | 74.955     | 0          | trafficking protein particle complex subunit 4, putative (TRAPPC4) |                                                           |                                                           |
| PVX_119645 | 0       | 0         | 0         | 0         | 0         | 0         | 0         | 0         | 0         | 0         | 244.256    | 138.934    | 0          | hypothetical protein, conserved                                    |                                                           |                                                           |
| PVX_119650 | 0       | 0         | 0         | 0         | 0         | 0         | 0         | 0         | 0         | 0         | 0          | 0          | 0          | hypothetical protein, conserved                                    |                                                           |                                                           |
| PVX_119655 | 0       | 0         | 0         | 0         | 0         | 0         | 0         | 0         | 0         | 0         | 0          | 0          | 0          | hypothetical protein, conserved                                    |                                                           |                                                           |
| PVX_119660 | 0       | 82.6108   | 0         | 0         | 0         | 18.769    | 302.797   | 0         | 0         | 89.6635   | 41.5706    | 70.6538    | 0          | hypothetical protein, conserved                                    |                                                           |                                                           |
| PVX_119665 | 24.2283 | 16.9088   | 0         | 0         | 0         | 0         | 0         | 37.0181   | 0         | 27.5343   | 34.056     | 57.8691    | 0          | valine-tRNA ligase, putative                                       |                                                           |                                                           |
| PVX_119670 | 0       | 0         | 0         | 0         | 0         | 9.79825   | 0         | 0         | 42.9115   | 11.7079   | 43.4395    | 49.2114    | 0          | phosphatidylinositol 3- and 4-kinase, putative                     |                                                           |                                                           |
| PVX_119675 | 9.80669 | 0         | 0         | 0         | 0         | 0         | 0         | 13.6137   | 11.1437   | 3.44639   | 11.7114    | 0          | 0          | protein kinase domain containing protein                           |                                                           |                                                           |
| PVX_119680 | 211.69  | 296.189   | 0         | 679.681   | 67.4135   | 1088.48   | 650.759   | 0         | 0         | 80.295    | 297.277    | 210.727    | 0          | hypothetical protein, conserved                                    |                                                           |                                                           |
| PVX_119685 | 0       | 0         | 0         | 0         | 15.1084   | 0         | 0         | 66.151    | 18.0476   | 16.7371   | 0          | 0          | 0          | ribophorin I, putative                                             |                                                           |                                                           |
| PVX_119690 | 0       | 0         | 0         | 0         | 0         | 0         | 0         | 0         | 0         | 0         | 0          | 13.7056    | 111.542    | 0                                                                  | aspartyl proteinase, putative                             |                                                           |
| PVX_119695 | 58.8093 | 82.1219   | 0         | 188.01    | 0         | 0         | 0         | 89.953    | 0         | 44.5665   | 103.312    | 152.178    | 95.2426    | 0                                                                  | hypothetical protein, conserved                           |                                                           |
| PVX_119700 | 0       | 0         | 0         | 0         | 0         | 0         | 0         | 0         | 0         | 0         | 0          | 11.6144    | 0          | 0                                                                  | hypothetical protein, conserved                           |                                                           |
| PVX_119705 | 0       | 113.811   | 0         | 0         | 51.778    | 0         | 0         | 0         | 0         | 0         | 57.1648    | 0          | 0          | 0                                                                  | hypothetical protein, conserved                           |                                                           |
| PVX_119710 | 44.7745 | 0         | 0         | 0         | 42.601    | 0         | 0         | 248.711   | 84.8188   | 78.6624   | 160.42     | 72.4845    | 0          | 0                                                                  | E3 ubiquitin-protein ligase, putative                     |                                                           |
| PVX_119715 | 0       | 0         | 0         | 0         | 0         | 0         | 0         | 0         | 0         | 0         | 9.9244     | 0          | 0          | 0                                                                  | hypothetical protein, conserved                           |                                                           |
| PVX_119720 | 252.536 | 176.475   | 0         | 0         | 80.2526   | 0         | 0         | 350.974   | 239.33    | 310.441   | 402.174    | 204.882    | 0          | 0                                                                  | 26S proteasome regulatory subunit RPN12, putative (RPN12) |                                                           |
| PVX_119725 | 0       | 0         | 0         | 0         | 0         | 0         | 0         | 96.983    | 26.4576   | 0         | 13.8981    | 0          | 0          | 0                                                                  | glycogen synthase kinase 3, putative (GSK3)               |                                                           |
| PVX_119735 | 0       | 44.4837   | 0         | 0         | 0         | 0         | 97.4603   | 88.4859   | 0         | 0         | 50.7242    | 103.189    | 0          | 0                                                                  | transporter, putative                                     |                                                           |
| PVX_119740 | 662.171 | 555.324   | 990.229   | 0         | 336.738   | 679.336   | 0         | 736.271   | 1154.73   | 697.696   | 632.726    | 644.774    | 0          | 0                                                                  | 60S ribosomal protein L26, putative                       |                                                           |
| PVX_119745 | 0       | 87.7791   | 0         | 200.974   | 0         | 0         | 0         | 174.609   | 71.4531   | 110.421   | 125.118    | 0          | 0          | 0                                                                  | hypothetical protein, conserved                           |                                                           |
| PVX_119750 | 41.533  | 28.9221   | 0         | 265.428   | 39.5136   | 212.468   | 126.985   | 0         | 125.882   | 58.3749   | 82.6695    | 0          | 0          | 0                                                                  | ubiquitin-protein ligase, putative                        |                                                           |
| PVX_119755 | 0       | 0         | 0         | 0         | 166.265   | 0         | 267.425   | 0         | 198.167   | 122.334   | 242.75     | 283.028    | 0          | 0                                                                  | 0                                                         | hypothetical protein, conserved                           |
| PVX_119760 | 0       | 175.088   | 0         | 0         | 0         | 0         | 0         | 0         | 0         | 0         | 199.221    | 0          | 0          | 0                                                                  | 0                                                         | hypothetical protein, conserved                           |
| PVX_119765 | 0       | 38.5511   | 0         | 0         | 0         | 0         | 0         | 153.374   | 41.8432   | 0         | 21.9818    | 89.4159    | 0          | 0                                                                  | 0                                                         | hypothetical protein, conserved                           |
| PVX_119770 | 42.6615 | 0         | 106.06    | 272.648   | 27.0589   | 0         | 65.2203   | 0         | 16.1629   | 59.9607   | 67.9327    | 69.0596    | 0          | 0                                                                  | 0                                                         | hypothetical protein, conserved                           |
| PVX_119775 | 51.3222 | 35.83     | 382.868   | 164.039   | 65.1182   | 0         | 313.929   | 0         | 311.125   | 198.358   | 143.018    | 83.0997    | 0          | 0                                                                  | 0                                                         | hypothetical protein, conserved                           |
| PVX_119780 | 54.0825 | 37.7584   | 0         | 0         | 0         | 0         | 82.7106   | 0         | 40.9832   | 38.0043   | 64.5904    | 87.5759    | 0          | 0                                                                  | 0                                                         | fusion protein, putative                                  |
| PVX_119785 | 0       | 0         | 0         | 0         | 15.0124   | 0         | 144.743   | 0         | 35.8661   | 83.1545   | 37.6852    | 0          | 0          | 0                                                                  | 0                                                         | hypothetical protein, conserved                           |
| PVX_119790 | 68.4788 | 0         | 170.204   | 0         | 10.8563   | 0         | 0         | 47.5428   | 38.9141   | 36.0941   | 40.8908    | 55.413     | 0          | 0                                                                  | 0                                                         | hypothetical protein, conserved                           |
| PVX_119795 | 0       | 85.3431   | 0         | 0         | 38.8081   | 0         | 0         | 169.732   | 0         | 128.691   | 121.562    | 0          | 0          | 0                                                                  | 0                                                         | co-chaperone p23, putative                                |
| PVX_119800 | 0       | 422.249   | 0         | 0         | 0         | 0         | 0         | 0         | 76.3177   | 0         | 40.0601    | 0          | 0          | 0                                                                  | 0                                                         | hypothetical protein, conserved                           |
| PVX_119805 | 0       | 0         | 0         | 0         | 0         | 0         | 0         | 0         | 0         | 0         | 16.7623    | 0          | 0          | 0                                                                  | 0                                                         | hypothetical protein                                      |
| PVX_119812 | 0       | 0         | 0         | 274.055   | 0         | 0         | 0         | 0         | 0         | 0         | 17.0511    | 0          | 0          | 0                                                                  | 0                                                         | DER1-like protein, putative                               |
| PVX_119813 | 25.6226 | 0         | 0         | 0         | 8.12244   | 0         | 0         | 35.575    | 48.5318   | 9.0039    | 10.1999    | 41.4575    | 0          | 0                                                                  | 0                                                         | hypothetical protein, conserved                           |
| PVX_119815 | 59.4737 | 83.0504   | 0         | 0         | 0         | 0         | 90.9712   | 82.6021   | 157.746   | 125.375   | 59.1912    | 0          | 0          | 0                                                                  | 0                                                         | serine/threonine protein phosphatase 6, putative (PPP6)   |
| PVX_119820 | 295.661 | 51.6181   | 0         | 0         | 70.3773   | 0         | 113.113   | 205.349   | 56.0198   | 181.775   | 205.984    | 0          | 0          | 0                                                                  | 0                                                         | conserved Plasmodium protein, unknown function            |
| PVX_119825 | 0       | 134.476   | 0         | 0         | 0         | 0         | 0         | 0         | 145.924   | 33.8123   | 38.3209    | 0          | 0          | 0                                                                  | 0                                                         | hypothetical protein, conserved                           |
| PVX_119830 | 0       | 0         | 0         | 0         | 0         | 0         | 0         | 0         | 0         | 0         | 0          | 0          | 0          | 0                                                                  | 0                                                         | hypothetical protein                                      |
| PVX_120330 | 0       | 0         | 0         | 0         | 0         | 0         | 0         | 0         | 32.1856   | 0         | 0          | 0          | 0          | 0                                                                  | 0                                                         | variable surface protein Vir14-related                    |
| PVX_120335 | 0       | 0         | 0         | 0         | 0         | 0         | 0         | 0         | 0         | 25.0576   | 14.1971    | 0          | 0          | 0                                                                  | 0                                                         | variable surface protein Vir18-related                    |
| PVX_120340 | 0       | 54.0769   | 0         | 0         | 0         | 0         | 0         | 0         | 0         | 0         | 0          | 0          | 0          | 0                                                                  | 0                                                         | variable surface protein Vir12-related                    |
| PVX_120840 | 0       | 81.0239   | 0         | 0         | 0         | 0         | 0         | 0         | 0         | 0         | 40.7306    | 0          | 0          | 0                                                                  | 0                                                         | variable surface protein Vir8-related                     |
| PVX_120845 | 0       | 0         | 0         | 0         | 9.0955    | 0         | 0         | 0         | 7.24207   | 0         | 0          | 0          | 0          | 0                                                                  | 0                                                         | variable surface protein Vir12-related                    |
| PVX_121345 | 0       | 0         | 0         | 0         | 0         | 0         | 0         | 0         | 0         | 0         | 0          | 0          | 0          | 0                                                                  | 0                                                         | variable surface protein Vir6, putative                   |
| PVX_121350 | 0       | 0         | 0         | 0         | 0         | 0         | 0         | 0         | 0         | 0         | 0          | 0          | 0          | 0                                                                  | 0                                                         | hypothetical protein                                      |
| PVX_121355 | 0       | 0         | 0         | 0         | 0         | 0         | 0         | 0         | 0         | 0         | 0          | 0          | 0          | 0                                                                  | 0                                                         | variable surface protein Vir15-like                       |
| PVX_121855 | 0       | 0         | 0         | 0         | 0         | 0         | 0         | 0         | 0         | 0         | 0          | 7.72674    | 0          | 0                                                                  | 0                                                         | variable surface protein Vir18, putative,PIR protein      |
| PVX_121860 | 0       | 0         | 0         | 0         | 0         | 0         | 0         | 0         | 0         | 0         | 0          | 0          | 0          | 0                                                                  | 0                                                         | hypothetical protein                                      |
| PVX_121862 | 0       | 0         | 0         | 0         | 0         | 0         | 0         | 0         | 0         | 0         | 0          | 0          | 0          | 0                                                                  | 0                                                         | VIR protein,PIR protein                                   |
| PVX_121865 | 0       | 0         | 0         | 0         | 0         | 0         | 0         | 0         | 0         | 0         | 0          | 0          | 0          | 0                                                                  | 0                                                         | RAD protein (Pv-fam-e)                                    |
| PVX_121870 | 0       | 403.548   | 0         | 0         | 0         | 0         | 0         | 0         | 0         | 0         | 0          | 0          | 0          | 0                                                                  | 0                                                         | Pv-fam-d protein                                          |
| PVX_121875 | 0       | 0         | 0         | 0         | 0         | 0         | 0         | 0         | 83.6643   | 0         | 0          | 0          | 0          | 0                                                                  | 0                                                         | hypothetical protein                                      |
| PVX_121876 | 0       | 134.766   | 0         | 0         | 0         | 0         | 0         | 0         | 0         | 0         | 33.8852    | 19.2017    | 0          | 0                                                                  | 0                                                         | Plasmodium exported protein, unknown function             |
| PVX_121877 | 0       | 83.9658   | 0         | 0         | 0         | 0         | 0         | 0         | 45.5504   | 42.2063   | 0          | 0          | 0          | 0                                                                  | 0                                                         | Plasmodium exported protein, unknown function             |
| PVX_121878 | 0       | 0         | 0         | 0         | 0         | 0         | 0         | 0         | 0         | 0         | 0          | 0          | 0          | 0                                                                  | 0                                                         | Plasmodium exported protein, unknown function, pseudogene |
| PVX_121879 | 0       | 0         | 0         | 0         | 0         | 0         | 0         | 0         | 0         | 0         | 78.0057    | 0          | 0          | 0                                                                  | 0                                                         | Plasmodium exported protein, unknown function             |
| PVX_121880 | 174.74  | 585.442   | 0         | 111.652   | 33.2435   | 178.746   | 53.4149   | 0         | 119.159   | 147.364   | 83.4743    | 56.561     | 0          | 0                                                                  | 0                                                         | Plasmodium exported protein, unknown function             |
| PVX_121885 | 0       | 0         | 0         | 0         | 0         | 0         | 0         | 0         | 0         | 0         | 0          | 0          | 0          | 0                                                                  | 0                                                         | cytoadherence linked asexual protein, CLAG, putative      |
| PVX_121890 | 295.437 | 1444.67   | 0         | 315.183   | 218.917   | 0         | 301.642   | 547.313   | 298.596   | 484.306   | 392.065    | 0          | 0          | 0                                                                  | 0                                                         | hypothetical protein, conserved                           |
| PVX_121895 | 0       | 969.009   | 0         | 0         | 294.132   | 1187.41   | 0         | 0         | 262.663   | 162.04    | 183.803    | 0          | 0          | 0                                                                  | 0                                                         | Plasmodium exported protein, unknown function             |

| Gene ID    | Patient 1 | Patient 2 | Patient 3 | Patient 4 | Patient 5 | Patient 6 | Patient 7 | Patient 8 | Patient 9 | Patient 10 | Patient 11 | Patient 12 | Gene Description                                                    |
|------------|-----------|-----------|-----------|-----------|-----------|-----------|-----------|-----------|-----------|------------|------------|------------|---------------------------------------------------------------------|
| PVX_121897 | 0         | 400.493   | 0         | 0         | 0         | 0         | 0         | 0         | 54.3081   | 0          | 57.0322    | 0          | tryptophan-rich antigen (Pv-fam-a)                                  |
| PVX_121900 | 0         | 0         | 0         | 0         | 0         | 0         | 0         | 0         | 55.3813   | 34.2394    | 9.69831    | 0          | PST-A protein                                                       |
| PVX_121905 | 0         | 0         | 0         | 0         | 0         | 0         | 0         | 0         | 101.139   | 93.5509    | 0          | 0          | hypothetical protein                                                |
| PVX_121910 | 0         | 372.27    | 265.421   | 0         | 135.401   | 0         | 326.512   | 148.083   | 80.7872   | 336.908    | 296.999    | 0          | Pv-fam-d protein                                                    |
| PVX_121912 | 94.6262   | 0         | 0         | 0         | 0         | 0         | 0         | 0         | 0         | 33.2406    | 0          | 0          | Plasmodium exported protein, unknown function                       |
| PVX_121915 | 0         | 0         | 0         | 0         | 0         | 0         | 0         | 0         | 43.9555   | 40.7306    | 0          | 0          | Plasmodium exported protein, unknown function                       |
| PVX_121920 | 12.3256   | 0         | 0         | 0         | 0         | 0         | 0         | 0         | 0         | 0          | 4.90654    | 0          | reticulocyte binding protein 2a (RBP2a)                             |
| PVX_121925 | 0         | 172.191   | 0         | 0         | 0         | 0         | 0         | 0         | 0         | 0          | 0          | 0          | hypothetical protein, conserved                                     |
| PVX_121927 | 0         | 0         | 0         | 0         | 0         | 0         | 0         | 0         | 0         | 0          | 0          | 0          | conserved Plasmodium protein, unknown function                      |
| PVX_121930 | 0         | 841.774   | 0         | 0         | 76.5188   | 0         | 0         | 0         | 274.056   | 141.143    | 127.957    | 0          | Plasmodium exported protein, unknown function                       |
| PVX_121935 | 1512.42   | 1386.61   | 0         | 0         | 330.173   | 2421.66   | 868.497   | 656.656   | 931.462   | 1128.99    | 602.123    | 306.482    | Plasmodium exported protein, unknown function                       |
| PVX_121940 | 0         | 0         | 0         | 0         | 0         | 0         | 0         | 0         | 32.7452   | 0          | 85.9966    | 0          | hypothetical protein                                                |
| PVX_121945 | 0         | 350.602   | 0         | 0         | 0         | 0         | 0         | 0         | 81.5368   | 50.3962    | 42.8304    | 0          | gap, putative                                                       |
| PVX_121950 | 0         | 0         | 0         | 0         | 0         | 0         | 0         | 0         | 0         | 0          | 0          | 0          | early transcribed membrane protein (ETRAMP)                         |
| PVX_121955 | 135.441   | 0         | 0         | 0         | 0         | 0         | 0         | 0         | 0         | 47.5683    | 26.9622    | 0          | hypothetical protein                                                |
| PVX_121960 | 0         | 0         | 0         | 0         | 0         | 0         | 0         | 0         | 0         | 0          | 35.7936    | 0          | hypothetical protein, conserved                                     |
| PVX_121965 | 11.5211   | 0         | 0         | 0         | 10.9529   | 0         | 35.1918   | 0         | 0         | 0          | 9.17256    | 18.6339    | hypothetical protein, conserved                                     |
| PVX_121970 | 53.5646   | 37.3966   | 0         | 0         | 16.9918   | 0         | 81.9172   | 0         | 0         | 131.741    | 85.2957    | 0          | hypothetical protein, conserved                                     |
| PVX_121975 | 0         | 26.8398   | 95.5539   | 0         | 0         | 0         | 0         | 14.5691   | 13.5157   | 15.3104    | 0          | 0          | DEAD/DEAH box ATP-dependent RNA helicase, putative                  |
| PVX_121980 | 517.484   | 813.687   | 644.828   | 828.828   | 452.271   | 1990.69   | 198.328   | 539.415   | 833.738   | 999.635    | 901.38     | 0          | 40S ribosomal protein S7, putative                                  |
| PVX_121985 | 73.0035   | 50.9568   | 0         | 0         | 0         | 0         | 0         | 0         | 41.486    | 25.6524    | 21.7964    | 0          | hypothetical protein, conserved                                     |
| PVX_121990 | 0         | 0         | 0         | 0         | 60.7671   | 0         | 0         | 265.503   | 72.4052   | 67.0332    | 0          | 0          | hypothetical protein, conserved                                     |
| PVX_121995 | 190.916   | 0         | 0         | 0         | 0         | 0         | 0         | 265.503   | 72.4052   | 201.1      | 266.06     | 0          | Putative N6-DNA-methyltransferase, putative                         |
| PVX_122000 | 0         | 0         | 0         | 0         | 67.2536   | 0         | 0         | 0         | 0         | 148.288    | 84.0917    | 0          | vesicle-associated membrane protein 714, putative,VAMP714, putative |
| PVX_122005 | 0         | 0         | 173.442   | 0         | 44.2457   | 0         | 213.333   | 0         | 52.8328   | 73.4752    | 27.7528    | 112.935    | hypothetical protein, conserved                                     |
| PVX_122010 | 89.4709   | 20.8152   | 0         | 0         | 0         | 0         | 0         | 41.4095   | 0         | 20.9599    | 29.6808    | 0          | hypothetical protein, conserved                                     |
| PVX_122015 | 0         | 0         | 0         | 0         | 0         | 0         | 0         | 0         | 13.2506   | 0          | 6.9625     | 0          | sodium/hydrogen exchanger 1, putative                               |
| PVX_122020 | 0         | 0         | 0         | 0         | 69.0191   | 0         | 0         | 0         | 41.1787   | 0          | 21.6263    | 0          | hypothetical protein, conserved                                     |
| PVX_122025 | 0         | 0         | 0         | 0         | 11.008    | 0         | 53.0623   | 0         | 0         | 24.3987    | 48.3722    | 56.1876    | hypothetical protein, conserved                                     |
| PVX_122030 | 0         | 2.35679   | 0         | 0         | 4.28089   | 0         | 0         | 9.37789   | 1.27943   | 2.37429    | 8.7402     | 5.46206    | hypothetical protein, conserved                                     |
| PVX_122035 | 0         | 0         | 0         | 0         | 0         | 0         | 0         | 0         | 0         | 0          | 0          | 0          | hypothetical protein, conserved                                     |
| PVX_122040 | 0         | 0         | 0         | 0         | 0         | 0         | 0         | 45.6557   | 0         | 0          | 6.54469    | 0          | hypothetical protein, conserved                                     |
| PVX_122045 | 29.5772   | 20.6432   | 147.009   | 94.4788   | 28.1309   | 0         | 45.1984   | 41.0673   | 22.4095   | 10.3934    | 35.3227    | 47.8614    | DNA ligase I, putative                                              |
| PVX_122050 | 0         | 0         | 0         | 0         | 0         | 0         | 0         | 0         | 0         | 0          | 0          | 0          | CoRA-like Mg2+ transporter protein, putative                        |
| PVX_122055 | 0         | 120.118   | 0         | 275.111   | 27.2991   | 0         | 131.64    | 0         | 0         | 30.2077    | 17.1167    | 0          | hypothetical protein, conserved                                     |
| PVX_122060 | 0         | 0         | 0         | 0         | 0         | 0         | 0         | 0         | 0         | 0          | 21.0343    | 0          | hypothetical protein, conserved                                     |
| PVX_122065 | 0         | 241.194   | 286.648   | 0         | 73.1127   | 0         | 0         | 159.901   | 130.848   | 0          | 114.528    | 0          | heat shock protein, putative                                        |
| PVX_122070 | 0         | 0         | 0         | 0         | 0         | 0         | 0         | 0         | 0         | 0          | 0          | 0          | hypothetical protein, conserved                                     |
| PVX_122075 | 0         | 0         | 0         | 0         | 0         | 0         | 0         | 0         | 0         | 150.922    | 0          | 0          | cyclin 4, putative                                                  |
| PVX_122077 | 0         | 0         | 0         | 0         | 0         | 0         | 0         | 0         | 0         | 0          | 5.00115    | 0          | NLI interacting factor-like phosphatase, putative (NIF1)            |
| PVX_122080 | 0         | 39.3033   | 0         | 0         | 0         | 0         | 0         | 0         | 0         | 59.3366    | 33.6157    | 91.1623    | DNA-directed RNA polymerase II 13.3 kDa polypeptide, putative       |
| PVX_122085 | 0         | 15.721    | 0         | 0         | 0         | 0         | 0         | 0         | 8.53343   | 0          | 26.9025    | 36.4453    | hypothetical protein, conserved                                     |
| PVX_122090 | 0         | 0         | 151.249   | 0         | 0         | 0         | 0         | 0         | 0         | 0          | 12.1037    | 0          | hypothetical protein, conserved                                     |
| PVX_122095 | 0         | 0         | 193.87    | 249.19    | 24.7276   | 0         | 0         | 216.44    | 29.5225   | 54.7377    | 124.058    | 0          | transcription factor with AP2 domain(s), putative (ApiAP2)          |
| PVX_122100 | 26.0895   | 18.2041   | 0         | 0         | 11.0227   | 0         | 0         | 60.362    | 26.3522   | 9.16874    | 24.2329    | 14.0643    | hypothetical protein, conserved                                     |
| PVX_122105 | 0         | 0         | 102.726   | 0         | 13.1042   | 0         | 63.1698   | 0         | 0         | 29.0392    | 57.5747    | 0          | hypothetical protein, conserved                                     |
| PVX_122110 | 0         | 0         | 0         | 0         | 10.2555   | 0         | 49.4338   | 0         | 49.0155   | 22.7323    | 51.5059    | 52.3459    | mitogen-activated protein kinase phosphatase 1, putative (MKP1)     |
| PVX_122115 | 0         | 0         | 0         | 0         | 35.9994   | 0         | 0         | 0         | 0         | 39.8028    | 90.23      | 0          | hypothetical protein, conserved                                     |
| PVX_122120 | 0         | 0         | 0         | 0         | 0         | 0         | 0         | 0         | 0         | 0          | 0          | 0          | hypothetical protein, conserved                                     |
| PVX_122125 | 0         | 0         | 0         | 0         | 0         | 0         | 0         | 0         | 0         | 0          | 0          | 0          | hypothetical protein, conserved                                     |
| PVX_122130 | 89.1921   | 62.263    | 110.876   | 285.028   | 28.2873   | 0         | 0         | 61.9297   | 101.377   | 94.0186    | 124.273    | 72.1952    | hypothetical protein, conserved                                     |
| PVX_122135 | 0         | 0         | 0         | 0         | 0         | 0         | 0         | 0         | 0         | 0          | 0          | 0          | hypothetical protein, conserved                                     |
| PVX_122140 | 0         | 0         | 369.603   | 0         | 0         | 0         | 0         | 0         | 0         | 52.0558    | 0          | 0          | hypothetical protein                                                |
| PVX_122145 | 72.8918   | 0         | 0         | 0         | 23.1337   | 0         | 0         | 0         | 27.6219   | 0          | 0          | 0          | hypothetical protein, conserved                                     |
| PVX_122150 | 0         | 0         | 0         | 0         | 0         | 0         | 0         | 0         | 10.9337   | 10.142     | 5.74472    | 0          | hypothetical protein, conserved                                     |
| PVX_122155 | 133.001   | 0         | 165.437   | 0         | 42.2039   | 0         | 0         | 184.736   | 151.193   | 70.0913    | 66.1852    | 215.444    | 26S protease regulatory subunit 108, putative (RPT4)                |
| PVX_122160 | 0         | 0         | 0         | 23.7173   | 0         | 0         | 0         | 0         | 0         | 0          | 1.47873    | 0          | hypothetical protein, conserved                                     |
| PVX_122165 | 76.4406   | 53.3834   | 0         | 0         | 0         | 0         | 0         | 106.185   | 57.9348   | 80.5642    | 76.0793    | 0          | hypothetical protein, conserved                                     |
| PVX_122170 | 0         | 0         | 0         | 0         | 42.6163   | 0         | 0         | 93.2694   | 25.4447   | 47.1832    | 26.7323    | 0          | hypothetical protein, conserved                                     |
| PVX_122175 | 0         | 0         | 0         | 0         | 27.7534   | 0         | 0         | 0         | 33.1293   | 0          | 0          | 0          | hypothetical protein, conserved                                     |
| PVX_122180 | 103.356   | 72.1568   | 0         | 0         | 16.3925   | 0         | 79.027    | 143.538   | 78.3205   | 0          | 82.291     | 83.6763    | U1A small nuclear ribonucleoprotein, putative                       |
| PVX_122185 | 92.9553   | 64.9304   | 0         | 0         | 0         | 0         | 142.337   | 0         | 70.4594   | 0          | 55.5108    | 150.687    | exosome complex component RRP40, putative (RRP40)                   |

| Gene ID    | Patient 1 | Patient 2 | Patient 3 | Patient 4 | Patient 5 | Patient 6 | Patient 7 | Patient 8 | Patient 9 | Patient 10 | Patient 11 | Patient 12 | Gene Description                                                               |
|------------|-----------|-----------|-----------|-----------|-----------|-----------|-----------|-----------|-----------|------------|------------|------------|--------------------------------------------------------------------------------|
| Patient    |           |           |           |           |           |           |           |           |           |            |            |            |                                                                                |
| PVX_122190 | 31.2831   | 65.503    | 0         | 0         | 9.91822   | 0         | 0         | 0         | 0         | 32.9782    | 31.1334    | 0          | U3 small nucleolar RNA-associated protein 6, putative                          |
| PVX_122195 | 0         | 0         | 0         | 0         | 0         | 0         | 0         | 54.4391   | 0         | 13.7756    | 39.0169    | 0          | DnaJ protein, putative                                                         |
| PVX_122200 | 0         | 37.2404   | 0         | 0         | 0         | 0         | 0         | 74.0802   | 0         | 0          | 21.2349    | 0          | DEAD box helicase, putative                                                    |
| PVX_122205 | 0         | 0         | 0         | 0         | 0         | 0         | 0         | 0         | 0         | 0          | 0          | 0          | hypothetical protein, conserved                                                |
| PVX_122207 | 0         | 0         | 0         | 0         | 0         | 0         | 0         | 0         | 0         | 0          | 0          | 1754.68    | conserved Plasmodium protein, unknown function                                 |
| PVX_122210 | 49.615    | 0         | 0         | 0         | 0         | 0         | 75.8675   | 206.709   | 18.7983   | 139.463    | 88.8817    | 0          | DNA-directed RNA polymerase alpha chain, putative                              |
| PVX_122215 | 0         | 0         | 0         | 0         | 8.01905   | 0         | 0         | 0         | 9.58288   | 17.7788    | 15.1052    | 0          | hypothetical protein, conserved                                                |
| PVX_122218 | 84.9279   | 237.268   | 0         | 0         | 134.808   | 0         | 260.023   | 117.985   | 193.113   | 328.187    | 355.015    | 0          | fork head domain protein, putative                                             |
| PVX_122222 | 0         | 23.5737   | 0         | 0         | 0         | 0         | 0         | 0         | 0         | 11.8679    | 20.1676    | 54.6594    | hypothetical protein, conserved                                                |
| PVX_122225 | 0         | 0         | 106.979   | 0         | 0         | 0         | 0         | 0         | 0         | 15.1199    | 8.56509    | 69.6581    | hypothetical protein, conserved                                                |
| PVX_122230 | 0         | 0         | 0         | 0         | 0         | 0         | 0         | 0         | 0         | 0          | 0          | 0          | hypothetical protein, conserved                                                |
| PVX_122235 | 0         | 0         | 253.607   | 0         | 0         | 0         | 0         | 141.504   | 0         | 0          | 60.8177    | 0          | transcription factor, putative                                                 |
| PVX_122240 | 37.9652   | 61.8141   | 94.3052   | 80.81     | 12.0312   | 0         | 19.3284   | 52.705    | 47.9357   | 44.4734    | 42.8202    | 20.4685    | carbamoyl phosphate synthetase, putative                                       |
| PVX_122245 | 1169.29   | 700.749   | 1666.94   | 535.65    | 265.683   | 857.747   | 1025.54   | 696.737   | 760.081   | 703.888    | 831.356    | 271.352    | 40S ribosomal protein S27, putative (RPS27)                                    |
| PVX_122250 | 11.3594   | 15.8515   | 0         | 0         | 1.7996    | 0         | 0         | 0         | 2.15129   | 3.99214    | 9.0437     | 9.18463    | hypothetical protein, conserved                                                |
| PVX_122255 | 0         | 0         | 0         | 0         | 0         | 0         | 0         | 0         | 45.2809   | 20.9934    | 11.8936    | 0          | hypothetical protein, conserved                                                |
| PVX_122260 | 0         | 0         | 0         | 0         | 0         | 0         | 0         | 32.4269   | 8.84749   | 8.2074     | 9.29748    | 0          | hypothetical protein, conserved                                                |
| PVX_122265 | 0         | 0         | 0         | 0         | 0         | 0         | 0         | 0         | 0         | 0          | 0          | 0          | hypothetical protein                                                           |
| PVX_122270 | 0         | 0         | 0         | 0         | 0         | 0         | 0         | 0         | 0         | 0          | 25.6543    | 0          | tyrosine recombinase, putative (INT)                                           |
| PVX_122275 | 0         | 0         | 0         | 0         | 13.9748   | 0         | 0         | 0         | 16.7011   | 23.2396    | 13.163     | 0          | mRNA-decapping enzyme 2, putative (DCP2)                                       |
| PVX_122280 | 96.7101   | 0         | 120.234   | 0         | 30.6745   | 0         | 73.9379   | 67.1522   | 36.6415   | 135.922    | 19.2499    | 0          | hypothetical protein, conserved                                                |
| PVX_122285 | 0         | 1278.27   | 1014.15   | 651.765   | 129.293   | 1043.75   | 0         | 847.21    | 1078.16   | 1425.75    | 1212.71    | 330.173    | 60S ribosomal protein L24, putative                                            |
| PVX_122290 | 41.7072   | 0         | 103.685   | 0         | 52.906    | 0         | 63.7594   | 57.9163   | 15.8013   | 58.6196    | 58.1114    | 0          | protein phosphatase 2C domain containing protein                               |
| PVX_122295 | 33.787    | 47.1653   | 0         | 0         | 0         | 0         | 0         | 93.8287   | 12.7999   | 0          | 53.8006    | 0          | U4/U6 small nuclear ribonucleoprotein PRP3, putative (PRPF3)                   |
| PVX_122300 | 0         | 17.1268   | 0         | 0         | 0         | 0         | 0         | 68.1446   | 0         | 0          | 4.88458    | 0          | HORMA domain protein, putative                                                 |
| PVX_122305 | 0         | 160.258   | 0         | 0         | 0         | 0         | 0         | 0         | 0         | 0          | 0          | 0          | H/ACA ribonucleoprotein complex subunit 1, putative (GAR1)                     |
| PVX_122310 | 149.715   | 0         | 0         | 0         | 0         | 0         | 0         | 0         | 0         | 52.5779    | 29.8044    | 0          | ribosomal RNA large subunit methyltransferase J, putative                      |
| PVX_122315 | 40.6903   | 14.1981   | 50.5482   | 0         | 12.8973   | 104.013   | 93.2439   | 28.2462   | 23.1207   | 35.7479    | 36.4455    | 0          | vacuolar protein sorting-associated protein 18, putative (VPS18)               |
| PVX_122320 | 43.6818   | 0         | 0         | 0         | 0         | 0         | 0         | 60.6596   | 0         | 30.6972    | 26.0841    | 0          | hypothetical protein, conserved                                                |
| PVX_122325 | 0         | 0         | 0         | 0         | 0         | 0         | 0         | 0         | 0         | 0          | 91.1955    | 0          | hypothetical protein, conserved                                                |
| PVX_122330 | 156.217   | 54.5494   | 0         | 0         | 49.585    | 0         | 119.546   | 0         | 59.1996   | 109.762    | 46.6437    | 0          | ATP synthase delta chain, mitochondrial, putative                              |
| PVX_122335 | 30.9371   | 0         | 0         | 197.653   | 0         | 0         | 0         | 0         | 0         | 0          | 30.789     | 50.0639    | hypothetical protein, conserved                                                |
| PVX_122340 | 0         | 0         | 0         | 0         | 0         | 0         | 0         | 0         | 0         | 0          | 26.3246    | 0          | hypothetical protein, conserved                                                |
| PVX_122345 | 0         | 115.07    | 0         | 0         | 0         | 845.065   | 0         | 0         | 62.4071   | 0          | 0          | 0          | zinc finger protein, putative                                                  |
| PVX_122350 | 0         | 22.0114   | 78.3785   | 0         | 0         | 0         | 48.1957   | 87.5776   | 35.8417   | 11.0818    | 50.2172    | 51.035     | hypothetical protein, conserved                                                |
| PVX_122355 | 0         | 79.1745   | 0         | 0         | 35.9994   | 580.942   | 173.629   | 0         | 0         | 39.8028    | 45.115     | 0          | conserved protein, unknown function                                            |
| PVX_122360 | 0         | 0         | 0         | 0         | 137.441   | 0         | 0         | 0         | 0         | 151.503    | 42.9585    | 0          | ras-related protein Rab-5b, putative (RABSb)                                   |
| PVX_122365 | 0         | 117.672   | 0         | 0         | 0         | 0         | 0         | 0         | 0         | 59.0982    | 134.018    | 0          | RNA-binding protein, putative                                                  |
| PVX_122370 | 0         | 33.3837   | 59.4297   | 0         | 7.5816    | 0         | 0         | 33.2071   | 9.06033   | 25.2144    | 9.52112    | 0          | hypothetical protein, conserved                                                |
| PVX_122375 | 253.61    | 0         | 0         | 406.164   | 80.5948   | 0         | 0         | 0         | 96.1394   | 133.612    | 25.2428    | 205.756    | 30S ribosomal protein S15, putative                                            |
| PVX_122380 | 0         | 0         | 0         | 516.286   | 0         | 0         | 0         | 0         | 0         | 0          | 96.1718    | 0          | protein ISD11, putative (ISD11)                                                |
| PVX_122385 | 0         | 0         | 0         | 0         | 0         | 0         | 0         | 0         | 0         | 0          | 10.0997    | 0          | hypothetical protein, conserved                                                |
| PVX_122390 | 0         | 0         | 125.037   | 0         | 0         | 0         | 0         | 0         | 0         | 17.6679    | 0          | 0          | alternative splicing regulator, putative                                       |
| PVX_122395 | 0         | 57.8872   | 0         | 530.302   | 0         | 0         | 0         | 115.141   | 0         | 29.1171    | 32.9967    | 0          | ATP synthase subunit gamma, mitochondrial, putative                            |
| PVX_122405 | 76.2453   | 106.494   | 189.732   | 0         | 24.2      | 0         | 0         | 0         | 144.467   | 133.931    | 121.416    | 0          | AP-1 complex subunit mu, putative                                              |
| PVX_122410 | 55.4566   | 77.4368   | 0         | 177.275   | 70.371    | 0         | 0         | 154.039   | 126.074   | 38.9696    | 176.617    | 179.609    | 26S protease regulatory subunit 7, putative (RPT1)                             |
| PVX_122415 | 0         | 44.6205   | 0         | 0         | 0         | 0         | 0         | 0         | 24.2188   | 22.4644    | 12.7247    | 0          | hypothetical protein, conserved                                                |
| PVX_122420 | 0         | 278.074   | 0         | 0         | 0         | 0         | 0         | 0         | 0         | 0          | 52.8054    | 0          | cytochrome c, putative                                                         |
| PVX_122425 | 810.745   | 383.969   | 431.745   | 462.451   | 312.107   | 0         | 353.976   | 723.661   | 778.804   | 641.014    | 766.519    | 140.562    | M1-family alanyl aminopeptidase, putative                                      |
| PVX_122430 | 0         | 79.3494   | 0         | 0         | 0         | 0         | 57.9211   | 0         | 71.7788   | 13.3149    | 67.8811    | 0          | vacuolar ATP synthase catalytic subunit A, putative                            |
| PVX_122435 | 0         | 0         | 0         | 0         | 0         | 0         | 0         | 0         | 34.0272   | 31.5406    | 35.7447    | 0          | malonyl CoA-acyl carrier protein transacylase precursor, putative              |
| PVX_122440 | 0         | 0         | 0         | 0         | 8.1716    | 0         | 0         | 0         | 0         | 0          | 5.1308     | 0          | hypothetical protein, conserved                                                |
| PVX_122445 | 69.3878   | 0         | 0         | 0         | 0         | 0         | 0         | 96.381    | 52.5869   | 24.3778    | 27.6237    | 0          | hypothetical protein, conserved                                                |
| PVX_122450 | 0         | 70.1068   | 0         | 0         | 31.8716   | 0         | 0         | 0         | 76.0731   | 0          | 59.931     | 0          | hypothetical protein, conserved                                                |
| PVX_122455 | 0         | 0         | 0         | 0         | 7.94713   | 0         | 38.305    | 0         | 28.4909   | 17.6194    | 14.9698    | 0          | small GTP-binding protein, putative                                            |
| PVX_122458 | 0         | 0         | 0         | 0         | 0         | 0         | 0         | 0         | 0         | 0          | 0          | 0          | conserved Plasmodium protein, unknown function                                 |
| PVX_122460 | 0         | 0         | 0         | 0         | 0         | 0         | 125.359   | 113.77    | 31.0362   | 0          | 130.417    | 0          | 2-oxoisovalerate dehydrogenase subunit alpha, mitochondrial, putative (BCKDHA) |
| PVX_122465 | 0         | 0         | 0         | 0         | 0         | 0         | 0         | 34.841    | 9.50647   | 0          | 2.49764    | 0          | hypothetical protein, conserved                                                |
| PVX_122470 | 54.9755   | 115.106   | 68.3079   | 87.7993   | 17.4282   | 140.558   | 0         | 114.496   | 114.544   | 77.2739    | 93.0106    | 133.433    | eukaryotic translation initiation factor 4 gamma, putative (EIF4G)             |
| PVX_122475 | 0         | 0         | 0         | 0         | 0         | 0         | 0         | 0         | 0         | 0          | 55.3796    | 0          | ubiquitin domain containing protein                                            |
| PVX_122480 | 0         | 0         | 0         | 0         | 0         | 0         | 0         | 0         | 0         | 0          | 0          | 0          | hypothetical protein, conserved                                                |
| PVX_122485 | 34.8392   | 24.3174   | 0         | 0         | 11.0466   | 0         | 0         | 96.7519   | 52.7946   | 24.4842    | 34.6726    | 56.3847    | methionyl-tRNA formyltransferase, putative (MTFMT)                             |

| Gene ID    | Patient 1 | Patient 2 | Patient 3 | Patient 4 | Patient 5 | Patient 6 | Patient 7 | Patient 8 | Patient 9 | Patient 10 | Patient 11 | Patient 12 | Gene Description                                                                    |                                                              |
|------------|-----------|-----------|-----------|-----------|-----------|-----------|-----------|-----------|-----------|------------|------------|------------|-------------------------------------------------------------------------------------|--------------------------------------------------------------|
| PVX_122487 | 0         | 0         | 0         | 0         | 0         | 0         | 0         | 0         | 0         | 0          | 40.0601    | 0          | peptidyl-prolyl cis-trans isomerase, putative                                       |                                                              |
| PVX_122490 | 0         | 0         | 0         | 112.576   | 0         | 0         | 0         | 48.9285   | 26.6988   | 0          | 63.1234    | 0          | DEAD box helicase, putative                                                         |                                                              |
| PVX_122495 | 0         | 0         | 0         | 0         | 0         | 0         | 0         | 0         | 7.63399   | 0          | 4.0112     | 0          | hypothetical protein, conserved                                                     |                                                              |
| PVX_122500 | 0         | 0         | 0         | 0         | 0         | 0         | 0         | 0         | 0         | 0          | 5.96663    | 0          | hypothetical protein, conserved                                                     |                                                              |
| PVX_122505 | 0         | 0         | 0         | 0         | 0         | 0         | 0         | 0         | 34.5827   | 32.0549    | 36.3279    | 0          | septum formation protein Maf domain containing protein                              |                                                              |
| PVX_122510 | 25.9332   | 0         | 21.4702   | 0         | 2.73916   | 0         | 13.2011   | 0         | 6.5486    | 12.1518    | 5.16167    | 0          | hypothetical protein, conserved                                                     |                                                              |
| PVX_122515 | 0         | 0         | 0         | 0         | 28.4211   | 0         | 137.054   | 0         | 67.8501   | 31.446     | 53.4561    | 0          | hypothetical protein, conserved                                                     |                                                              |
| PVX_122520 | 0         | 0         | 0         | 0         | 7.44816   | 0         | 0         | 32.6228   | 8.90093   | 8.25696    | 4.67681    | 0          | hypothetical protein, conserved                                                     |                                                              |
| PVX_122525 | 0         | 0         | 110.49    | 142.018   | 0         | 0         | 0         | 61.7144   | 33.6747   | 31.2306    | 26.5375    | 0          | hypothetical protein, conserved                                                     |                                                              |
| PVX_122530 | 12.0566   | 0         | 0         | 0         | 3.82072   | 0         | 0         | 33.475    | 9.13375   | 0          | 19.1978    | 0          | telomerase reverse transcriptase, putative (TERT)                                   |                                                              |
| PVX_122535 | 54.9458   | 76.7232   | 273.295   | 0         | 0         | 0         | 0         | 0         | 62.4564   | 19.3054    | 98.4322    | 88.9761    | hypothetical protein, conserved                                                     |                                                              |
| PVX_122540 | 0         | 0         | 0         | 0         | 0         | 0         | 0         | 0         | 0         | 185.528    | 0          | 0          | hypothetical protein, conserved                                                     |                                                              |
| PVX_122545 | 0         | 0         | 0         | 0         | 31.6581   | 0         | 0         | 0         | 75.5643   | 0          | 39.687     | 0          | cop-coated vesicle membrane protein p24 precursor, putative                         |                                                              |
| PVX_122550 | 60.6835   | 0         | 0         | 194.012   | 38.5058   | 0         | 0         | 252.85    | 114.969   | 63.9622    | 60.3954    | 98.2831    | 0                                                                                   | lipoate-protein ligase 1, putative (LipL1)                   |
| PVX_122555 | 0         | 75.6083   | 0         | 173.085   | 34.3541   | 0         | 165.622   | 75.2013   | 61.5492   | 38.0503    | 118.559    | 0          | hypothetical protein, conserved                                                     |                                                              |
| PVX_122560 | 348.333   | 0         | 0         | 0         | 0         | 0         | 0         | 0         | 132.038   | 40.7834    | 208.023    | 188.347    | 0                                                                                   | ubiquitin-like protein, putative                             |
| PVX_122565 | 0         | 62.3374   | 0         | 0         | 56.6717   | 0         | 0         | 0         | 101.471   | 125.408    | 35.5308    | 0          | TFIIH basal transcription factor subunit, putative                                  |                                                              |
| PVX_122570 | 0         | 0         | 0         | 0         | 64.4996   | 0         | 0         | 0         | 76.8367   | 142.252    | 80.6644    | 0          | hypothetical protein, conserved                                                     |                                                              |
| PVX_122575 | 99.0237   | 0         | 0         | 0         | 0         | 0         | 0         | 0         | 37.5312   | 0          | 39.4234    | 0          | serine/threonine protein kinase, putative                                           |                                                              |
| PVX_122580 | 0         | 0         | 0         | 0         | 0         | 0         | 0         | 0         | 12.6518   | 0          | 13.2945    | 0          | hypothetical protein, conserved                                                     |                                                              |
| PVX_122585 | 0         | 0         | 0         | 0         | 0         | 0         | 0         | 0         | 0         | 0          | 0          | 0          | hypothetical protein, conserved                                                     |                                                              |
| PVX_122590 | 250.505   | 174.959   | 415.662   | 534.27    | 79.5235   | 0         | 0         | 232.003   | 158.224   | 146.672    | 182.837    | 270.652    | 0                                                                                   | zinc finger (CCCH type) protein, putative                    |
| PVX_122600 | 0         | 92.2536   | 0         | 0         | 0         | 0         | 101.065   | 0         | 50.0627   | 0          | 39.4473    | 0          | hypothetical protein, conserved                                                     |                                                              |
| PVX_122605 | 135.724   | 47.3871   | 0         | 217.006   | 21.5347   | 347.431   | 0         | 94.2602   | 51.4299   | 71.5259    | 81.0485    | 109.932    | 0                                                                                   | phosphatidylinositol synthase, putative (PIS)                |
| PVX_122610 | 96.775    | 135.204   | 0         | 0         | 92.1946   | 0         | 444.611   | 0         | 110.035   | 33.9951    | 115.584    | 0          | tRNA (adenine(58)-N(1))-methyltransferase catalytic subunit TRM61, putative (GCD14) |                                                              |
| PVX_122615 | 94.0297   | 0         | 234.104   | 300.905   | 29.8577   | 0         | 0         | 130.641   | 35.6371   | 231.218    | 74.8699    | 152.434    | 0                                                                                   | transcription factor MYB1, putative (MYB1)                   |
| PVX_122620 | 50.7224   | 123.898   | 189.059   | 0         | 80.3952   | 259.352   | 77.5009   | 0         | 105.681   | 71.2964    | 65.623     | 123.103    | 0                                                                                   | exportin-1, putative                                         |
| PVX_122625 | 0         | 0         | 0         | 0         | 0         | 0         | 0         | 0         | 0         | 0          | 0          | 0          | 0                                                                                   | protein kinase, putative                                     |
| PVX_122630 | 23.1563   | 0         | 0         | 0         | 7.34017   | 0         | 35.379    | 0         | 8.77193   | 0          | 23.0452    | 0          | 0                                                                                   | inositol polyphosphate kinase, putative (IPK2)               |
| PVX_122635 | 0         | 0         | 0         | 0         | 0         | 0         | 0         | 0         | 0         | 0          | 0          | 0          | 0                                                                                   | ADP-ribosylation factor, putative                            |
| PVX_122637 | 0         | 0         | 0         | 0         | 0         | 0         | 0         | 0         | 0         | 0          | 0          | 0          | 0                                                                                   | conserved Plasmodium protein, unknown function               |
| PVX_122640 | 0         | 0         | 0         | 0         | 0         | 0         | 0         | 0         | 0         | 0          | 21.5218    | 0          | 0                                                                                   | hypothetical protein, conserved                              |
| PVX_122645 | 85.4283   | 0         | 0         | 0         | 9.02764   | 0         | 0         | 39.538    | 21.5751   | 30.0195    | 39.6756    | 46.0782    | 0                                                                                   | pre-mRNA-processing factor 40, putative (PRP40)              |
| PVX_122650 | 36.324    | 25.3543   | 0         | 0         | 23.0357   | 0         | 0         | 0         | 13.7613   | 38.2912    | 72.3007    | 0          | 0                                                                                   | choline-phosphate cytidylyltransferase, putative             |
| PVX_122655 | 0         | 0         | 0         | 0         | 0         | 0         | 80.2807   | 0         | 0         | 0          | 0          | 0          | 0                                                                                   | hypothetical protein, conserved                              |
| PVX_122660 | 0         | 92.1442   | 328.612   | 0         | 0         | 0         | 0         | 183.253   | 49.9836   | 185.231    | 131.235    | 0          | 0                                                                                   | protein transport protein SEC20, putative                    |
| PVX_122665 | 0         | 0         | 0         | 97.0139   | 19.2571   | 0         | 0         | 0         | 0         | 21.3439    | 30.2248    | 0          | 0                                                                                   | hypothetical protein, conserved                              |
| PVX_122670 | 96.5015   | 134.737   | 0         | 0         | 15.3041   | 0         | 0         | 67.0074   | 36.5624   | 50.8609    | 48.0209    | 0          | 0                                                                                   | U4/U6.U5 tri-snRNP-associated protein 2, putative            |
| PVX_122675 | 33.5841   | 23.441    | 83.4717   | 0         | 0         | 0         | 0         | 0         | 0         | 11.8011    | 33.4235    | 0          | 0                                                                                   | DNA replication licensing factor MCM4, putative              |
| PVX_122680 | 0         | 16.6576   | 0         | 38.1085   | 11.3475   | 0         | 0         | 16.57     | 18.0848   | 12.584     | 35.6358    | 38.6103    | 0                                                                                   | transcription factor with AP2 domain(s), putative (ApiAP2)   |
| PVX_122685 | 55.3537   | 0         | 0         | 176.945   | 35.1201   | 0         | 169.316   | 153.753   | 83.8936   | 97.2432    | 99.1629    | 89.6375    | 0                                                                                   | hypothetical protein, conserved                              |
| PVX_122690 | 0         | 66.5215   | 0         | 0         | 0         | 0         | 0         | 132.31    | 144.37    | 234.169    | 151.652    | 154.385    | 0                                                                                   | hypothetical protein, conserved                              |
| PVX_122695 | 0         | 0         | 0         | 0         | 0         | 0         | 0         | 0         | 0         | 0          | 0          | 0          | 0                                                                                   | hypothetical protein, conserved                              |
| PVX_122700 | 0         | 0         | 0         | 0         | 36.7356   | 0         | 0         | 80.4099   | 0         | 40.6834    | 11.5242    | 0          | 0                                                                                   | hypothetical protein, conserved                              |
| PVX_122705 | 0         | 0         | 0         | 0         | 0         | 1650.24   | 0         | 445.437   | 121.429   | 0          | 0          | 0          | 0                                                                                   | hypothetical protein, conserved                              |
| PVX_122710 | 1567.98   | 767.306   | 782.135   | 0         | 249.328   | 0         | 240.584   | 653.946   | 1724.1    | 1486.71    | 811.58     | 254.638    | 0                                                                                   | 40S ribosomal protein S19, putative (RPS19)                  |
| PVX_122715 | 0         | 0         | 0         | 0         | 22.9796   | 0         | 0         | 50.3158   | 27.4557   | 0          | 14.425     | 0          | 0                                                                                   | hypothetical protein, conserved                              |
| PVX_122720 | 0         | 0         | 0         | 0         | 0         | 0         | 0         | 0         | 0         | 0          | 0          | 0          | 0                                                                                   | hypothetical protein, conserved                              |
| PVX_122725 | 178.139   | 62.2132   | 0         | 0         | 0         | 0         | 136.37    | 0         | 67.5123   | 31.2895    | 53.1901    | 144.373    | 0                                                                                   | ferredoxin, putative                                         |
| PVX_122730 | 0         | 0         | 0         | 0         | 0         | 0         | 0         | 0         | 0         | 0          | 0          | 0          | 0                                                                                   | glycerol-3-phosphate 1-O-acyltransferase, putative (G3PAT)   |
| PVX_122735 | 0         | 14.3647   | 0         | 0         | 0         | 0         | 0         | 0         | 0         | 0          | 0          | 33.3       | 0                                                                                   | hypothetical protein, conserved                              |
| PVX_122740 | 0         | 65.4721   | 58.2764   | 0         | 0         | 0         | 0         | 0         | 0         | 8.24182    | 37.3459    | 0          | 0                                                                                   | structural maintenance of chromosome 2, putative             |
| PVX_122742 | 0         | 0         | 0         | 0         | 0         | 0         | 0         | 0         | 0         | 0          | 0          | 0          | 0                                                                                   | conserved Plasmodium protein, unknown function               |
| PVX_122745 | 0         | 70.052    | 0         | 0         | 0         | 0         | 0         | 0         | 0         | 17.6283    | 69.9054    | 0          | 0                                                                                   | hypothetical protein, conserved                              |
| PVX_122750 | 0         | 0         | 0         | 0         | 0         | 0         | 0         | 0         | 0         | 0          | 7.84116    | 0          | 0                                                                                   | hypothetical protein, conserved                              |
| PVX_122755 | 177.795   | 99.2803   | 0         | 113.606   | 33.8252   | 0         | 0         | 0         | 80.8285   | 74.9699    | 14.1556    | 0          | 0                                                                                   | translocation protein SEC63, putative (SEC63)                |
| PVX_122760 | 0         | 0         | 0         | 0         | 0         | 0         | 0         | 0         | 0         | 0          | 10.2686    | 0          | 0                                                                                   | hypothetical protein, conserved                              |
| PVX_122765 | 42.2985   | 29.5268   | 0         | 0         | 0         | 0         | 0         | 0         | 32.0508   | 14.8627    | 8.41934    | 0          | 0                                                                                   | hypothetical protein                                         |
| PVX_122770 | 88.1814   | 30.7785   | 0         | 0         | 13.9832   | 225.569   | 0         | 0         | 16.7046   | 30.9845    | 17.5522    | 0          | 0                                                                                   | conserved protein, unknown function                          |
| PVX_122775 | 0         | 0         | 0         | 0         | 0         | 0         | 0         | 0         | 0         | 0          | 57.9493    | 67.3245    | 0                                                                                   | hypothetical protein, conserved                              |
| PVX_122780 | 53.8022   | 112.649   | 0         | 0         | 17.056    | 137.556   | 82.2108   | 37.3506   | 61.1447   | 37.8125    | 21.4178    | 0          | 0                                                                                   | N(2),N(2)-dimethylguanosine tRNA methyltransferase, putative |
| PVX_122785 | 29.7938   | 20.7945   | 0         | 0         | 0         | 0         | 0         | 0         | 11.2868   | 20.939     | 53.3721    | 48.2123    | 0                                                                                   | hypothetical protein, conserved                              |

| Gene ID    | Patient 1 | Patient 2 | Patient 3 | Patient 4 | Patient 5 | Patient 6 | Patient 7 | Patient 8 | Patient 9 | Patient 10 | Patient 11 | Patient 12 | Gene Description                                                                                             |
|------------|-----------|-----------|-----------|-----------|-----------|-----------|-----------|-----------|-----------|------------|------------|------------|--------------------------------------------------------------------------------------------------------------|
| Patient    |           |           |           |           |           |           |           |           |           |            |            |            |                                                                                                              |
| PVX_122790 | 0         | 0         | 0         | 0         | 0         | 0         | 0         | 0         | 0         | 0          | 130.188    | 0          | hypothetical protein, conserved                                                                              |
| PVX_122795 | 0         | 0         | 39.5396   | 0         | 0         | 0         | 0         | 22.0965   | 0         | 0          | 19.0078    | 0          | hypothetical protein, conserved                                                                              |
| PVX_122800 | 0         | 0         | 0         | 0         | 0         | 0         | 0         | 52.4841   | 0         | 0          | 22.5697    | 0          | protein phosphatase PP2A regulatory subunit A, putative                                                      |
| PVX_122805 | 0         | 0         | 0         | 0         | 0         | 0         | 0         | 0         | 9.68141   | 0          | 0          | 0          | hypothetical protein, conserved                                                                              |
| PVX_122810 | 23.9752   | 16.7321   | 0         | 0         | 0         | 0         | 0         | 0         | 54.4931   | 16.8501    | 38.1763    | 0          | hypothetical protein, conserved                                                                              |
| PVX_122815 | 0         | 0         | 0         | 310.051   | 0         | 0         | 148.365   | 0         | 36.718    | 34.0318    | 96.4245    | 0          | ATP-dependent Clp protease adaptor protein ClpS, putative                                                    |
| PVX_122820 | 0         | 0         | 0         | 0         | 0         | 0         | 0         | 0         | 0         | 39.6825    | 0          | 91.4504    | TBC domain protein, putative                                                                                 |
| PVX_122825 | 40.2986   | 0         | 0         | 0         | 0         | 0         | 0         | 0         | 0         | 0          | 0          | 0          | hypothetical protein, conserved                                                                              |
| PVX_122830 | 119.682   | 0         | 0         | 0         | 0         | 0         | 183.419   | 0         | 45.3675   | 0          | 0          | 0          | big signal peptidase, putative                                                                               |
| PVX_122835 | 0         | 0         | 0         | 0         | 0         | 0         | 0         | 0         | 0         | 148.288    | 0          | 0          | SNARE protein, putative                                                                                      |
| PVX_122840 | 67.3006   | 93.9895   | 0         | 0         | 0         | 0         | 0         | 0         | 51.0043   | 94.5792    | 147.36     | 0          | ras-related protein Rab-11A, putative (RAB11a)                                                               |
| PVX_122845 | 0         | 0         | 0         | 0         | 0         | 0         | 0         | 26.2969   | 0         | 0          | 3.77009    | 0          | hypothetical protein, conserved                                                                              |
| PVX_122850 | 0         | 0         | 0         | 0         | 41.524    | 0         | 100.102   | 181.762   | 24.7933   | 91.9524    | 117.217    | 0          | dihydrolypolyllysine-residue succinyltransferase component of 2-oxoglutarate dehydrogenase complex, putative |
| PVX_122855 | 177.3     | 0         | 0         | 0         | 0         | 0         | 0         | 0         | 134.47    | 0          | 70.5941    | 288.1      | cyclophilin E, putative,peptidyl-prolyl cis-trans isomerase E, putative                                      |
| PVX_122860 | 0         | 0         | 0         | 0         | 0         | 0         | 0         | 0         | 0         | 0          | 0          | 0          | hypothetical protein, conserved                                                                              |
| PVX_122865 | 0         | 0         | 0         | 0         | 0         | 0         | 0         | 0         | 0         | 0          | 0          | 0          | hypothetical protein, conserved                                                                              |
| PVX_122870 | 128.998   | 0         | 0         | 0         | 0         | 0         | 0         | 0         | 0         | 271.842    | 77.0384    | 0          | hypothetical protein, conserved                                                                              |
| PVX_122875 | 40.3089   | 14.0631   | 0         | 32.1722   | 6.38659   | 0         | 0         | 13.9893   | 11.4512   | 21.2488    | 10.0287    | 16.2979    | hypothetical protein, conserved                                                                              |
| PVX_122880 | 0         | 0         | 0         | 0         | 0         | 0         | 0         | 0         | 0         | 0          | 25.791     | 0          | palmitoyltransferase, putative (DHHC8)                                                                       |
| PVX_122885 | 0         | 0         | 0         | 86.8384   | 0         | 0         | 0         | 0         | 0         | 0          | 5.41137    | 0          | 3',5'-cyclic nucleotide phosphodiesterase, putative                                                          |
| PVX_122890 | 0         | 0         | 0         | 0         | 0         | 0         | 0         | 0         | 0         | 0          | 0          | 0          | 3',5'-cyclic nucleotide phosphodiesterase, putative                                                          |
| PVX_122895 | 0         | 71.7998   | 0         | 328.977   | 0         | 0         | 0         | 0         | 0         | 36.1022    | 143.212    | 166.654    | hypothetical protein, conserved                                                                              |
| PVX_122900 | 0         | 0         | 0         | 0         | 0         | 0         | 0         | 0         | 0         | 0          | 0          | 0          | hypothetical protein, conserved                                                                              |
| PVX_122905 | 36.6963   | 25.6143   | 0         | 351.729   | 11.636    | 0         | 0         | 0         | 41.7072   | 38.6836    | 51.1293    | 0          | hypothetical protein, conserved                                                                              |
| PVX_122910 | 0         | 0         | 0         | 0         | 0         | 0         | 292.626   | 264.937   | 72.2509   | 200.672    | 113.783    | 0          | hypothetical protein, conserved                                                                              |
| PVX_122915 | 161.03    | 0         | 0         | 0         | 0         | 0         | 0         | 0         | 0         | 0          | 32.0573    | 0          | hypothetical protein, conserved                                                                              |
| PVX_122920 | 17.0989   | 35.7924   | 0         | 27.2935   | 13.5453   | 0         | 0         | 23.7365   | 25.9066   | 18.0274    | 39.138     | 0          | hypothetical protein, conserved                                                                              |
| PVX_122925 | 0         | 0         | 0         | 0         | 0         | 0         | 0         | 0         | 0         | 0          | 0          | 0          | hypothetical protein                                                                                         |
| PVX_122930 | 0         | 0         | 0         | 358.725   | 35.5926   | 0         | 0         | 0         | 84.9372   | 118.064    | 156.123    | 0          | histone H2B variant, putative (H2B.Z)                                                                        |
| PVX_122935 | 0         | 0         | 112.22    | 0         | 0         | 0         | 0         | 0         | 0         | 0          | 0          | 0          | hypothetical protein, conserved                                                                              |
| PVX_122940 | 0         | 14.6546   | 0         | 0         | 0         | 0         | 32.0811   | 0         | 0         | 0          | 4.17968    | 0          | hypothetical protein, conserved                                                                              |
| PVX_122945 | 31.5256   | 22.0036   | 78.3509   | 0         | 9.99515   | 0         | 0         | 0         | 23.886    | 0          | 25.0998    | 102.034    | palmitoyltransferase, putative (DHHC4)                                                                       |
| PVX_122947 | 0         | 0         | 0         | 539.698   | 0         | 0         | 0         | 0         | 63.8171   | 0          | 0          | 0          | calmodulin, putative                                                                                         |
| PVX_122950 | 42.9069   | 29.9517   | 0         | 0         | 0         | 0         | 59.5831   | 65.0238   | 15.0764   | 59.7831    | 69.4574    | 0          | transcription elongation factor, putative                                                                    |
| PVX_122955 | 0         | 0         | 0         | 0         | 0         | 0         | 0         | 44.1026   | 40.895    | 11.5842    | 0          | 0          | hypothetical protein, conserved                                                                              |
| PVX_122956 | 0         | 0         | 0         | 0         | 0         | 0         | 0         | 0         | 0         | 0          | 0          | 0          | tRNA Asparagine                                                                                              |
| PVX_122957 | 0         | 0         | 0         | 0         | 0         | 0         | 0         | 0         | 0         | 0          | 0          | 0          | tRNA Leucine                                                                                                 |
| PVX_122958 | 0         | 0         | 0         | 0         | 0         | 0         | 0         | 0         | 0         | 0          | 0          | 0          | tRNA Serine                                                                                                  |
| PVX_122960 | 0         | 0         | 0         | 43.3991   | 0         | 104.625   | 189.962   | 103.646   | 72.0722   | 136.113    | 0          | 0          | phosphoglycolate phosphatase precursor, putative                                                             |
| PVX_122962 | 0         | 0         | 0         | 0         | 0         | 1436.13   | 0         | 0         | 0         | 0          | 0          | 0          | conserved Plasmodium protein, unknown function                                                               |
| PVX_122965 | 0         | 0         | 0         | 6.40929   | 0         | 0         | 0         | 0         | 0         | 0          | 8.04959    | 0          | hypothetical protein, conserved                                                                              |
| PVX_122970 | 0         | 0         | 0         | 0         | 0         | 0         | 0         | 0         | 0         | 0          | 0          | 0          | calcium-dependent protein kinase 3, putative                                                                 |
| PVX_122975 | 0         | 0         | 0         | 0         | 0         | 0         | 0         | 0         | 0         | 0          | 0          | 0          | hypothetical protein, conserved                                                                              |
| PVX_122980 | 0         | 0         | 0         | 0         | 0         | 0         | 0         | 0         | 0         | 100.101    | 113.584    | 0          | ATP synthase epsilon chain, mitochondrial , putative                                                         |
| PVX_122985 | 34.9344   | 24.3839   | 0         | 11.0768   | 0         | 0         | 48.5082   | 66.1736   | 61.3777   | 20.8604    | 0          | 0          | GTP-binding protein TypA, putative                                                                           |
| PVX_122990 | 0         | 0         | 0         | 0         | 0         | 0         | 0         | 0         | 0         | 0          | 109.238    | 900.579    | hypothetical protein, conserved                                                                              |
| PVX_122995 | 76.2374   | 0         | 94.7544   | 243.585   | 12.0874   | 0         | 58.2669   | 105.863   | 72.2069   | 13.3943    | 113.81     | 61.698     | transporter, putative                                                                                        |
| PVX_123000 | 227.176   | 0         | 141.251   | 0         | 18.0176   | 0         | 86.8648   | 78.8781   | 21.5193   | 39.9091    | 56.524     | 0          | cation diffusion facilitator transporter domain containing protein                                           |
| PVX_123005 | 0         | 23.681    | 0         | 0         | 10.7574   | 0         | 103.708   | 0         | 25.7066   | 0          | 47.2718    | 0          | FAD-dependent monooxygenase, putative                                                                        |
| PVX_123010 | 147.087   | 51.3339   | 91.4026   | 0         | 23.3199   | 0         | 0         | 102.121   | 83.5857   | 116.289    | 117.107    | 0          | importin-beta 2, putative                                                                                    |
| PVX_123015 | 0         | 0         | 0         | 0         | 0         | 0         | 0         | 0         | 0         | 0          | 0          | 0          | hypothetical protein                                                                                         |
| PVX_123020 | 0         | 0         | 0         | 108.761   | 0         | 0         | 0         | 0         | 0         | 11.9627    | 6.77624    | 0          | hypothetical protein, conserved                                                                              |
| PVX_123025 | 215.97    | 301.774   | 0         | 0         | 34.3008   | 0         | 165.43    | 300.1     | 81.8603   | 113.792    | 64.4875    | 175.126    | selenoprotein, putative (Sel3)                                                                               |
| PVX_123030 | 302.425   | 211.269   | 251.029   | 0         | 32.0155   | 0         | 154.4     | 0         | 76.4161   | 141.645    | 301.005    | 0          | superoxide dismutase [Fe], putative                                                                          |
| PVX_123035 | 0         | 0         | 0         | 0         | 0         | 0         | 0         | 0         | 0         | 0          | 0          | 0          | hypothetical protein, conserved                                                                              |
| PVX_123040 | 0         | 0         | 0         | 0         | 0         | 0         | 0         | 0         | 0         | 0          | 0          | 0          | hypothetical protein, conserved                                                                              |
| PVX_123045 | 0         | 0         | 0         | 0         | 0         | 0         | 0         | 0         | 0         | 0          | 0          | 0          | hypothetical protein, conserved                                                                              |
| PVX_123050 | 0         | 0         | 0         | 0         | 16.421    | 0         | 0         | 0         | 19.6141   | 0          | 10.3042    | 0          | phospholipase DDHD1, putative                                                                                |
| PVX_123055 | 27.752    | 77.4754   | 0         | 0         | 0         | 0         | 38.5323   | 63.0791   | 19.5042   | 5.52381    | 0          | 0          | AAA family ATPase, putative                                                                                  |
| PVX_123060 | 2524.94   | 1137.7    | 608.137   | 1302.78   | 749.799   | 834.332   | 1496.08   | 3168.16   | 1944.6    | 2174.65    | 1896.93    | 395.98     | DNA/RNA-binding protein Alba 1, putative (ALBA1)                                                             |
| PVX_123065 | 100.808   | 0         | 0         | 0         | 0         | 0         | 0         | 0         | 38.208    | 35.4112    | 20.067     | 0          | hypothetical protein, conserved                                                                              |
| PVX_123070 | 990.038   | 790.841   | 1057.79   | 1359.63   | 314.738   | 725.698   | 433.809   | 786.375   | 1018.79   | 1043.11    | 1126.22    | 459.177    | 60S ribosomal protein L13, putative                                                                          |

| Gene ID    | Patient 1 | Patient 2 | Patient 3 | Patient 4 | Patient 5 | Patient 6 | Patient 7 | Patient 8 | Patient 9 | Patient 10 | Patient 11 | Patient 12 | Gene Description                                                          |
|------------|-----------|-----------|-----------|-----------|-----------|-----------|-----------|-----------|-----------|------------|------------|------------|---------------------------------------------------------------------------|
| Patient    |           |           |           |           |           |           |           |           |           |            |            |            |                                                                           |
| PVX_123075 | 638.807   | 557.674   | 397.448   | 255.429   | 152.08    | 408.958   | 488.878   | 443.703   | 695.99    | 476.89     | 524.527    | 258.793    | 40S ribosomal protein S16, putative                                       |
| PVX_123080 | 0         | 71.7998   | 0         | 0         | 0         | 0         | 0         | 0         | 0         | 0          | 20.4589    | 0          | GDP-mannose 4,6-dehydratase, putative (GMD)                               |
| PVX_123085 | 24.5878   | 0         | 61.0963   | 0         | 0         | 0         | 0         | 0         | 9.31428   | 8.6403     | 9.78794    | 0          | ABC transporter, putative                                                 |
| PVX_123090 | 0         | 86.3228   | 0         | 0         | 19.613    | 0         | 94.5599   | 257.569   | 46.8454   | 130.309    | 61.5218    | 0          | translation initiation factor SUI1, putative                              |
| PVX_123095 | 0         | 0         | 0         | 0         | 0         | 0         | 0         | 0         | 0         | 0          | 0          | 0          | hypothetical protein                                                      |
| PVX_123100 | 99.7276   | 243.678   | 0         | 0         | 47.4491   | 0         | 0         | 69.2486   | 18.8926   | 105.121    | 99.2528    | 80.735     | hypothetical protein, conserved                                           |
| PVX_123105 | 134.189   | 187.35    | 222.417   | 0         | 70.9306   | 228.843   | 0         | 186.347   | 186.415   | 157.168    | 222.582    | 144.824    | hypothetical protein, conserved                                           |
| PVX_123110 | 153.143   | 213.899   | 0         | 489.833   | 121.519   | 1960.62   | 0         | 106.367   | 377.221   | 538.014    | 137.177    | 0          | Mitotic apparatus protein p62, putative                                   |
| PVX_123115 | 0         | 48.6044   | 0         | 0         | 22.0884   | 0         | 0         | 0         | 79.1258   | 24.4537    | 83.1289    | 0          | nuclear movement protein, putative                                        |
| PVX_123120 | 0         | 0         | 0         | 0         | 0         | 0         | 0         | 0         | 0         | 0          | 0          | 0          | hypothetical protein, conserved                                           |
| PVX_123125 | 0         | 0         | 0         | 0         | 0         | 0         | 0         | 0         | 18.2812   | 0          | 0          | 0          | hypothetical protein, conserved                                           |
| PVX_123130 | 291.625   | 0         | 0         | 0         | 0         | 0         | 0         | 0         | 0         | 51.2082    | 0          | 0          | hypothetical protein, conserved                                           |
| PVX_123135 | 0         | 0         | 0         | 0         | 0         | 0         | 0         | 101.334   | 55.2888   | 25.6293    | 43.5636    | 0          | hypothetical protein, conserved                                           |
| PVX_123140 | 0         | 0         | 0         | 0         | 0         | 0         | 0         | 0         | 0         | 42.8387    | 24.2793    | 0          | ubiquitin-conjugating enzyme E2, putative                                 |
| PVX_123145 | 0         | 102.789   | 0         | 0         | 15.5627   | 0         | 37.5059   | 68.1633   | 83.6906   | 51.7565    | 87.9465    | 39.7165    | hypothetical protein, conserved                                           |
| PVX_123150 | 62.3753   | 43.5528   | 0         | 0         | 39.582    | 0         | 0         | 0         | 165.445   | 109.575    | 198.654    | 0          | karyopherin alpha, putative                                               |
| PVX_123155 | 0         | 0         | 0         | 0         | 0         | 0         | 0         | 0         | 29.6516   | 0          | 0          | 0          | sporozoite surface protein 3, putative (SSP3)                             |
| PVX_123158 | 0         | 0         | 0         | 0         | 0         | 0         | 0         | 0         | 0         | 0          | 12.9767    | 0          | trypsin-like serine protease, putative                                    |
| PVX_123162 | 134.222   | 0         | 0         | 0         | 42.6622   | 0         | 0         | 0         | 50.884    | 141.421    | 133.598    | 0          | GTPase, putative                                                          |
| PVX_123165 | 12.6873   | 35.4125   | 63.0906   | 0         | 20.1033   | 0         | 19.3777   | 17.6132   | 48.058    | 22.2934    | 35.3537    | 0          | hypothetical protein, conserved                                           |
| PVX_123170 | 0         | 0         | 0         | 399.697   | 59.4975   | 0         | 95.6187   | 0         | 23.6846   | 21.9608    | 12.4419    | 0          | hypothetical protein, conserved                                           |
| PVX_123175 | 0         | 17.3312   | 0         | 0         | 7.8721    | 0         | 0         | 34.479    | 9.40734   | 0          | 9.88572    | 0          | hypothetical protein, conserved                                           |
| PVX_123180 | 0         | 0         | 0         | 0         | 21.0237   | 0         | 0         | 0         | 0         | 0          | 13.188     | 0          | hypothetical protein, conserved                                           |
| PVX_123185 | 0         | 0         | 0         | 0         | 0         | 0         | 0         | 36.1338   | 29.5764   | 9.14527    | 41.4403    | 0          | hypothetical protein, conserved                                           |
| PVX_123190 | 0         | 15.3386   | 0         | 0         | 0         | 0         | 0         | 0         | 0         | 0          | 4.37472    | 0          | hypothetical protein, conserved                                           |
| PVX_123195 | 0         | 27.3896   | 0         | 0         | 0         | 0         | 0         | 0         | 14.8657   | 13.7876    | 7.81022    | 0          | hypothetical protein, conserved                                           |
| PVX_123200 | 0         | 54.0443   | 192.463   | 0         | 0         | 0         | 59.1754   | 0         | 146.663   | 81.6168    | 92.4658    | 0          | conserved protein, unknown function                                       |
| PVX_123205 | 0         | 10.6356   | 37.8621   | 0         | 4.83032   | 0         | 0         | 5.77332   | 5.35616   | 3.03361    | 0          | 0          | CCR4-associated factor 1, putative (CAF1)                                 |
| PVX_123210 | 0         | 19.8997   | 70.8561   | 0         | 0         | 0         | 0         | 0         | 21.6026   | 10.0192    | 28.3758    | 0          | hypothetical protein, conserved                                           |
| PVX_123215 | 0         | 0         | 0         | 132.837   | 0         | 0         | 0         | 0         | 15.7499   | 43.8218    | 16.5493    | 0          | mitochondrial carrier protein, putative                                   |
| PVX_123220 | 0         | 0         | 84.1992   | 0         | 0         | 0         | 0         | 0         | 0         | 23.8077    | 13.4858    | 0          | cullin-1, putative (CUL1)                                                 |
| PVX_123225 | 0         | 0         | 0         | 0         | 0         | 0         | 0         | 0         | 0         | 0          | 0          | 0          | hypothetical protein, conserved                                           |
| PVX_123230 | 117.612   | 0         | 0         | 250.528   | 111.888   | 0         | 0         | 0         | 163.38    | 137.756    | 101.444    | 63.4567    | hydroxymethylpterin pyrophosphokinase-dihydropterate synthetase, putative |
| PVX_123235 | 0         | 0         | 0         | 0         | 0         | 0         | 0         | 0         | 0         | 0          | 155.81     | 639.553    | hypothetical protein, conserved                                           |
| PVX_123240 | 104.518   | 437.713   | 173.189   | 333.911   | 154.653   | 534.567   | 53.2484   | 241.88    | 303.569   | 330.537    | 305.119    | 56.3847    | DEAD/DEAH box helicase, putative                                          |
| PVX_123245 | 0         | 88.2376   | 0         | 0         | 40.1263   | 0         | 0         | 0         | 47.866    | 44.3488    | 0          | 0          | Protein phosphatase 2C containing protein                                 |
| PVX_123250 | 48.565    | 67.8077   | 0         | 155.214   | 46.2117   | 0         | 0         | 0         | 18.4003   | 119.448    | 29.0002    | 0          | aquaporin, putative (AQP2)                                                |
| PVX_123260 | 91.1916   | 95.4894   | 113.365   | 0         | 14.4611   | 0         | 0         | 0         | 34.55     | 80.1048    | 36.3027    | 73.8157    | hypothetical protein, conserved                                           |
| PVX_123265 | 93.8494   | 0         | 0         | 0         | 0         | 0         | 95.6158   | 0         | 0         | 32.9782    | 31.1334    | 0          | hypothetical protein, conserved                                           |
| PVX_123270 | 0         | 0         | 0         | 500.895   | 49.6908   | 0         | 0         | 0         | 0         | 109.742    | 31.1056    | 0          | 50S ribosomal protein L33, putative                                       |
| PVX_123275 | 119.363   | 83.405    | 0         | 0         | 75.8512   | 0         | 0         | 0         | 90.4927   | 167.7      | 71.2834    | 0          | acyl-CoA binding protein, putative                                        |
| PVX_123283 | 0         | 33.0742   | 0         | 0         | 7.5113    | 0         | 0         | 0         | 8.97636   | 16.6538    | 0          | 0          | JmjC domain containing protein (JmjC1)                                    |
| PVX_123290 | 0         | 0         | 0         | 0         | 8.78158   | 0         | 0         | 0         | 10.4937   | 0          | 5.51355    | 0          | hypothetical protein, conserved                                           |
| PVX_123295 | 54.0499   | 0         | 0         | 0         | 34.2918   | 0         | 0         | 75.065    | 0         | 18.9907    | 32.2757    | 0          | RuvB-like helicase 1, putative (RUVB1)                                    |
| PVX_123300 | 0         | 0         | 0         | 0         | 0         | 0         | 0         | 0         | 0         | 1.91349    | 3.25108    | 0          | hypothetical protein, conserved                                           |
| PVX_123305 | 0         | 0         | 0         | 0         | 80.8745   | 0         | 0         | 0         | 0         | 89.0482    | 202.045    | 0          | histone acetyltransferase subunit NuA4, putative                          |
| PVX_123307 | 0         | 0         | 0         | 0         | 11.6169   | 0         | 0         | 50.8721   | 55.5185   | 77.2406    | 51.0456    | 0          | conserved Plasmodium protein, unknown function                            |
| PVX_123310 | 0         | 33.4373   | 0         | 76.5106   | 15.1876   | 0         | 36.6016   | 66.5208   | 27.2247   | 16.8366    | 9.53641    | 38.759     | hypothetical protein, conserved                                           |
| PVX_123315 | 43.9176   | 0         | 0         | 0         | 13.9283   | 0         | 0         | 0         | 0         | 0          | 34.9665    | 0          | hypothetical protein, conserved                                           |
| PVX_123320 | 19.862    | 0         | 0         | 0         | 6.29543   | 0         | 0         | 0         | 0         | 13.9596    | 27.6733    | 0          | hypothetical protein, conserved                                           |
| PVX_123325 | 0         | 0         | 0         | 0         | 31.1365   | 0         | 0         | 0         | 37.1608   | 68.8835    | 39.0347    | 0          | hypothetical protein, conserved                                           |
| PVX_123330 | 0         | 0         | 0         | 0         | 0         | 0         | 0         | 0         | 43.7892   | 40.6046    | 34.5057    | 0          | glycerol-3-phosphate 1-O-acyltransferase, putative                        |
| PVX_123335 | 0         | 0         | 0         | 488.892   | 0         | 0         | 0         | 0         | 115.658   | 107.126    | 30.3633    | 0          | conserved protein, unknown function                                       |
| PVX_123340 | 65.819    | 137.791   | 204.389   | 157.627   | 46.9353   | 0         | 50.2696   | 91.3765   | 155.825   | 156.129    | 114.63     | 0          | eukaryotic translation initiation factor 3 subunit 10, putative           |
| PVX_123345 | 0         | 0         | 0         | 0         | 0         | 0         | 0         | 0         | 41.3798   | 0          | 65.1956    | 0          | iron-sulfur subunit of succinate dehydrogenase, putative                  |
| PVX_123350 | 0         | 40.8141   | 0         | 0         | 0         | 0         | 0         | 40.5975   | 0         | 20.5491    | 0          | 0          | bromodomain protein, putative                                             |
| PVX_123355 | 137.946   | 96.4128   | 343.867   | 441.988   | 0         | 0         | 211.532   | 0         | 52.2971   | 242.238    | 54.922     | 0          | hypothetical protein, conserved                                           |
| PVX_123357 | 0         | 0         | 0         | 0         | 0         | 0         | 901.703   | 0         | 0         | 0          | 115.482    | 0          | conserved Plasmodium protein, unknown function                            |
| PVX_123360 | 0         | 0         | 0         | 0         | 0         | 0         | 0         | 0         | 0         | 0          | 0          | 0          | hypothetical protein, conserved                                           |
| PVX_123365 | 0         | 0         | 0         | 0         | 0         | 0         | 0         | 0         | 0         | 0          | 0          | 0          | integral membrane protein GPR180, putative                                |
| PVX_123370 | 0         | 0         | 0         | 0         | 0         | 0         | 0         | 0         | 0         | 0          | 0          | 0          | dynein light chain 1, putative                                            |
| PVX_123375 | 0         | 172.191   | 0         | 0         | 0         | 0         | 0         | 0         | 186.681   | 0          | 97.9667    | 0          | RNA polymerase subunit 8c, putative                                       |

| Gene ID    | Patient 1 | Patient 2 | Patient 3 | Patient 4 | Patient 5 | Patient 6 | Patient 7 | Patient 8 | Patient 9 | Patient 10 | Patient 11 | Patient 12 | Gene Description                                                 |
|------------|-----------|-----------|-----------|-----------|-----------|-----------|-----------|-----------|-----------|------------|------------|------------|------------------------------------------------------------------|
| Patient    |           |           |           |           |           |           |           |           |           |            |            |            |                                                                  |
| PVX_123380 | 0         | 88.1075   | 0         | 0         | 10.0057   | 0         | 48.2298   | 43.8197   | 35.867    | 22.1793    | 25.1263    | 0          | bifunctional aminoacyl-tRNA synthetase, putative                 |
| PVX_123385 | 0         | 20.857    | 74.2661   | 0         | 18.9482   | 0         | 45.6667   | 0         | 45.2831   | 42.0037    | 11.8961    | 0          | hypothetical protein, conserved                                  |
| PVX_123390 | 0         | 0         | 0         | 0         | 36.3222   | 0         | 0         | 0         | 86.6747   | 40.1586    | 45.5185    | 0          | hypothetical protein, conserved                                  |
| PVX_123395 | 0         | 17.2737   | 0         | 0         | 15.6919   | 0         | 0         | 34.3645   | 9.37612   | 8.69764    | 19.7058    | 40.0462    | GPI ethanolamine phosphate transferase 3, putative (PIGO)        |
| PVX_123400 | 0         | 62.8393   | 0         | 0         | 28.5642   | 0         | 0         | 124.989   | 34.0957   | 0          | 17.9083    | 0          | SET domain containing protein                                    |
| PVX_123405 | 59.2767   | 124.163   | 0         | 0         | 94.032    | 0         | 90.6693   | 82.3283   | 134.763   | 124.96     | 129.789    | 96.0009    | geranylgeranyl transferase type2 beta subunit, putative          |
| PVX_123407 | 511.38    | 0         | 0         | 1655.89   | 0         | 0         | 0         | 0         | 0         | 358.53     | 101.851    | 0          | conserved Plasmodium protein, unknown function                   |
| PVX_123410 | 0         | 0         | 0         | 0         | 0         | 0         | 0         | 0         | 0         | 0          | 57.1237    | 0          | hypothetical protein, conserved                                  |
| PVX_123415 | 0         | 0         | 0         | 0         | 0         | 0         | 0         | 0         | 0         | 0          | 0          | 0          | adrenodoxin-type ferredoxin, putative                            |
| PVX_123420 | 0         | 0         | 0         | 0         | 0         | 0         | 0         | 0         | 74.9793   | 69.4923    | 19.6899    | 0          | hypothetical protein, conserved                                  |
| PVX_123425 | 0         | 0         | 0         | 0         | 0         | 0         | 0         | 0         | 0         | 0          | 0          | 0          | hypothetical protein, conserved                                  |
| PVX_123430 | 0         | 0         | 0         | 536.276   | 26.6073   | 0         | 0         | 116.436   | 31.7633   | 29.4442    | 50.0514    | 135.834    | hypothetical protein, conserved                                  |
| PVX_123435 | 133.421   | 0         | 332.546   | 0         | 0         | 0         | 0         | 0         | 50.5802   | 46.8596    | 185.921    | 0          | thioredoxin peroxidase 2, putative                               |
| PVX_123440 | 0         | 0         | 0         | 0         | 0         | 0         | 0         | 0         | 0         | 12.1994    | 6.91031    | 0          | hypothetical protein, conserved                                  |
| PVX_123445 | 0         | 0         | 0         | 0         | 0         | 0         | 0         | 0         | 0         | 0          | 0          | 0          | cyclophilin, putative                                            |
| PVX_123450 | 666.919   | 116.573   | 0         | 534.647   | 53.0372   | 0         | 0         | 0         | 379.332   | 585.481    | 265.538    | 270.844    | 10 kDa chaperonin, putative                                      |
| PVX_123455 | 0         | 38.6226   | 0         | 0         | 17.5492   | 0         | 0         | 0         | 41.9208   | 38.8732    | 55.0564    | 89.582     | hypothetical protein, conserved                                  |
| PVX_123457 | 0         | 0         | 0         | 0         | 0         | 0         | 0         | 0         | 0         | 0          | 0          | 0          | conserved Plasmodium protein, unknown function                   |
| PVX_123460 | 24.608    | 0         | 0         | 0         | 0         | 0         | 0         | 0         | 0         | 8.64742    | 4.89801    | 0          | hypothetical protein                                             |
| PVX_123465 | 0         | 0         | 0         | 0         | 0         | 0         | 0         | 0         | 0         | 0          | 111.247    | 0          | hypothetical protein, conserved                                  |
| PVX_123470 | 0         | 0         | 0         | 0         | 0         | 0         | 0         | 0         | 0         | 0          | 0          | 0          | hypothetical protein, conserved                                  |
| PVX_123475 | 0         | 29.1138   | 103.685   | 0         | 26.453    | 0         | 0         | 115.833   | 63.2051   | 87.9295    | 41.5081    | 0          | hypothetical protein, conserved                                  |
| PVX_123480 | 0         | 0         | 0         | 0         | 0         | 0         | 0         | 0         | 56.2389   | 52.154     | 29.5453    | 0          | serine--tRNA ligase, putative                                    |
| PVX_123485 | 0         | 0         | 0         | 0         | 0         | 0         | 0         | 0         | 0         | 43.9767    | 0          | 0          | hypothetical protein, conserved                                  |
| PVX_123490 | 0         | 69.4054   | 0         | 317.99    | 0         | 0         | 0         | 0         | 301.25    | 69.8008    | 0          | 0          | glycerol-3-phosphate dehydrogenase, putative                     |
| PVX_123495 | 0         | 0         | 0         | 376.206   | 0         | 0         | 180.035   | 163.263   | 89.066    | 123.795    | 23.3868    | 0          | signal recognition particle subunit SRP19, putative (SRP19)      |
| PVX_123500 | 0         | 30.3006   | 0         | 0         | 13.766    | 0         | 0         | 60.277    | 16.4452   | 30.5037    | 17.2797    | 0          | hypothetical protein, conserved                                  |
| PVX_123505 | 159.987   | 111.734   | 995.401   | 255.887   | 126.96    | 0         | 489.754   | 888.994   | 454.718   | 533.947    | 589.157    | 777.769    | male development gene 1, putative (MDV1)                         |
| PVX_123510 | 0         | 0         | 0         | 0         | 0         | 0         | 0         | 0         | 0         | 0          | 0          | 0          | cell traversal protein for ookinetes and sporozoites (CeITOS)    |
| PVX_123515 | 28.7598   | 0         | 0         | 91.8656   | 9.11764   | 0         | 0         | 0         | 0         | 10.1062    | 11.4488    | 0          | perforin-like protein 2 (PLP2)                                   |
| PVX_123517 | 0         | 0         | 0         | 0         | 0         | 0         | 0         | 0         | 0         | 0          | 0          | 0          | tRNA Proline                                                     |
| PVX_123520 | 0         | 0         | 73.2381   | 0         | 9.34298   | 0         | 0         | 0         | 11.1642   | 31.0672    | 17.5974    | 47.6879    | DNA-binding chaperone, putative                                  |
| PVX_123525 | 0         | 0         | 0         | 0         | 132.127   | 0         | 0         | 0         | 0         | 0          | 0          | 0          | hypothetical protein, conserved                                  |
| PVX_123530 | 0         | 0         | 0         | 0         | 0         | 0         | 0         | 0         | 0         | 0          | 0          | 0          | meiotic recombination protein SPO11, putative (SPO11)            |
| PVX_123535 | 28.1359   | 58.9106   | 0         | 0         | 0         | 0         | 42.9939   | 0         | 21.3173   | 19.7739    | 11.2004    | 45.5273    | RNA-binding protein, putative                                    |
| PVX_123540 | 72.7365   | 0         | 90.3987   | 0         | 0         | 0         | 55.5881   | 50.4999   | 27.5561   | 76.6757    | 57.9111    | 0          | GTP-binding protein, putative                                    |
| PVX_123545 | 0         | 19.4533   | 0         | 0         | 0         | 0         | 42.5918   | 0         | 0         | 0          | 11.0958    | 0          | hypothetical protein, conserved                                  |
| PVX_123550 | 51.6778   | 72.1568   | 128.508   | 0         | 32.785    | 0         | 0         | 71.769    | 39.1603   | 72.6298    | 51.4319    | 0          | hypothetical protein, conserved                                  |
| PVX_123555 | 0         | 0         | 0         | 0         | 0         | 0         | 0         | 0         | 0         | 0          | 0          | 0          | hypothetical protein, conserved                                  |
| PVX_123560 | 0         | 0         | 0         | 0         | 0         | 0         | 0         | 0         | 25.9711   | 0          | 13.6426    | 0          | hypothetical protein, conserved                                  |
| PVX_123565 | 0         | 0         | 0         | 0         | 0         | 0         | 0         | 0         | 0         | 0          | 31.8851    | 0          | zinc finger protein, putative                                    |
| PVX_123570 | 0         | 58.6485   | 0         | 0         | 0         | 0         | 0         | 116.655   | 0         | 0          | 16.7151    | 0          | hypothetical protein, conserved                                  |
| PVX_123575 | 0         | 0         | 0         | 0         | 0         | 0         | 0         | 0         | 0         | 0          | 0          | 0          | thrombospondin-related apical membrane protein, putative (TRAMP) |
| PVX_123580 | 0         | 0         | 0         | 0         | 0         | 0         | 0         | 95.8604   | 0         | 0          | 0          | 0          | hypothetical protein, conserved                                  |
| PVX_123585 | 0         | 39.4949   | 0         | 45.179    | 0         | 0         | 21.6122   | 0         | 16.0793   | 9.94512    | 5.63267    | 0          | hypothetical protein, conserved                                  |
| PVX_123590 | 0         | 0         | 0         | 0         | 0         | 0         | 83.827    | 76.123    | 0         | 19.2581    | 10.9101    | 0          | AP-3 complex subunit mu, putative                                |
| PVX_123592 | 144.372   | 0         | 0         | 0         | 22.9094   | 0         | 0         | 100.271   | 54.7088   | 50.7213    | 43.1068    | 0          | triose or hexose phosphate/phosphate translocator, putative      |
| PVX_123595 | 23.6708   | 16.5196   | 0         | 75.5993   | 0         | 0         | 0         | 0         | 0         | 0          | 14.1343    | 0          | hypothetical protein, conserved                                  |
| PVX_123597 | 0         | 0         | 96.4822   | 0         | 0         | 0         | 0         | 0         | 44.1135   | 27.2764    | 15.4511    | 0          | arginyl-tRNA synthetase, putative                                |
| PVX_123600 | 0         | 0         | 0         | 0         | 0         | 0         | 0         | 0         | 0         | 0          | 0          | 0          | hypothetical protein, conserved                                  |
| PVX_123605 | 0         | 0         | 0         | 0         | 0         | 0         | 0         | 0         | 0         | 0          | 0          | 0          | hypothetical protein, conserved                                  |
| PVX_123610 | 0         | 0         | 0         | 0         | 12.7449   | 0         | 0         | 0         | 15.2263   | 0          | 7.99963    | 0          | hypothetical protein, conserved                                  |
| PVX_123615 | 0         | 0         | 0         | 0         | 0         | 0         | 0         | 0         | 0         | 7.20049    | 0          | 0          | formin 2, putative                                               |
| PVX_123620 | 47.9022   | 22.2848   | 39.6666   | 0         | 0         | 0         | 0         | 44.3349   | 36.2903   | 72.9468    | 28.6032    | 0          | clathrin heavy chain, putative                                   |
| PVX_123625 | 0         | 66.9987   | 0         | 0         | 18.2579   | 98.1622   | 0         | 79.9743   | 43.6416   | 20.2431    | 38.2186    | 31.0625    | aminophospholipid-transporting P-ATPase, putative                |
| PVX_123630 | 0         | 0         | 0         | 0         | 0         | 0         | 0         | 0         | 0         | 0          | 0          | 0          | raf kinase inhibitor, putative (RKIP)                            |
| PVX_123632 | 0         | 0         | 0         | 0         | 0         | 0         | 0         | 0         | 0         | 0          | 0          | 0          | conserved Plasmodium protein, unknown function                   |
| PVX_123635 | 0         | 0         | 464.662   | 0         | 0         | 0         | 0         | 0         | 0         | 130.723    | 37.0596    | 0          | D-ribulose-5-phosphate 3-epimerase, putative                     |
| PVX_123640 | 0         | 0         | 0         | 0         | 0         | 0         | 0         | 86.2736   | 0         | 0          | 0          | 0          | hypothetical protein, conserved                                  |
| PVX_123645 | 41.4944   | 57.9304   | 103.156   | 0         | 0         | 0         | 0         | 57.6208   | 15.7207   | 43.7405    | 33.0371    | 0          | pre-mRNA splicing factor PRP17, putative                         |
| PVX_123650 | 0         | 0         | 0         | 0         | 0         | 0         | 0         | 0         | 0         | 0          | 2.76905    | 0          | hypothetical protein, conserved                                  |
| PVX_123655 | 0         | 0         | 0         | 0         | 0         | 0         | 0         | 0         | 0         | 0          | 2.20869    | 0          | hypothetical protein, conserved                                  |

| Gene ID    | Patient | Patient 1 | Patient 2 | Patient 3 | Patient 4 | Patient 5 | Patient 6 | Patient 7 | Patient 8 | Patient 9 | Patient 10 | Patient 11 | Patient 12 | Gene Description                                                           |                                 |
|------------|---------|-----------|-----------|-----------|-----------|-----------|-----------|-----------|-----------|-----------|------------|------------|------------|----------------------------------------------------------------------------|---------------------------------|
| PVX_123660 |         | 0         | 0         | 0         | 0         | 0         | 265.52    | 0         | 72.0605   | 0         | 36.4623    | 10.3281    | 0          | debranching enzyme-associated ribonuclease, putative                       |                                 |
| PVX_123665 |         | 0         | 73.8376   | 0         | 0         | 33.5698   | 0         | 0         | 0         | 0         | 0          | 42.0776    | 0          | ribosome biogenesis protein TSR3, putative                                 |                                 |
| PVX_123670 |         | 0         | 0         | 0         | 0         | 0         | 0         | 0         | 0         | 80.691    | 0          | 63.5669    | 0          | hypothetical protein, conserved                                            |                                 |
| PVX_123675 |         | 0         | 0         | 0         | 0         | 0         | 0         | 0         | 0         | 0         | 0          | 0          | 0          | hypothetical protein, conserved                                            |                                 |
| PVX_123680 |         | 0         | 0         | 0         | 0         | 0         | 0         | 0         | 0         | 0         | 0          | 0          | 0          | unspecified product                                                        |                                 |
| PVX_123682 |         | 143.245   | 300.37    | 0         | 0         | 0         | 0         | 0         | 199.115   | 0         | 50.3073    | 28.5161    | 0          | heterochromatin protein 1, putative (HP1)                                  |                                 |
| PVX_123685 |         | 0         | 0         | 0         | 0         | 0         | 0         | 0         | 43.6801   | 5.95906   | 5.52845    | 9.39361    | 0          | histone-lysine N-methyltransferase, H3 lysine-4 specific, putative (SET10) |                                 |
| PVX_123690 |         | 0         | 0         | 0         | 0         | 0         | 0         | 0         | 0         | 0         | 0          | 0          | 0          | hypothetical protein, conserved                                            |                                 |
| PVX_123695 |         | 0         | 0         | 0         | 0         | 0         | 1228.9    | 0         | 0         | 90.5963   | 0          | 47.5451    | 0          | hypothetical protein, conserved                                            |                                 |
| PVX_123700 |         | 0         | 0         | 0         | 0         | 0         | 0         | 0         | 0         | 0         | 0          | 0          | 0          | hypothetical protein, conserved                                            |                                 |
| PVX_123705 |         | 0         | 0         | 0         | 0         | 0         | 0         | 0         | 0         | 0         | 0          | 0          | 0          | inner membrane complex protein 1h, putative (IMC1h)                        |                                 |
| PVX_123710 |         | 26.4245   | 0         | 0         | 0         | 0         | 0         | 40.3766   | 0         | 20.0204   | 27.857     | 15.7787    | 0          | hypothetical protein, conserved                                            |                                 |
| PVX_123715 |         | 82.1223   | 0         | 204.39    | 0         | 0         | 0         | 125.705   | 228.168   | 31.1217   | 0          | 130.776    | 133.086    | hypothetical protein, conserved                                            |                                 |
| PVX_123720 |         | 33.5338   | 0         | 0         | 107.129   | 10.6324   | 0         | 0         | 46.5627   | 0         | 23.5669    | 6.67467    | 0          | FbpA domain protein, putative                                              |                                 |
| PVX_123725 |         | 0         | 0         | 0         | 0         | 14.0944   | 0         | 0         | 0         | 16.8374   | 0          | 26.5375    | 0          | hypothetical protein, conserved                                            |                                 |
| PVX_123730 |         | 0         | 0         | 0         | 0         | 0         | 0         | 0         | 0         | 43.904    | 13.5734    | 15.3777    | 0          | hypothetical protein, conserved                                            |                                 |
| PVX_123735 |         | 0         | 47.6402   | 0         | 0         | 21.6498   | 0         | 0         | 0         | 0         | 0          | 0          | 0          | hypothetical protein, conserved                                            |                                 |
| PVX_123740 |         | 131.923   | 46.0588   | 0         | 210.917   | 83.7224   | 0         | 0         | 0         | 0         | 162.221    | 170.686    | 0          | hypothetical protein, conserved                                            |                                 |
| PVX_123745 |         | 58.4971   | 102.069   | 218.061   | 93.4281   | 46.3635   | 0         | 0         | 81.2216   | 22.1605   | 20.5558    | 128.077    | 0          | endoplasmic reticulum protein, putative (GRP94)                            |                                 |
| PVX_123750 |         | 10.6076   | 7.40167   | 0         | 0         | 10.0842   | 0         | 0         | 0         | 8.0359    | 0          | 10.5565    | 0          | transcription factor with AP2 domain(s), putative (ApiAP2)                 |                                 |
| PVX_123755 |         | 0         | 0         | 0         | 0         | 98.177    | 0         | 0         | 0         | 58.5279   | 162.627    | 92.1898    | 0          | hypothetical protein, conserved                                            |                                 |
| PVX_123760 |         | 8.81991   | 12.3083   | 0         | 0         | 0         | 0         | 0         | 0         | 10.0223   | 6.19924    | 33.3543    | 0          | transcription factor with AP2 domain(s), putative (AP2-G)                  |                                 |
| PVX_123765 |         | 0         | 0         | 0         | 0         | 0         | 0         | 0         | 0         | 0         | 0          | 0          | 0          | glideosome-associated protein 45, putative (GAP45)                         |                                 |
| PVX_123770 |         | 0         | 0         | 0         | 0         | 35.6374   | 0         | 0         | 0         | 0         | 0          | 0          | 0          | hypothetical protein, conserved                                            |                                 |
| PVX_123775 |         | 0         | 51.4056   | 0         | 0         | 0         | 0         | 0         | 0         | 0         | 51.7222    | 14.6526    | 0          | hypothetical protein, conserved                                            |                                 |
| PVX_123780 |         | 0         | 0         | 0         | 0         | 0         | 0         | 0         | 0         | 0         | 0          | 0          | 0          | hypothetical protein, conserved                                            |                                 |
| PVX_123785 |         | 0         | 0         | 198.902   | 255.658   | 0         | 0         | 222.05    | 0         | 56.1547   | 222.725    | 0          | 0          | CAMP-dependent protein kinase regulatory subunit, putative                 |                                 |
| PVX_123790 |         | 0         | 47.3153   | 0         | 0         | 21.5021   | 0         | 0         | 0         | 0         | 23.8059    | 53.9505    | 0          | nucleus export protein BRR6, putative                                      |                                 |
| PVX_123795 |         | 24.7715   | 0         | 0         | 0         | 7.85248   | 0         | 0         | 34.3931   | 18.7678   | 8.70486    | 4.93055    | 0          | DNA gyrase subunit A, putative (Gyra)                                      |                                 |
| PVX_123800 |         | 73.9652   | 25.8081   | 45.9398   | 59.0486   | 0         | 0         | 0         | 51.3439   | 49.0318   | 32.4908    | 55.2075    | 0          | phospholipid-transporting ATPase, putative                                 |                                 |
| PVX_123805 |         | 6.54443   | 9.13257   | 0         | 0         | 2.07363   | 0         | 0         | 9.99353   | 0         | 9.91536    | 0          | 3.90774    | 0                                                                          | hypothetical protein, conserved |
| PVX_123810 |         | 0         | 0         | 44.5939   | 0         | 5.68908   | 0         | 0         | 0         | 20.3982   | 6.3079     | 17.8636    | 0          | hypothetical protein, conserved                                            |                                 |
| PVX_123815 |         | 0         | 0         | 0         | 0         | 45.9835   | 0         | 221.835   | 0         | 109.67    | 50.7948    | 201.549    | 234.804    | hypothetical protein, conserved                                            |                                 |
| PVX_123820 |         | 0         | 43.5647   | 0         | 0         | 19.8108   | 0         | 0         | 0         | 47.2653   | 43.793     | 49.6413    | 0          | mitochondrial carrier protein, putative                                    |                                 |
| PVX_123825 |         | 336.595   | 117.672   | 0         | 539.698   | 160.614   | 0         | 0         | 233.996   | 127.634   | 177.295    | 201.027    | 273.402    | 50S ribosomal protein L24, putative                                        |                                 |
| PVX_123830 |         | 0         | 0         | 0         | 0         | 26.5824   | 0         | 0         | 0         | 95.2007   | 88.2499    | 100.009    | 135.707    | GTP cyclohydrolase I, putative (GCH1)                                      |                                 |
| PVX_123835 |         | 0         | 0         | 0         | 0         | 0         | 0         | 0         | 0         | 0         | 0          | 0          | 0          | hypothetical protein, conserved                                            |                                 |
| PVX_123840 |         | 0         | 0         | 0         | 0         | 12.3453   | 0         | 0         | 0         | 0         | 27.3594    | 7.74906    | 0          | hypothetical protein, conserved                                            |                                 |
| PVX_123845 |         | 146.186   | 178.567   | 0         | 0         | 150.65    | 0         | 55.8608   | 152.242   | 318.449   | 205.47     | 269.151    | 59.1506    | polyadenylate-binding protein, putative                                    |                                 |
| PVX_123850 |         | 0         | 65.0864   | 0         | 0         | 14.7854   | 0         | 71.2765   | 0         | 52.9862   | 65.5189    | 46.3949    | 0          | hypothetical protein, conserved                                            |                                 |
| PVX_123855 |         | 213.141   | 0         | 0         | 0         | 0         | 0         | 0         | 0         | 0         | 0          | 106.071    | 0          | histone chaperone ASF1, putative (ASF1)                                    |                                 |
| PVX_123860 |         | 0         | 127.007   | 0         | 0         | 115.588   | 0         | 0         | 0         | 137.749   | 127.543    | 108.471    | 0          | cytochrome c heme lyase, putative                                          |                                 |
| PVX_123865 |         | 0         | 17.3024   | 0         | 0         | 0         | 0         | 75.7605   | 0         | 9.3917    | 0          | 19.7386    | 40.1128    | hypothetical protein, conserved                                            |                                 |
| PVX_123870 |         | 0         | 0         | 0         | 214.561   | 21.2921   | 0         | 0         | 93.1994   | 25.4256   | 117.87     | 40.0685    | 0          | hypothetical protein, conserved                                            |                                 |
| PVX_123875 |         | 682.233   | 0         | 0         | 0         | 0         | 0         | 0         | 0         | 519.208   | 0          | 135.909    | 0          | splicing factor 3B subunit 6, putative (SF3B6)                             |                                 |
| PVX_123880 |         | 0         | 0         | 0         | 0         | 0         | 0         | 0         | 0         | 14.3928   | 13.3522    | 11.3439    | 0          | hypothetical protein, conserved                                            |                                 |
| PVX_123885 |         | 19.3677   | 0         | 48.1183   | 0         | 12.2774   | 0         | 29.5871   | 0         | 7.33657   | 27.2245    | 53.9692    | 0          | isoleucine-tRNA ligase, putative                                           |                                 |
| PVX_123890 |         | 24.8955   | 52.1239   | 0         | 0         | 15.7836   | 0         | 0         | 0         | 18.8618   | 8.74845    | 44.5971    | 0          | hypothetical protein, conserved                                            |                                 |
| PVX_123895 |         | 0         | 83.2937   | 0         | 0         | 0         | 0         | 0         | 0         | 45.186    | 0          | 0          | 0          | hypothetical protein, conserved                                            |                                 |
| PVX_123900 |         | 0         | 155.008   | 0         | 0         | 0         | 0         | 169.957   | 0         | 42.0471   | 38.9646    | 132.493    | 0          | hypothetical protein, conserved                                            |                                 |
| PVX_123905 |         | 140.961   | 49.2174   | 0         | 0         | 0         | 0         | 107.845   | 97.9002   | 53.4156   | 123.808    | 56.1176    | 114.182    | hypothetical protein, conserved                                            |                                 |
| PVX_123910 |         | 92.5553   | 43.0662   | 0         | 0         | 39.1254   | 0         | 47.148    | 42.8375   | 35.0631   | 21.6823    | 30.7041    | 0          | hypothetical protein, conserved                                            |                                 |
| PVX_123915 |         | 0         | 15.0575   | 107.218   | 0         | 6.83909   | 0         | 0         | 0         | 16.3467   | 22.7466    | 25.7674    | 0          | hypothetical protein, conserved                                            |                                 |
| PVX_123920 |         | 138.588   | 19.3448   | 137.759   | 0         | 43.9351   | 0         | 84.7083   | 38.4846   | 73.5011   | 107.14     | 154.475    | 44.8499    | ubiquitin-activating enzyme E1, putative                                   |                                 |
| PVX_123925 |         | 0         | 38.338    | 0         | 0         | 0         | 0         | 0         | 0         | 0         | 0          | 0          | 0          | hypothetical protein, conserved                                            |                                 |
| PVX_123930 |         | 0         | 0         | 0         | 0         | 0         | 0         | 0         | 0         | 13.1424   | 24.3798    | 20.7149    | 0          | hypothetical protein, conserved                                            |                                 |
| PVX_123935 |         | 221.585   | 77.4077   | 0         | 0         | 140.78    | 0         | 169.746   | 153.955   | 587.93    | 466.996    | 485.205    | 0          | haloacid dehalogenase-like hydrolase, putative (HAD3)                      |                                 |
| PVX_123940 |         | 0         | 0         | 0         | 0         | 13.2265   | 0         | 0         | 0         | 0         | 0          | 0          | 0          | hypothetical protein                                                       |                                 |
| PVX_123945 |         | 81.7473   | 171.28    | 0         | 0         | 51.8996   | 0         | 125.13    | 340.687   | 247.836   | 143.591    | 178.995    | 0          | haloacid dehalogenase-like hydrolase, putative (HAD2)                      |                                 |
| PVX_123950 |         | 37.8447   | 0         | 0         | 0         | 12.0005   | 0         | 0         | 0         | 14.3375   | 13.298     | 37.6639    | 0          | hypothetical protein, conserved                                            |                                 |
| PVX_123955 |         | 0         | 0         | 0         | 0         | 0         | 0         | 0         | 0         | 19.3628   | 26.9423    | 10.1737    | 41.3509    | hypothetical protein, conserved                                            |                                 |
| PVX_123960 |         | 0         | 0         | 0         | 484.743   | 48.0894   | 0         | 232.005   | 630.705   | 516.058   | 106.221    | 331.173    | 245.563    | proliferating cell nuclear antigen, putative                               |                                 |



| Gene ID    | Patient | Patient 1 | Patient 2 | Patient 3 | Patient 4 | Patient 5 | Patient 6 | Patient 7 | Patient 8 | Patient 9 | Patient 10 | Patient 11 | Patient 12 | Gene Description                                                            |
|------------|---------|-----------|-----------|-----------|-----------|-----------|-----------|-----------|-----------|-----------|------------|------------|------------|-----------------------------------------------------------------------------|
| PVX_123965 |         | 0         | 0         | 0         | 0         | 0         | 0         | 131.192   | 0         | 48.7679   | 90.4583    | 17.0809    | 0          | WD domain, G-beta repeat domain containing protein                          |
| PVX_123970 |         | 87.6736   | 0         | 0         | 280.515   | 0         | 0         | 0         | 243.604   | 99.6801   | 92.3979    | 104.713    | 0          | ataxin-3, putative (ATX3)                                                   |
| PVX_123975 |         | 60.9729   | 0         | 0         | 0         | 0         | 0         | 0         | 0         | 0         | 0          | 12.1367    | 0          | hypothetical protein, conserved                                             |
| PVX_123980 |         | 0         | 0         | 0         | 0         | 0         | 0         | 0         | 0         | 0         | 0          | 0          | 0          | hypothetical protein, conserved                                             |
| PVX_123985 |         | 0         | 96.0772   | 0         | 0         | 14.5501   | 0         | 70.1421   | 127.417   | 121.669   | 96.717     | 82.1836    | 74.2704    | ATP-dependent RNA helicase, putative                                        |
| PVX_123990 |         | 0         | 10.6193   | 0         | 0         | 4.82293   | 0         | 0         | 0         | 0         | 0          | 6.05794    | 0          | potassium channel, putative                                                 |
| PVX_123995 |         | 0         | 0         | 0         | 0         | 0         | 0         | 0         | 42.6024   | 0         | 0          | 0          | 0          | hypothetical protein, conserved                                             |
| PVX_124000 |         | 0         | 0         | 0         | 0         | 0         | 0         | 0         | 0         | 13.3546   | 12.3867    | 14.0329    | 0          | hypothetical protein, conserved                                             |
| PVX_124005 |         | 11.2616   | 0         | 0         | 0         | 7.13743   | 0         | 17.1994   | 15.6337   | 4.26572   | 0          | 11.2074    | 0          | hypothetical protein, conserved                                             |
| PVX_124010 |         | 0         | 0         | 0         | 0         | 0         | 0         | 0         | 0         | 52.7946   | 12.2421    | 34.6726    | 0          | hypothetical protein, conserved                                             |
| PVX_124015 |         | 0         | 23.5737   | 83.9447   | 0         | 21.4173   | 0         | 51.6189   | 0         | 12.7951   | 0          | 47.0577    | 0          | hypothetical protein, conserved                                             |
| PVX_124020 |         | 0         | 40.2225   | 0         | 0         | 18.2705   | 0         | 44.0331   | 0         | 43.6643   | 10.1257    | 45.8837    | 46.6276    | histone acetyltransferase, putative                                         |
| PVX_124025 |         | 0         | 0         | 0         | 0         | 0         | 0         | 0         | 0         | 54.3143   | 0          | 14.2654    | 0          | RNA pseudouridylylase, putative                                             |
| PVX_124030 |         | 0         | 0         | 0         | 0         | 102.805   | 0         | 0         | 224.685   | 0         | 340.513    | 64.3462    | 0          | hypothetical protein, conserved                                             |
| PVX_124035 |         | 75.0937   | 0         | 0         | 0         | 71.5014   | 0         | 0         | 104.312   | 85.3701   | 52.7634    | 59.7909    | 0          | hypothetical protein, conserved                                             |
| PVX_124040 |         | 0         | 0         | 0         | 0         | 12.9902   | 0         | 0         | 0         | 0         | 0          | 24.4603    | 0          | hypothetical protein, conserved                                             |
| PVX_124045 |         | 32.0334   | 0         | 0         | 0         | 0         | 0         | 0         | 0         | 12.1354   | 0          | 25.5041    | 0          | NIMA-related protein kinase (Pfnk-1), putative                              |
| PVX_124050 |         | 0         | 42.2645   | 0         | 96.7182   | 47.996    | 0         | 0         | 42.0401   | 57.3509   | 85.1158    | 42.1858    | 0          | hypothetical protein, conserved                                             |
| PVX_124055 |         | 174.322   | 60.8787   | 0         | 0         | 27.6721   | 0         | 0         | 0         | 0         | 30.6194    | 104.101    | 0          | hypothetical protein, conserved                                             |
| PVX_124060 |         | 0         | 0         | 0         | 0         | 0         | 0         | 0         | 0         | 0         | 0          | 0          | 0          | merozoite surface protein-9 precursor                                       |
| PVX_124065 |         | 0         | 40.7741   | 0         | 0         | 9.26059   | 0         | 0         | 40.5578   | 22.1315   | 0          | 46.5128    | 0          | hypothetical protein, conserved                                             |
| PVX_124070 |         | 71.8513   | 7.16224   | 0         | 0         | 3.25265   | 0         | 0         | 28.4986   | 19.4399   | 18.0363    | 28.6022    | 33.2017    | WD domain, G-beta repeat domain containing protein                          |
| PVX_124075 |         | 40.4078   | 0         | 0         | 0         | 12.814    | 0         | 0         | 0         | 15.3089   | 14.1984    | 16.086     | 0          | hypothetical protein, conserved                                             |
| PVX_124080 |         | 17.9103   | 49.994    | 0         | 0         | 5.67655   | 0         | 0         | 0         | 0         | 6.29401    | 17.8243    | 0          | hypothetical protein, conserved                                             |
| PVX_124085 |         | 107.403   | 42.827    | 76.2308   | 48.9915   | 38.9011   | 78.429    | 70.3085   | 21.3008   | 98.8028   | 53.9197    | 48.8624    | 99.2733    | multidrug resistance associated protein, putative,ABC transporter, putative |
| PVX_124090 |         | 65.3295   | 0         | 0         | 0         | 82.8529   | 0         | 99.843    | 90.7112   | 37.124    | 91.8251    | 117.03     | 52.8622    | hypothetical protein, conserved                                             |
| PVX_124095 |         | 815.88    | 285.359   | 509.398   | 654.753   | 519.543   | 0         | 0         | 567.386   | 1083.08   | 787.731    | 1137.02    | 663.374    | macrophage migration inhibitory factor, putative (MIF)                      |
| PVX_124100 |         | 250.024   | 130.932   | 0         | 0         | 39.665    | 0         | 191.237   | 694.53    | 331.584   | 285.491    | 311.047    | 101.24     | T-complex protein 1, gamma subunit, putative                                |
| PVX_124105 |         | 0         | 0         | 0         | 0         | 0         | 0         | 0         | 42.8523   | 23.3835   | 43.3796    | 86.0011    | 99.8858    | hypothetical protein, conserved                                             |
| PVX_124110 |         | 0         | 0         | 0         | 0         | 0         | 0         | 0         | 0         | 0         | 110.667    | 62.799     | 0          | hypothetical protein                                                        |
| PVX_124115 |         | 0         | 0         | 0         | 0         | 0         | 0         | 62.9337   | 0         | 0         | 15.9236    | 9.02053    | 0          | hypothetical protein, conserved                                             |
| PVX_124120 |         | 0         | 0         | 0         | 0         | 0         | 0         | 0         | 0         | 0         | 0          | 6.49889    | 0          | myosin D, putative                                                          |
| PVX_124130 |         | 0         | 0         | 0         | 0         | 0         | 0         | 0         | 0         | 0         | 0          | 33.3933    | 67.8931    | hypothetical protein, conserved                                             |
| PVX_124140 |         | 0         | 0         | 0         | 0         | 11.1873   | 0         | 24.5023   | 20.0562   | 24.8087   | 17.5641    | 0          | 0          | hypothetical protein, conserved                                             |
| PVX_124145 |         | 0         | 0         | 0         | 0         | 0         | 0         | 0         | 0         | 0         | 0          | 0          | 0          | thioredoxin-like associated protein 1, putative (TLAP1)                     |
| PVX_124150 |         | 32.9898   | 0         | 0         | 105.39    | 52.2988   | 0         | 0         | 91.6144   | 24.9957   | 34.7771    | 98.4961    | 0          | hypothetical protein, conserved                                             |
| PVX_124155 |         | 0         | 0         | 0         | 0         | 0         | 0         | 0         | 0         | 0         | 0          | 0          | 0          | hypothetical protein, conserved                                             |
| PVX_124160 |         | 249.37    | 87.1295   | 0         | 399.349   | 79.2432   | 0         | 382.231   | 0         | 47.2653   | 131.379    | 148.924    | 0          | ATP-dependent protease subunit ClpQ, putative                               |
| PVX_124165 |         | 62.6811   | 43.7665   | 0         | 0         | 0         | 0         | 174.119   | 23.751    | 44.0447   | 87.3372    | 0          | 0          | hypothetical protein, conserved                                             |
| PVX_124170 |         | 192.924   | 134.766   | 0         | 0         | 61.2639   | 0         | 0         | 0         | 36.5596   | 135.541    | 96.0087    | 0          | sun-family protein, putative                                                |
| PVX_124175 |         | 42.8453   | 29.9087   | 106.518   | 0         | 13.5878   | 0         | 0         | 0         | 97.3956   | 75.2737    | 34.1127    | 0          | protein transport protein SEC13, putative (SEC13)                           |
| PVX_124180 |         | 0         | 0         | 0         | 180.524   | 53.7454   | 0         | 86.3706   | 0         | 0         | 59.5237    | 22.4812    | 0          | conserved Plasmodium protein, unknown function                              |
| PVX_124185 |         | 0         | 0         | 0         | 0         | 0         | 0         | 57.0504   | 0         | 14.1402   | 0          | 0          | 0          | serine/threonine protein kinase RIO1, putative (RIO1)                       |
| PVX_124190 |         | 0         | 0         | 0         | 0         | 0         | 0         | 0         | 0         | 13.2606   | 0          | 13.9341    | 0          | hypothetical protein, conserved                                             |
| PVX_124195 |         | 0         | 152.92    | 0         | 0         | 139.054   | 0         | 167.663   | 0         | 248.887   | 76.8814    | 21.785     | 177.489    | ras-related protein Rab-2, putative (RAB2)                                  |
| PVX_124200 |         | 76.637    | 0         | 0         | 0         | 24.3246   | 0         | 0         | 0         | 29.0419   | 0          | 0          | 0          | hypothetical protein, conserved                                             |
| PVX_124700 |         | 0         | 0         | 0         | 0         | 0         | 0         | 0         | 0         | 0         | 0          | 0          | 0          | VIR protein, pseudogene,PIR protein                                         |
| PVX_124705 |         | 0         | 0         | 0         | 0         | 0         | 0         | 0         | 0         | 0         | 26.5824    | 0          | 0          | variable surface protein Vir12-related,PIR protein                          |
| PVX_124708 |         | 0         | 0         | 0         | 0         | 0         | 0         | 0         | 0         | 20.8444   | 38.6582    | 10.9504    | 0          | VIR protein,PIR protein                                                     |
| PVX_124710 |         | 0         | 0         | 0         | 0         | 0         | 0         | 0         | 0         | 0         | 0          | 0          | 0          | variable surface protein Vir4-related,PIR protein                           |
| PVX_124712 |         | 0         | 0         | 0         | 0         | 0         | 0         | 0         | 0         | 0         | 0          | 0          | 0          | VIR protein, pseudogene,PIR protein, pseudogene                             |
| PVX_124715 |         | 0         | 0         | 0         | 0         | 0         | 0         | 0         | 0         | 0         | 0          | 0          | 0          | variable surface protein Vir5-related,PIR protein                           |
| PVX_124720 |         | 0         | 0         | 0         | 0         | 0         | 0         | 0         | 0         | 0         | 0          | 11.2833    | 0          | variable surface protein Vir12-related,PIR protein                          |
| PVX_124725 |         | 0         | 0         | 0         | 0         | 0         | 0         | 0         | 0         | 0         | 0          | 0          | 0          | VIR protein,PIR protein                                                     |
| PVX_125726 |         | 0         | 0         | 0         | 0         | 0         | 0         | 0         | 0         | 0         | 0          | 0          | 0          | hypothetical protein                                                        |
| PVX_125728 |         | 0         | 0         | 0         | 0         | 0         | 0         | 0         | 0         | 0         | 0          | 0          | 0          | tryptophan-rich antigen (Pv-fam-a)                                          |
| PVX_125730 |         | 0         | 58.7036   | 0         | 0         | 0         | 0         | 0         | 0         | 31.8529   | 29.5271    | 66.9233    | 136.218    | tryptophan-rich antigen (Pv-fam-a)                                          |
| PVX_125735 |         | 0         | 158.524   | 0         | 0         | 24.0155   | 0         | 105.107   | 28.6734   | 0         | 0          | 15.0615    | 0          | hypothetical protein                                                        |
| PVX_125738 |         | 0         | 0         | 0         | 0         | 0         | 0         | 0         | 0         | 0         | 0          | 0          | 0          | reticulocyte binding protein 1 precursor, putative                          |
| PVX_127260 |         | 0         | 0         | 0         | 0         | 0         | 0         | 0         | 0         | 0         | 0          | 0          | 0          | variable surface protein Vir16, putative, truncated                         |
| PVX_128260 |         | 0         | 0         | 0         | 0         | 0         | 0         | 0         | 0         | 0         | 0          | 29.5571    | 0          | Pvstp1, truncated, putative                                                 |
| PVX_129260 |         | 0         | 0         | 0         | 0         | 0         | 0         | 3467.26   | 0         | 0         | 1420.66    | 0          | 0          | variable surface protein Vir12, putative                                    |

| Gene ID    | Patient 1 | Patient 2 | Patient 3 | Patient 4 | Patient 5 | Patient 6 | Patient 7 | Patient 8 | Patient 9 | Patient 10 | Patient 11 | Patient 12 | Gene Description                                           |
|------------|-----------|-----------|-----------|-----------|-----------|-----------|-----------|-----------|-----------|------------|------------|------------|------------------------------------------------------------|
| Patient    |           |           |           |           |           |           |           |           |           |            |            |            |                                                            |
| PVX_130260 | 0         | 0         | 0         | 0         | 0         | 0         | 552.656   | 0         | 0         | 247.906    | 0          | 0          | variable surface protein Vir12, truncated, putative        |
| PVX_131260 | 0         | 98.3878   | 0         | 0         | 0         | 0         | 0         | 0         | 106.735   | 0          | 28.0226    | 0          | variable surface protein Vir12, truncated, putative        |
| PVX_132260 | 0         | 0         | 0         | 0         | 0         | 0         | 0         | 0         | 0         | 0          | 0          | 0          | Pvstp1, truncated, putative                                |
| PVX_133260 | 0         | 0         | 0         | 0         | 0         | 0         | 0         | 0         | 0         | 0          | 29.5571    | 0          | variable surface protein Vir12, putative, truncated        |
| PVX_134260 | 0         | 0         | 0         | 0         | 0         | 0         | 0         | 0         | 0         | 0          | 0          | 0          | variable surface protein Vir12, putative, truncated        |
| PVX_135260 | 0         | 0         | 0         | 0         | 0         | 0         | 0         | 0         | 0         | 0          | 0          | 0          | hypothetical protein, truncated                            |
| PVX_136260 | 134.878   | 94.4287   | 0         | 433.769   | 43.0139   | 0         | 415.402   | 0         | 51.1803   | 47.3386    | 53.7098    | 0          | DNA-directed RNA polymerase 2 subunit, putative, truncated |
| PVX_137260 | 0         | 0         | 0         | 0         | 0         | 0         | 0         | 0         | 0         | 0          | 0          | 0          | dihydrolypoamide S-acetyltransferase, truncated, putative  |
| PVX_138260 | 1297.4    | 958.259   | 461.667   | 593.403   | 388.592   | 190.026   | 567.937   | 1313.51   | 1531.51   | 1080.7     | 988.785    | 541.095    | elongation factor 1 alpha, pseudogene, putative            |
| PVX_139260 | 0         | 0         | 0         | 0         | 0         | 0         | 0         | 0         | 0         | 0          | 0          | 0          | variable surface protein Vir3, truncated, putative         |
| PVX_140260 | 0         | 0         | 0         | 186.385   | 0         | 0         | 0         | 0         | 0         | 20.4447    | 11.5869    | 0          | helicase, putative                                         |
| PVX_141260 | 0         | 0         | 0         | 0         | 0         | 0         | 0         | 0         | 0         | 0          | 0          | 0          | variable surface protein Vir17, putative                   |
| PVX_142260 | 0         | 0         | 0         | 0         | 0         | 0         | 0         | 0         | 0         | 0          | 0          | 0          | cytochrome c oxidase subunit III, putative                 |
| PVX_143260 | 0         | 0         | 0         | 0         | 0         | 0         | 0         | 0         | 0         | 0          | 0          | 0          | variable surface protein Vir35, putative                   |
| PVX_144260 | 0         | 0         | 0         | 0         | 0         | 0         | 0         | 0         | 0         | 0          | 0          | 0          | variable surface protein Vir17, putative, pseudogene       |
| PVX_145260 | 0         | 0         | 0         | 0         | 0         | 0         | 0         | 0         | 0         | 0          | 0          | 0          | variable surface protein Vir30, putative                   |
| PVX_146260 | 0         | 0         | 0         | 0         | 0         | 0         | 0         | 0         | 0         | 0          | 0          | 0          | variable surface protein Vir11, putative                   |
| PVX_147260 | 810.754   | 142.152   | 1018.18   | 0         | 324.281   | 1048.31   | 626.976   | 0         | 384.917   | 284.361    | 322.909    | 662.977    | ribosomal protein L21e, putative, truncated                |
| PVX_148260 | 0         | 0         | 0         | 0         | 0         | 0         | 0         | 0         | 0         | 0          | 0          | 0          | variable surface protein Vir25, truncated, putative        |
| PVX_149260 | 0         | 0         | 0         | 0         | 0         | 0         | 0         | 0         | 0         | 0          | 0          | 0          | variable surface protein Vir14, truncated, putative        |
| PVX_150260 | 0         | 0         | 0         | 0         | 0         | 0         | 0         | 0         | 0         | 0          | 20.1807    | 0          | variable surface protein Vir27, truncated, putative        |
| PVX_151260 | 0         | 0         | 0         | 0         | 0         | 0         | 0         | 0         | 0         | 0          | 0          | 0          | Pvstp1, pseudogene, putative                               |
| PVX_152260 | 0         | 0         | 0         | 0         | 0         | 0         | 0         | 0         | 0         | 0          | 0          | 0          | variable surface protein Vir17, pseudogene, putative       |
| PVX_153260 | 0         | 0         | 0         | 0         | 0         | 0         | 0         | 0         | 0         | 0          | 0          | 0          | variable surface protein Vir17, truncated, putative        |
| PVX_154260 | 0         | 0         | 0         | 0         | 0         | 0         | 0         | 0         | 0         | 0          | 0          | 0          | variable surface protein Vir23, pseudogene                 |
| PVX_155260 | 0         | 0         | 0         | 0         | 0         | 0         | 0         | 0         | 0         | 0          | 0          | 0          | variable surface protein Vir3, pseudogene, putative        |
| PVX_156260 | 0         | 0         | 0         | 0         | 0         | 0         | 0         | 0         | 0         | 0          | 0          | 0          | variable surface protein Vir5, pseudogene, putative        |
| PVX_157260 | 0         | 0         | 0         | 0         | 0         | 0         | 0         | 0         | 0         | 0          | 0          | 0          | variable surface protein Vir12, truncated, putative        |
| PVX_158260 | 0         | 0         | 0         | 0         | 0         | 0         | 0         | 0         | 0         | 0          | 0          | 0          | variable surface protein Vir12, truncated, putative        |
| PVX_159260 | 0         | 0         | 0         | 0         | 0         | 0         | 0         | 0         | 0         | 0          | 0          | 0          | variable surface protein Vir14, pseudogene, putative       |
| PVX_160260 | 0         | 0         | 0         | 0         | 0         | 0         | 0         | 0         | 0         | 0          | 0          | 0          | variable surface protein Vir3, truncated, putative         |
| PVX_161260 | 0         | 0         | 0         | 0         | 0         | 0         | 0         | 0         | 0         | 0          | 0          | 0          | variable surface protein Vir3, truncated, putative         |
| PVX_162260 | 0         | 0         | 0         | 0         | 0         | 0         | 0         | 0         | 0         | 0          | 0          | 0          | variable surface protein Vir5, pseudogene, putative        |
| PVX_163260 | 0         | 0         | 0         | 0         | 0         | 0         | 0         | 0         | 0         | 0          | 0          | 0          | variable surface protein Vir35, pseudogene, putative       |
| PVX_163265 | 0         | 0         | 0         | 0         | 0         | 0         | 0         | 0         | 0         | 0          | 0          | 0          | variable surface protein Vir30, pseudogene, putative       |
| PVX_164265 | 0         | 0         | 0         | 0         | 0         | 0         | 0         | 0         | 0         | 0          | 0          | 0          | variable surface protein Vir21, putative                   |
| PVX_165265 | 0         | 0         | 0         | 0         | 0         | 0         | 0         | 0         | 0         | 0          | 0          | 0          | Pvstp1, truncated, putative                                |
| PVX_166265 | 0         | 0         | 0         | 0         | 0         | 0         | 0         | 0         | 0         | 0          | 0          | 0          | Pvstp1, truncated, putative                                |
| PVX_167265 | 0         | 0         | 0         | 0         | 0         | 0         | 0         | 0         | 0         | 0          | 0          | 0          | variable surface protein Vir15, truncated, putative        |
| PVX_168265 | 0         | 0         | 0         | 0         | 0         | 0         | 0         | 0         | 0         | 0          | 0          | 0          | variable surface protein Vir16, pseudogene, putative       |
| PVX_168270 | 0         | 0         | 0         | 0         | 0         | 0         | 0         | 0         | 0         | 0          | 0          | 0          | variable surface protein Vir15, pseudogene, putative       |
| PVX_169270 | 0         | 0         | 0         | 0         | 0         | 0         | 0         | 0         | 0         | 0          | 0          | 0          | variable surface protein Vir14, putative                   |
| PVX_170270 | 0         | 78.9742   | 0         | 0         | 0         | 0         | 0         | 0         | 0         | 0          | 0          | 0          | variable surface protein Vir12, truncated, putative        |
| PVX_171270 | 0         | 0         | 0         | 0         | 0         | 0         | 0         | 0         | 0         | 0          | 0          | 0          | variable surface protein Vir17, pseudogene, putative       |
| PVX_172270 | 0         | 0         | 0         | 0         | 0         | 0         | 0         | 0         | 0         | 0          | 0          | 0          | variable surface protein Vir22, truncated, putative        |
| PVX_173270 | 0         | 0         | 0         | 0         | 0         | 0         | 0         | 0         | 0         | 0          | 0          | 0          | variable surface protein Vir23, putative                   |
| PVX_174270 | 0         | 0         | 0         | 0         | 0         | 0         | 0         | 0         | 0         | 0          | 0          | 0          | variable surface protein Vir6-like, pseudogene             |
| PVX_175270 | 0         | 56.9371   | 0         | 0         | 0         | 0         | 0         | 0         | 0         | 28.6398    | 0          | 0          | variable surface protein Vir14, truncated, putative        |
| PVX_176270 | 0         | 0         | 0         | 0         | 0         | 0         | 0         | 0         | 0         | 0          | 0          | 0          | variable surface protein Vir8                              |
| PVX_176275 | 0         | 0         | 0         | 0         | 0         | 0         | 0         | 0         | 0         | 0          | 0          | 0          | variable surface protein Vir9, pseudogene, putative        |
| PVX_177275 | 0         | 79.8836   | 0         | 0         | 0         | 0         | 0         | 0         | 0         | 0          | 0          | 0          | variable surface protein Vir7, putative                    |
| PVX_178275 | 0         | 0         | 0         | 0         | 0         | 0         | 0         | 0         | 0         | 0          | 0          | 0          | variable surface protein Vir11, putative                   |
| PVX_179275 | 0         | 0         | 0         | 0         | 0         | 0         | 0         | 0         | 0         | 0          | 0          | 0          | variable surface protein Vir C1-29, pseudogene, putative   |
| PVX_180275 | 0         | 0         | 0         | 0         | 0         | 0         | 0         | 0         | 0         | 0          | 0          | 0          | variable surface protein Vir26-like, truncated             |
| PVX_181275 | 0         | 0         | 0         | 0         | 0         | 0         | 0         | 0         | 0         | 0          | 0          | 0          | variable surface protein Vir17, pseudogene, putative       |
| PVX_182275 | 0         | 0         | 0         | 0         | 0         | 0         | 0         | 0         | 0         | 0          | 0          | 0          | variable surface protein Vir11, truncated, putative        |
| PVX_183275 | 0         | 0         | 0         | 0         | 0         | 0         | 0         | 0         | 0         | 32.4518    | 0          | 0          | hypothetical protein                                       |
| PVX_183280 | 0         | 55.3717   | 0         | 0         | 0         | 0         | 0         | 0         | 0         | 27.8536    | 47.3463    | 0          | variable surface protein Vir12-related                     |
| PVX_184280 | 0         | 0         | 0         | 0         | 0         | 0         | 0         | 0         | 0         | 0          | 0          | 0          | variable surface protein Vir5, pseudogene, putative        |
| PVX_184285 | 0         | 0         | 0         | 0         | 0         | 0         | 0         | 0         | 0         | 0          | 0          | 0          | variable surface protein Vir4, putative                    |
| PVX_185285 | 0         | 0         | 0         | 0         | 0         | 0         | 0         | 0         | 0         | 0          | 0          | 0          | variable surface protein Vir2, truncated, putative         |
| PVX_186285 | 0         | 0         | 0         | 0         | 0         | 0         | 0         | 0         | 0         | 0          | 0          | 0          | variable surface protein Vir3, truncated, pseudogene       |

| Gene ID    | Patient | Patient 1 | Patient 2 | Patient 3 | Patient 4 | Patient 5 | Patient 6 | Patient 7 | Patient 8 | Patient 9 | Patient 10 | Patient 11 | Patient 12 | Gene Description                                                             |
|------------|---------|-----------|-----------|-----------|-----------|-----------|-----------|-----------|-----------|-----------|------------|------------|------------|------------------------------------------------------------------------------|
| PVX_186290 |         | 0         | 0         | 0         | 0         | 0         | 0         | 0         | 0         | 0         | 0          | 0          | 0          | variable surface protein Vir15-related, truncated                            |
| PVX_187290 |         | 0         | 0         | 0         | 0         | 0         | 0         | 0         | 0         | 0         | 0          | 0          | 0          | circumsporozoite protein, truncated, putative                                |
| PVX_188290 |         | 0         | 0         | 0         | 0         | 0         | 0         | 0         | 0         | 0         | 0          | 0          | 0          | circumsporozoite protein, truncated, putative                                |
| PVX_191290 |         | 33.7071   | 0         | 0         | 107.99    | 0         | 0         | 0         | 0         | 29.8166   | 0          | 6.71008    | 0          | adrenodoxin reductase, putative                                              |
| PVX_192290 |         | 36.4531   | 0         | 0         | 116.824   | 0         | 0         | 0         | 0         | 13.8206   | 0          | 7.25682    | 0          | adrenodoxin reductase, putative                                              |
| PVX_193290 |         | 0         | 30.0062   | 0         | 0         | 0         | 0         | 0         | 0         | 0         | 0          | 0          | 0          | hypothetical protein                                                         |
| PVX_195290 |         | 17.6541   | 36.9758   | 43.9024   | 0         | 0         | 0         | 0         | 24.5179   | 60.2009   | 37.2173    | 15.8131    | 42.8796    | vivapain-1                                                                   |
| PVX_196290 |         | 30.7298   | 64.3947   | 0         | 0         | 0         | 0         | 0         | 0         | 11.6464   | 10.795     | 61.1703    | 0          | developmentally regulated GTP-binding protein 1, putative                    |
| PVX_198290 |         | 0         | 0         | 0         | 0         | 0         | 0         | 0         | 89.2488   | 0         | 11.2878    | 6.39515    | 0          | RNA helicase, putative                                                       |
| PVX_200290 |         | 0         | 17.3774   | 0         | 0         | 15.8045   | 0         | 38.1165   | 34.5603   | 9.42678   | 8.73429    | 25.9893    | 40.348     | DNA polymerase epsilon subunit B                                             |
| PVX_201290 |         | 0         | 20.0247   | 0         | 0         | 18.2161   | 0         | 43.9389   | 39.8229   | 10.8616   | 10.0615    | 22.8129    | 46.508     | DNA polymerase epsilon subunit B, truncated, putative                        |
| PVX_202290 |         | 16.3577   | 0         | 0         | 52.3043   | 10.381    | 0         | 0         | 0         | 14.4628   | 0          | 16.2801    | 0          | adrenodoxin reductase, putative                                              |
| PVX_203290 |         | 0         | 32.6691   | 232.878   | 0         | 0         | 0         | 0         | 0         | 0         | 32.8586    | 18.6196    | 0          | PST-A protein, truncated                                                     |
| PVX_206290 |         | 0         | 17.3532   | 0         | 0         | 15.7825   | 0         | 38.0634   | 34.5123   | 9.41369   | 8.72217    | 25.9532    | 40.2918    | DNA polymerase epsilon subunit B, putative                                   |
| PVX_208290 |         | 0         | 15.3672   | 0         | 0         | 13.9739   | 0         | 33.698    | 30.5638   | 8.33703   | 7.72591    | 22.9867    | 35.6728    | DNA polymerase epsilon subunit B, putative                                   |
| PVX_209290 |         | 0         | 21.93     | 0         | 0         | 0         | 0         | 0         | 0         | 14.2832   | 0          | 2.5014     | 0          | cleavage and polyadenylation specificity factor protein, putative            |
| PVX_210290 |         | 0         | 0         | 0         | 0         | 0         | 0         | 0         | 0         | 0         | 8.95818    | 30.464     | 0          | citrate synthase, mitochondrial precursor, putative, truncated               |
| PVX_211290 |         | 60.163    | 0         | 0         | 0         | 0         | 0         | 0         | 0         | 9.12234   | 0          | 5.98821    | 0          | citrate synthase, mitochondrial precursor, putative                          |
| PVX_212290 |         | 0         | 0         | 0         | 0         | 0         | 0         | 0         | 0         | 0         | 0          | 0          | 0          | ribose 5-phosphate epimerase, putative                                       |
| PVX_213290 |         | 0         | 0         | 0         | 0         | 0         | 0         | 0         | 0         | 0         | 0          | 0          | 0          | hypothetical protein                                                         |
| PVX_214290 |         | 0         | 0         | 0         | 0         | 0         | 0         | 0         | 0         | 0         | 0          | 9.02839    | 0          | hypothetical protein                                                         |
| PVX_215290 |         | 0         | 0         | 0         | 0         | 0         | 0         | 0         | 0         | 0         | 0          | 9.02839    | 0          | hypothetical protein                                                         |
| PVX_216290 |         | 35.2505   | 0         | 0         | 0         | 0         | 0         | 0         | 0         | 13.3674   | 12.3778    | 7.01769    | 0          | hypothetical protein, conserved                                              |
| PVX_217290 |         | 42.8447   | 0         | 0         | 0         | 0         | 0         | 0         | 0         | 16.2515   | 15.0416    | 8.52998    | 0          | hypothetical protein                                                         |
| PVX_218290 |         | 35.2505   | 0         | 0         | 0         | 0         | 0         | 0         | 0         | 13.3674   | 12.3778    | 7.01769    | 0          | hypothetical protein                                                         |
| PVX_220290 |         | 395.326   | 345.641   | 987.117   | 0         | 220.237   | 507.963   | 607.367   | 1374.52   | 1087.03   | 728.698    | 708.337    | 482.06     | cyclophilin, putative                                                        |
| PVX_221290 |         | 0         | 31.3155   | 0         | 0         | 0         | 0         | 0         | 0         | 0         | 0          | 8.91989    | 0          | cleavage and polyadenylation specificity factor protein, putative, truncated |
| PVX_222290 |         | 28.9691   | 60.7011   | 0         | 0         | 0         | 0         | 0         | 0         | 10.9787   | 10.1767    | 57.6651    | 0          | developmentally regulated GTP-binding protein 1, putative                    |
| PVX_223290 |         | 0         | 0         | 0         | 0         | 0         | 0         | 0         | 0         | 0         | 9.39992    | 31.9675    | 0          | citrate synthase, mitochondrial precursor, putative, truncated               |
| PVX_224290 |         | 78.3988   | 0         | 0         | 0         | 0         | 0         | 0         | 0         | 11.8903   | 0          | 7.80365    | 0          | citrate synthase, mitochondrial precursor, putative                          |
| PVX_225290 |         | 0         | 0         | 0         | 0         | 0         | 0         | 0         | 0         | 0         | 10.1426    | 34.4955    | 0          | citrate synthase, mitochondrial precursor, putative, truncated               |
| PVX_226290 |         | 38.001    | 0         | 0         | 0         | 0         | 0         | 0         | 0         | 11.5264   | 0          | 7.56502    | 123.41     | citrate synthase, mitochondrial precursor, putative                          |
| PVX_227290 |         | 0         | 0         | 0         | 0         | 0         | 0         | 0         | 0         | 0         | 0          | 0          | 0          | hypothetical protein                                                         |
| PVX_228290 |         | 21.1717   | 0         | 0         | 0         | 0         | 0         | 0         | 0         | 6.41883   | 5.95011    | 28.6577    | 0          | citrate synthase, mitochondrial precursor, putative                          |
| PVX_230290 |         | 0         | 0         | 0         | 0         | 0         | 0         | 0         | 0         | 0         | 0          | 18.3768    | 0          | hypothetical protein, conserved, truncated                                   |
| PVX_231290 |         | 0         | 0         | 0         | 0         | 0         | 0         | 157.441   | 0         | 77.7176   | 71.9395    | 61.191     | 0          | hypothetical protein                                                         |
| PVX_232290 |         | 0         | 0         | 0         | 0         | 0         | 0         | 0         | 0         | 0         | 0          | 0          | 0          | phosphatidylethanolamine-binding protein, putative                           |
| PVX_233290 |         | 35.2505   | 0         | 0         | 0         | 0         | 0         | 0         | 0         | 13.3674   | 12.3778    | 7.01769    | 0          | hypothetical protein                                                         |
| PVX_238290 |         | 0         | 0         | 0         | 0         | 0         | 0         | 0         | 0         | 0         | 69.0287    | 39.2386    | 0          | hypothetical protein                                                         |
| PVX_239290 |         | 0         | 0         | 0         | 0         | 0         | 0         | 0         | 0         | 97.8038   | 0          | 8.55982    | 0          | vivapain-1                                                                   |
| PVX_240290 |         | 38.1591   | 79.9859   | 95.0588   | 0         | 0         | 0         | 0         | 53.0272   | 43.3928   | 80.4198    | 15.1922    | 0          | vivapain-1                                                                   |
| PVX_241290 |         | 0         | 0         | 0         | 0         | 0         | 0         | 0         | 0         | 0         | 0          | 0          | 0          | variable surface protein Vir12-like                                          |
| PVX_241295 |         | 0         | 0         | 0         | 0         | 0         | 0         | 0         | 0         | 0         | 0          | 0          | 0          | variable surface protein Vir18, putative                                     |
| PVX_242295 |         | 0         | 0         | 0         | 0         | 0         | 0         | 0         | 0         | 0         | 0          | 0          | 0          | Pvstp1, truncated, putative                                                  |
| PVX_243295 |         | 0         | 0         | 0         | 0         | 0         | 0         | 0         | 0         | 0         | 0          | 0          | 0          | cytochrome c oxidase subunit III, pseudogene                                 |
| PVX_244295 |         | 0         | 0         | 0         | 0         | 0         | 0         | 0         | 0         | 0         | 0          | 0          | 0          | cytochrome c oxidase subunit III, truncated, putative                        |
| PVX_245295 |         | 0         | 0         | 0         | 0         | 0         | 0         | 0         | 0         | 0         | 0          | 0          | 0          | cytochrome c oxidase subunit III, pseudogene                                 |
| PVX_246295 |         | 0         | 0         | 0         | 0         | 0         | 0         | 0         | 0         | 24.5572   | 15.1679    | 34.388     | 0          | hypothetical protein, truncated                                              |
| PVX_248300 |         | 0         | 0         | 0         | 0         | 0         | 0         | 0         | 0         | 0         | 0          | 0          | 0          | variable surface protein Vir29, pseudogene, putative                         |
| PVX_249300 |         | 0         | 0         | 0         | 0         | 0         | 0         | 0         | 0         | 0         | 17.2776    | 9.79085    | 0          | hypothetical protein                                                         |
| PVX_250300 |         | 53.0327   | 0         | 0         | 0         | 0         | 0         | 81.2396   | 0         | 0         | 0          | 31.6704    | 86.0016    | ADP/ATP transporter on adenylate translocase, putative                       |
| PVX_251300 |         | 0         | 41.8252   | 0         | 0         | 0         | 0         | 0         | 0         | 0         | 0          | 0          | 0          | hypothetical protein                                                         |
| PVX_252300 |         | 94.6262   | 165.247   | 0         | 0         | 30.0476   | 0         | 72.4515   | 197.205   | 125.522   | 99.7217    | 103.599    | 0          | casein kinase II, alpha subunit, putative                                    |
| PVX_253300 |         | 0         | 0         | 0         | 0         | 15.4159   | 0         | 67.4483   | 18.3989   | 68.2113   | 9.66337    | 157.408    | 0          | syntaxin, putative                                                           |
| PVX_254300 |         | 0         | 36.3598   | 0         | 0         | 16.5304   | 0         | 0         | 0         | 39.4533   | 36.5638    | 41.4413    | 0          | mitochondrial carrier protein, putative                                      |
