# Supplementary material for: Plasmodium vivax readiness to transmit: implication for malaria eradication
Source: Springer Nature journal article supplement (doi:10.1186/s12918-018-0669-4), 2019-01-11
Supplement: 12918_2018_669_MOESM3_ESM.pdf [file 12918_2018_669_MOESM3_ESM.pdf]

# S2 Table

| GeneID     | Pvalue      | BackGroundPre | BackGroundDx |
|------------|-------------|---------------|--------------|
| PlvioMp1   | 1           | 0             | 0            |
| PlvioMp2   | 1           | 0             | 0            |
| PlvioMp3   | 0.359317338 | 0             | 0.294451006  |
| PVX_000000 | 1           | 0             | 0            |
| PVX_000005 | 0.007054102 | 0             | 2.083283255  |
| PVX_000010 | 1.03E-05    | 0             | 7.257606641  |
| PVX_000015 | 0.078805602 | 0             | 1.24853291   |
| PVX_000020 | 1           | 0             | 0            |
| PVX_000025 | 1           | 0             | 0            |
| PVX_000525 | 0.359317338 | 0             | 0.189773385  |
| PVX_000530 | 0.036687443 | 0             | 0.55458053   |
| PVX_000535 | 0.016473156 | 0             | 1.624619874  |
| PVX_000540 | 0.359317338 | 0             | 0.179253224  |
| PVX_000545 | 0.001084333 | 0             | 3.106887107  |
| PVX_000550 | 0.036687443 | 0             | 1.121133922  |
| PVX_000555 | 0.078805602 | 0             | 1.08095978   |
| PVX_000560 | 0.036687443 | 0             | 1.061933816  |
| PVX_000565 | 0.002855585 | 0             | 2.228957738  |
| PVX_000570 | 0.359317338 | 0             | 0.347601856  |
| PVX_000575 | 0.002855585 | 0             | 2.288426204  |
| PVX_000580 | 0.002855585 | 0             | 2.936251361  |
| PVX_000585 | 0.016473156 | 0             | 1.749686564  |
| PVX_000590 | 3.76E-05    | 0             | 5.305878424  |
| PVX_000595 | 0.166224591 | 0             | 0.463616188  |
| PVX_000600 | 0.000383392 | 0             | 3.120831128  |
| PVX_000604 | 0.000383392 | 0             | 3.653425844  |
| PVX_000606 | 0.166224591 | 0             | 0.770870781  |
| PVX_000610 | 3.76E-05    | 0             | 4.910105591  |
| PVX_000615 | 0.036687443 | 0             | 1.29249639   |
| PVX_000620 | 0.000383392 | 0             | 3.027364591  |
| PVX_000625 | 0.001084333 | 0             | 2.491165189  |
| PVX_000630 | 0.002855585 | 0             | 2.802119348  |
| PVX_000635 | 0.166224591 | 0             | 0.64389557   |
| PVX_000640 | 0.016473156 | 0             | 1.864254395  |
| PVX_000645 | 0.359317338 | 0             | 0.25180039   |
| PVX_000650 | 0.000383392 | 0             | 2.564190592  |
| PVX_000660 | 0.036687443 | 0             | 0.614144898  |
| PVX_000670 | 0.078805602 | 0             | 0.774528265  |

| GeneID     | Pvalue      | BackGroundPre | BackGroundDx |
|------------|-------------|---------------|--------------|
| PVX_000675 | 1           | 0             | 0            |
| PVX_000677 | 1           | 0             | 0            |
| PVX_000678 | 1           | 0             | 0            |
| PVX_000680 | 0.036687443 | 0             | 1.013930035  |
| PVX_000685 | 0.036687443 | 0             | 1.469892729  |
| PVX_000690 | 0.036687443 | 0             | 1.085083317  |
| PVX_000695 | 0.166224591 | 0             | 0.683013674  |
| PVX_000700 | 0.166224591 | 0             | 0.574261563  |
| PVX_000705 | 0.002855585 | 0             | 2.186469025  |
| PVX_000710 | 0.036687443 | 0             | 0.826264759  |
| PVX_000715 | 0.007054102 | 0             | 1.684346355  |
| PVX_000720 | 0.001084333 | 0             | 3.275800336  |
| PVX_000725 | 0.016473156 | 0             | 1.871770847  |
| PVX_000730 | 0.002855585 | 0             | 2.585196306  |
| PVX_000735 | 0.002855585 | 0             | 1.904912843  |
| PVX_000737 | 1           | 0             | 0            |
| PVX_000738 | 1           | 0             | 0            |
| PVX_000745 | 0.007054102 | 0             | 1.988503394  |
| PVX_000750 | 1           | 0             | 0            |
| PVX_000755 | 0.001084333 | 0             | 3.224349479  |
| PVX_000760 | 1           | 0             | 0            |
| PVX_000765 | 0.001084333 | 0             | 2.548037851  |
| PVX_000770 | 0.036687443 | 0             | 1.282617701  |
| PVX_000775 | 0.002855585 | 0             | 2.685798755  |
| PVX_000780 | 0.001084333 | 0             | 2.590665992  |
| PVX_000785 | 0.007054102 | 0             | 1.903313429  |
| PVX_000790 | 0.016473156 | 0             | 1.420813571  |
| PVX_000795 | 0.016473156 | 0             | 1.197477494  |
| PVX_000800 | 0.002855585 | 0             | 2.298660614  |
| PVX_000805 | 0.166224591 | 0             | 0.560571095  |
| PVX_000810 | 1           | 0             | 0            |
| PVX_000815 | 1           | 0             | 0            |
| PVX_000820 | 0.036687443 | 0             | 1.087612963  |
| PVX_000825 | 0.036687443 | 0             | 1.366489386  |
| PVX_000830 | 0.036687443 | 0             | 1.407871813  |
| PVX_000835 | 0.166224591 | 0             | 0.625055062  |
| PVX_000840 | 0.078805602 | 0             | 0.690649668  |
| PVX_000845 | 0.359317338 | 0             | 0.566468337  |
| PVX_000850 | 0.016473156 | 0             | 1.61743597   |
| PVX_000855 | 0.359317338 | 0             | 0.180323649  |
| PVX_000860 | 0.359317338 | 0             | 0.136841558  |

| GeneID     | Pvalue      | BackGroundPre | BackGroundDx |
|------------|-------------|---------------|--------------|
| PVX_000865 | 1           | 0             | 0            |
| PVX_000870 | 0.078805602 | 0             | 0.934266053  |
| PVX_000875 | 1           | 0             | 0            |
| PVX_000880 | 0.007054102 | 0             | 1.951513464  |
| PVX_000885 | 0.001084333 | 0             | 3.081489466  |
| PVX_000890 | 0.001084333 | 0             | 3.03823361   |
| PVX_000895 | 0.016473156 | 0             | 1.633816426  |
| PVX_000900 | 0.166224591 | 0             | 0.506579383  |
| PVX_000905 | 0.036687443 | 0             | 1.623083508  |
| PVX_000910 | 0.359317338 | 0             | 0.230994355  |
| PVX_000915 | 0.166224591 | 0             | 0.916741746  |
| PVX_000920 | 0.016473156 | 0             | 1.584997651  |
| PVX_000925 | 0.001084333 | 0             | 3.287774609  |
| PVX_000930 | 0.078805602 | 0             | 0.974232461  |
| PVX_000935 | 0.000125309 | 0             | 4.084212927  |
| PVX_000940 | 0.001084333 | 0             | 2.865565577  |
| PVX_000945 | 0.359317338 | 0             | 0.409487725  |
| PVX_000950 | 0.007054102 | 0             | 2.289529178  |
| PVX_000955 | 3.76E-05    | 0             | 3.375892491  |
| PVX_000960 | 0.036687443 | 0             | 1.642497961  |
| PVX_000965 | 0.016473156 | 0             | 1.772665011  |
| PVX_000970 | 0.000125309 | 0             | 3.03566976   |
| PVX_000975 | 0.007054102 | 0             | 1.385783531  |
| PVX_000980 | 1           | 0             | 0            |
| PVX_000985 | 3.76E-05    | 0             | 3.5168559    |
| PVX_000990 | 0.007054102 | 0             | 2.065979027  |
| PVX_000995 | 1           | 0             | 0            |
| PVX_001000 | 0.359317338 | 0             | 0.198877962  |
| PVX_001005 | 0.359317338 | 0             | 0.223460687  |
| PVX_001010 | 1           | 0             | 0            |
| PVX_001015 | 1           | 0             | 0            |
| PVX_001020 | 1           | 0             | 0            |
| PVX_001025 | 1           | 0             | 0            |
| PVX_001030 | 0.001084333 | 0             | 2.931884889  |
| PVX_001035 | 0.016473156 | 0             | 2.001428538  |
| PVX_001040 | 0.359317338 | 0             | 0.082987674  |
| PVX_001045 | 0.359317338 | 0             | 0.364136054  |
| PVX_001050 | 0.016473156 | 0             | 1.172973129  |
| PVX_001055 | 0.166224591 | 0             | 0.537040276  |
| PVX_001060 | 0.016473156 | 0             | 1.601557769  |
| PVX_001065 | 0.166224591 | 0             | 0.664627823  |

| GeneID     | Pvalue      | BackGroundPre | BackGroundDx |
|------------|-------------|---------------|--------------|
| PVX_001070 | 1           | 0             | 0            |
| PVX_001075 | 1           | 0             | 0            |
| PVX_001080 | 0.016473156 | 0             | 0.920696511  |
| PVX_001085 | 0.166224591 | 0             | 0.813128636  |
| PVX_001090 | 0.007054102 | 0             | 1.866470814  |
| PVX_001095 | 0.036687443 | 0             | 1.286330259  |
| PVX_001097 | 1           | 0             | 0            |
| PVX_001100 | 1           | 0             | 0            |
| PVX_001105 | 0.166224591 | 0             | 0.536625831  |
| PVX_001110 | 1           | 0             | 0            |
| PVX_001610 | 0.359317338 | 0             | 0.247467845  |
| PVX_001615 | 1           | 0             | 0            |
| PVX_001620 | 1           | 0             | 0            |
| PVX_001625 | 0.359317338 | 0             | 0.231567237  |
| PVX_001630 | 0.166224591 | 0             | 0.506201227  |
| PVX_001635 | 0.359317338 | 0             | 0.198626719  |
| PVX_001640 | 0.359317338 | 0             | 0.259105897  |
| PVX_001645 | 0.078805602 | 0             | 0.732620485  |
| PVX_001650 | 0.000383392 | 0             | 3.201706754  |
| PVX_001655 | 0.166224591 | 0             | 0.777726414  |
| PVX_001660 | 0.359317338 | 0             | 0.456749419  |
| PVX_001670 | 1.03E-05    | 0             | 5.807207768  |
| PVX_001675 | 0.359317338 | 0             | 0.262984373  |
| PVX_001680 | 1           | 0             | 0            |
| PVX_001685 | 1.03E-05    | 0             | 5.424831532  |
| PVX_001690 | 0.359317338 | 0             | 0.364811559  |
| PVX_001695 | 1           | 0             | 0            |
| PVX_001700 | 0.359317338 | 0             | 0.303063731  |
| PVX_001705 | 0.166224591 | 0             | 0.542117658  |
| PVX_001710 | 0.016473156 | 0             | 2.038998749  |
| PVX_001715 | 1           | 0             | 0            |
| PVX_001720 | 0.001084333 | 0             | 2.804385019  |
| PVX_001725 | 0.359317338 | 0             | 0.279711224  |
| PVX_001730 | 0.166224591 | 0             | 0.684937561  |
| PVX_001735 | 0.036687443 | 0             | 1.358145877  |
| PVX_001740 | 0.359317338 | 0             | 0.294182618  |
| PVX_001745 | 0.359317338 | 0             | 0.49032351   |
| PVX_001750 | 0.001084333 | 0             | 2.911718697  |
| PVX_001752 | 1           | 0             | 0            |
| PVX_001755 | 0.007054102 | 0             | 1.606292267  |
| PVX_001760 | 0.001084333 | 0             | 3.0710045    |

| GeneID     | Pvalue      | BackGroundPre | BackGroundDx |
|------------|-------------|---------------|--------------|
| PVX_001765 | 0.166224591 | 0             | 0.655701136  |
| PVX_001770 | 0.166224591 | 0             | 0.893361333  |
| PVX_001775 | 0.016473156 | 0             | 1.100016013  |
| PVX_001780 | 0.002855585 | 0             | 2.3112826    |
| PVX_001782 | 0.359317338 | 0             | 0.327105083  |
| PVX_001783 | 0.166224591 | 0             | 0.828369528  |
| PVX_001785 | 1           | 0             | 0            |
| PVX_001790 | 0.002855585 | 0             | 1.917767952  |
| PVX_001795 | 0.078805602 | 0             | 1.00629624   |
| PVX_001800 | 0.078805602 | 0             | 0.95992301   |
| PVX_001805 | 0.001084333 | 0             | 2.433030086  |
| PVX_001810 | 0.000125309 | 0             | 2.64748398   |
| PVX_001820 | 0.166224591 | 0             | 0.520189908  |
| PVX_001825 | 1           | 0             | 0            |
| PVX_001830 | 1           | 0             | 0            |
| PVX_001835 | 0.001084333 | 0             | 4.246726787  |
| PVX_001840 | 0.078805602 | 0             | 0.70332244   |
| PVX_001845 | 0.001084333 | 0             | 2.458048409  |
| PVX_001850 | 0.036687443 | 0             | 1.230729728  |
| PVX_001855 | 0.166224591 | 0             | 0.550635031  |
| PVX_001860 | 0.166224591 | 0             | 0.950060272  |
| PVX_001865 | 0.002855585 | 0             | 2.439709902  |
| PVX_001868 | 1           | 0             | 0            |
| PVX_001872 | 0.359317338 | 0             | 0.218127876  |
| PVX_001875 | 1           | 0             | 0            |
| PVX_001880 | 0.000383392 | 0             | 3.569322137  |
| PVX_001885 | 0.036687443 | 0             | 1.378054477  |
| PVX_001890 | 0.016473156 | 0             | 1.336708707  |
| PVX_001895 | 0.016473156 | 0             | 1.29818783   |
| PVX_001900 | 1           | 0             | 0            |
| PVX_001905 | 0.016473156 | 0             | 2.51314681   |
| PVX_001910 | 0.166224591 | 0             | 0.839012603  |
| PVX_001920 | 0.001084333 | 0             | 2.519237181  |
| PVX_001925 | 0.078805602 | 0             | 1.033402563  |
| PVX_001930 | 0.002855585 | 0             | 2.351644819  |
| PVX_001935 | 0.002855585 | 0             | 2.422402832  |
| PVX_001940 | 0.007054102 | 0             | 2.571659516  |
| PVX_001945 | 0.000383392 | 0             | 4.133366376  |
| PVX_001950 | 0.002855585 | 0             | 1.32002964   |
| PVX_001955 | 0.007054102 | 0             | 1.541598346  |
| PVX_001960 | 0.016473156 | 0             | 1.464398458  |

| GeneID     | Pvalue      | BackGroundPre | BackGroundDx |
|------------|-------------|---------------|--------------|
| PVX_001965 | 0.007054102 | 0             | 1.527515469  |
| PVX_001970 | 0.002855585 | 0             | 3.031238966  |
| PVX_001975 | 0.002855585 | 0             | 2.309797594  |
| PVX_001980 | 0.359317338 | 0             | 0.427124381  |
| PVX_002480 | 1           | 0             | 0            |
| PVX_002485 | 0.002855585 | 0             | 2.833464835  |
| PVX_002490 | 0.359317338 | 0             | 0.249466249  |
| PVX_002495 | 1           | 0             | 0            |
| PVX_002500 | 1           | 0             | 0            |
| PVX_002505 | 0.166224591 | 0             | 0.530101828  |
| PVX_002507 | 0.359317338 | 0             | 0.310636143  |
| PVX_002510 | 1           | 0             | 0            |
| PVX_002512 | 0.078805602 | 0             | 1.045816278  |
| PVX_002515 | 0.166224591 | 0             | 0.584760488  |
| PVX_002520 | 1           | 0             | 0            |
| PVX_002525 | 0.359317338 | 0             | 0.28706636   |
| PVX_002530 | 0.166224591 | 0             | 0.669515137  |
| PVX_002535 | 0.016473156 | 0             | 1.915632873  |
| PVX_002550 | 0.000125309 | 0             | 2.800561999  |
| PVX_002555 | 0.000383392 | 0             | 3.752641226  |
| PVX_002560 | 1           | 0             | 0            |
| PVX_002565 | 0.359317338 | 0             | 0.274354699  |
| PVX_002570 | 0.359317338 | 0             | 0.394602024  |
| PVX_002575 | 0.000125309 | 0             | 3.588020519  |
| PVX_002580 | 0.007054102 | 0             | 2.313436078  |
| PVX_002585 | 0.016473156 | 0             | 2.050196508  |
| PVX_002590 | 3.76E-05    | 0             | 6.631237075  |
| PVX_002595 | 0.078805602 | 0             | 1.252808489  |
| PVX_002600 | 0.078805602 | 0             | 0.824040619  |
| PVX_002605 | 0.007054102 | 0             | 2.131599564  |
| PVX_002610 | 0.002855585 | 0             | 1.593964475  |
| PVX_002615 | 0.007054102 | 0             | 2.595036038  |
| PVX_002620 | 0.078805602 | 0             | 0.936912375  |
| PVX_002625 | 0.078805602 | 0             | 1.173646589  |
| PVX_002630 | 0.007054102 | 0             | 1.461895287  |
| PVX_002635 | 1           | 0             | 0            |
| PVX_002640 | 0.036687443 | 0             | 1.428677241  |
| PVX_002645 | 0.002855585 | 0             | 2.62069355   |
| PVX_002650 | 0.001084333 | 0             | 4.341538646  |
| PVX_002655 | 0.078805602 | 0             | 0.936574344  |
| PVX_002660 | 0.016473156 | 0             | 1.306254805  |

| GeneID     | Pvalue      | BackGroundPre | BackGroundDx |
|------------|-------------|---------------|--------------|
| PVX_002665 | 0.007054102 | 0             | 2.047912335  |
| PVX_002670 | 0.007054102 | 0             | 2.518231528  |
| PVX_002675 | 0.078805602 | 0             | 1.368567112  |
| PVX_002680 | 0.002855585 | 0             | 1.941998869  |
| PVX_002685 | 0.000383392 | 0             | 3.676689764  |
| PVX_002690 | 0.166224591 | 0             | 0.427209308  |
| PVX_002695 | 0.359317338 | 0             | 0.267771674  |
| PVX_002700 | 0.166224591 | 0             | 0.399000705  |
| PVX_002705 | 0.166224591 | 0             | 0.407801061  |
| PVX_002710 | 0.002855585 | 0             | 2.371898744  |
| PVX_002715 | 0.036687443 | 0             | 1.050334332  |
| PVX_002720 | 0.000383392 | 0             | 3.311729345  |
| PVX_002725 | 0.016473156 | 0             | 1.334625388  |
| PVX_002730 | 0.166224591 | 0             | 0.682171297  |
| PVX_002735 | 0.016473156 | 0             | 1.433249709  |
| PVX_002740 | 0.166224591 | 0             | 0.505839964  |
| PVX_002745 | 1           | 0             | 0            |
| PVX_002750 | 0.359317338 | 0             | 0.266214919  |
| PVX_002755 | 0.000125309 | 0             | 2.913164046  |
| PVX_002760 | 0.002855585 | 0             | 2.864633612  |
| PVX_002765 | 0.002855585 | 0             | 2.314273898  |
| PVX_002770 | 0.016473156 | 0             | 1.53727639   |
| PVX_002775 | 0.166224591 | 0             | 0.76880267   |
| PVX_002780 | 0.359317338 | 0             | 0.323401599  |
| PVX_002785 | 0.007054102 | 0             | 2.157416187  |
| PVX_002790 | 1           | 0             | 0            |
| PVX_002795 | 0.016473156 | 0             | 1.19643834   |
| PVX_002800 | 1           | 0             | 0            |
| PVX_002805 | 0.078805602 | 0             | 0.602858963  |
| PVX_002810 | 0.078805602 | 0             | 1.191899612  |
| PVX_002815 | 0.002855585 | 0             | 2.325683266  |
| PVX_002820 | 0.078805602 | 0             | 0.632388935  |
| PVX_002825 | 0.078805602 | 0             | 1.018538364  |
| PVX_002830 | 0.000383392 | 0             | 2.9365274    |
| PVX_002835 | 3.76E-05    | 0             | 4.692872299  |
| PVX_002840 | 0.007054102 | 0             | 1.685187697  |
| PVX_002845 | 0.002855585 | 0             | 2.217605118  |
| PVX_002850 | 0.359317338 | 0             | 0.490707044  |
| PVX_002855 | 0.078805602 | 0             | 0.459307018  |
| PVX_002860 | 0.016473156 | 0             | 1.766932505  |
| PVX_002865 | 0.036687443 | 0             | 1.28472965   |

| GeneID     | Pvalue      | BackGroundPre | BackGroundDx |
|------------|-------------|---------------|--------------|
| PVX_002867 | 0.078805602 | 0             | 1.960409     |
| PVX_002870 | 0.166224591 | 0             | 0.935044547  |
| PVX_002875 | 0.078805602 | 0             | 1.059050156  |
| PVX_002880 | 0.016473156 | 0             | 1.94053151   |
| PVX_002885 | 0.078805602 | 0             | 1.036567635  |
| PVX_002890 | 0.002855585 | 0             | 2.274844383  |
| PVX_002895 | 0.007054102 | 0             | 1.981225959  |
| PVX_002900 | 0.078805602 | 0             | 1.196604876  |
| PVX_002905 | 0.000125309 | 0             | 2.232877791  |
| PVX_002910 | 0.000125309 | 0             | 2.426321618  |
| PVX_002915 | 0.000383392 | 0             | 3.776976008  |
| PVX_002920 | 0.007054102 | 0             | 2.236457098  |
| PVX_002925 | 0.016473156 | 0             | 1.149719569  |
| PVX_002930 | 0.007054102 | 0             | 2.239048188  |
| PVX_002935 | 0.001084333 | 0             | 3.118781553  |
| PVX_002940 | 0.000125309 | 0             | 4.342541448  |
| PVX_002945 | 0.036687443 | 0             | 1.104423791  |
| PVX_002950 | 0.166224591 | 0             | 0.758541115  |
| PVX_002955 | 0.166224591 | 0             | 0.371053366  |
| PVX_002960 | 1           | 0             | 0            |
| PVX_002965 | 0.016473156 | 0             | 1.597851733  |
| PVX_002970 | 0.007054102 | 0             | 2.332099956  |
| PVX_002975 | 0.001084333 | 0             | 2.326337237  |
| PVX_003475 | 0.166224591 | 0             | 0.418825877  |
| PVX_003485 | 0.166224591 | 0             | 0.739271502  |
| PVX_003487 | 0.166224591 | 0             | 0.808761653  |
| PVX_003490 | 0.359317338 | 0             | 0.276747518  |
| PVX_003495 | 1           | 0             | 0            |
| PVX_003500 | 1           | 0             | 0            |
| PVX_003505 | 0.166224591 | 0             | 0.498609044  |
| PVX_003510 | 1           | 0             | 0            |
| PVX_003515 | 0.359317338 | 0             | 0.335346659  |
| PVX_003520 | 1           | 0             | 0            |
| PVX_003525 | 0.166224591 | 0             | 0.386370804  |
| PVX_003530 | 0.166224591 | 0             | 0.686742082  |
| PVX_003535 | 0.359317338 | 0             | 0.226758718  |
| PVX_003540 | 0.078805602 | 0             | 0.846059592  |
| PVX_003545 | 0.000125309 | 0             | 4.546495652  |
| PVX_003550 | 1           | 0             | 0            |
| PVX_003555 | 0.000125309 | 0             | 3.546557361  |
| PVX_003560 | 0.007054102 | 0             | 2.146813364  |



| GeneID     | Pvalue      | BackGroundPre | BackGroundDx |
|------------|-------------|---------------|--------------|
| PVX_003565 | 0.000383392 | 0             | 5.558524141  |
| PVX_003570 | 0.007054102 | 0             | 1.639115368  |
| PVX_003575 | 1           | 0             | 0            |
| PVX_003578 | 0.359317338 | 0             | 0.619167775  |
| PVX_003580 | 0.359317338 | 0             | 0.409657691  |
| PVX_003585 | 0.036687443 | 0             | 1.0828871    |
| PVX_003590 | 0.359317338 | 0             | 0.14346278   |
| PVX_003595 | 0.002855585 | 0             | 2.413024667  |
| PVX_003600 | 0.036687443 | 0             | 1.779524928  |
| PVX_003605 | 0.166224591 | 0             | 0.916440339  |
| PVX_003607 | 1           | 0             | 0            |
| PVX_003610 | 0.078805602 | 0             | 0.937863189  |
| PVX_003615 | 0.002855585 | 0             | 2.319180976  |
| PVX_003620 | 0.001084333 | 0             | 2.86253032   |
| PVX_003625 | 1           | 0             | 0            |
| PVX_003630 | 0.166224591 | 0             | 0.492021246  |
| PVX_003635 | 0.359317338 | 0             | 0.215204729  |
| PVX_003640 | 0.036687443 | 0             | 1.508668952  |
| PVX_003645 | 1           | 0             | 0            |
| PVX_003650 | 1           | 0             | 0            |
| PVX_003655 | 0.078805602 | 0             | 0.990678814  |
| PVX_003660 | 0.166224591 | 0             | 0.452894225  |
| PVX_003665 | 0.007054102 | 0             | 2.186178358  |
| PVX_003670 | 0.359317338 | 0             | 0.284591691  |
| PVX_003675 | 0.166224591 | 0             | 0.663364658  |
| PVX_003680 | 0.078805602 | 0             | 0.72031923   |
| PVX_003685 | 0.166224591 | 0             | 0.553227682  |
| PVX_003690 | 1           | 0             | 0            |
| PVX_003695 | 0.166224591 | 0             | 0.464623807  |
| PVX_003700 | 0.000383392 | 0             | 3.282124907  |
| PVX_003705 | 0.078805602 | 0             | 1.536665267  |
| PVX_003710 | 0.166224591 | 0             | 1.049353907  |
| PVX_003715 | 0.016473156 | 0             | 1.558629878  |
| PVX_003720 | 0.002855585 | 0             | 2.68827295   |
| PVX_003725 | 0.166224591 | 0             | 0.913020812  |
| PVX_003730 | 3.76E-05    | 0             | 4.179871532  |
| PVX_003735 | 0.016473156 | 0             | 1.120960917  |
| PVX_003740 | 0.166224591 | 0             | 0.690372942  |
| PVX_003745 | 1           | 0             | 0            |
| PVX_003750 | 0.001084333 | 0             | 1.99298824   |
| PVX_003755 | 0.007054102 | 0             | 1.794410621  |

| GeneID     | Pvalue      | BackGroundPre | BackGroundDx |
|------------|-------------|---------------|--------------|
| PVX_003760 | 0.359317338 | 0             | 0.628893839  |
| PVX_003765 | 0.016473156 | 0             | 1.766509576  |
| PVX_003770 | 0.359317338 | 0             | 0.299325261  |
| PVX_003775 | 1           | 0             | 0            |
| PVX_003780 | 0.001084333 | 0             | 1.905551121  |
| PVX_003785 | 0.359317338 | 0             | 0.488643743  |
| PVX_003790 | 1           | 0             | 0            |
| PVX_003795 | 1           | 0             | 0            |
| PVX_003800 | 0.007054102 | 0             | 1.61992831   |
| PVX_003805 | 0.359317338 | 0             | 0.204026705  |
| PVX_003810 | 0.359317338 | 0             | 0.350093881  |
| PVX_003815 | 1           | 0             | 0            |
| PVX_003820 | 0.359317338 | 0             | 0.283936591  |
| PVX_003825 | 0.359317338 | 0             | 0.290682605  |
| PVX_003830 | 1           | 0             | 0            |
| PVX_003835 | 0.166224591 | 0             | 0.495035633  |
| PVX_003840 | 0.166224591 | 0             | 0.418308469  |
| PVX_003845 | 0.036687443 | 0             | 1.100175036  |
| PVX_003850 | 1           | 0             | 0            |
| PVX_003855 | 0.007054102 | 0             | 1.598568276  |
| PVX_003860 | 0.007054102 | 0             | 2.691173776  |
| PVX_003865 | 0.002855585 | 0             | 1.918904327  |
| PVX_003870 | 0.002855585 | 0             | 1.702644164  |
| PVX_003875 | 1           | 0             | 0            |
| PVX_003880 | 0.016473156 | 0             | 2.203716104  |
| PVX_003885 | 0.016473156 | 0             | 1.732249338  |
| PVX_003890 | 0.036687443 | 0             | 1.448734339  |
| PVX_003895 | 0.166224591 | 0             | 0.807662344  |
| PVX_003900 | 0.036687443 | 0             | 0.876582284  |
| PVX_003905 | 0.078805602 | 0             | 0.486131087  |
| PVX_003910 | 0.078805602 | 0             | 0.984310098  |
| PVX_003915 | 0.002855585 | 0             | 2.894106571  |
| PVX_003920 | 0.078805602 | 0             | 1.078417745  |
| PVX_003925 | 0.016473156 | 0             | 2.004823365  |
| PVX_003930 | 1           | 0             | 0            |
| PVX_003935 | 0.359317338 | 0             | 0.209816104  |
| PVX_003940 | 0.007054102 | 0             | 1.948826373  |
| PVX_003945 | 1.03E-05    | 0             | 5.86393157   |
| PVX_003950 | 0.016473156 | 0             | 2.779847523  |
| PVX_003955 | 0.000383392 | 0             | 5.892066795  |
| PVX_003960 | 0.001084333 | 0             | 2.088573948  |

| GeneID     | Pvalue      | BackGroundPre | BackGroundDx |
|------------|-------------|---------------|--------------|
| PVX_003965 | 0.016473156 | 0             | 1.807099076  |
| PVX_003970 | 0.166224591 | 0             | 0.951140284  |
| PVX_003975 | 0.016473156 | 0             | 1.322006125  |
| PVX_003980 | 0.359317338 | 0             | 0.234403546  |
| PVX_003985 | 0.007054102 | 0             | 1.675837752  |
| PVX_003990 | 0.359317338 | 0             | 0.351924615  |
| PVX_003995 | 0.016473156 | 0             | 2.098581729  |
| PVX_004495 | 1           | 0             | 0            |
| PVX_004503 | 0.359317338 | 0             | 0.177897386  |
| PVX_004505 | 1           | 0             | 0            |
| PVX_004510 | 0.359317338 | 0             | 0.290507743  |
| PVX_004515 | 0.036687443 | 0             | 1.643166798  |
| PVX_004520 | 0.078805602 | 0             | 1.213792969  |
| PVX_004525 | 0.359317338 | 0             | 0.302264521  |
| PVX_004530 | 0.359317338 | 0             | 0.281696818  |
| PVX_004535 | 0.016473156 | 0             | 1.893706874  |
| PVX_004536 | 1           | 0             | 0            |
| PVX_004537 | 0.359317338 | 0             | 0.264114901  |
| PVX_004539 | 0.007054102 | 0             | 2.294521793  |
| PVX_005040 | 0.166224591 | 0             | 0.528431114  |
| PVX_005045 | 0.359317338 | 0             | 0.211537285  |
| PVX_005050 | 1           | 0             | 0            |
| PVX_005055 | 0.166224591 | 0             | 0.506547903  |
| PVX_005057 | 0.078805602 | 0             | 1.099942623  |
| PVX_005058 | 0.359317338 | 0             | 0.293178709  |
| PVX_005060 | 0.359317338 | 0             | 0.43907233   |
| PVX_005065 | 1           | 0             | 0            |
| PVX_005565 | 1           | 0             | 0            |
| PVX_005570 | 1           | 0             | 0            |
| PVX_005575 | 1           | 0             | 0            |
| PVX_005580 | 1           | 0             | 0            |
| PVX_006080 | 0.359317338 | 0             | 0.21138707   |
| PVX_006580 | 1           | 0             | 0            |
| PVX_007080 | 1           | 0             | 0            |
| PVX_007085 | 1           | 0             | 0            |
| PVX_007585 | 1           | 0             | 0            |
| PVX_008085 | 0.002855585 | 0             | 2.811320813  |
| PVX_009090 | 1           | 0             | 0            |
| PVX_009590 | 1           | 0             | 0            |
| PVX_009595 | 1           | 0             | 0            |
| PVX_009600 | 1           | 0             | 0            |

| GeneID     | Pvalue      | BackGroundPre | BackGroundDx |
|------------|-------------|---------------|--------------|
| PVX_010100 | 1           | 0             | 0            |
| PVX_010105 | 1           | 0             | 0            |
| PVX_010605 | 1           | 0             | 0            |
| PVX_010610 | 1           | 0             | 0            |
| PVX_011110 | 1           | 0             | 0            |
| PVX_011610 | 1           | 0             | 0            |
| PVX_011615 | 1           | 0             | 0            |
| PVX_012115 | 0.166224591 | 0             | 0.537441518  |
| PVX_013120 | 1           | 0             | 0            |
| PVX_013620 | 0.166224591 | 0             | 0.535436804  |
| PVX_013625 | 0.359317338 | 0             | 0.249462909  |
| PVX_014125 | 1           | 0             | 0            |
| PVX_014625 | 1           | 0             | 0            |
| PVX_014630 | 1           | 0             | 0            |
| PVX_015130 | 1           | 0             | 0            |
| PVX_015135 | 1           | 0             | 0            |
| PVX_015635 | 1           | 0             | 0            |
| PVX_015640 | 1           | 0             | 0            |
| PVX_016140 | 1           | 0             | 0            |
| PVX_016640 | 1           | 0             | 0            |
| PVX_017140 | 1           | 0             | 0            |
| PVX_017145 | 1           | 0             | 0            |
| PVX_017645 | 0.359317338 | 0             | 0.348072528  |
| PVX_017650 | 1           | 0             | 0            |
| PVX_018150 | 1           | 0             | 0            |
| PVX_018155 | 1           | 0             | 0            |
| PVX_018655 | 1           | 0             | 0            |
| PVX_018660 | 1           | 0             | 0            |
| PVX_019160 | 1           | 0             | 0            |
| PVX_019165 | 0.166224591 | 0             | 0.762799929  |
| PVX_019665 | 1           | 0             | 0            |
| PVX_019670 | 1           | 0             | 0            |
| PVX_020170 | 1           | 0             | 0            |
| PVX_020175 | 1           | 0             | 0            |
| PVX_020675 | 1           | 0             | 0            |
| PVX_020680 | 0.359317338 | 0             | 0.310477665  |
| PVX_021180 | 1           | 0             | 0            |
| PVX_021680 | 1           | 0             | 0            |
| PVX_021685 | 1           | 0             | 0            |
| PVX_022185 | 0.002855585 | 0             | 2.614673855  |
| PVX_022685 | 0.016473156 | 0             | 1.641213015  |

| GeneID     | Pvalue      | BackGroundPre | BackGroundDx |
|------------|-------------|---------------|--------------|
| PVX_023185 | 1           | 0             | 0            |
| PVX_023685 | 1           | 0             | 0            |
| PVX_024185 | 1           | 0             | 0            |
| PVX_024685 | 0.036687443 | 0             | 1.356484351  |
| PVX_024690 | 1           | 0             | 0            |
| PVX_025190 | 0.359317338 | 0             | 0.544797456  |
| PVX_025690 | 1           | 0             | 0            |
| PVX_026190 | 1           | 0             | 0            |
| PVX_026690 | 1           | 0             | 0            |
| PVX_027190 | 1           | 0             | 0            |
| PVX_027690 | 1           | 0             | 0            |
| PVX_028190 | 1           | 0             | 0            |
| PVX_028690 | 1           | 0             | 0            |
| PVX_029190 | 1           | 0             | 0            |
| PVX_029690 | 1           | 0             | 0            |
| PVX_030190 | 1           | 0             | 0            |
| PVX_030690 | 1           | 0             | 0            |
| PVX_031190 | 1           | 0             | 0            |
| PVX_031690 | 1           | 0             | 0            |
| PVX_032190 | 0.359317338 | 0             | 0.256274316  |
| PVX_032690 | 1           | 0             | 0            |
| PVX_033190 | 1           | 0             | 0            |
| PVX_033690 | 1           | 0             | 0            |
| PVX_034190 | 1           | 0             | 0            |
| PVX_034690 | 0.359317338 | 0             | 0.243629498  |
| PVX_035190 | 1           | 0             | 0            |
| PVX_035690 | 1           | 0             | 0            |
| PVX_036190 | 1           | 0             | 0            |
| PVX_036690 | 0.359317338 | 0             | 0.539247739  |
| PVX_037190 | 1           | 0             | 0            |
| PVX_037690 | 1           | 0             | 0            |
| PVX_038190 | 1           | 0             | 0            |
| PVX_038690 | 1           | 0             | 0            |
| PVX_039190 | 1           | 0             | 0            |
| PVX_039690 | 1           | 0             | 0            |
| PVX_040190 | 1           | 0             | 0            |
| PVX_040690 | 1           | 0             | 0            |
| PVX_041190 | 1           | 0             | 0            |
| PVX_041690 | 1           | 0             | 0            |
| PVX_042190 | 1           | 0             | 0            |
| PVX_042690 | 1           | 0             | 0            |

| GeneID     | Pvalue      | BackGroundPre | BackGroundDx |
|------------|-------------|---------------|--------------|
| PVX_043190 | 0.078805602 | 0             | 0.897968983  |
| PVX_043690 | 1           | 0             | 0            |
| PVX_044190 | 1           | 0             | 0            |
| PVX_044690 | 1           | 0             | 0            |
| PVX_045190 | 0.359317338 | 0             | 0.380681442  |
| PVX_045690 | 1           | 0             | 0            |
| PVX_046190 | 1           | 0             | 0            |
| PVX_046690 | 1           | 0             | 0            |
| PVX_047190 | 1           | 0             | 0            |
| PVX_047690 | 1           | 0             | 0            |
| PVX_048190 | 1           | 0             | 0            |
| PVX_048690 | 1           | 0             | 0            |
| PVX_049190 | 1           | 0             | 0            |
| PVX_049690 | 0.078805602 | 0             | 0.92752964   |
| PVX_050190 | 0.359317338 | 0             | 0.306034978  |
| PVX_050690 | 1           | 0             | 0            |
| PVX_051190 | 1           | 0             | 0            |
| PVX_051690 | 1           | 0             | 0            |
| PVX_052190 | 1           | 0             | 0            |
| PVX_052690 | 0.359317338 | 0             | 0.280420131  |
| PVX_053190 | 1           | 0             | 0            |
| PVX_053690 | 1           | 0             | 0            |
| PVX_054190 | 0.359317338 | 0             | 0.297078727  |
| PVX_054690 | 1           | 0             | 0            |
| PVX_055190 | 1           | 0             | 0            |
| PVX_055690 | 0.359317338 | 0             | 0.369395293  |
| PVX_056190 | 0.166224591 | 0             | 0.718797797  |
| PVX_056690 | 1           | 0             | 0            |
| PVX_057190 | 1           | 0             | 0            |
| PVX_057690 | 1           | 0             | 0            |
| PVX_058190 | 1           | 0             | 0            |
| PVX_058690 | 1           | 0             | 0            |
| PVX_059190 | 1           | 0             | 0            |
| PVX_059690 | 1           | 0             | 0            |
| PVX_060190 | 1           | 0             | 0            |
| PVX_060690 | 1           | 0             | 0            |
| PVX_061190 | 0.359317338 | 0             | 0.305443043  |
| PVX_061690 | 1           | 0             | 0            |
| PVX_062190 | 1           | 0             | 0            |
| PVX_062690 | 0.016473156 | 0             | 1.474950508  |
| PVX_063190 | 1           | 0             | 0            |

| GeneID     | Pvalue      | BackGroundPre | BackGroundDx |
|------------|-------------|---------------|--------------|
| PVX_063690 | 1           | 0             | 0            |
| PVX_064190 | 1           | 0             | 0            |
| PVX_064690 | 1           | 0             | 0            |
| PVX_065190 | 1           | 0             | 0            |
| PVX_065690 | 0.078805602 | 0             | 1.06188046   |
| PVX_066190 | 0.166224591 | 0             | 0.619258907  |
| PVX_066690 | 1           | 0             | 0            |
| PVX_067190 | 1           | 0             | 0            |
| PVX_067690 | 1           | 0             | 0            |
| PVX_068190 | 1           | 0             | 0            |
| PVX_068690 | 1           | 0             | 0            |
| PVX_069190 | 1           | 0             | 0            |
| PVX_069690 | 1           | 0             | 0            |
| PVX_070190 | 1           | 0             | 0            |
| PVX_070690 | 1           | 0             | 0            |
| PVX_071190 | 1           | 0             | 0            |
| PVX_071690 | 1           | 0             | 0            |
| PVX_072190 | 0.359317338 | 0             | 0.305923501  |
| PVX_072690 | 1           | 0             | 0            |
| PVX_073190 | 0.359317338 | 0             | 0.32597808   |
| PVX_073690 | 0.078805602 | 0             | 0.909686845  |
| PVX_074190 | 1           | 0             | 0            |
| PVX_074690 | 0.166224591 | 0             | 0.517771658  |
| PVX_074695 | 1           | 0             | 0            |
| PVX_075195 | 1           | 0             | 0            |
| PVX_075695 | 1           | 0             | 0            |
| PVX_076195 | 0.359317338 | 0             | 0.332586304  |
| PVX_076695 | 1           | 0             | 0            |
| PVX_077195 | 1           | 0             | 0            |
| PVX_077695 | 0.016473156 | 0             | 1.203517715  |
| PVX_078195 | 1           | 0             | 0            |
| PVX_078695 | 1           | 0             | 0            |
| PVX_079195 | 0.359317338 | 0             | 0.275532978  |
| PVX_079695 | 0.001084333 | 0             | 2.284110308  |
| PVX_079700 | 0.166224591 | 0             | 0.523896244  |
| PVX_079705 | 0.036687443 | 0             | 1.49618259   |
| PVX_079710 | 1           | 0             | 0            |
| PVX_079715 | 0.016473156 | 0             | 1.327491685  |
| PVX_079720 | 0.166224591 | 0             | 0.502778104  |
| PVX_079725 | 0.166224591 | 0             | 0.754994975  |
| PVX_079730 | 0.016473156 | 0             | 1.346185769  |

| GeneID     | Pvalue      | BackGroundPre | BackGroundDx |
|------------|-------------|---------------|--------------|
| PVX_079735 | 0.166224591 | 0             | 0.601087519  |
| PVX_079740 | 1           | 0             | 0            |
| PVX_079745 | 0.078805602 | 0             | 0.75527417   |
| PVX_079750 | 0.078805602 | 0             | 0.776193126  |
| PVX_079755 | 0.016473156 | 0             | 1.748759389  |
| PVX_079760 | 0.078805602 | 0             | 1.125717502  |
| PVX_079765 | 0.007054102 | 0             | 2.487401054  |
| PVX_079770 | 0.036687443 | 0             | 1.600570318  |
| PVX_079772 | 0.359317338 | 0             | 0.123176197  |
| PVX_079775 | 0.036687443 | 0             | 1.014218453  |
| PVX_079778 | 1           | 0             | 0            |
| PVX_079780 | 0.036687443 | 0             | 1.724641632  |
| PVX_079785 | 0.007054102 | 0             | 1.413027725  |
| PVX_079790 | 1           | 0             | 0            |
| PVX_079795 | 0.078805602 | 0             | 1.177259411  |
| PVX_079800 | 0.036687443 | 0             | 1.406971593  |
| PVX_079805 | 1           | 0             | 0            |
| PVX_079810 | 0.002855585 | 0             | 2.334480438  |
| PVX_079815 | 0.036687443 | 0             | 1.162993452  |
| PVX_079820 | 0.078805602 | 0             | 0.954189571  |
| PVX_079825 | 1           | 0             | 0            |
| PVX_079830 | 1           | 0             | 0            |
| PVX_079835 | 1           | 0             | 0            |
| PVX_079840 | 0.001084333 | 0             | 3.431769044  |
| PVX_079845 | 0.002855585 | 0             | 2.302698036  |
| PVX_079850 | 0.002855585 | 0             | 3.07346689   |
| PVX_079855 | 0.001084333 | 0             | 2.386416595  |
| PVX_079857 | 1           | 0             | 0            |
| PVX_079858 | 1           | 0             | 0            |
| PVX_079860 | 1           | 0             | 0            |
| PVX_079865 | 0.000125309 | 0             | 4.463659174  |
| PVX_079870 | 0.078805602 | 0             | 1.377819259  |
| PVX_079875 | 0.078805602 | 0             | 1.232830999  |
| PVX_079880 | 0.002855585 | 0             | 2.369396062  |
| PVX_079885 | 0.002855585 | 0             | 3.02689952   |
| PVX_079890 | 0.016473156 | 0             | 1.451425994  |
| PVX_079895 | 0.078805602 | 0             | 1.073605765  |
| PVX_079900 | 0.036687443 | 0             | 1.493536005  |
| PVX_079905 | 0.001084333 | 0             | 2.999153357  |
| PVX_079910 | 0.002855585 | 0             | 1.194713703  |
| PVX_079915 | 1           | 0             | 0            |



| GeneID     | Pvalue      | BackGroundPre | BackGroundDx |
|------------|-------------|---------------|--------------|
| PVX_079920 | 0.016473156 | 0             | 1.599743715  |
| PVX_079925 | 0.001084333 | 0             | 2.931110175  |
| PVX_079930 | 0.001084333 | 0             | 2.959235501  |
| PVX_079935 | 0.078805602 | 0             | 0.952126839  |
| PVX_079940 | 0.007054102 | 0             | 2.155024082  |
| PVX_079945 | 0.016473156 | 0             | 1.527334571  |
| PVX_079950 | 1           | 0             | 0            |
| PVX_079955 | 0.359317338 | 0             | 0.272623938  |
| PVX_079960 | 0.036687443 | 0             | 1.504784404  |
| PVX_079965 | 0.359317338 | 0             | 0.305374759  |
| PVX_079970 | 0.007054102 | 0             | 1.537177952  |
| PVX_079975 | 0.036687443 | 0             | 1.291845305  |
| PVX_079980 | 0.078805602 | 0             | 1.069980917  |
| PVX_079985 | 0.016473156 | 0             | 1.119702853  |
| PVX_079990 | 0.000125309 | 0             | 3.739778411  |
| PVX_079995 | 0.359317338 | 0             | 0.157214127  |
| PVX_080000 | 0.016473156 | 0             | 1.645846007  |
| PVX_080005 | 0.036687443 | 0             | 1.508480349  |
| PVX_080010 | 0.016473156 | 0             | 1.428358395  |
| PVX_080015 | 0.016473156 | 0             | 2.194734068  |
| PVX_080020 | 0.078805602 | 0             | 1.231455496  |
| PVX_080025 | 0.166224591 | 0             | 0.931939402  |
| PVX_080030 | 0.016473156 | 0             | 1.43021336   |
| PVX_080035 | 0.002855585 | 0             | 2.593367135  |
| PVX_080040 | 1           | 0             | 0            |
| PVX_080045 | 0.016473156 | 0             | 1.38738484   |
| PVX_080050 | 1.03E-05    | 0             | 4.51881195   |
| PVX_080055 | 1           | 0             | 0            |
| PVX_080060 | 0.000383392 | 0             | 3.111868125  |
| PVX_080065 | 0.036687443 | 0             | 1.084102358  |
| PVX_080070 | 0.078805602 | 0             | 1.01926815   |
| PVX_080075 | 1           | 0             | 0            |
| PVX_080080 | 0.002855585 | 0             | 2.344064708  |
| PVX_080085 | 0.078805602 | 0             | 1.516022015  |
| PVX_080090 | 0.002855585 | 0             | 2.274387298  |
| PVX_080095 | 0.000383392 | 0             | 3.404880501  |
| PVX_080100 | 0.000125309 | 0             | 3.422766359  |
| PVX_080105 | 0.007054102 | 0             | 1.432094641  |
| PVX_080110 | 0.002855585 | 0             | 2.882823296  |
| PVX_080115 | 0.078805602 | 0             | 1.263815457  |
| PVX_080120 | 0.166224591 | 0             | 0.614286024  |

| GeneID     | Pvalue      | BackGroundPre | BackGroundDx |
|------------|-------------|---------------|--------------|
| PVX_080125 | 0.166224591 | 0             | 0.854070772  |
| PVX_080130 | 0.078805602 | 0             | 0.294280623  |
| PVX_080135 | 0.016473156 | 0             | 1.660652422  |
| PVX_080140 | 0.166224591 | 0             | 0.780284896  |
| PVX_080145 | 1           | 0             | 0            |
| PVX_080147 | 0.359317338 | 0             | 0.456705673  |
| PVX_080150 | 1           | 0             | 0            |
| PVX_080155 | 0.036687443 | 0             | 0.982333049  |
| PVX_080160 | 0.007054102 | 0             | 1.70963214   |
| PVX_080165 | 0.359317338 | 0             | 0.44604503   |
| PVX_080170 | 0.036687443 | 0             | 1.311952216  |
| PVX_080175 | 0.016473156 | 0             | 1.427692032  |
| PVX_080180 | 0.001084333 | 0             | 2.178613242  |
| PVX_080185 | 0.078805602 | 0             | 0.874477443  |
| PVX_080190 | 0.078805602 | 0             | 0.713240002  |
| PVX_080195 | 0.016473156 | 0             | 1.594184995  |
| PVX_080200 | 0.000125309 | 0             | 4.362282928  |
| PVX_080205 | 0.016473156 | 0             | 1.028545034  |
| PVX_080210 | 0.036687443 | 0             | 1.265504172  |
| PVX_080215 | 0.036687443 | 0             | 1.522360439  |
| PVX_080220 | 0.359317338 | 0             | 0.322098928  |
| PVX_080225 | 0.016473156 | 0             | 2.103051742  |
| PVX_080230 | 0.007054102 | 0             | 2.553097304  |
| PVX_080235 | 0.000383392 | 0             | 3.230036805  |
| PVX_080240 | 0.016473156 | 0             | 1.607605781  |
| PVX_080245 | 1.03E-05    | 0             | 6.832841883  |
| PVX_080250 | 0.078805602 | 0             | 1.132650219  |
| PVX_080255 | 0.007054102 | 0             | 1.693930198  |
| PVX_080260 | 0.000383392 | 0             | 4.444854351  |
| PVX_080265 | 0.002855585 | 0             | 2.588212802  |
| PVX_080270 | 0.166224591 | 0             | 0.42746136   |
| PVX_080275 | 1.03E-05    | 0             | 6.2481865    |
| PVX_080280 | 0.078805602 | 0             | 0.817030437  |
| PVX_080285 | 0.007054102 | 0             | 2.645317266  |
| PVX_080290 | 0.359317338 | 0             | 0.446320059  |
| PVX_080295 | 0.002855585 | 0             | 2.616995892  |
| PVX_080300 | 1           | 0             | 0            |
| PVX_080305 | 1           | 0             | 0            |
| PVX_080310 | 1           | 0             | 0            |
| PVX_080315 | 0.002855585 | 0             | 1.974659218  |
| PVX_080320 | 0.166224591 | 0             | 0.374086408  |

| GeneID     | Pvalue      | BackGroundPre | BackGroundDx |
|------------|-------------|---------------|--------------|
| PVX_080325 | 1           | 0             | 0            |
| PVX_080330 | 0.000125309 | 0             | 4.169135222  |
| PVX_080335 | 0.036687443 | 0             | 1.592317212  |
| PVX_080340 | 0.036687443 | 0             | 0.975072091  |
| PVX_080345 | 0.078805602 | 0             | 1.340694395  |
| PVX_080350 | 0.036687443 | 0             | 1.435256217  |
| PVX_080355 | 0.036687443 | 0             | 0.973512384  |
| PVX_080360 | 0.166224591 | 0             | 0.880783729  |
| PVX_080365 | 3.76E-05    | 0             | 4.865414286  |
| PVX_080370 | 1           | 0             | 0            |
| PVX_080375 | 0.359317338 | 0             | 0.226765847  |
| PVX_080380 | 0.001084333 | 0             | 2.476793251  |
| PVX_080385 | 0.007054102 | 0             | 2.458388929  |
| PVX_080390 | 0.166224591 | 0             | 0.581713584  |
| PVX_080395 | 0.166224591 | 0             | 0.731086902  |
| PVX_080400 | 1.03E-05    | 0             | 6.734039357  |
| PVX_080405 | 3.76E-05    | 0             | 5.682445558  |
| PVX_080410 | 0.036687443 | 0             | 0.875281964  |
| PVX_080415 | 0.000125309 | 0             | 3.2844556    |
| PVX_080420 | 0.001084333 | 0             | 2.263030638  |
| PVX_080425 | 1           | 0             | 0            |
| PVX_080430 | 0.002855585 | 0             | 2.801687455  |
| PVX_080435 | 0.016473156 | 0             | 1.603207854  |
| PVX_080440 | 0.000125309 | 0             | 5.321336516  |
| PVX_080445 | 0.016473156 | 0             | 1.087919852  |
| PVX_080450 | 0.000125309 | 0             | 3.857959207  |
| PVX_080455 | 0.078805602 | 0             | 1.762032973  |
| PVX_080460 | 0.078805602 | 0             | 0.902674871  |
| PVX_080465 | 0.166224591 | 0             | 0.409559045  |
| PVX_080470 | 1           | 0             | 0            |
| PVX_080475 | 1           | 0             | 0            |
| PVX_080480 | 0.016473156 | 0             | 1.34302353   |
| PVX_080485 | 0.036687443 | 0             | 1.680044343  |
| PVX_080490 | 1           | 0             | 0            |
| PVX_080495 | 0.016473156 | 0             | 1.54340628   |
| PVX_080500 | 0.007054102 | 0             | 2.042898957  |
| PVX_080505 | 0.016473156 | 0             | 1.278231216  |
| PVX_080510 | 0.166224591 | 0             | 0.478604826  |
| PVX_080515 | 0.036687443 | 0             | 1.73306935   |
| PVX_080520 | 1           | 0             | 0            |
| PVX_080523 | 1           | 0             | 0            |

| GeneID     | Pvalue      | BackGroundPre | BackGroundDx |
|------------|-------------|---------------|--------------|
| PVX_080525 | 0.001084333 | 0             | 2.693453536  |
| PVX_080530 | 0.078805602 | 0             | 0.792548423  |
| PVX_080535 | 0.078805602 | 0             | 0.942058487  |
| PVX_080540 | 0.166224591 | 0             | 0.730363957  |
| PVX_080545 | 0.016473156 | 0             | 1.933520472  |
| PVX_080550 | 0.016473156 | 0             | 2.238328255  |
| PVX_080555 | 0.359317338 | 0             | 0.224892785  |
| PVX_080560 | 0.007054102 | 0             | 1.533377619  |
| PVX_080565 | 0.078805602 | 0             | 1.415836508  |
| PVX_080570 | 0.359317338 | 0             | 0.277207051  |
| PVX_080575 | 1.03E-05    | 0             | 5.728578115  |
| PVX_080580 | 0.002855585 | 0             | 1.798310616  |
| PVX_080585 | 0.359317338 | 0             | 0.290652298  |
| PVX_080590 | 0.359317338 | 0             | 0.300986142  |
| PVX_080595 | 0.359317338 | 0             | 0.275057951  |
| PVX_080600 | 0.078805602 | 0             | 0.944606697  |
| PVX_080605 | 0.359317338 | 0             | 0.289368314  |
| PVX_080610 | 0.078805602 | 0             | 1.140174433  |
| PVX_080615 | 0.078805602 | 0             | 0.787711079  |
| PVX_080617 | 0.359317338 | 0             | 0.197383829  |
| PVX_080620 | 1           | 0             | 0            |
| PVX_080625 | 0.002855585 | 0             | 2.558782154  |
| PVX_080630 | 0.036687443 | 0             | 1.199145161  |
| PVX_080635 | 0.016473156 | 0             | 2.145938726  |
| PVX_080640 | 0.001084333 | 0             | 4.311211581  |
| PVX_080645 | 0.078805602 | 0             | 0.879028735  |
| PVX_080650 | 1.03E-05    | 0             | 6.324648175  |
| PVX_080655 | 0.036687443 | 0             | 1.643813966  |
| PVX_080657 | 0.359317338 | 0             | 0.372367561  |
| PVX_080660 | 0.000125309 | 0             | 2.090681456  |
| PVX_080665 | 0.166224591 | 0             | 0.643727351  |
| PVX_080670 | 0.166224591 | 0             | 0.407019965  |
| PVX_080675 | 0.001084333 | 0             | 2.562152784  |
| PVX_080680 | 0.166224591 | 0             | 0.581849506  |
| PVX_080685 | 0.000125309 | 0             | 4.482348433  |
| PVX_080690 | 1           | 0             | 0            |
| PVX_080700 | 1           | 0             | 0            |
| PVX_081200 | 1           | 0             | 0            |
| PVX_081205 | 0.016473156 | 0             | 1.813048794  |
| PVX_081210 | 0.078805602 | 0             | 1.293421265  |
| PVX_081215 | 0.001084333 | 0             | 2.803374827  |

| GeneID     | Pvalue      | BackGroundPre | BackGroundDx |
|------------|-------------|---------------|--------------|
| PVX_081220 | 0.036687443 | 0             | 1.984994095  |
| PVX_081225 | 0.007054102 | 0             | 2.414866202  |
| PVX_081230 | 0.036687443 | 0             | 1.28912221   |
| PVX_081235 | 0.016473156 | 0             | 1.528566435  |
| PVX_081240 | 0.007054102 | 0             | 1.806067279  |
| PVX_081245 | 0.036687443 | 0             | 1.639271232  |
| PVX_081250 | 0.359317338 | 0             | 0.1370304    |
| PVX_081255 | 0.016473156 | 0             | 2.03262134   |
| PVX_081260 | 0.036687443 | 0             | 1.491881371  |
| PVX_081265 | 0.000125309 | 0             | 4.706043621  |
| PVX_081270 | 0.002855585 | 0             | 1.993430257  |
| PVX_081275 | 0.016473156 | 0             | 1.129223372  |
| PVX_081277 | 0.001084333 | 0             | 3.294450784  |
| PVX_081280 | 0.078805602 | 0             | 1.420295216  |
| PVX_081285 | 0.002855585 | 0             | 2.302741753  |
| PVX_081290 | 0.166224591 | 0             | 0.788857287  |
| PVX_081295 | 0.359317338 | 0             | 0.275462707  |
| PVX_081300 | 0.001084333 | 0             | 3.250038937  |
| PVX_081305 | 0.036687443 | 0             | 1.760073275  |
| PVX_081307 | 0.078805602 | 0             | 1.353986706  |
| PVX_081310 | 0.016473156 | 0             | 2.377989441  |
| PVX_081315 | 0.166224591 | 0             | 0.855790763  |
| PVX_081320 | 0.002855585 | 0             | 2.951999599  |
| PVX_081325 | 0.002855585 | 0             | 3.01799745   |
| PVX_081330 | 0.166224591 | 0             | 0.492537977  |
| PVX_081335 | 0.359317338 | 0             | 0.45757729   |
| PVX_081340 | 0.016473156 | 0             | 1.76302025   |
| PVX_081345 | 0.166224591 | 0             | 0.473407476  |
| PVX_081350 | 0.016473156 | 0             | 2.072403031  |
| PVX_081355 | 0.016473156 | 0             | 2.179419955  |
| PVX_081360 | 0.359317338 | 0             | 0.393902512  |
| PVX_081365 | 1.03E-05    | 0             | 3.987626695  |
| PVX_081370 | 0.016473156 | 0             | 1.640189476  |
| PVX_081375 | 0.000383392 | 0             | 3.981060626  |
| PVX_081380 | 0.036687443 | 0             | 1.678665366  |
| PVX_081385 | 0.002855585 | 0             | 2.302798657  |
| PVX_081390 | 0.007054102 | 0             | 2.062728892  |
| PVX_081395 | 0.166224591 | 0             | 0.301669139  |
| PVX_081400 | 0.001084333 | 0             | 2.515809786  |
| PVX_081405 | 0.002855585 | 0             | 2.916837935  |
| PVX_081410 | 0.166224591 | 0             | 0.569320321  |

| GeneID     | Pvalue      | BackGroundPre | BackGroundDx |
|------------|-------------|---------------|--------------|
| PVX_081415 | 0.166224591 | 0             | 0.701563056  |
| PVX_081420 | 0.166224591 | 0             | 1.072978038  |
| PVX_081425 | 1           | 0             | 0            |
| PVX_081430 | 0.359317338 | 0             | 0.310136821  |
| PVX_081435 | 0.007054102 | 0             | 1.856749384  |
| PVX_081440 | 1           | 0             | 0            |
| PVX_081445 | 1           | 0             | 0            |
| PVX_081450 | 0.036687443 | 0             | 1.475121246  |
| PVX_081455 | 0.002855585 | 0             | 2.061336892  |
| PVX_081460 | 0.359317338 | 0             | 0.478096333  |
| PVX_081465 | 0.166224591 | 0             | 0.675679547  |
| PVX_081470 | 0.016473156 | 0             | 1.775850438  |
| PVX_081475 | 0.001084333 | 0             | 3.02740462   |
| PVX_081480 | 0.078805602 | 0             | 0.92755853   |
| PVX_081485 | 0.001084333 | 0             | 2.103808049  |
| PVX_081490 | 0.001084333 | 0             | 2.313998508  |
| PVX_081495 | 0.036687443 | 0             | 1.655874875  |
| PVX_081498 | 0.166224591 | 0             | 0.838830547  |
| PVX_081502 | 0.166224591 | 0             | 0.860899414  |
| PVX_081505 | 0.000383392 | 0             | 3.300738578  |
| PVX_081510 | 0.036687443 | 0             | 1.788313791  |
| PVX_081515 | 0.016473156 | 0             | 1.34856486   |
| PVX_081520 | 1           | 0             | 0            |
| PVX_081525 | 0.036687443 | 0             | 0.923207914  |
| PVX_081530 | 0.000383392 | 0             | 3.243669159  |
| PVX_081535 | 0.002855585 | 0             | 2.73884442   |
| PVX_081540 | 0.000383392 | 0             | 2.046635417  |
| PVX_081550 | 0.359317338 | 0             | 0.27586581   |
| PVX_081555 | 0.359317338 | 0             | 0.234358008  |
| PVX_081560 | 1           | 0             | 0            |
| PVX_081565 | 0.001084333 | 0             | 3.019287256  |
| PVX_081570 | 0.166224591 | 0             | 0.665754703  |
| PVX_081572 | 0.036687443 | 0             | 1.219515689  |
| PVX_081575 | 0.036687443 | 0             | 0.689637314  |
| PVX_081580 | 0.359317338 | 0             | 0.207174107  |
| PVX_081585 | 0.000125309 | 0             | 3.212146072  |
| PVX_081590 | 0.016473156 | 0             | 1.463418722  |
| PVX_081595 | 0.000383392 | 0             | 3.676387184  |
| PVX_081600 | 0.078805602 | 0             | 0.685835276  |
| PVX_081605 | 1           | 0             | 0            |
| PVX_081610 | 0.000125309 | 0             | 3.978069819  |

| GeneID     | Pvalue      | BackGroundPre | BackGroundDx |
|------------|-------------|---------------|--------------|
| PVX_081615 | 0.078805602 | 0             | 0.973799135  |
| PVX_081620 | 0.036687443 | 0             | 1.090541588  |
| PVX_081625 | 0.001084333 | 0             | 1.641370656  |
| PVX_081630 | 0.000125309 | 0             | 2.588129615  |
| PVX_081635 | 0.016473156 | 0             | 1.459081386  |
| PVX_081640 | 0.016473156 | 0             | 2.337469633  |
| PVX_081645 | 0.166224591 | 0             | 1.090393365  |
| PVX_081650 | 0.007054102 | 0             | 2.317407481  |
| PVX_081655 | 0.007054102 | 0             | 1.669702912  |
| PVX_081660 | 0.007054102 | 0             | 1.831039781  |
| PVX_081665 | 1           | 0             | 0            |
| PVX_081670 | 0.036687443 | 0             | 0.99153171   |
| PVX_081675 | 0.002855585 | 0             | 2.831516339  |
| PVX_081680 | 0.166224591 | 0             | 0.652404069  |
| PVX_081685 | 0.007054102 | 0             | 1.679312804  |
| PVX_081690 | 0.007054102 | 0             | 1.671565803  |
| PVX_081695 | 0.001084333 | 0             | 2.378646067  |
| PVX_081700 | 0.036687443 | 0             | 0.946427838  |
| PVX_081705 | 0.001084333 | 0             | 3.32241708   |
| PVX_081707 | 0.166224591 | 0             | 0.265534853  |
| PVX_081710 | 1           | 0             | 0            |
| PVX_081715 | 0.036687443 | 0             | 1.665897276  |
| PVX_081720 | 0.166224591 | 0             | 0.823658273  |
| PVX_081722 | 1           | 0             | 0            |
| PVX_081725 | 0.000383392 | 0             | 2.498710032  |
| PVX_081730 | 0.359317338 | 0             | 0.253680833  |
| PVX_081740 | 0.016473156 | 0             | 1.727827317  |
| PVX_081745 | 0.001084333 | 0             | 2.804456458  |
| PVX_081750 | 0.016473156 | 0             | 2.114273882  |
| PVX_081755 | 0.166224591 | 0             | 0.2697562    |
| PVX_081760 | 0.036687443 | 0             | 1.612487879  |
| PVX_081765 | 0.002855585 | 0             | 2.474922323  |
| PVX_081770 | 0.002855585 | 0             | 2.643571987  |
| PVX_081775 | 0.002855585 | 0             | 2.308825384  |
| PVX_081780 | 0.036687443 | 0             | 1.612749729  |
| PVX_081785 | 0.007054102 | 0             | 1.856326352  |
| PVX_081790 | 1           | 0             | 0            |
| PVX_081792 | 0.078805602 | 0             | 0.430844062  |
| PVX_081795 | 1           | 0             | 0            |
| PVX_081800 | 0.036687443 | 0             | 1.067849206  |
| PVX_081805 | 0.007054102 | 0             | 1.782336591  |

| GeneID     | Pvalue      | BackGroundPre | BackGroundDx |
|------------|-------------|---------------|--------------|
| PVX_081810 | 0.000383392 | 0             | 3.242319682  |
| PVX_081815 | 1           | 0             | 0            |
| PVX_081820 | 0.002855585 | 0             | 1.39589732   |
| PVX_081822 | 1           | 0             | 0            |
| PVX_081824 | 1           | 0             | 0            |
| PVX_081825 | 1           | 0             | 0            |
| PVX_081830 | 1.03E-05    | 0             | 6.182988102  |
| PVX_081832 | 0.016473156 | 0             | 1.826031437  |
| PVX_081835 | 0.359317338 | 0             | 0.318643931  |
| PVX_081840 | 0.036687443 | 0             | 1.502552243  |
| PVX_081845 | 0.036687443 | 0             | 1.271052629  |
| PVX_081847 | 3.76E-05    | 0             | 4.771442969  |
| PVX_081850 | 1           | 0             | 0            |
| PVX_082350 | 0.078805602 | 0             | 0.61088527   |
| PVX_082355 | 0.000125309 | 0             | 4.497496013  |
| PVX_082360 | 0.166224591 | 0             | 0.416439892  |
| PVX_082365 | 0.078805602 | 0             | 1.180045776  |
| PVX_082370 | 0.016473156 | 0             | 1.713229266  |
| PVX_082375 | 0.016473156 | 0             | 1.434928631  |
| PVX_082380 | 1           | 0             | 0            |
| PVX_082385 | 0.007054102 | 0             | 2.234225253  |
| PVX_082390 | 0.002855585 | 0             | 2.730122284  |
| PVX_082395 | 0.001084333 | 0             | 1.943916727  |
| PVX_082400 | 0.016473156 | 0             | 1.257512507  |
| PVX_082405 | 1           | 0             | 0            |
| PVX_082410 | 0.007054102 | 0             | 1.968981898  |
| PVX_082415 | 1           | 0             | 0            |
| PVX_082420 | 0.001084333 | 0             | 1.769169272  |
| PVX_082425 | 0.001084333 | 0             | 2.950542104  |
| PVX_082430 | 1           | 0             | 0            |
| PVX_082435 | 0.166224591 | 0             | 0.522306611  |
| PVX_082437 | 0.359317338 | 0             | 0.42107096   |
| PVX_082440 | 0.078805602 | 0             | 1.271074632  |
| PVX_082445 | 0.002855585 | 0             | 3.063868577  |
| PVX_082450 | 0.001084333 | 0             | 3.441736045  |
| PVX_082455 | 0.078805602 | 0             | 1.099982344  |
| PVX_082460 | 0.359317338 | 0             | 0.33094582   |
| PVX_082465 | 0.000383392 | 0             | 3.20701358   |
| PVX_082470 | 0.000383392 | 0             | 3.597284643  |
| PVX_082475 | 0.001084333 | 0             | 2.405672472  |
| PVX_082480 | 0.000125309 | 0             | 3.842971398  |



| GeneID     | Pvalue      | BackGroundPre | BackGroundDx |
|------------|-------------|---------------|--------------|
| PVX_082485 | 0.359317338 | 0             | 0.220178191  |
| PVX_082490 | 0.166224591 | 0             | 0.436374869  |
| PVX_082495 | 0.036687443 | 0             | 1.513353225  |
| PVX_082500 | 0.078805602 | 0             | 1.22925608   |
| PVX_082505 | 1           | 0             | 0            |
| PVX_082510 | 0.036687443 | 0             | 1.221141007  |
| PVX_082515 | 0.036687443 | 0             | 1.553324568  |
| PVX_082520 | 3.76E-05    | 0             | 4.312916698  |
| PVX_082525 | 0.000125309 | 0             | 5.408594197  |
| PVX_082530 | 0.036687443 | 0             | 1.496169469  |
| PVX_082535 | 1           | 0             | 0            |
| PVX_082540 | 1           | 0             | 0            |
| PVX_082545 | 0.078805602 | 0             | 1.28353896   |
| PVX_082550 | 3.76E-05    | 0             | 3.895991256  |
| PVX_082555 | 0.007054102 | 0             | 2.33685912   |
| PVX_082560 | 0.001084333 | 0             | 2.993660672  |
| PVX_082565 | 0.036687443 | 0             | 1.141254158  |
| PVX_082570 | 0.007054102 | 0             | 2.642649169  |
| PVX_082575 | 0.001084333 | 0             | 2.590932203  |
| PVX_082580 | 0.016473156 | 0             | 1.865339446  |
| PVX_082585 | 1           | 0             | 0            |
| PVX_082590 | 0.078805602 | 0             | 0.57852453   |
| PVX_082595 | 0.036687443 | 0             | 1.845960884  |
| PVX_082600 | 0.007054102 | 0             | 2.658210094  |
| PVX_082605 | 0.036687443 | 0             | 1.572898388  |
| PVX_082610 | 0.001084333 | 0             | 2.336314475  |
| PVX_082615 | 1           | 0             | 0            |
| PVX_082620 | 0.078805602 | 0             | 1.130518031  |
| PVX_082625 | 0.007054102 | 0             | 1.646049281  |
| PVX_082630 | 0.359317338 | 0             | 0.277456316  |
| PVX_082635 | 0.016473156 | 0             | 1.431186734  |
| PVX_082640 | 0.001084333 | 0             | 2.981496162  |
| PVX_082645 | 0.002855585 | 0             | 3.029040224  |
| PVX_082650 | 1           | 0             | 0            |
| PVX_082655 | 1           | 0             | 0            |
| PVX_082660 | 0.166224591 | 0             | 0.821981928  |
| PVX_082665 | 1           | 0             | 0            |
| PVX_082670 | 0.359317338 | 0             | 0.330460172  |
| PVX_082675 | 1           | 0             | 0            |
| PVX_082680 | 1           | 0             | 0            |
| PVX_082685 | 1           | 0             | 0            |

| GeneID     | Pvalue      | BackGroundPre | BackGroundDx |
|------------|-------------|---------------|--------------|
| PVX_082690 | 1           | 0             | 0            |
| PVX_082695 | 1           | 0             | 0            |
| PVX_082700 | 0.359317338 | 0             | 0.370658123  |
| PVX_082710 | 0.036687443 | 0             | 1.605169262  |
| PVX_082715 | 1           | 0             | 0            |
| PVX_082720 | 0.016473156 | 0             | 1.97942847   |
| PVX_082725 | 0.007054102 | 0             | 1.723984793  |
| PVX_082730 | 0.007054102 | 0             | 1.912771254  |
| PVX_082735 | 1           | 0             | 0            |
| PVX_082740 | 0.166224591 | 0             | 0.601285354  |
| PVX_082742 | 0.078805602 | 0             | 1.31203104   |
| PVX_082745 | 0.001084333 | 0             | 3.027607256  |
| PVX_082750 | 0.036687443 | 0             | 1.184343262  |
| PVX_082755 | 0.016473156 | 0             | 1.917023577  |
| PVX_082760 | 0.078805602 | 0             | 1.18850935   |
| PVX_082765 | 0.016473156 | 0             | 1.84381811   |
| PVX_082770 | 0.007054102 | 0             | 2.433607236  |
| PVX_082775 | 0.016473156 | 0             | 1.643849007  |
| PVX_082780 | 0.036687443 | 0             | 0.995050787  |
| PVX_082785 | 0.036687443 | 0             | 1.485270744  |
| PVX_082790 | 0.002855585 | 0             | 2.249412602  |
| PVX_082795 | 0.001084333 | 0             | 2.709218928  |
| PVX_082800 | 0.036687443 | 0             | 1.189770388  |
| PVX_082810 | 0.036687443 | 0             | 0.765987903  |
| PVX_082813 | 1           | 0             | 0            |
| PVX_082815 | 1           | 0             | 0            |
| PVX_082820 | 0.359317338 | 0             | 0.342726778  |
| PVX_082825 | 0.078805602 | 0             | 0.95105852   |
| PVX_082830 | 0.078805602 | 0             | 1.048267682  |
| PVX_082835 | 0.002855585 | 0             | 2.758254693  |
| PVX_082840 | 0.000125309 | 0             | 5.659509992  |
| PVX_082845 | 3.76E-05    | 0             | 5.318486109  |
| PVX_082850 | 1           | 0             | 0            |
| PVX_082855 | 0.002855585 | 0             | 2.27350406   |
| PVX_082860 | 0.002855585 | 0             | 2.330172085  |
| PVX_082865 | 0.016473156 | 0             | 1.623844946  |
| PVX_082870 | 1           | 0             | 0            |
| PVX_082875 | 1           | 0             | 0            |
| PVX_082880 | 0.036687443 | 0             | 1.111180678  |
| PVX_082882 | 1           | 0             | 0            |
| PVX_082884 | 1           | 0             | 0            |

| GeneID     | Pvalue      | BackGroundPre | BackGroundDx |
|------------|-------------|---------------|--------------|
| PVX_082885 | 0.166224591 | 0             | 0.770315144  |
| PVX_082890 | 0.016473156 | 0             | 2.453219137  |
| PVX_082895 | 0.078805602 | 0             | 1.216392024  |
| PVX_082900 | 0.036687443 | 0             | 1.435697431  |
| PVX_082905 | 0.078805602 | 0             | 0.675482723  |
| PVX_082910 | 0.078805602 | 0             | 1.019844308  |
| PVX_082915 | 0.166224591 | 0             | 0.571379271  |
| PVX_082920 | 1           | 0             | 0            |
| PVX_082925 | 0.007054102 | 0             | 2.310736515  |
| PVX_082930 | 1           | 0             | 0            |
| PVX_082935 | 0.007054102 | 0             | 2.011565337  |
| PVX_082937 | 0.166224591 | 0             | 0.71688819   |
| PVX_082938 | 0.359317338 | 0             | 0.200893479  |
| PVX_082945 | 0.007054102 | 0             | 2.258733492  |
| PVX_082950 | 1           | 0             | 0            |
| PVX_082955 | 0.359317338 | 0             | 0.419391401  |
| PVX_082960 | 0.016473156 | 0             | 1.632589936  |
| PVX_082962 | 1           | 0             | 0            |
| PVX_082964 | 1           | 0             | 0            |
| PVX_082965 | 3.76E-05    | 0             | 5.303473389  |
| PVX_082970 | 0.002855585 | 0             | 3.388817311  |
| PVX_082975 | 1           | 0             | 0            |
| PVX_082980 | 0.036687443 | 0             | 1.00419356   |
| PVX_082985 | 0.359317338 | 0             | 0.458048499  |
| PVX_082990 | 0.359317338 | 0             | 0.235234861  |
| PVX_082995 | 0.166224591 | 0             | 0.907514336  |
| PVX_083000 | 1.03E-05    | 0             | 6.648162913  |
| PVX_083005 | 0.016473156 | 0             | 1.730413473  |
| PVX_083010 | 0.036687443 | 0             | 1.139759821  |
| PVX_083015 | 0.016473156 | 0             | 1.92850725   |
| PVX_083020 | 0.007054102 | 0             | 2.160810518  |
| PVX_083025 | 1           | 0             | 0            |
| PVX_083030 | 3.76E-05    | 0             | 3.828318642  |
| PVX_083032 | 0.359317338 | 0             | 0.62761016   |
| PVX_083035 | 0.016473156 | 0             | 1.750894851  |
| PVX_083040 | 0.001084333 | 0             | 1.689372396  |
| PVX_083045 | 3.76E-05    | 0             | 6.227257706  |
| PVX_083050 | 0.036687443 | 0             | 1.145493024  |
| PVX_083055 | 0.002855585 | 0             | 2.394415889  |
| PVX_083060 | 0.002855585 | 0             | 2.206956363  |
| PVX_083065 | 0.036687443 | 0             | 0.948320795  |

| GeneID     | Pvalue      | BackGroundPre | BackGroundDx |
|------------|-------------|---------------|--------------|
| PVX_083070 | 0.036687443 | 0             | 1.633316722  |
| PVX_083075 | 0.078805602 | 0             | 1.059826943  |
| PVX_083080 | 0.016473156 | 0             | 1.514591066  |
| PVX_083085 | 0.359317338 | 0             | 0.081275858  |
| PVX_083090 | 0.166224591 | 0             | 0.666813066  |
| PVX_083095 | 0.007054102 | 0             | 1.658738516  |
| PVX_083100 | 0.036687443 | 0             | 1.055739868  |
| PVX_083105 | 3.76E-05    | 0             | 3.858391849  |
| PVX_083110 | 0.002855585 | 0             | 1.949130465  |
| PVX_083115 | 0.036687443 | 0             | 1.255285948  |
| PVX_083120 | 0.036687443 | 0             | 1.653850181  |
| PVX_083125 | 0.166224591 | 0             | 0.533291627  |
| PVX_083130 | 0.007054102 | 0             | 1.764729981  |
| PVX_083135 | 0.036687443 | 0             | 1.432929926  |
| PVX_083140 | 0.007054102 | 0             | 1.549835687  |
| PVX_083150 | 0.166224591 | 0             | 0.666396482  |
| PVX_083155 | 0.016473156 | 0             | 2.19602086   |
| PVX_083160 | 0.166224591 | 0             | 0.528829747  |
| PVX_083165 | 0.002855585 | 0             | 2.938179286  |
| PVX_083170 | 0.078805602 | 0             | 0.546233866  |
| PVX_083175 | 0.016473156 | 0             | 2.148433413  |
| PVX_083180 | 1           | 0             | 0            |
| PVX_083185 | 0.001084333 | 0             | 3.193834683  |
| PVX_083190 | 0.000383392 | 0             | 3.308514579  |
| PVX_083195 | 0.166224591 | 0             | 0.760990894  |
| PVX_083200 | 1           | 0             | 0            |
| PVX_083205 | 0.000383392 | 0             | 3.949273462  |
| PVX_083210 | 0.078805602 | 0             | 1.179245744  |
| PVX_083215 | 0.007054102 | 0             | 2.579005712  |
| PVX_083220 | 0.002855585 | 0             | 1.525541924  |
| PVX_083225 | 0.007054102 | 0             | 2.098886843  |
| PVX_083230 | 0.016473156 | 0             | 1.915876791  |
| PVX_083235 | 0.359317338 | 0             | 0.250351349  |
| PVX_083240 | 0.036687443 | 0             | 1.124384386  |
| PVX_083245 | 0.036687443 | 0             | 1.510405151  |
| PVX_083250 | 0.359317338 | 0             | 0.291323594  |
| PVX_083255 | 0.036687443 | 0             | 1.122152629  |
| PVX_083260 | 0.007054102 | 0             | 2.110547311  |
| PVX_083262 | 1           | 0             | 0            |
| PVX_083265 | 0.166224591 | 0             | 0.875057363  |
| PVX_083270 | 1.03E-05    | 0             | 6.278241574  |

| GeneID     | Pvalue      | BackGroundPre | BackGroundDx |
|------------|-------------|---------------|--------------|
| PVX_083275 | 0.359317338 | 0             | 0.274471702  |
| PVX_083280 | 0.001084333 | 0             | 3.037953791  |
| PVX_083285 | 0.078805602 | 0             | 1.009059274  |
| PVX_083290 | 0.007054102 | 0             | 1.636780867  |
| PVX_083295 | 1           | 0             | 0            |
| PVX_083300 | 1           | 0             | 0            |
| PVX_083305 | 0.166224591 | 0             | 0.698331047  |
| PVX_083310 | 0.007054102 | 0             | 1.632840775  |
| PVX_083315 | 0.007054102 | 0             | 0.984364102  |
| PVX_083320 | 0.036687443 | 0             | 1.611590341  |
| PVX_083325 | 0.166224591 | 0             | 0.544940255  |
| PVX_083330 | 0.078805602 | 0             | 0.705596721  |
| PVX_083335 | 0.166224591 | 0             | 0.302899117  |
| PVX_083340 | 0.007054102 | 0             | 2.184709319  |
| PVX_083345 | 0.359317338 | 0             | 0.374096933  |
| PVX_083350 | 0.000125309 | 0             | 5.141656104  |
| PVX_083355 | 0.000383392 | 0             | 3.061408971  |
| PVX_083360 | 0.007054102 | 0             | 1.61868624   |
| PVX_083365 | 0.078805602 | 0             | 1.132142475  |
| PVX_083370 | 0.001084333 | 0             | 2.025665592  |
| PVX_083375 | 0.036687443 | 0             | 1.293557475  |
| PVX_083380 | 0.166224591 | 0             | 0.693878573  |
| PVX_083385 | 0.007054102 | 0             | 2.058527192  |
| PVX_083390 | 1           | 0             | 0            |
| PVX_083395 | 1           | 0             | 0            |
| PVX_083400 | 0.000383392 | 0             | 3.317673909  |
| PVX_083405 | 0.036687443 | 0             | 2.165345982  |
| PVX_083410 | 0.001084333 | 0             | 3.356804047  |
| PVX_083415 | 0.078805602 | 0             | 0.891289008  |
| PVX_083420 | 0.078805602 | 0             | 0.786689582  |
| PVX_083425 | 0.016473156 | 0             | 1.980737215  |
| PVX_083430 | 0.078805602 | 0             | 0.964423546  |
| PVX_083435 | 0.078805602 | 0             | 1.129340732  |
| PVX_083440 | 1           | 0             | 0            |
| PVX_083445 | 0.002855585 | 0             | 2.230206485  |
| PVX_083450 | 0.007054102 | 0             | 2.715206882  |
| PVX_083455 | 0.036687443 | 0             | 0.928261602  |
| PVX_083460 | 0.078805602 | 0             | 0.911875764  |
| PVX_083465 | 3.76E-05    | 0             | 5.864579692  |
| PVX_083470 | 0.078805602 | 0             | 0.748075089  |
| PVX_083475 | 1           | 0             | 0            |

| GeneID     | Pvalue      | BackGroundPre | BackGroundDx |
|------------|-------------|---------------|--------------|
| PVX_083480 | 0.000125309 | 0             | 4.383577147  |
| PVX_083485 | 0.166224591 | 0             | 0.600896589  |
| PVX_083490 | 0.007054102 | 0             | 1.421821226  |
| PVX_083495 | 0.036687443 | 0             | 1.046254547  |
| PVX_083500 | 0.007054102 | 0             | 1.708338516  |
| PVX_083505 | 0.078805602 | 0             | 0.829445284  |
| PVX_083510 | 0.002855585 | 0             | 2.080220238  |
| PVX_083515 | 0.007054102 | 0             | 2.265622827  |
| PVX_083520 | 0.166224591 | 0             | 0.515745358  |
| PVX_083530 | 0.000383392 | 0             | 2.23211373   |
| PVX_083535 | 0.036687443 | 0             | 1.231037956  |
| PVX_083545 | 0.078805602 | 0             | 1.13567311   |
| PVX_083550 | 0.016473156 | 0             | 1.504145529  |
| PVX_083555 | 3.76E-05    | 0             | 5.889263961  |
| PVX_083560 | 1.03E-05    | 0             | 6.388231546  |
| PVX_083565 | 1           | 0             | 0            |
| PVX_083570 | 0.078805602 | 0             | 1.128041467  |
| PVX_083575 | 1           | 0             | 0            |
| PVX_083580 | 1           | 0             | 0            |
| PVX_083585 | 0.359317338 | 0             | 0.27046598   |
| PVX_083590 | 0.166224591 | 0             | 0.730145731  |
| PVX_084090 | 0.359317338 | 0             | 0.502648001  |
| PVX_084095 | 1           | 0             | 0            |
| PVX_084100 | 0.007054102 | 0             | 1.955805357  |
| PVX_084105 | 0.359317338 | 0             | 0.308284069  |
| PVX_084110 | 1           | 0             | 0            |
| PVX_084115 | 0.359317338 | 0             | 0.319373306  |
| PVX_084120 | 0.016473156 | 0             | 1.940906756  |
| PVX_084125 | 0.001084333 | 0             | 2.644575902  |
| PVX_084130 | 0.036687443 | 0             | 1.549434     |
| PVX_084135 | 0.002855585 | 0             | 2.54043937   |
| PVX_084160 | 0.036687443 | 0             | 0.546928322  |
| PVX_084165 | 0.016473156 | 0             | 1.624606001  |
| PVX_084170 | 0.359317338 | 0             | 0.259694094  |
| PVX_084175 | 0.001084333 | 0             | 2.302121784  |
| PVX_084180 | 0.000383392 | 0             | 3.445837155  |
| PVX_084185 | 0.078805602 | 0             | 1.696554789  |
| PVX_084190 | 0.001084333 | 0             | 4.178654461  |
| PVX_084195 | 0.359317338 | 0             | 0.154967863  |
| PVX_084200 | 0.016473156 | 0             | 1.721216723  |
| PVX_084205 | 0.007054102 | 0             | 2.688765593  |

| GeneID     | Pvalue      | BackGroundPre | BackGroundDx |
|------------|-------------|---------------|--------------|
| PVX_084210 | 0.016473156 | 0             | 1.771286238  |
| PVX_084215 | 0.001084333 | 0             | 2.599434106  |
| PVX_084220 | 0.001084333 | 0             | 2.733191294  |
| PVX_084225 | 0.016473156 | 0             | 1.846257177  |
| PVX_084230 | 0.000125309 | 0             | 3.641339761  |
| PVX_084235 | 0.036687443 | 0             | 1.69631169   |
| PVX_084240 | 1           | 0             | 0            |
| PVX_084245 | 0.359317338 | 0             | 0.287133612  |
| PVX_084250 | 0.016473156 | 0             | 1.634156418  |
| PVX_084255 | 0.000125309 | 0             | 4.409143208  |
| PVX_084260 | 0.359317338 | 0             | 0.285492188  |
| PVX_084265 | 0.036687443 | 0             | 1.273925833  |
| PVX_084270 | 0.078805602 | 0             | 0.840972027  |
| PVX_084275 | 0.036687443 | 0             | 1.663661073  |
| PVX_084277 | 1           | 0             | 0            |
| PVX_084280 | 0.000383392 | 0             | 2.784342842  |
| PVX_084285 | 0.036687443 | 0             | 1.218610165  |
| PVX_084290 | 1           | 0             | 0            |
| PVX_084295 | 0.078805602 | 0             | 0.710148532  |
| PVX_084300 | 0.078805602 | 0             | 0.74427374   |
| PVX_084305 | 0.007054102 | 0             | 1.654317881  |
| PVX_084310 | 0.000125309 | 0             | 4.446860803  |
| PVX_084315 | 0.359317338 | 0             | 0.319571762  |
| PVX_084320 | 1           | 0             | 0            |
| PVX_084325 | 0.000125309 | 0             | 2.434680664  |
| PVX_084330 | 0.000383392 | 0             | 2.942282821  |
| PVX_084335 | 0.007054102 | 0             | 2.478796551  |
| PVX_084340 | 0.359317338 | 0             | 0.306847458  |
| PVX_084345 | 3.76E-05    | 0             | 4.209337542  |
| PVX_084350 | 0.166224591 | 0             | 0.35703954   |
| PVX_084355 | 0.036687443 | 0             | 1.43514961   |
| PVX_084360 | 1           | 0             | 0            |
| PVX_084365 | 0.036687443 | 0             | 1.151092905  |
| PVX_084370 | 0.000383392 | 0             | 3.627912738  |
| PVX_084375 | 0.359317338 | 0             | 0.322655448  |
| PVX_084380 | 0.078805602 | 0             | 0.62678279   |
| PVX_084385 | 0.359317338 | 0             | 0.101855947  |
| PVX_084390 | 0.001084333 | 0             | 2.694522995  |
| PVX_084395 | 0.166224591 | 0             | 0.415971143  |
| PVX_084400 | 1           | 0             | 0            |
| PVX_084405 | 1           | 0             | 0            |

| GeneID     | Pvalue      | BackGroundPre | BackGroundDx |
|------------|-------------|---------------|--------------|
| PVX_084410 | 0.359317338 | 0             | 0.297590769  |
| PVX_084415 | 0.166224591 | 0             | 0.706800746  |
| PVX_084417 | 0.007054102 | 0             | 2.009194845  |
| PVX_084420 | 1           | 0             | 0            |
| PVX_084425 | 0.359317338 | 0             | 0.3297943    |
| PVX_084430 | 0.078805602 | 0             | 0.823762625  |
| PVX_084435 | 0.166224591 | 0             | 0.733016427  |
| PVX_084440 | 0.002855585 | 0             | 1.531380923  |
| PVX_084445 | 0.036687443 | 0             | 0.65834853   |
| PVX_084450 | 0.016473156 | 0             | 2.211556497  |
| PVX_084455 | 0.166224591 | 0             | 0.582953886  |
| PVX_084460 | 0.166224591 | 0             | 0.427766011  |
| PVX_084462 | 0.078805602 | 0             | 1.653749964  |
| PVX_084465 | 0.001084333 | 0             | 3.099643512  |
| PVX_084470 | 0.016473156 | 0             | 1.104223315  |
| PVX_084475 | 0.078805602 | 0             | 0.658018336  |
| PVX_084480 | 0.007054102 | 0             | 2.65986055   |
| PVX_084485 | 0.359317338 | 0             | 0.191210307  |
| PVX_084490 | 0.016473156 | 0             | 1.865172848  |
| PVX_084495 | 0.036687443 | 0             | 0.867548882  |
| PVX_084500 | 0.078805602 | 0             | 1.013315829  |
| PVX_084505 | 0.166224591 | 0             | 0.366411818  |
| PVX_084510 | 1           | 0             | 0            |
| PVX_084515 | 0.016473156 | 0             | 1.864268616  |
| PVX_084519 | 0.036687443 | 0             | 1.795135737  |
| PVX_084521 | 0.016473156 | 0             | 1.320305476  |
| PVX_084525 | 0.016473156 | 0             | 1.664886241  |
| PVX_084530 | 0.359317338 | 0             | 0.1139559    |
| PVX_084535 | 0.078805602 | 0             | 0.991990404  |
| PVX_084540 | 0.166224591 | 0             | 0.335280819  |
| PVX_084545 | 0.007054102 | 0             | 2.441750752  |
| PVX_084550 | 1           | 0             | 0            |
| PVX_084555 | 0.078805602 | 0             | 0.787086064  |
| PVX_084560 | 0.016473156 | 0             | 1.739878407  |
| PVX_084565 | 0.007054102 | 0             | 1.644751961  |
| PVX_084570 | 0.078805602 | 0             | 0.760312146  |
| PVX_084575 | 1           | 0             | 0            |
| PVX_084580 | 1           | 0             | 0            |
| PVX_084585 | 1           | 0             | 0            |
| PVX_084590 | 0.002855585 | 0             | 2.046753193  |
| PVX_084595 | 0.036687443 | 0             | 0.940864184  |



| GeneID     | Pvalue      | BackGroundPre | BackGroundDx |
|------------|-------------|---------------|--------------|
| PVX_084600 | 0.000383392 | 0             | 3.897224423  |
| PVX_084605 | 0.007054102 | 0             | 2.11175899   |
| PVX_084610 | 0.078805602 | 0             | 0.600189638  |
| PVX_084615 | 0.016473156 | 0             | 1.572029058  |
| PVX_084620 | 1.03E-05    | 0             | 5.652099781  |
| PVX_084625 | 0.002855585 | 0             | 1.874531799  |
| PVX_084630 | 0.001084333 | 0             | 3.415077946  |
| PVX_084635 | 0.007054102 | 0             | 1.984249584  |
| PVX_084640 | 0.036687443 | 0             | 1.625151953  |
| PVX_084645 | 0.001084333 | 0             | 3.150538698  |
| PVX_084650 | 0.000383392 | 0             | 3.961862359  |
| PVX_084655 | 0.007054102 | 0             | 2.256925862  |
| PVX_084660 | 0.001084333 | 0             | 2.582641783  |
| PVX_084665 | 0.007054102 | 0             | 2.135514558  |
| PVX_084670 | 0.036687443 | 0             | 1.592291876  |
| PVX_084675 | 0.000383392 | 0             | 3.395352638  |
| PVX_084680 | 1           | 0             | 0            |
| PVX_084685 | 0.001084333 | 0             | 2.715522727  |
| PVX_084687 | 0.078805602 | 0             | 1.297015195  |
| PVX_084690 | 0.016473156 | 0             | 1.349316306  |
| PVX_084695 | 0.078805602 | 0             | 1.322621741  |
| PVX_084698 | 0.359317338 | 0             | 0.339054503  |
| PVX_084702 | 0.036687443 | 0             | 1.18014441   |
| PVX_084705 | 0.166224591 | 0             | 0.568599725  |
| PVX_084710 | 0.036687443 | 0             | 1.353906146  |
| PVX_084715 | 0.007054102 | 0             | 1.607945855  |
| PVX_084720 | 0.007054102 | 0             | 1.957515121  |
| PVX_084725 | 0.166224591 | 0             | 0.282706033  |
| PVX_084730 | 0.002855585 | 0             | 1.73970468   |
| PVX_084735 | 0.002855585 | 0             | 2.599338979  |
| PVX_084740 | 0.036687443 | 0             | 1.4870889    |
| PVX_084745 | 0.007054102 | 0             | 1.876269557  |
| PVX_084750 | 0.007054102 | 0             | 2.037834423  |
| PVX_084755 | 0.359317338 | 0             | 0.164957844  |
| PVX_084760 | 0.036687443 | 0             | 1.636496471  |
| PVX_084765 | 0.078805602 | 0             | 1.032866104  |
| PVX_084770 | 0.000383392 | 0             | 2.202373422  |
| PVX_084775 | 0.359317338 | 0             | 0.211537285  |
| PVX_084780 | 0.016473156 | 0             | 1.744520598  |
| PVX_084785 | 0.007054102 | 0             | 2.205557088  |
| PVX_084790 | 0.359317338 | 0             | 0.234197675  |

| GeneID     | Pvalue      | BackGroundPre | BackGroundDx |
|------------|-------------|---------------|--------------|
| PVX_084795 | 0.000383392 | 0             | 4.033262584  |
| PVX_084800 | 1           | 0             | 0            |
| PVX_084805 | 0.002855585 | 0             | 2.731464448  |
| PVX_084810 | 0.001084333 | 0             | 1.544022455  |
| PVX_084815 | 1           | 0             | 0            |
| PVX_084820 | 0.001084333 | 0             | 3.751205657  |
| PVX_084825 | 0.007054102 | 0             | 2.496901856  |
| PVX_084830 | 0.078805602 | 0             | 0.989956322  |
| PVX_084835 | 0.166224591 | 0             | 0.631188705  |
| PVX_084837 | 0.036687443 | 0             | 0.730665591  |
| PVX_084840 | 0.166224591 | 0             | 0.307368094  |
| PVX_084845 | 0.036687443 | 0             | 1.190102057  |
| PVX_084850 | 0.002855585 | 0             | 3.41782118   |
| PVX_084855 | 0.001084333 | 0             | 2.280892567  |
| PVX_084860 | 0.000125309 | 0             | 2.225444622  |
| PVX_084870 | 0.078805602 | 0             | 0.812425761  |
| PVX_084875 | 1           | 0             | 0            |
| PVX_084885 | 0.000383392 | 0             | 2.679333144  |
| PVX_084895 | 0.007054102 | 0             | 2.842103206  |
| PVX_084900 | 1           | 0             | 0            |
| PVX_084905 | 0.002855585 | 0             | 2.488946894  |
| PVX_084910 | 0.078805602 | 0             | 1.129110547  |
| PVX_084915 | 0.036687443 | 0             | 0.924762567  |
| PVX_084920 | 0.016473156 | 0             | 1.605806483  |
| PVX_084925 | 1           | 0             | 0            |
| PVX_084930 | 0.036687443 | 0             | 0.951192369  |
| PVX_084935 | 0.078805602 | 0             | 0.692473948  |
| PVX_084940 | 0.001084333 | 0             | 3.13957464   |
| PVX_084945 | 0.016473156 | 0             | 1.919965073  |
| PVX_084950 | 0.166224591 | 0             | 0.472663391  |
| PVX_084955 | 3.76E-05    | 0             | 6.065611216  |
| PVX_084960 | 0.359317338 | 0             | 0.276228215  |
| PVX_084965 | 0.166224591 | 0             | 0.413186239  |
| PVX_084970 | 0.016473156 | 0             | 1.489117879  |
| PVX_084975 | 0.007054102 | 0             | 1.701531251  |
| PVX_084980 | 1           | 0             | 0            |
| PVX_084985 | 0.166224591 | 0             | 0.614400196  |
| PVX_084990 | 0.002855585 | 0             | 2.816468495  |
| PVX_084995 | 0.078805602 | 0             | 1.509786879  |
| PVX_085000 | 0.078805602 | 0             | 0.792912628  |
| PVX_085005 | 0.001084333 | 0             | 2.801191639  |

| GeneID     | Pvalue      | BackGroundPre | BackGroundDx |
|------------|-------------|---------------|--------------|
| PVX_085010 | 0.007054102 | 0             | 1.709204066  |
| PVX_085015 | 0.007054102 | 0             | 2.29545793   |
| PVX_085020 | 0.166224591 | 0             | 0.506466749  |
| PVX_085025 | 0.002855585 | 0             | 1.898941598  |
| PVX_085030 | 1           | 0             | 0            |
| PVX_085035 | 0.359317338 | 0             | 0.258869749  |
| PVX_085040 | 1           | 0             | 0            |
| PVX_085045 | 0.166224591 | 0             | 0.417757891  |
| PVX_085050 | 0.000125309 | 0             | 3.642581741  |
| PVX_085055 | 0.007054102 | 0             | 2.076519068  |
| PVX_085060 | 0.007054102 | 0             | 2.578707339  |
| PVX_085065 | 0.002855585 | 0             | 2.271308511  |
| PVX_085070 | 0.036687443 | 0             | 0.66868626   |
| PVX_085080 | 1           | 0             | 0            |
| PVX_085085 | 0.359317338 | 0             | 0.178846513  |
| PVX_085090 | 0.007054102 | 0             | 1.973977294  |
| PVX_085095 | 1           | 0             | 0            |
| PVX_085100 | 0.016473156 | 0             | 1.284737891  |
| PVX_085105 | 0.078805602 | 0             | 1.196758861  |
| PVX_085110 | 0.078805602 | 0             | 1.105640655  |
| PVX_085115 | 0.036687443 | 0             | 1.411346758  |
| PVX_085120 | 0.078805602 | 0             | 0.585495172  |
| PVX_085125 | 0.000125309 | 0             | 4.630794187  |
| PVX_085130 | 0.036687443 | 0             | 1.233699952  |
| PVX_085135 | 0.359317338 | 0             | 0.307333881  |
| PVX_085140 | 0.078805602 | 0             | 1.109760945  |
| PVX_085145 | 3.76E-05    | 0             | 5.35703222   |
| PVX_085150 | 0.036687443 | 0             | 1.268011654  |
| PVX_085152 | 1           | 0             | 0            |
| PVX_085155 | 0.002855585 | 0             | 2.453028416  |
| PVX_085160 | 0.001084333 | 0             | 2.774368027  |
| PVX_085165 | 0.001084333 | 0             | 2.872149185  |
| PVX_085170 | 0.016473156 | 0             | 1.440351776  |
| PVX_085175 | 0.002855585 | 0             | 2.975018313  |
| PVX_085180 | 0.036687443 | 0             | 0.910010379  |
| PVX_085185 | 0.078805602 | 0             | 0.859861611  |
| PVX_085190 | 0.000383392 | 0             | 4.069018286  |
| PVX_085195 | 0.016473156 | 0             | 1.14298426   |
| PVX_085200 | 0.002855585 | 0             | 2.20329311   |
| PVX_085203 | 0.007054102 | 0             | 1.473749764  |
| PVX_085205 | 0.007054102 | 0             | 1.816931589  |

| GeneID     | Pvalue      | BackGroundPre | BackGroundDx |
|------------|-------------|---------------|--------------|
| PVX_085209 | 1           | 0             | 0            |
| PVX_085211 | 0.078805602 | 0             | 0.714296567  |
| PVX_085215 | 1.03E-05    | 0             | 5.195237421  |
| PVX_085220 | 0.000125309 | 0             | 5.246163256  |
| PVX_085225 | 3.76E-05    | 0             | 5.725149669  |
| PVX_085230 | 0.016473156 | 0             | 1.907822612  |
| PVX_085235 | 0.001084333 | 0             | 2.360324261  |
| PVX_085240 | 0.002855585 | 0             | 2.666269397  |
| PVX_085245 | 1           | 0             | 0            |
| PVX_085250 | 0.166224591 | 0             | 0.828336511  |
| PVX_085255 | 1           | 0             | 0            |
| PVX_085260 | 0.078805602 | 0             | 1.097763954  |
| PVX_085265 | 0.016473156 | 0             | 1.798673837  |
| PVX_085270 | 0.000125309 | 0             | 4.803207715  |
| PVX_085275 | 3.76E-05    | 0             | 6.016953602  |
| PVX_085290 | 0.002855585 | 0             | 1.885147695  |
| PVX_085295 | 0.000125309 | 0             | 3.203456458  |
| PVX_085300 | 0.166224591 | 0             | 0.623575031  |
| PVX_085305 | 0.359317338 | 0             | 0.199825364  |
| PVX_085310 | 0.078805602 | 0             | 0.65234516   |
| PVX_085315 | 0.359317338 | 0             | 0.295191704  |
| PVX_085320 | 0.016473156 | 0             | 1.665845648  |
| PVX_085325 | 0.078805602 | 0             | 0.922686081  |
| PVX_085330 | 0.000383392 | 0             | 3.279396321  |
| PVX_085335 | 0.359317338 | 0             | 0.221378278  |
| PVX_085340 | 0.007054102 | 0             | 2.243531639  |
| PVX_085345 | 0.001084333 | 0             | 2.783844311  |
| PVX_085350 | 0.166224591 | 0             | 0.614670892  |
| PVX_085355 | 0.016473156 | 0             | 1.587228964  |
| PVX_085360 | 0.000125309 | 0             | 3.364521572  |
| PVX_085365 | 0.036687443 | 0             | 1.460995253  |
| PVX_085370 | 0.359317338 | 0             | 0.307005867  |
| PVX_085375 | 0.007054102 | 0             | 2.405243668  |
| PVX_085380 | 0.166224591 | 0             | 0.848637013  |
| PVX_085385 | 0.007054102 | 0             | 2.70294076   |
| PVX_085390 | 0.359317338 | 0             | 0.302059739  |
| PVX_085395 | 0.016473156 | 0             | 1.641115568  |
| PVX_085405 | 0.078805602 | 0             | 1.599484247  |
| PVX_085410 | 0.078805602 | 0             | 1.08489382   |
| PVX_085415 | 0.359317338 | 0             | 0.328664427  |
| PVX_085420 | 1.03E-05    | 0             | 7.626922869  |

| GeneID     | Pvalue      | BackGroundPre | BackGroundDx |
|------------|-------------|---------------|--------------|
| PVX_085425 | 0.000125309 | 0             | 3.65981898   |
| PVX_085430 | 0.016473156 | 0             | 2.302395017  |
| PVX_085435 | 0.078805602 | 0             | 0.781603912  |
| PVX_085440 | 0.359317338 | 0             | 0.316521532  |
| PVX_085445 | 0.166224591 | 0             | 0.457425093  |
| PVX_085450 | 0.016473156 | 0             | 1.708872991  |
| PVX_085455 | 0.001084333 | 0             | 2.399637792  |
| PVX_085460 | 0.002855585 | 0             | 2.350959187  |
| PVX_085465 | 0.359317338 | 0             | 0.321929512  |
| PVX_085470 | 0.002855585 | 0             | 1.705784512  |
| PVX_085475 | 1           | 0             | 0            |
| PVX_085480 | 0.002855585 | 0             | 2.756185487  |
| PVX_085485 | 0.002855585 | 0             | 2.424980274  |
| PVX_085490 | 0.000125309 | 0             | 4.18185074   |
| PVX_085495 | 3.76E-05    | 0             | 4.601773036  |
| PVX_085500 | 0.036687443 | 0             | 1.27144124   |
| PVX_085505 | 1           | 0             | 0            |
| PVX_085510 | 0.002855585 | 0             | 1.956486348  |
| PVX_085515 | 0.036687443 | 0             | 1.59020437   |
| PVX_085520 | 0.002855585 | 0             | 2.504102547  |
| PVX_085525 | 0.016473156 | 0             | 1.435321626  |
| PVX_085530 | 0.036687443 | 0             | 1.114647292  |
| PVX_085535 | 0.078805602 | 0             | 0.783787134  |
| PVX_085540 | 0.359317338 | 0             | 0.371939372  |
| PVX_085545 | 0.359317338 | 0             | 0.258774579  |
| PVX_085550 | 0.359317338 | 0             | 0.15095847   |
| PVX_085555 | 0.016473156 | 0             | 1.783332891  |
| PVX_085560 | 0.016473156 | 0             | 1.915021139  |
| PVX_085565 | 0.001084333 | 0             | 2.49832687   |
| PVX_085567 | 0.359317338 | 0             | 0.302757876  |
| PVX_085570 | 0.016473156 | 0             | 1.142278647  |
| PVX_085575 | 0.007054102 | 0             | 2.163740254  |
| PVX_085580 | 0.359317338 | 0             | 0.155342078  |
| PVX_085585 | 0.166224591 | 0             | 0.464450612  |
| PVX_085590 | 0.000125309 | 0             | 2.094530237  |
| PVX_085595 | 0.078805602 | 0             | 1.042866437  |
| PVX_085600 | 0.166224591 | 0             | 0.601416228  |
| PVX_085605 | 0.016473156 | 0             | 1.891065974  |
| PVX_085610 | 0.002855585 | 0             | 2.043524455  |
| PVX_085615 | 1           | 0             | 0            |
| PVX_085620 | 1           | 0             | 0            |

| GeneID     | Pvalue      | BackGroundPre | BackGroundDx |
|------------|-------------|---------------|--------------|
| PVX_085625 | 0.000125309 | 0             | 4.364604296  |
| PVX_085630 | 0.036687443 | 0             | 1.078349727  |
| PVX_085635 | 0.359317338 | 0             | 0.263637902  |
| PVX_085640 | 0.078805602 | 0             | 0.689672189  |
| PVX_085645 | 0.007054102 | 0             | 1.781469157  |
| PVX_085650 | 1           | 0             | 0            |
| PVX_085655 | 0.078805602 | 0             | 1.284888364  |
| PVX_085660 | 0.078805602 | 0             | 0.976059447  |
| PVX_085665 | 0.000125309 | 0             | 4.004952406  |
| PVX_085670 | 0.166224591 | 0             | 0.367591531  |
| PVX_085675 | 0.036687443 | 0             | 0.857777502  |
| PVX_085680 | 0.001084333 | 0             | 2.466670071  |
| PVX_085685 | 0.002855585 | 0             | 2.747592387  |
| PVX_085690 | 0.016473156 | 0             | 2.135202243  |
| PVX_085695 | 0.166224591 | 0             | 0.592487719  |
| PVX_085700 | 0.036687443 | 0             | 1.631759819  |
| PVX_085705 | 0.036687443 | 0             | 1.178952505  |
| PVX_085710 | 0.007054102 | 0             | 2.491132699  |
| PVX_085715 | 0.036687443 | 0             | 0.944111339  |
| PVX_085720 | 0.002855585 | 0             | 2.743982702  |
| PVX_085725 | 0.016473156 | 0             | 1.055639726  |
| PVX_085730 | 0.000125309 | 0             | 4.803854641  |
| PVX_085735 | 1.03E-05    | 0             | 6.696945944  |
| PVX_085740 | 0.007054102 | 0             | 2.380679194  |
| PVX_085745 | 0.016473156 | 0             | 1.355706086  |
| PVX_085750 | 0.007054102 | 0             | 2.478126935  |
| PVX_085755 | 0.007054102 | 0             | 2.164854629  |
| PVX_085760 | 0.016473156 | 0             | 1.661297202  |
| PVX_085765 | 0.359317338 | 0             | 0.147827483  |
| PVX_085770 | 0.359317338 | 0             | 0.300108463  |
| PVX_085775 | 0.359317338 | 0             | 0.346145801  |
| PVX_085780 | 0.016473156 | 0             | 1.410439703  |
| PVX_085785 | 0.359317338 | 0             | 0.429396638  |
| PVX_085790 | 1           | 0             | 0            |
| PVX_085795 | 1           | 0             | 0            |
| PVX_085800 | 1           | 0             | 0            |
| PVX_085810 | 0.166224591 | 0             | 0.583037926  |
| PVX_085815 | 0.016473156 | 0             | 1.848086154  |
| PVX_085820 | 0.016473156 | 0             | 1.290795787  |
| PVX_085825 | 0.007054102 | 0             | 1.818531345  |
| PVX_085830 | 0.016473156 | 0             | 1.796994101  |

| GeneID     | Pvalue      | BackGroundPre | BackGroundDx |
|------------|-------------|---------------|--------------|
| PVX_085835 | 0.002855585 | 0             | 1.651749364  |
| PVX_085840 | 0.001084333 | 0             | 3.760244938  |
| PVX_085845 | 0.359317338 | 0             | 0.406377057  |
| PVX_085850 | 0.001084333 | 0             | 2.506746585  |
| PVX_085855 | 0.166224591 | 0             | 0.363754965  |
| PVX_085860 | 0.166224591 | 0             | 0.642647609  |
| PVX_085865 | 0.036687443 | 0             | 1.424240147  |
| PVX_085870 | 0.002855585 | 0             | 2.421330556  |
| PVX_085875 | 0.166224591 | 0             | 0.461281013  |
| PVX_085877 | 0.007054102 | 0             | 1.691453521  |
| PVX_085880 | 0.016473156 | 0             | 1.078752489  |
| PVX_085885 | 0.078805602 | 0             | 1.146032893  |
| PVX_085890 | 0.036687443 | 0             | 1.189870743  |
| PVX_085895 | 0.016473156 | 0             | 1.635079059  |
| PVX_085900 | 0.036687443 | 0             | 0.996880972  |
| PVX_085905 | 0.002855585 | 0             | 2.37999569   |
| PVX_085910 | 1           | 0             | 0            |
| PVX_085915 | 0.036687443 | 0             | 1.228807833  |
| PVX_085920 | 3.76E-05    | 0             | 4.755301476  |
| PVX_085925 | 1           | 0             | 0            |
| PVX_085930 | 0.359317338 | 0             | 0.330918015  |
| PVX_085935 | 0.001084333 | 0             | 1.607807365  |
| PVX_085940 | 0.002855585 | 0             | 2.245734508  |
| PVX_085945 | 1           | 0             | 0            |
| PVX_085950 | 0.007054102 | 0             | 2.481570423  |
| PVX_085955 | 0.002855585 | 0             | 2.181966329  |
| PVX_085960 | 0.036687443 | 0             | 1.607284729  |
| PVX_085965 | 0.016473156 | 0             | 1.477548933  |
| PVX_085970 | 3.76E-05    | 0             | 3.801923425  |
| PVX_085975 | 0.036687443 | 0             | 1.220784094  |
| PVX_085977 | 0.016473156 | 0             | 1.31454075   |
| PVX_085980 | 0.359317338 | 0             | 0.377037611  |
| PVX_085985 | 0.001084333 | 0             | 3.17202776   |
| PVX_085990 | 0.007054102 | 0             | 2.580223599  |
| PVX_085995 | 0.007054102 | 0             | 1.737929032  |
| PVX_086000 | 0.016473156 | 0             | 1.73597183   |
| PVX_086005 | 0.166224591 | 0             | 0.740608263  |
| PVX_086010 | 1           | 0             | 0            |
| PVX_086015 | 3.76E-05    | 0             | 2.372260289  |
| PVX_086020 | 3.76E-05    | 0             | 6.254312741  |
| PVX_086022 | 0.078805602 | 0             | 1.326196838  |

| GeneID     | Pvalue      | BackGroundPre | BackGroundDx |
|------------|-------------|---------------|--------------|
| PVX_086025 | 0.001084333 | 0             | 2.485050957  |
| PVX_086030 | 1           | 0             | 0            |
| PVX_086035 | 0.036687443 | 0             | 1.038576029  |
| PVX_086040 | 0.166224591 | 0             | 0.74351249   |
| PVX_086045 | 1           | 0             | 0            |
| PVX_086050 | 0.166224591 | 0             | 0.310681502  |
| PVX_086055 | 0.078805602 | 0             | 1.433991583  |
| PVX_086060 | 0.166224591 | 0             | 0.954447733  |
| PVX_086065 | 0.001084333 | 0             | 3.309406424  |
| PVX_086070 | 0.359317338 | 0             | 0.282831784  |
| PVX_086075 | 0.001084333 | 0             | 3.346665605  |
| PVX_086080 | 0.166224591 | 0             | 0.436532103  |
| PVX_086085 | 0.036687443 | 0             | 1.285615169  |
| PVX_086090 | 0.078805602 | 0             | 1.077017517  |
| PVX_086095 | 0.036687443 | 0             | 1.576316784  |
| PVX_086100 | 0.007054102 | 0             | 1.399643789  |
| PVX_086105 | 0.036687443 | 0             | 1.098239982  |
| PVX_086110 | 0.002855585 | 0             | 2.466789295  |
| PVX_086115 | 0.036687443 | 0             | 1.24314759   |
| PVX_086120 | 1.03E-05    | 0             | 3.759867075  |
| PVX_086125 | 0.007054102 | 0             | 1.60884847   |
| PVX_086130 | 0.007054102 | 0             | 2.171260758  |
| PVX_086135 | 0.359317338 | 0             | 0.178797387  |
| PVX_086140 | 0.007054102 | 0             | 1.935911115  |
| PVX_086145 | 0.002855585 | 0             | 2.273390481  |
| PVX_086150 | 0.359317338 | 0             | 0.234077223  |
| PVX_086155 | 0.001084333 | 0             | 3.294866647  |
| PVX_086160 | 0.000383392 | 0             | 3.115432055  |
| PVX_086165 | 0.007054102 | 0             | 1.65369259   |
| PVX_086170 | 0.002855585 | 0             | 2.167744045  |
| PVX_086175 | 1           | 0             | 0            |
| PVX_086180 | 0.007054102 | 0             | 1.710900308  |
| PVX_086185 | 0.001084333 | 0             | 2.899047451  |
| PVX_086190 | 0.036687443 | 0             | 1.604660074  |
| PVX_086195 | 0.001084333 | 0             | 2.857686387  |
| PVX_086200 | 1           | 0             | 0            |
| PVX_086205 | 0.359317338 | 0             | 0.340803488  |
| PVX_086210 | 0.002855585 | 0             | 2.519034326  |
| PVX_086215 | 0.166224591 | 0             | 0.703224753  |
| PVX_086220 | 0.166224591 | 0             | 0.733016427  |
| PVX_086225 | 1           | 0             | 0            |



| GeneID     | Pvalue      | BackGroundPre | BackGroundDx |
|------------|-------------|---------------|--------------|
| PVX_086230 | 0.036687443 | 0             | 1.713631883  |
| PVX_086235 | 0.007054102 | 0             | 2.24435494   |
| PVX_086240 | 0.000125309 | 0             | 4.514951341  |
| PVX_086245 | 0.359317338 | 0             | 0.133902209  |
| PVX_086250 | 0.166224591 | 0             | 0.545752207  |
| PVX_086255 | 1           | 0             | 0            |
| PVX_086260 | 0.359317338 | 0             | 0.340407641  |
| PVX_086265 | 0.359317338 | 0             | 0.197919665  |
| PVX_086268 | 1           | 0             | 0            |
| PVX_086272 | 0.359317338 | 0             | 0.255238172  |
| PVX_086275 | 0.359317338 | 0             | 0.276147311  |
| PVX_086280 | 1           | 0             | 0            |
| PVX_086285 | 0.166224591 | 0             | 0.494564014  |
| PVX_086290 | 0.007054102 | 0             | 1.389495665  |
| PVX_086295 | 0.016473156 | 0             | 1.741017234  |
| PVX_086305 | 0.000125309 | 0             | 5.362347749  |
| PVX_086310 | 1           | 0             | 0            |
| PVX_086315 | 0.000383392 | 0             | 3.206041309  |
| PVX_086320 | 1           | 0             | 0            |
| PVX_086325 | 0.036687443 | 0             | 0.956782166  |
| PVX_086330 | 0.000383392 | 0             | 3.440774568  |
| PVX_086335 | 0.166224591 | 0             | 0.617629572  |
| PVX_086340 | 0.002855585 | 0             | 2.527188004  |
| PVX_086345 | 1           | 0             | 0            |
| PVX_086350 | 1           | 0             | 0            |
| PVX_086845 | 1           | 0             | 0            |
| PVX_086850 | 1           | 0             | 0            |
| PVX_086855 | 0.036687443 | 0             | 1.008943521  |
| PVX_086860 | 1           | 0             | 0            |
| PVX_086863 | 1           | 0             | 0            |
| PVX_086865 | 1           | 0             | 0            |
| PVX_086870 | 1           | 0             | 0            |
| PVX_086875 | 1           | 0             | 0            |
| PVX_086880 | 1           | 0             | 0            |
| PVX_086890 | 0.016473156 | 0             | 1.63330088   |
| PVX_086893 | 0.359317338 | 0             | 0.238654721  |
| PVX_086895 | 1           | 0             | 0            |
| PVX_086900 | 0.007054102 | 0             | 2.140513377  |
| PVX_086903 | 1           | 0             | 0            |
| PVX_086905 | 1.03E-05    | 0             | 6.0784156    |
| PVX_086910 | 0.166224591 | 0             | 0.731257785  |

| GeneID     | Pvalue      | BackGroundPre | BackGroundDx |
|------------|-------------|---------------|--------------|
| PVX_086915 | 0.007054102 | 0             | 2.620491448  |
| PVX_086920 | 1           | 0             | 0            |
| PVX_086925 | 0.166224591 | 0             | 0.640795936  |
| PVX_086930 | 0.359317338 | 0             | 0.266126416  |
| PVX_086935 | 0.359317338 | 0             | 0.412280738  |
| PVX_086940 | 0.002855585 | 0             | 2.22903699   |
| PVX_086945 | 1           | 0             | 0            |
| PVX_086950 | 1           | 0             | 0            |
| PVX_086955 | 0.166224591 | 0             | 0.888086898  |
| PVX_086960 | 0.078805602 | 0             | 0.694555648  |
| PVX_086962 | 0.359317338 | 0             | 0.510898395  |
| PVX_086965 | 0.016473156 | 0             | 2.33314499   |
| PVX_086970 | 0.359317338 | 0             | 0.270784399  |
| PVX_086975 | 0.359317338 | 0             | 0.260022886  |
| PVX_086980 | 0.002855585 | 0             | 2.737979624  |
| PVX_086985 | 0.359317338 | 0             | 0.372677604  |
| PVX_086990 | 0.002855585 | 0             | 3.033133493  |
| PVX_086995 | 0.007054102 | 0             | 2.561886235  |
| PVX_087000 | 0.078805602 | 0             | 1.411810781  |
| PVX_087005 | 0.078805602 | 0             | 1.213505233  |
| PVX_087010 | 0.002855585 | 0             | 2.364998335  |
| PVX_087015 | 0.078805602 | 0             | 0.848552056  |
| PVX_087020 | 0.036687443 | 0             | 1.505436698  |
| PVX_087025 | 0.016473156 | 0             | 1.780982766  |
| PVX_087030 | 0.002855585 | 0             | 2.968352331  |
| PVX_087035 | 0.000383392 | 0             | 3.699993497  |
| PVX_087040 | 0.016473156 | 0             | 1.228850981  |
| PVX_087042 | 0.078805602 | 0             | 1.238535984  |
| PVX_087044 | 0.166224591 | 0             | 0.542536908  |
| PVX_087045 | 0.007054102 | 0             | 2.421021563  |
| PVX_087050 | 0.078805602 | 0             | 0.74687258   |
| PVX_087055 | 0.078805602 | 0             | 0.834554385  |
| PVX_087060 | 1           | 0             | 0            |
| PVX_087065 | 0.000383392 | 0             | 3.051072455  |
| PVX_087070 | 0.016473156 | 0             | 1.315882245  |
| PVX_087075 | 0.036687443 | 0             | 1.553107676  |
| PVX_087080 | 0.166224591 | 0             | 0.664924182  |
| PVX_087085 | 0.016473156 | 0             | 1.461571244  |
| PVX_087090 | 0.000383392 | 0             | 3.460460005  |
| PVX_087095 | 3.76E-05    | 0             | 5.244021956  |
| PVX_087105 | 0.078805602 | 0             | 0.79244934   |

| GeneID     | Pvalue      | BackGroundPre | BackGroundDx |
|------------|-------------|---------------|--------------|
| PVX_087107 | 0.359317338 | 0             | 0.423421891  |
| PVX_087110 | 0.359317338 | 0             | 0.284035654  |
| PVX_087115 | 0.000383392 | 0             | 3.894987666  |
| PVX_087120 | 0.001084333 | 0             | 2.508046508  |
| PVX_087125 | 1           | 0             | 0            |
| PVX_087130 | 0.016473156 | 0             | 1.64428897   |
| PVX_087135 | 0.000383392 | 0             | 3.666122957  |
| PVX_087140 | 0.002855585 | 0             | 2.577143097  |
| PVX_087143 | 0.016473156 | 0             | 2.186982947  |
| PVX_087145 | 0.001084333 | 0             | 2.603065436  |
| PVX_087150 | 0.078805602 | 0             | 1.07564624   |
| PVX_087155 | 0.036687443 | 0             | 0.991253132  |
| PVX_087160 | 0.166224591 | 0             | 0.694954064  |
| PVX_087165 | 1           | 0             | 0            |
| PVX_087665 | 0.000383392 | 0             | 3.538337648  |
| PVX_087670 | 0.002855585 | 0             | 3.152731093  |
| PVX_087675 | 3.76E-05    | 0             | 4.582990228  |
| PVX_087680 | 1           | 0             | 0            |
| PVX_087682 | 1           | 0             | 0            |
| PVX_087684 | 1           | 0             | 0            |
| PVX_087685 | 0.007054102 | 0             | 2.208149062  |
| PVX_087690 | 0.166224591 | 0             | 0.406822053  |
| PVX_087695 | 0.359317338 | 0             | 0.436689586  |
| PVX_087700 | 0.036687443 | 0             | 1.045281124  |
| PVX_087705 | 0.078805602 | 0             | 1.29999572   |
| PVX_087710 | 0.007054102 | 0             | 2.019316481  |
| PVX_087715 | 0.166224591 | 0             | 0.301947008  |
| PVX_087720 | 1           | 0             | 0            |
| PVX_087725 | 0.016473156 | 0             | 2.154943426  |
| PVX_087730 | 0.078805602 | 0             | 0.653190784  |
| PVX_087735 | 0.000383392 | 0             | 2.178609891  |
| PVX_087740 | 0.007054102 | 0             | 1.411519072  |
| PVX_087745 | 0.166224591 | 0             | 0.238407657  |
| PVX_087750 | 0.007054102 | 0             | 1.77722346   |
| PVX_087755 | 0.078805602 | 0             | 0.685976008  |
| PVX_087760 | 0.016473156 | 0             | 1.32907076   |
| PVX_087765 | 0.166224591 | 0             | 0.455079199  |
| PVX_087775 | 0.001084333 | 0             | 1.558868213  |
| PVX_087780 | 0.036687443 | 0             | 0.921111429  |
| PVX_087785 | 0.078805602 | 0             | 0.640761439  |
| PVX_087790 | 0.007054102 | 0             | 2.202244837  |

| GeneID     | Pvalue      | BackGroundPre | BackGroundDx |
|------------|-------------|---------------|--------------|
| PVX_087795 | 0.000383392 | 0             | 2.586620175  |
| PVX_087800 | 0.078805602 | 0             | 0.746715918  |
| PVX_087802 | 0.078805602 | 0             | 0.83236246   |
| PVX_087805 | 0.078805602 | 0             | 0.814713107  |
| PVX_087810 | 0.016473156 | 0             | 1.547098929  |
| PVX_087815 | 0.002855585 | 0             | 1.558350619  |
| PVX_087820 | 0.007054102 | 0             | 1.818155667  |
| PVX_087825 | 0.036687443 | 0             | 2.809236279  |
| PVX_087830 | 1           | 0             | 0            |
| PVX_087835 | 0.001084333 | 0             | 3.675491454  |
| PVX_087840 | 3.76E-05    | 0             | 3.798294378  |
| PVX_087845 | 0.002855585 | 0             | 1.945467855  |
| PVX_087851 | 0.166224591 | 0             | 0.965431751  |
| PVX_087855 | 0.359317338 | 0             | 0.398870099  |
| PVX_087860 | 0.000383392 | 0             | 5.439211849  |
| PVX_087865 | 0.036687443 | 0             | 1.089926373  |
| PVX_087870 | 0.078805602 | 0             | 1.023898225  |
| PVX_087875 | 1           | 0             | 0            |
| PVX_087876 | 1           | 0             | 0            |
| PVX_087877 | 1           | 0             | 0            |
| PVX_087878 | 1           | 0             | 0            |
| PVX_087879 | 1           | 0             | 0            |
| PVX_087880 | 0.016473156 | 0             | 1.084731415  |
| PVX_087885 | 0.359317338 | 0             | 0.235132762  |
| PVX_087895 | 0.002855585 | 0             | 2.374110584  |
| PVX_087900 | 0.036687443 | 0             | 0.881489747  |
| PVX_087905 | 0.078805602 | 0             | 1.122298678  |
| PVX_087910 | 0.016473156 | 0             | 1.530738616  |
| PVX_087915 | 0.002855585 | 0             | 2.148338327  |
| PVX_087920 | 0.001084333 | 0             | 3.642944293  |
| PVX_087925 | 0.166224591 | 0             | 0.580494694  |
| PVX_087930 | 0.007054102 | 0             | 2.277435673  |
| PVX_087935 | 0.166224591 | 0             | 1.151782902  |
| PVX_087940 | 0.166224591 | 0             | 0.380726655  |
| PVX_087945 | 0.000383392 | 0             | 3.46550786   |
| PVX_087950 | 1.03E-05    | 0             | 7.118567536  |
| PVX_087955 | 0.002855585 | 0             | 2.15968508   |
| PVX_087960 | 0.359317338 | 0             | 0.274978055  |
| PVX_087965 | 0.016473156 | 0             | 1.78265418   |
| PVX_087970 | 1.03E-05    | 0             | 5.349212726  |
| PVX_087975 | 0.016473156 | 0             | 2.034437937  |

| GeneID     | Pvalue      | BackGroundPre | BackGroundDx |
|------------|-------------|---------------|--------------|
| PVX_087980 | 0.016473156 | 0             | 1.741922738  |
| PVX_087985 | 0.002855585 | 0             | 2.101474096  |
| PVX_087990 | 0.166224591 | 0             | 0.570525031  |
| PVX_087995 | 0.002855585 | 0             | 1.609333094  |
| PVX_088000 | 0.000383392 | 0             | 2.579567641  |
| PVX_088005 | 0.166224591 | 0             | 0.762275047  |
| PVX_088007 | 0.002855585 | 0             | 2.071842221  |
| PVX_088010 | 0.002855585 | 0             | 2.241927679  |
| PVX_088015 | 0.036687443 | 0             | 1.412733806  |
| PVX_088020 | 0.359317338 | 0             | 0.393391817  |
| PVX_088025 | 0.036687443 | 0             | 0.778873089  |
| PVX_088035 | 0.036687443 | 0             | 0.846182278  |
| PVX_088040 | 0.036687443 | 0             | 1.204355116  |
| PVX_088045 | 0.359317338 | 0             | 0.114192906  |
| PVX_088050 | 0.036687443 | 0             | 1.543063716  |
| PVX_088055 | 0.036687443 | 0             | 1.431803982  |
| PVX_088060 | 0.016473156 | 0             | 2.001624178  |
| PVX_088065 | 1.03E-05    | 0             | 6.304718076  |
| PVX_088070 | 0.002855585 | 0             | 2.79680668   |
| PVX_088075 | 0.002855585 | 0             | 2.397546786  |
| PVX_088080 | 0.166224591 | 0             | 0.827391211  |
| PVX_088085 | 0.007054102 | 0             | 1.492797172  |
| PVX_088090 | 0.007054102 | 0             | 2.738418035  |
| PVX_088095 | 0.078805602 | 0             | 0.729348128  |
| PVX_088100 | 0.036687443 | 0             | 1.370228751  |
| PVX_088105 | 0.001084333 | 0             | 3.023121368  |
| PVX_088110 | 0.036687443 | 0             | 1.358331463  |
| PVX_088115 | 0.002855585 | 0             | 3.364963849  |
| PVX_088120 | 0.001084333 | 0             | 2.726828222  |
| PVX_088125 | 1           | 0             | 0            |
| PVX_088130 | 0.007054102 | 0             | 1.661530306  |
| PVX_088140 | 0.036687443 | 0             | 1.270894525  |
| PVX_088145 | 0.002855585 | 0             | 2.899153382  |
| PVX_088150 | 0.002855585 | 0             | 2.823733605  |
| PVX_088155 | 0.359317338 | 0             | 0.21801833   |
| PVX_088165 | 0.001084333 | 0             | 2.612348319  |
| PVX_088170 | 0.002855585 | 0             | 3.154959352  |
| PVX_088175 | 0.002855585 | 0             | 2.967900559  |
| PVX_088180 | 0.007054102 | 0             | 2.73137485   |
| PVX_088185 | 0.002855585 | 0             | 2.568796209  |
| PVX_088190 | 0.007054102 | 0             | 1.389272735  |

| GeneID     | Pvalue      | BackGroundPre | BackGroundDx |
|------------|-------------|---------------|--------------|
| PVX_088195 | 0.036687443 | 0             | 1.439006303  |
| PVX_088200 | 0.007054102 | 0             | 1.982185008  |
| PVX_088205 | 0.002855585 | 0             | 2.517223172  |
| PVX_088210 | 0.166224591 | 0             | 0.622568847  |
| PVX_088215 | 0.002855585 | 0             | 1.81740072   |
| PVX_088220 | 0.002855585 | 0             | 2.260265794  |
| PVX_088225 | 0.002855585 | 0             | 2.273356427  |
| PVX_088230 | 0.359317338 | 0             | 0.380283058  |
| PVX_088235 | 0.016473156 | 0             | 1.374177969  |
| PVX_088240 | 0.359317338 | 0             | 0.254535075  |
| PVX_088245 | 0.359317338 | 0             | 0.32534097   |
| PVX_088250 | 0.016473156 | 0             | 1.441626709  |
| PVX_088254 | 0.007054102 | 0             | 1.95511001   |
| PVX_088256 | 1           | 0             | 0            |
| PVX_088265 | 0.166224591 | 0             | 0.576832584  |
| PVX_088270 | 0.007054102 | 0             | 2.104960662  |
| PVX_088275 | 0.016473156 | 0             | 1.112476308  |
| PVX_088280 | 0.036687443 | 0             | 1.441068285  |
| PVX_088775 | 1           | 0             | 0            |
| PVX_088780 | 0.359317338 | 0             | 0.280587006  |
| PVX_088790 | 0.359317338 | 0             | 0.350097001  |
| PVX_088795 | 0.166224591 | 0             | 0.563926955  |
| PVX_088797 | 1           | 0             | 0            |
| PVX_088798 | 1           | 0             | 0            |
| PVX_088800 | 1           | 0             | 0            |
| PVX_088805 | 1           | 0             | 0            |
| PVX_088810 | 1           | 0             | 0            |
| PVX_088815 | 0.036687443 | 0             | 1.338406387  |
| PVX_088820 | 0.007054102 | 0             | 2.23831195   |
| PVX_088825 | 1           | 0             | 0            |
| PVX_088830 | 0.000383392 | 0             | 4.043368189  |
| PVX_088835 | 0.359317338 | 0             | 0.423861872  |
| PVX_088840 | 0.078805602 | 0             | 1.071430233  |
| PVX_088845 | 1           | 0             | 0            |
| PVX_088850 | 0.166224591 | 0             | 0.598898359  |
| PVX_088855 | 0.001084333 | 0             | 3.7798988    |
| PVX_088860 | 0.359317338 | 0             | 0.343048375  |
| PVX_088865 | 0.001084333 | 0             | 4.256544482  |
| PVX_088870 | 1           | 0             | 0            |
| PVX_088875 | 1           | 0             | 0            |
| PVX_088880 | 0.036687443 | 0             | 1.376439285  |

| GeneID     | Pvalue      | BackGroundPre | BackGroundDx |
|------------|-------------|---------------|--------------|
| PVX_088885 | 0.166224591 | 0             | 0.762236037  |
| PVX_088890 | 0.036687443 | 0             | 1.527576666  |
| PVX_088895 | 0.016473156 | 0             | 2.085838961  |
| PVX_088905 | 0.007054102 | 0             | 1.378203855  |
| PVX_088907 | 1           | 0             | 0            |
| PVX_088910 | 1           | 0             | 0            |
| PVX_088915 | 1           | 0             | 0            |
| PVX_088920 | 1           | 0             | 0            |
| PVX_088930 | 0.036687443 | 0             | 1.372355332  |
| PVX_088935 | 0.007054102 | 0             | 1.906917049  |
| PVX_088940 | 0.016473156 | 0             | 1.348432665  |
| PVX_088945 | 0.016473156 | 0             | 1.371354641  |
| PVX_088950 | 0.016473156 | 0             | 1.536708351  |
| PVX_088955 | 1           | 0             | 0            |
| PVX_088960 | 3.76E-05    | 0             | 5.274602363  |
| PVX_088965 | 0.000125309 | 0             | 2.970193998  |
| PVX_088970 | 1           | 0             | 0            |
| PVX_088975 | 0.001084333 | 0             | 2.45625555   |
| PVX_088985 | 0.000383392 | 0             | 3.499229002  |
| PVX_088990 | 0.359317338 | 0             | 0.521809896  |
| PVX_088995 | 0.036687443 | 0             | 1.146828453  |
| PVX_089000 | 0.359317338 | 0             | 0.203375881  |
| PVX_089010 | 0.036687443 | 0             | 0.807700648  |
| PVX_089015 | 0.002855585 | 0             | 1.962876921  |
| PVX_089020 | 1           | 0             | 0            |
| PVX_089025 | 1.03E-05    | 0             | 6.845406967  |
| PVX_089030 | 0.002855585 | 0             | 2.792616898  |
| PVX_089035 | 0.002855585 | 0             | 2.441407747  |
| PVX_089040 | 0.002855585 | 0             | 2.934000321  |
| PVX_089045 | 0.078805602 | 0             | 0.785831481  |
| PVX_089050 | 0.036687443 | 0             | 1.349684549  |
| PVX_089055 | 0.000125309 | 0             | 2.396687787  |
| PVX_089060 | 0.016473156 | 0             | 1.246924003  |
| PVX_089065 | 0.016473156 | 0             | 1.551783269  |
| PVX_089070 | 0.359317338 | 0             | 0.259683013  |
| PVX_089075 | 1           | 0             | 0            |
| PVX_089080 | 0.359317338 | 0             | 0.467605726  |
| PVX_089085 | 0.002855585 | 0             | 2.203174924  |
| PVX_089087 | 0.166224591 | 0             | 0.894009314  |
| PVX_089090 | 0.016473156 | 0             | 2.182218626  |
| PVX_089095 | 0.359317338 | 0             | 0.37958679   |

| GeneID     | Pvalue      | BackGroundPre | BackGroundDx |
|------------|-------------|---------------|--------------|
| PVX_089105 | 1           | 0             | 0            |
| PVX_089110 | 0.002855585 | 0             | 1.629905139  |
| PVX_089115 | 0.036687443 | 0             | 1.0930611    |
| PVX_089120 | 0.007054102 | 0             | 1.38246486   |
| PVX_089125 | 0.016473156 | 0             | 1.645756003  |
| PVX_089130 | 0.078805602 | 0             | 0.94857843   |
| PVX_089135 | 0.036687443 | 0             | 1.466682848  |
| PVX_089140 | 0.007054102 | 0             | 2.109103952  |
| PVX_089145 | 0.016473156 | 0             | 1.352802669  |
| PVX_089150 | 0.000383392 | 0             | 2.846643557  |
| PVX_089155 | 0.036687443 | 0             | 1.277193853  |
| PVX_089160 | 0.359317338 | 0             | 0.226765847  |
| PVX_089165 | 0.007054102 | 0             | 2.377085741  |
| PVX_089170 | 0.001084333 | 0             | 3.124511318  |
| PVX_089175 | 0.007054102 | 0             | 2.880548217  |
| PVX_089180 | 0.166224591 | 0             | 0.646084421  |
| PVX_089185 | 1           | 0             | 0            |
| PVX_089195 | 0.359317338 | 0             | 0.447645753  |
| PVX_089200 | 0.002855585 | 0             | 2.02985704   |
| PVX_089205 | 0.016473156 | 0             | 1.992757645  |
| PVX_089210 | 0.036687443 | 0             | 1.489591666  |
| PVX_089215 | 0.078805602 | 0             | 0.748409261  |
| PVX_089220 | 0.166224591 | 0             | 0.468205775  |
| PVX_089225 | 0.000125309 | 0             | 4.194958123  |
| PVX_089230 | 1           | 0             | 0            |
| PVX_089235 | 0.001084333 | 0             | 2.889647704  |
| PVX_089240 | 1           | 0             | 0            |
| PVX_089245 | 0.166224591 | 0             | 0.542255273  |
| PVX_089250 | 0.002855585 | 0             | 3.152468233  |
| PVX_089255 | 0.078805602 | 0             | 0.663087951  |
| PVX_089260 | 0.036687443 | 0             | 1.565754552  |
| PVX_089265 | 0.016473156 | 0             | 1.547331452  |
| PVX_089270 | 0.007054102 | 0             | 2.567420697  |
| PVX_089275 | 0.036687443 | 0             | 1.777093736  |
| PVX_089280 | 3.76E-05    | 0             | 6.108499345  |
| PVX_089285 | 0.007054102 | 0             | 1.679922017  |
| PVX_089290 | 0.166224591 | 0             | 0.549232378  |
| PVX_089292 | 0.166224591 | 0             | 0.927021927  |
| PVX_089295 | 0.007054102 | 0             | 1.946626674  |
| PVX_089300 | 0.359317338 | 0             | 0.421915086  |
| PVX_089305 | 0.166224591 | 0             | 0.626546968  |



| GeneID     | Pvalue      | BackGroundPre | BackGroundDx |
|------------|-------------|---------------|--------------|
| PVX_089310 | 0.359317338 | 0             | 0.265441185  |
| PVX_089315 | 0.016473156 | 0             | 1.346652743  |
| PVX_089320 | 0.001084333 | 0             | 2.525110457  |
| PVX_089325 | 0.002855585 | 0             | 2.174790691  |
| PVX_089330 | 0.359317338 | 0             | 0.223186975  |
| PVX_089335 | 0.002855585 | 0             | 1.983802861  |
| PVX_089340 | 0.166224591 | 0             | 0.541102973  |
| PVX_089345 | 0.036687443 | 0             | 1.180763511  |
| PVX_089355 | 0.016473156 | 0             | 1.508748006  |
| PVX_089360 | 0.016473156 | 0             | 1.686922131  |
| PVX_089365 | 0.007054102 | 0             | 1.619996759  |
| PVX_089370 | 0.007054102 | 0             | 2.478221001  |
| PVX_089375 | 0.359317338 | 0             | 0.138516444  |
| PVX_089380 | 1           | 0             | 0            |
| PVX_089385 | 1           | 0             | 0            |
| PVX_089390 | 0.078805602 | 0             | 1.081123401  |
| PVX_089395 | 1           | 0             | 0            |
| PVX_089400 | 0.007054102 | 0             | 1.672619599  |
| PVX_089405 | 0.359317338 | 0             | 0.199637274  |
| PVX_089410 | 0.359317338 | 0             | 0.328351319  |
| PVX_089415 | 0.007054102 | 0             | 1.434952777  |
| PVX_089425 | 3.76E-05    | 0             | 6.46291587   |
| PVX_089430 | 0.007054102 | 0             | 2.065192296  |
| PVX_089435 | 0.007054102 | 0             | 2.039469688  |
| PVX_089440 | 1           | 0             | 0            |
| PVX_089445 | 0.016473156 | 0             | 1.809521985  |
| PVX_089450 | 1           | 0             | 0            |
| PVX_089455 | 0.166224591 | 0             | 0.700465225  |
| PVX_089460 | 1           | 0             | 0            |
| PVX_089465 | 0.166224591 | 0             | 0.595863819  |
| PVX_089467 | 1           | 0             | 0            |
| PVX_089470 | 0.166224591 | 0             | 0.632378828  |
| PVX_089473 | 0.359317338 | 0             | 0.372546994  |
| PVX_089475 | 1           | 0             | 0            |
| PVX_089480 | 0.002855585 | 0             | 2.188995075  |
| PVX_089485 | 0.007054102 | 0             | 2.075152235  |
| PVX_089490 | 0.007054102 | 0             | 2.374960043  |
| PVX_089495 | 0.078805602 | 0             | 1.403658883  |
| PVX_089500 | 1           | 0             | 0            |
| PVX_089505 | 0.002855585 | 0             | 3.112771358  |
| PVX_089510 | 1           | 0             | 0            |

| GeneID     | Pvalue      | BackGroundPre | BackGroundDx |
|------------|-------------|---------------|--------------|
| PVX_089515 | 0.078805602 | 0             | 0.947964927  |
| PVX_089520 | 0.359317338 | 0             | 0.431953758  |
| PVX_089525 | 1           | 0             | 0            |
| PVX_089530 | 0.359317338 | 0             | 0.196786011  |
| PVX_089535 | 0.166224591 | 0             | 0.420811188  |
| PVX_089540 | 0.002855585 | 0             | 3.230069203  |
| PVX_089542 | 0.036687443 | 0             | 1.338903887  |
| PVX_089545 | 0.359317338 | 0             | 0.297313039  |
| PVX_089550 | 0.078805602 | 0             | 0.866625665  |
| PVX_089555 | 0.016473156 | 0             | 1.396638202  |
| PVX_089560 | 0.007054102 | 0             | 2.144052484  |
| PVX_089565 | 0.036687443 | 0             | 1.365192859  |
| PVX_089570 | 0.359317338 | 0             | 0.258299723  |
| PVX_089575 | 0.166224591 | 0             | 0.792537979  |
| PVX_089580 | 0.001084333 | 0             | 3.224410763  |
| PVX_089585 | 0.359317338 | 0             | 0.51226456   |
| PVX_089590 | 0.036687443 | 0             | 1.518076581  |
| PVX_089592 | 0.359317338 | 0             | 0.177824814  |
| PVX_089595 | 0.036687443 | 0             | 1.617064288  |
| PVX_089600 | 0.078805602 | 0             | 1.107157017  |
| PVX_089605 | 0.002855585 | 0             | 2.70213403   |
| PVX_089610 | 0.359317338 | 0             | 0.200148219  |
| PVX_089615 | 0.016473156 | 0             | 1.193196739  |
| PVX_089620 | 0.036687443 | 0             | 1.347054767  |
| PVX_089625 | 0.000383392 | 0             | 4.006218891  |
| PVX_089630 | 0.166224591 | 0             | 0.61396945   |
| PVX_089632 | 0.016473156 | 0             | 2.239506056  |
| PVX_089635 | 0.016473156 | 0             | 2.126032907  |
| PVX_089640 | 0.000125309 | 0             | 4.462351908  |
| PVX_089645 | 0.016473156 | 0             | 1.435480424  |
| PVX_089650 | 0.078805602 | 0             | 0.983537377  |
| PVX_089655 | 0.002855585 | 0             | 2.295866996  |
| PVX_089660 | 0.016473156 | 0             | 1.598833432  |
| PVX_089665 | 0.078805602 | 0             | 0.637664593  |
| PVX_089667 | 1           | 0             | 0            |
| PVX_089670 | 1           | 0             | 0            |
| PVX_089675 | 0.036687443 | 0             | 1.313221069  |
| PVX_089680 | 0.166224591 | 0             | 0.663520119  |
| PVX_089685 | 1           | 0             | 0            |
| PVX_089690 | 0.036687443 | 0             | 1.260884348  |
| PVX_089695 | 1           | 0             | 0            |

| GeneID     | Pvalue      | BackGroundPre | BackGroundDx |
|------------|-------------|---------------|--------------|
| PVX_089700 | 1           | 0             | 0            |
| PVX_089705 | 0.007054102 | 0             | 2.326139389  |
| PVX_089710 | 0.036687443 | 0             | 1.361496748  |
| PVX_089715 | 0.016473156 | 0             | 1.266238049  |
| PVX_089720 | 0.166224591 | 0             | 0.544025146  |
| PVX_089725 | 0.007054102 | 0             | 2.502039436  |
| PVX_089730 | 0.036687443 | 0             | 1.539058816  |
| PVX_089735 | 0.000383392 | 0             | 3.434913919  |
| PVX_089740 | 0.016473156 | 0             | 1.923267066  |
| PVX_089745 | 0.166224591 | 0             | 0.510497436  |
| PVX_089750 | 3.76E-05    | 0             | 5.718818206  |
| PVX_089755 | 0.078805602 | 0             | 1.005190139  |
| PVX_089760 | 0.166224591 | 0             | 0.575121698  |
| PVX_089765 | 0.001084333 | 0             | 3.348723754  |
| PVX_089770 | 0.359317338 | 0             | 0.296018599  |
| PVX_089775 | 0.016473156 | 0             | 1.909390155  |
| PVX_089780 | 0.078805602 | 0             | 1.399940729  |
| PVX_089785 | 1           | 0             | 0            |
| PVX_089790 | 0.036687443 | 0             | 1.206014826  |
| PVX_089795 | 0.359317338 | 0             | 0.318417515  |
| PVX_089800 | 1           | 0             | 0            |
| PVX_089805 | 0.036687443 | 0             | 1.691007735  |
| PVX_089810 | 0.007054102 | 0             | 2.672131184  |
| PVX_089815 | 1           | 0             | 0            |
| PVX_089820 | 1           | 0             | 0            |
| PVX_089825 | 0.359317338 | 0             | 0.31062091   |
| PVX_089830 | 0.166224591 | 0             | 0.824510767  |
| PVX_089835 | 1           | 0             | 0            |
| PVX_089840 | 0.016473156 | 0             | 2.132791819  |
| PVX_089845 | 0.078805602 | 0             | 1.114230318  |
| PVX_089850 | 0.002855585 | 0             | 2.554769725  |
| PVX_089852 | 1           | 0             | 0            |
| PVX_089855 | 1           | 0             | 0            |
| PVX_089860 | 0.359317338 | 0             | 0.347074426  |
| PVX_089863 | 0.359317338 | 0             | 0.403837624  |
| PVX_089865 | 0.036687443 | 0             | 1.461010088  |
| PVX_089867 | 0.359317338 | 0             | 0.347074426  |
| PVX_089870 | 0.359317338 | 0             | 0.403837624  |
| PVX_089875 | 1           | 0             | 0            |
| PVX_089880 | 0.078805602 | 0             | 0.862569963  |
| PVX_089885 | 0.359317338 | 0             | 0.404688623  |

| GeneID     | Pvalue      | BackGroundPre | BackGroundDx |
|------------|-------------|---------------|--------------|
| PVX_089890 | 1           | 0             | 0            |
| PVX_089895 | 0.007054102 | 0             | 1.848240695  |
| PVX_089900 | 0.036687443 | 0             | 1.49131314   |
| PVX_089905 | 0.166224591 | 0             | 0.668404743  |
| PVX_089910 | 0.001084333 | 0             | 2.284533235  |
| PVX_089915 | 0.036687443 | 0             | 1.488223168  |
| PVX_089920 | 0.016473156 | 0             | 1.699395047  |
| PVX_089925 | 0.166224591 | 0             | 1.132814591  |
| PVX_089930 | 0.016473156 | 0             | 2.188541663  |
| PVX_089935 | 0.001084333 | 0             | 2.088531389  |
| PVX_089940 | 0.359317338 | 0             | 0.344004846  |
| PVX_089945 | 1           | 0             | 0            |
| PVX_089950 | 0.001084333 | 0             | 2.922744497  |
| PVX_089955 | 0.001084333 | 0             | 2.811987557  |
| PVX_089960 | 0.036687443 | 0             | 0.649928946  |
| PVX_089970 | 0.000383392 | 0             | 3.504259987  |
| PVX_089972 | 0.359317338 | 0             | 0.173803937  |
| PVX_089975 | 0.359317338 | 0             | 0.452251164  |
| PVX_089980 | 0.016473156 | 0             | 1.534966957  |
| PVX_089985 | 0.016473156 | 0             | 1.328294479  |
| PVX_089990 | 0.007054102 | 0             | 1.033739447  |
| PVX_089995 | 0.036687443 | 0             | 0.976145981  |
| PVX_090000 | 0.000125309 | 0             | 4.161471752  |
| PVX_090005 | 0.007054102 | 0             | 1.986841147  |
| PVX_090010 | 0.166224591 | 0             | 0.736405476  |
| PVX_090015 | 0.002855585 | 0             | 3.33525646   |
| PVX_090020 | 0.359317338 | 0             | 0.127850827  |
| PVX_090025 | 0.007054102 | 0             | 1.992245721  |
| PVX_090030 | 0.359317338 | 0             | 0.308652265  |
| PVX_090035 | 0.359317338 | 0             | 0.21631599   |
| PVX_090040 | 0.359317338 | 0             | 0.272040316  |
| PVX_090045 | 0.036687443 | 0             | 1.465767026  |
| PVX_090050 | 0.016473156 | 0             | 2.424335101  |
| PVX_090055 | 0.078805602 | 0             | 0.870512201  |
| PVX_090060 | 0.007054102 | 0             | 1.366838569  |
| PVX_090065 | 0.359317338 | 0             | 0.212142637  |
| PVX_090070 | 1.03E-05    | 0             | 5.297587901  |
| PVX_090075 | 0.166224591 | 0             | 0.55391035   |
| PVX_090080 | 0.016473156 | 0             | 2.035698361  |
| PVX_090085 | 0.000383392 | 0             | 1.687482444  |
| PVX_090090 | 0.036687443 | 0             | 0.88825318   |

| GeneID     | Pvalue      | BackGroundPre | BackGroundDx |
|------------|-------------|---------------|--------------|
| PVX_090095 | 3.76E-05    | 0             | 4.044251439  |
| PVX_090100 | 0.359317338 | 0             | 0.352184791  |
| PVX_090105 | 0.166224591 | 0             | 0.738629733  |
| PVX_090110 | 0.002855585 | 0             | 1.6998585    |
| PVX_090115 | 0.002855585 | 0             | 2.861763645  |
| PVX_090120 | 1           | 0             | 0            |
| PVX_090125 | 0.036687443 | 0             | 1.258049798  |
| PVX_090130 | 0.359317338 | 0             | 0.2159934    |
| PVX_090135 | 1           | 0             | 0            |
| PVX_090137 | 1           | 0             | 0            |
| PVX_090140 | 0.166224591 | 0             | 0.829866091  |
| PVX_090145 | 0.078805602 | 0             | 0.907348779  |
| PVX_090150 | 0.000383392 | 0             | 2.515190664  |
| PVX_090155 | 0.000383392 | 0             | 3.764037812  |
| PVX_090160 | 1.03E-05    | 0             | 6.539043714  |
| PVX_090165 | 0.000383392 | 0             | 2.381581869  |
| PVX_090170 | 0.166224591 | 0             | 0.840365045  |
| PVX_090175 | 0.007054102 | 0             | 2.39328855   |
| PVX_090180 | 0.359317338 | 0             | 0.286905585  |
| PVX_090185 | 0.078805602 | 0             | 1.130864342  |
| PVX_090190 | 0.016473156 | 0             | 1.856944397  |
| PVX_090195 | 0.166224591 | 0             | 0.775007527  |
| PVX_090200 | 0.078805602 | 0             | 1.192073525  |
| PVX_090205 | 1           | 0             | 0            |
| PVX_090210 | 1           | 0             | 0            |
| PVX_090215 | 1           | 0             | 0            |
| PVX_090220 | 0.001084333 | 0             | 2.279008582  |
| PVX_090225 | 0.166224591 | 0             | 0.74199989   |
| PVX_090230 | 1.03E-05    | 0             | 6.982030315  |
| PVX_090235 | 0.359317338 | 0             | 0.339919975  |
| PVX_090240 | 1           | 0             | 0            |
| PVX_090245 | 1           | 0             | 0            |
| PVX_090250 | 0.002855585 | 0             | 2.80622386   |
| PVX_090255 | 0.000125309 | 0             | 4.68643346   |
| PVX_090260 | 0.359317338 | 0             | 0.390042462  |
| PVX_090265 | 0.000383392 | 0             | 3.65011112   |
| PVX_090270 | 0.166224591 | 0             | 0.786299632  |
| PVX_090275 | 0.078805602 | 0             | 0.947279415  |
| PVX_090280 | 0.078805602 | 0             | 1.076072392  |
| PVX_090285 | 0.078805602 | 0             | 0.68833334   |
| PVX_090290 | 0.359317338 | 0             | 0.176637579  |

| GeneID     | Pvalue      | BackGroundPre | BackGroundDx |
|------------|-------------|---------------|--------------|
| PVX_090293 | 0.359317338 | 0             | 0.364107784  |
| PVX_090295 | 1           | 0             | 0            |
| PVX_090300 | 0.359317338 | 0             | 0.359198913  |
| PVX_090305 | 0.016473156 | 0             | 1.53943302   |
| PVX_090310 | 1           | 0             | 0            |
| PVX_090315 | 0.359317338 | 0             | 0.32694506   |
| PVX_090320 | 0.359317338 | 0             | 0.248458881  |
| PVX_090325 | 0.166224591 | 0             | 0.317904123  |
| PVX_090330 | 1           | 0             | 0            |
| PVX_090335 | 0.359317338 | 0             | 0.365028873  |
| PVX_090830 | 0.166224591 | 0             | 0.732893575  |
| PVX_090835 | 1           | 0             | 0            |
| PVX_090840 | 1           | 0             | 0            |
| PVX_090845 | 0.000125309 | 0             | 5.239800137  |
| PVX_090847 | 1           | 0             | 0            |
| PVX_090848 | 1           | 0             | 0            |
| PVX_090850 | 0.078805602 | 0             | 0.814654844  |
| PVX_090860 | 1           | 0             | 0            |
| PVX_090865 | 0.007054102 | 0             | 1.980912301  |
| PVX_090870 | 0.001084333 | 0             | 3.227954065  |
| PVX_090876 | 0.002855585 | 0             | 1.682414812  |
| PVX_090878 | 0.359317338 | 0             | 0.665080357  |
| PVX_090880 | 0.000383392 | 0             | 2.960241891  |
| PVX_090885 | 0.036687443 | 0             | 1.353616323  |
| PVX_090890 | 0.002855585 | 0             | 1.995626041  |
| PVX_090895 | 0.166224591 | 0             | 0.41554439   |
| PVX_090900 | 3.76E-05    | 0             | 5.152751198  |
| PVX_090905 | 0.359317338 | 0             | 0.205751197  |
| PVX_090910 | 1           | 0             | 0            |
| PVX_090915 | 0.016473156 | 0             | 2.394481046  |
| PVX_090920 | 0.078805602 | 0             | 0.999360274  |
| PVX_090925 | 1           | 0             | 0            |
| PVX_090930 | 0.078805602 | 0             | 1.220791837  |
| PVX_090935 | 0.001084333 | 0             | 3.857233881  |
| PVX_090940 | 1           | 0             | 0            |
| PVX_090945 | 0.359317338 | 0             | 0.282133026  |
| PVX_090950 | 1.03E-05    | 0             | 6.755757547  |
| PVX_090955 | 0.166224591 | 0             | 0.760382805  |
| PVX_090960 | 0.016473156 | 0             | 1.770869307  |
| PVX_090965 | 0.001084333 | 0             | 3.140981727  |
| PVX_090970 | 0.016473156 | 0             | 1.761835883  |

| GeneID     | Pvalue      | BackGroundPre | BackGroundDx |
|------------|-------------|---------------|--------------|
| PVX_090972 | 0.359317338 | 0             | 0.434132498  |
| PVX_090975 | 0.002855585 | 0             | 2.604280275  |
| PVX_090980 | 0.016473156 | 0             | 1.69013367   |
| PVX_090985 | 0.002855585 | 0             | 2.742020741  |
| PVX_090990 | 0.166224591 | 0             | 0.618328312  |
| PVX_090995 | 0.359317338 | 0             | 0.326199017  |
| PVX_091000 | 0.001084333 | 0             | 2.143087072  |
| PVX_091005 | 0.001084333 | 0             | 2.560841625  |
| PVX_091010 | 0.036687443 | 0             | 1.085321586  |
| PVX_091015 | 0.016473156 | 0             | 1.255915177  |
| PVX_091020 | 1           | 0             | 0            |
| PVX_091025 | 0.036687443 | 0             | 2.055009618  |
| PVX_091030 | 0.000383392 | 0             | 3.202157407  |
| PVX_091035 | 0.036687443 | 0             | 1.45181711   |
| PVX_091040 | 1.03E-05    | 0             | 4.101859167  |
| PVX_091045 | 0.036687443 | 0             | 1.691085736  |
| PVX_091050 | 0.016473156 | 0             | 2.177669615  |
| PVX_091055 | 0.036687443 | 0             | 1.171136939  |
| PVX_091060 | 0.002855585 | 0             | 2.442621728  |
| PVX_091065 | 0.007054102 | 0             | 1.549040492  |
| PVX_091075 | 1           | 0             | 0            |
| PVX_091080 | 0.001084333 | 0             | 2.6464996    |
| PVX_091085 | 0.359317338 | 0             | 0.174676292  |
| PVX_091090 | 0.016473156 | 0             | 1.960890922  |
| PVX_091092 | 0.078805602 | 0             | 1.434436783  |
| PVX_091095 | 0.001084333 | 0             | 3.193905295  |
| PVX_091100 | 0.007054102 | 0             | 2.487428117  |
| PVX_091105 | 3.76E-05    | 0             | 5.094364781  |
| PVX_091110 | 0.001084333 | 0             | 3.259104213  |
| PVX_091115 | 0.359317338 | 0             | 0.410028819  |
| PVX_091120 | 0.036687443 | 0             | 1.39911496   |
| PVX_091136 | 0.166224591 | 0             | 0.496977008  |
| PVX_091137 | 0.359317338 | 0             | 0.285527952  |
| PVX_091140 | 0.002855585 | 0             | 2.472311931  |
| PVX_091145 | 3.76E-05    | 0             | 5.954106202  |
| PVX_091150 | 0.166224591 | 0             | 0.820150496  |
| PVX_091155 | 0.359317338 | 0             | 0.248985928  |
| PVX_091160 | 0.000383392 | 0             | 2.532816558  |
| PVX_091165 | 0.078805602 | 0             | 1.09985978   |
| PVX_091170 | 3.76E-05    | 0             | 3.974490119  |
| PVX_091175 | 0.002855585 | 0             | 2.026181194  |

| GeneID     | Pvalue      | BackGroundPre | BackGroundDx |
|------------|-------------|---------------|--------------|
| PVX_091180 | 0.078805602 | 0             | 0.999176329  |
| PVX_091185 | 1           | 0             | 0            |
| PVX_091190 | 1           | 0             | 0            |
| PVX_091195 | 0.016473156 | 0             | 1.728350449  |
| PVX_091200 | 0.036687443 | 0             | 1.232911548  |
| PVX_091205 | 0.007054102 | 0             | 2.637567059  |
| PVX_091210 | 0.078805602 | 0             | 1.00654364   |
| PVX_091215 | 0.166224591 | 0             | 0.764644639  |
| PVX_091220 | 0.078805602 | 0             | 1.368921342  |
| PVX_091225 | 1           | 0             | 0            |
| PVX_091230 | 1           | 0             | 0            |
| PVX_091235 | 0.016473156 | 0             | 1.37507077   |
| PVX_091240 | 0.007054102 | 0             | 2.50800055   |
| PVX_091245 | 0.359317338 | 0             | 0.317178715  |
| PVX_091250 | 0.078805602 | 0             | 1.297724741  |
| PVX_091255 | 0.359317338 | 0             | 0.216948195  |
| PVX_091260 | 0.036687443 | 0             | 1.431977813  |
| PVX_091265 | 0.016473156 | 0             | 1.408847451  |
| PVX_091270 | 0.078805602 | 0             | 1.244908471  |
| PVX_091275 | 3.76E-05    | 0             | 4.764883323  |
| PVX_091280 | 0.016473156 | 0             | 1.364557418  |
| PVX_091285 | 0.078805602 | 0             | 0.792600478  |
| PVX_091290 | 0.166224591 | 0             | 0.578537306  |
| PVX_091295 | 0.359317338 | 0             | 0.253886208  |
| PVX_091300 | 0.359317338 | 0             | 0.060736469  |
| PVX_091305 | 0.078805602 | 0             | 1.142536137  |
| PVX_091307 | 0.166224591 | 0             | 1.180034765  |
| PVX_091310 | 0.007054102 | 0             | 2.473204109  |
| PVX_091315 | 0.002855585 | 0             | 2.874145561  |
| PVX_091320 | 0.016473156 | 0             | 1.625199062  |
| PVX_091325 | 0.166224591 | 0             | 0.606228598  |
| PVX_091330 | 0.000383392 | 0             | 3.761905631  |
| PVX_091335 | 0.078805602 | 0             | 0.826033712  |
| PVX_091340 | 0.166224591 | 0             | 0.610693904  |
| PVX_091345 | 1           | 0             | 0            |
| PVX_091350 | 0.359317338 | 0             | 0.294987138  |
| PVX_091355 | 0.002855585 | 0             | 2.267809934  |
| PVX_091360 | 0.036687443 | 0             | 1.182198043  |
| PVX_091365 | 0.166224591 | 0             | 0.682479377  |
| PVX_091370 | 1           | 0             | 0            |
| PVX_091375 | 0.001084333 | 0             | 3.010270993  |



| GeneID     | Pvalue      | BackGroundPre | BackGroundDx |
|------------|-------------|---------------|--------------|
| PVX_091380 | 0.359317338 | 0             | 0.301562444  |
| PVX_091385 | 0.359317338 | 0             | 0.199024107  |
| PVX_091390 | 0.016473156 | 0             | 2.149326396  |
| PVX_091395 | 1           | 0             | 0            |
| PVX_091400 | 1           | 0             | 0            |
| PVX_091405 | 0.007054102 | 0             | 2.261023886  |
| PVX_091410 | 0.000125309 | 0             | 4.21432814   |
| PVX_091415 | 0.000125309 | 0             | 4.300044746  |
| PVX_091420 | 0.166224591 | 0             | 0.697221242  |
| PVX_091425 | 0.000383392 | 0             | 4.31760171   |
| PVX_091430 | 0.359317338 | 0             | 0.275057951  |
| PVX_091434 | 0.359317338 | 0             | 0.237572843  |
| PVX_091436 | 0.001084333 | 0             | 2.280091767  |
| PVX_091440 | 0.036687443 | 0             | 1.811340993  |
| PVX_091445 | 0.078805602 | 0             | 1.429668389  |
| PVX_091450 | 0.000383392 | 0             | 3.595655563  |
| PVX_091455 | 0.036687443 | 0             | 1.504734434  |
| PVX_091460 | 0.036687443 | 0             | 1.135753003  |
| PVX_091465 | 0.007054102 | 0             | 2.205855065  |
| PVX_091470 | 0.007054102 | 0             | 2.213554334  |
| PVX_091475 | 1           | 0             | 0            |
| PVX_091480 | 0.007054102 | 0             | 1.887820133  |
| PVX_091485 | 3.76E-05    | 0             | 4.155431938  |
| PVX_091490 | 0.078805602 | 0             | 0.801528806  |
| PVX_091495 | 0.002855585 | 0             | 3.809899957  |
| PVX_091500 | 0.002855585 | 0             | 2.982097314  |
| PVX_091505 | 0.007054102 | 0             | 1.89513946   |
| PVX_091510 | 0.359317338 | 0             | 0.342636868  |
| PVX_091515 | 0.001084333 | 0             | 4.37751601   |
| PVX_091520 | 1           | 0             | 0            |
| PVX_091525 | 0.036687443 | 0             | 1.32100259   |
| PVX_091530 | 0.016473156 | 0             | 1.068754434  |
| PVX_091535 | 0.359317338 | 0             | 0.365360437  |
| PVX_091540 | 0.078805602 | 0             | 1.302677514  |
| PVX_091545 | 0.000383392 | 0             | 3.464077272  |
| PVX_091550 | 0.002855585 | 0             | 2.420928677  |
| PVX_091555 | 0.078805602 | 0             | 1.182203223  |
| PVX_091560 | 0.000383392 | 0             | 3.564123029  |
| PVX_091565 | 0.016473156 | 0             | 1.501382715  |
| PVX_091570 | 1           | 0             | 0            |
| PVX_091575 | 1           | 0             | 0            |

| GeneID     | Pvalue      | BackGroundPre | BackGroundDx |
|------------|-------------|---------------|--------------|
| PVX_091580 | 1           | 0             | 0            |
| PVX_091585 | 0.007054102 | 0             | 2.117492695  |
| PVX_091590 | 0.007054102 | 0             | 2.146832084  |
| PVX_091595 | 0.078805602 | 0             | 1.153775526  |
| PVX_091600 | 0.001084333 | 0             | 3.225317617  |
| PVX_091605 | 3.76E-05    | 0             | 3.548968115  |
| PVX_091610 | 0.001084333 | 0             | 3.0854626    |
| PVX_091615 | 0.002855585 | 0             | 2.032441087  |
| PVX_091620 | 1           | 0             | 0            |
| PVX_091625 | 0.078805602 | 0             | 1.164326779  |
| PVX_091630 | 0.016473156 | 0             | 0.965966042  |
| PVX_091635 | 0.002855585 | 0             | 2.493500062  |
| PVX_091640 | 3.76E-05    | 0             | 6.486364862  |
| PVX_091645 | 1           | 0             | 0            |
| PVX_091650 | 0.166224591 | 0             | 0.718735505  |
| PVX_091652 | 0.007054102 | 0             | 2.314220778  |
| PVX_091655 | 3.76E-05    | 0             | 3.989718697  |
| PVX_091660 | 0.359317338 | 0             | 0.129460638  |
| PVX_091662 | 0.166224591 | 0             | 0.400746861  |
| PVX_091664 | 1           | 0             | 0            |
| PVX_091665 | 1           | 0             | 0            |
| PVX_091670 | 0.359317338 | 0             | 0.379318952  |
| PVX_091675 | 0.007054102 | 0             | 1.516850423  |
| PVX_091680 | 0.166224591 | 0             | 0.737222144  |
| PVX_091685 | 1           | 0             | 0            |
| PVX_091690 | 1           | 0             | 0            |
| PVX_091695 | 0.359317338 | 0             | 0.273348469  |
| PVX_091700 | 0.000125309 | 0             | 4.2057804    |
| PVX_091705 | 0.000125309 | 0             | 3.57157852   |
| PVX_091710 | 1           | 0             | 0            |
| PVX_091715 | 0.359317338 | 0             | 0.313707697  |
| PVX_091720 | 0.166224591 | 0             | 0.591788037  |
| PVX_091725 | 0.359317338 | 0             | 0.275984357  |
| PVX_091730 | 0.036687443 | 0             | 1.05856283   |
| PVX_091735 | 0.078805602 | 0             | 0.857332642  |
| PVX_091740 | 0.078805602 | 0             | 0.571156195  |
| PVX_091745 | 0.166224591 | 0             | 0.405084885  |
| PVX_091750 | 0.359317338 | 0             | 0.22149226   |
| PVX_091752 | 0.078805602 | 0             | 1.044572902  |
| PVX_091755 | 0.078805602 | 0             | 0.834394428  |
| PVX_091760 | 0.036687443 | 0             | 0.414740772  |

| GeneID     | Pvalue      | BackGroundPre | BackGroundDx |
|------------|-------------|---------------|--------------|
| PVX_091765 | 0.002855585 | 0             | 1.965273738  |
| PVX_091770 | 0.078805602 | 0             | 0.690438621  |
| PVX_091775 | 0.166224591 | 0             | 0.463577564  |
| PVX_091780 | 0.001084333 | 0             | 3.031501667  |
| PVX_091785 | 0.001084333 | 0             | 2.900541195  |
| PVX_091790 | 0.007054102 | 0             | 1.761460355  |
| PVX_091795 | 0.001084333 | 0             | 2.774542854  |
| PVX_091800 | 0.166224591 | 0             | 1.149472781  |
| PVX_091805 | 0.016473156 | 0             | 1.430238354  |
| PVX_091810 | 0.016473156 | 0             | 1.883912766  |
| PVX_091815 | 0.007054102 | 0             | 2.314860221  |
| PVX_091820 | 0.016473156 | 0             | 1.156475446  |
| PVX_091825 | 0.016473156 | 0             | 1.745067971  |
| PVX_091830 | 0.166224591 | 0             | 0.642105765  |
| PVX_091835 | 0.166224591 | 0             | 1.018856758  |
| PVX_091840 | 1           | 0             | 0            |
| PVX_091845 | 0.036687443 | 0             | 1.305954112  |
| PVX_091850 | 0.016473156 | 0             | 2.037068149  |
| PVX_091855 | 0.007054102 | 0             | 2.21139452   |
| PVX_091860 | 0.000125309 | 0             | 3.326866614  |
| PVX_091865 | 3.76E-05    | 0             | 5.857072982  |
| PVX_091870 | 0.359317338 | 0             | 0.329947519  |
| PVX_091875 | 0.007054102 | 0             | 2.154510742  |
| PVX_091880 | 0.078805602 | 0             | 1.175875744  |
| PVX_091885 | 0.000383392 | 0             | 2.666184471  |
| PVX_091890 | 0.016473156 | 0             | 1.722185144  |
| PVX_091895 | 0.078805602 | 0             | 1.088005837  |
| PVX_091900 | 0.359317338 | 0             | 0.520096704  |
| PVX_091905 | 0.078805602 | 0             | 0.834127418  |
| PVX_091910 | 0.359317338 | 0             | 0.213060922  |
| PVX_091915 | 0.016473156 | 0             | 2.178122531  |
| PVX_091920 | 3.76E-05    | 0             | 4.368574911  |
| PVX_091922 | 0.036687443 | 0             | 1.022439044  |
| PVX_091925 | 1.03E-05    | 0             | 6.988998108  |
| PVX_091930 | 0.166224591 | 0             | 0.634483674  |
| PVX_091935 | 0.007054102 | 0             | 2.349381642  |
| PVX_091940 | 0.001084333 | 0             | 2.496210009  |
| PVX_091945 | 1           | 0             | 0            |
| PVX_091950 | 0.166224591 | 0             | 0.460106832  |
| PVX_091955 | 0.166224591 | 0             | 0.526634918  |
| PVX_091960 | 0.166224591 | 0             | 1.133632822  |

| GeneID     | Pvalue      | BackGroundPre | BackGroundDx |
|------------|-------------|---------------|--------------|
| PVX_091965 | 0.007054102 | 0             | 2.637795606  |
| PVX_091970 | 0.000383392 | 0             | 3.743711315  |
| PVX_091975 | 0.078805602 | 0             | 1.317215685  |
| PVX_091980 | 0.036687443 | 0             | 1.304553894  |
| PVX_091985 | 0.078805602 | 0             | 0.889291943  |
| PVX_091990 | 0.016473156 | 0             | 1.708967925  |
| PVX_091992 | 0.036687443 | 0             | 1.655956682  |
| PVX_091995 | 1           | 0             | 0            |
| PVX_092000 | 0.007054102 | 0             | 1.692307313  |
| PVX_092005 | 0.359317338 | 0             | 0.290022276  |
| PVX_092010 | 0.001084333 | 0             | 2.066469204  |
| PVX_092015 | 1           | 0             | 0            |
| PVX_092025 | 0.002855585 | 0             | 3.025634469  |
| PVX_092030 | 0.036687443 | 0             | 2.138834677  |
| PVX_092035 | 0.078805602 | 0             | 0.496473183  |
| PVX_092040 | 0.001084333 | 0             | 3.187105176  |
| PVX_092045 | 0.002855585 | 0             | 2.119161595  |
| PVX_092050 | 0.166224591 | 0             | 0.525759436  |
| PVX_092055 | 0.359317338 | 0             | 0.27828215   |
| PVX_092060 | 1           | 0             | 0            |
| PVX_092065 | 0.000383392 | 0             | 4.085190244  |
| PVX_092070 | 1.03E-05    | 0             | 5.855544038  |
| PVX_092075 | 0.000383392 | 0             | 3.877584904  |
| PVX_092080 | 1           | 0             | 0            |
| PVX_092085 | 0.007054102 | 0             | 2.279602095  |
| PVX_092090 | 0.016473156 | 0             | 1.313777762  |
| PVX_092095 | 0.166224591 | 0             | 0.579222301  |
| PVX_092100 | 0.166224591 | 0             | 0.712409019  |
| PVX_092105 | 0.002855585 | 0             | 2.539198743  |
| PVX_092110 | 0.016473156 | 0             | 1.739965509  |
| PVX_092115 | 0.000383392 | 0             | 5.915222234  |
| PVX_092120 | 1.03E-05    | 0             | 6.406632037  |
| PVX_092125 | 0.002855585 | 0             | 2.962752872  |
| PVX_092130 | 0.078805602 | 0             | 0.758698354  |
| PVX_092135 | 0.078805602 | 0             | 0.95558997   |
| PVX_092140 | 0.002855585 | 0             | 1.732043898  |
| PVX_092145 | 1           | 0             | 0            |
| PVX_092150 | 0.036687443 | 0             | 0.86048253   |
| PVX_092155 | 0.078805602 | 0             | 1.195109795  |
| PVX_092160 | 0.359317338 | 0             | 0.221830365  |
| PVX_092165 | 0.166224591 | 0             | 0.719936844  |

| GeneID     | Pvalue      | BackGroundPre | BackGroundDx |
|------------|-------------|---------------|--------------|
| PVX_092170 | 0.166224591 | 0             | 0.534912085  |
| PVX_092175 | 0.016473156 | 0             | 1.146814027  |
| PVX_092180 | 1           | 0             | 0            |
| PVX_092185 | 0.166224591 | 0             | 0.380869885  |
| PVX_092190 | 1           | 0             | 0            |
| PVX_092195 | 0.016473156 | 0             | 1.490665332  |
| PVX_092200 | 0.078805602 | 0             | 1.068993794  |
| PVX_092205 | 0.002855585 | 0             | 2.068979868  |
| PVX_092210 | 1           | 0             | 0            |
| PVX_092215 | 3.76E-05    | 0             | 4.519659851  |
| PVX_092220 | 0.078805602 | 0             | 1.134665776  |
| PVX_092225 | 0.001084333 | 0             | 2.360244426  |
| PVX_092230 | 0.166224591 | 0             | 0.511972047  |
| PVX_092235 | 0.016473156 | 0             | 1.542095555  |
| PVX_092240 | 0.016473156 | 0             | 2.013020422  |
| PVX_092245 | 0.166224591 | 0             | 0.672882158  |
| PVX_092250 | 0.078805602 | 0             | 1.028419399  |
| PVX_092260 | 0.000383392 | 0             | 2.624108077  |
| PVX_092265 | 0.002855585 | 0             | 1.75729156   |
| PVX_092270 | 0.359317338 | 0             | 0.227194611  |
| PVX_092275 | 1           | 0             | 0            |
| PVX_092280 | 0.007054102 | 0             | 2.075899826  |
| PVX_092285 | 0.078805602 | 0             | 0.892298888  |
| PVX_092290 | 0.007054102 | 0             | 1.662583226  |
| PVX_092300 | 0.007054102 | 0             | 1.707692471  |
| PVX_092305 | 0.007054102 | 0             | 1.342131755  |
| PVX_092310 | 3.76E-05    | 0             | 4.24904162   |
| PVX_092315 | 0.001084333 | 0             | 3.033062485  |
| PVX_092320 | 0.001084333 | 0             | 2.063830433  |
| PVX_092325 | 0.078805602 | 0             | 0.4113988    |
| PVX_092330 | 0.359317338 | 0             | 0.336008949  |
| PVX_092335 | 0.036687443 | 0             | 0.866443682  |
| PVX_092340 | 1           | 0             | 0            |
| PVX_092345 | 0.016473156 | 0             | 1.41566809   |
| PVX_092350 | 0.001084333 | 0             | 2.950409264  |
| PVX_092355 | 1           | 0             | 0            |
| PVX_092360 | 1           | 0             | 0            |
| PVX_092365 | 0.001084333 | 0             | 3.207523639  |
| PVX_092370 | 0.359317338 | 0             | 0.16952906   |
| PVX_092375 | 0.007054102 | 0             | 2.06157574   |
| PVX_092380 | 1           | 0             | 0            |

| GeneID     | Pvalue      | BackGroundPre | BackGroundDx |
|------------|-------------|---------------|--------------|
| PVX_092385 | 0.000383392 | 0             | 3.920854471  |
| PVX_092390 | 0.002855585 | 0             | 2.657917628  |
| PVX_092395 | 0.002855585 | 0             | 1.801379489  |
| PVX_092400 | 0.166224591 | 0             | 1.23568903   |
| PVX_092405 | 0.359317338 | 0             | 0.405193407  |
| PVX_092410 | 0.001084333 | 0             | 3.15238878   |
| PVX_092415 | 0.166224591 | 0             | 0.216326984  |
| PVX_092420 | 0.166224591 | 0             | 0.539831889  |
| PVX_092425 | 1           | 0             | 0            |
| PVX_092430 | 0.002855585 | 0             | 2.252590777  |
| PVX_092435 | 3.76E-05    | 0             | 3.872793443  |
| PVX_092440 | 0.001084333 | 0             | 2.600646586  |
| PVX_092445 | 0.036687443 | 0             | 0.885943209  |
| PVX_092450 | 0.359317338 | 0             | 0.24201056   |
| PVX_092455 | 0.359317338 | 0             | 0.357487015  |
| PVX_092460 | 0.078805602 | 0             | 0.570014557  |
| PVX_092465 | 0.016473156 | 0             | 1.755568317  |
| PVX_092470 | 0.166224591 | 0             | 0.683827984  |
| PVX_092475 | 1           | 0             | 0            |
| PVX_092480 | 0.000125309 | 0             | 3.738804814  |
| PVX_092485 | 0.007054102 | 0             | 2.148949346  |
| PVX_092490 | 0.166224591 | 0             | 0.877826274  |
| PVX_092495 | 1           | 0             | 0            |
| PVX_092500 | 1           | 0             | 0            |
| PVX_092505 | 1           | 0             | 0            |
| PVX_092510 | 0.359317338 | 0             | 0.183901809  |
| PVX_092515 | 0.359317338 | 0             | 0.093124138  |
| PVX_092520 | 0.016473156 | 0             | 2.224494652  |
| PVX_092525 | 1           | 0             | 0            |
| PVX_092530 | 0.078805602 | 0             | 0.926612606  |
| PVX_092535 | 0.359317338 | 0             | 0.11625734   |
| PVX_092540 | 0.000125309 | 0             | 3.844884438  |
| PVX_092545 | 0.078805602 | 0             | 1.001497329  |
| PVX_092550 | 0.016473156 | 0             | 1.194194398  |
| PVX_092555 | 0.007054102 | 0             | 1.494298864  |
| PVX_092560 | 1           | 0             | 0            |
| PVX_092565 | 0.078805602 | 0             | 1.118400698  |
| PVX_092570 | 0.002855585 | 0             | 1.708579869  |
| PVX_092575 | 0.359317338 | 0             | 0.258329762  |
| PVX_092580 | 0.359317338 | 0             | 0.199130129  |
| PVX_092585 | 0.016473156 | 0             | 1.252153531  |

| GeneID     | Pvalue      | BackGroundPre | BackGroundDx |
|------------|-------------|---------------|--------------|
| PVX_092590 | 0.016473156 | 0             | 1.083429779  |
| PVX_092595 | 0.036687443 | 0             | 1.530334314  |
| PVX_092600 | 0.016473156 | 0             | 2.10211737   |
| PVX_092605 | 0.000383392 | 0             | 3.447250738  |
| PVX_092610 | 0.036687443 | 0             | 1.568300252  |
| PVX_092615 | 1           | 0             | 0            |
| PVX_092620 | 1           | 0             | 0            |
| PVX_092625 | 0.359317338 | 0             | 0.222102764  |
| PVX_092630 | 0.000125309 | 0             | 2.797412254  |
| PVX_092635 | 0.002855585 | 0             | 2.334095557  |
| PVX_092640 | 0.166224591 | 0             | 0.401701709  |
| PVX_092650 | 1           | 0             | 0            |
| PVX_092655 | 0.359317338 | 0             | 0.098410778  |
| PVX_092660 | 0.166224591 | 0             | 0.918140394  |
| PVX_092665 | 1           | 0             | 0            |
| PVX_092670 | 0.359317338 | 0             | 0.326544646  |
| PVX_092675 | 0.007054102 | 0             | 2.531825069  |
| PVX_092680 | 0.359317338 | 0             | 0.274005501  |
| PVX_092685 | 0.078805602 | 0             | 1.096746166  |
| PVX_092690 | 0.002855585 | 0             | 2.627831827  |
| PVX_092695 | 1           | 0             | 0            |
| PVX_092700 | 0.359317338 | 0             | 0.307678884  |
| PVX_092705 | 1           | 0             | 0            |
| PVX_092710 | 0.000125309 | 0             | 2.644995044  |
| PVX_092715 | 0.359317338 | 0             | 0.394823437  |
| PVX_092720 | 0.166224591 | 0             | 0.295683405  |
| PVX_092725 | 0.007054102 | 0             | 2.168415705  |
| PVX_092730 | 0.000125309 | 0             | 5.111240272  |
| PVX_092735 | 0.000125309 | 0             | 5.263875876  |
| PVX_092740 | 0.036687443 | 0             | 1.090202711  |
| PVX_092745 | 0.001084333 | 0             | 3.002210879  |
| PVX_092750 | 0.359317338 | 0             | 0.349148753  |
| PVX_092755 | 0.007054102 | 0             | 2.077223402  |
| PVX_092760 | 0.359317338 | 0             | 0.11980419   |
| PVX_092765 | 0.007054102 | 0             | 2.232276148  |
| PVX_092770 | 0.016473156 | 0             | 1.852727934  |
| PVX_092775 | 0.001084333 | 0             | 3.460577365  |
| PVX_092780 | 0.359317338 | 0             | 0.274235981  |
| PVX_092785 | 0.359317338 | 0             | 0.245684234  |
| PVX_092790 | 0.359317338 | 0             | 0.183800869  |
| PVX_092795 | 0.016473156 | 0             | 1.787809382  |

| GeneID     | Pvalue      | BackGroundPre | BackGroundDx |
|------------|-------------|---------------|--------------|
| PVX_092800 | 0.036687443 | 0             | 1.250052668  |
| PVX_092805 | 3.76E-05    | 0             | 5.95442617   |
| PVX_092810 | 0.078805602 | 0             | 1.242742473  |
| PVX_092815 | 1           | 0             | 0            |
| PVX_092820 | 1.03E-05    | 0             | 7.746088812  |
| PVX_092825 | 0.036687443 | 0             | 0.873190864  |
| PVX_092830 | 0.007054102 | 0             | 2.060287307  |
| PVX_092835 | 0.036687443 | 0             | 1.43683629   |
| PVX_092840 | 0.078805602 | 0             | 1.035840204  |
| PVX_092845 | 0.359317338 | 0             | 0.241288233  |
| PVX_092850 | 0.036687443 | 0             | 1.649073891  |
| PVX_092855 | 1           | 0             | 0            |
| PVX_092860 | 0.000383392 | 0             | 3.245117116  |
| PVX_092865 | 1           | 0             | 0            |
| PVX_092870 | 0.078805602 | 0             | 1.298562796  |
| PVX_092875 | 0.002855585 | 0             | 2.463600145  |
| PVX_092880 | 0.007054102 | 0             | 1.908397453  |
| PVX_092885 | 0.078805602 | 0             | 0.776116829  |
| PVX_092890 | 0.166224591 | 0             | 0.697749165  |
| PVX_092895 | 0.016473156 | 0             | 1.521210642  |
| PVX_092897 | 1           | 0             | 0            |
| PVX_092900 | 0.016473156 | 0             | 1.735551516  |
| PVX_092905 | 1           | 0             | 0            |
| PVX_092910 | 0.036687443 | 0             | 1.737854777  |
| PVX_092915 | 1           | 0             | 0            |
| PVX_092920 | 1           | 0             | 0            |
| PVX_092925 | 0.078805602 | 0             | 0.785510139  |
| PVX_092930 | 1           | 0             | 0            |
| PVX_092935 | 0.359317338 | 0             | 0.094626887  |
| PVX_092940 | 0.016473156 | 0             | 1.765566869  |
| PVX_092945 | 0.359317338 | 0             | 0.086794195  |
| PVX_092947 | 1           | 0             | 0            |
| PVX_092950 | 0.359317338 | 0             | 0.240195432  |
| PVX_092955 | 0.359317338 | 0             | 0.137457741  |
| PVX_092958 | 0.078805602 | 0             | 1.961325546  |
| PVX_092962 | 0.016473156 | 0             | 1.375315117  |
| PVX_092965 | 0.016473156 | 0             | 1.607898718  |
| PVX_092970 | 0.036687443 | 0             | 1.36232234   |
| PVX_092975 | 0.359317338 | 0             | 0.119746976  |
| PVX_092980 | 0.166224591 | 0             | 0.719134284  |
| PVX_092985 | 0.016473156 | 0             | 1.320281341  |



| GeneID     | Pvalue      | BackGroundPre | BackGroundDx |
|------------|-------------|---------------|--------------|
| PVX_092990 | 0.000125309 | 0             | 3.546262994  |
| PVX_092995 | 0.002855585 | 0             | 3.028428781  |
| PVX_093495 | 1           | 0             | 0            |
| PVX_093500 | 1           | 0             | 0            |
| PVX_093505 | 1           | 0             | 0            |
| PVX_093510 | 0.000125309 | 0             | 3.63696869   |
| PVX_093515 | 0.007054102 | 0             | 2.208133517  |
| PVX_093520 | 0.007054102 | 0             | 2.675175228  |
| PVX_093525 | 0.166224591 | 0             | 0.267940365  |
| PVX_093530 | 0.007054102 | 0             | 1.913269021  |
| PVX_093535 | 0.016473156 | 0             | 1.011731133  |
| PVX_093540 | 0.007054102 | 0             | 1.853171226  |
| PVX_093545 | 0.007054102 | 0             | 2.030242222  |
| PVX_093550 | 0.016473156 | 0             | 1.619267103  |
| PVX_093555 | 3.76E-05    | 0             | 5.188985455  |
| PVX_093560 | 0.007054102 | 0             | 2.2074767    |
| PVX_093565 | 0.016473156 | 0             | 1.212085152  |
| PVX_093570 | 1           | 0             | 0            |
| PVX_093575 | 0.036687443 | 0             | 1.010099453  |
| PVX_093580 | 0.007054102 | 0             | 2.068542501  |
| PVX_093585 | 0.166224591 | 0             | 0.568541773  |
| PVX_093590 | 0.000383392 | 0             | 3.076652566  |
| PVX_093595 | 0.007054102 | 0             | 2.202532586  |
| PVX_093600 | 0.359317338 | 0             | 0.288523851  |
| PVX_093605 | 0.016473156 | 0             | 1.697348839  |
| PVX_093607 | 0.166224591 | 0             | 0.694313767  |
| PVX_093610 | 0.359317338 | 0             | 0.237596439  |
| PVX_093615 | 0.036687443 | 0             | 1.058381133  |
| PVX_093620 | 0.036687443 | 0             | 1.411293952  |
| PVX_093625 | 0.001084333 | 0             | 2.523722557  |
| PVX_093630 | 0.001084333 | 0             | 3.821223316  |
| PVX_093635 | 0.007054102 | 0             | 1.198124236  |
| PVX_093640 | 0.007054102 | 0             | 1.745511269  |
| PVX_093645 | 0.002855585 | 0             | 1.481678397  |
| PVX_093650 | 0.036687443 | 0             | 1.151336516  |
| PVX_093655 | 0.078805602 | 0             | 0.605047097  |
| PVX_093660 | 0.007054102 | 0             | 2.262625081  |
| PVX_093665 | 0.002855585 | 0             | 2.449620494  |
| PVX_093670 | 1           | 0             | 0            |
| PVX_093675 | 1           | 0             | 0            |
| PVX_093680 | 1.42E-05    | 0.300125289   | 6.794770629  |

| GeneID     | Pvalue      | BackGroundPre | BackGroundDx |
|------------|-------------|---------------|--------------|
| PVX_093682 | 1           | 0             | 0            |
| PVX_093685 | 1.03E-05    | 0             | 5.710927703  |
| PVX_093695 | 0.078805602 | 0             | 1.214206163  |
| PVX_093700 | 0.078805602 | 0             | 1.099057258  |
| PVX_093705 | 0.036687443 | 0             | 1.365826711  |
| PVX_093710 | 0.359317338 | 0             | 0.384417944  |
| PVX_093715 | 0.359317338 | 0             | 0.313604098  |
| PVX_093720 | 1           | 0             | 0            |
| PVX_093725 | 1           | 0             | 0            |
| PVX_093730 | 0.359317338 | 0             | 0.315373186  |
| PVX_093735 | 1           | 0             | 0            |
| PVX_094230 | 0.078805602 | 0             | 0.407094425  |
| PVX_094235 | 1           | 0             | 0            |
| PVX_094240 | 1           | 0             | 0            |
| PVX_094243 | 1           | 0             | 0            |
| PVX_094245 | 0.359317338 | 0             | 0.241889463  |
| PVX_094247 | 1           | 0             | 0            |
| PVX_094250 | 1           | 0             | 0            |
| PVX_094255 | 0.359317338 | 0             | 0.136178194  |
| PVX_094260 | 0.359317338 | 0             | 0.351828337  |
| PVX_094265 | 0.078805602 | 0             | 0.516220549  |
| PVX_094270 | 0.359317338 | 0             | 0.367246723  |
| PVX_094275 | 0.000125309 | 0             | 4.309018959  |
| PVX_094277 | 0.002855585 | 0             | 2.514301586  |
| PVX_094280 | 0.007054102 | 0             | 2.219668911  |
| PVX_094285 | 0.007054102 | 0             | 2.345579629  |
| PVX_094290 | 0.016473156 | 0             | 1.895967785  |
| PVX_094295 | 0.078805602 | 0             | 1.166714401  |
| PVX_094300 | 3.76E-05    | 0             | 3.860194854  |
| PVX_094303 | 3.76E-05    | 0             | 5.011809792  |
| PVX_094305 | 0.359317338 | 0             | 0.281108206  |
| PVX_094310 | 1           | 0             | 0            |
| PVX_094315 | 0.001084333 | 0             | 3.563958997  |
| PVX_094325 | 0.166224591 | 0             | 0.774418315  |
| PVX_094330 | 0.016473156 | 0             | 1.616978778  |
| PVX_094335 | 0.016473156 | 0             | 1.519886951  |
| PVX_094340 | 0.007054102 | 0             | 1.5435507    |
| PVX_094345 | 0.036687443 | 0             | 1.691122503  |
| PVX_094350 | 0.036687443 | 0             | 0.838561738  |
| PVX_094355 | 1           | 0             | 0            |
| PVX_094360 | 0.078805602 | 0             | 1.268275916  |

| GeneID     | Pvalue      | BackGroundPre | BackGroundDx |
|------------|-------------|---------------|--------------|
| PVX_094365 | 0.359317338 | 0             | 0.33707562   |
| PVX_094370 | 0.359317338 | 0             | 0.218017721  |
| PVX_094375 | 0.001084333 | 0             | 3.946822144  |
| PVX_094380 | 0.359317338 | 0             | 0.290607199  |
| PVX_094385 | 0.002855585 | 0             | 1.9847855    |
| PVX_094390 | 0.001084333 | 0             | 2.31727607   |
| PVX_094395 | 0.359317338 | 0             | 0.290221974  |
| PVX_094400 | 0.000383392 | 0             | 4.601195065  |
| PVX_094405 | 0.002855585 | 0             | 1.504005352  |
| PVX_094410 | 0.359317338 | 0             | 0.155160878  |
| PVX_094415 | 0.000125309 | 0             | 4.049251814  |
| PVX_094420 | 0.166224591 | 0             | 0.626171121  |
| PVX_094425 | 0.359317338 | 0             | 0.286500411  |
| PVX_094430 | 0.359317338 | 0             | 0.284832958  |
| PVX_094435 | 0.078805602 | 0             | 0.934379266  |
| PVX_094440 | 0.078805602 | 0             | 1.005975331  |
| PVX_094445 | 0.002855585 | 0             | 2.256577415  |
| PVX_094450 | 0.016473156 | 0             | 1.452831829  |
| PVX_094455 | 0.359317338 | 0             | 0.345162889  |
| PVX_094460 | 1           | 0             | 0            |
| PVX_094462 | 1           | 0             | 0            |
| PVX_094465 | 0.016473156 | 0             | 1.315019393  |
| PVX_094470 | 0.078805602 | 0             | 0.982451002  |
| PVX_094480 | 0.166224591 | 0             | 0.528099122  |
| PVX_094485 | 1           | 0             | 0            |
| PVX_094490 | 0.078805602 | 0             | 1.066950526  |
| PVX_094495 | 1           | 0             | 0            |
| PVX_094500 | 1           | 0             | 0            |
| PVX_094505 | 0.007054102 | 0             | 2.48365692   |
| PVX_094510 | 1           | 0             | 0            |
| PVX_094515 | 0.166224591 | 0             | 0.517649329  |
| PVX_094520 | 0.359317338 | 0             | 0.48540113   |
| PVX_094525 | 0.016473156 | 0             | 2.174543065  |
| PVX_094530 | 0.000383392 | 0             | 2.610349997  |
| PVX_094535 | 1.03E-05    | 0             | 6.043139051  |
| PVX_094540 | 0.359317338 | 0             | 0.310691038  |
| PVX_094545 | 0.078805602 | 0             | 0.951793449  |
| PVX_094550 | 0.359317338 | 0             | 0.352546152  |
| PVX_094555 | 1           | 0             | 0            |
| PVX_094560 | 1           | 0             | 0            |
| PVX_094565 | 0.007054102 | 0             | 2.295133448  |

| GeneID     | Pvalue      | BackGroundPre | BackGroundDx |
|------------|-------------|---------------|--------------|
| PVX_094570 | 0.078805602 | 0             | 1.332568011  |
| PVX_094575 | 0.016473156 | 0             | 2.489120829  |
| PVX_094580 | 0.007054102 | 0             | 1.513722431  |
| PVX_094585 | 0.166224591 | 0             | 0.552903699  |
| PVX_094590 | 0.002855585 | 0             | 2.820703012  |
| PVX_094595 | 0.007054102 | 0             | 1.417845776  |
| PVX_094600 | 0.000383392 | 0             | 2.326802184  |
| PVX_094605 | 0.036687443 | 0             | 1.630439689  |
| PVX_094610 | 0.359317338 | 0             | 0.357474564  |
| PVX_094615 | 0.000125309 | 0             | 4.229578195  |
| PVX_094620 | 0.078805602 | 0             | 0.751738135  |
| PVX_094625 | 1           | 0             | 0            |
| PVX_094635 | 0.000125309 | 0             | 4.236891681  |
| PVX_094640 | 0.007054102 | 0             | 2.212443495  |
| PVX_094645 | 0.000125309 | 0             | 4.596915738  |
| PVX_094650 | 1           | 0             | 0            |
| PVX_094655 | 0.078805602 | 0             | 1.027263768  |
| PVX_094660 | 0.002855585 | 0             | 2.850374138  |
| PVX_094665 | 0.016473156 | 0             | 1.601679762  |
| PVX_094670 | 1           | 0             | 0            |
| PVX_094675 | 0.001084333 | 0             | 2.565019708  |
| PVX_094680 | 0.016473156 | 0             | 1.780042657  |
| PVX_094685 | 0.007054102 | 0             | 2.227374662  |
| PVX_094690 | 0.016473156 | 0             | 1.835131343  |
| PVX_094695 | 0.166224591 | 0             | 0.594394053  |
| PVX_094700 | 1           | 0             | 0            |
| PVX_094705 | 0.078805602 | 0             | 0.735009603  |
| PVX_094710 | 0.166224591 | 0             | 0.345609788  |
| PVX_094715 | 0.002855585 | 0             | 2.377403902  |
| PVX_094720 | 0.036687443 | 0             | 1.449931066  |
| PVX_094725 | 0.166224591 | 0             | 0.60161119   |
| PVX_094730 | 0.002855585 | 0             | 1.874581611  |
| PVX_094735 | 0.016473156 | 0             | 2.245396568  |
| PVX_094740 | 1           | 0             | 0            |
| PVX_094745 | 1           | 0             | 0            |
| PVX_094750 | 0.000125309 | 0             | 3.965566489  |
| PVX_094755 | 0.007054102 | 0             | 2.050788036  |
| PVX_094760 | 0.002855585 | 0             | 2.81007929   |
| PVX_094765 | 0.036687443 | 0             | 1.500139882  |
| PVX_094770 | 1           | 0             | 0            |
| PVX_094775 | 0.166224591 | 0             | 0.593593777  |

| GeneID     | Pvalue      | BackGroundPre | BackGroundDx |
|------------|-------------|---------------|--------------|
| PVX_094780 | 0.078805602 | 0             | 1.012063657  |
| PVX_094785 | 0.078805602 | 0             | 1.038546796  |
| PVX_094790 | 0.000383392 | 0             | 4.433848193  |
| PVX_094795 | 0.166224591 | 0             | 0.807638043  |
| PVX_094800 | 0.078805602 | 0             | 0.801418903  |
| PVX_094805 | 0.002855585 | 0             | 2.515484156  |
| PVX_094810 | 0.000125309 | 0             | 3.518771143  |
| PVX_094815 | 0.078805602 | 0             | 1.061655671  |
| PVX_094820 | 0.078805602 | 0             | 0.772726182  |
| PVX_094825 | 0.078805602 | 0             | 1.027388658  |
| PVX_094830 | 1           | 0             | 0            |
| PVX_094835 | 3.76E-05    | 0             | 4.210853962  |
| PVX_094840 | 3.76E-05    | 0             | 5.895607161  |
| PVX_094845 | 0.016473156 | 0             | 1.471077862  |
| PVX_094850 | 0.001084333 | 0             | 2.943626387  |
| PVX_094855 | 0.002855585 | 0             | 1.807890467  |
| PVX_094860 | 0.007054102 | 0             | 1.994169929  |
| PVX_094865 | 3.76E-05    | 0             | 4.062733236  |
| PVX_094870 | 0.166224591 | 0             | 0.544844499  |
| PVX_094875 | 0.002855585 | 0             | 1.940043402  |
| PVX_094880 | 0.036687443 | 0             | 0.949110061  |
| PVX_094885 | 0.000125309 | 0             | 3.622389217  |
| PVX_094890 | 1           | 0             | 0            |
| PVX_094895 | 0.007054102 | 0             | 1.514945076  |
| PVX_094900 | 0.166224591 | 0             | 0.404521041  |
| PVX_094902 | 0.359317338 | 0             | 0.371485607  |
| PVX_094905 | 1           | 0             | 0            |
| PVX_094910 | 0.016473156 | 0             | 1.310562323  |
| PVX_094915 | 1           | 0             | 0            |
| PVX_094920 | 0.166224591 | 0             | 0.630033816  |
| PVX_094925 | 0.166224591 | 0             | 0.44782788   |
| PVX_094930 | 0.002855585 | 0             | 1.919687935  |
| PVX_094935 | 0.078805602 | 0             | 1.050183751  |
| PVX_094940 | 0.078805602 | 0             | 0.580035432  |
| PVX_094945 | 0.000125309 | 0             | 2.895488927  |
| PVX_094950 | 0.001084333 | 0             | 3.25936136   |
| PVX_094955 | 1           | 0             | 0            |
| PVX_094965 | 1           | 0             | 0            |
| PVX_094970 | 0.078805602 | 0             | 1.145388207  |
| PVX_094975 | 0.166224591 | 0             | 0.657834821  |
| PVX_094980 | 0.001084333 | 0             | 3.047089466  |

| GeneID     | Pvalue      | BackGroundPre | BackGroundDx |
|------------|-------------|---------------|--------------|
| PVX_094985 | 0.002855585 | 0             | 2.783016677  |
| PVX_094990 | 0.002855585 | 0             | 2.181110558  |
| PVX_094995 | 0.166224591 | 0             | 0.681746083  |
| PVX_095000 | 0.007054102 | 0             | 2.332082318  |
| PVX_095005 | 0.078805602 | 0             | 0.938988793  |
| PVX_095010 | 0.016473156 | 0             | 1.840971178  |
| PVX_095015 | 1.03E-05    | 0             | 8.062592305  |
| PVX_095020 | 1           | 0             | 0            |
| PVX_095025 | 0.078805602 | 0             | 1.008511356  |
| PVX_095030 | 0.000383392 | 0             | 3.571356864  |
| PVX_095035 | 0.166224591 | 0             | 0.429281342  |
| PVX_095040 | 0.002855585 | 0             | 1.980705225  |
| PVX_095045 | 0.000125309 | 0             | 3.536741435  |
| PVX_095050 | 0.000383392 | 0             | 3.440258561  |
| PVX_095055 | 0.166224591 | 0             | 0.355818522  |
| PVX_095060 | 0.036687443 | 0             | 1.192481235  |
| PVX_095065 | 0.166224591 | 0             | 0.512022294  |
| PVX_095070 | 0.036687443 | 0             | 1.23710345   |
| PVX_095075 | 0.016473156 | 0             | 2.34904773   |
| PVX_095080 | 1.03E-05    | 0             | 7.056169106  |
| PVX_095085 | 1           | 0             | 0            |
| PVX_095095 | 0.036687443 | 0             | 0.662004558  |
| PVX_095100 | 0.359317338 | 0             | 0.183392652  |
| PVX_095105 | 0.016473156 | 0             | 1.891684062  |
| PVX_095115 | 0.016473156 | 0             | 1.3890464    |
| PVX_095120 | 0.016473156 | 0             | 1.675173555  |
| PVX_095125 | 1           | 0             | 0            |
| PVX_095130 | 0.036687443 | 0             | 1.348803282  |
| PVX_095135 | 3.76E-05    | 0             | 5.764390871  |
| PVX_095140 | 0.007054102 | 0             | 1.540073927  |
| PVX_095145 | 0.007054102 | 0             | 1.310820091  |
| PVX_095150 | 0.002855585 | 0             | 1.847174016  |
| PVX_095155 | 0.016473156 | 0             | 1.195949376  |
| PVX_095160 | 0.000383392 | 0             | 3.287167226  |
| PVX_095165 | 0.359317338 | 0             | 0.320196123  |
| PVX_095170 | 0.007054102 | 0             | 1.854203258  |
| PVX_095175 | 0.036687443 | 0             | 1.320728569  |
| PVX_095180 | 0.016473156 | 0             | 1.35110392   |
| PVX_095185 | 0.078805602 | 0             | 0.895080231  |
| PVX_095190 | 0.000125309 | 0             | 5.14460088   |
| PVX_095195 | 0.036687443 | 0             | 1.276504959  |

| GeneID     | Pvalue      | BackGroundPre | BackGroundDx |
|------------|-------------|---------------|--------------|
| PVX_095200 | 0.016473156 | 0             | 1.71258868   |
| PVX_095205 | 0.000125309 | 0             | 4.10878804   |
| PVX_095210 | 0.002855585 | 0             | 2.876664665  |
| PVX_095215 | 0.166224591 | 0             | 0.336002124  |
| PVX_095220 | 3.76E-05    | 0             | 4.512898951  |
| PVX_095225 | 1           | 0             | 0            |
| PVX_095230 | 0.007054102 | 0             | 2.182281767  |
| PVX_095235 | 0.000383392 | 0             | 3.968600607  |
| PVX_095240 | 0.036687443 | 0             | 1.454634475  |
| PVX_095245 | 0.078805602 | 0             | 0.894070929  |
| PVX_095250 | 0.002855585 | 0             | 1.706657951  |
| PVX_095255 | 0.016473156 | 0             | 2.735298065  |
| PVX_095260 | 0.007054102 | 0             | 2.036499257  |
| PVX_095265 | 0.001084333 | 0             | 2.111441555  |
| PVX_095270 | 0.078805602 | 0             | 0.909813928  |
| PVX_095275 | 0.002855585 | 0             | 2.441475159  |
| PVX_095280 | 0.036687443 | 0             | 1.599115982  |
| PVX_095285 | 0.359317338 | 0             | 0.206095508  |
| PVX_095290 | 0.002855585 | 0             | 2.719017437  |
| PVX_095295 | 0.036687443 | 0             | 1.489945285  |
| PVX_095300 | 0.036687443 | 0             | 1.126237735  |
| PVX_095305 | 0.166224591 | 0             | 0.195378852  |
| PVX_095310 | 1           | 0             | 0            |
| PVX_095315 | 0.002855585 | 0             | 2.113425886  |
| PVX_095320 | 3.76E-05    | 0             | 3.161078624  |
| PVX_095325 | 0.007054102 | 0             | 2.354911455  |
| PVX_095330 | 0.166224591 | 0             | 0.595988007  |
| PVX_095335 | 0.166224591 | 0             | 0.505799136  |
| PVX_095340 | 0.016473156 | 0             | 1.967161707  |
| PVX_095345 | 0.002855585 | 0             | 1.753315668  |
| PVX_095350 | 3.76E-05    | 0             | 5.902491709  |
| PVX_095355 | 0.166224591 | 0             | 0.550755711  |
| PVX_095360 | 0.166224591 | 0             | 0.669820151  |
| PVX_095365 | 0.000383392 | 0             | 2.148489708  |
| PVX_095370 | 0.016473156 | 0             | 1.380507623  |
| PVX_095375 | 0.078805602 | 0             | 0.872414776  |
| PVX_095380 | 0.000125309 | 0             | 4.588570419  |
| PVX_095385 | 0.016473156 | 0             | 1.710697082  |
| PVX_095390 | 0.000125309 | 0             | 5.84289657   |
| PVX_095395 | 1           | 0             | 0            |
| PVX_095400 | 0.016473156 | 0             | 2.030704749  |

| GeneID      | Pvalue      | BackGroundPre | BackGroundDx |
|-------------|-------------|---------------|--------------|
| PVX_095405  | 0.002855585 | 0             | 2.784228209  |
| PVX_095410  | 0.001084333 | 0             | 3.129905123  |
| PVX_095415  | 0.016473156 | 0             | 1.687908352  |
| PVX_095420  | 3.76E-05    | 0             | 4.462576811  |
| PVX_095425  | 0.036687443 | 0             | 1.191951454  |
| PVX_095430  | 0.007054102 | 0             | 2.509965831  |
| PVX_095435  | 1           | 0             | 0            |
| PVX_095440  | 0.166224591 | 0             | 0.699943864  |
| PVX_095445  | 0.016473156 | 0             | 1.682739838  |
| PVX_095450  | 0.359317338 | 0             | 0.205756842  |
| PVX_095452  | 0.007054102 | 0             | 1.547596793  |
| PVX_095455  | 0.036687443 | 0             | 1.559788244  |
| PVX_095460  | 0.016473156 | 0             | 2.09510432   |
| PVX_095470  | 0.007054102 | 0             | 1.616901865  |
| PVX_095475  | 1           | 0             | 0            |
| PVX_095480  | 0.001084333 | 0             | 3.784250345  |
| PVX_095485  | 0.001084333 | 0             | 4.158281692  |
| PVX_095490  | 0.166224591 | 0             | 0.458639451  |
| PVX_095495  | 1           | 0             | 0            |
| PVX_095990  | 0.359317338 | 0             | 0.320196123  |
| PVX_095995  | 1           | 0             | 0            |
| PVX_095997  | 0.036687443 | 0             | 1.133882908  |
| PVX_096000  | 1           | 0             | 0            |
| PVX_096001  | 1           | 0             | 0            |
| PVX_096001a | 0.166224591 | 0             | 0.543594588  |
| PVX_096003  | 1           | 0             | 0            |
| PVX_096004  | 1           | 0             | 0            |
| PVX_096005  | 0.166224591 | 0             | 0.607344652  |
| PVX_096007  | 1           | 0             | 0            |
| PVX_096010  | 0.016473156 | 0             | 1.831949645  |
| PVX_096015  | 0.036687443 | 0             | 1.730069437  |
| PVX_096020  | 0.016473156 | 0             | 2.000293189  |
| PVX_096030  | 0.007054102 | 0             | 2.695435077  |
| PVX_096035  | 0.166224591 | 0             | 0.589954628  |
| PVX_096040  | 1           | 0             | 0            |
| PVX_096045  | 0.001084333 | 0             | 4.17068054   |
| PVX_096050  | 0.007054102 | 0             | 2.280589801  |
| PVX_096055  | 0.078805602 | 0             | 1.030069073  |
| PVX_096060  | 0.078805602 | 0             | 1.220051484  |
| PVX_096065  | 0.016473156 | 0             | 1.976065525  |
| PVX_096070  | 0.000383392 | 0             | 4.102871594  |



| GeneID     | Pvalue      | BackGroundPre | BackGroundDx |
|------------|-------------|---------------|--------------|
| PVX_096071 | 1           | 0             | 0            |
| PVX_096075 | 0.036687443 | 0             | 1.198701946  |
| PVX_096080 | 0.007054102 | 0             | 2.558572516  |
| PVX_096085 | 0.166224591 | 0             | 0.458423671  |
| PVX_096090 | 0.166224591 | 0             | 0.459595295  |
| PVX_096095 | 1           | 0             | 0            |
| PVX_096105 | 1           | 0             | 0            |
| PVX_096110 | 0.016473156 | 0             | 0.883610385  |
| PVX_096115 | 0.078805602 | 0             | 0.612982859  |
| PVX_096120 | 1           | 0             | 0            |
| PVX_096125 | 0.078805602 | 0             | 1.304273007  |
| PVX_096130 | 0.016473156 | 0             | 1.600575364  |
| PVX_096135 | 0.036687443 | 0             | 1.366615505  |
| PVX_096140 | 0.016473156 | 0             | 1.39097794   |
| PVX_096145 | 0.036687443 | 0             | 0.914859314  |
| PVX_096150 | 0.001084333 | 0             | 2.232769464  |
| PVX_096155 | 0.007054102 | 0             | 1.487439     |
| PVX_096165 | 0.007054102 | 0             | 1.921195587  |
| PVX_096170 | 0.016473156 | 0             | 2.498870224  |
| PVX_096175 | 0.359317338 | 0             | 0.352101243  |
| PVX_096180 | 0.002855585 | 0             | 2.006842786  |
| PVX_096185 | 1           | 0             | 0            |
| PVX_096195 | 1           | 0             | 0            |
| PVX_096200 | 0.359317338 | 0             | 0.243396289  |
| PVX_096205 | 0.166224591 | 0             | 0.558993642  |
| PVX_096210 | 0.166224591 | 0             | 0.752960806  |
| PVX_096215 | 0.359317338 | 0             | 0.265852108  |
| PVX_096220 | 0.016473156 | 0             | 2.366754161  |
| PVX_096225 | 0.002855585 | 0             | 2.686973486  |
| PVX_096230 | 0.036687443 | 0             | 1.550688684  |
| PVX_096235 | 0.000383392 | 0             | 3.488595612  |
| PVX_096240 | 0.000383392 | 0             | 2.862484156  |
| PVX_096245 | 0.166224591 | 0             | 0.612687159  |
| PVX_096250 | 0.001084333 | 0             | 3.014939986  |
| PVX_096252 | 0.001084333 | 0             | 3.448687926  |
| PVX_096253 | 0.359317338 | 0             | 0.543751494  |
| PVX_096255 | 0.000383392 | 0             | 4.106291222  |
| PVX_096260 | 1           | 0             | 0            |
| PVX_096265 | 0.000125309 | 0             | 5.651958782  |
| PVX_096268 | 0.036687443 | 0             | 1.301848754  |
| PVX_096271 | 0.007054102 | 0             | 2.541734522  |

| GeneID     | Pvalue      | BackGroundPre | BackGroundDx |
|------------|-------------|---------------|--------------|
| PVX_096273 | 0.002855585 | 0             | 2.161225631  |
| PVX_096275 | 0.016473156 | 0             | 1.439304362  |
| PVX_096280 | 0.000125309 | 0             | 4.813003299  |
| PVX_096285 | 0.001084333 | 0             | 2.033847002  |
| PVX_096289 | 0.078805602 | 0             | 1.290852293  |
| PVX_096292 | 0.007054102 | 0             | 2.510995948  |
| PVX_096295 | 0.016473156 | 0             | 1.314863861  |
| PVX_096300 | 0.002855585 | 0             | 3.233833791  |
| PVX_096302 | 0.016473156 | 0             | 2.397511277  |
| PVX_096305 | 0.001084333 | 0             | 2.923373313  |
| PVX_096307 | 1           | 0             | 0            |
| PVX_096310 | 0.359317338 | 0             | 0.345735142  |
| PVX_096315 | 0.036687443 | 0             | 1.580088039  |
| PVX_096320 | 0.002855585 | 0             | 2.957669832  |
| PVX_096325 | 0.002855585 | 0             | 1.524533861  |
| PVX_096330 | 0.007054102 | 0             | 2.049260864  |
| PVX_096335 | 0.000125309 | 0             | 5.257979575  |
| PVX_096340 | 1.03E-05    | 0             | 6.93670559   |
| PVX_096345 | 0.002855585 | 0             | 2.360442652  |
| PVX_096350 | 0.002855585 | 0             | 2.172315178  |
| PVX_096355 | 0.016473156 | 0             | 1.664101264  |
| PVX_096360 | 0.359317338 | 0             | 0.325709572  |
| PVX_096365 | 0.078805602 | 0             | 1.348851033  |
| PVX_096370 | 0.001084333 | 0             | 3.655051889  |
| PVX_096380 | 0.016473156 | 0             | 2.252090721  |
| PVX_096385 | 0.359317338 | 0             | 0.282855283  |
| PVX_096390 | 1           | 0             | 0            |
| PVX_096395 | 0.359317338 | 0             | 0.2213104    |
| PVX_096400 | 0.078805602 | 0             | 1.097797271  |
| PVX_096405 | 0.078805602 | 0             | 1.169750737  |
| PVX_096410 | 1           | 0             | 0            |
| PVX_096910 | 1           | 0             | 0            |
| PVX_096920 | 0.359317338 | 0             | 0.268705017  |
| PVX_096925 | 1           | 0             | 0            |
| PVX_096930 | 0.359317338 | 0             | 0.381198591  |
| PVX_096935 | 1           | 0             | 0            |
| PVX_096937 | 0.359317338 | 0             | 0.282336205  |
| PVX_096938 | 1           | 0             | 0            |
| PVX_096940 | 1           | 0             | 0            |
| PVX_096945 | 0.359317338 | 0             | 0.506951212  |
| PVX_096950 | 0.000383392 | 0             | 3.717213786  |

| GeneID     | Pvalue      | BackGroundPre | BackGroundDx |
|------------|-------------|---------------|--------------|
| PVX_096955 | 0.000125309 | 0             | 4.505976065  |
| PVX_096960 | 1           | 0             | 0            |
| PVX_096965 | 1           | 0             | 0            |
| PVX_096970 | 0.036687443 | 0             | 1.441912517  |
| PVX_096975 | 3.76E-05    | 0             | 4.811133136  |
| PVX_096980 | 0.002855585 | 0             | 2.93702268   |
| PVX_096985 | 0.078805602 | 0             | 1.0220985    |
| PVX_096987 | 0.001084333 | 0             | 3.548135498  |
| PVX_096990 | 0.166224591 | 0             | 0.501958672  |
| PVX_096992 | 0.016473156 | 0             | 2.076381343  |
| PVX_096995 | 0.000125309 | 0             | 4.258976099  |
| PVX_097000 | 0.036687443 | 0             | 1.072247877  |
| PVX_097002 | 1           | 0             | 0            |
| PVX_097005 | 0.166224591 | 0             | 0.740121521  |
| PVX_097010 | 0.078805602 | 0             | 1.092774093  |
| PVX_097015 | 0.016473156 | 0             | 1.406031309  |
| PVX_097025 | 0.007054102 | 0             | 1.376654009  |
| PVX_097525 | 1           | 0             | 0            |
| PVX_097530 | 1           | 0             | 0            |
| PVX_097540 | 0.036687443 | 0             | 1.105436216  |
| PVX_097542 | 1           | 0             | 0            |
| PVX_097545 | 0.166224591 | 0             | 0.594601202  |
| PVX_097550 | 0.078805602 | 0             | 0.775570904  |
| PVX_097555 | 1           | 0             | 0            |
| PVX_097557 | 0.000125309 | 0             | 3.771351495  |
| PVX_097560 | 0.036687443 | 0             | 1.296023472  |
| PVX_097565 | 0.002855585 | 0             | 2.760712269  |
| PVX_097567 | 0.016473156 | 0             | 1.97873593   |
| PVX_097570 | 0.166224591 | 0             | 0.525056922  |
| PVX_097575 | 0.003138348 | 0.205539965   | 2.279009527  |
| PVX_097577 | 0.078805602 | 0             | 1.000467515  |
| PVX_097580 | 0.166224591 | 0             | 0.743596083  |
| PVX_097583 | 0.000125309 | 0             | 6.107103813  |
| PVX_097585 | 0.166224591 | 0             | 0.771316254  |
| PVX_097590 | 1           | 0             | 0            |
| PVX_097592 | 1           | 0             | 0            |
| PVX_097595 | 0.359317338 | 0             | 0.322976835  |
| PVX_097600 | 0.007054102 | 0             | 2.46288982   |
| PVX_097605 | 0.016473156 | 0             | 1.4433963    |
| PVX_097610 | 0.007054102 | 0             | 2.238084281  |
| PVX_097615 | 0.078805602 | 0             | 0.854431147  |

| GeneID     | Pvalue      | BackGroundPre | BackGroundDx |
|------------|-------------|---------------|--------------|
| PVX_097620 | 1           | 0             | 0            |
| PVX_097625 | 1.03E-05    | 0             | 5.351226511  |
| PVX_097630 | 1           | 0             | 0            |
| PVX_097635 | 1           | 0             | 0            |
| PVX_097640 | 0.016473156 | 0             | 1.683493265  |
| PVX_097645 | 0.007054102 | 0             | 2.610929771  |
| PVX_097650 | 1           | 0             | 0            |
| PVX_097655 | 0.166224591 | 0             | 0.672399186  |
| PVX_097660 | 0.001084333 | 0             | 2.732081615  |
| PVX_097665 | 0.036687443 | 0             | 1.084936822  |
| PVX_097670 | 0.359317338 | 0             | 0.276953736  |
| PVX_097675 | 0.078805602 | 0             | 0.794567565  |
| PVX_097680 | 1           | 0             | 0            |
| PVX_097685 | 0.359317338 | 0             | 0.237235513  |
| PVX_097690 | 0.166224591 | 0             | 0.398569523  |
| PVX_097695 | 0.359317338 | 0             | 0.126575939  |
| PVX_097700 | 1           | 0             | 0            |
| PVX_097705 | 0.359317338 | 0             | 0.125953995  |
| PVX_097710 | 0.359317338 | 0             | 0.306885202  |
| PVX_097715 | 0.078805602 | 0             | 1.181666531  |
| PVX_097720 | 0.359317338 | 0             | 0.192760116  |
| PVX_097725 | 0.359317338 | 0             | 0.248959046  |
| PVX_097730 | 0.036687443 | 0             | 1.458315348  |
| PVX_097735 | 0.007054102 | 0             | 2.415742191  |
| PVX_097740 | 1.03E-05    | 0             | 5.305454999  |
| PVX_097745 | 0.078805602 | 0             | 1.257471571  |
| PVX_097750 | 0.359317338 | 0             | 0.282629531  |
| PVX_097755 | 0.359317338 | 0             | 0.184002902  |
| PVX_097760 | 0.000125309 | 0             | 5.430130463  |
| PVX_097765 | 0.007054102 | 0             | 2.03989024   |
| PVX_097770 | 0.000383392 | 0             | 2.614657236  |
| PVX_097772 | 0.359317338 | 0             | 0.408601116  |
| PVX_097775 | 0.016473156 | 0             | 1.323624628  |
| PVX_097780 | 1           | 0             | 0            |
| PVX_097785 | 0.036687443 | 0             | 1.128509011  |
| PVX_097787 | 1           | 0             | 0            |
| PVX_097790 | 0.359317338 | 0             | 0.391750625  |
| PVX_097795 | 0.007054102 | 0             | 1.665352104  |
| PVX_097800 | 0.001084333 | 0             | 1.443846021  |
| PVX_097805 | 0.359317338 | 0             | 0.248542098  |
| PVX_097810 | 0.036687443 | 0             | 0.784287479  |

| GeneID     | Pvalue      | BackGroundPre | BackGroundDx |
|------------|-------------|---------------|--------------|
| PVX_097815 | 0.007054102 | 0             | 1.254670879  |
| PVX_097820 | 1           | 0             | 0            |
| PVX_097825 | 0.036687443 | 0             | 1.229210345  |
| PVX_097830 | 0.000383392 | 0             | 3.224008006  |
| PVX_097835 | 0.002855585 | 0             | 2.057734809  |
| PVX_097840 | 0.078805602 | 0             | 0.971533094  |
| PVX_097845 | 0.036687443 | 0             | 1.258439135  |
| PVX_097850 | 0.036687443 | 0             | 1.424021505  |
| PVX_097852 | 0.078805602 | 0             | 1.47895747   |
| PVX_097855 | 0.078805602 | 0             | 1.2593618    |
| PVX_097860 | 0.000125309 | 0             | 4.297330007  |
| PVX_097865 | 0.002855585 | 0             | 3.04965904   |
| PVX_097870 | 0.166224591 | 0             | 0.562976253  |
| PVX_097875 | 1           | 0             | 0            |
| PVX_097885 | 0.007054102 | 0             | 1.202727517  |
| PVX_097890 | 1           | 0             | 0            |
| PVX_097895 | 0.078805602 | 0             | 0.69702318   |
| PVX_097900 | 0.002855585 | 0             | 2.099561817  |
| PVX_097905 | 0.016473156 | 0             | 1.646489642  |
| PVX_097910 | 0.359317338 | 0             | 0.368759372  |
| PVX_097915 | 3.76E-05    | 0             | 5.41768376   |
| PVX_097920 | 1           | 0             | 0            |
| PVX_097925 | 1           | 0             | 0            |
| PVX_097930 | 0.359317338 | 0             | 0.330197821  |
| PVX_097935 | 1           | 0             | 0            |
| PVX_097940 | 0.078805602 | 0             | 0.793135514  |
| PVX_097945 | 3.76E-05    | 0             | 4.537610592  |
| PVX_097950 | 0.001084333 | 0             | 2.43201281   |
| PVX_097955 | 0.002855585 | 0             | 2.931699816  |
| PVX_097960 | 0.016473156 | 0             | 1.967375233  |
| PVX_097965 | 1           | 0             | 0            |
| PVX_097970 | 0.078805602 | 0             | 1.200608208  |
| PVX_097975 | 0.016473156 | 0             | 1.927389108  |
| PVX_097980 | 1           | 0             | 0            |
| PVX_097985 | 1           | 0             | 0            |
| PVX_097990 | 0.036687443 | 0             | 1.668055339  |
| PVX_097995 | 0.016473156 | 0             | 1.394649331  |
| PVX_098000 | 0.078805602 | 0             | 1.014072591  |
| PVX_098005 | 1           | 0             | 0            |
| PVX_098010 | 0.016473156 | 0             | 0.943296931  |
| PVX_098015 | 0.036687443 | 0             | 1.488034099  |

| GeneID     | Pvalue      | BackGroundPre | BackGroundDx |
|------------|-------------|---------------|--------------|
| PVX_098020 | 0.166224591 | 0             | 0.505054334  |
| PVX_098022 | 0.359317338 | 0             | 0.482679711  |
| PVX_098023 | 0.166224591 | 0             | 0.915562103  |
| PVX_098025 | 0.000125309 | 0             | 2.894467718  |
| PVX_098030 | 1           | 0             | 0            |
| PVX_098035 | 0.036687443 | 0             | 1.283031149  |
| PVX_098040 | 0.001084333 | 0             | 3.063098086  |
| PVX_098045 | 0.359317338 | 0             | 0.350152277  |
| PVX_098050 | 0.002855585 | 0             | 2.152488876  |
| PVX_098055 | 0.007054102 | 0             | 2.122549706  |
| PVX_098060 | 0.359317338 | 0             | 0.270127441  |
| PVX_098065 | 0.007054102 | 0             | 1.464094409  |
| PVX_098070 | 0.002855585 | 0             | 2.238960566  |
| PVX_098075 | 0.166224591 | 0             | 0.653776849  |
| PVX_098080 | 0.036687443 | 0             | 1.311095321  |
| PVX_098085 | 0.078805602 | 0             | 0.911334036  |
| PVX_098582 | 1           | 0             | 0            |
| PVX_098585 | 0.359317338 | 0             | 0.095514957  |
| PVX_098590 | 1           | 0             | 0            |
| PVX_098595 | 0.016473156 | 0             | 2.174647516  |
| PVX_098600 | 0.078805602 | 0             | 1.101479127  |
| PVX_098605 | 0.016473156 | 0             | 1.967137941  |
| PVX_098610 | 0.166224591 | 0             | 0.306096285  |
| PVX_098615 | 0.000125309 | 0             | 2.667216285  |
| PVX_098620 | 0.002855585 | 0             | 1.940624046  |
| PVX_098625 | 1           | 0             | 0            |
| PVX_098630 | 0.007054102 | 0             | 1.963990544  |
| PVX_098635 | 1           | 0             | 0            |
| PVX_098640 | 1.03E-05    | 0             | 5.873905522  |
| PVX_098645 | 0.007054102 | 0             | 2.608266194  |
| PVX_098650 | 0.007054102 | 0             | 1.579826548  |
| PVX_098655 | 0.166224591 | 0             | 0.642934897  |
| PVX_098660 | 0.359317338 | 0             | 0.312914873  |
| PVX_098665 | 0.078805602 | 0             | 1.163788061  |
| PVX_098670 | 0.078805602 | 0             | 1.318699736  |
| PVX_098675 | 0.002855585 | 0             | 1.797748815  |
| PVX_098680 | 0.359317338 | 0             | 0.382898619  |
| PVX_098685 | 0.000383392 | 0             | 3.285078517  |
| PVX_098690 | 0.002855585 | 0             | 2.012104224  |
| PVX_098695 | 0.016473156 | 0             | 1.986341705  |
| PVX_098700 | 0.007054102 | 0             | 1.562412431  |

| GeneID     | Pvalue      | BackGroundPre | BackGroundDx |
|------------|-------------|---------------|--------------|
| PVX_098705 | 0.036687443 | 0             | 1.104083861  |
| PVX_098710 | 1           | 0             | 0            |
| PVX_098712 | 0.359317338 | 0             | 0.358074798  |
| PVX_098715 | 1           | 0             | 0            |
| PVX_098720 | 1           | 0             | 0            |
| PVX_098725 | 0.007054102 | 0             | 1.85324284   |
| PVX_098730 | 0.016473156 | 0             | 1.339151812  |
| PVX_098735 | 0.016473156 | 0             | 1.707998665  |
| PVX_098740 | 0.078805602 | 0             | 0.467802109  |
| PVX_098745 | 0.007054102 | 0             | 1.301272803  |
| PVX_098750 | 0.359317338 | 0             | 0.321778688  |
| PVX_098755 | 0.166224591 | 0             | 0.654039484  |
| PVX_098760 | 0.016473156 | 0             | 1.808830753  |
| PVX_098765 | 1           | 0             | 0            |
| PVX_098770 | 1           | 0             | 0            |
| PVX_098775 | 0.002855585 | 0             | 2.407777853  |
| PVX_098780 | 0.002855585 | 0             | 2.435956767  |
| PVX_098784 | 0.078805602 | 0             | 1.587524212  |
| PVX_098786 | 0.036687443 | 0             | 1.563886464  |
| PVX_098795 | 0.036687443 | 0             | 1.769694294  |
| PVX_098800 | 0.007054102 | 0             | 1.58097958   |
| PVX_098805 | 0.036687443 | 0             | 0.947667301  |
| PVX_098810 | 0.036687443 | 0             | 1.552347779  |
| PVX_098815 | 0.000383392 | 0             | 3.178562516  |
| PVX_098820 | 0.359317338 | 0             | 0.340725447  |
| PVX_098825 | 0.001084333 | 0             | 2.843302329  |
| PVX_098830 | 0.000125309 | 0             | 4.129061781  |
| PVX_098835 | 0.036687443 | 0             | 1.68671613   |
| PVX_098840 | 0.078805602 | 0             | 1.078187256  |
| PVX_098845 | 0.078805602 | 0             | 0.938775527  |
| PVX_098847 | 0.078805602 | 0             | 0.805327961  |
| PVX_098850 | 0.078805602 | 0             | 0.593709152  |
| PVX_098855 | 0.002855585 | 0             | 2.545230235  |
| PVX_098860 | 0.166224591 | 0             | 0.677724863  |
| PVX_098865 | 0.359317338 | 0             | 0.116996454  |
| PVX_098870 | 0.036687443 | 0             | 1.390263614  |
| PVX_098875 | 0.078805602 | 0             | 1.128625189  |
| PVX_098880 | 0.007054102 | 0             | 2.050193968  |
| PVX_098885 | 0.036687443 | 0             | 1.020095845  |
| PVX_098890 | 0.007054102 | 0             | 1.919448081  |
| PVX_098895 | 0.359317338 | 0             | 0.204922991  |

| GeneID     | Pvalue      | BackGroundPre | BackGroundDx |
|------------|-------------|---------------|--------------|
| PVX_098900 | 1           | 0             | 0            |
| PVX_098905 | 0.036687443 | 0             | 1.854514011  |
| PVX_098910 | 0.007054102 | 0             | 1.616583122  |
| PVX_098915 | 0.359317338 | 0             | 0.414407657  |
| PVX_098920 | 0.016473156 | 0             | 1.467029876  |
| PVX_098925 | 0.036687443 | 0             | 0.944946822  |
| PVX_098930 | 0.359317338 | 0             | 0.446439167  |
| PVX_098935 | 0.007054102 | 0             | 1.548125991  |
| PVX_098940 | 0.359317338 | 0             | 0.195215282  |
| PVX_098945 | 0.000125309 | 0             | 3.230732161  |
| PVX_098950 | 0.000125309 | 0             | 2.59301774   |
| PVX_098955 | 0.016473156 | 0             | 1.53519315   |
| PVX_098960 | 0.036687443 | 0             | 1.153764681  |
| PVX_098965 | 0.036687443 | 0             | 0.95828175   |
| PVX_098970 | 0.016473156 | 0             | 2.082621987  |
| PVX_098975 | 0.359317338 | 0             | 0.363951918  |
| PVX_098980 | 0.078805602 | 0             | 0.942591417  |
| PVX_098985 | 0.016473156 | 0             | 1.86305537   |
| PVX_098990 | 1           | 0             | 0            |
| PVX_098995 | 1           | 0             | 0            |
| PVX_099000 | 0.359317338 | 0             | 0.281949147  |
| PVX_099005 | 0.359317338 | 0             | 0.087313709  |
| PVX_099010 | 0.016473156 | 0             | 1.350665256  |
| PVX_099015 | 0.359317338 | 0             | 0.308496751  |
| PVX_099020 | 0.007054102 | 0             | 2.098735446  |
| PVX_099025 | 0.002855585 | 0             | 2.388372393  |
| PVX_099030 | 0.166224591 | 0             | 0.546658688  |
| PVX_099035 | 0.000383392 | 0             | 3.941866265  |
| PVX_099040 | 0.036687443 | 0             | 1.185609469  |
| PVX_099045 | 0.036687443 | 0             | 1.198278383  |
| PVX_099050 | 1           | 0             | 0            |
| PVX_099055 | 0.036687443 | 0             | 1.291467814  |
| PVX_099060 | 0.016473156 | 0             | 1.517293421  |
| PVX_099065 | 0.359317338 | 0             | 0.155225333  |
| PVX_099070 | 0.166224591 | 0             | 1.125356153  |
| PVX_099075 | 0.016473156 | 0             | 1.59956324   |
| PVX_099080 | 0.002855585 | 0             | 2.957793416  |
| PVX_099085 | 0.001084333 | 0             | 3.295562622  |
| PVX_099090 | 1           | 0             | 0            |
| PVX_099095 | 3.76E-05    | 0             | 5.291695161  |
| PVX_099100 | 0.036687443 | 0             | 1.206222235  |



| GeneID     | Pvalue      | BackGroundPre | BackGroundDx |
|------------|-------------|---------------|--------------|
| PVX_099105 | 0.359317338 | 0             | 0.360417094  |
| PVX_099107 | 0.078805602 | 0             | 0.901797726  |
| PVX_099110 | 0.016473156 | 0             | 1.312909894  |
| PVX_099115 | 0.007054102 | 0             | 1.824943163  |
| PVX_099117 | 1           | 0             | 0            |
| PVX_099120 | 0.016473156 | 0             | 1.312011235  |
| PVX_099125 | 0.002855585 | 0             | 2.187488341  |
| PVX_099130 | 0.078805602 | 0             | 0.628664156  |
| PVX_099135 | 0.007054102 | 0             | 1.96823417   |
| PVX_099140 | 0.016473156 | 0             | 1.352621211  |
| PVX_099145 | 0.078805602 | 0             | 1.137052824  |
| PVX_099150 | 0.166224591 | 0             | 0.416304212  |
| PVX_099155 | 0.359317338 | 0             | 0.483004053  |
| PVX_099160 | 0.166224591 | 0             | 0.678650474  |
| PVX_099165 | 1           | 0             | 0            |
| PVX_099170 | 1           | 0             | 0            |
| PVX_099175 | 0.001084333 | 0             | 2.496468733  |
| PVX_099180 | 0.166224591 | 0             | 0.624713057  |
| PVX_099185 | 0.078805602 | 0             | 1.422665678  |
| PVX_099190 | 0.036687443 | 0             | 1.488347707  |
| PVX_099195 | 0.016473156 | 0             | 1.682169766  |
| PVX_099200 | 0.000125309 | 0             | 3.547786975  |
| PVX_099205 | 0.166224591 | 0             | 0.478434719  |
| PVX_099210 | 0.036687443 | 0             | 1.809460519  |
| PVX_099215 | 0.078805602 | 0             | 0.952833874  |
| PVX_099220 | 1           | 0             | 0            |
| PVX_099225 | 0.166224591 | 0             | 0.704864794  |
| PVX_099230 | 0.359317338 | 0             | 0.166650582  |
| PVX_099235 | 0.166224591 | 0             | 0.680463237  |
| PVX_099240 | 0.016473156 | 0             | 1.475855912  |
| PVX_099245 | 1           | 0             | 0            |
| PVX_099247 | 0.002855585 | 0             | 1.839599527  |
| PVX_099250 | 0.016473156 | 0             | 1.956071905  |
| PVX_099255 | 0.007054102 | 0             | 1.652274397  |
| PVX_099257 | 0.359317338 | 0             | 0.362379166  |
| PVX_099263 | 0.359317338 | 0             | 0.685653811  |
| PVX_099265 | 0.359317338 | 0             | 0.354465309  |
| PVX_099270 | 0.036687443 | 0             | 0.88245093   |
| PVX_099275 | 0.002855585 | 0             | 2.35352474   |
| PVX_099280 | 1           | 0             | 0            |
| PVX_099285 | 1           | 0             | 0            |

| GeneID     | Pvalue      | BackGroundPre | BackGroundDx |
|------------|-------------|---------------|--------------|
| PVX_099290 | 1           | 0             | 0            |
| PVX_099295 | 0.001084333 | 0             | 2.619700635  |
| PVX_099300 | 0.007054102 | 0             | 2.038592626  |
| PVX_099305 | 0.166224591 | 0             | 0.608451464  |
| PVX_099310 | 0.016473156 | 0             | 2.137121677  |
| PVX_099315 | 1.03E-05    | 0             | 6.24636989   |
| PVX_099320 | 0.036687443 | 0             | 1.398436488  |
| PVX_099325 | 0.016473156 | 0             | 2.359957828  |
| PVX_099330 | 0.078805602 | 0             | 1.164327618  |
| PVX_099335 | 0.001084333 | 0             | 3.854051708  |
| PVX_099340 | 0.078805602 | 0             | 0.682238821  |
| PVX_099345 | 0.016473156 | 0             | 1.547609184  |
| PVX_099350 | 1           | 0             | 0            |
| PVX_099355 | 0.007054102 | 0             | 2.013507949  |
| PVX_099360 | 0.000125309 | 0             | 3.455246952  |
| PVX_099365 | 1.03E-05    | 0             | 6.02233149   |
| PVX_099370 | 0.002855585 | 0             | 2.586817196  |
| PVX_099375 | 1           | 0             | 0            |
| PVX_099380 | 1           | 0             | 0            |
| PVX_099385 | 0.007054102 | 0             | 1.934974287  |
| PVX_099390 | 0.001084333 | 0             | 2.90361071   |
| PVX_099395 | 0.002855585 | 0             | 2.564042156  |
| PVX_099400 | 0.036687443 | 0             | 1.442876933  |
| PVX_099405 | 0.016473156 | 0             | 1.358149298  |
| PVX_099410 | 0.359317338 | 0             | 0.137222028  |
| PVX_099415 | 0.078805602 | 0             | 0.970952978  |
| PVX_099420 | 0.016473156 | 0             | 1.896183161  |
| PVX_099425 | 0.002855585 | 0             | 2.186601239  |
| PVX_099430 | 1           | 0             | 0            |
| PVX_099435 | 0.001084333 | 0             | 2.098945613  |
| PVX_099440 | 0.359317338 | 0             | 0.414382846  |
| PVX_099445 | 0.007054102 | 0             | 1.671631179  |
| PVX_099450 | 1           | 0             | 0            |
| PVX_099455 | 0.000125309 | 0             | 4.22642081   |
| PVX_099460 | 0.016473156 | 0             | 1.916233922  |
| PVX_099465 | 0.000125309 | 0             | 4.651803471  |
| PVX_099470 | 0.359317338 | 0             | 0.169448055  |
| PVX_099475 | 0.078805602 | 0             | 1.196924346  |
| PVX_099480 | 0.000383392 | 0             | 2.511479978  |
| PVX_099485 | 0.166224591 | 0             | 0.683063974  |
| PVX_099490 | 0.036687443 | 0             | 1.516868544  |

| GeneID     | Pvalue      | BackGroundPre | BackGroundDx |
|------------|-------------|---------------|--------------|
| PVX_099495 | 0.007054102 | 0             | 2.119769317  |
| PVX_099500 | 0.007054102 | 0             | 1.322684031  |
| PVX_099505 | 0.016473156 | 0             | 1.613114755  |
| PVX_099507 | 0.036687443 | 0             | 1.300560292  |
| PVX_099510 | 0.001084333 | 0             | 3.036136385  |
| PVX_099515 | 0.359317338 | 0             | 0.179504964  |
| PVX_099520 | 0.000125309 | 0             | 3.503107038  |
| PVX_099525 | 3.76E-05    | 0             | 5.822286303  |
| PVX_099528 | 1           | 0             | 0            |
| PVX_099530 | 0.036687443 | 0             | 1.047670197  |
| PVX_099535 | 1.03E-05    | 0             | 7.268627144  |
| PVX_099540 | 0.002855585 | 0             | 2.46531703   |
| PVX_099545 | 0.002855585 | 0             | 2.599204815  |
| PVX_099550 | 0.001084333 | 0             | 1.708254887  |
| PVX_099555 | 1           | 0             | 0            |
| PVX_099560 | 0.036687443 | 0             | 1.462630299  |
| PVX_099565 | 0.078805602 | 0             | 1.166925692  |
| PVX_099570 | 0.016473156 | 0             | 1.324859173  |
| PVX_099575 | 0.359317338 | 0             | 0.185745149  |
| PVX_099580 | 0.007054102 | 0             | 1.832649861  |
| PVX_099585 | 1           | 0             | 0            |
| PVX_099590 | 0.007054102 | 0             | 2.312205965  |
| PVX_099595 | 0.359317338 | 0             | 0.318085715  |
| PVX_099600 | 0.000383392 | 0             | 3.572337094  |
| PVX_099605 | 0.007054102 | 0             | 2.615804554  |
| PVX_099610 | 0.359317338 | 0             | 0.626220142  |
| PVX_099615 | 0.078805602 | 0             | 0.712600629  |
| PVX_099620 | 0.036687443 | 0             | 1.186793774  |
| PVX_099625 | 0.036687443 | 0             | 0.856401652  |
| PVX_099630 | 0.016473156 | 0             | 1.740413509  |
| PVX_099635 | 0.002855585 | 0             | 2.140161442  |
| PVX_099640 | 0.359317338 | 0             | 0.34687863   |
| PVX_099645 | 0.078805602 | 0             | 0.481975027  |
| PVX_099650 | 0.001084333 | 0             | 2.791596938  |
| PVX_099655 | 1           | 0             | 0            |
| PVX_099660 | 1           | 0             | 0            |
| PVX_099665 | 1           | 0             | 0            |
| PVX_099670 | 1           | 0             | 0            |
| PVX_099675 | 0.036687443 | 0             | 1.299545042  |
| PVX_099680 | 0.016473156 | 0             | 1.671414776  |
| PVX_099685 | 0.007054102 | 0             | 1.629054365  |

| GeneID     | Pvalue      | BackGroundPre | BackGroundDx |
|------------|-------------|---------------|--------------|
| PVX_099690 | 0.016473156 | 0             | 2.367218515  |
| PVX_099695 | 0.078805602 | 0             | 1.150016598  |
| PVX_099700 | 0.002855585 | 0             | 2.490650233  |
| PVX_099705 | 0.016473156 | 0             | 1.161838247  |
| PVX_099710 | 0.000383392 | 0             | 3.947883183  |
| PVX_099715 | 0.002855585 | 0             | 2.015163091  |
| PVX_099725 | 0.001084333 | 0             | 1.980734141  |
| PVX_099735 | 0.359317338 | 0             | 0.406397384  |
| PVX_099740 | 0.036687443 | 0             | 1.030388116  |
| PVX_099745 | 0.036687443 | 0             | 1.220757951  |
| PVX_099750 | 0.016473156 | 0             | 1.36983782   |
| PVX_099755 | 1           | 0             | 0            |
| PVX_099760 | 0.359317338 | 0             | 0.201783966  |
| PVX_099765 | 3.76E-05    | 0             | 3.87750983   |
| PVX_099770 | 0.016473156 | 0             | 1.288431765  |
| PVX_099780 | 0.078805602 | 0             | 1.149305641  |
| PVX_099785 | 0.036687443 | 0             | 1.750171398  |
| PVX_099790 | 0.001084333 | 0             | 3.900325471  |
| PVX_099800 | 0.166224591 | 0             | 0.446139172  |
| PVX_099805 | 0.036687443 | 0             | 1.380649678  |
| PVX_099810 | 0.359317338 | 0             | 0.178659504  |
| PVX_099815 | 1           | 0             | 0            |
| PVX_099820 | 0.002855585 | 0             | 2.370367826  |
| PVX_099825 | 0.001084333 | 0             | 3.410925275  |
| PVX_099830 | 0.007054102 | 0             | 2.180904064  |
| PVX_099835 | 0.166224591 | 0             | 1.124226764  |
| PVX_099840 | 0.007054102 | 0             | 2.258362984  |
| PVX_099845 | 0.078805602 | 0             | 1.202587788  |
| PVX_099850 | 0.359317338 | 0             | 0.301068234  |
| PVX_099855 | 0.166224591 | 0             | 0.572984576  |
| PVX_099860 | 0.166224591 | 0             | 0.694392565  |
| PVX_099870 | 0.036687443 | 0             | 1.525367015  |
| PVX_099875 | 1           | 0             | 0            |
| PVX_099880 | 1           | 0             | 0            |
| PVX_099885 | 0.007054102 | 0             | 1.369750151  |
| PVX_099890 | 0.016473156 | 0             | 1.679479299  |
| PVX_099895 | 0.078805602 | 0             | 1.289162897  |
| PVX_099900 | 0.166224591 | 0             | 0.712668745  |
| PVX_099905 | 0.036687443 | 0             | 1.364585659  |
| PVX_099910 | 0.166224591 | 0             | 0.600076313  |
| PVX_099915 | 0.000125309 | 0             | 4.181068702  |

| GeneID     | Pvalue      | BackGroundPre | BackGroundDx |
|------------|-------------|---------------|--------------|
| PVX_099920 | 0.166224591 | 0             | 0.576407367  |
| PVX_099930 | 0.007054102 | 0             | 1.592035658  |
| PVX_099935 | 1           | 0             | 0            |
| PVX_099940 | 0.359317338 | 0             | 0.415091385  |
| PVX_099944 | 0.007054102 | 0             | 2.301506189  |
| PVX_099946 | 0.359317338 | 0             | 0.434190304  |
| PVX_099955 | 1           | 0             | 0            |
| PVX_099960 | 0.016473156 | 0             | 1.53242451   |
| PVX_099965 | 0.016473156 | 0             | 1.401793368  |
| PVX_099970 | 1           | 0             | 0            |
| PVX_099975 | 1           | 0             | 0            |
| PVX_099980 | 0.166224591 | 0             | 0.417909345  |
| PVX_099985 | 0.000383392 | 0             | 2.907593551  |
| PVX_099990 | 0.007054102 | 0             | 1.424613641  |
| PVX_099995 | 0.007054102 | 0             | 1.917862933  |
| PVX_100000 | 0.078805602 | 0             | 1.005027269  |
| PVX_100005 | 0.016473156 | 0             | 0.847541144  |
| PVX_100010 | 0.359317338 | 0             | 0.303770736  |
| PVX_100510 | 1           | 0             | 0            |
| PVX_100515 | 0.166224591 | 0             | 0.26785542   |
| PVX_100520 | 0.359317338 | 0             | 0.439735676  |
| PVX_100525 | 0.078805602 | 0             | 0.601818858  |
| PVX_100530 | 0.036687443 | 0             | 1.667112466  |
| PVX_100535 | 0.016473156 | 0             | 1.204087102  |
| PVX_100540 | 0.001084333 | 0             | 2.437788625  |
| PVX_100545 | 0.016473156 | 0             | 1.779145265  |
| PVX_100550 | 0.000383392 | 0             | 3.481287385  |
| PVX_100555 | 0.001084333 | 0             | 2.892246756  |
| PVX_100560 | 0.000383392 | 0             | 3.618715512  |
| PVX_100565 | 0.359317338 | 0             | 0.223128001  |
| PVX_100570 | 0.359317338 | 0             | 0.17700061   |
| PVX_100575 | 0.359317338 | 0             | 0.411415131  |
| PVX_100580 | 0.036687443 | 0             | 1.121697458  |
| PVX_100590 | 0.359317338 | 0             | 0.503399388  |
| PVX_100595 | 0.007054102 | 0             | 2.00582634   |
| PVX_100600 | 0.001084333 | 0             | 2.790150825  |
| PVX_100610 | 0.001084333 | 0             | 3.43701995   |
| PVX_100620 | 0.359317338 | 0             | 0.171908904  |
| PVX_100625 | 0.016473156 | 0             | 1.26050331   |
| PVX_100630 | 0.007054102 | 0             | 2.210306784  |
| PVX_100635 | 3.76E-05    | 0             | 2.838653577  |

| GeneID     | Pvalue      | BackGroundPre | BackGroundDx |
|------------|-------------|---------------|--------------|
| PVX_100640 | 0.036687443 | 0             | 1.47494592   |
| PVX_100645 | 0.001084333 | 0             | 3.428741579  |
| PVX_100650 | 0.007054102 | 0             | 1.559382662  |
| PVX_100655 | 0.078805602 | 0             | 1.02526591   |
| PVX_100657 | 0.002855585 | 0             | 1.570904032  |
| PVX_100660 | 0.036687443 | 0             | 0.890944825  |
| PVX_100665 | 0.000383392 | 0             | 2.30697162   |
| PVX_100670 | 1           | 0             | 0            |
| PVX_100675 | 0.002855585 | 0             | 2.737025793  |
| PVX_100680 | 0.007054102 | 0             | 1.810244165  |
| PVX_100685 | 0.166224591 | 0             | 0.584237302  |
| PVX_100690 | 3.76E-05    | 0             | 3.668516976  |
| PVX_100695 | 0.001084333 | 0             | 3.649265335  |
| PVX_100700 | 1           | 0             | 0            |
| PVX_100705 | 0.001084333 | 0             | 3.977485042  |
| PVX_100710 | 0.166224591 | 0             | 0.526314516  |
| PVX_100715 | 0.000125309 | 0             | 3.151651601  |
| PVX_100720 | 0.007054102 | 0             | 1.966486995  |
| PVX_100725 | 0.016473156 | 0             | 1.443036421  |
| PVX_100730 | 0.000125309 | 0             | 4.022175316  |
| PVX_100735 | 0.001084333 | 0             | 3.082528975  |
| PVX_100740 | 0.036687443 | 0             | 0.815479251  |
| PVX_100745 | 0.001084333 | 0             | 2.664560156  |
| PVX_100750 | 0.036687443 | 0             | 1.541107415  |
| PVX_100755 | 0.016473156 | 0             | 1.793847371  |
| PVX_100760 | 0.359317338 | 0             | 0.262026697  |
| PVX_100765 | 0.016473156 | 0             | 1.767248269  |
| PVX_100770 | 0.007054102 | 0             | 2.195861402  |
| PVX_100775 | 1           | 0             | 0            |
| PVX_100780 | 1           | 0             | 0            |
| PVX_100785 | 0.016473156 | 0             | 1.499732589  |
| PVX_100790 | 0.078805602 | 0             | 0.975770698  |
| PVX_100795 | 0.036687443 | 0             | 1.554430487  |
| PVX_100800 | 0.007054102 | 0             | 1.868714868  |
| PVX_100805 | 0.000125309 | 0             | 2.668956485  |
| PVX_100810 | 0.002855585 | 0             | 2.156010105  |
| PVX_100815 | 0.166224591 | 0             | 0.585436813  |
| PVX_100820 | 0.002855585 | 0             | 2.60659861   |
| PVX_100825 | 0.007054102 | 0             | 1.536472362  |
| PVX_100830 | 0.001084333 | 0             | 2.891387912  |
| PVX_100835 | 0.000383392 | 0             | 3.832958823  |

| GeneID     | Pvalue      | BackGroundPre | BackGroundDx |
|------------|-------------|---------------|--------------|
| PVX_100840 | 0.078805602 | 0             | 1.122565194  |
| PVX_100845 | 0.007054102 | 0             | 2.048930128  |
| PVX_100850 | 1           | 0             | 0            |
| PVX_100855 | 0.000383392 | 0             | 3.558685524  |
| PVX_100860 | 1           | 0             | 0            |
| PVX_100865 | 0.002855585 | 0             | 1.87232319   |
| PVX_100870 | 0.359317338 | 0             | 0.271603823  |
| PVX_100875 | 0.036687443 | 0             | 0.871043465  |
| PVX_100880 | 0.078805602 | 0             | 0.897723864  |
| PVX_100885 | 0.001084333 | 0             | 2.822695079  |
| PVX_100890 | 0.000383392 | 0             | 3.399296532  |
| PVX_100895 | 1           | 0             | 0            |
| PVX_100900 | 0.036687443 | 0             | 1.050713659  |
| PVX_100905 | 0.002855585 | 0             | 2.838497497  |
| PVX_100910 | 0.000383392 | 0             | 2.565039486  |
| PVX_100915 | 0.166224591 | 0             | 0.58983348   |
| PVX_100920 | 1           | 0             | 0            |
| PVX_100925 | 0.002855585 | 0             | 2.224326911  |
| PVX_100930 | 0.007054102 | 0             | 2.038380428  |
| PVX_100935 | 0.001084333 | 0             | 2.764978811  |
| PVX_100940 | 0.078805602 | 0             | 0.594528306  |
| PVX_100945 | 0.359317338 | 0             | 0.219267096  |
| PVX_100950 | 0.078805602 | 0             | 0.865691176  |
| PVX_100955 | 0.007054102 | 0             | 2.343708686  |
| PVX_100960 | 0.016473156 | 0             | 1.034436838  |
| PVX_100965 | 0.002855585 | 0             | 2.407274422  |
| PVX_100970 | 1           | 0             | 0            |
| PVX_100975 | 0.016473156 | 0             | 1.64434147   |
| PVX_100980 | 0.000383392 | 0             | 3.337793098  |
| PVX_100985 | 0.002855585 | 0             | 2.757035173  |
| PVX_100990 | 0.002855585 | 0             | 1.998940148  |
| PVX_100995 | 0.016473156 | 0             | 1.754411913  |
| PVX_101000 | 0.359317338 | 0             | 0.215091269  |
| PVX_101005 | 0.359317338 | 0             | 0.72160676   |
| PVX_101010 | 0.000125309 | 0             | 3.81385263   |
| PVX_101015 | 0.016473156 | 0             | 1.976192513  |
| PVX_101020 | 0.016473156 | 0             | 1.846483122  |
| PVX_101025 | 0.007054102 | 0             | 2.336376713  |
| PVX_101030 | 0.078805602 | 0             | 0.889165427  |
| PVX_101035 | 1.03E-05    | 0             | 6.49517517   |
| PVX_101040 | 0.001084333 | 0             | 3.58849748   |

| GeneID     | Pvalue      | BackGroundPre | BackGroundDx |
|------------|-------------|---------------|--------------|
| PVX_101045 | 0.016473156 | 0             | 2.285731842  |
| PVX_101050 | 0.016473156 | 0             | 1.861685949  |
| PVX_101055 | 0.036687443 | 0             | 1.264588441  |
| PVX_101060 | 0.002855585 | 0             | 2.73943221   |
| PVX_101065 | 1           | 0             | 0            |
| PVX_101070 | 0.359317338 | 0             | 0.236075128  |
| PVX_101075 | 0.359317338 | 0             | 0.359411258  |
| PVX_101080 | 0.002855585 | 0             | 2.85382153   |
| PVX_101085 | 1           | 0             | 0            |
| PVX_101090 | 0.002855585 | 0             | 2.825511028  |
| PVX_101095 | 0.359317338 | 0             | 0.213857244  |
| PVX_101100 | 0.016473156 | 0             | 1.529361839  |
| PVX_101105 | 0.000383392 | 0             | 2.869454537  |
| PVX_101110 | 0.000383392 | 0             | 3.230997172  |
| PVX_101115 | 0.016473156 | 0             | 1.566899691  |
| PVX_101120 | 0.166224591 | 0             | 0.787999277  |
| PVX_101125 | 0.359317338 | 0             | 0.41306419   |
| PVX_101130 | 0.036687443 | 0             | 1.806851414  |
| PVX_101135 | 0.000125309 | 0             | 4.042443826  |
| PVX_101140 | 0.166224591 | 0             | 0.440887583  |
| PVX_101145 | 0.016473156 | 0             | 1.773154319  |
| PVX_101150 | 0.166224591 | 0             | 0.515892481  |
| PVX_101155 | 0.036687443 | 0             | 1.182944396  |
| PVX_101160 | 0.078805602 | 0             | 1.314359799  |
| PVX_101165 | 0.016473156 | 0             | 1.879014598  |
| PVX_101170 | 0.002855585 | 0             | 2.752200367  |
| PVX_101175 | 0.166224591 | 0             | 0.314044926  |
| PVX_101180 | 0.078805602 | 0             | 1.102337896  |
| PVX_101185 | 0.078805602 | 0             | 1.031502606  |
| PVX_101190 | 0.007054102 | 0             | 2.179179373  |
| PVX_101195 | 0.166224591 | 0             | 0.610450168  |
| PVX_101200 | 0.001084333 | 0             | 3.369617563  |
| PVX_101205 | 0.359317338 | 0             | 0.181824152  |
| PVX_101210 | 0.359317338 | 0             | 0.204682492  |
| PVX_101215 | 0.166224591 | 0             | 0.787191811  |
| PVX_101220 | 0.166224591 | 0             | 0.753372343  |
| PVX_101225 | 0.016473156 | 0             | 1.716207911  |
| PVX_101230 | 0.078805602 | 0             | 1.032658974  |
| PVX_101235 | 0.036687443 | 0             | 1.437573086  |
| PVX_101240 | 0.078805602 | 0             | 0.730771764  |
| PVX_101245 | 0.166224591 | 0             | 0.665823786  |



| GeneID     | Pvalue      | BackGroundPre | BackGroundDx |
|------------|-------------|---------------|--------------|
| PVX_101250 | 0.036687443 | 0             | 1.218276961  |
| PVX_101255 | 0.036687443 | 0             | 1.012387125  |
| PVX_101257 | 0.078805602 | 0             | 0.884105961  |
| PVX_101260 | 3.76E-05    | 0             | 4.798648133  |
| PVX_101265 | 0.007054102 | 0             | 1.897439294  |
| PVX_101269 | 0.016473156 | 0             | 1.474576489  |
| PVX_101271 | 1           | 0             | 0            |
| PVX_101275 | 1           | 0             | 0            |
| PVX_101280 | 1           | 0             | 0            |
| PVX_101285 | 0.036687443 | 0             | 1.515820097  |
| PVX_101290 | 0.166224591 | 0             | 0.92418111   |
| PVX_101295 | 0.016473156 | 0             | 1.886191459  |
| PVX_101300 | 0.078805602 | 0             | 0.944363249  |
| PVX_101305 | 0.078805602 | 0             | 1.148485239  |
| PVX_101310 | 1           | 0             | 0            |
| PVX_101315 | 0.000125309 | 0             | 4.747999712  |
| PVX_101320 | 0.001084333 | 0             | 2.710045538  |
| PVX_101325 | 0.078805602 | 0             | 0.54405432   |
| PVX_101330 | 1           | 0             | 0            |
| PVX_101335 | 0.000125309 | 0             | 4.471806501  |
| PVX_101340 | 0.036687443 | 0             | 1.242093628  |
| PVX_101345 | 0.007054102 | 0             | 2.374733346  |
| PVX_101350 | 1           | 0             | 0            |
| PVX_101355 | 0.007054102 | 0             | 1.800886608  |
| PVX_101360 | 0.078805602 | 0             | 1.453849462  |
| PVX_101362 | 0.036687443 | 0             | 1.66360947   |
| PVX_101365 | 0.359317338 | 0             | 0.194844474  |
| PVX_101370 | 1           | 0             | 0            |
| PVX_101375 | 1           | 0             | 0            |
| PVX_101380 | 0.166224591 | 0             | 0.971387955  |
| PVX_101385 | 0.001084333 | 0             | 1.958607895  |
| PVX_101390 | 0.016473156 | 0             | 1.508031306  |
| PVX_101395 | 0.000125309 | 0             | 4.314483335  |
| PVX_101400 | 0.166224591 | 0             | 0.395866758  |
| PVX_101405 | 0.007054102 | 0             | 1.767160739  |
| PVX_101410 | 0.078805602 | 0             | 1.152679463  |
| PVX_101415 | 0.359317338 | 0             | 0.238641409  |
| PVX_101420 | 0.002855585 | 0             | 2.915513659  |
| PVX_101425 | 0.007054102 | 0             | 2.254953976  |
| PVX_101430 | 0.078805602 | 0             | 1.095209481  |
| PVX_101435 | 0.007054102 | 0             | 1.666024646  |

| GeneID     | Pvalue      | BackGroundPre | BackGroundDx |
|------------|-------------|---------------|--------------|
| PVX_101440 | 0.078805602 | 0             | 0.764932807  |
| PVX_101442 | 1           | 0             | 0            |
| PVX_101445 | 0.036687443 | 0             | 1.207951378  |
| PVX_101450 | 1           | 0             | 0            |
| PVX_101455 | 0.007054102 | 0             | 2.474009993  |
| PVX_101460 | 0.359317338 | 0             | 0.231965873  |
| PVX_101465 | 0.036687443 | 0             | 1.22954665   |
| PVX_101470 | 0.007054102 | 0             | 1.732037032  |
| PVX_101475 | 0.007054102 | 0             | 1.858286222  |
| PVX_101480 | 0.016473156 | 0             | 1.472508689  |
| PVX_101482 | 1           | 0             | 0            |
| PVX_101484 | 1           | 0             | 0            |
| PVX_101485 | 0.166224591 | 0             | 0.285399395  |
| PVX_101490 | 0.007054102 | 0             | 3.138010061  |
| PVX_101495 | 0.166224591 | 0             | 0.33562056   |
| PVX_101500 | 0.000383392 | 0             | 2.441001115  |
| PVX_101503 | 0.359317338 | 0             | 0.425615067  |
| PVX_101505 | 1           | 0             | 0            |
| PVX_101510 | 0.007054102 | 0             | 1.911220952  |
| PVX_101515 | 0.000383392 | 0             | 4.090813594  |
| PVX_101520 | 3.76E-05    | 0             | 5.447953689  |
| PVX_101525 | 0.078805602 | 0             | 1.153426308  |
| PVX_101530 | 0.002855585 | 0             | 2.503697404  |
| PVX_101535 | 0.166224591 | 0             | 0.625972859  |
| PVX_101540 | 0.166224591 | 0             | 0.744139278  |
| PVX_101545 | 0.359317338 | 0             | 0.314821522  |
| PVX_101550 | 0.359317338 | 0             | 0.4713679    |
| PVX_101555 | 0.007054102 | 0             | 1.747074966  |
| PVX_101560 | 0.078805602 | 0             | 1.002335399  |
| PVX_101562 | 1           | 0             | 0            |
| PVX_101565 | 1           | 0             | 0            |
| PVX_101570 | 1           | 0             | 0            |
| PVX_101575 | 0.036687443 | 0             | 1.167284803  |
| PVX_101580 | 0.002855585 | 0             | 2.86006649   |
| PVX_101585 | 1           | 0             | 0            |
| PVX_101590 | 1           | 0             | 0            |
| PVX_101592 | 0.036687443 | 0             | 1.817859602  |
| PVX_101595 | 0.016473156 | 0             | 2.555302023  |
| PVX_101600 | 0.078805602 | 0             | 0.844011651  |
| PVX_101605 | 0.359317338 | 0             | 0.45802936   |
| PVX_101610 | 0.000125309 | 0             | 4.34472305   |

| GeneID     | Pvalue      | BackGroundPre | BackGroundDx |
|------------|-------------|---------------|--------------|
| PVX_101615 | 1           | 0             | 0            |
| PVX_101617 | 0.359317338 | 0             | 0.281707596  |
| PVX_101620 | 0.078805602 | 0             | 0.781040506  |
| PVX_101625 | 1           | 0             | 0            |
| PVX_101630 | 1           | 0             | 0            |
| PVX_102125 | 1           | 0             | 0            |
| PVX_102130 | 1           | 0             | 0            |
| PVX_102630 | 1           | 0             | 0            |
| PVX_102635 | 0.359317338 | 0             | 0.422948337  |
| PVX_102640 | 1           | 0             | 0            |
| PVX_102645 | 1           | 0             | 0            |
| PVX_103145 | 1           | 0             | 0            |
| PVX_103150 | 0.078805602 | 0             | 0.815267553  |
| PVX_103155 | 0.166224591 | 0             | 0.600887799  |
| PVX_103160 | 1           | 0             | 0            |
| PVX_103660 | 0.007054102 | 0             | 2.329968667  |
| PVX_103665 | 1           | 0             | 0            |
| PVX_103670 | 1           | 0             | 0            |
| PVX_103675 | 1           | 0             | 0            |
| PVX_103680 | 1           | 0             | 0            |
| PVX_104180 | 0.359317338 | 0             | 0.270259312  |
| PVX_104185 | 1           | 0             | 0            |
| PVX_104190 | 1           | 0             | 0            |
| PVX_104690 | 1           | 0             | 0            |
| PVX_104695 | 1           | 0             | 0            |
| PVX_104700 | 0.359317338 | 0             | 0.228644384  |
| PVX_105200 | 0.359317338 | 0             | 0.26060613   |
| PVX_105205 | 1           | 0             | 0            |
| PVX_105700 | 1           | 0             | 0            |
| PVX_105705 | 1           | 0             | 0            |
| PVX_105710 | 1           | 0             | 0            |
| PVX_106210 | 1           | 0             | 0            |
| PVX_106215 | 1           | 0             | 0            |
| PVX_106220 | 1           | 0             | 0            |
| PVX_106720 | 1           | 0             | 0            |
| PVX_106725 | 1           | 0             | 0            |
| PVX_106730 | 1           | 0             | 0            |
| PVX_107230 | 1           | 0             | 0            |
| PVX_107235 | 1           | 0             | 0            |
| PVX_107735 | 0.078805602 | 0             | 1.023602774  |
| PVX_107740 | 0.078805602 | 0             | 1.072094719  |

| GeneID      | Pvalue      | BackGroundPre | BackGroundDx |
|-------------|-------------|---------------|--------------|
| PVX_107745  | 0.036687443 | 0             | 1.219528023  |
| PVX_107750  | 1           | 0             | 0            |
| PVX_107755  | 1           | 0             | 0            |
| PVX_108255  | 1           | 0             | 0            |
| PVX_108260  | 1           | 0             | 0            |
| PVX_108760  | 1           | 0             | 0            |
| PVX_108765  | 1           | 0             | 0            |
| PVX_108770  | 0.078805602 | 0             | 0.838188458  |
| PVX_108775  | 1           | 0             | 0            |
| PVX_109275  | 0.359317338 | 0             | 0.319607761  |
| PVX_109280  | 0.016473156 | 0             | 1.971310179  |
| PVX_109778  | 1           | 0             | 0            |
| PVX_109780  | 1           | 0             | 0            |
| PVX_109785  | 1           | 0             | 0            |
| PVX_109790  | 0.359317338 | 0             | 0.329736631  |
| PVX_109795  | 1           | 0             | 0            |
| PVX_110295  | 1           | 0             | 0            |
| PVX_110300  | 1           | 0             | 0            |
| PVX_110805  | 1           | 0             | 0            |
| PVX_110810  | 1           | 0             | 0            |
| PVX_110815  | 1           | 0             | 0            |
| PVX_110820  | 1           | 0             | 0            |
| PVX_110822  | 0.359317338 | 0             | 0.338653963  |
| PVX_110825  | 0.002855585 | 0             | 2.166266571  |
| PVX_110830  | 0.036687443 | 0             | 1.562687809  |
| PVX_110832  | 0.016473156 | 0             | 2.046539209  |
| PVX_110834  | 0.359317338 | 0             | 0.326548289  |
| PVX_110835  | 3.76E-05    | 0             | 5.264115342  |
| PVX_110840  | 0.359317338 | 0             | 0.445714823  |
| PVX_110845  | 0.078805602 | 0             | 1.370628642  |
| PVX_110845a | 1           | 0             | 0            |
| PVX_110850  | 0.036687443 | 0             | 1.233116415  |
| PVX_110855  | 0.000383392 | 0             | 3.579587704  |
| PVX_110860  | 0.359317338 | 0             | 0.359922904  |
| PVX_110865  | 0.359317338 | 0             | 0.322605466  |
| PVX_110870  | 0.016473156 | 0             | 2.256606912  |
| PVX_110880  | 0.078805602 | 0             | 0.914934816  |
| PVX_110885  | 0.359317338 | 0             | 0.189261739  |
| PVX_110890  | 0.359317338 | 0             | 0.383448334  |
| PVX_110895  | 0.036687443 | 0             | 1.422679113  |
| PVX_110900  | 0.359317338 | 0             | 0.193901263  |

| GeneID     | Pvalue      | BackGroundPre | BackGroundDx |
|------------|-------------|---------------|--------------|
| PVX_110905 | 0.002855585 | 0             | 2.192381602  |
| PVX_110910 | 0.001084333 | 0             | 1.870438355  |
| PVX_110915 | 0.002855585 | 0             | 1.857279093  |
| PVX_110920 | 0.359317338 | 0             | 0.300676165  |
| PVX_110925 | 0.001084333 | 0             | 3.352506488  |
| PVX_110930 | 0.036687443 | 0             | 1.594136137  |
| PVX_110935 | 1           | 0             | 0            |
| PVX_110940 | 0.000125309 | 0             | 3.946323853  |
| PVX_110945 | 1           | 0             | 0            |
| PVX_110950 | 1           | 0             | 0            |
| PVX_110955 | 1           | 0             | 0            |
| PVX_110960 | 0.078805602 | 0             | 0.767959148  |
| PVX_110965 | 1           | 0             | 0            |
| PVX_110970 | 1           | 0             | 0            |
| PVX_110975 | 0.007054102 | 0             | 1.495544029  |
| PVX_110980 | 0.000125309 | 0             | 3.929361387  |
| PVX_110985 | 0.078805602 | 0             | 1.079912859  |
| PVX_110990 | 1           | 0             | 0            |
| PVX_110995 | 0.036687443 | 0             | 1.420256716  |
| PVX_111000 | 0.007054102 | 0             | 1.65970353   |
| PVX_111005 | 0.007054102 | 0             | 1.771920205  |
| PVX_111010 | 0.359317338 | 0             | 0.259171705  |
| PVX_111015 | 0.359317338 | 0             | 0.480964849  |
| PVX_111020 | 0.359317338 | 0             | 0.362310633  |
| PVX_111025 | 0.016473156 | 0             | 1.688169741  |
| PVX_111030 | 0.016473156 | 0             | 2.400337186  |
| PVX_111035 | 1           | 0             | 0            |
| PVX_111040 | 0.002855585 | 0             | 2.740738894  |
| PVX_111045 | 0.000125309 | 0             | 3.353834762  |
| PVX_111050 | 0.001084333 | 0             | 2.905641165  |
| PVX_111055 | 0.000125309 | 0             | 4.686753461  |
| PVX_111060 | 0.166224591 | 0             | 0.742071675  |
| PVX_111065 | 0.359317338 | 0             | 0.222237182  |
| PVX_111070 | 3.76E-05    | 0             | 4.589233161  |
| PVX_111075 | 0.016473156 | 0             | 1.518955634  |
| PVX_111080 | 0.002855585 | 0             | 2.200504652  |
| PVX_111085 | 0.007054102 | 0             | 2.110021768  |
| PVX_111090 | 0.016473156 | 0             | 1.570275989  |
| PVX_111095 | 0.007054102 | 0             | 2.248142649  |
| PVX_111100 | 0.359317338 | 0             | 0.390414918  |
| PVX_111105 | 0.359317338 | 0             | 0.23216602   |

| GeneID     | Pvalue      | BackGroundPre | BackGroundDx |
|------------|-------------|---------------|--------------|
| PVX_111110 | 0.002855585 | 0             | 2.246204908  |
| PVX_111115 | 0.166224591 | 0             | 0.596325323  |
| PVX_111120 | 0.007054102 | 0             | 1.484090609  |
| PVX_111125 | 0.016473156 | 0             | 1.25569769   |
| PVX_111130 | 1           | 0             | 0            |
| PVX_111135 | 0.166224591 | 0             | 0.572740932  |
| PVX_111140 | 1           | 0             | 0            |
| PVX_111145 | 0.359317338 | 0             | 0.315354818  |
| PVX_111150 | 0.036687443 | 0             | 1.150435691  |
| PVX_111155 | 0.036687443 | 0             | 1.030202752  |
| PVX_111160 | 1           | 0             | 0            |
| PVX_111165 | 1           | 0             | 0            |
| PVX_111170 | 1           | 0             | 0            |
| PVX_111175 | 0.166224591 | 0             | 0.686305934  |
| PVX_111180 | 1           | 0             | 0            |
| PVX_111185 | 0.016473156 | 0             | 1.814344875  |
| PVX_111190 | 0.016473156 | 0             | 2.136034148  |
| PVX_111195 | 0.000383392 | 0             | 3.182755152  |
| PVX_111200 | 0.002855585 | 0             | 2.998515611  |
| PVX_111205 | 1           | 0             | 0            |
| PVX_111210 | 0.166224591 | 0             | 0.442739942  |
| PVX_111215 | 0.166224591 | 0             | 0.510308953  |
| PVX_111220 | 0.001084333 | 0             | 2.051499969  |
| PVX_111225 | 0.078805602 | 0             | 1.090710406  |
| PVX_111230 | 0.166224591 | 0             | 0.44697583   |
| PVX_111235 | 0.002855585 | 0             | 2.403864039  |
| PVX_111240 | 1           | 0             | 0            |
| PVX_111245 | 0.000383392 | 0             | 4.830352036  |
| PVX_111250 | 0.078805602 | 0             | 1.05264552   |
| PVX_111255 | 0.000125309 | 0             | 3.540185393  |
| PVX_111260 | 0.166224591 | 0             | 0.501422158  |
| PVX_111265 | 0.036687443 | 0             | 1.386363798  |
| PVX_111270 | 0.016473156 | 0             | 1.247097579  |
| PVX_111275 | 0.359317338 | 0             | 0.210316565  |
| PVX_111280 | 1           | 0             | 0            |
| PVX_111285 | 0.166224591 | 0             | 0.801083775  |
| PVX_111290 | 0.359317338 | 0             | 0.247714259  |
| PVX_111292 | 1           | 0             | 0            |
| PVX_111295 | 0.007054102 | 0             | 1.959413078  |
| PVX_111300 | 0.001084333 | 0             | 3.094834499  |
| PVX_111305 | 0.078805602 | 0             | 1.134377986  |

| GeneID     | Pvalue      | BackGroundPre | BackGroundDx |
|------------|-------------|---------------|--------------|
| PVX_111310 | 1           | 0             | 0            |
| PVX_111315 | 0.007054102 | 0             | 2.155585287  |
| PVX_111320 | 0.002855585 | 0             | 2.154441802  |
| PVX_111325 | 1           | 0             | 0            |
| PVX_111330 | 1.03E-05    | 0             | 6.421665556  |
| PVX_111335 | 0.359317338 | 0             | 0.389265218  |
| PVX_111340 | 0.036687443 | 0             | 1.400365431  |
| PVX_111345 | 0.078805602 | 0             | 1.537838556  |
| PVX_111350 | 0.016473156 | 0             | 1.921160314  |
| PVX_111355 | 0.001084333 | 0             | 2.919754221  |
| PVX_111360 | 1           | 0             | 0            |
| PVX_111365 | 0.002855585 | 0             | 2.271388175  |
| PVX_111370 | 0.359317338 | 0             | 0.160265199  |
| PVX_111375 | 1           | 0             | 0            |
| PVX_111380 | 3.76E-05    | 0             | 6.191215073  |
| PVX_111385 | 1           | 0             | 0            |
| PVX_111387 | 1           | 0             | 0            |
| PVX_111390 | 1           | 0             | 0            |
| PVX_111395 | 0.166224591 | 0             | 0.396894244  |
| PVX_111400 | 0.078805602 | 0             | 0.857255057  |
| PVX_111405 | 1           | 0             | 0            |
| PVX_111410 | 0.007054102 | 0             | 2.189235864  |
| PVX_111415 | 0.359317338 | 0             | 0.144879632  |
| PVX_111420 | 1           | 0             | 0            |
| PVX_111425 | 0.016473156 | 0             | 2.065445033  |
| PVX_111430 | 0.359317338 | 0             | 0.535078937  |
| PVX_111435 | 0.001084333 | 0             | 1.364576073  |
| PVX_111440 | 0.166224591 | 0             | 0.5117699    |
| PVX_111445 | 0.002855585 | 0             | 2.450402372  |
| PVX_111450 | 0.166224591 | 0             | 0.667085408  |
| PVX_111455 | 0.001084333 | 0             | 2.628035166  |
| PVX_111460 | 0.359317338 | 0             | 0.223591227  |
| PVX_111465 | 0.007054102 | 0             | 1.686854218  |
| PVX_111470 | 1.03E-05    | 0             | 5.039532079  |
| PVX_111475 | 0.036687443 | 0             | 1.284015053  |
| PVX_111480 | 0.016473156 | 0             | 1.651265187  |
| PVX_111485 | 0.007054102 | 0             | 2.679008513  |
| PVX_111490 | 0.016473156 | 0             | 1.714960706  |
| PVX_111495 | 0.002855585 | 0             | 2.98297278   |
| PVX_111500 | 0.359317338 | 0             | 0.433842863  |
| PVX_111510 | 0.359317338 | 0             | 0.181544433  |

| GeneID     | Pvalue      | BackGroundPre | BackGroundDx |
|------------|-------------|---------------|--------------|
| PVX_111515 | 0.007054102 | 0             | 1.938955073  |
| PVX_111520 | 1.03E-05    | 0             | 3.946651643  |
| PVX_111525 | 1           | 0             | 0            |
| PVX_111530 | 1           | 0             | 0            |
| PVX_111535 | 1           | 0             | 0            |
| PVX_111540 | 0.001084333 | 0             | 4.547456804  |
| PVX_111545 | 0.016473156 | 0             | 2.070916955  |
| PVX_111550 | 0.078805602 | 0             | 1.65069333   |
| PVX_111555 | 0.002855585 | 0             | 2.536601768  |
| PVX_111560 | 0.007054102 | 0             | 0.941261109  |
| PVX_111565 | 0.166224591 | 0             | 0.722192026  |
| PVX_111570 | 0.016473156 | 0             | 1.82547888   |
| PVX_111575 | 0.002855585 | 0             | 2.313889589  |
| PVX_111580 | 0.359317338 | 0             | 0.282195357  |
| PVX_111590 | 0.002855585 | 0             | 2.139157424  |
| PVX_111595 | 0.016473156 | 0             | 1.036674445  |
| PVX_111600 | 0.002855585 | 0             | 2.573717814  |
| PVX_112100 | 1           | 0             | 0            |
| PVX_112105 | 0.007054102 | 0             | 2.142430291  |
| PVX_112110 | 0.000383392 | 0             | 3.644598131  |
| PVX_112115 | 1           | 0             | 0            |
| PVX_112120 | 1           | 0             | 0            |
| PVX_112125 | 1           | 0             | 0            |
| PVX_112625 | 0.359317338 | 0             | 0.364102298  |
| PVX_112630 | 0.078805602 | 0             | 1.092573856  |
| PVX_112635 | 0.359317338 | 0             | 0.360534238  |
| PVX_112640 | 1           | 0             | 0            |
| PVX_112645 | 1           | 0             | 0            |
| PVX_112650 | 0.078805602 | 0             | 1.334853062  |
| PVX_112655 | 0.016473156 | 0             | 1.615075354  |
| PVX_112660 | 0.036687443 | 0             | 1.412862881  |
| PVX_112665 | 0.007054102 | 0             | 2.533652402  |
| PVX_112670 | 0.000232007 | 0.35781602    | 4.68884563   |
| PVX_112675 | 0.007054102 | 0             | 1.866888734  |
| PVX_112680 | 3.76E-05    | 0             | 4.670046774  |
| PVX_112685 | 0.007054102 | 0             | 2.077400284  |
| PVX_112690 | 1.03E-05    | 0             | 5.672277268  |
| PVX_112695 | 0.359317338 | 0             | 0.351300007  |
| PVX_112700 | 0.036687443 | 0             | 1.344352214  |
| PVX_112705 | 0.036687443 | 0             | 1.413919363  |
| PVX_112710 | 0.166224591 | 0             | 0.615309956  |



| GeneID     | Pvalue      | BackGroundPre | BackGroundDx |
|------------|-------------|---------------|--------------|
| PVX_112715 | 1           | 0             | 0            |
| PVX_112720 | 1           | 0             | 0            |
| PVX_113220 | 0.359317338 | 0             | 0.297572486  |
| PVX_113225 | 0.078805602 | 0             | 1.259800713  |
| PVX_113230 | 0.078805602 | 0             | 0.998598264  |
| PVX_113235 | 3.76E-05    | 0             | 5.361361217  |
| PVX_113240 | 0.007054102 | 0             | 2.261662833  |
| PVX_113245 | 0.000125309 | 0             | 4.81277779   |
| PVX_113250 | 0.016473156 | 0             | 2.042296954  |
| PVX_113255 | 0.078805602 | 0             | 1.248841104  |
| PVX_113260 | 0.166224591 | 0             | 0.452659637  |
| PVX_113265 | 0.036687443 | 0             | 0.940671184  |
| PVX_113270 | 0.007054102 | 0             | 1.558658874  |
| PVX_113275 | 0.036687443 | 0             | 1.575916866  |
| PVX_113280 | 1           | 0             | 0            |
| PVX_113285 | 0.036687443 | 0             | 1.17810604   |
| PVX_113290 | 0.078805602 | 0             | 1.075425391  |
| PVX_113295 | 0.016473156 | 0             | 1.333605107  |
| PVX_113300 | 0.078805602 | 0             | 0.984944822  |
| PVX_113305 | 0.078805602 | 0             | 0.929920409  |
| PVX_113310 | 0.001084333 | 0             | 2.78366713   |
| PVX_113315 | 0.166224591 | 0             | 0.6183428    |
| PVX_113320 | 0.001084333 | 0             | 3.116104631  |
| PVX_113325 | 0.016473156 | 0             | 1.526373234  |
| PVX_113330 | 0.002855585 | 0             | 2.595232579  |
| PVX_113335 | 0.001084333 | 0             | 2.863858196  |
| PVX_113340 | 0.002855585 | 0             | 2.53372668   |
| PVX_113345 | 0.001084333 | 0             | 1.850565124  |
| PVX_113350 | 0.036687443 | 0             | 1.265326132  |
| PVX_113355 | 0.036687443 | 0             | 0.86271362   |
| PVX_113360 | 1           | 0             | 0            |
| PVX_113365 | 0.007054102 | 0             | 1.499443696  |
| PVX_113370 | 0.359317338 | 0             | 0.166142105  |
| PVX_113375 | 0.166224591 | 0             | 0.683124261  |
| PVX_113380 | 0.001084333 | 0             | 2.908747649  |
| PVX_113385 | 0.078805602 | 0             | 0.968744165  |
| PVX_113390 | 3.76E-05    | 0             | 3.229642199  |
| PVX_113395 | 0.166224591 | 0             | 0.497190986  |
| PVX_113400 | 0.166224591 | 0             | 0.70648518   |
| PVX_113405 | 0.016473156 | 0             | 1.326554581  |
| PVX_113410 | 0.359317338 | 0             | 0.401208229  |

| GeneID     | Pvalue      | BackGroundPre | BackGroundDx |
|------------|-------------|---------------|--------------|
| PVX_113415 | 0.078805602 | 0             | 1.174633996  |
| PVX_113420 | 0.000383392 | 0             | 3.346916317  |
| PVX_113430 | 0.359317338 | 0             | 0.4258407    |
| PVX_113435 | 0.166224591 | 0             | 0.585347149  |
| PVX_113440 | 0.078805602 | 0             | 1.427161218  |
| PVX_113445 | 0.036687443 | 0             | 1.355677918  |
| PVX_113450 | 0.166224591 | 0             | 0.337002592  |
| PVX_113455 | 1           | 0             | 0            |
| PVX_113460 | 0.036687443 | 0             | 0.961089213  |
| PVX_113465 | 0.001084333 | 0             | 3.434414527  |
| PVX_113470 | 0.016473156 | 0             | 1.412526399  |
| PVX_113475 | 0.002855585 | 0             | 2.467601756  |
| PVX_113480 | 0.359317338 | 0             | 0.515924653  |
| PVX_113485 | 0.359317338 | 0             | 0.498946552  |
| PVX_113490 | 0.359317338 | 0             | 0.386106778  |
| PVX_113495 | 0.000125309 | 0             | 3.994536714  |
| PVX_113500 | 0.007054102 | 0             | 1.59761446   |
| PVX_113505 | 0.001084333 | 0             | 2.714511886  |
| PVX_113510 | 0.036687443 | 0             | 1.698119386  |
| PVX_113515 | 3.76E-05    | 0             | 3.950011001  |
| PVX_113520 | 1           | 0             | 0            |
| PVX_113525 | 0.078805602 | 0             | 0.953850649  |
| PVX_113530 | 0.078805602 | 0             | 1.039695019  |
| PVX_113535 | 0.000383392 | 0             | 3.240904855  |
| PVX_113540 | 0.007054102 | 0             | 2.034483341  |
| PVX_113545 | 1           | 0             | 0            |
| PVX_113550 | 1           | 0             | 0            |
| PVX_113555 | 0.007054102 | 0             | 2.051616535  |
| PVX_113560 | 0.002855585 | 0             | 2.262407497  |
| PVX_113565 | 0.166224591 | 0             | 0.677208312  |
| PVX_113567 | 0.016473156 | 0             | 1.479690652  |
| PVX_113570 | 0.007054102 | 0             | 2.579538695  |
| PVX_113574 | 0.078805602 | 0             | 0.636532692  |
| PVX_113576 | 0.007054102 | 0             | 2.088230218  |
| PVX_113580 | 0.078805602 | 0             | 1.416165318  |
| PVX_113585 | 0.000383392 | 0             | 4.537480997  |
| PVX_113590 | 1           | 0             | 0            |
| PVX_113595 | 3.76E-05    | 0             | 5.086034423  |
| PVX_113600 | 0.007054102 | 0             | 1.984145266  |
| PVX_113605 | 0.007054102 | 0             | 1.992599383  |
| PVX_113610 | 0.000125309 | 0             | 2.280511624  |

| GeneID      | Pvalue      | BackGroundPre | BackGroundDx |
|-------------|-------------|---------------|--------------|
| PVX_113615  | 0.078805602 | 0             | 1.041575784  |
| PVX_113617  | 0.007054102 | 0             | 1.938876946  |
| PVX_113620  | 0.036687443 | 0             | 1.139409327  |
| PVX_113625  | 0.359317338 | 0             | 0.242127834  |
| PVX_113630  | 1           | 0             | 0            |
| PVX_113635  | 0.007054102 | 0             | 1.389110224  |
| PVX_113640  | 0.359317338 | 0             | 0.271183375  |
| PVX_113645  | 0.007054102 | 0             | 1.478365212  |
| PVX_113650  | 0.016473156 | 0             | 1.893319444  |
| PVX_113655  | 0.001084333 | 0             | 3.170369923  |
| PVX_113660  | 0.001084333 | 0             | 3.033253192  |
| PVX_113665  | 0.001084333 | 0             | 3.764611332  |
| PVX_113670  | 0.016473156 | 0             | 1.852267548  |
| PVX_113675  | 0.000125309 | 0             | 3.889621317  |
| PVX_113680  | 0.002855585 | 0             | 2.248173084  |
| PVX_113685  | 0.166224591 | 0             | 0.592841589  |
| PVX_113690  | 1           | 0             | 0            |
| PVX_113695  | 0.007054102 | 0             | 2.030891218  |
| PVX_113705  | 0.036687443 | 0             | 1.568681214  |
| PVX_113710  | 0.166224591 | 0             | 0.479594678  |
| PVX_113720  | 1           | 0             | 0            |
| PVX_113725  | 0.359317338 | 0             | 0.335389407  |
| PVX_113725a | 0.002855585 | 0             | 5.146977119  |
| PVX_113731  | 0.000383392 | 0             | 2.059256474  |
| PVX_113735  | 0.359317338 | 0             | 0.37472429   |
| PVX_113740  | 0.000383392 | 0             | 3.685593958  |
| PVX_113745  | 0.359317338 | 0             | 0.408219211  |
| PVX_113750  | 3.76E-05    | 0             | 4.60196289   |
| PVX_113755  | 0.359317338 | 0             | 0.164543203  |
| PVX_113757  | 0.359317338 | 0             | 0.441690037  |
| PVX_113760  | 0.036687443 | 0             | 1.654975886  |
| PVX_113765  | 1           | 0             | 0            |
| PVX_113770  | 0.166224591 | 0             | 0.733686366  |
| PVX_113775  | 0.359317338 | 0             | 0.385443808  |
| PVX_113780  | 0.036687443 | 0             | 1.3491401    |
| PVX_113785  | 0.000125309 | 0             | 4.017820281  |
| PVX_113790  | 3.76E-05    | 0             | 4.59083342   |
| PVX_113795  | 0.359317338 | 0             | 0.425955798  |
| PVX_113797  | 1           | 0             | 0            |
| PVX_113800  | 0.078805602 | 0             | 0.569252099  |
| PVX_113805  | 0.359317338 | 0             | 0.317245204  |

| GeneID     | Pvalue      | BackGroundPre | BackGroundDx |
|------------|-------------|---------------|--------------|
| PVX_113810 | 0.007054102 | 0             | 1.918744202  |
| PVX_113815 | 1           | 0             | 0            |
| PVX_113820 | 0.001084333 | 0             | 2.892275546  |
| PVX_113825 | 3.76E-05    | 0             | 2.707112077  |
| PVX_113830 | 0.036687443 | 0             | 0.698145925  |
| PVX_113835 | 0.078805602 | 0             | 0.892382237  |
| PVX_113844 | 0.359317338 | 0             | 0.223114253  |
| PVX_113846 | 0.007054102 | 0             | 1.672033272  |
| PVX_113850 | 0.002855585 | 0             | 2.171315171  |
| PVX_113855 | 0.166224591 | 0             | 0.834466139  |
| PVX_113860 | 3.76E-05    | 0             | 6.197077321  |
| PVX_113865 | 0.078805602 | 0             | 0.804949137  |
| PVX_113870 | 1           | 0             | 0            |
| PVX_113875 | 0.036687443 | 0             | 1.515289277  |
| PVX_113880 | 0.007054102 | 0             | 1.633950545  |
| PVX_113885 | 0.359317338 | 0             | 0.391593742  |
| PVX_113890 | 1           | 0             | 0            |
| PVX_113895 | 0.359317338 | 0             | 0.247714259  |
| PVX_113900 | 0.002855585 | 0             | 2.396542224  |
| PVX_113905 | 0.001084333 | 0             | 1.923923499  |
| PVX_113910 | 1           | 0             | 0            |
| PVX_113915 | 0.000125309 | 0             | 2.710408759  |
| PVX_113920 | 0.016473156 | 0             | 2.233081234  |
| PVX_113925 | 0.002855585 | 0             | 1.956624831  |
| PVX_113930 | 0.016473156 | 0             | 1.039281365  |
| PVX_113935 | 0.359317338 | 0             | 0.305374759  |
| PVX_113940 | 0.166224591 | 0             | 0.762275047  |
| PVX_113945 | 0.002855585 | 0             | 2.155209228  |
| PVX_113950 | 0.016473156 | 0             | 2.005175374  |
| PVX_113955 | 0.016473156 | 0             | 1.34101494   |
| PVX_113960 | 1           | 0             | 0            |
| PVX_113965 | 1           | 0             | 0            |
| PVX_113970 | 0.016473156 | 0             | 1.618327324  |
| PVX_113975 | 0.359317338 | 0             | 0.23317484   |
| PVX_113980 | 0.016473156 | 0             | 1.762095636  |
| PVX_113985 | 0.359317338 | 0             | 0.19527403   |
| PVX_113990 | 0.001084333 | 0             | 3.166398913  |
| PVX_113995 | 0.036687443 | 0             | 1.086990125  |
| PVX_114000 | 0.002855585 | 0             | 2.936013178  |
| PVX_114005 | 0.359317338 | 0             | 0.494895546  |
| PVX_114010 | 0.078805602 | 0             | 1.386148745  |

| GeneID     | Pvalue      | BackGroundPre | BackGroundDx |
|------------|-------------|---------------|--------------|
| PVX_114015 | 0.036687443 | 0             | 2.053993337  |
| PVX_114020 | 0.166224591 | 0             | 0.687427389  |
| PVX_114025 | 0.036687443 | 0             | 1.274137243  |
| PVX_114030 | 0.036687443 | 0             | 1.112598886  |
| PVX_114035 | 3.76E-05    | 0             | 5.367462965  |
| PVX_114040 | 1.03E-05    | 0             | 6.911397382  |
| PVX_114045 | 0.078805602 | 0             | 0.864167217  |
| PVX_114050 | 0.001084333 | 0             | 3.324838559  |
| PVX_114055 | 0.000125309 | 0             | 4.150888416  |
| PVX_114060 | 0.007054102 | 0             | 2.694061167  |
| PVX_114065 | 0.007054102 | 0             | 1.724395723  |
| PVX_114070 | 0.078805602 | 0             | 1.025147854  |
| PVX_114075 | 0.001084333 | 0             | 2.285372149  |
| PVX_114080 | 0.359317338 | 0             | 0.400360356  |
| PVX_114085 | 0.016473156 | 0             | 1.452927183  |
| PVX_114090 | 0.036687443 | 0             | 0.623620372  |
| PVX_114095 | 3.76E-05    | 0             | 4.957207443  |
| PVX_114100 | 0.000125309 | 0             | 3.364465155  |
| PVX_114105 | 0.036687443 | 0             | 1.172236235  |
| PVX_114110 | 0.078805602 | 0             | 0.709755291  |
| PVX_114115 | 0.036687443 | 0             | 0.901098299  |
| PVX_114120 | 0.166224591 | 0             | 0.77837626   |
| PVX_114125 | 0.016473156 | 0             | 1.849634134  |
| PVX_114130 | 0.036687443 | 0             | 1.543360847  |
| PVX_114135 | 1           | 0             | 0            |
| PVX_114140 | 0.166224591 | 0             | 0.557799066  |
| PVX_114145 | 1           | 0             | 0            |
| PVX_114150 | 0.016473156 | 0             | 1.603114891  |
| PVX_114155 | 0.166224591 | 0             | 0.717574613  |
| PVX_114160 | 0.007054102 | 0             | 2.152323469  |
| PVX_114163 | 1           | 0             | 0            |
| PVX_114165 | 1           | 0             | 0            |
| PVX_114167 | 1           | 0             | 0            |
| PVX_114170 | 0.016473156 | 0             | 1.598009268  |
| PVX_114175 | 0.036687443 | 0             | 0.978778058  |
| PVX_114180 | 0.002855585 | 0             | 3.216270932  |
| PVX_114185 | 0.001084333 | 0             | 2.950430412  |
| PVX_114190 | 1           | 0             | 0            |
| PVX_114195 | 0.016473156 | 0             | 1.816342261  |
| PVX_114197 | 1           | 0             | 0            |
| PVX_114200 | 0.016473156 | 0             | 1.361348332  |

| GeneID     | Pvalue      | BackGroundPre | BackGroundDx |
|------------|-------------|---------------|--------------|
| PVX_114205 | 0.000125309 | 0             | 4.600756918  |
| PVX_114210 | 3.76E-05    | 0             | 4.294060502  |
| PVX_114215 | 1           | 0             | 0            |
| PVX_114220 | 0.359317338 | 0             | 0.180557958  |
| PVX_114225 | 0.016473156 | 0             | 1.547966319  |
| PVX_114230 | 0.016473156 | 0             | 1.4925086    |
| PVX_114235 | 0.016473156 | 0             | 2.243674665  |
| PVX_114240 | 0.166224591 | 0             | 0.664605455  |
| PVX_114245 | 0.166224591 | 0             | 0.631597327  |
| PVX_114250 | 0.036687443 | 0             | 1.319387327  |
| PVX_114255 | 0.002855585 | 0             | 2.263382155  |
| PVX_114260 | 0.036687443 | 0             | 0.655866595  |
| PVX_114265 | 0.166224591 | 0             | 0.56398474   |
| PVX_114270 | 0.000383392 | 0             | 3.137221231  |
| PVX_114275 | 0.036687443 | 0             | 1.304662955  |
| PVX_114280 | 0.007054102 | 0             | 1.958107093  |
| PVX_114285 | 1           | 0             | 0            |
| PVX_114290 | 0.007054102 | 0             | 2.448075244  |
| PVX_114295 | 0.000383392 | 0             | 3.178438811  |
| PVX_114300 | 0.016473156 | 0             | 1.438292258  |
| PVX_114305 | 0.007054102 | 0             | 1.607524056  |
| PVX_114310 | 0.078805602 | 0             | 1.110232732  |
| PVX_114315 | 0.001084333 | 0             | 3.432701245  |
| PVX_114320 | 0.359317338 | 0             | 0.341218016  |
| PVX_114325 | 0.007054102 | 0             | 2.185907955  |
| PVX_114330 | 0.359317338 | 0             | 0.330945349  |
| PVX_114335 | 0.016473156 | 0             | 1.563834137  |
| PVX_114337 | 0.359317338 | 0             | 0.503033505  |
| PVX_114340 | 0.016473156 | 0             | 1.062383013  |
| PVX_114344 | 1           | 0             | 0            |
| PVX_114346 | 0.359317338 | 0             | 0.18017005   |
| PVX_114350 | 0.359317338 | 0             | 0.235234861  |
| PVX_114355 | 0.016473156 | 0             | 1.647276364  |
| PVX_114360 | 1           | 0             | 0            |
| PVX_114365 | 0.359317338 | 0             | 0.288524635  |
| PVX_114370 | 0.016473156 | 0             | 1.419220414  |
| PVX_114375 | 0.359317338 | 0             | 0.34225994   |
| PVX_114380 | 0.078805602 | 0             | 0.932030498  |
| PVX_114385 | 0.166224591 | 0             | 0.713120171  |
| PVX_114390 | 0.078805602 | 0             | 1.358441349  |
| PVX_114395 | 0.036687443 | 0             | 1.089497717  |

| GeneID     | Pvalue      | BackGroundPre | BackGroundDx |
|------------|-------------|---------------|--------------|
| PVX_114400 | 1           | 0             | 0            |
| PVX_114405 | 0.000125309 | 0             | 3.251158608  |
| PVX_114410 | 0.036687443 | 0             | 1.094951471  |
| PVX_114415 | 0.002855585 | 0             | 2.699042638  |
| PVX_114420 | 0.166224591 | 0             | 0.557708608  |
| PVX_114425 | 1           | 0             | 0            |
| PVX_114430 | 0.166224591 | 0             | 0.396894244  |
| PVX_114435 | 0.007054102 | 0             | 2.633464829  |
| PVX_114440 | 0.016473156 | 0             | 1.8122778    |
| PVX_114445 | 3.76E-05    | 0             | 5.853808965  |
| PVX_114450 | 0.016473156 | 0             | 1.686916958  |
| PVX_114455 | 1           | 0             | 0            |
| PVX_114460 | 0.036687443 | 0             | 0.903655982  |
| PVX_114465 | 0.359317338 | 0             | 0.424575753  |
| PVX_114470 | 0.001084333 | 0             | 2.511166198  |
| PVX_114475 | 0.359317338 | 0             | 0.329415696  |
| PVX_114480 | 3.76E-05    | 0             | 5.722999676  |
| PVX_114485 | 0.166224591 | 0             | 0.744865731  |
| PVX_114490 | 0.000125309 | 0             | 3.160497908  |
| PVX_114495 | 0.166224591 | 0             | 0.455211221  |
| PVX_114500 | 0.002855585 | 0             | 2.246111381  |
| PVX_114505 | 0.359317338 | 0             | 0.470872174  |
| PVX_114510 | 0.166224591 | 0             | 0.139094446  |
| PVX_114512 | 0.007054102 | 0             | 1.270188892  |
| PVX_114515 | 0.000383392 | 0             | 4.103802341  |
| PVX_114520 | 1           | 0             | 0            |
| PVX_114525 | 0.166224591 | 0             | 0.682001299  |
| PVX_114530 | 0.359317338 | 0             | 0.295374591  |
| PVX_114535 | 0.002855585 | 0             | 2.459619151  |
| PVX_114540 | 0.036687443 | 0             | 1.37433731   |
| PVX_114545 | 0.016473156 | 0             | 1.207971624  |
| PVX_114550 | 0.166224591 | 0             | 0.66659251   |
| PVX_114555 | 0.000383392 | 0             | 3.088232503  |
| PVX_114560 | 0.007054102 | 0             | 2.282284233  |
| PVX_114565 | 0.002855585 | 0             | 2.595481627  |
| PVX_114570 | 0.007054102 | 0             | 1.999014003  |
| PVX_114575 | 0.001084333 | 0             | 2.707181805  |
| PVX_114580 | 0.002855585 | 0             | 2.317805722  |
| PVX_114585 | 0.000383392 | 0             | 1.727414702  |
| PVX_114590 | 0.002855585 | 0             | 2.154952477  |
| PVX_114595 | 0.166224591 | 0             | 0.721135395  |

| GeneID     | Pvalue      | BackGroundPre | BackGroundDx |
|------------|-------------|---------------|--------------|
| PVX_114600 | 0.359317338 | 0             | 0.270264518  |
| PVX_114605 | 1           | 0             | 0            |
| PVX_114610 | 0.359317338 | 0             | 0.416461379  |
| PVX_114615 | 0.078805602 | 0             | 0.517205755  |
| PVX_114620 | 0.359317338 | 0             | 0.346944119  |
| PVX_114625 | 0.016473156 | 0             | 1.482651091  |
| PVX_114630 | 0.007054102 | 0             | 1.892085664  |
| PVX_114635 | 0.036687443 | 0             | 1.316727816  |
| PVX_114640 | 1           | 0             | 0            |
| PVX_114645 | 0.016473156 | 0             | 1.624822534  |
| PVX_114650 | 0.078805602 | 0             | 0.9779272    |
| PVX_114655 | 0.016473156 | 0             | 0.988669015  |
| PVX_114660 | 0.007054102 | 0             | 2.009705454  |
| PVX_114665 | 0.001084333 | 0             | 2.974332333  |
| PVX_114670 | 0.002855585 | 0             | 2.691085297  |
| PVX_114675 | 0.002855585 | 0             | 2.831836967  |
| PVX_114680 | 3.76E-05    | 0             | 4.754604512  |
| PVX_114685 | 3.76E-05    | 0             | 4.926383351  |
| PVX_114690 | 0.166224591 | 0             | 0.615153325  |
| PVX_114695 | 0.078805602 | 0             | 0.755387154  |
| PVX_114700 | 0.001084333 | 0             | 2.7577975    |
| PVX_114705 | 0.016473156 | 0             | 1.795139061  |
| PVX_114710 | 0.000383392 | 0             | 3.719006254  |
| PVX_114715 | 0.000383392 | 0             | 3.584426585  |
| PVX_114720 | 1           | 0             | 0            |
| PVX_114725 | 1           | 0             | 0            |
| PVX_114730 | 0.166224591 | 0             | 0.573622059  |
| PVX_114735 | 0.001084333 | 0             | 2.211172865  |
| PVX_114740 | 0.166224591 | 0             | 0.465458282  |
| PVX_114745 | 0.016473156 | 0             | 1.461478794  |
| PVX_114747 | 1           | 0             | 0            |
| PVX_114750 | 0.001084333 | 0             | 2.987137638  |
| PVX_114755 | 0.359317338 | 0             | 0.285804065  |
| PVX_114760 | 0.036687443 | 0             | 1.000650497  |
| PVX_114765 | 1           | 0             | 0            |
| PVX_114770 | 0.078805602 | 0             | 1.297921963  |
| PVX_114775 | 0.036687443 | 0             | 1.44121098   |
| PVX_114780 | 0.359317338 | 0             | 0.344230675  |
| PVX_114785 | 0.359317338 | 0             | 0.266445135  |
| PVX_114790 | 0.016473156 | 0             | 1.806974127  |
| PVX_114795 | 1           | 0             | 0            |



| GeneID     | Pvalue      | BackGroundPre | BackGroundDx |
|------------|-------------|---------------|--------------|
| PVX_114800 | 0.166224591 | 0             | 0.375180841  |
| PVX_114805 | 1           | 0             | 0            |
| PVX_114810 | 0.359317338 | 0             | 0.26471655   |
| PVX_114815 | 0.359317338 | 0             | 0.364126667  |
| PVX_114820 | 0.359317338 | 0             | 0.076573946  |
| PVX_114825 | 0.036687443 | 0             | 1.607872206  |
| PVX_114830 | 1.03E-05    | 0             | 6.700151157  |
| PVX_114832 | 1.03E-05    | 0             | 6.672358949  |
| PVX_114835 | 0.036687443 | 0             | 1.062612428  |
| PVX_114840 | 1           | 0             | 0            |
| PVX_114845 | 3.76E-05    | 0             | 3.739291164  |
| PVX_114850 | 0.016473156 | 0             | 1.106914705  |
| PVX_114855 | 0.166224591 | 0             | 0.777146641  |
| PVX_114860 | 0.000383392 | 0             | 2.61626413   |
| PVX_114865 | 0.000383392 | 0             | 3.687109084  |
| PVX_114870 | 0.007054102 | 0             | 2.365076642  |
| PVX_114875 | 0.016473156 | 0             | 1.189162439  |
| PVX_114880 | 0.002855585 | 0             | 2.256474035  |
| PVX_114885 | 0.016473156 | 0             | 1.282025368  |
| PVX_114890 | 0.016473156 | 0             | 1.420100469  |
| PVX_114892 | 1           | 0             | 0            |
| PVX_114895 | 0.002855585 | 0             | 2.142660156  |
| PVX_114900 | 0.078805602 | 0             | 0.831607082  |
| PVX_114905 | 0.359317338 | 0             | 0.353885291  |
| PVX_114910 | 3.76E-05    | 0             | 6.125748519  |
| PVX_114920 | 0.001084333 | 0             | 3.120274796  |
| PVX_114922 | 0.000125309 | 0             | 2.49835925   |
| PVX_114925 | 0.078805602 | 0             | 0.866774073  |
| PVX_114930 | 0.078805602 | 0             | 1.054399085  |
| PVX_114935 | 0.007054102 | 0             | 1.907143131  |
| PVX_114940 | 0.001084333 | 0             | 3.092032486  |
| PVX_114945 | 0.359317338 | 0             | 0.37164006   |
| PVX_114950 | 0.002855585 | 0             | 1.758668632  |
| PVX_114955 | 0.166224591 | 0             | 0.282275076  |
| PVX_114960 | 0.359317338 | 0             | 0.449446232  |
| PVX_114965 | 0.016473156 | 0             | 1.329462903  |
| PVX_114970 | 0.078805602 | 0             | 1.183487624  |
| PVX_114975 | 0.016473156 | 0             | 1.905941054  |
| PVX_114977 | 0.036687443 | 0             | 1.583710925  |
| PVX_114980 | 0.036687443 | 0             | 1.396705307  |
| PVX_114985 | 0.016473156 | 0             | 1.698259473  |

| GeneID     | Pvalue      | BackGroundPre | BackGroundDx |
|------------|-------------|---------------|--------------|
| PVX_114990 | 1           | 0             | 0            |
| PVX_114995 | 0.078805602 | 0             | 0.786383024  |
| PVX_115000 | 3.76E-05    | 0             | 4.468399556  |
| PVX_115005 | 0.002855585 | 0             | 2.791156613  |
| PVX_115010 | 0.016473156 | 0             | 1.511944827  |
| PVX_115015 | 0.000383392 | 0             | 3.117552105  |
| PVX_115020 | 0.002855585 | 0             | 1.856454676  |
| PVX_115025 | 1           | 0             | 0            |
| PVX_115030 | 1           | 0             | 0            |
| PVX_115035 | 1           | 0             | 0            |
| PVX_115040 | 0.166224591 | 0             | 0.931633771  |
| PVX_115045 | 0.002855585 | 0             | 3.280061159  |
| PVX_115050 | 0.166224591 | 0             | 0.285996581  |
| PVX_115055 | 0.001084333 | 0             | 3.303113541  |
| PVX_115060 | 0.166224591 | 0             | 0.83181995   |
| PVX_115063 | 1           | 0             | 0            |
| PVX_115065 | 0.007054102 | 0             | 2.0848828    |
| PVX_115070 | 0.166224591 | 0             | 0.665366024  |
| PVX_115075 | 0.000383392 | 0             | 2.685996041  |
| PVX_115080 | 0.166224591 | 0             | 0.495291856  |
| PVX_115085 | 0.166224591 | 0             | 0.870800656  |
| PVX_115090 | 0.078805602 | 0             | 0.76398423   |
| PVX_115095 | 0.359317338 | 0             | 0.111665936  |
| PVX_115100 | 0.359317338 | 0             | 0.186561728  |
| PVX_115105 | 0.078805602 | 0             | 0.724402151  |
| PVX_115110 | 0.007054102 | 0             | 1.608522335  |
| PVX_115115 | 0.036687443 | 0             | 1.484785309  |
| PVX_115120 | 0.036687443 | 0             | 1.145548035  |
| PVX_115125 | 0.007054102 | 0             | 2.080739998  |
| PVX_115130 | 0.016473156 | 0             | 1.717096142  |
| PVX_115135 | 0.002855585 | 0             | 2.741273044  |
| PVX_115140 | 0.016473156 | 0             | 1.603797532  |
| PVX_115145 | 0.359317338 | 0             | 0.24811202   |
| PVX_115155 | 3.76E-05    | 0             | 5.049567613  |
| PVX_115160 | 0.007054102 | 0             | 1.510894445  |
| PVX_115165 | 1           | 0             | 0            |
| PVX_115170 | 0.007054102 | 0             | 1.396619562  |
| PVX_115175 | 0.002855585 | 0             | 1.913285484  |
| PVX_115180 | 0.001084333 | 0             | 1.989221581  |
| PVX_115185 | 0.166224591 | 0             | 0.575034662  |
| PVX_115190 | 0.166224591 | 0             | 0.578738641  |

| GeneID     | Pvalue      | BackGroundPre | BackGroundDx |
|------------|-------------|---------------|--------------|
| PVX_115195 | 0.359317338 | 0             | 0.305630962  |
| PVX_115200 | 0.007054102 | 0             | 2.400370676  |
| PVX_115205 | 0.078805602 | 0             | 1.169301276  |
| PVX_115210 | 0.016473156 | 0             | 1.549980223  |
| PVX_115215 | 0.007054102 | 0             | 2.376990876  |
| PVX_115220 | 0.016473156 | 0             | 2.601052824  |
| PVX_115225 | 0.036687443 | 0             | 1.217976264  |
| PVX_115230 | 0.036687443 | 0             | 1.116662234  |
| PVX_115235 | 0.001084333 | 0             | 2.967942765  |
| PVX_115240 | 0.078805602 | 0             | 0.91495881   |
| PVX_115245 | 0.036687443 | 0             | 1.436027929  |
| PVX_115250 | 0.359317338 | 0             | 0.289001733  |
| PVX_115255 | 0.000383392 | 0             | 4.384953464  |
| PVX_115260 | 0.166224591 | 0             | 1.129132406  |
| PVX_115265 | 1           | 0             | 0            |
| PVX_115270 | 0.036687443 | 0             | 1.650847907  |
| PVX_115275 | 0.000383392 | 0             | 2.102391003  |
| PVX_115280 | 0.001084333 | 0             | 2.748283832  |
| PVX_115285 | 0.001084333 | 0             | 3.572818848  |
| PVX_115290 | 0.007054102 | 0             | 2.038448758  |
| PVX_115295 | 0.001084333 | 0             | 2.884520909  |
| PVX_115300 | 0.166224591 | 0             | 0.55391035   |
| PVX_115305 | 0.000125309 | 0             | 3.382647329  |
| PVX_115310 | 0.016473156 | 0             | 2.221294706  |
| PVX_115315 | 0.016473156 | 0             | 1.711921916  |
| PVX_115320 | 1           | 0             | 0            |
| PVX_115325 | 0.166224591 | 0             | 0.62264657   |
| PVX_115330 | 0.036687443 | 0             | 1.041780524  |
| PVX_115335 | 0.166224591 | 0             | 0.492648137  |
| PVX_115340 | 0.078805602 | 0             | 1.185827887  |
| PVX_115345 | 0.00037728  | 0.301955713   | 3.37246387   |
| PVX_115350 | 1           | 0             | 0            |
| PVX_115355 | 0.166224591 | 0             | 0.814009538  |
| PVX_115360 | 1           | 0             | 0            |
| PVX_115365 | 0.002855585 | 0             | 2.835740248  |
| PVX_115370 | 0.002855585 | 0             | 2.528692     |
| PVX_115375 | 0.002855585 | 0             | 2.956239571  |
| PVX_115380 | 0.002855585 | 0             | 2.4779964    |
| PVX_115385 | 0.016473156 | 0             | 1.700683384  |
| PVX_115390 | 0.078805602 | 0             | 1.52039599   |
| PVX_115395 | 0.016473156 | 0             | 1.423299085  |

| GeneID      | Pvalue      | BackGroundPre | BackGroundDx |
|-------------|-------------|---------------|--------------|
| PVX_115400  | 0.016473156 | 0             | 1.331847242  |
| PVX_115405  | 0.007054102 | 0             | 1.973603256  |
| PVX_115410  | 0.036687443 | 0             | 1.197789959  |
| PVX_115415  | 0.016473156 | 0             | 1.740305957  |
| PVX_115420  | 0.166224591 | 0             | 0.435079577  |
| PVX_115425  | 0.359317338 | 0             | 0.407751229  |
| PVX_115430  | 0.002855585 | 0             | 1.292383962  |
| PVX_115435  | 0.007054102 | 0             | 1.857578441  |
| PVX_115440  | 0.007054102 | 0             | 1.880564995  |
| PVX_115445  | 0.359317338 | 0             | 0.373191571  |
| PVX_115446  | 1           | 0             | 0            |
| PVX_115447  | 1           | 0             | 0            |
| PVX_115448  | 1           | 0             | 0            |
| PVX_115449  | 1           | 0             | 0            |
| PVX_115449a | 1           | 0             | 0            |
| PVX_115450  | 7.86E-05    | 0.401900215   | 5.516390637  |
| PVX_115455  | 0.359317338 | 0             | 0.332595081  |
| PVX_115460  | 0.001084333 | 0             | 3.16322597   |
| PVX_115465  | 0.007054102 | 0             | 2.101454179  |
| PVX_115470  | 0.000125309 | 0             | 4.108222126  |
| PVX_115475  | 0.359317338 | 0             | 0.290237592  |
| PVX_115480  | 1           | 0             | 0            |
| PVX_115490  | 1           | 0             | 0            |
| PVX_115985  | 0.359317338 | 0             | 0.25629817   |
| PVX_115990  | 1           | 0             | 0            |
| PVX_116485  | 1           | 0             | 0            |
| PVX_116490  | 0.007054102 | 0             | 2.010441406  |
| PVX_116495  | 0.359317338 | 0             | 0.283015403  |
| PVX_116500  | 0.036687443 | 0             | 1.720853727  |
| PVX_116505  | 0.359317338 | 0             | 0.211536626  |
| PVX_116510  | 0.016473156 | 0             | 1.904109687  |
| PVX_116515  | 0.359317338 | 0             | 0.133664082  |
| PVX_116520  | 0.078805602 | 0             | 0.78835302   |
| PVX_116525  | 0.359317338 | 0             | 0.411233135  |
| PVX_116530  | 0.007054102 | 0             | 1.743927617  |
| PVX_116535  | 0.036687443 | 0             | 0.970732561  |
| PVX_116540  | 0.016473156 | 0             | 1.850215596  |
| PVX_116545  | 0.166224591 | 0             | 0.578567198  |
| PVX_116550  | 0.007054102 | 0             | 1.048120536  |
| PVX_116555  | 1           | 0             | 0            |
| PVX_116557  | 0.002855585 | 0             | 2.731631016  |

| GeneID     | Pvalue      | BackGroundPre | BackGroundDx |
|------------|-------------|---------------|--------------|
| PVX_116560 | 0.001084333 | 0             | 2.774645022  |
| PVX_116565 | 1           | 0             | 0            |
| PVX_116570 | 1           | 0             | 0            |
| PVX_116575 | 1           | 0             | 0            |
| PVX_116580 | 0.078805602 | 0             | 1.093478304  |
| PVX_116582 | 0.078805602 | 0             | 0.982198079  |
| PVX_116585 | 0.359317338 | 0             | 0.194548556  |
| PVX_116590 | 0.359317338 | 0             | 0.170677084  |
| PVX_116595 | 0.036687443 | 0             | 1.6391412    |
| PVX_116600 | 0.078805602 | 0             | 1.150714793  |
| PVX_116603 | 0.036687443 | 0             | 1.206770197  |
| PVX_116604 | 0.036687443 | 0             | 0.873780377  |
| PVX_116610 | 0.000383392 | 0             | 3.997533972  |
| PVX_116615 | 0.078805602 | 0             | 1.269372079  |
| PVX_116620 | 0.000125309 | 0             | 4.862426331  |
| PVX_116625 | 0.078805602 | 0             | 1.313429917  |
| PVX_116630 | 1.03E-05    | 0             | 7.973390684  |
| PVX_116635 | 0.000125309 | 0             | 4.117674937  |
| PVX_116640 | 0.359317338 | 0             | 0.467061277  |
| PVX_116645 | 0.166224591 | 0             | 0.452822329  |
| PVX_116650 | 0.016473156 | 0             | 1.223818404  |
| PVX_116652 | 0.078805602 | 0             | 1.254668285  |
| PVX_116655 | 0.036687443 | 0             | 0.704729629  |
| PVX_116660 | 0.002855585 | 0             | 2.567421266  |
| PVX_116665 | 0.166224591 | 0             | 0.708485999  |
| PVX_116670 | 0.001084333 | 0             | 2.507231809  |
| PVX_116675 | 0.002855585 | 0             | 2.775078588  |
| PVX_116680 | 0.007054102 | 0             | 1.931966788  |
| PVX_116685 | 1           | 0             | 0            |
| PVX_116690 | 0.001084333 | 0             | 2.846710693  |
| PVX_116695 | 0.036687443 | 0             | 1.296117383  |
| PVX_116700 | 1.03E-05    | 0             | 7.051506216  |
| PVX_116705 | 0.078805602 | 0             | 1.030095767  |
| PVX_116710 | 0.002855585 | 0             | 2.976322928  |
| PVX_116715 | 3.76E-05    | 0             | 6.159365832  |
| PVX_116720 | 0.359317338 | 0             | 0.456382771  |
| PVX_116725 | 1           | 0             | 0            |
| PVX_116730 | 1           | 0             | 0            |
| PVX_116735 | 0.359317338 | 0             | 0.253886208  |
| PVX_116740 | 1           | 0             | 0            |
| PVX_116745 | 0.002855585 | 0             | 2.286697193  |

| GeneID     | Pvalue      | BackGroundPre | BackGroundDx |
|------------|-------------|---------------|--------------|
| PVX_116750 | 1           | 0             | 0            |
| PVX_116755 | 0.166224591 | 0             | 0.415452348  |
| PVX_116760 | 0.007054102 | 0             | 1.270237689  |
| PVX_116765 | 0.166224591 | 0             | 0.352414801  |
| PVX_116770 | 0.036687443 | 0             | 1.422460764  |
| PVX_116775 | 0.000383392 | 0             | 3.132733299  |
| PVX_116780 | 0.007054102 | 0             | 2.304023218  |
| PVX_116785 | 0.007054102 | 0             | 1.87983972   |
| PVX_116790 | 0.036687443 | 0             | 1.297478357  |
| PVX_116795 | 1           | 0             | 0            |
| PVX_116800 | 0.078805602 | 0             | 1.272523846  |
| PVX_116805 | 0.007054102 | 0             | 1.984831117  |
| PVX_116810 | 0.359317338 | 0             | 0.219164445  |
| PVX_116815 | 1           | 0             | 0            |
| PVX_116820 | 0.007054102 | 0             | 2.526136111  |
| PVX_116825 | 0.036687443 | 0             | 1.367745289  |
| PVX_116830 | 0.016473156 | 0             | 1.597971964  |
| PVX_116835 | 0.001084333 | 0             | 3.796036432  |
| PVX_116840 | 0.036687443 | 0             | 1.244350024  |
| PVX_116845 | 0.002855585 | 0             | 2.208701631  |
| PVX_116850 | 0.036687443 | 0             | 1.269253839  |
| PVX_116855 | 0.359317338 | 0             | 0.360134411  |
| PVX_116860 | 0.166224591 | 0             | 0.593995378  |
| PVX_116865 | 0.001084333 | 0             | 2.799473671  |
| PVX_116870 | 0.016473156 | 0             | 1.179588729  |
| PVX_116875 | 0.007054102 | 0             | 2.603948193  |
| PVX_116880 | 0.036687443 | 0             | 1.782267394  |
| PVX_116885 | 0.359317338 | 0             | 0.266709693  |
| PVX_116890 | 0.359317338 | 0             | 0.299481896  |
| PVX_116892 | 0.359317338 | 0             | 0.280438849  |
| PVX_116894 | 1           | 0             | 0            |
| PVX_116895 | 1           | 0             | 0            |
| PVX_116900 | 0.166224591 | 0             | 0.640473814  |
| PVX_116905 | 0.036687443 | 0             | 1.360611746  |
| PVX_116910 | 0.166224591 | 0             | 0.502310877  |
| PVX_116915 | 0.078805602 | 0             | 1.196765557  |
| PVX_116920 | 0.036687443 | 0             | 1.318260364  |
| PVX_116925 | 0.002855585 | 0             | 3.272900802  |
| PVX_116930 | 0.016473156 | 0             | 1.495063214  |
| PVX_116935 | 0.000383392 | 0             | 2.945462675  |
| PVX_116940 | 0.078805602 | 0             | 1.102552375  |

| GeneID     | Pvalue      | BackGroundPre | BackGroundDx |
|------------|-------------|---------------|--------------|
| PVX_116945 | 0.166224591 | 0             | 0.507631377  |
| PVX_116950 | 0.359317338 | 0             | 0.331071536  |
| PVX_116955 | 0.166224591 | 0             | 0.600288034  |
| PVX_116960 | 0.036687443 | 0             | 1.670165514  |
| PVX_116965 | 0.016473156 | 0             | 1.295507306  |
| PVX_116967 | 0.078805602 | 0             | 1.420736835  |
| PVX_116970 | 0.078805602 | 0             | 0.802893013  |
| PVX_116975 | 0.016473156 | 0             | 2.163130923  |
| PVX_116980 | 0.036687443 | 0             | 1.507213767  |
| PVX_116985 | 0.166224591 | 0             | 0.216439549  |
| PVX_116990 | 0.166224591 | 0             | 0.494027415  |
| PVX_116995 | 1           | 0             | 0            |
| PVX_117000 | 0.007054102 | 0             | 2.257539252  |
| PVX_117005 | 0.359317338 | 0             | 0.248458881  |
| PVX_117010 | 0.016473156 | 0             | 1.734999336  |
| PVX_117015 | 0.036687443 | 0             | 1.909055657  |
| PVX_117020 | 0.002855585 | 0             | 2.148677988  |
| PVX_117025 | 0.001084333 | 0             | 2.703702321  |
| PVX_117030 | 0.000125309 | 0             | 4.666844101  |
| PVX_117035 | 1           | 0             | 0            |
| PVX_117040 | 0.359317338 | 0             | 0.363445777  |
| PVX_117045 | 1           | 0             | 0            |
| PVX_117050 | 0.359317338 | 0             | 0.379195186  |
| PVX_117055 | 0.078805602 | 0             | 1.068660025  |
| PVX_117060 | 0.000383392 | 0             | 2.469320519  |
| PVX_117062 | 0.002855585 | 0             | 1.872460161  |
| PVX_117065 | 0.016473156 | 0             | 1.400983169  |
| PVX_117070 | 1           | 0             | 0            |
| PVX_117075 | 0.036687443 | 0             | 1.921133994  |
| PVX_117080 | 1           | 0             | 0            |
| PVX_117085 | 0.166224591 | 0             | 0.604755625  |
| PVX_117090 | 0.002855585 | 0             | 2.660706829  |
| PVX_117095 | 0.002855585 | 0             | 2.870195524  |
| PVX_117100 | 0.036687443 | 0             | 1.432779549  |
| PVX_117105 | 0.007054102 | 0             | 2.199401352  |
| PVX_117110 | 0.078805602 | 0             | 0.907606827  |
| PVX_117115 | 0.166224591 | 0             | 0.616506629  |
| PVX_117120 | 0.078805602 | 0             | 0.741659347  |
| PVX_117125 | 0.016473156 | 0             | 1.34573617   |
| PVX_117130 | 0.359317338 | 0             | 0.38454881   |
| PVX_117135 | 1           | 0             | 0            |

| GeneID     | Pvalue      | BackGroundPre | BackGroundDx |
|------------|-------------|---------------|--------------|
| PVX_117140 | 0.166224591 | 0             | 0.800011303  |
| PVX_117145 | 0.007054102 | 0             | 1.616617894  |
| PVX_117150 | 0.002855585 | 0             | 2.384237178  |
| PVX_117155 | 0.166224591 | 0             | 0.286652329  |
| PVX_117160 | 0.036687443 | 0             | 1.121079389  |
| PVX_117165 | 0.359317338 | 0             | 0.422010986  |
| PVX_117170 | 3.76E-05    | 0             | 6.230526931  |
| PVX_117175 | 1           | 0             | 0            |
| PVX_117180 | 1           | 0             | 0            |
| PVX_117185 | 0.166224591 | 0             | 0.670264974  |
| PVX_117190 | 0.166224591 | 0             | 0.492855553  |
| PVX_117192 | 0.078805602 | 0             | 1.828675188  |
| PVX_117195 | 0.007054102 | 0             | 1.44508616   |
| PVX_117200 | 0.036687443 | 0             | 1.364276028  |
| PVX_117205 | 0.007054102 | 0             | 1.989943187  |
| PVX_117210 | 0.002855585 | 0             | 3.131590813  |
| PVX_117215 | 0.016473156 | 0             | 1.693236181  |
| PVX_117220 | 0.359317338 | 0             | 0.441690037  |
| PVX_117225 | 0.016473156 | 0             | 1.993790691  |
| PVX_117230 | 0.007054102 | 0             | 1.585502119  |
| PVX_117240 | 0.036687443 | 0             | 0.843273     |
| PVX_117245 | 0.036687443 | 0             | 1.841161168  |
| PVX_117250 | 0.036687443 | 0             | 1.119602935  |
| PVX_117255 | 0.166224591 | 0             | 0.524557809  |
| PVX_117260 | 0.036687443 | 0             | 1.022861057  |
| PVX_117265 | 0.002855585 | 0             | 2.108028774  |
| PVX_117270 | 0.166224591 | 0             | 0.472384587  |
| PVX_117275 | 0.078805602 | 0             | 1.474847189  |
| PVX_117280 | 0.166224591 | 0             | 0.711038794  |
| PVX_117285 | 0.359317338 | 0             | 0.341964322  |
| PVX_117290 | 0.359317338 | 0             | 0.197301801  |
| PVX_117292 | 0.078805602 | 0             | 0.906442823  |
| PVX_117295 | 0.016473156 | 0             | 1.487765193  |
| PVX_117300 | 0.002855585 | 0             | 2.750083362  |
| PVX_117310 | 0.078805602 | 0             | 0.363130587  |
| PVX_117315 | 0.078805602 | 0             | 1.076636792  |
| PVX_117320 | 0.036687443 | 0             | 1.208505474  |
| PVX_117322 | 1.03E-05    | 0             | 8.566344518  |
| PVX_117325 | 0.016473156 | 0             | 1.54159779   |
| PVX_117330 | 0.359317338 | 0             | 0.307142453  |
| PVX_117335 | 1           | 0             | 0            |



| GeneID     | Pvalue      | BackGroundPre | BackGroundDx |
|------------|-------------|---------------|--------------|
| PVX_117340 | 0.036687443 | 0             | 0.510755293  |
| PVX_117345 | 0.036687443 | 0             | 1.117753972  |
| PVX_117350 | 0.359317338 | 0             | 0.564816885  |
| PVX_117356 | 0.078805602 | 0             | 0.793195383  |
| PVX_117357 | 0.359317338 | 0             | 0.431396643  |
| PVX_117360 | 0.001084333 | 0             | 2.431133498  |
| PVX_117365 | 0.166224591 | 0             | 0.341524269  |
| PVX_117370 | 1           | 0             | 0            |
| PVX_117375 | 0.016473156 | 0             | 1.684257014  |
| PVX_117380 | 0.359317338 | 0             | 0.358224721  |
| PVX_117385 | 0.166224591 | 0             | 0.607186332  |
| PVX_117390 | 0.000125309 | 0             | 5.261270236  |
| PVX_117395 | 0.002855585 | 0             | 3.036847898  |
| PVX_117400 | 0.359317338 | 0             | 0.245578426  |
| PVX_117405 | 0.016473156 | 0             | 1.553474115  |
| PVX_117410 | 0.007054102 | 0             | 2.049644615  |
| PVX_117415 | 0.166224591 | 0             | 0.576847204  |
| PVX_117420 | 3.76E-05    | 0             | 5.353182632  |
| PVX_117425 | 1           | 0             | 0            |
| PVX_117430 | 1           | 0             | 0            |
| PVX_117435 | 0.016473156 | 0             | 1.778082605  |
| PVX_117440 | 3.76E-05    | 0             | 6.348203455  |
| PVX_117445 | 0.016473156 | 0             | 2.024553586  |
| PVX_117450 | 0.359317338 | 0             | 0.201966538  |
| PVX_117455 | 0.078805602 | 0             | 1.069392611  |
| PVX_117460 | 1           | 0             | 0            |
| PVX_117465 | 1           | 0             | 0            |
| PVX_117470 | 0.000125309 | 0             | 4.399926254  |
| PVX_117475 | 0.036687443 | 0             | 1.666830514  |
| PVX_117480 | 0.007054102 | 0             | 2.033429545  |
| PVX_117485 | 0.078805602 | 0             | 0.753410965  |
| PVX_117490 | 0.001084333 | 0             | 3.034265291  |
| PVX_117495 | 0.078805602 | 0             | 0.998566768  |
| PVX_117500 | 0.016473156 | 0             | 1.795726572  |
| PVX_117505 | 0.002855585 | 0             | 2.161741922  |
| PVX_117510 | 0.000383392 | 0             | 3.382496035  |
| PVX_117515 | 0.359317338 | 0             | 0.349083079  |
| PVX_117525 | 0.016473156 | 0             | 1.340048694  |
| PVX_117530 | 0.016473156 | 0             | 1.82117168   |
| PVX_117535 | 0.007054102 | 0             | 1.826553526  |
| PVX_117540 | 0.166224591 | 0             | 0.576123254  |

| GeneID     | Pvalue      | BackGroundPre | BackGroundDx |
|------------|-------------|---------------|--------------|
| PVX_117545 | 0.166224591 | 0             | 0.68303906   |
| PVX_117550 | 0.002855585 | 0             | 2.062944351  |
| PVX_117555 | 0.036687443 | 0             | 1.924559204  |
| PVX_117560 | 0.166224591 | 0             | 1.369161182  |
| PVX_117565 | 0.001084333 | 0             | 2.290477074  |
| PVX_117570 | 0.078805602 | 0             | 0.477817335  |
| PVX_117575 | 0.359317338 | 0             | 0.28134922   |
| PVX_117580 | 0.001084333 | 0             | 2.193780496  |
| PVX_117585 | 0.002855585 | 0             | 2.282072084  |
| PVX_117590 | 0.359317338 | 0             | 0.281045914  |
| PVX_117595 | 0.016473156 | 0             | 1.147397087  |
| PVX_117600 | 0.002855585 | 0             | 2.627377593  |
| PVX_117605 | 0.002855585 | 0             | 3.761787309  |
| PVX_117610 | 0.166224591 | 0             | 0.463654028  |
| PVX_117615 | 0.002855585 | 0             | 2.742448854  |
| PVX_117620 | 0.078805602 | 0             | 1.185494198  |
| PVX_117625 | 0.002855585 | 0             | 2.3867797    |
| PVX_117630 | 0.016473156 | 0             | 1.903290395  |
| PVX_117635 | 0.016473156 | 0             | 2.091311507  |
| PVX_117640 | 0.036687443 | 0             | 1.032290246  |
| PVX_117645 | 0.359317338 | 0             | 0.207042214  |
| PVX_117650 | 0.007054102 | 0             | 2.18552209   |
| PVX_117655 | 0.002855585 | 0             | 2.534580781  |
| PVX_117660 | 0.359317338 | 0             | 0.337424967  |
| PVX_117665 | 1           | 0             | 0            |
| PVX_117670 | 0.078805602 | 0             | 1.131682712  |
| PVX_117675 | 0.166224591 | 0             | 0.377979672  |
| PVX_117680 | 0.166224591 | 0             | 0.557987189  |
| PVX_117685 | 1           | 0             | 0            |
| PVX_117690 | 0.002855585 | 0             | 2.156582413  |
| PVX_117695 | 0.001084333 | 0             | 3.045110071  |
| PVX_117700 | 1           | 0             | 0            |
| PVX_117705 | 0.359317338 | 0             | 0.311252933  |
| PVX_117710 | 1           | 0             | 0            |
| PVX_117715 | 0.166224591 | 0             | 0.826694169  |
| PVX_117720 | 1           | 0             | 0            |
| PVX_117725 | 0.359317338 | 0             | 0.205890079  |
| PVX_117730 | 1           | 0             | 0            |
| PVX_117735 | 1           | 0             | 0            |
| PVX_117740 | 1           | 0             | 0            |
| PVX_117745 | 3.76E-05    | 0             | 5.096069537  |

| GeneID     | Pvalue      | BackGroundPre | BackGroundDx |
|------------|-------------|---------------|--------------|
| PVX_117750 | 0.001084333 | 0             | 3.173701823  |
| PVX_117755 | 0.078805602 | 0             | 1.087852321  |
| PVX_117760 | 0.000383392 | 0             | 3.415934713  |
| PVX_117765 | 1           | 0             | 0            |
| PVX_117770 | 0.001084333 | 0             | 2.314051091  |
| PVX_117775 | 0.078805602 | 0             | 1.337603913  |
| PVX_117780 | 0.002855585 | 0             | 2.095794833  |
| PVX_117785 | 0.078805602 | 0             | 0.873214861  |
| PVX_117790 | 0.000125309 | 0             | 3.468525872  |
| PVX_117795 | 1.03E-05    | 0             | 6.603166138  |
| PVX_117800 | 0.078805602 | 0             | 0.625609848  |
| PVX_117805 | 1           | 0             | 0            |
| PVX_117810 | 0.016473156 | 0             | 1.246971577  |
| PVX_117812 | 1           | 0             | 0            |
| PVX_117815 | 0.359317338 | 0             | 0.131738113  |
| PVX_117825 | 0.359317338 | 0             | 0.198626719  |
| PVX_117830 | 0.002855585 | 0             | 2.203396031  |
| PVX_117835 | 0.166224591 | 0             | 0.739788247  |
| PVX_117840 | 0.036687443 | 0             | 1.57329668   |
| PVX_117845 | 0.007054102 | 0             | 2.238128276  |
| PVX_117850 | 0.007054102 | 0             | 1.307915472  |
| PVX_117855 | 0.007054102 | 0             | 2.446559957  |
| PVX_117860 | 0.001084333 | 0             | 2.294866637  |
| PVX_117865 | 0.359317338 | 0             | 0.293542171  |
| PVX_117870 | 0.036687443 | 0             | 1.353004732  |
| PVX_117875 | 0.036687443 | 0             | 1.460022353  |
| PVX_117880 | 0.166224591 | 0             | 0.345881547  |
| PVX_117885 | 0.007054102 | 0             | 1.581016334  |
| PVX_117890 | 0.036687443 | 0             | 1.066487423  |
| PVX_117895 | 1           | 0             | 0            |
| PVX_117900 | 1           | 0             | 0            |
| PVX_117905 | 0.078805602 | 0             | 1.085923094  |
| PVX_117910 | 0.007054102 | 0             | 1.408006721  |
| PVX_117915 | 0.007054102 | 0             | 2.615850801  |
| PVX_117920 | 0.000383392 | 0             | 2.638655385  |
| PVX_117925 | 1.42E-05    | 0.331698529   | 5.972543249  |
| PVX_117930 | 0.036687443 | 0             | 1.276356157  |
| PVX_117935 | 1           | 0             | 0            |
| PVX_117940 | 0.036687443 | 0             | 1.550118559  |
| PVX_117945 | 0.007054102 | 0             | 1.813944652  |
| PVX_117950 | 0.001084333 | 0             | 2.707906307  |

| GeneID     | Pvalue      | BackGroundPre | BackGroundDx |
|------------|-------------|---------------|--------------|
| PVX_117960 | 0.036687443 | 0             | 0.764208154  |
| PVX_117965 | 0.000383392 | 0             | 2.543722392  |
| PVX_117970 | 0.007054102 | 0             | 1.598119272  |
| PVX_117975 | 0.359317338 | 0             | 0.281308482  |
| PVX_117980 | 0.007054102 | 0             | 2.111425618  |
| PVX_117985 | 0.166224591 | 0             | 0.601636278  |
| PVX_117990 | 0.078805602 | 0             | 0.875724155  |
| PVX_117995 | 0.016473156 | 0             | 1.780874741  |
| PVX_118000 | 0.036687443 | 0             | 0.901271218  |
| PVX_118005 | 1           | 0             | 0            |
| PVX_118010 | 1           | 0             | 0            |
| PVX_118015 | 0.359317338 | 0             | 0.182403667  |
| PVX_118020 | 0.036687443 | 0             | 0.915323664  |
| PVX_118025 | 0.000383392 | 0             | 3.080727862  |
| PVX_118030 | 0.359317338 | 0             | 0.529416265  |
| PVX_118035 | 0.359317338 | 0             | 0.234322461  |
| PVX_118040 | 1           | 0             | 0            |
| PVX_118045 | 0.359317338 | 0             | 0.340187504  |
| PVX_118050 | 0.078805602 | 0             | 0.994925543  |
| PVX_118055 | 0.007054102 | 0             | 2.190395831  |
| PVX_118060 | 0.078805602 | 0             | 1.065461073  |
| PVX_118062 | 0.000383392 | 0             | 2.309589601  |
| PVX_118065 | 0.002855585 | 0             | 2.086006934  |
| PVX_118070 | 0.036687443 | 0             | 0.70525962   |
| PVX_118075 | 1           | 0             | 0            |
| PVX_118080 | 0.016473156 | 0             | 1.47021878   |
| PVX_118090 | 0.166224591 | 0             | 0.783596278  |
| PVX_118095 | 0.007054102 | 0             | 2.034248038  |
| PVX_118100 | 0.016473156 | 0             | 1.145493611  |
| PVX_118105 | 0.036687443 | 0             | 0.739469424  |
| PVX_118110 | 0.016473156 | 0             | 2.030134144  |
| PVX_118115 | 1           | 0             | 0            |
| PVX_118120 | 1           | 0             | 0            |
| PVX_118125 | 0.078805602 | 0             | 1.132667328  |
| PVX_118130 | 0.166224591 | 0             | 0.809685635  |
| PVX_118135 | 0.000125309 | 0             | 3.402340921  |
| PVX_118140 | 0.016473156 | 0             | 2.087732132  |
| PVX_118145 | 1.03E-05    | 0             | 6.67347106   |
| PVX_118150 | 0.166224591 | 0             | 0.546296578  |
| PVX_118155 | 0.016473156 | 0             | 1.934314619  |
| PVX_118160 | 0.166224591 | 0             | 0.653441206  |

| GeneID     | Pvalue      | BackGroundPre | BackGroundDx |
|------------|-------------|---------------|--------------|
| PVX_118162 | 0.166224591 | 0             | 0.728071534  |
| PVX_118165 | 0.001084333 | 0             | 1.973901482  |
| PVX_118170 | 0.359317338 | 0             | 0.243163325  |
| PVX_118175 | 0.359317338 | 0             | 0.182673262  |
| PVX_118180 | 3.76E-05    | 0             | 5.284303939  |
| PVX_118185 | 1           | 0             | 0            |
| PVX_118190 | 0.001084333 | 0             | 3.43406924   |
| PVX_118195 | 1           | 0             | 0            |
| PVX_118200 | 0.001084333 | 0             | 3.272148772  |
| PVX_118205 | 0.036687443 | 0             | 1.127810673  |
| PVX_118210 | 0.166224591 | 0             | 0.758316952  |
| PVX_118215 | 0.359317338 | 0             | 0.510249938  |
| PVX_118220 | 0.007054102 | 0             | 1.827561135  |
| PVX_118225 | 0.002855585 | 0             | 2.33859286   |
| PVX_118230 | 0.016473156 | 0             | 1.285070815  |
| PVX_118235 | 0.000383392 | 0             | 3.304259604  |
| PVX_118240 | 0.016473156 | 0             | 1.903349354  |
| PVX_118245 | 0.036687443 | 0             | 1.412305416  |
| PVX_118255 | 0.000125309 | 0             | 5.644556454  |
| PVX_118260 | 0.166224591 | 0             | 0.815525439  |
| PVX_118265 | 1           | 0             | 0            |
| PVX_118270 | 0.359317338 | 0             | 0.135260812  |
| PVX_118275 | 0.036687443 | 0             | 1.183718286  |
| PVX_118280 | 0.007054102 | 0             | 2.256389578  |
| PVX_118285 | 0.359317338 | 0             | 0.360534238  |
| PVX_118290 | 0.359317338 | 0             | 0.107494344  |
| PVX_118292 | 1           | 0             | 0            |
| PVX_118295 | 0.002855585 | 0             | 2.002554736  |
| PVX_118300 | 0.007054102 | 0             | 1.853846093  |
| PVX_118305 | 0.036687443 | 0             | 1.398461377  |
| PVX_118310 | 0.359317338 | 0             | 0.332507262  |
| PVX_118315 | 0.002855585 | 0             | 2.149919892  |
| PVX_118320 | 0.002855585 | 0             | 2.389814911  |
| PVX_118325 | 0.036687443 | 0             | 1.701789102  |
| PVX_118330 | 0.078805602 | 0             | 0.853246108  |
| PVX_118335 | 0.166224591 | 0             | 0.658112672  |
| PVX_118340 | 0.036687443 | 0             | 1.078632072  |
| PVX_118345 | 0.001084333 | 0             | 1.746363922  |
| PVX_118350 | 0.078805602 | 0             | 1.067346213  |
| PVX_118355 | 0.359317338 | 0             | 0.148985562  |
| PVX_118360 | 0.016473156 | 0             | 0.914639824  |

| GeneID     | Pvalue      | BackGroundPre | BackGroundDx |
|------------|-------------|---------------|--------------|
| PVX_118365 | 0.036687443 | 0             | 1.053046206  |
| PVX_118370 | 0.016473156 | 0             | 0.973218131  |
| PVX_118375 | 0.001084333 | 0             | 3.3228943    |
| PVX_118380 | 0.166224591 | 0             | 0.566306568  |
| PVX_118385 | 0.007054102 | 0             | 2.476416697  |
| PVX_118390 | 0.007054102 | 0             | 2.227272904  |
| PVX_118395 | 0.359317338 | 0             | 0.588529536  |
| PVX_118400 | 0.016473156 | 0             | 1.936653106  |
| PVX_118405 | 0.078805602 | 0             | 0.945766242  |
| PVX_118410 | 0.016473156 | 0             | 1.530705081  |
| PVX_118415 | 0.359317338 | 0             | 0.207106798  |
| PVX_118420 | 0.001084333 | 0             | 2.72846388   |
| PVX_118425 | 1           | 0             | 0            |
| PVX_118430 | 0.000383392 | 0             | 4.2974182    |
| PVX_118435 | 3.76E-05    | 0             | 5.396257333  |
| PVX_118440 | 1           | 0             | 0            |
| PVX_118445 | 1           | 0             | 0            |
| PVX_118450 | 0.002855585 | 0             | 2.381834338  |
| PVX_118455 | 0.002855585 | 0             | 2.307957244  |
| PVX_118460 | 1           | 0             | 0            |
| PVX_118465 | 0.359317338 | 0             | 0.219165045  |
| PVX_118470 | 0.359317338 | 0             | 0.277075543  |
| PVX_118475 | 0.036687443 | 0             | 1.090689825  |
| PVX_118480 | 0.078805602 | 0             | 1.015840127  |
| PVX_118485 | 0.166224591 | 0             | 0.558875334  |
| PVX_118490 | 0.166224591 | 0             | 0.375234996  |
| PVX_118495 | 0.000125309 | 0             | 5.460869735  |
| PVX_118500 | 0.036687443 | 0             | 1.47820774   |
| PVX_118505 | 0.016473156 | 0             | 1.795621758  |
| PVX_118510 | 0.016473156 | 0             | 1.84193537   |
| PVX_118515 | 0.078805602 | 0             | 1.026166142  |
| PVX_118520 | 0.007054102 | 0             | 2.503431193  |
| PVX_118525 | 0.016473156 | 0             | 1.183701968  |
| PVX_118530 | 0.166224591 | 0             | 0.705500575  |
| PVX_118535 | 0.002855585 | 0             | 1.673870779  |
| PVX_118540 | 0.007054102 | 0             | 2.028145095  |
| PVX_118545 | 3.76E-05    | 0             | 6.559698631  |
| PVX_118550 | 0.007054102 | 0             | 1.659666779  |
| PVX_118560 | 0.016473156 | 0             | 1.634263882  |
| PVX_118565 | 0.078805602 | 0             | 1.271888528  |
| PVX_118570 | 0.078805602 | 0             | 0.572889088  |

| GeneID     | Pvalue      | BackGroundPre | BackGroundDx |
|------------|-------------|---------------|--------------|
| PVX_118575 | 0.036687443 | 0             | 0.929351527  |
| PVX_118580 | 0.000125309 | 0             | 3.967157387  |
| PVX_118585 | 1           | 0             | 0            |
| PVX_118590 | 0.007054102 | 0             | 1.319035026  |
| PVX_118595 | 0.007054102 | 0             | 1.672150943  |
| PVX_118600 | 0.359317338 | 0             | 0.189206339  |
| PVX_118605 | 0.036687443 | 0             | 1.352960712  |
| PVX_118610 | 0.001084333 | 0             | 2.711918539  |
| PVX_118615 | 0.036687443 | 0             | 1.426031945  |
| PVX_118620 | 0.000125309 | 0             | 4.540655368  |
| PVX_118625 | 0.016473156 | 0             | 1.65149295   |
| PVX_118630 | 1           | 0             | 0            |
| PVX_118635 | 0.007054102 | 0             | 1.753698148  |
| PVX_118640 | 0.002855585 | 0             | 2.480533213  |
| PVX_118645 | 0.078805602 | 0             | 1.065711894  |
| PVX_118648 | 0.036687443 | 0             | 0.424246089  |
| PVX_118650 | 0.166224591 | 0             | 0.558585012  |
| PVX_118655 | 0.016473156 | 0             | 1.534830372  |
| PVX_118660 | 0.166224591 | 0             | 0.575325305  |
| PVX_118665 | 1           | 0             | 0            |
| PVX_118670 | 0.166224591 | 0             | 0.525315493  |
| PVX_118675 | 1           | 0             | 0            |
| PVX_118680 | 1           | 0             | 0            |
| PVX_118682 | 1           | 0             | 0            |
| PVX_118685 | 0.078805602 | 0             | 1.362476489  |
| PVX_118690 | 0.036687443 | 0             | 1.570981038  |
| PVX_118695 | 0.000125309 | 0             | 4.160032463  |
| PVX_118700 | 0.166224591 | 0             | 0.469064378  |
| PVX_118705 | 0.036687443 | 0             | 1.422178169  |
| PVX_119205 | 1           | 0             | 0            |
| PVX_119210 | 0.359317338 | 0             | 0.181423308  |
| PVX_119215 | 0.359317338 | 0             | 0.250480563  |
| PVX_119220 | 0.000383392 | 0             | 3.738510926  |
| PVX_119225 | 0.000125309 | 0             | 4.115724098  |
| PVX_119230 | 0.007054102 | 0             | 2.244560811  |
| PVX_119235 | 1           | 0             | 0            |
| PVX_119240 | 0.078805602 | 0             | 0.938984446  |
| PVX_119245 | 0.036687443 | 0             | 1.386475276  |
| PVX_119250 | 0.002855585 | 0             | 2.296613415  |
| PVX_119255 | 0.007054102 | 0             | 1.461024262  |
| PVX_119260 | 0.036687443 | 0             | 1.56035227   |

| GeneID     | Pvalue      | BackGroundPre | BackGroundDx |
|------------|-------------|---------------|--------------|
| PVX_119265 | 0.002855585 | 0             | 2.584191709  |
| PVX_119270 | 0.000125309 | 0             | 3.281685867  |
| PVX_119275 | 0.001084333 | 0             | 2.785912376  |
| PVX_119280 | 0.166224591 | 0             | 0.476180576  |
| PVX_119285 | 0.016473156 | 0             | 1.462086036  |
| PVX_119290 | 0.007054102 | 0             | 2.511333265  |
| PVX_119295 | 0.078805602 | 0             | 0.825268345  |
| PVX_119300 | 0.166224591 | 0             | 0.396682803  |
| PVX_119305 | 0.036687443 | 0             | 1.627163285  |
| PVX_119310 | 0.016473156 | 0             | 1.912614147  |
| PVX_119315 | 0.359317338 | 0             | 0.329959599  |
| PVX_119320 | 1           | 0             | 0            |
| PVX_119325 | 1           | 0             | 0            |
| PVX_119330 | 0.359317338 | 0             | 0.269564728  |
| PVX_119335 | 0.036687443 | 0             | 1.237504383  |
| PVX_119340 | 0.166224591 | 0             | 0.482061165  |
| PVX_119345 | 0.000125309 | 0             | 5.834004476  |
| PVX_119350 | 0.078805602 | 0             | 1.331003568  |
| PVX_119355 | 1           | 0             | 0            |
| PVX_119360 | 0.359317338 | 0             | 0.279908507  |
| PVX_119365 | 0.036687443 | 0             | 1.268211246  |
| PVX_119370 | 0.002855585 | 0             | 3.472970789  |
| PVX_119375 | 0.036687443 | 0             | 1.361170998  |
| PVX_119380 | 0.001084333 | 0             | 1.775536593  |
| PVX_119385 | 0.016473156 | 0             | 1.462318515  |
| PVX_119390 | 0.002855585 | 0             | 2.424480506  |
| PVX_119395 | 0.002855585 | 0             | 3.131835386  |
| PVX_119400 | 0.001084333 | 0             | 1.906015619  |
| PVX_119405 | 0.359317338 | 0             | 0.328827146  |
| PVX_119410 | 0.000125309 | 0             | 4.845885336  |
| PVX_119415 | 0.166224591 | 0             | 0.495439243  |
| PVX_119420 | 0.078805602 | 0             | 1.382901928  |
| PVX_119425 | 0.359317338 | 0             | 0.306361343  |
| PVX_119430 | 1           | 0             | 0            |
| PVX_119435 | 0.001084333 | 0             | 3.181684622  |
| PVX_119440 | 0.002855585 | 0             | 3.33939739   |
| PVX_119445 | 0.016473156 | 0             | 1.573024962  |
| PVX_119450 | 0.016473156 | 0             | 2.051186945  |
| PVX_119455 | 0.036687443 | 0             | 1.551488169  |
| PVX_119460 | 0.007054102 | 0             | 2.033811836  |
| PVX_119465 | 3.76E-05    | 0             | 4.859767595  |



| GeneID     | Pvalue      | BackGroundPre | BackGroundDx |
|------------|-------------|---------------|--------------|
| PVX_119470 | 3.76E-05    | 0             | 6.922878292  |
| PVX_119475 | 0.000383392 | 0             | 4.952235544  |
| PVX_119480 | 3.76E-05    | 0             | 5.623058249  |
| PVX_119485 | 0.166224591 | 0             | 0.478536573  |
| PVX_119490 | 0.016473156 | 0             | 1.875884189  |
| PVX_119495 | 0.016473156 | 0             | 1.825238933  |
| PVX_119500 | 0.036687443 | 0             | 1.258675252  |
| PVX_119505 | 0.036687443 | 0             | 0.787752985  |
| PVX_119510 | 0.000383392 | 0             | 3.133604591  |
| PVX_119515 | 0.016473156 | 0             | 0.717446473  |
| PVX_119520 | 0.000383392 | 0             | 3.318647904  |
| PVX_119525 | 0.166224591 | 0             | 0.428487638  |
| PVX_119530 | 3.76E-05    | 0             | 4.670119094  |
| PVX_119535 | 0.359317338 | 0             | 0.256060863  |
| PVX_119540 | 0.078805602 | 0             | 1.191998667  |
| PVX_119545 | 0.036687443 | 0             | 1.360461373  |
| PVX_119550 | 0.359317338 | 0             | 0.28899004   |
| PVX_119555 | 0.166224591 | 0             | 0.917032785  |
| PVX_119560 | 0.007054102 | 0             | 1.65572642   |
| PVX_119565 | 0.007054102 | 0             | 1.98119503   |
| PVX_119570 | 0.359317338 | 0             | 0.33550161   |
| PVX_119575 | 1           | 0             | 0            |
| PVX_119580 | 0.078805602 | 0             | 0.742609424  |
| PVX_119585 | 0.001084333 | 0             | 3.055305757  |
| PVX_119587 | 0.001084333 | 0             | 5.042139059  |
| PVX_119590 | 0.036687443 | 0             | 1.276025697  |
| PVX_119595 | 0.036687443 | 0             | 1.346464337  |
| PVX_119600 | 0.078805602 | 0             | 0.634281128  |
| PVX_119605 | 0.166224591 | 0             | 0.751262703  |
| PVX_119610 | 1           | 0             | 0            |
| PVX_119615 | 3.76E-05    | 0             | 2.516245945  |
| PVX_119620 | 0.001084333 | 0             | 2.404297754  |
| PVX_119625 | 0.359317338 | 0             | 0.204742504  |
| PVX_119630 | 3.76E-05    | 0             | 3.875324086  |
| PVX_119635 | 0.016473156 | 0             | 1.637131279  |
| PVX_119640 | 0.166224591 | 0             | 0.768397988  |
| PVX_119645 | 0.166224591 | 0             | 0.870289454  |
| PVX_119650 | 1           | 0             | 0            |
| PVX_119655 | 1           | 0             | 0            |
| PVX_119660 | 0.007054102 | 0             | 2.138067698  |
| PVX_119665 | 0.007054102 | 0             | 1.727890912  |

| GeneID     | Pvalue      | BackGroundPre | BackGroundDx |
|------------|-------------|---------------|--------------|
| PVX_119670 | 0.016473156 | 0             | 1.367846249  |
| PVX_119675 | 0.016473156 | 0             | 0.966127259  |
| PVX_119680 | 0.000383392 | 0             | 4.227283618  |
| PVX_119685 | 0.036687443 | 0             | 1.067407024  |
| PVX_119690 | 0.166224591 | 0             | 0.617629572  |
| PVX_119695 | 0.001084333 | 0             | 3.02738701   |
| PVX_119700 | 0.359317338 | 0             | 0.211236585  |
| PVX_119705 | 0.078805602 | 0             | 1.064388508  |
| PVX_119710 | 0.002855585 | 0             | 2.610852622  |
| PVX_119715 | 0.359317338 | 0             | 0.199249902  |
| PVX_119720 | 0.001084333 | 0             | 3.627112502  |
| PVX_119725 | 0.078805602 | 0             | 0.883222557  |
| PVX_119735 | 0.016473156 | 0             | 1.791101736  |
| PVX_119740 | 0.000125309 | 0             | 5.432409298  |
| PVX_119745 | 0.007054102 | 0             | 2.399668619  |
| PVX_119750 | 0.000383392 | 0             | 3.333946637  |
| PVX_119755 | 0.007054102 | 0             | 2.663867221  |
| PVX_119760 | 0.166224591 | 0             | 0.872533802  |
| PVX_119765 | 0.016473156 | 0             | 1.676136784  |
| PVX_119770 | 0.000383392 | 0             | 3.085370677  |
| PVX_119775 | 0.000125309 | 0             | 4.083704379  |
| PVX_119780 | 0.002855585 | 0             | 2.346814648  |
| PVX_119785 | 0.016473156 | 0             | 1.620884345  |
| PVX_119790 | 0.001084333 | 0             | 2.567261349  |
| PVX_119795 | 0.016473156 | 0             | 1.913022175  |
| PVX_119800 | 0.078805602 | 0             | 1.175910034  |
| PVX_119805 | 0.359317338 | 0             | 0.239756519  |
| PVX_119812 | 0.166224591 | 0             | 0.709181475  |
| PVX_119813 | 0.002855585 | 0             | 1.788488422  |
| PVX_119815 | 0.002855585 | 0             | 2.623771215  |
| PVX_119820 | 0.001084333 | 0             | 3.214557016  |
| PVX_119825 | 0.036687443 | 0             | 1.426703075  |
| PVX_119830 | 1           | 0             | 0            |
| PVX_120330 | 0.359317338 | 0             | 0.291843004  |
| PVX_120335 | 0.166224591 | 0             | 0.498451174  |
| PVX_120340 | 0.359317338 | 0             | 0.334060866  |
| PVX_120840 | 0.166224591 | 0             | 0.678187112  |
| PVX_120845 | 0.166224591 | 0             | 0.368445109  |
| PVX_121345 | 1           | 0             | 0            |
| PVX_121350 | 1           | 0             | 0            |
| PVX_121355 | 1           | 0             | 0            |

| GeneID     | Pvalue      | BackGroundPre | BackGroundDx |
|------------|-------------|---------------|--------------|
| PVX_121855 | 0.359317338 | 0             | 0.180532656  |
| PVX_121860 | 1           | 0             | 0            |
| PVX_121862 | 1           | 0             | 0            |
| PVX_121865 | 1           | 0             | 0            |
| PVX_121870 | 0.359317338 | 0             | 0.500230866  |
| PVX_121875 | 0.359317338 | 0             | 0.369891169  |
| PVX_121876 | 0.078805602 | 0             | 0.955730187  |
| PVX_121877 | 0.078805602 | 0             | 1.004064228  |
| PVX_121878 | 1           | 0             | 0            |
| PVX_121879 | 0.359317338 | 0             | 0.364126667  |
| PVX_121880 | 0.000125309 | 0             | 3.938903294  |
| PVX_121885 | 1           | 0             | 0            |
| PVX_121890 | 0.000383392 | 0             | 4.499860053  |
| PVX_121895 | 0.007054102 | 0             | 2.961088113  |
| PVX_121897 | 0.078805602 | 0             | 1.172425625  |
| PVX_121900 | 0.078805602 | 0             | 0.830365675  |
| PVX_121905 | 0.166224591 | 0             | 0.764622745  |
| PVX_121910 | 0.001084333 | 0             | 3.595249275  |
| PVX_121912 | 0.166224591 | 0             | 0.674488243  |
| PVX_121915 | 0.166224591 | 0             | 0.628075649  |
| PVX_121920 | 0.166224591 | 0             | 0.363812267  |
| PVX_121925 | 0.359317338 | 0             | 0.429532919  |
| PVX_121927 | 1           | 0             | 0            |
| PVX_121930 | 0.016473156 | 0             | 2.21004222   |
| PVX_121935 | 0.000125309 | 0             | 5.617304561  |
| PVX_121940 | 0.166224591 | 0             | 0.665392269  |
| PVX_121945 | 0.036687443 | 0             | 1.499636332  |
| PVX_121950 | 1           | 0             | 0            |
| PVX_121955 | 0.078805602 | 0             | 1.010809745  |
| PVX_121960 | 0.359317338 | 0             | 0.30044366   |
| PVX_121965 | 0.016473156 | 0             | 1.157847774  |
| PVX_121970 | 0.007054102 | 0             | 2.025107707  |
| PVX_121975 | 0.016473156 | 0             | 1.3424075    |
| PVX_121980 | 3.76E-05    | 0             | 5.990543882  |
| PVX_121985 | 0.016473156 | 0             | 1.534431786  |
| PVX_121990 | 0.036687443 | 0             | 1.518728913  |
| PVX_121995 | 0.016473156 | 0             | 2.169556169  |
| PVX_122000 | 0.078805602 | 0             | 1.139403084  |
| PVX_122005 | 0.002855585 | 0             | 2.560995268  |
| PVX_122010 | 0.016473156 | 0             | 1.487321895  |
| PVX_122015 | 0.166224591 | 0             | 0.394295169  |

| GeneID     | Pvalue      | BackGroundPre | BackGroundDx |
|------------|-------------|---------------|--------------|
| PVX_122020 | 0.078805602 | 0             | 0.925816364  |
| PVX_122025 | 0.016473156 | 0             | 1.471344398  |
| PVX_122030 | 0.002855585 | 0             | 0.949756461  |
| PVX_122035 | 1           | 0             | 0            |
| PVX_122040 | 0.166224591 | 0             | 0.488636593  |
| PVX_122045 | 3.76E-05    | 0             | 3.338562116  |
| PVX_122050 | 1           | 0             | 0            |
| PVX_122055 | 0.007054102 | 0             | 2.082127996  |
| PVX_122060 | 0.359317338 | 0             | 0.257716694  |
| PVX_122065 | 0.007054102 | 0             | 2.514084618  |
| PVX_122070 | 1           | 0             | 0            |
| PVX_122075 | 0.359317338 | 0             | 0.418613936  |
| PVX_122077 | 0.359317338 | 0             | 0.14932926   |
| PVX_122080 | 0.036687443 | 0             | 1.322019227  |
| PVX_122085 | 0.036687443 | 0             | 1.00192229   |
| PVX_122090 | 0.166224591 | 0             | 0.633200998  |
| PVX_122095 | 0.002855585 | 0             | 2.640994925  |
| PVX_122100 | 0.001084333 | 0             | 2.035537413  |
| PVX_122105 | 0.016473156 | 0             | 1.576880349  |
| PVX_122110 | 0.007054102 | 0             | 1.779867592  |
| PVX_122115 | 0.078805602 | 0             | 0.986086349  |
| PVX_122120 | 1           | 0             | 0            |
| PVX_122125 | 1           | 0             | 0            |
| PVX_122130 | 0.000125309 | 0             | 3.737354621  |
| PVX_122135 | 1           | 0             | 0            |
| PVX_122140 | 0.166224591 | 0             | 0.823872967  |
| PVX_122145 | 0.078805602 | 0             | 0.903365269  |
| PVX_122150 | 0.078805602 | 0             | 0.566570672  |
| PVX_122155 | 0.001084333 | 0             | 3.156385038  |
| PVX_122160 | 0.166224591 | 0             | 0.342937478  |
| PVX_122165 | 0.007054102 | 0             | 2.153565285  |
| PVX_122170 | 0.016473156 | 0             | 1.566187629  |
| PVX_122175 | 0.166224591 | 0             | 0.574076023  |
| PVX_122180 | 0.001084333 | 0             | 2.865585973  |
| PVX_122185 | 0.007054102 | 0             | 2.251833141  |
| PVX_122190 | 0.016473156 | 0             | 1.421486585  |
| PVX_122195 | 0.078805602 | 0             | 0.86646368   |
| PVX_122200 | 0.078805602 | 0             | 0.922009379  |
| PVX_122205 | 1           | 0             | 0            |
| PVX_122207 | 0.359317338 | 0             | 0.62255096   |
| PVX_122210 | 0.007054102 | 0             | 2.169291979  |

| GeneID     | Pvalue      | BackGroundPre | BackGroundDx |
|------------|-------------|---------------|--------------|
| PVX_122215 | 0.036687443 | 0             | 0.855870615  |
| PVX_122218 | 0.001084333 | 0             | 3.510149338  |
| PVX_122222 | 0.036687443 | 0             | 1.069011274  |
| PVX_122225 | 0.036687443 | 0             | 1.164830338  |
| PVX_122230 | 1           | 0             | 0            |
| PVX_122235 | 0.078805602 | 0             | 1.218606748  |
| PVX_122240 | 3.76E-05    | 0             | 3.406793355  |
| PVX_122245 | 1.03E-05    | 0             | 6.555894513  |
| PVX_122250 | 0.002855585 | 0             | 1.145986249  |
| PVX_122255 | 0.078805602 | 0             | 0.790183568  |
| PVX_122260 | 0.036687443 | 0             | 0.86237369   |
| PVX_122265 | 1           | 0             | 0            |
| PVX_122270 | 0.359317338 | 0             | 0.273579207  |
| PVX_122275 | 0.036687443 | 0             | 0.951551347  |
| PVX_122280 | 0.001084333 | 0             | 2.744109257  |
| PVX_122285 | 0.000125309 | 0             | 5.522805938  |
| PVX_122290 | 0.001084333 | 0             | 2.635685521  |
| PVX_122295 | 0.016473156 | 0             | 1.550359766  |
| PVX_122300 | 0.078805602 | 0             | 0.74216057   |
| PVX_122305 | 0.359317338 | 0             | 0.423583797  |
| PVX_122310 | 0.078805602 | 0             | 1.035348737  |
| PVX_122315 | 0.000125309 | 0             | 3.000950725  |
| PVX_122320 | 0.036687443 | 0             | 1.223030865  |
| PVX_122325 | 0.359317338 | 0             | 0.37699261   |
| PVX_122330 | 0.002855585 | 0             | 2.538282176  |
| PVX_122335 | 0.036687443 | 0             | 1.34562717   |
| PVX_122340 | 0.359317338 | 0             | 0.27564895   |
| PVX_122345 | 0.078805602 | 0             | 1.303697124  |
| PVX_122350 | 0.001084333 | 0             | 2.489685421  |
| PVX_122355 | 0.007054102 | 0             | 2.255335892  |
| PVX_122360 | 0.078805602 | 0             | 1.145072876  |
| PVX_122365 | 0.078805602 | 0             | 1.148145948  |
| PVX_122370 | 0.002855585 | 0             | 1.770784203  |
| PVX_122375 | 0.002855585 | 0             | 2.835682433  |
| PVX_122380 | 0.166224591 | 0             | 0.902089705  |
| PVX_122385 | 0.359317338 | 0             | 0.200576507  |
| PVX_122390 | 0.166224591 | 0             | 0.646948415  |
| PVX_122395 | 0.016473156 | 0             | 1.836426325  |
| PVX_122405 | 0.002855585 | 0             | 2.682856023  |
| PVX_122410 | 0.000383392 | 0             | 3.483292818  |
| PVX_122415 | 0.036687443 | 0             | 1.068552369  |

| GeneID     | Pvalue      | BackGroundPre | BackGroundDx |
|------------|-------------|---------------|--------------|
| PVX_122420 | 0.166224591 | 0             | 0.801404234  |
| PVX_122425 | 3.76E-05    | 0             | 5.648754269  |
| PVX_122430 | 0.016473156 | 0             | 1.636974281  |
| PVX_122435 | 0.078805602 | 0             | 0.886883953  |
| PVX_122440 | 0.166224591 | 0             | 0.335786417  |
| PVX_122445 | 0.016473156 | 0             | 1.616838794  |
| PVX_122450 | 0.036687443 | 0             | 1.350940703  |
| PVX_122455 | 0.016473156 | 0             | 1.245139148  |
| PVX_122458 | 1           | 0             | 0            |
| PVX_122460 | 0.036687443 | 0             | 1.493941598  |
| PVX_122465 | 0.078805602 | 0             | 0.598597684  |
| PVX_122470 | 3.76E-05    | 0             | 4.056210162  |
| PVX_122475 | 0.359317338 | 0             | 0.336008949  |
| PVX_122480 | 1           | 0             | 0            |
| PVX_122485 | 0.001084333 | 0             | 2.394095135  |
| PVX_122487 | 0.359317338 | 0             | 0.309586404  |
| PVX_122490 | 0.036687443 | 0             | 1.343771887  |
| PVX_122495 | 0.166224591 | 0             | 0.313948512  |
| PVX_122500 | 0.359317338 | 0             | 0.161760967  |
| PVX_122505 | 0.078805602 | 0             | 0.890814201  |
| PVX_122510 | 0.002855585 | 0             | 1.399499893  |
| PVX_122515 | 0.016473156 | 0             | 1.668188395  |
| PVX_122520 | 0.016473156 | 0             | 0.991962244  |
| PVX_122525 | 0.007054102 | 0             | 2.012497652  |
| PVX_122530 | 0.016473156 | 0             | 1.08365805   |
| PVX_122535 | 0.002855585 | 0             | 2.521000111  |
| PVX_122540 | 0.359317338 | 0             | 0.435715113  |
| PVX_122545 | 0.078805602 | 0             | 0.960844371  |
| PVX_122550 | 0.001084333 | 0             | 3.020894389  |
| PVX_122555 | 0.001084333 | 0             | 2.92478198   |
| PVX_122560 | 0.016473156 | 0             | 2.08876543   |
| PVX_122565 | 0.016473156 | 0             | 1.772541077  |
| PVX_122570 | 0.036687443 | 0             | 1.491990047  |
| PVX_122575 | 0.078805602 | 0             | 0.996357024  |
| PVX_122580 | 0.166224591 | 0             | 0.439478852  |
| PVX_122585 | 1           | 0             | 0            |
| PVX_122590 | 0.000125309 | 0             | 4.478019822  |
| PVX_122600 | 0.036687443 | 0             | 1.399498893  |
| PVX_122605 | 0.000125309 | 0             | 3.755539792  |
| PVX_122610 | 0.002855585 | 0             | 2.762885367  |
| PVX_122615 | 0.000383392 | 0             | 3.537068599  |

| GeneID     | Pvalue      | BackGroundPre | BackGroundDx |
|------------|-------------|---------------|--------------|
| PVX_122620 | 0.000125309 | 0             | 3.859663584  |
| PVX_122625 | 1           | 0             | 0            |
| PVX_122630 | 0.016473156 | 0             | 1.196589157  |
| PVX_122635 | 1           | 0             | 0            |
| PVX_122637 | 1           | 0             | 0            |
| PVX_122640 | 0.359317338 | 0             | 0.259540311  |
| PVX_122645 | 0.002855585 | 0             | 2.047983523  |
| PVX_122650 | 0.007054102 | 0             | 1.727365654  |
| PVX_122655 | 0.359317338 | 0             | 0.366492383  |
| PVX_122660 | 0.007054102 | 0             | 2.465953945  |
| PVX_122665 | 0.036687443 | 0             | 1.178448388  |
| PVX_122670 | 0.002855585 | 0             | 2.330702959  |
| PVX_122675 | 0.016473156 | 0             | 1.438695269  |
| PVX_122680 | 0.001084333 | 0             | 2.062921047  |
| PVX_122685 | 0.000383392 | 0             | 3.426830699  |
| PVX_122690 | 0.007054102 | 0             | 2.468231388  |
| PVX_122695 | 1           | 0             | 0            |
| PVX_122700 | 0.036687443 | 0             | 1.190655548  |
| PVX_122705 | 0.078805602 | 0             | 1.52650928   |
| PVX_122710 | 0.000125309 | 0             | 5.430185553  |
| PVX_122715 | 0.036687443 | 0             | 1.099961686  |
| PVX_122720 | 1           | 0             | 0            |
| PVX_122725 | 0.002855585 | 0             | 2.577575806  |
| PVX_122730 | 1           | 0             | 0            |
| PVX_122735 | 0.166224591 | 0             | 0.522268169  |
| PVX_122740 | 0.036687443 | 0             | 1.179115001  |
| PVX_122742 | 1           | 0             | 0            |
| PVX_122745 | 0.078805602 | 0             | 0.954120044  |
| PVX_122750 | 0.359317338 | 0             | 0.181618174  |
| PVX_122755 | 0.002855585 | 0             | 2.461615291  |
| PVX_122760 | 0.359317338 | 0             | 0.201835008  |
| PVX_122765 | 0.016473156 | 0             | 1.307625351  |
| PVX_122770 | 0.002855585 | 0             | 2.111592154  |
| PVX_122775 | 0.166224591 | 0             | 0.691745514  |
| PVX_122780 | 0.000383392 | 0             | 2.960650684  |
| PVX_122785 | 0.007054102 | 0             | 1.666479763  |
| PVX_122790 | 0.359317338 | 0             | 0.406385951  |
| PVX_122795 | 0.078805602 | 0             | 0.819840214  |
| PVX_122800 | 0.166224591 | 0             | 0.594945534  |
| PVX_122805 | 0.359317338 | 0             | 0.197375404  |
| PVX_122810 | 0.016473156 | 0             | 1.388299972  |

| GeneID     | Pvalue      | BackGroundPre | BackGroundDx |
|------------|-------------|---------------|--------------|
| PVX_122815 | 0.016473156 | 0             | 1.875985103  |
| PVX_122820 | 0.166224591 | 0             | 0.686039192  |
| PVX_122825 | 0.359317338 | 0             | 0.31006905   |
| PVX_122830 | 0.078805602 | 0             | 1.153914009  |
| PVX_122835 | 0.359317338 | 0             | 0.417156444  |
| PVX_122840 | 0.016473156 | 0             | 1.857384024  |
| PVX_122845 | 0.166224591 | 0             | 0.405761526  |
| PVX_122850 | 0.007054102 | 0             | 2.177425626  |
| PVX_122855 | 0.036687443 | 0             | 1.669166921  |
| PVX_122860 | 1           | 0             | 0            |
| PVX_122865 | 1           | 0             | 0            |
| PVX_122870 | 0.078805602 | 0             | 1.236134413  |
| PVX_122875 | 0.000383392 | 0             | 2.126436013  |
| PVX_122880 | 0.359317338 | 0             | 0.274005501  |
| PVX_122885 | 0.166224591 | 0             | 0.527797645  |
| PVX_122890 | 1           | 0             | 0            |
| PVX_122895 | 0.016473156 | 0             | 1.982799933  |
| PVX_122900 | 1           | 0             | 0            |
| PVX_122905 | 0.002855585 | 0             | 2.225191104  |
| PVX_122910 | 0.016473156 | 0             | 2.134095236  |
| PVX_122915 | 0.166224591 | 0             | 0.715501994  |
| PVX_122920 | 0.001084333 | 0             | 2.138324795  |
| PVX_122925 | 1           | 0             | 0            |
| PVX_122930 | 0.016473156 | 0             | 1.981291065  |
| PVX_122935 | 0.359317338 | 0             | 0.394111069  |
| PVX_122940 | 0.078805602 | 0             | 0.657872517  |
| PVX_122945 | 0.002855585 | 0             | 2.041692028  |
| PVX_122947 | 0.166224591 | 0             | 0.872035863  |
| PVX_122950 | 0.002855585 | 0             | 2.220683591  |
| PVX_122955 | 0.078805602 | 0             | 0.83971237   |
| PVX_122956 | 1           | 0             | 0            |
| PVX_122957 | 1           | 0             | 0            |
| PVX_122958 | 1           | 0             | 0            |
| PVX_122960 | 0.007054102 | 0             | 2.297335447  |
| PVX_122962 | 0.359317338 | 0             | 0.605866946  |
| PVX_122965 | 0.166224591 | 0             | 0.350454506  |
| PVX_122970 | 1           | 0             | 0            |
| PVX_122975 | 1           | 0             | 0            |
| PVX_122980 | 0.166224591 | 0             | 0.779785683  |
| PVX_122985 | 0.002855585 | 0             | 2.052866639  |
| PVX_122990 | 0.166224591 | 0             | 0.958899111  |



| GeneID     | Pvalue      | BackGroundPre | BackGroundDx |
|------------|-------------|---------------|--------------|
| PVX_122995 | 0.000125309 | 0             | 3.464600994  |
| PVX_123000 | 0.001084333 | 0             | 2.755608644  |
| PVX_123005 | 0.016473156 | 0             | 1.456954195  |
| PVX_123010 | 0.001084333 | 0             | 2.940232883  |
| PVX_123015 | 1           | 0             | 0            |
| PVX_123020 | 0.078805602 | 0             | 0.775954517  |
| PVX_123025 | 0.000383392 | 0             | 3.66600045   |
| PVX_123030 | 0.001084333 | 0             | 3.347125826  |
| PVX_123035 | 1           | 0             | 0            |
| PVX_123040 | 1           | 0             | 0            |
| PVX_123045 | 1           | 0             | 0            |
| PVX_123050 | 0.078805602 | 0             | 0.692402168  |
| PVX_123055 | 0.007054102 | 0             | 1.704568096  |
| PVX_123060 | 1.03E-05    | 0             | 7.164112637  |
| PVX_123065 | 0.036687443 | 0             | 1.244546146  |
| PVX_123070 | 1.03E-05    | 0             | 6.656510573  |
| PVX_123075 | 1.03E-05    | 0             | 6.016681524  |
| PVX_123080 | 0.166224591 | 0             | 0.612821057  |
| PVX_123085 | 0.016473156 | 0             | 1.195726041  |
| PVX_123090 | 0.002855585 | 0             | 2.54095775   |
| PVX_123095 | 1           | 0             | 0            |
| PVX_123100 | 0.001084333 | 0             | 2.909251842  |
| PVX_123105 | 0.000125309 | 0             | 4.265769857  |
| PVX_123110 | 0.000383392 | 0             | 4.235329456  |
| PVX_123115 | 0.016473156 | 0             | 1.591351586  |
| PVX_123120 | 1           | 0             | 0            |
| PVX_123125 | 0.359317338 | 0             | 0.246594211  |
| PVX_123130 | 0.166224591 | 0             | 0.802844291  |
| PVX_123135 | 0.036687443 | 0             | 1.311472254  |
| PVX_123140 | 0.166224591 | 0             | 0.584208572  |
| PVX_123145 | 0.001084333 | 0             | 2.661346259  |
| PVX_123150 | 0.007054102 | 0             | 2.230501553  |
| PVX_123155 | 0.359317338 | 0             | 0.285223739  |
| PVX_123158 | 0.359317338 | 0             | 0.219782638  |
| PVX_123162 | 0.016473156 | 0             | 1.874457591  |
| PVX_123165 | 0.000383392 | 0             | 2.499412711  |
| PVX_123170 | 0.007054102 | 0             | 1.967077046  |
| PVX_123175 | 0.016473156 | 0             | 1.115868349  |
| PVX_123180 | 0.166224591 | 0             | 0.47870964   |
| PVX_123185 | 0.036687443 | 0             | 1.09165517   |
| PVX_123190 | 0.166224591 | 0             | 0.372936407  |

| GeneID     | Pvalue      | BackGroundPre | BackGroundDx |
|------------|-------------|---------------|--------------|
| PVX_123195 | 0.036687443 | 0             | 0.914990319  |
| PVX_123200 | 0.007054102 | 0             | 2.276435793  |
| PVX_123205 | 0.007054102 | 0             | 1.086186523  |
| PVX_123210 | 0.016473156 | 0             | 1.351022972  |
| PVX_123215 | 0.036687443 | 0             | 1.198560302  |
| PVX_123220 | 0.078805602 | 0             | 0.860776249  |
| PVX_123225 | 1           | 0             | 0            |
| PVX_123230 | 0.002855585 | 0             | 2.821667996  |
| PVX_123235 | 0.166224591 | 0             | 0.959780562  |
| PVX_123240 | 1.03E-05    | 0             | 5.319184801  |
| PVX_123245 | 0.036687443 | 0             | 1.325951322  |
| PVX_123250 | 0.002855585 | 0             | 2.349848325  |
| PVX_123260 | 0.001084333 | 0             | 2.705983352  |
| PVX_123265 | 0.036687443 | 0             | 1.343220649  |
| PVX_123270 | 0.036687443 | 0             | 1.526697418  |
| PVX_123275 | 0.007054102 | 0             | 2.291082132  |
| PVX_123283 | 0.036687443 | 0             | 0.903425379  |
| PVX_123290 | 0.078805602 | 0             | 0.549682059  |
| PVX_123295 | 0.016473156 | 0             | 1.533631124  |
| PVX_123300 | 0.166224591 | 0             | 0.209710395  |
| PVX_123305 | 0.078805602 | 0             | 1.184913358  |
| PVX_123307 | 0.016473156 | 0             | 1.569191269  |
| PVX_123310 | 0.000383392 | 0             | 2.56436716   |
| PVX_123315 | 0.078805602 | 0             | 0.840889699  |
| PVX_123320 | 0.036687443 | 0             | 0.923874755  |
| PVX_123325 | 0.036687443 | 0             | 1.254031451  |
| PVX_123330 | 0.078805602 | 0             | 0.924989252  |
| PVX_123335 | 0.036687443 | 0             | 1.590197264  |
| PVX_123340 | 0.000125309 | 0             | 3.893486153  |
| PVX_123345 | 0.166224591 | 0             | 0.661607152  |
| PVX_123350 | 0.078805602 | 0             | 0.877633977  |
| PVX_123355 | 0.001084333 | 0             | 3.35855977   |
| PVX_123357 | 0.166224591 | 0             | 0.963594196  |
| PVX_123360 | 1           | 0             | 0            |
| PVX_123365 | 1           | 0             | 0            |
| PVX_123370 | 1           | 0             | 0            |
| PVX_123375 | 0.078805602 | 0             | 1.248660181  |
| PVX_123380 | 0.002855585 | 0             | 2.05007689   |
| PVX_123385 | 0.002855585 | 0             | 2.032892401  |
| PVX_123390 | 0.036687443 | 0             | 1.304208723  |
| PVX_123395 | 0.002855585 | 0             | 1.720216385  |

| GeneID     | Pvalue      | BackGroundPre | BackGroundDx |
|------------|-------------|---------------|--------------|
| PVX_123400 | 0.016473156 | 0             | 1.57306728   |
| PVX_123405 | 0.000383392 | 0             | 3.468244389  |
| PVX_123407 | 0.036687443 | 0             | 2.014153594  |
| PVX_123410 | 0.359317338 | 0             | 0.338547792  |
| PVX_123415 | 1           | 0             | 0            |
| PVX_123420 | 0.078805602 | 0             | 0.967967506  |
| PVX_123425 | 1           | 0             | 0            |
| PVX_123430 | 0.002855585 | 0             | 2.510607636  |
| PVX_123435 | 0.016473156 | 0             | 1.979404427  |
| PVX_123440 | 0.166224591 | 0             | 0.387361529  |
| PVX_123445 | 1           | 0             | 0            |
| PVX_123450 | 0.001084333 | 0             | 3.754192034  |
| PVX_123455 | 0.007054102 | 0             | 1.881458429  |
| PVX_123457 | 1           | 0             | 0            |
| PVX_123460 | 0.078805602 | 0             | 0.607017528  |
| PVX_123465 | 0.359317338 | 0             | 0.393391817  |
| PVX_123470 | 1           | 0             | 0            |
| PVX_123475 | 0.002855585 | 0             | 2.377398467  |
| PVX_123480 | 0.078805602 | 0             | 0.95330316   |
| PVX_123485 | 0.359317338 | 0             | 0.317178715  |
| PVX_123490 | 0.036687443 | 0             | 1.665879542  |
| PVX_123495 | 0.007054102 | 0             | 2.396183981  |
| PVX_123500 | 0.007054102 | 0             | 1.622194147  |
| PVX_123505 | 3.76E-05    | 0             | 5.461680094  |
| PVX_123510 | 1           | 0             | 0            |
| PVX_123515 | 0.016473156 | 0             | 1.263976663  |
| PVX_123517 | 1           | 0             | 0            |
| PVX_123520 | 0.007054102 | 0             | 1.618197397  |
| PVX_123525 | 0.359317338 | 0             | 0.40760863   |
| PVX_123530 | 1           | 0             | 0            |
| PVX_123535 | 0.002855585 | 0             | 1.977453588  |
| PVX_123540 | 0.002855585 | 0             | 2.381129194  |
| PVX_123545 | 0.078805602 | 0             | 0.773822632  |
| PVX_123550 | 0.001084333 | 0             | 2.739941065  |
| PVX_123555 | 1           | 0             | 0            |
| PVX_123560 | 0.166224591 | 0             | 0.498225084  |
| PVX_123565 | 0.359317338 | 0             | 0.291084972  |
| PVX_123570 | 0.078805602 | 0             | 0.977553583  |
| PVX_123575 | 1           | 0             | 0            |
| PVX_123580 | 0.359317338 | 0             | 0.381105897  |
| PVX_123585 | 0.007054102 | 0             | 1.481246592  |

| GeneID     | Pvalue      | BackGroundPre | BackGroundDx |
|------------|-------------|---------------|--------------|
| PVX_123590 | 0.036687443 | 0             | 1.189329744  |
| PVX_123592 | 0.007054102 | 0             | 2.043665794  |
| PVX_123595 | 0.036687443 | 0             | 1.093707687  |
| PVX_123597 | 0.036687443 | 0             | 1.210939268  |
| PVX_123600 | 1           | 0             | 0            |
| PVX_123605 | 1           | 0             | 0            |
| PVX_123610 | 0.078805602 | 0             | 0.633707058  |
| PVX_123615 | 0.359317338 | 0             | 0.175349492  |
| PVX_123620 | 0.002855585 | 0             | 2.155589089  |
| PVX_123625 | 0.001084333 | 0             | 2.513319601  |
| PVX_123630 | 1           | 0             | 0            |
| PVX_123632 | 1           | 0             | 0            |
| PVX_123635 | 0.078805602 | 0             | 1.221942886  |
| PVX_123640 | 0.359317338 | 0             | 0.372420668  |
| PVX_123645 | 0.002855585 | 0             | 2.223973871  |
| PVX_123650 | 0.359317338 | 0             | 0.110568582  |
| PVX_123655 | 0.359317338 | 0             | 0.09715523   |
| PVX_123660 | 0.036687443 | 0             | 1.327279884  |
| PVX_123665 | 0.078805602 | 0             | 0.968442003  |
| PVX_123670 | 0.166224591 | 0             | 0.714220478  |
| PVX_123675 | 1           | 0             | 0            |
| PVX_123680 | 1           | 0             | 0            |
| PVX_123682 | 0.016473156 | 0             | 1.941792759  |
| PVX_123685 | 0.036687443 | 0             | 0.829744447  |
| PVX_123690 | 1           | 0             | 0            |
| PVX_123695 | 0.078805602 | 0             | 1.292881024  |
| PVX_123700 | 1           | 0             | 0            |
| PVX_123705 | 1           | 0             | 0            |
| PVX_123710 | 0.016473156 | 0             | 1.355175708  |
| PVX_123715 | 0.002855585 | 0             | 2.772554771  |
| PVX_123720 | 0.007054102 | 0             | 1.648369331  |
| PVX_123725 | 0.078805602 | 0             | 0.742597492  |
| PVX_123730 | 0.078805602 | 0             | 0.77330379   |
| PVX_123735 | 0.166224591 | 0             | 0.583716781  |
| PVX_123740 | 0.007054102 | 0             | 2.398126246  |
| PVX_123745 | 0.000383392 | 0             | 3.166607282  |
| PVX_123750 | 0.016473156 | 0             | 0.9695054    |
| PVX_123755 | 0.036687443 | 0             | 1.526298247  |
| PVX_123760 | 0.016473156 | 0             | 1.065285251  |
| PVX_123765 | 1           | 0             | 0            |
| PVX_123770 | 0.359317338 | 0             | 0.300089131  |

| GeneID     | Pvalue      | BackGroundPre | BackGroundDx |
|------------|-------------|---------------|--------------|
| PVX_123775 | 0.078805602 | 0             | 0.889557259  |
| PVX_123780 | 1           | 0             | 0            |
| PVX_123785 | 0.016473156 | 0             | 2.142428909  |
| PVX_123790 | 0.036687443 | 0             | 1.184072602  |
| PVX_123795 | 0.007054102 | 0             | 1.336106822  |
| PVX_123800 | 0.001084333 | 0             | 2.580046953  |
| PVX_123805 | 0.007054102 | 0             | 0.98647627   |
| PVX_123810 | 0.016473156 | 0             | 1.142478932  |
| PVX_123815 | 0.007054102 | 0             | 2.390337784  |
| PVX_123820 | 0.016473156 | 0             | 1.536328863  |
| PVX_123825 | 0.000383392 | 0             | 4.03327139   |
| PVX_123830 | 0.016473156 | 0             | 1.825675366  |
| PVX_123835 | 1           | 0             | 0            |
| PVX_123840 | 0.078805602 | 0             | 0.675422423  |
| PVX_123845 | 0.000383392 | 0             | 3.755752543  |
| PVX_123850 | 0.007054102 | 0             | 1.93960639   |
| PVX_123855 | 0.166224591 | 0             | 0.836677237  |
| PVX_123860 | 0.016473156 | 0             | 2.007943417  |
| PVX_123865 | 0.016473156 | 0             | 1.3614205    |
| PVX_123870 | 0.007054102 | 0             | 2.0658746    |
| PVX_123875 | 0.078805602 | 0             | 1.475031762  |
| PVX_123880 | 0.078805602 | 0             | 0.659247094  |
| PVX_123885 | 0.002855585 | 0             | 1.865203247  |
| PVX_123890 | 0.007054102 | 0             | 1.594404088  |
| PVX_123895 | 0.166224591 | 0             | 0.688915321  |
| PVX_123900 | 0.016473156 | 0             | 1.877971443  |
| PVX_123905 | 0.001084333 | 0             | 2.98091694   |
| PVX_123910 | 0.001084333 | 0             | 2.4861938    |
| PVX_123915 | 0.007054102 | 0             | 1.568956073  |
| PVX_123920 | 0.000125309 | 0             | 3.556869779  |
| PVX_123925 | 0.359317338 | 0             | 0.306015914  |
| PVX_123930 | 0.078805602 | 0             | 0.746760802  |
| PVX_123935 | 0.001084333 | 0             | 3.634851417  |
| PVX_123940 | 0.359317338 | 0             | 0.221258869  |
| PVX_123945 | 0.001084333 | 0             | 3.324012387  |
| PVX_123950 | 0.016473156 | 0             | 1.272490524  |
| PVX_123955 | 0.036687443 | 0             | 1.041950321  |
| PVX_123960 | 0.001084333 | 0             | 3.684593822  |
| PVX_123965 | 0.036687443 | 0             | 1.350197073  |
| PVX_123970 | 0.007054102 | 0             | 2.452861118  |
| PVX_123975 | 0.166224591 | 0             | 0.558508919  |

| GeneID     | Pvalue      | BackGroundPre | BackGroundDx |
|------------|-------------|---------------|--------------|
| PVX_123980 | 1           | 0             | 0            |
| PVX_123985 | 0.001084333 | 0             | 2.881103172  |
| PVX_123990 | 0.078805602 | 0             | 0.514052025  |
| PVX_123995 | 0.359317338 | 0             | 0.314592683  |
| PVX_124000 | 0.078805602 | 0             | 0.664047771  |
| PVX_124005 | 0.007054102 | 0             | 1.206585536  |
| PVX_124010 | 0.078805602 | 0             | 0.845246427  |
| PVX_124015 | 0.007054102 | 0             | 1.767775117  |
| PVX_124020 | 0.002855585 | 0             | 2.033706016  |
| PVX_124025 | 0.166224591 | 0             | 0.561551691  |
| PVX_124030 | 0.036687443 | 0             | 1.67289495   |
| PVX_124035 | 0.007054102 | 0             | 2.15193111   |
| PVX_124040 | 0.166224591 | 0             | 0.489623122  |
| PVX_124045 | 0.078805602 | 0             | 0.779177457  |
| PVX_124050 | 0.002855585 | 0             | 2.357580882  |
| PVX_124055 | 0.016473156 | 0             | 1.729701456  |
| PVX_124060 | 1           | 0             | 0            |
| PVX_124065 | 0.016473156 | 0             | 1.399155548  |
| PVX_124070 | 0.001084333 | 0             | 2.008648728  |
| PVX_124075 | 0.016473156 | 0             | 1.225026032  |
| PVX_124080 | 0.016473156 | 0             | 1.14101818   |
| PVX_124085 | 1.03E-05    | 0             | 4.106991476  |
| PVX_124090 | 0.001084333 | 0             | 2.890403085  |
| PVX_124095 | 0.000125309 | 0             | 5.406349123  |
| PVX_124100 | 0.000383392 | 0             | 3.979306874  |
| PVX_124105 | 0.016473156 | 0             | 1.653951974  |
| PVX_124110 | 0.166224591 | 0             | 0.739271562  |
| PVX_124115 | 0.078805602 | 0             | 0.774265975  |
| PVX_124120 | 0.359317338 | 0             | 0.167896251  |
| PVX_124130 | 0.166224591 | 0             | 0.647534817  |
| PVX_124140 | 0.016473156 | 0             | 1.246524948  |
| PVX_124145 | 1           | 0             | 0            |
| PVX_124150 | 0.002855585 | 0             | 2.344407344  |
| PVX_124155 | 1           | 0             | 0            |
| PVX_124160 | 0.001084333 | 0             | 3.341691181  |
| PVX_124165 | 0.007054102 | 0             | 2.051541349  |
| PVX_124170 | 0.007054102 | 0             | 2.28559463   |
| PVX_124175 | 0.002855585 | 0             | 2.254286352  |
| PVX_124180 | 0.016473156 | 0             | 1.744456266  |
| PVX_124185 | 0.166224591 | 0             | 0.564888755  |
| PVX_124190 | 0.166224591 | 0             | 0.446762307  |

| GeneID     | Pvalue      | BackGroundPre | BackGroundDx |
|------------|-------------|---------------|--------------|
| PVX_124195 | 0.002855585 | 0             | 2.774432422  |
| PVX_124200 | 0.078805602 | 0             | 0.915534454  |
| PVX_124700 | 1           | 0             | 0            |
| PVX_124705 | 0.359317338 | 0             | 0.276431491  |
| PVX_124708 | 0.078805602 | 0             | 0.770417257  |
| PVX_124710 | 1           | 0             | 0            |
| PVX_124712 | 1           | 0             | 0            |
| PVX_124715 | 1           | 0             | 0            |
| PVX_124720 | 0.359317338 | 0             | 0.209020051  |
| PVX_124725 | 1           | 0             | 0            |
| PVX_125726 | 1           | 0             | 0            |
| PVX_125728 | 1           | 0             | 0            |
| PVX_125730 | 0.016473156 | 0             | 1.678333099  |
| PVX_125735 | 0.016473156 | 0             | 1.593567847  |
| PVX_125738 | 1           | 0             | 0            |
| PVX_127260 | 1           | 0             | 0            |
| PVX_128260 | 0.359317338 | 0             | 0.284966422  |
| PVX_129260 | 0.166224591 | 0             | 1.284249066  |
| PVX_130260 | 0.166224591 | 0             | 0.986134906  |
| PVX_131260 | 0.078805602 | 0             | 1.053898226  |
| PVX_132260 | 1           | 0             | 0            |
| PVX_133260 | 0.359317338 | 0             | 0.284966422  |
| PVX_134260 | 1           | 0             | 0            |
| PVX_135260 | 1           | 0             | 0            |
| PVX_136260 | 0.001084333 | 0             | 3.099673882  |
| PVX_137260 | 1           | 0             | 0            |
| PVX_138260 | 1.03E-05    | 0             | 6.567999429  |
| PVX_139260 | 1           | 0             | 0            |
| PVX_140260 | 0.078805602 | 0             | 0.902608287  |
| PVX_141260 | 1           | 0             | 0            |
| PVX_142260 | 1           | 0             | 0            |
| PVX_143260 | 1           | 0             | 0            |
| PVX_144260 | 1           | 0             | 0            |
| PVX_145260 | 1           | 0             | 0            |
| PVX_146260 | 1           | 0             | 0            |
| PVX_147260 | 0.000125309 | 0             | 5.138418746  |
| PVX_148260 | 1           | 0             | 0            |
| PVX_149260 | 1           | 0             | 0            |
| PVX_150260 | 0.359317338 | 0             | 0.254424199  |
| PVX_151260 | 1           | 0             | 0            |
| PVX_152260 | 1           | 0             | 0            |

| GeneID     | Pvalue      | BackGroundPre | BackGroundDx |
|------------|-------------|---------------|--------------|
| PVX_153260 | 1           | 0             | 0            |
| PVX_154260 | 1           | 0             | 0            |
| PVX_155260 | 1           | 0             | 0            |
| PVX_156260 | 1           | 0             | 0            |
| PVX_157260 | 1           | 0             | 0            |
| PVX_158260 | 1           | 0             | 0            |
| PVX_159260 | 1           | 0             | 0            |
| PVX_160260 | 1           | 0             | 0            |
| PVX_161260 | 1           | 0             | 0            |
| PVX_162260 | 1           | 0             | 0            |
| PVX_163260 | 1           | 0             | 0            |
| PVX_163265 | 1           | 0             | 0            |
| PVX_164265 | 1           | 0             | 0            |
| PVX_165265 | 1           | 0             | 0            |
| PVX_166265 | 1           | 0             | 0            |
| PVX_167265 | 1           | 0             | 0            |
| PVX_168265 | 1           | 0             | 0            |
| PVX_168270 | 1           | 0             | 0            |
| PVX_169270 | 1           | 0             | 0            |
| PVX_170270 | 0.359317338 | 0             | 0.365142007  |
| PVX_171270 | 1           | 0             | 0            |
| PVX_172270 | 1           | 0             | 0            |
| PVX_173270 | 1           | 0             | 0            |
| PVX_174270 | 1           | 0             | 0            |
| PVX_175270 | 0.166224591 | 0             | 0.620706333  |
| PVX_176270 | 1           | 0             | 0            |
| PVX_176275 | 1           | 0             | 0            |
| PVX_177275 | 0.359317338 | 0             | 0.366084257  |
| PVX_178275 | 1           | 0             | 0            |
| PVX_179275 | 1           | 0             | 0            |
| PVX_180275 | 1           | 0             | 0            |
| PVX_181275 | 1           | 0             | 0            |
| PVX_182275 | 1           | 0             | 0            |
| PVX_183275 | 0.359317338 | 0             | 0.2925088    |
| PVX_183280 | 0.078805602 | 0             | 0.939382643  |
| PVX_184280 | 1           | 0             | 0            |
| PVX_184285 | 1           | 0             | 0            |
| PVX_185285 | 1           | 0             | 0            |
| PVX_186285 | 1           | 0             | 0            |
| PVX_186290 | 1           | 0             | 0            |
| PVX_187290 | 1           | 0             | 0            |



| GeneID     | Pvalue      | BackGroundPre | BackGroundDx |
|------------|-------------|---------------|--------------|
| PVX_188290 | 1           | 0             | 0            |
| PVX_191290 | 0.036687443 | 0             | 1.14239854   |
| PVX_192290 | 0.036687443 | 0             | 1.099944925  |
| PVX_193290 | 0.359317338 | 0             | 0.286182265  |
| PVX_195290 | 0.001084333 | 0             | 2.330662045  |
| PVX_196290 | 0.016473156 | 0             | 1.397718601  |
| PVX_198290 | 0.078805602 | 0             | 0.751000132  |
| PVX_200290 | 0.001084333 | 0             | 2.050669943  |
| PVX_201290 | 0.001084333 | 0             | 2.118657989  |
| PVX_202290 | 0.016473156 | 0             | 1.237499267  |
| PVX_203290 | 0.036687443 | 0             | 1.289175184  |
| PVX_206290 | 0.001084333 | 0             | 2.049791817  |
| PVX_208290 | 0.001084333 | 0             | 1.973341732  |
| PVX_209290 | 0.078805602 | 0             | 0.592696931  |
| PVX_210290 | 0.166224591 | 0             | 0.47893653   |
| PVX_211290 | 0.078805602 | 0             | 0.697709311  |
| PVX_212290 | 1           | 0             | 0            |
| PVX_213290 | 1           | 0             | 0            |
| PVX_214290 | 0.359317338 | 0             | 0.192118339  |
| PVX_215290 | 0.359317338 | 0             | 0.192118339  |
| PVX_216290 | 0.036687443 | 0             | 0.910888491  |
| PVX_217290 | 0.036687443 | 0             | 0.971515076  |
| PVX_218290 | 0.036687443 | 0             | 0.910888491  |
| PVX_220290 | 3.76E-05    | 0             | 5.86037746   |
| PVX_221290 | 0.166224591 | 0             | 0.480840735  |
| PVX_222290 | 0.016473156 | 0             | 1.374272912  |
| PVX_223290 | 0.166224591 | 0             | 0.486443362  |
| PVX_224290 | 0.078805602 | 0             | 0.758843729  |
| PVX_225290 | 0.166224591 | 0             | 0.498348461  |
| PVX_226290 | 0.036687443 | 0             | 1.096891228  |
| PVX_227290 | 1           | 0             | 0            |
| PVX_228290 | 0.036687443 | 0             | 0.869276445  |
| PVX_230290 | 0.359317338 | 0             | 0.247006373  |
| PVX_231290 | 0.036687443 | 0             | 1.487590806  |
| PVX_235290 | 1           | 0             | 0            |
| PVX_237290 | 0.036687443 | 0             | 0.910888491  |
| PVX_238290 | 0.166224591 | 0             | 0.661977658  |
| PVX_239290 | 0.166224591 | 0             | 0.57089208   |
| PVX_240290 | 0.002855585 | 0             | 2.299465121  |
| PVX_241290 | 1           | 0             | 0            |
| PVX_241295 | 1           | 0             | 0            |

| GeneID     | Pvalue      | BackGroundPre | BackGroundDx |
|------------|-------------|---------------|--------------|
| PVX_242295 | 1           | 0             | 0            |
| PVX_243295 | 1           | 0             | 0            |
| PVX_244295 | 1           | 0             | 0            |
| PVX_245295 | 1           | 0             | 0            |
| PVX_246295 | 0.078805602 | 0             | 0.799193304  |
| PVX_248300 | 1           | 0             | 0            |
| PVX_249300 | 0.166224591 | 0             | 0.440364568  |
| PVX_250300 | 0.036687443 | 0             | 1.362635195  |
| PVX_251300 | 0.359317338 | 0             | 0.313093893  |
| PVX_252300 | 0.001084333 | 0             | 3.066523469  |
| PVX_253300 | 0.007054102 | 0             | 1.804891507  |
| PVX_254300 | 0.016473156 | 0             | 1.463236897  |
