# Supplementary material for: Plasmodium vivax readiness to transmit: implication for malaria eradication
Source: Springer Nature journal article supplement (doi:10.1186/s12918-018-0669-4), 2019-01-11
Supplement: 12918_2018_669_MOESM4_ESM.pdf [file 12918_2018_669_MOESM4_ESM.pdf]

**S3 Table**

| Gene ID    | Ortholog Pfalciaparum | Protein Marker candidates (Surface Exposed Markers) | Transcript Marker candidates (Most) | Gene Description                                    | Number of patients with Gene Expression | Protein Length | TM Domains | SignalP Scores | Gene Expression in FPKM |           |           |           |           |           |           |           |           |            |            |            |   |   |         |         |   |
|------------|-----------------------|-----------------------------------------------------|-------------------------------------|-----------------------------------------------------|-----------------------------------------|----------------|------------|----------------|-------------------------|-----------|-----------|-----------|-----------|-----------|-----------|-----------|-----------|------------|------------|------------|---|---|---------|---------|---|
|            |                       |                                                     |                                     |                                                     |                                         |                |            |                | Low                     |           |           |           | Medium    |           |           |           | High      |            |            |            |   |   |         |         |   |
|            |                       |                                                     |                                     |                                                     |                                         |                |            |                | Patient 1               | Patient 2 | Patient 3 | Patient 4 | Patient 5 | Patient 6 | Patient 7 | Patient 8 | Patient 9 | Patient 10 | Patient 11 | Patient 12 |   |   |         |         |   |
| PVX_081315 | PF3D7_0109400         |                                                     | Early                               | tubulin-specific chaperone a, putative              | 2                                       | 168            | 0          |                | 0                       | 0         | 421.478   | 0         | 0         | 0         | 0         | 0         | 0         | 0          | 0          | 0          | 0 | 0 | 67.2619 | 0       |   |
| PVX_088175 | PF3D7_0807400         |                                                     | Marker                              | hypothetical protein, conserved                     | 7                                       | 208            | 0          |                | 0                       | 68.8695   | 0         | 631.062   | 93.9254   | 0         | 150.988   | 136.979   | 186.828   | 0          | 176.624    | 0          | 0 | 0 | 176.624 | 0       |   |
| PVX_093660 | PF3D7_0801600         |                                                     | Male Early                          | hypothetical protein, conserved                     | 6                                       | 125            | 1          |                | 0                       | 100.284   | 0         | 0         | 45.6136   | 0         | 398.868   | 398.868   | 108.79    | 50.3879    | 57.1237    | 0          | 0 | 0 | 57.1237 | 0       |   |
| PVX_090185 | PF3D7_0422900         |                                                     | Male Late                           | hypothetical protein, conserved                     | 3                                       | 248            | 0          |                | 0                       | 0         | 0         | 0         | 52.3516   | 0         | 0         | 0         | 124.814   | 115.59     | 0          | 0          | 0 | 0 | 0       | 0       |   |
| PVX_114130 | PF3D7_0620100         |                                                     | Early                               | hypothetical protein, conserved                     | 4                                       | 128            | 0          |                | 0                       | 0         | 0         | 0         | 0         | 0         | 244.897   | 221.875   | 60.5131   | 0          | 31.7714    | 0          | 0 | 0 | 31.7714 | 0       |   |
| PVX_111495 | PF3D7_1024300         |                                                     | Early                               | hypothetical protein, conserved                     | 7                                       | 143            | 0          |                | 0                       | 85.9303   | 306.41    | 0         | 78.151    | 0         | 0         | 683.599   | 93.2306   | 86.3833    | 293.755    | 0          | 0 | 0 | 293.755 | 0       |   |
| PVX_080590 | PF3D7_0513000         | Late Marker                                         | Late                                | hypothetical protein, conserved                     | 1                                       | 271            | 0 SP       |                | 0                       | 0         | 0         | 0         | 0         | 0         | 0         | 0         | 0         | 0          | 36.0339    | 0          | 0 | 0 | 36.0339 | 0       |   |
| PVX_117165 | PF3D7_1466000         | Marker                                              | Marker                              | hypothetical protein, conserved                     | 1                                       | 313            | 0 SP       |                | 0                       | 0         | 0         | 0         | 0         | 0         | 157.243   | 0         | 0         | 0          | 0          | 0          | 0 | 0 | 0       | 0       |   |
| PVX_081290 | PF3D7_0110000         | Marker                                              | Marker                              | hypothetical protein                                | 2                                       | 234            | 0 SP       |                | 178.36                  | 0         | 0         | 0         | 0         | 0         | 0         | 0         | 0         | 0          | 0          | 0          | 0 | 0 | 71.0163 | 0       |   |
| PVX_085785 | PF3D7_1413300         |                                                     | Marker                              | hypothetical protein                                | 1                                       | 74             | 1          |                | 0                       | 0         | 0         | 0         | 171.908   | 0         | 0         | 0         | 0         | 0          | 0          | 0          | 0 | 0 | 0       | 0       |   |
| PVX_099745 | PF3D7_0926400         |                                                     | Marker                              | transporter, putative                               | 3                                       | 550            | 13         |                | 0                       | 62.9853   | 0         | 0         | 14.3078   | 0         | 0         | 62.6481   | 0         | 0          | 0          | 0          | 0 | 0 | 0       | 35.9184 | 0 |
| PVX_079940 | PF3D7_0526100         |                                                     | Marker                              | hypothetical protein, conserved                     | 6                                       | 364            | 3 SP       |                | 0                       | 0         | 0         | 321.208   | 31.8716   | 0         | 0         | 139.439   | 76.0731   | 35.2524    | 39.954     | 0          | 0 | 0 | 39.954  | 0       |   |
| PVX_001035 | PF3D7_0404200         |                                                     | Marker                              | hypothetical protein, conserved                     | 5                                       | 176            | 0          |                | 273.048                 | 0         | 0         | 0         | 87.0847   | 0         | 0         | 0         | 207.224   | 95.8312    | 54.3655    | 0          | 0 | 0 | 54.3655 | 0       |   |
| PVX_091595 | PF3D7_1119200         |                                                     | Marker                              | conserved protein, unknown function                 | 3                                       | 176            | 0          |                | 0                       | 191.17    | 0         | 0         | 0         | 0         | 0         | 0         | 0         | 95.8312    | 54.3655    | 0          | 0 | 0 | 54.3655 | 0       |   |
| PVX_003620 | PF3D7_0203800         |                                                     | Marker                              | hypothetical protein, conserved                     | 6                                       | 553            | 0          |                | 61.3491                 | 0         | 152.599   | 0         | 19.4649   | 0         | 93.8454   | 170.417   | 116.23    | 86.218     | 24.4232    | 0          | 0 | 0 | 24.4232 | 0       |   |
| PVX_116975 | PF3D7_1469800         |                                                     | Marker                              | hypothetical protein, conserved                     | 5                                       | 171            | 0          |                | 0                       | 400.746   | 0         | 0         | 182.582   | 0         | 0         | 0         | 217.182   | 100.421    | 113.948    | 0          | 0 | 0 | 113.948 | 0       |   |
| PVX_091045 | PF3D7_0816800         |                                                     | Marker                              | DNA repair protein RAD51, putative (RAD51)          | 4                                       | 350            | 0          |                | 0                       | 0         | 0         | 674.262   | 100.353   | 0         | 0         | 0         | 0         | 110.982    | 83.8581    | 0          | 0 | 0 | 83.8581 | 0       |   |
| PVX_000930 | PF3D7_0406200         | Early Marker                                        | Marker                              | sexual stage antigen s16, putative                  | 3                                       | 140            | 2 SP       |                | 0                       | 0         | 0         | 0         | 0         | 0         | 0         | 0         | 48.6911   | 45.1121    | 51.1377    | 0          | 0 | 0 | 51.1377 | 0       |   |
| PVX_087130 | PF3D7_0931500         | Marker                                              | Marker                              | hypothetical protein, conserved                     | 3                                       | 212            | 1 SP       |                | 150.313                 | 0         | 0         | 0         | 23.8539   | 0         | 0         | 0         | 56.9612   | 105.615    | 14.9603    | 0          | 0 | 0 | 14.9603 | 0       |   |
| PVX_098835 | PF3D7_0907800         | Marker                                              | Marker                              | ribosomal protein L35, putative                     | 4                                       | 162            | 0 SP       |                | 0                       | 0         | 0         | 0         | 199.966   | 0         | 0         | 436.056   | 0         | 109.894    | 62.3593    | 0          | 0 | 0 | 62.3593 | 0       |   |
| PVX_095330 | PF3D7_0318000         | Marker                                              | Marker                              | hypothetical protein, conserved                     | 1                                       | 216            | 0 SP       |                | 0                       | 0         | 0         | 0         | 43.8499   | 0         | 0         | 0         | 0         | 0          | 27.461     | 0          | 0 | 0 | 27.461  | 0       |   |
| PVX_080680 | PF3D7_0511100         | Marker                                              | Marker                              | hypothetical protein, conserved                     | 1                                       | 121            | 0 SP       |                | 0                       | 0         | 0         | 0         | 0         | 0         | 0         | 0         | 43.8418   | 0          | 23.024     | 0          | 0 | 0 | 23.024  | 0       |   |
| PVX_092700 | PF3D7_1141900         |                                                     | Marker                              | inner membrane complex protein 1b, putative (IMC1b) | 1                                       | 516            | 0          |                | 0                       | 39.1309   | 0         | 0         | 0         | 0         | 0         | 0         | 0         | 0          | 0          | 0          | 0 | 0 | 0       | 0       |   |
| PVX_000915 | PF3D7_0406600         |                                                     | Marker                              | hypothetical protein, conserved                     | 2                                       | 144            | 0          |                | 386.15                  | 0         | 0         | 0         | 0         | 0         | 0         | 0         | 0         | 0          | 0          | 0          | 0 | 0 | 153.793 | 0       |   |
| PVX_119435 | PF3D7_0306200         |                                                     | Marker                              | activator of Hsp90 ATPase, putative (AHA1)          | 8                                       | 373            | 0          |                | 0                       | 48.8707   | 0         | 223.807   | 66.6285   | 0         | 107.085   | 97.2107   | 106.079   | 196.7      | 222.891    | 0          | 0 | 0 | 222.891 | 0       |   |
| PVX_095430 | PF3D7_0316100         |                                                     | Marker                              | hypothetical protein, conserved                     | 6                                       | 324            | 0          |                | 115.961                 | 0         | 0         | 0         | 0         | 0         | 177.694   | 0         | 131.867   | 122.192    | 92.3348    | 376.205    | 0 | 0 | 92.3348 | 376.205 |   |
| PVX_084687 | PF3D7_1437100         |                                                     | Marker                              | conserved Plasmodium protein, unknown function      | 3                                       | 164            | 2 SP       |                | 0                       | 0         | 0         | 0         | 0         | 0         | 0         | 427.061   | 0         | 215.275    | 61.0764    | 0          | 0 | 0 | 61.0764 | 0       |   |
| PVX_114900 | PF3D7_1358600         |                                                     | Marker                              | hypothetical protein, conserved                     | 2                                       | 965            | 0          |                | 0                       | 0         | 0         | 82.0019   | 0         | 0         | 0         | 0         | 0         | 0          | 0          | 0          | 0 | 0 | 5.11019 | 41.5408 |   |
| PVX_122487 | PF3D7_1313300         |                                                     | Marker                              | peptidyl-prolyl cis-trans isomerase, putative       | 1                                       | 215            | 0          |                | 0                       | 0         | 0         | 0         | 0         | 0         | 0         | 0         | 0         | 0          | 0          | 0          | 0 | 0 | 0       | 40.6001 | 0 |
| PVX_085300 | PF3D7_1423600         |                                                     | Male Late                           | calcium-dependent protein kinase, putative          | 1                                       | 284            | 0          |                | 0                       | 0         | 0         | 0         | 0         | 0         | 0         | 81.3578   | 0         | 20.5813    | 0          | 0          | 0 | 0 | 0       | 0       |   |
| PVX_091115 | PF3D7_1108800         |                                                     | Male Late                           | hypothetical protein, conserved                     | 1                                       | 150            | 0          |                | 0                       | 0         | 0         | 0         | 0         | 0         | 0         | 0         | 136.05    | 0          | 0          | 0          | 0 | 0 | 0       | 0       |   |
| PVX_116610 | PF3D7_1325300         |                                                     | Male Late                           | hypothetical protein                                | 9                                       | 177            | 0          |                | 264.868                 | 92.554    | 330.076   | 0         | 84.1844   | 0         | 0         | 184.068   | 150.617   | 604.67     | 263.636    | 214.925    | 0 | 0 | 263.636 | 214.925 |   |
| PVX_089735 | PF3D7_0415600         |                                                     |                                     | adenylate kinase 1, putative                        | 9                                       | 231            | 0          |                | 416.851                 | 72.8044   | 0         | 0         | 33.0995   | 0         | 159.632   | 144.803   | 78.9985   | 36.6064    | 62.2343    | 168.99     | 0 | 0 | 62.2343 | 168.99  |   |
| PVX_113530 | PF3D7_0607300         |                                                     |                                     | uroporphyrinogen III decarboxylase, putative (UROD) | 3                                       | 422            | 1 SP       |                | 0                       | 0         | 0         | 0         | 0         | 0         | 0         | 116.655   | 31.823    | 0          | 66.8605    | 0          | 0 | 0 | 66.8605 | 0       |   |
| PVX_081307 | PF3D7_0109600         |                                                     |                                     | cold-shock protein, putative                        | 3                                       | 144            | 0          |                | 0                       | 0         | 0         | 0         | 0         | 0         | 0         | 538.042   | 0         | 135.45     | 153.793    | 0          | 0 | 0 | 153.793 | 0       |   |
| PVX_088230 | PF3D7_0806400         |                                                     |                                     | glycosyltransferase, putative                       | 1                                       | 186            | 0          |                | 0                       | 0         | 0         | 0         | 0         | 0         | 0         | 0         | 94.9087   | 0          | 0          | 0          | 0 | 0 | 0       | 0       |   |
| PVX_093600 | PF3D7_0802900         |                                                     | Female Early                        | hypothetical protein, conserved                     | 1                                       | 136            | 0          |                | 0                       | 0         | 0         | 0         | 0         | 0         | 0         | 0         | 0         | 0          | 30.8898    | 0          | 0 | 0 | 30.8898 | 0       |   |
| PVX_079725 | PF3D7_0530800         | Late Male Marker                                    | Male Late                           | hypothetical protein, conserved                     | 1                                       | 250            | 0 SP       |                | 0                       | 321.481   | 0         | 0         | 0         | 0         | 0         | 0         | 0         | 0          | 25.6795    | 0          | 0 | 0 | 25.6795 | 0       |   |
| PVX_118405 | PF3D7_1441700         |                                                     | Male Late                           | metalloprotease, putative                           | 2                                       | 483            | 0          |                | 71.666                  | 0         | 0         | 0         | 0         | 0         | 0         | 0         | 0         | 75.5338    | 14.2654    | 0          | 0 | 0 | 14.2654 | 0       |   |
| PVX_079980 | PF3D7_0525300         |                                                     | Male Late                           | hypothetical protein, conserved                     | 2                                       | 523            | 1          |                | 65.383                  | 0         | 0         | 209.064   | 0         | 0         | 0         | 0         | 0         | 0          | 26.0292    | 0          | 0 | 0 | 26.0292 | 0       |   |
| PVX_123505 | PF3D7_1216500         | Early Male Marker                                   |                                     | male development gene 1, putative (MDV1)            | 11                                      | 288            | 0 SP       |                | 159.987                 | 111.734   | 995.401   | 255.887   | 126.96    | 0         | 489.754   | 888.994   | 454.718   | 533.947    | 589.157    | 777.769    | 0 | 0 | 589.157 | 777.769 |   |
| PVX_098695 | PF3D7_0905000         |                                                     |                                     | hypothetical protein, conserved                     | 5                                       | 282            | 0          |                | 0                       | 96.8615   | 0         | 444.05    | 0         | 0         | 0         | 0         | 0         | 52.5403    | 48.6724    | 193.12     | 0 | 0 | 193.12  | 0       |   |
| PVX_099465 | PF3D7_0921000.1       |                                                     |                                     | ubiquitin-conjugating enzyme E2, putative           | 10                                      | 163            | 0          |                | 180.519                 | 378.71    | 0         | 579.089   | 114.886   | 927.329   | 554.382   | 251.018   | 205.371   | 380.315    | 35.938     | 0          | 0 | 0 | 35.938  | 0       |   |
| PVX_085000 | PF3D7_1430800         |                                                     |                                     | hypothetical protein, conserved                     | 1                                       | 268            | 0          |                | 0                       | 43.4014   | 0         | 0         | 0         | 0         | 0         | 0         | 0         | 21.8389    | 12.3727    | 0          | 0 | 0 | 12.3727 | 0       |   |
| PVX_118045 | PF3D7_1448900         | Late Male Marker                                    |                                     | hypothetical protein                                | 1                                       | 74             | 1          |                | 0                       | 0         | 0         | 0         | 0         | 0         | 0         | 0         | 0         | 0          | 58.2787    | 0          | 0 | 0 | 58.2787 | 0       |   |
| PVX_083570 | PF3D7_0424000         | Male Marker?                                        |                                     | Plasmodium exported protein, unknown function       | 2                                       | 300            | 1          |                | 94.7264                 | 397.014   | 0         | 0         | 0         | 0         | 0         | 0         | 0         | 0          | 18.8562    | 0          | 0 | 0 | 18.8562 | 0       |   |
