# Supplementary material for: Plasmodium vivax readiness to transmit: implication for malaria eradication
Source: Springer Nature journal article supplement (doi:10.1186/s12918-018-0669-4), 2019-01-11
Supplement: 12918_2018_669_MOESM5_ESM.pdf [file 12918_2018_669_MOESM5_ESM.pdf]

# *Plasmodium vivax* Readiness to Transmit: Implication for Malaria Eradication

S1 Text: Mathematical Models for *P. falciparum* and *P. vivax*

Swamy Rakesh Adapa, Rachel A. Taylor, Chengqi Wang, Richard Thomson-Luque, Leah R. Johnson and Rays H. Y. Jiang

1 We provide full details of the model equations for both *P. falciparum* and *P. vivax* that are  
2 analysed in the main text. We begin with *P. falciparum* as this is the simpler model and is similar  
3 to many models that have already been used to study malaria [10, 12].

## 4 **S1.1** *P. falciparum*

5 The model put forward for *P. falciparum* is based upon the Ross-MacDonald model [8, 9, 11]  
6 developed specifically for malaria but has since been used for many vector-borne diseases. It is a  
7 compartmental model of differential equations, i.e. both hosts (humans) and vectors (mosquitoes)  
8 are split into different compartments determined by their infection status and we analyze how the  
9 dynamics of each compartment changes over time. For *P. falciparum* humans are either Susceptible,  
10  $S(t)$ , Exposed,  $E(t)$ , Asymptomatic,  $A(t)$ , Infected,  $I(t)$ , or Removed,  $R(t)$ . A proportion  
11 of hosts will show symptoms and are labeled as Infected; the remaining proportion are Asymp-  
12 tomatic but are still able to transmit the disease. Removed hosts are those which have temporary  
13 immunity after a recent bout of infection. However, they lose this immunity and move back to  
14 being Susceptible to *P. falciparum* after a number of days. Mosquitoes are classified as being  
15 Susceptible,  $S_M(t)$ , Exposed,  $E_M(t)$ , or Infected,  $I_M(T)$ . In both cases, Exposed implies that the  
16 host or vector has been infected with the disease but is not able to transmit yet. That is, the  
17 pathogen is currently proceeding through the internal stages within the host or mosquito.

18 All hosts are born Susceptible. These Susceptible hosts progress to the Exposed class (Figure  
19 S1.1), due to a bite from an Infected vector (with some probability of successful transmission, see  
20 Equations (1)-(8)). Once Exposed, a host becomes either Asymptomatic or Infected after a fixed  
21 delay to account for the intrinsic incubation period, that is the number of days it takes for *P.*  
22 *falciparum* to reach the blood stage. Whilst all hosts have a natural death rate which includes  
23 death by natural causes and other factors unrelated to malaria infection, Infected hosts can also  
24 die due to *P. falciparum*. Otherwise, Asymptomatic and Infected hosts clear the infection and  
25 move to a Removed class, which indicates temporary immunity from *P. falciparum*. However, this  
26 lasts only for a short time, at which point they move back to the Susceptible class.

27 Similarly, all vectors are born Susceptible. These Susceptible vectors progress to the Exposed  
28 class after successful contact with an Infected host. They remain in the Exposed class for the  
29 extrinsic incubation period, the duration of time for *P. falciparum* to move from the mid-gut of  
30 the mosquito to the salivary glands. They progress to the Infected class and remain so for the

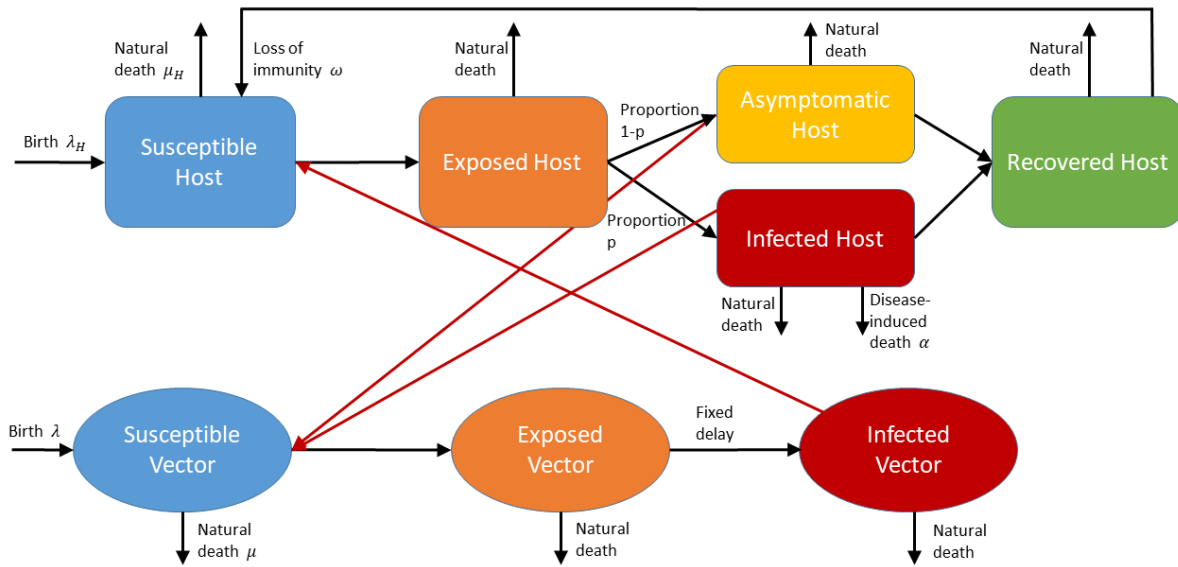

Figure S1.1: A schematic for the *P. falciparum* model. Hosts are represented through the rectangles, vectors in the circles. The processes of how to move between the different compartments are shown with black arrows. The red arrows show the role of interactions between hosts and vectors leading to disease. There are two infectious classes – one which shows symptoms at some point (Infected Host) and one which does not show symptoms (Asymptomatic Host).

31 remainder of their lifespan. We assume the mosquitoes do not suffer any side-effects from infection  
 32 by *P. falciparum* nor does it alter their behavior.

33 We assume that contact between mosquitoes and humans is frequency-dependent, which implies  
 34 that the number of bites from mosquitoes is not dependent on the density of humans [1]. This is  
 35 the usual assumption for vector-borne diseases as mosquitoes, and other vectors, will not increase  
 36 their bite rate because there are more hosts present. This leads to the following model equations:

$$\frac{dS}{dt} = \lambda_H - \frac{ab}{H}I_M S - \mu_H S + wR \quad (1)$$

$$\frac{dE}{dt} = \frac{ab}{H}I_M S - \frac{ab}{H}I_M(t - \tau)S(t - \tau)e^{-\mu_H \tau} - \mu_H E \quad (2)$$

$$\frac{dA}{dt} = (1 - p)\frac{ab}{H}I_M(t - \tau)S(t - \tau)e^{-\mu_H \tau} - rA - \mu_H A \quad (3)$$

$$\frac{dI}{dt} = p\frac{ab}{H}I_M(t - \tau)S(t - \tau)e^{-\mu_H \tau} - \alpha I - rI - \mu_H I \quad (4)$$

$$\frac{dR}{dt} = r(A + I) - \mu_H R - wR \quad (5)$$

$$\frac{dS_M}{dt} = \lambda M - (\lambda - \mu)\frac{M^2}{K} - \frac{ac}{H}(A + I)S_M - \mu S_M \quad (6)$$

$$\frac{dE_M}{dt} = \frac{ac}{H}I S_M - \frac{ace^{-\mu EIP}}{H}(A(t - EIP) + I(t - EIP))S_M(t - EIP) - \mu E_M \quad (7)$$

$$\frac{dI_M}{dt} = \frac{ace^{-\mu EIP}}{H}(A(t - EIP) + I(t - EIP))S_M(t - EIP) - \mu I_M \quad (8)$$

37 The parameters of the model are the following:  $\lambda_H$  and  $\mu_H$  are the birth rate and death rate  
 38 for humans, respectively;  $a$  is the bite rate of mosquitoes;  $b$  is the probability that a bite from an  
 39 infected mosquito on a susceptible host results in successful transmission;  $c$  is the probability that  
 40 a bite from a susceptible mosquito on an infected host results in successful transmission;  $\tau$  is the  
 41 time delay for hosts to move from the exposed to the infected class;  $p$  is the proportion of hosts that  
 42 show symptoms when they are infectious;  $\alpha$  is the rate of disease-induced death;  $r$  is the rate of  
 43 recovery from the disease;  $w$  is the rate that immunity is loss after infection;  $\lambda$  and  $\mu$  are the birth  
 44 and death rates of mosquitoes, respectively;  $K$  is a carrying capacity for the mosquitoes;  $EIP$  is  
 45 the time delay for the extrinsic incubation period, before mosquitoes move from the exposed to the  
 46 infected class; lastly  $H = S + E + I + R$  is the total host population size and  $M = S_M + E_M + I_M$   
 47 is the total mosquito population size. For parameter definitions and values, see Table S1.1.

48 The exponential terms,  $e^{-\mu_H \tau}$  and  $e^{-\mu EIP}$  account for the fact that natural death of the host  
 49 or mosquito may occur during the time it is exposed. Thus, not all hosts or vectors that enter the  
 50 exposed class will progress to the infected class; rather the total is discounted by the exponential  
 51 term.

52 We can calculate  $R_0$ , the basic reproductive number, which is a widely used criterion to deter-  
 53 mine the intensity of a disease and it's likelihood to spread. It represents the number of secondary  
 54 hosts that will be infected when one infected host is introduced into a naïve population. This  
 55 definition leads to the following criterion: if  $R_0 > 1$  disease prevalence is expected to increase in  
 56 the population; otherwise the number of infected hosts is expected to decline. The above model  
 57 for *P. falciparum* leads to the following equation for  $R_0$ :

$$R_0 = \left( \frac{Ma^2bc}{H\mu} e^{-\mu EIP} e^{-\mu_H \tau} \left( \frac{p}{\alpha + r + \mu_H} + \frac{1 - p}{r + \mu_H} \right) \right)^{\frac{1}{2}} \quad (9)$$

58 This equation can be understood by considering how infection would propagate through the  
 59 populations of vectors and hosts. It is composed of the ratio of mosquitoes to hosts ( $M/H$ ); the

60 number of mosquitoes that would bite the infected host and become infected ( $ac$ ); the proportion  
61 of those mosquitoes that survive to become infectious ( $e^{-\mu EIP}$ ); the lifespan of the mosquito ( $\frac{1}{\mu}$ );  
62 the number of hosts those mosquitoes bite and infect ( $ab$ ); the proportion of those hosts that  
63 survive to become infectious ( $e^{-\mu_H\tau}$ ); the length of time a host is infectious, which is  $\frac{1}{\alpha+r+\mu_H}$  for a  
64 proportion  $p$  of hosts, and  $\frac{1}{r+\mu_H}$  for the remaining proportion  $1-p$ . We will outline the calculations  
65 to produce  $R_0$  for the *P. vivax* model below. The same procedure can be used to calculate equation  
66 (9) for the *P. falciparum* model.

## 67 S1.2 *P. vivax*

68 We adapt the model for *P. falciparum* to include specific details of *P. vivax*, with a focus on  
69 the new information found experimentally. *P. vivax* is significantly different from *P. falciparum*,  
70 both because there are believed to be more asymptomatic cases and the high chance of relapses  
71 of the disease from 2-3 weeks to months and even years later, depending on whether the strain  
72 is tropical or temperate [15]. Asymptomatic cases for *P. falciparum* have been seen, perhaps due  
73 to continuous exposure to the disease in regions of high endemicity, but studies have suggested  
74 that submicroscopic cases will occur much more frequently for *P. vivax*, with up to 89% of sub-  
75 microscopic infections being asymptomatic [2, 6]. Relapses of *P. vivax* occur due to the presence  
76 of hypnozoites in the liver which will either die over time, or be released into the blood stream,  
77 re-infecting the host. The process that causes release of hypnozoites from the liver is unclear. We  
78 include two classes of Recovered hosts in our model (Figure S1.2), those with hypnozoites and the  
79 possibility of relapse, and those without. We do not keep track of the number of hypnozoites in the  
80 liver and thus how many times an individual host can relapse. Instead once they relapse, we treat  
81 them as any other infected host with probabilities of being recovered with or without hypnozoites.  
82 However, the probability of recovering with hypnozoites is calibrated by the average number of  
83 relapses each host is likely to have.

84 Similar to *P. falciparum*, we include both an asymptomatic compartment and an infected  
85 compartment. Those in the infected compartment do not necessarily show symptoms from the  
86 beginning of their infection, rather it indicates those hosts which have symptoms at some point,  
87 and therefore are likely to seek care and be logged in the health-care system as a *P. vivax* case. We  
88 set the proportion of hosts that show symptoms to be a proportion of those in the *P. falciparum*  
89 model in order to compare the role of asymptomatic hosts on disease transmission of both *P.*  
90 *falciparum* and *P. vivax*. Of the hosts that relapse in the *P. vivax* model, the same proportion  
91 will develop symptoms as for the initial infection.

92 From our computational experiments, we found that it is possible for human hosts to develop  
93 sexual stages much quicker in *P. vivax* than was previously thought possible. We include this  
94 reduction in length of the intrinsic incubation period by varying how long it takes for hosts to  
95 become infectious, and correspondingly we change the average length of time infectious (such that  
96 the total length of time exposed and infectious remains constant).

97 With these changes to the model, we produce a new schematic to show disease progression  
98 for hosts and vectors (Figure S1.2). As before, all hosts are born Susceptible. They progress to  
99 Exposed after a successful bite from an infectious vector. The length of time a host is in this class  
100 is once again given by a time delay, but we will vary the length of the delay to explore the effects  
101 of our experimental results. A proportion  $k_3p$  of the hosts will move into the Infected host class,  
102 while the remainder progress to the Asymptomatic compartment. Asymptomatic and Infected  
103 hosts will transmit the disease and will recover from the disease with the same probability but

104 only Infected hosts can die due to the disease. The likelihood of hosts recovering with or without  
 105 hypnozoites is the same for both Infected and Asymptomatic hosts.

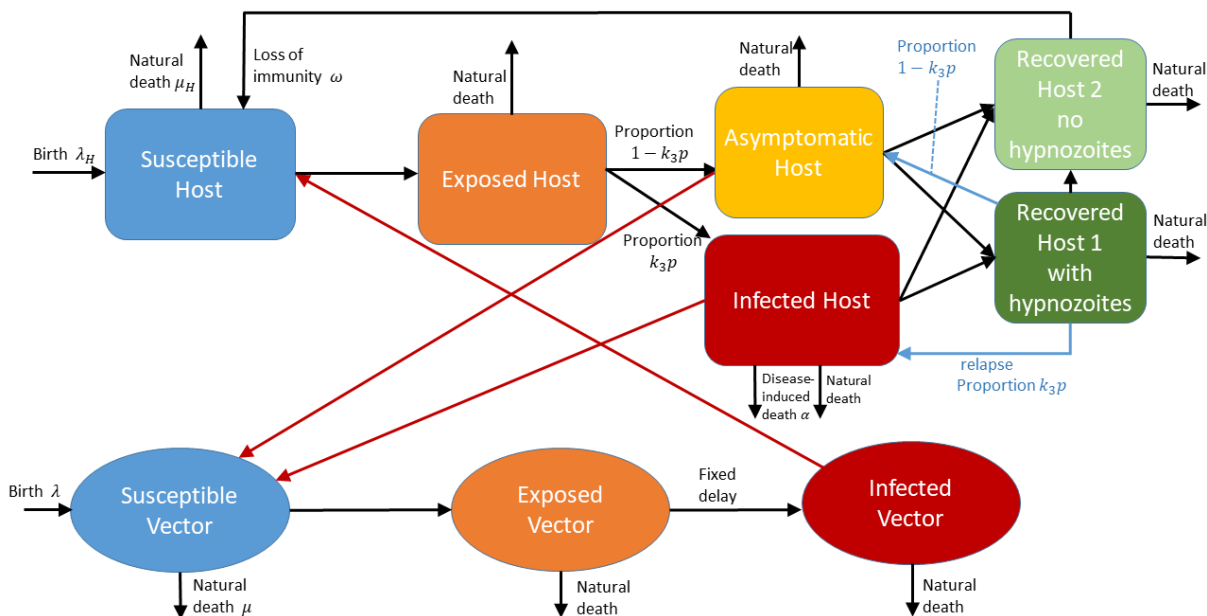

Figure S1.2: A schematic for the *P. vivax* model. Hosts are represented through the rectangles, vectors in the circles. The processes of how to move between the different compartments are shown with black arrows. The red arrows show the role of interactions between hosts and vectors leading to disease. After infection, a proportion have hypnozoites in their liver which can either cause relapse, or the hypnozoites die, in which case they move to Recovered Host 2 class before loss of immunity leads to movement back to the Susceptible class. Relapse can either be back into the Infected class or the Asymptomatic class, with the same proportion as for an initial infection.

The equations for the *P. vivax* model are:

$$\frac{dS}{dt} = \lambda_H - \frac{ab}{H}I_M S + wR_2 - \mu_H S \quad (10)$$

$$\frac{dE}{dt} = \frac{ab}{H}I_M S - \frac{ab}{H}I_M(t - \tau_1)S(t - \tau_1)e^{-\mu_H \tau_1} - \mu_H E \quad (11)$$

$$\frac{dA}{dt} = \frac{(1 - k_3 p)ab}{H}I_M(t - \tau_1)S(t - \tau_1)e^{-\mu_H \tau_1} + (1 - k_3 p)\nu R_1 - r_1 A - \mu_H A \quad (12)$$

$$\frac{dI}{dt} = \frac{k_3 p ab}{H}I_M(t - \tau_1)S(t - \tau_1)e^{-\mu_H \tau_1} + k_3 p \nu R_1 - k_1 \alpha I - r_1 I - \mu_H I \quad (13)$$

$$\frac{dR_1}{dt} = k_2 r_1(A + I) - \nu R_1 - \eta R_1 - \mu_H R_1 \quad (14)$$

$$\frac{dR_2}{dt} = (1 - k_2)r_1(A + I) + \eta R_1 - wR_2 - \mu_H R_2 \quad (15)$$

$$\frac{dS_M}{dt} = \lambda M - (\lambda - \mu)\frac{M^2}{K} - \frac{ac}{H}(A + I)S_M - \mu S_M \quad (16)$$

$$\frac{dE_M}{dt} = \frac{ac}{H}(A + I)S_M - \frac{ac}{H}(A(t - EIP) + I(t - EIP))S_M(t - EIP)e^{-\mu EIP} - \mu E_M \quad (17)$$

$$\frac{dI_M}{dt} = \frac{ac}{H}(A(t - EIP) + I(t - EIP))S_M(t - EIP)e^{-\mu EIP} - \mu I_M \quad (18)$$

106 The new host compartments, as discussed above, are Recovered with hypnozoites,  $R_1(t)$ , and  
 107 Recovered without hypnozoites,  $R_2(t)$ . Parameters with the same name as in Equations (1)-(8)  
 108 are defined in the same way and have the same value. The new parameters are:  $\tau_1$  is the length of  
 109 the exposed time delay;  $k_3$ , a proportionality constant relating the proportion of hosts that show  
 110 symptoms in the *P. vivax* model to the *P. falciparum* model;  $k_1$ , a proportionality constant relating  
 111 death caused by *P. vivax* to *P. falciparum*;  $r_1$ , the rate of recovery in *P. vivax*;  $k_2$ , the proportion  
 112 of hosts leaving the Infected/Asymptomatic stages that have hypnozoites in their liver, and thus  
 113 can potentially relapse;  $\eta$ , the rate of death of hypnozoites in the liver and thus movement from  
 114 one Removed class to the second; and  $\nu$ , the rate of relapse caused by hypnozoites. Parameter  
 115 values and definitions are given in Table S1.1.

### 116 S1.2.1 Calculating $R_0$

117 We go through the procedure to calculate  $R_0$  for this model. It is based upon the work of [4, 5] which  
 118 introduces the idea of next-generation matrices. Some good examples of using this method are  
 119 provided in [14, 17] with specific examples for vector-borne diseases. A further example, specifically  
 120 for delay-differential equations, is in [1]. The next-generation matrix approach involves calculating  
 121  $R_0$  as the largest eigenvalue of the matrix  $FV^{-1}$  in which  $F$  is defined as the transmission matrix  
 122 and  $V$  is defined as the transition matrix. We outline this process in more detail: first we focus  
 123 only on those classes which are considered infectious. For our model (10)-(18) for *P. vivax*, the  
 124 infectious classes are (10), (11), (12), (13), (16) and (17), i.e. Exposed host, Asymptomatic host,  
 125 Infected host, Recovered host with hypnozoites, Exposed vector and Infected vector. For both  
 126 matrices, the rows and columns will be delimited by these classes in the order just stated. The  
 127 transmission matrix  $F$  is a matrix indicating new infections arising in each of the population

128 classes, moving from columns to rows. Explicitly, it outlines how a host or vector in a column  
 129 class can lead to a new infection in a vector or host in the row classes. For our system, we have  
 130 the following matrix for  $F$ :

$$F = \begin{pmatrix} 0 & 0 & 0 & 0 & 0 & \frac{ab}{H}S \\ 0 & 0 & 0 & 0 & 0 & 0 \\ 0 & 0 & 0 & 0 & 0 & 0 \\ 0 & 0 & 0 & 0 & 0 & 0 \\ 0 & \frac{ac}{H}S_M & \frac{ac}{H}S_M & 0 & 0 & 0 \\ 0 & 0 & 0 & 0 & 0 & 0 \end{pmatrix} \quad (19)$$

131 For example, the term in the first row is the rate of new infections that arise from an infected  
 132 mosquito that go into the  $E$  class. Those on the 5th row represent the rate of new infections  
 133 arising in the  $E_M$  class from both the  $A$  and  $I$  classes.

134 The matrix  $V$  is a transition matrix, outlining other movement between classes not caused by  
 135 new infectious contact between mosquito and host. Once again, we have each row and column  
 136 representing equations (10)-(13), (16) and (17) in that order. Of particular note is that movement  
 137 out of a class is considered positive, whilst movement into a class is negative. This produces the  
 138 following transition matrix:

$$V = \begin{pmatrix} 1 & 0 & 0 & 0 & 0 & 0 \\ -(1 - k_3p)e^{-\mu_H\tau_1} & r_1 + \mu_H & 0 & -(1 - k_3p)\nu & 0 & 0 \\ -k_3pe^{-\mu_H\tau_1} & 0 & k_1\alpha + r_1 + \mu_H & -k_3p\nu & 0 & 0 \\ 0 & -k_2r_1 & -k_2r_1 & \nu + \eta + \mu_H & 0 & 0 \\ 0 & 0 & 0 & 0 & 1 & 0 \\ 0 & 0 & 0 & 0 & -e^{-\mu EIP} & \mu \end{pmatrix} \quad (20)$$

139 How to treat movement between classes when there is a fixed delay is not intuitive. We  
 140 handle this by noting that all hosts or vectors leave the exposed class, either through time delayed  
 141 movement to an infected class, or through death. As there is a time delay, it is not important to  
 142 know the rate at which hosts or vectors leave the class. Thus, we have 1's in (row, column) =  
 143 (1, 1) and (5, 5) in  $V$  indicating that all hosts/vectors leave these exposed classes. But we need to  
 144 consider what proportion of the exposed class progresses to the infected class rather than dying:  
 145 these are the exponential terms in (2, 1), (3, 1) and (6, 5), with the appropriate negative signs to  
 146 indicate movement into the class.

The next step is to calculate  $V^{-1}$ . First we calculate the determinant of the matrix:

$$\begin{aligned} \det(V) &= \mu(r_1 + \mu_H) ((k_1\alpha + r_1 + \mu_H)(\nu + \eta + \mu_H) - k_3p\nu k_2r_1) - \mu(k_1\alpha + r_1 + \mu_H)(1 - k_3p)\nu k_2r_1 \\ &= \mu((r_1 + \mu_H)G_1 - (k_1\alpha + r_1 + \mu_H)G_2) \end{aligned}$$

147 where we introduce  $G_1$  and  $G_2$  to simplify the presentation. Proceeding through the steps of  
 148 calculating the inverse, which can be done by hand or using a suitable computer program, produces  
 149 the following:

$$V^{-1} = \frac{1}{\det V} \begin{pmatrix} \det V & 0 & 0 & 0 & 0 & 0 & 0 & 0 & 0 \\ e^{-\mu_H \tau_1} ((1 - k_3 p) G_1 + k_3 p G_2) & \mu G_1 & 0 & 0 & 0 & 0 & 0 & 0 & 0 \\ k_3 p e^{-\mu_H \tau_1} (r_1 + \mu_H) (\nu + \eta + \mu_H) \mu & \mu G_2 \frac{k_3 p}{1 - k_3 p} & 0 & 0 & 0 & 0 & 0 & 0 & 0 \\ e^{-\mu_H \tau_1} \mu \frac{G_2}{\nu} \left( (k_1 \alpha + r_1 + \mu_H) + (r_1 + \mu_H) \frac{k_3 p}{1 - k_3 p} \right) & (k_1 \alpha + r_1 + \mu_H) k_2 r_1 \mu & 0 & 0 & 0 & 0 & 0 & 0 & 0 \\ 0 & 0 & 0 & 0 & 0 & 0 & 0 & 0 & 0 \\ 0 & 0 & 0 & 0 & 0 & 0 & 0 & 0 & 0 \\ 0 & 0 & 0 & 0 & 0 & 0 & 0 & 0 & 0 \\ (r_1 + \mu_H) (\nu + \eta + \mu_H) \mu - \mu G_2 & (k_1 \alpha + r_1 + \mu_H) (1 - k_3 p) \nu \mu & 0 & 0 & 0 & 0 & 0 & 0 & 0 \\ (r_1 + \mu_H) k_2 r_1 \mu & (r_1 + \mu_H) k_3 p \nu \mu & 0 & 0 & 0 & 0 & 0 & 0 & 0 \\ 0 & (k_1 \alpha + r_1 + \mu_H) (r_1 + \mu_H) \mu & 0 & 0 & 0 & 0 & 0 & 0 & 0 \\ 0 & 0 & \det V & 0 & 0 & 0 & 0 & 0 & 0 \\ 0 & 0 & \frac{\det V}{\mu} e^{-\mu E I P} & \frac{\det V}{\mu} & 0 & 0 & 0 & 0 & 0 \end{pmatrix} \quad (21)$$

Next we calculate  $FV^{-1}$  in order to compute its eigenvalues. As the matrix is mostly zeroes but some terms are quite long, we separately display the components of the matrix which are non-zero using (row, column) notation:

$$(5, 1) = \frac{ac\mu}{\det V} \frac{S_M}{H} e^{-\mu_H \tau_1} \left[ (1 - k_3 p) \left( G_1 + G_2 \frac{k_3 p}{1 - k_3 p} \right) + k_3 p (r_1 + \mu_H) (\nu + \eta + \mu_H) \right]$$

$$(5, 2) = \frac{ac\mu}{\det V} \frac{S_M}{H} \left( G_1 + G_2 \frac{k_3 p}{1 - k_3 p} \right)$$

$$(5, 3) = \frac{ac\mu}{\det V} \frac{S_M}{H} (r_1 + \mu_H) (\nu + \eta + \mu_H)$$

$$(5, 4) = \frac{ac\mu}{\det V} \frac{S_M}{H} \left( (k_1 \alpha + r_1 + \mu_H) (1 - k_3 p) \nu + (r_1 + \mu_H) k_3 p \nu \right)$$

$$(1, 5) = \frac{abS}{H} \frac{e^{-\mu E I P}}{\mu}$$

$$(1, 6) = \frac{abS}{H} \frac{1}{\mu}$$

150 One important aspect to note is that for calculating  $R_0$  we assume that there is only one  
151 infected host in an otherwise susceptible population of both hosts and vectors. Therefore, we will  
152 assume that  $S \approx H$  and  $S_M = M$ , the total vector population.

153 The final step is to calculate the eigenvalues of this matrix  $FV^{-1}$ . There are 4 zero eigenvalues  
154 and a double root of a quadratic. As  $R_0$  is the largest positive eigenvalue, we take the positive  
155 root. With some simplification, we end with:

$$R_0 = \left\{ a^2 bc \frac{M}{H} \frac{e^{-\mu E I P}}{\mu} e^{-\mu_H \tau_1} \left[ \frac{(1 - k_3 p) (k_1 \alpha + r_1 + \mu_H) + k_3 p (r_1 + \mu_H)}{(k_1 \alpha + r_1 + \mu_H) (r_1 + \mu_H) - ((1 - k_3 p) (k_1 \alpha + r_1 + \mu_H) + k_3 p (r_1 + \mu_H)) \left( \frac{\nu k_2 r_1}{\nu + \eta + \mu_H} \right)} \right] \right\}^{\frac{1}{2}} \quad (22)$$

156 Although this equation seems complicated, it can be reasonably well understood by thinking in  
157 terms of how the disease progresses through the vector and host populations. Most of the terms



158 in (9) are present in (22); the difference results from a more complicated length of time infectious.  
 159 To understand it more clearly, we can consider some of the components separately:

$$\frac{(1 - k_3p)(k_1\alpha + r_1 + \mu_H) + k_3p(r_1 + \mu_H)}{(k_1\alpha + r_1 + \mu_H)(r_1 + \mu_H)} = k_3p \frac{1}{k_1\alpha + r_1 + \mu_H} + (1 - k_3p) \frac{1}{r_1 + \mu_H} \quad (23)$$

160 The right hand side has a more intuitive meaning than the left: a proportion  $k_3p$  go into the  
 161 infected class for an average length of time infectious given by  $\frac{1}{k_1\alpha + r_1 + \mu_H}$ , while a proportion  
 162  $1 - k_3p$  move into the asymptomatic class for an average length of time  $\frac{1}{r_1 + \mu_H}$ . This term within  
 163 (22) is regulated by those hosts that relapse:  $\frac{\nu}{\nu + \eta + \mu_H}$  is the proportion of recovered hosts with  
 164 hypnozoites that relapse, and  $k_2r_1$  is the rate at which infected and asymptomatic hosts recover  
 165 with hypnozoites.

### 166 S1.2.2 The role of Asymptomatic Hosts

167 Above, in the *P. vivax* model, we assumed that a proportion  $k_3p$  of infected hosts had symptoms  
 168 at some point, whilst the remaining proportion  $1 - k_3p$  were asymptomatic. It is unclear how many  
 169 asymptomatic hosts there could be, therefore we vary the parameters  $p$  and  $k_3$  to assess the effect  
 170 of asymptomatics on  $R_0$ . However, this is assuming that we take into account that asymptomatics  
 171 exist, but do not know in what proportion. We ask now, what happens when you do not take into  
 172 account transmission by asymptomatics at all? To do this we use similar equations to (10)-(18)  
 173 but we no longer think of the Asymptomatic host  $A(t)$  as able to transmit infection. However,  
 174 exposed hosts can still move into the asymptomatic class with the same proportion  $1 - k_3p$ . When  
 175 calculating  $R_0$  using the procedure outlined above, the  $A(t)$  equation will not be considered an  
 176 infectious class. This leads to the following equation for  $R_0$ :

$$R_0 = \left( a^2bc \frac{M}{H} \frac{e^{-\mu EIP}}{\mu} k_3p e^{-\mu_H \tau_1} \frac{1}{k_1\alpha + r_1 + \mu_H - k_3p \left( \frac{\nu k_2 r_1}{\nu + \eta + \mu_H} \right)} \right)^{\frac{1}{2}} \quad (24)$$

177 We can compare this  $R_0$  to the  $R_0$  for *P. vivax* and *P. falciparum* above and assess how much  
 178 information is lost by not taking into account the asymptomatic compartment.

## 179 S1.3 Parameter Values

180 We outline our choice of parameter values for the *P. falciparum* and *P. vivax* models (Table S1.1).  
 181 We only consider those parameters that are different between the  $R_0$  equations (9) and (22). We  
 182 assume that the transmission rates between hosts and mosquitoes and the length of time for the  
 183 mosquito to become infectious will be the same for *P. falciparum* and *P. vivax*.

184 The host death rate is given by assuming an average lifespan of 71.5 years [13]. The disease-  
 185 induced death rate for *P. falciparum* is found by assuming 1 million deaths per year to an estimated  
 186 350-500 million cases [18]. *P. vivax* has an estimated 13.8 million cases per year with death caused  
 187 by *P. vivax* in the range 1400 - 14900 [18]. Therefore, the disease-induced death rate of *P.*  
 188 *vivax* should be between 0.0001-0.001 and hence  $k_1$ , the proportionality constant relating the two  
 189 disease-induced death rates, will be between 0.05-0.5.

190 To determine what proportion of hosts leaving the infectious classes will recover with hypno-  
 191 zoites (parameter  $k_2$ ), we use the fact that on average a host will have 2.1 relapses [16]. Using the

| Parameter  | Definition                                                      | Value                 | Reference |
|------------|-----------------------------------------------------------------|-----------------------|-----------|
| $\mu_H$    | Host death rate                                                 | $3.84 \times 10^{-5}$ | [13]      |
| $\alpha$   | Disease-induced death rate for <i>P. falciparum</i>             | 0.002                 | [18]      |
| $k_1$      | Proportional rate of disease death for <i>P. vivax</i>          | 0.25                  | [18]      |
| $r$        | Recovery rate for <i>P. falciparum</i>                          | 1/60                  | [3]       |
| $r_1$      | Recovery rate for <i>P. vivax</i>                               | $1/(60 + \epsilon)$   | -         |
| $\tau$     | Length of exposed period for <i>P. falciparum</i>               | 14                    | [7]       |
| $\tau_1$   | Length of exposed period for <i>P. vivax</i>                    | $\tau - \epsilon$     | -         |
| $\epsilon$ | Reduction in length of exposed period for <i>P. vivax</i>       | 0–7 (3.5)             | -         |
| $p$        | Proportion of infected <i>P. falciparum</i> hosts with symptoms | 0–1 (1)               | -         |
| $k_3$      | Proportional rate of having symptoms in <i>P. vivax</i> model   | 0–1 (1)               | -         |
| $k_2$      | Proportion of recovering hosts with hypnozoites                 | 0.68                  | [16]      |
| $\nu$      | Hypnozoite relapse rate                                         | 1/72                  | [16]      |
| $\eta$     | Hypnozoite death rate in liver                                  | 1/223                 | [16]      |

Table S1.1: Parameter definitions with the values used to calculate  $R_0$  for *P. falciparum* (Eqn (9)) and for *P. vivax* (Eqn (22)). For  $p$ ,  $k_3$  and  $\epsilon$ , their range is given with a base value given in parentheses. All rates are in days

concept of Bernoulli trials, the host essentially has an average of 2.1 failures (clearing the infection with hypnozoites) until it has a success (clearing the infection without hypnozoites). This leads to a probability of 0.68 for a failure, i.e. clearing with hypnozoites.

We introduce a new parameter,  $\epsilon$ , to describe the reduction in length of the intrinsic incubation period, and hence the increase in length until average recovery time with *P. vivax*. A larger  $\epsilon$  indicates a bigger difference in incubation length between *P. falciparum* and *P. vivax* which corresponds to the disease transmitting sooner for *P. vivax*. This affects both parameters  $\tau$  and  $r$  as seen in Table S1.1, producing  $\tau_1$  and  $r_1$ . Parameters  $\epsilon$ ,  $p$  and  $k_3$  vary over a range therefore we set a baseline value for them, for  $p$  and  $k_3$  this is 1 to indicate the baseline assumption is that there are no asymptomatic hosts for either *P. falciparum* or *P. vivax*.

## S1.4 Methods

We use Matlab to compare the values of  $R_0$  for *P. falciparum* and *P. vivax*. As we are looking at the relative values of  $R_0$  we need only consider those terms within each  $R_0$  which are different. We treat the value of  $R_0$  for *P. falciparum* as a baseline, setting it's value equal to 1 when  $p = 1$  and determining how much  $R_0$  for *P. vivax* differs. We focus on the change in the length of the intrinsic incubation period which correspondingly changes the length of time infectious, but also consider the role of asymptomatic hosts in spreading infection and of relapses. To do this, we perform a sensitivity analysis for  $R_0$ , in which all parameters are varied by 10% and the resultant change in  $R_0$  is plotted. For parameters  $p$ ,  $k_3$  and  $\epsilon$ , we vary the parameters over their whole range rather than by 10%.

## References

- [1] R. M. Anderson and R. M. May. *Infectious diseases of humans: dynamics and control*, volume 28. Wiley Online Library, 1991.

- 215 [2] Q. Cheng, J. Cunningham, and M. L. Gatton. Systematic review of sub-microscopic *P. vivax*  
216 infections: prevalence and determining factors. *PLoS Negl Trop Dis*, 9(1):e3413, 2015.
- 217 [3] W. E. Collins, G. M. Jeffery, and J. M. Roberts. A retrospective examination of anemia during  
218 infection of humans with *Plasmodium vivax*. *The American journal of tropical medicine and*  
219 *hygiene*, 68(4):410–412, 2003.
- 220 [4] O. Diekmann and J. A. P. Heesterbeek. *Mathematical epidemiology of infectious diseases:*  
221 *model building, analysis and interpretation*, volume 5. John Wiley & Sons, 2000.
- 222 [5] O. Diekmann, J. Heesterbeek, and M. Roberts. The construction of next-generation matrices  
223 for compartmental epidemic models. *Journal of the Royal Society Interface*, page rsif20090386,  
224 2009.
- 225 [6] R. E. Howes, K. E. Battle, K. N. Mendis, D. L. Smith, R. E. Cibulskis, J. K. Baird, and S. I.  
226 Hay. Global epidemiology of *Plasmodium vivax*. *The American Journal of Tropical Medicine*  
227 *and Hygiene*, 95(6 Suppl):15–34, 2016.
- 228 [7] D. H. Kerlin and M. L. Gatton. A simulation model of the within-host dynamics of *Plasmod-*  
229 *ium vivax* infection. *Malaria journal*, 14(1):1–9, 2015.
- 230 [8] G. Macdonald. The analysis of equilibrium in malaria. *Tropical diseases bulletin*, 49(9):  
231 813–829, 1952.
- 232 [9] G. Macdonald. Epidemiologic models in studies of vector-borne diseases: The R.E Dyer  
233 lecture. *Public health reports*, 76(9):753, 1961.
- 234 [10] R. C. Reiner, T. A. Perkins, C. M. Barker, T. Niu, L. F. Chaves, A. M. Ellis, D. B. George,  
235 A. Le Menach, J. R. Pulliam, D. Bisanzio, et al. A systematic review of mathematical models  
236 of mosquito-borne pathogen transmission: 1970–2010. *Journal of The Royal Society Interface*,  
237 10(81):20120921, 2013.
- 238 [11] R. Ross. The prevention of malaria. 1911.
- 239 [12] D. L. Smith, K. E. Battle, S. I. Hay, C. M. Barker, T. W. Scott, and F. E. McKenzie. Ross,  
240 macdonald, and a theory for the dynamics and control of mosquito-transmitted pathogens.  
241 *PLoS pathog*, 8(4):e1002588, 2012.
- 242 [13] United Nations Department of Economic and Social Affairs. United Nations World Population  
243 Prospects: 2015 revision. 2015.
- 244 [14] P. Van den Driessche and J. Watmough. Reproduction numbers and sub-threshold endemic  
245 equilibria for compartmental models of disease transmission. *Mathematical biosciences*, 180  
246 (1):29–48, 2002.
- 247 [15] M. T. White, S. Karl, K. E. Battle, S. I. Hay, I. Mueller, and A. C. Ghani. Modelling the  
248 contribution of the hypnozoite reservoir to *Plasmodium vivax* transmission. *Elife*, 3:e04692,  
249 2014.
- 250 [16] M. T. White, G. Shirreff, S. Karl, A. C. Ghani, and I. Mueller. Variation in relapse frequency  
251 and the transmission potential of *Plasmodium vivax* malaria. In *Proc. R. Soc. B*, volume 283,  
252 page 20160048. The Royal Society, 2016.

- 253 [17] M. J. Wonham, T. de Camino-Beck, and M. A. Lewis. An epidemiological model for west nile  
254 virus: invasion analysis and control applications. *Proceedings of the Royal Society of London*  
255 *B: Biological Sciences*, 271(1538):501–507, 2004.
- 256 [18] World Health Organisation. World Malaria Report. 2015.
